# Supplementary material for: Capturing in vivo RNA transcriptional dynamics from the malaria parasite Plasmodium falciparum
Source: PubMed Central journal article supplement — Genome Res. 2017 Jun;27(6):1074–86. doi: 10.1101/gr.217356.116 (PMC5453321; doi:10.1101/gr.217356.116), 2017-06
Supplement: supp_gr.217356.116_Supplemental_Figure_S1.pdf [file supp_gr.217356.116_Supplemental_Figure_S1.pdf]

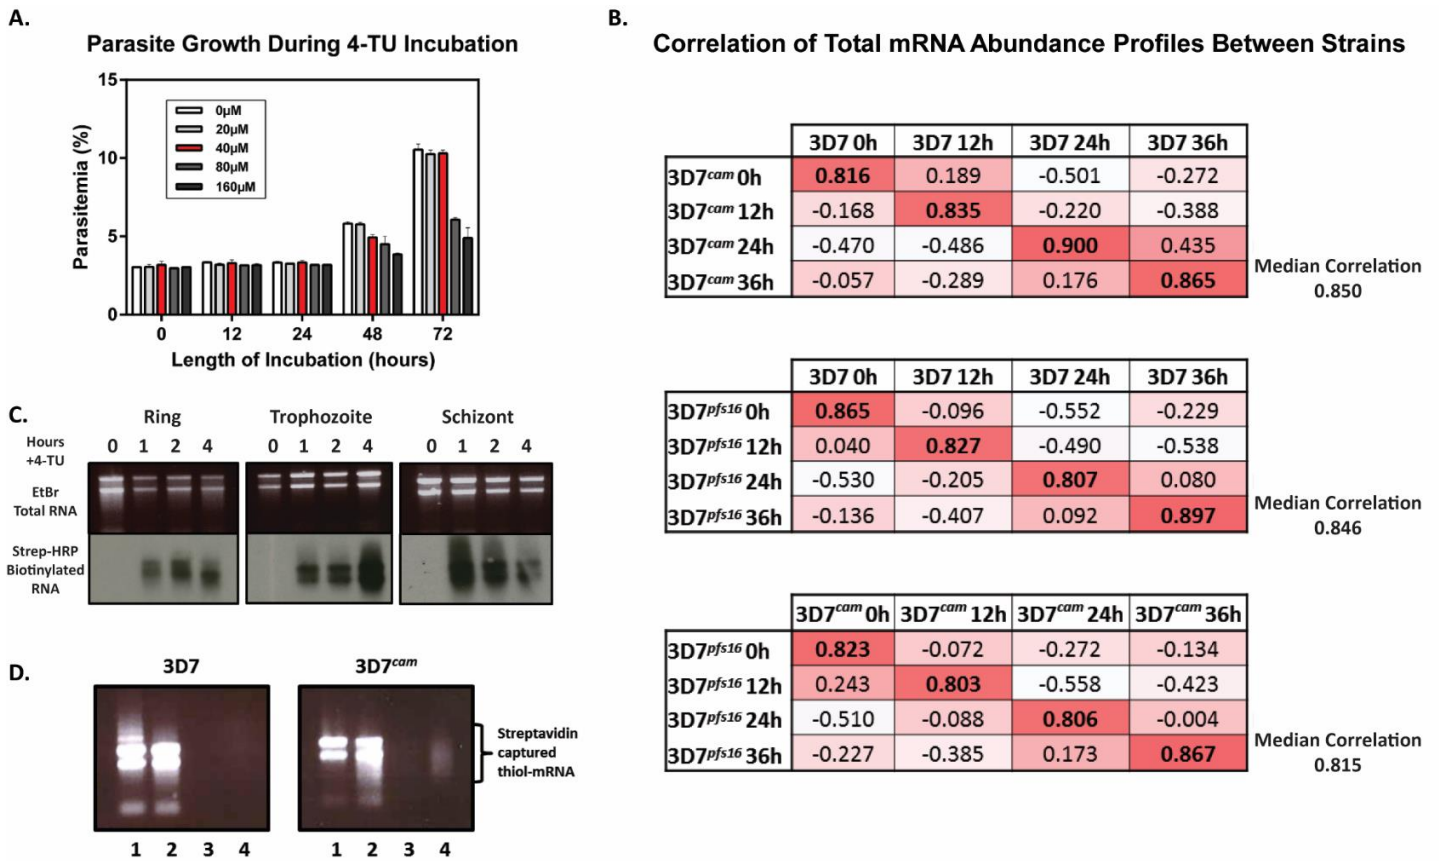

**Figure S1: The effects of 4-TU incorporation and capture throughout *P. falciparum* 3D7<sup>cam</sup> development within human erythrocytes.** A) 4-TU has a concentration dependent effect on development. *P.f.* 3D7<sup>cam</sup> growth in the presence of various concentrations of 4-TU (0, 20, 40, 80, 160 $\mu$ M) was monitored every 12hrs for 72hrs by Giemsa-stained thin blood films. Parasitemia percentages (infected/uninfected erythrocytes) are represented as an average of two independent experiments  $\pm$  s.d. across this timeframe, 40 $\mu$ M (red bars) or less had no effect on parasite growth. B) Transcript abundance profiles during the IDC were not altered by the addition of 40 $\mu$ M 4-TU. Total RNA isolated from 3D7<sup>cam</sup> and 3D7<sup>pfs16</sup> incubated for 12h with 40 $\mu$ M 4-TU was compared by DNA microarray. The Pearson correlation ( $r$ ) of the  $\text{Log}_2(\text{Cy}3/\text{Cy}5)$  ratio for each gene across the array at 0, 12, 24, and 36h was calculated. The median correlation of the  $\text{log}_2$  ratio of each gene over time in either 3D7<sup>cam</sup> (top panel) or 3D7<sup>pfs16</sup> (middle panel) compared to a previously published 3D7 mRNA abundance timecourse (Kafsack et al. 2012) was 0.850 and 0.846, respectively. The median correlation between total RNA abundance of 3D7<sup>cam</sup> and 3D7<sup>pfs16</sup> was determined to be 0.815. C) To ensure that 4-TU is efficiently incorporated throughout the IDC, highly synchronized *P.f.* 3D7<sup>cam</sup> was grown in the presence of 40 $\mu$ M 4-TU for various lengths of time (0, 1, 2, 4 hours) during three major developmental stages during the IDC (ring, trophozoite, and schizont). Following incubation, total RNA was extracted, biotinylated and separated on an agarose gel (2 $\mu$ g/lane) (top panel). Incorporation of 4-TU throughout the IDC was assessed by Northern blot and probed with streptavidin-HRP (bottom panel). D) Thiolated RNA can be separated from the parasite total RNA using streptavidin magnetic beads. Biotinylated RNA from both wild-type 3D7 and 3D7<sup>cam</sup> eluted from streptavidin magnetic beads was run on an ethidium bromide stained gel as follows: (1) total RNA, (2) flow-through/non-biotinylated RNA, (3) last wash of 4, and (4)  $\beta$ -mercaptoethanol eluted/thiol-tagged RNA.
