# Supplementary material for: Capturing in vivo RNA transcriptional dynamics from the malaria parasite Plasmodium falciparum
Source: PubMed Central journal article supplement — Genome Res. 2017 Jun;27(6):1074–86. doi: 10.1101/gr.217356.116 (PMC5453321; doi:10.1101/gr.217356.116), 2017-06
Supplement: supp_gr.217356.116_Supplemental_Figure_S3.pdf [file supp_gr.217356.116_Supplemental_Figure_S3.pdf]

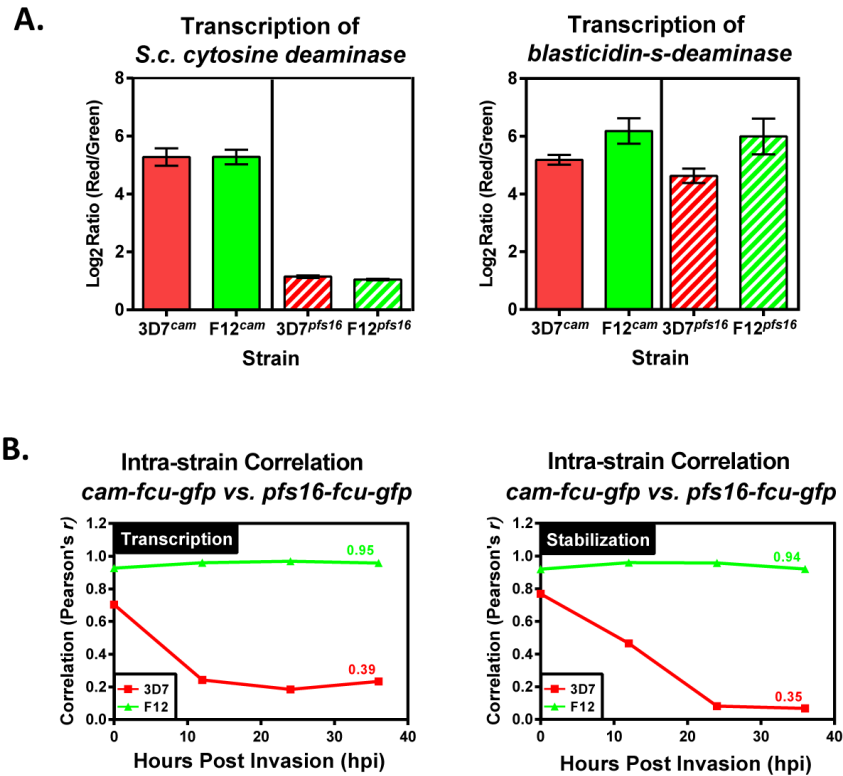

**Figure S3 related to Figure 4: The expression level of *fcu-gfp* are promoter dependent.** A) Nascent transcription of *cytosine deaminase*, a portion of the *fcu-gfp* fusion gene driven by either 5'*cam* or 5'*pfs16*, is represented as the median normalized Log<sub>2</sub>(red/green) ratios in each line over time (error bars represent the s.d. of four time-points). In addition, transcription of *blasticidin-s-deaminase* (*bsd*, driven by 5'*hsp86*) is represented in the same manner. The gene product of *bsd* is the drug selectable marker of the episomal plasmid containing *fcu-gfp* and transcription should not be strain-specific. B) Intra-strain Pearson correlation coefficient (*r*) of all transcribed (left panel) and stabilized (right panel) mRNAs across the DNA microarray timecourse from either *cam-fcu-gfp* or *pfs16-fcu-gfp* expressing 3D7 (red) and F12 (green) parasites. The overall median *r* is noted for each strain.
