# Supplementary material for: Capturing in vivo RNA transcriptional dynamics from the malaria parasite Plasmodium falciparum
Source: PubMed Central journal article supplement — Genome Res. 2017 Jun;27(6):1074–86. doi: 10.1101/gr.217356.116 (PMC5453321; doi:10.1101/gr.217356.116), 2017-06
Supplement: supp_gr.217356.116_Supplemental_Figure_S4.pdf [file supp_gr.217356.116_Supplemental_Figure_S4.pdf]

### Median Log<sub>2</sub>(Cy3/Cy5) of Genes in Cluster 8

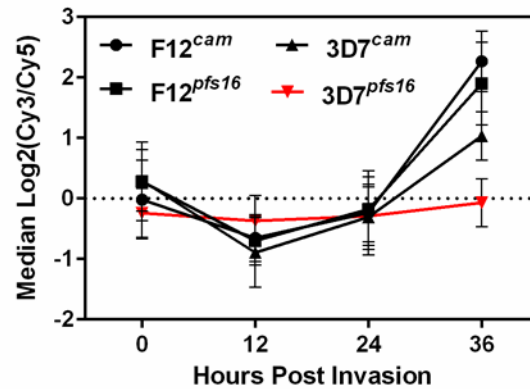

### GO-term enrichment of Genes in Cluster 8

| GO number | GO term                   | P-value  |
|-----------|---------------------------|----------|
| 0040011   | Locomotion                | 4.94e-10 |
| 0051828   | Entry into other organism | 9.69e-10 |
| 0052126   | Movement in host          | 9.69e-10 |
| 0044409   | Entry into host           | 9.69e-10 |

**Figure S4 related to Figure 4: Asexual-specific genes transcriptionally silent in 3D7<sup>pfs16</sup> committed gametocytes.** A) The median Log<sub>2</sub>(Cy3/Cy5) ratios of 319 genes in Cluster 8 plotted over time from 3D7<sup>cam</sup>, 3D7<sup>pfs16</sup>, F12<sup>cam</sup> and F12<sup>pfs16</sup> with ± s.d. B) GO-term enrichment of genes in Cluster 3 and associated p-value score.
