# Supplementary material for: Capturing in vivo RNA transcriptional dynamics from the malaria parasite Plasmodium falciparum
Source: PubMed Central journal article supplement — Genome Res. 2017 Jun;27(6):1074–86. doi: 10.1101/gr.217356.116 (PMC5453321; doi:10.1101/gr.217356.116), 2017-06
Supplement: supp_gr.217356.116_Supplemental_Figure_S6.pdf [file supp_gr.217356.116_Supplemental_Figure_S6.pdf]

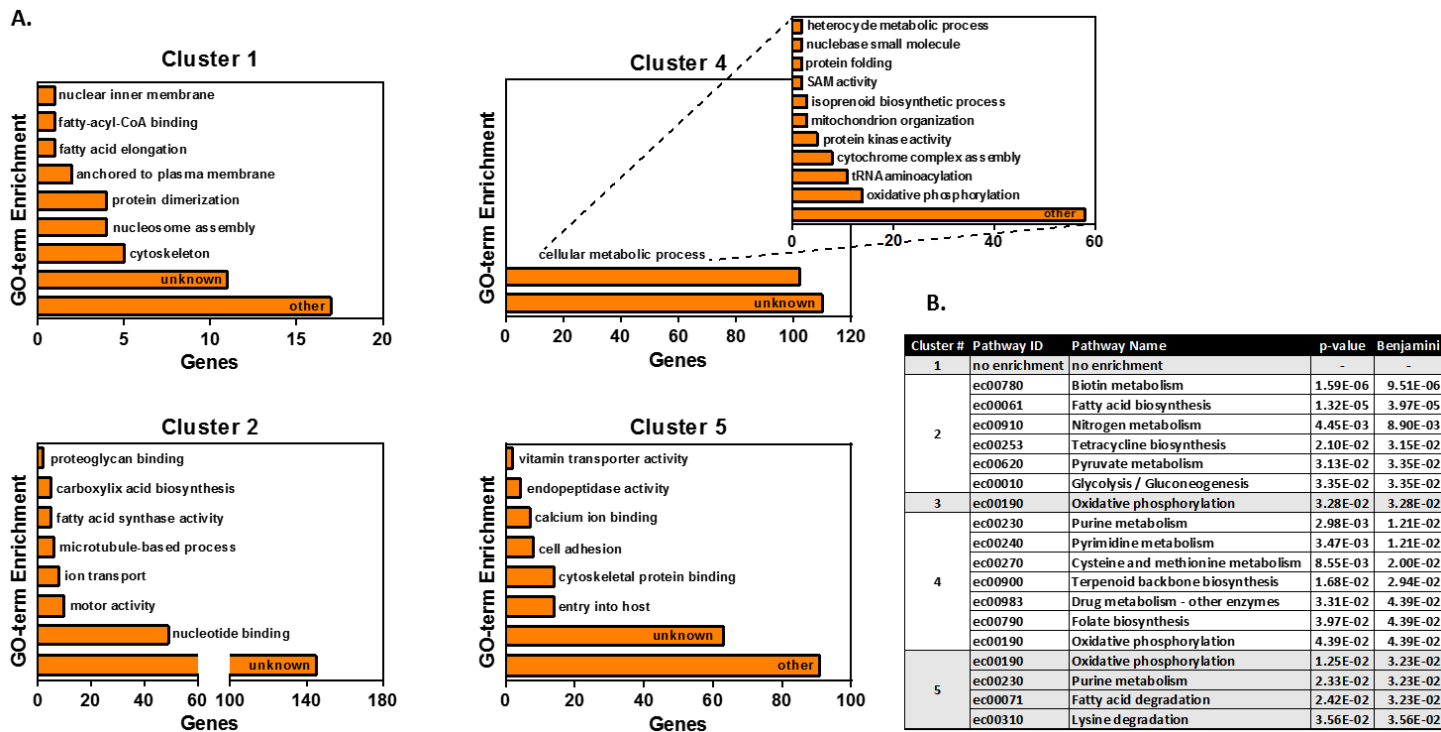

**Figure S6 related to Figure 5: Molecular, biological, and metabolic enrichment analysis of gametocyte-specific genes.** A) Molecular Process and Biological Function GO-term enrichment ( $p\text{-value} \geq 0.005$ ) of the 808 gametocyte-specific transcribed and stabilized genes identified in 3D7 ( $\log_2$  fold change  $pfs16/cam \geq 1$ ,  $p\text{-value} \leq 0.001$ ) by cluster. B) KEGG pathway enrichment ( $p\text{-value} \geq 0.05$ ) of gametocyte-specific transcribed and stabilized genes ( $\log_2$  fold change  $pfs16/cam \geq 1$ ,  $p\text{-value} \leq 0.001$ ).
