# Supplementary material for: Capturing in vivo RNA transcriptional dynamics from the malaria parasite Plasmodium falciparum
Source: PubMed Central journal article supplement — Genome Res. 2017 Jun;27(6):1074–86. doi: 10.1101/gr.217356.116 (PMC5453321; doi:10.1101/gr.217356.116), 2017-06
Supplement: supp_gr.217356.116_Supplemental_Figure_S7.pdf [file supp_gr.217356.116_Supplemental_Figure_S7.pdf]

| <u>5' enriched motif</u>                                                            | <u>z-score</u> | <u>p-value</u> | <u>Potential Interacting Protein</u>                                    |
|-------------------------------------------------------------------------------------|----------------|----------------|-------------------------------------------------------------------------|
|    | 191.0          | 1.33e-55       | N/A                                                                     |
|    | 47.8           | 6.89e-16       | PF3D7_1350900 <sup>α</sup>                                              |
|    | 28.7           | 3.69e-10       | PF3D7_1139300 <sup>α</sup>                                              |
|    | 26.4           | 9.57e-10       | PF3D7_0420300, PF3D7_0802100, PF3D7_1305200, PF3D7_1456000 <sup>α</sup> |
|    | 24.1           | 5.51e-9        | PF3D7_1222600 ( <b>AP2-G</b> ) <sup>α, β</sup>                          |
| <u>3' enriched motif</u>                                                            | <u>z-score</u> | <u>p-value</u> | <u>Potential Interacting Protein</u>                                    |
|   | 18.6           | 1.25e-6        | PF3D7_0417100 ( <b>PUF2</b> ) <sup>γ</sup>                              |
|  | 13.9           | 8.38e-6        | N/A                                                                     |

**Figure S7 related to Figure 5: Gametocyte-specific genes are enriched for potential regulatory motifs.** Genes identified as gametocyte-specific identified in 3D7 were analyzed for DNA sequence motif enrichment within their 5' and 3' UTRs (Elemento et al. 2007). Known *trans*-regulatory factors or RNA-binding proteins previously demonstrated to interact with each enriched motif are noted in red. <sup>α</sup> (Campbell et al. 2010); <sup>β</sup> (Kafsack et al. 2014); <sup>γ</sup> (Cui et al. 2002)

Campbell TL, De Silva EK, Olszewski KL, Elemento O, Llinas M. 2010. Identification and genome-wide prediction of DNA binding specificities for the ApiAP2 family of regulators from the malaria parasite. *PLoS Pathog* **6**: e1001165.

Cui L, Fan Q, Li J. 2002. The malaria parasite *Plasmodium falciparum* encodes members of the Puf RNA-binding protein family with conserved RNA binding activity. *Nucleic Acids Research* **30**: 4607-4617.

Elemento O, Slonim N, Tavazoie S. 2007. A universal framework for regulatory element discovery across all genomes and data types. *Mol Cell* **28**: 337-350.

Kafsack BF, Rovira-Graells N, Clark TG, Bancells C, Crowley VM, Campino SG, Williams AE, Drought LG, Kwiatkowski DP, Baker DA et al. 2014. A transcriptional switch underlies commitment to sexual development in malaria parasites. *Nature* **507**: 248-252.
