# Supplementary material for: Capturing in vivo RNA transcriptional dynamics from the malaria parasite Plasmodium falciparum
Source: HighWire-hosted journal article supplement (doi:10.1101/gr.217356.116), 2017-04-17
Supplement: Supplemental_Table_S1.xlsx [file Supplemental_Table_S1.xlsx]

## Sheet: Transcription
	DNA Microarray log2 ratios for each strain over time. Thiol-tagged RNA was separated from the total pool by streptavidin magnetic purification. RNA eluted from the beads is representative of 4-TU labeled mRNAs (Transcription) and unbound mRNAs represent non-thiol-tagged transcripts (Stabilization). Both populations were measured by two-color DNA microarray (Agilent Technologies, 60mer SurePrint p…
ClusterID	Old Gene ID||New GeneID||Product Description	3D7cam 0h	3D7cam 12h	3D7cam 24h	3D7cam 36h	3D7pfs16 0h	3D7pfs16 12h	3D7pfs16 24h	3D7pfs16 36h	F12cam 0h	F12cam 12h	F12cam 24h	F12cam 36h	F12pfs16 0h	F12pfs16 12h	F12pfs16 24h	F12pfs16 36h	3D7 0h FC	3D7 12h FC	3D7 24h FC	3D7 36h FC	F12 0h FC	F12 12h FC	F12 24h FC	F12 36h FC
1	PFL2235w||PF3D7_1246600||conserved Plasmodium protein, unknown function	0.728908	0.067097	-0.067097	-0.455415	-0.189739	0.133687	0.138076	-0.17037	0.277339	0.165205	-0.434867	-1.28217	0.424464	0.032515	-0.032515	-1.36916	-0.918647	0.06659	0.205173	0.285045	0.147125	-0.13269	0.402352	-0.086991
1	PFD1045c||PF3D7_0422200||erythrocyte membrane-associated antigen, putative	0.241446	0.023998	-0.478335	-0.023998	-0.056359	0.828052	0.276488	-0.110893	-0.157408	0.498702	0.010074	-0.010074	0.054172	0.264528	-0.088477	-0.074999	-0.297805	0.804054	0.754823	-0.086895	0.21158	-0.234174	-0.098551	-0.064925
1	PF13_0310||PF3D7_1358100||small subunit rRNA processing factor, putative	0.813131	0.175762	-0.209803	-0.494964	-0.312597	0.482093	0.360006	-0.175762	0.183367	0.637501	-0.183367	-0.975369	0.413283	0.456488	-0.2213	-1.18176	-1.12573	0.306331	0.569809	0.319202	0.229916	-0.181013	-0.037933	-0.206391
1	PF10_0021||PF3D7_1001700||Plasmodium exported protein (PHISTc), unknown function	-0.966212	0.681856	0.359024	0.759806	0.01297	-0.01297	-0.374979	-0.684769	1.44348	-0.020221	-0.045082	0.315094	1.30061	0.020221	-0.1251	-0.314196	0.979182	-0.694826	-0.734003	-1.44457	-0.142865	0.040442	-0.080018	-0.62929
1	MAL13P1.34||PF3D7_1306800||RED-like protein, putative	0.074314	0.290646	0.452391	0.351278	-0.074314	-0.347743	-0.40636	-0.293785	0.027504	0.011336	-0.106153	-0.06782	0.000404	0.040143	-0.000404	-0.528122	-0.148628	-0.638389	-0.858751	-0.645063	-0.0271	0.028807	0.105749	-0.460302
1	PFC0765c||PF3D7_0317400||conserved Plasmodium protein, unknown function	-0.032362	0.032362	1.07	0.451303	0.247471	-0.139428	-0.174327	-0.38376	-0.872529	-0.009951	0.937672	-0.01692	-1.03848	0.009951	0.828002	0.103752	0.279833	-0.17179	-1.24433	-0.835063	-0.165954	0.019902	-0.10967	0.120672
1	MAL13P1.194||PF3D7_1338700||conserved Plasmodium protein, unknown function	-0.437051	0.214796	1.48192	1.19285	0.142602	-0.489752	-0.142602	-0.474162	-1.01283	-0.280486	1.50113	0.526029	-1.17188	-0.18838	1.07956	0.18838	0.579653	-0.704548	-1.62452	-1.66701	-0.159045	0.092106	-0.421576	-0.337649
1	PFI0825w||PF3D7_0916900||conserved Plasmodium protein, unknown function	-0.407538	1.38573	-0.710654	1.28003	0.407538	0.623069	-0.583798	-0.501288	2.05836	-0.432002	-0.726889	0.92016	1.94582	0.263835	-0.507761	-0.263835	0.815076	-0.762661	0.126856	-1.78132	-0.112533	0.695837	0.219128	-1.18399
1	PF13_0159||PF3D7_1327600||nicotinic acid mononucleotide adenyltransferase	-0.193934	0.360647	-0.630839	0.574071	0.193934	-0.390324	-0.22579	0.222139	0.069559	-0.140808	-0.588969	1.29594	0.019909	-0.019909	-0.537902	0.802738	0.387868	-0.750971	0.405049	-0.351932	-0.04965	0.120899	0.051067	-0.493202
1	PFB0910w||PF3D7_0219900||Plasmodium exported protein, unknown function	-0.015597	2.21095	-0.020591	1.41938	0.335177	0.015597	-0.70667	-0.567657	0.812316	-0.886648	-1.46392	0.914573	0.490611	-0.490611	-1.35029	0.862869	0.350774	-2.19536	-0.686079	-1.98703	-0.321705	0.396037	0.113626	-0.051704
1	PFI0885w||PF3D7_0918100||cytochrome b5-like heme/steroid binding protein, putative	-0.161301	0.002149	0.628757	1.16936	-0.15432	0.077939	-0.002149	-0.642828	0.613167	-0.1758	-0.226217	0.547194	0.682285	-0.099979	-0.165646	0.099979	0.006981	0.07579	-0.630906	-1.81219	0.069118	0.075821	0.060571	-0.447215
1	PFI1200w||PF3D7_0924400||conserved Plasmodium protein, unknown function	-0.287658	0.276983	0.145996	0.720387	-0.155962	0.110241	-0.110241	-0.903623	0.053027	-0.263249	-0.053027	0.99261	0.264964	-0.596183	-0.109798	0.302804	0.131696	-0.166742	-0.256237	-1.62401	0.211937	-0.332934	-0.056771	-0.689806
1	PFI0710c||PF3D7_0914500||conserved Plasmodium protein, unknown function	-0.413332	-0.002074	0.809765	0.69996	0.002074	-0.693746	0.029483	-0.420084	-0.312667	-0.063989	1.00291	0.374323	-0.064585	-0.277153	0.758725	0.063989	0.415406	-0.691672	-0.780282	-1.12004	0.248082	-0.213164	-0.244187	-0.310334
1	PFI1010w||PF3D7_0920600||conserved Plasmodium protein, unknown function	-1.08231	0.941154	0.83934	1.2757	0.139884	-0.975217	-0.139884	-0.248015	-0.529682	-0.918196	0.506163	1.35343	-0.203778	-0.952142	0.203778	1.08195	1.2222	-1.91637	-0.979224	-1.52371	0.325904	-0.033946	-0.302385	-0.271484
1	PFI0970c||PF3D7_0919800||TLD domain containing protein	-0.301871	-9e-06	0.965769	1.07811	9e-06	-0.025826	0.250285	-0.051589	0.1087	-0.461058	0.502754	0.344412	-0.065047	-0.625773	0.065047	-0.108425	0.30188	-0.025817	-0.715484	-1.1297	-0.173747	-0.164715	-0.437707	-0.452837
1	PF08_0056||PF3D7_0818500||zinc finger protein, putative	-0.01077	0.784666	-0.050154	0.983623	-0.188453	0.01077	0.364406	-0.60127	0.831587	-0.133452	-0.619901	1.12112	1.01476	0.133452	-0.250317	-0.284612	-0.177683	-0.773896	0.41456	-1.58489	0.183169	0.266904	0.369584	-1.40573
1	PFE1355c||PF3D7_0527200||ubiquitin carboxyl-terminal hydrolase, putative	0.239244	-0.119721	0.393728	0.290613	-0.259632	-0.167561	-0.044758	0.044758	-0.314893	-0.048838	0.382234	0.162546	-0.390626	0.048838	0.592727	-0.091816	-0.498876	-0.04784	-0.438486	-0.245855	-0.075733	0.097676	0.210493	-0.254362
1	PFA0335w||PF3D7_0106800||Rab GTPase 5c	-0.810258	-0.38865	1.02966	0.439533	-0.304456	0.065333	0.430696	-0.065333	-0.893059	-0.141445	0.815065	0.034444	-1.25101	-0.030149	0.863096	0.030149	0.505802	0.453983	-0.598961	-0.504866	-0.357951	0.111296	0.048031	-0.004295
1	PF13_0011||PF3D7_1302100||gamete antigen 27/25	-0.21311	2.15897	0.77751	1.93127	-0.125932	-0.397373	0.125932	-1.82509	0.362548	-1.25987	-0.052676	1.15875	0.208938	-0.958972	-0.0444	0.0444	0.087178	-2.55634	-0.651578	-3.75636	-0.15361	0.300897	0.008276	-1.11435
1	PFC0910w||PF3D7_0320500||conserved Plasmodium protein, unknown function	0.114225	0.459371	0.467426	1.08861	-0.405635	-0.361294	-0.667376	-0.114225	-1.00578	0.088338	-0.292887	0.847777	-1.00805	0.139492	-0.088338	0.762486	-0.51986	-0.820665	-1.1348	-1.20283	-0.002261	0.051154	0.204549	-0.085291
1	MAL13P1.226||PF3D7_1345400||conserved Plasmodium protein, unknown function	0.13462	-0.280579	0.957401	0.606248	-0.196325	-0.13462	0.47601	-0.209282	-0.646964	-0.04677	0.990182	0.147079	-0.443883	0.04677	0.821932	-0.216385	-0.330945	0.145959	-0.481391	-0.81553	0.203081	0.09354	-0.16825	-0.363464
1	PFD1135c||PF3D7_0423900||probable protein, unknown function	-0.063113	1.35354	-0.377595	1.50134	0.063113	-0.60309	-0.65594	0.195749	0.584352	-0.638875	-1.43588	1.54447	0.443386	-0.443386	-1.27603	1.16339	0.126226	-1.95663	-0.278345	-1.3056	-0.140966	0.195489	0.159848	-0.38108
1	PFI1355w||PF3D7_0927600||conserved Plasmodium protein, unknown function	-0.019172	1.07682	1.77092	2.15963	-0.41681	-0.801486	0.019172	-0.599001	-0.911674	-0.606005	0.818636	1.03692	-0.715039	-0.784517	0.606005	0.655941	-0.397638	-1.87831	-1.75175	-2.75863	0.196635	-0.178512	-0.212631	-0.380978
1	PF11_0160||PF3D7_1115200||SET domain protein, putative	-0.620627	0.254849	0.302163	0.499387	-0.086681	0.086681	-0.229288	-0.298656	-0.077408	-0.077654	0.077408	0.343992	0.220707	-0.322759	0.176047	-0.202625	0.533946	-0.168168	-0.531451	-0.798043	0.298115	-0.245105	0.098639	-0.546617
1	PFL0890c||PF3D7_1218400||triose or hexose phosphate/phosphate translocator, putative	0.065501	0.871372	0.809301	0.681555	-0.275243	-0.100498	-0.065501	-0.566283	0.209337	-0.22168	-0.217156	-0.064582	0.093952	0.07111	0.064582	-0.159764	-0.340744	-0.97187	-0.874802	-1.24784	-0.115385	0.29279	0.281738	-0.095182
1	PFC0281w||PF3D7_0306600||conserved Plasmodium protein, unknown function	-0.127374	0.34206	1.45477	0.848926	-0.171675	-0.617271	-0.054578	0.054578	-0.285946	-0.081438	0.72876	0.257716	-0.068945	-0.061522	1.18279	0.061522	-0.044301	-0.959331	-1.50935	-0.794348	0.217001	0.019916	0.454029	-0.196194
1	PF11_0073||PF3D7_1106200||conserved Plasmodium protein, unknown function	0.120814	-0.201973	1.02152	0.041527	-0.411444	-0.405091	0.262836	-0.041527	-0.586436	0.444691	1.10169	-0.236833	-0.783423	0.121924	1.09449	-0.121924	-0.532258	-0.203118	-0.75868	-0.083054	-0.196987	-0.322767	-0.007202	0.114909
1	PF14_0415||PF3D7_1443700||dephospho-CoA kinase, putative	-0.141844	0.628386	1.91423	1.24886	-0.323412	-0.941871	-0.301702	0.141844	-1.53296	-0.425762	1.08989	0.425762	-1.6765	-0.665818	0.853447	0.692965	-0.181568	-1.57026	-2.21593	-1.10701	-0.143546	-0.240056	-0.236443	0.267203
1	PF14_0778-a||PF3D7_1411100||conserved Plasmodium membrane protein, unknown function	-0.463504	0.871448	0.384189	0.877217	-0.473033	-0.149742	0.149742	-0.628397	0.07964	-0.105544	-0.07964	1.50792	-0.23742	0.169793	-0.156448	1.22176	-0.009529	-1.02119	-0.234447	-1.50561	-0.31706	0.275337	-0.076808	-0.286162
1	PFF0635w||PF3D7_0613100||conserved Plasmodium protein, unknown function	0.235357	1.29798	1.51148	1.21787	-0.235357	-0.441084	-0.296102	-0.333272	-0.286366	-0.048016	-0.06168	0.640142	-0.794924	0.057735	0.048016	0.592468	-0.470714	-1.73906	-1.80758	-1.55114	-0.508558	0.105751	0.109696	-0.047674
1	PF14_0554||PF3D7_1458100||conserved Plasmodium protein, unknown function	-0.748045	-0.19355	0.567734	0.224729	-0.691329	0.19355	0.542842	-1.04635	0.488531	-0.019563	0.176185	-0.271313	0.019563	-0.042934	0.128018	-0.352321	0.056716	0.3871	-0.024892	-1.27108	-0.468968	-0.023371	-0.048167	-0.081008
1	MAL13P1.330||PF3D7_1365800||conserved Plasmodium protein, unknown function	-0.058482	1.29456	0.850559	1.50387	0.058482	-0.49908	-0.600561	-0.483615	0.098013	-0.205263	-0.352888	1.02862	-0.059648	0.059648	-0.158416	0.946069	0.116964	-1.79364	-1.45112	-1.98749	-0.157661	0.264911	0.194472	-0.082548
1	PFL2465c||PF3D7_1251300||thymidylate kinase	-0.136161	0.734408	1.72453	1.06628	-0.353279	-0.748145	-0.698056	0.136161	-0.581012	-0.507698	0.885854	0.438001	-0.681098	-0.241211	0.925722	0.241211	-0.217118	-1.48255	-2.42258	-0.930115	-0.100086	0.266487	0.039868	-0.19679
1	PF11_0273-a||PF3D7_1126300||DnaJ protein, putative	0.483864	1.32285	1.5545	1.31403	-0.541843	-0.483864	-0.513077	-0.802458	-0.250831	0.159674	0.04154	-0.005073	-0.37553	0.005073	0.221277	-0.305062	-1.02571	-1.80672	-2.06758	-2.11648	-0.124699	-0.154601	0.179737	-0.299989
1	PFI1468c||PF3D7_0930100||conserved Plasmodium protein, unknown function	-0.400415	0.36891	0.644945	0.843059	-0.125661	-0.045172	0.045172	-0.157408	-0.622563	-0.197206	0.197206	1.21912	-0.24599	-0.253693	0.476535	0.860821	0.274754	-0.414082	-0.599773	-1.00047	0.376573	-0.056487	0.279329	-0.3583
1	MAL13P1.17||PF3D7_1303600||conserved Plasmodium protein, unknown function	0.358467	1.24697	1.09042	1.10767	-0.573654	-0.418906	-0.358467	-0.801422	-0.088291	-0.001503	0.001503	0.602098	-0.342362	0.125602	-0.133105	0.530608	-0.932121	-1.66587	-1.44889	-1.90909	-0.254071	0.127105	-0.134608	-0.07149
1	PF14_0049||PF3D7_1405200||sybindin-like protein, putative	0.474512	0.724807	1.15041	0.537609	-0.899869	-0.792675	-0.543115	-0.474512	-0.269594	0.327279	0.470157	-0.075321	-0.28997	0.075321	0.521838	-0.292906	-1.37438	-1.51748	-1.69352	-1.01212	-0.020376	-0.251958	0.051681	-0.217585
1	PFD1120c||PF3D7_0423700||early transcribed membrane protein 4	-0.296837	3.03889	2.29792	2.85851	-0.119303	0.119303	-0.168248	-0.879614	-0.369178	-1.00561	0.797744	1.17614	-0.288	-0.945838	0.453706	0.288	0.177534	-2.91959	-2.46616	-3.73812	0.081178	0.059775	-0.344038	-0.888138
1	PF14_0555||PF3D7_1458200||conserved Plasmodium protein, unknown function	-0.455016	0.389794	0.959575	0.629392	-0.693351	-0.692818	0.330825	-0.330825	0.204376	-0.334259	0.337135	-0.065285	-0.027217	-0.276283	0.302623	0.027217	-0.238335	-1.08261	-0.62875	-0.960217	-0.231593	0.057976	-0.034512	0.092502
1	MAL13P1.329||PF3D7_1365700||conserved Plasmodium membrane protein, unknown function	-0.01497	0.904951	0.833708	1.36954	-0.342326	0.01497	-0.087743	-0.418433	-0.081048	-0.160105	0.150945	1.20944	0.004521	-0.004521	-0.05751	1.04686	-0.327356	-0.889981	-0.921451	-1.78798	0.085569	0.155584	-0.208455	-0.162581
1	PF14_0485||PF3D7_1451000||conserved Plasmodium protein, unknown function	0.20734	-0.025157	0.952837	0.763299	-0.788154	-0.052463	-0.408224	0.025157	-1.30636	0.028577	0.072565	-0.316266	-0.008916	0.008916	0.110021	-0.83665	-0.995494	-0.027306	-1.36106	-0.738142	1.29745	-0.019661	0.037456	-0.520384
1	MAL13P1.269||PF3D7_1353000||tryptophan-rich antigen	-0.667233	0.061964	0.281272	0.563562	-0.708067	0.103642	-0.061964	-0.658069	0.511272	0.00631	0.053549	-0.145598	0.487958	-0.00631	-0.11517	-0.765766	-0.040834	0.041678	-0.343236	-1.22163	-0.023314	-0.01262	-0.168719	-0.620168
1	PF10_0080||PF3D7_1008200||endonuclease, putative	-0.43995	0.844755	1.92971	1.59522	-0.339521	-0.756895	-0.481154	0.339521	-1.16596	-0.715357	0.798179	0.821399	-1.13568	-0.757594	0.715357	0.759125	0.100429	-1.60165	-2.41086	-1.2557	0.030285	-0.042237	-0.082822	-0.062274
1	PFB0194w||PF3D7_0204200||conserved Plasmodium protein, unknown function	0.124076	1.02809	0.13419	1.358	-0.762302	-0.124076	-0.139295	-1.25851	0.065277	-0.082923	-0.533249	1.00778	0.203571	-0.065277	-0.388707	0.353497	-0.886378	-1.15217	-0.273485	-2.61651	0.138294	0.017646	0.144542	-0.654284
1	PFB0145c||PF3D7_0203000||conserved Plasmodium protein, unknown function	-1.08671	0.4294	0.794333	1.61268	-0.822955	-0.829867	-0.008437	0.008437	-0.665265	-0.747036	0.021525	1.19056	0.084017	-1.21593	-0.021525	0.690227	0.263753	-1.25927	-0.80277	-1.60425	0.749282	-0.468895	-0.04305	-0.500328
1	PFF1130c||PF3D7_0623500||superoxide dismutase	0.139295	1.16089	1.55139	0.652001	-0.534876	-0.492217	-0.610169	-0.139295	-0.057002	-0.020674	1.01575	0.020674	-0.249187	-0.069391	0.948467	0.091471	-0.674171	-1.65311	-2.16155	-0.791296	-0.192185	-0.048717	-0.06728	0.070797
1	PF11_0185||PF3D7_1117900||conserved Plasmodium protein, unknown function	-0.175129	0.456108	1.04085	0.890239	-0.403192	-0.422149	0.020205	-0.020205	-0.366809	-0.046296	0.344121	0.288328	-0.32738	-0.446173	0.425646	0.046296	-0.228063	-0.878257	-1.02065	-0.910444	0.039429	-0.399877	0.081525	-0.242032
1	PFL0400w||PF3D7_1208000||apicoplast ribosomal protein L29 precursor, putative	0.066454	-0.066454	1.09343	0.1392	-0.733993	-0.96566	-0.590612	0.068957	-0.398002	-0.082865	0.765702	-0.232414	-0.51341	0.280647	0.95539	0.082865	-0.800447	-0.899206	-1.68404	-0.070243	-0.115408	0.363512	0.189688	0.315279
1	PFB0905c||PF3D7_0219800||Plasmodium exported protein (PHISTc), unknown function	-0.831278	0.677041	0.127825	0.763818	-0.645523	-0.127825	0.130963	-0.731783	0.379455	-0.461847	-0.379455	1.0399	0.612958	-0.545818	-0.537202	0.530079	0.185755	-0.804866	0.003138	-1.4956	0.233503	-0.083971	-0.157747	-0.509817
1	PFI1585c||PF3D7_0932600||mitochondrial ribosomal protein S6 precursor, putative	0.203336	0.503609	2.16653	1.00964	-0.638963	-0.655402	-0.203336	-0.248362	-0.772598	0.049757	1.42231	-0.052463	-1.10542	-0.049757	1.52882	0.060232	-0.842299	-1.15901	-2.36987	-1.258	-0.332825	-0.099514	0.106508	0.112695
1	PF08TR005||PF3D7_0829900||product unspecified	-0.364491	0.835056	0.499308	1.40848	-0.266729	-0.537536	-0.614733	0.266729	-0.243437	-0.040583	0.410971	0.077761	-0.301998	0.225783	0.040583	-0.415192	0.097762	-1.37259	-1.11404	-1.14176	-0.058561	0.266366	-0.370388	-0.492953
1	PFI1530c||PF3D7_0931500||conserved Plasmodium protein, unknown function	-0.621215	0.277907	0.794055	1.11316	-0.572421	-0.173667	0.173667	-0.200483	-0.62704	-0.266851	0.475056	0.694278	-1.0133	-0.282492	0.266851	0.902185	0.048794	-0.451574	-0.620388	-1.31364	-0.386259	-0.015641	-0.208205	0.207907
1	MAL13P1.168||PF3D7_1331600||protein tyrosine phosphatase, putative	-1.0505	0.157233	1.75476	1.13386	-0.511604	-0.290387	0.087518	-0.087518	-1.56659	-0.83526	1.24905	0.56184	-1.90831	-0.56184	1.34161	0.751132	0.538895	-0.44762	-1.66725	-1.22138	-0.341718	0.27342	0.092561	0.189292
1	PFI0790w||PF3D7_0916100||thioredoxin reductase 3	0.210343	1.60527	1.71569	1.27743	-0.503617	-0.688967	-0.210343	-0.215851	-0.195943	-0.495236	0.449391	0.372914	-0.566141	-0.26337	0.195943	0.677821	-0.71396	-2.29423	-1.92604	-1.49328	-0.370198	0.231866	-0.253448	0.304907
1	PFC0385c||PF3D7_0309200||serine/threonine protein kinase, putative	0.113354	0.240611	0.932603	0.75781	-0.793384	-0.258879	-0.113354	-0.253377	-0.318714	-0.051387	0.769247	0.134034	-0.111106	0.051387	0.68935	-0.255755	-0.906738	-0.49949	-1.04596	-1.01119	0.207608	0.102774	-0.079897	-0.389789
1	PF14_0577||PF3D7_1460500||conserved Plasmodium protein, unknown function	0.129841	0.47544	1.38582	1.02397	-0.445052	-0.435775	-0.129841	-0.23597	-0.404268	-0.040471	0.833788	0.343756	-0.236533	-0.181079	0.726759	0.040471	-0.574893	-0.911215	-1.51566	-1.25994	0.167735	-0.140608	-0.107029	-0.303285
1	MAL13P1.205||PF3D7_1340700||Rab GTPase 11b	-0.033476	0.846737	1.97752	1.05471	-0.583367	-1.03876	-0.715239	0.033476	-0.65234	-0.523181	1.20143	0.361333	-0.79648	-0.358364	1.0636	0.358364	-0.549891	-1.8855	-2.69276	-1.02123	-0.14414	0.164817	-0.137832	-0.002969
1	PF11_0217||PF3D7_1121000||conserved Plasmodium membrane protein, unknown function	0.221798	0.765301	1.73466	1.18222	-0.494594	-0.833243	-0.905362	-0.221798	-0.424329	-0.3526	0.59083	0.447916	-0.878533	-0.359016	0.3526	0.5663	-0.716392	-1.59854	-2.64002	-1.40401	-0.454204	-0.006416	-0.23823	0.118384
1	PF10_0296||PF3D7_1030300||conserved Plasmodium protein, unknown function	0.312812	1.60927	0.517109	2.03642	-0.79222	-0.475594	-0.312812	-1.10062	0.436358	-0.646095	-0.890801	1.50944	1.061	-0.436358	-0.795246	0.934857	-1.10503	-2.08486	-0.829921	-3.13704	0.624646	0.209737	0.095555	-0.57458
1	PFL0505c||PF3D7_1210100||syntaxin, Qa-SNARE family	0.129132	0.726602	1.05123	1.19574	-0.811952	-0.994359	-0.129132	-0.597051	-1.00164	-0.01998	0.01998	0.40461	-1.07387	-0.288482	0.069465	0.305496	-0.941084	-1.72096	-1.18037	-1.79279	-0.07224	-0.268502	0.049485	-0.099114
1	PFD0775c||PF3D7_0416000||RNA binding protein, putative	0.283536	0.295225	0.78883	0.61853	-1.11912	-0.7089	-0.283536	-0.689617	-0.530452	-0.251744	0.347286	0.336972	-0.443343	-0.107113	0.107113	0.131997	-1.40266	-1.00412	-1.07237	-1.30815	0.087109	0.144631	-0.240173	-0.204975
1	PF11_0266a||PF3D7_1125600||conserved Plasmodium protein, unknown function	-1.325	0.431625	0.954373	0.899367	-0.8244	-1.2514	0.760379	-0.431625	-0.672072	-0.714013	0.527905	1.16418	-0.763778	-0.51369	0.51369	1.08788	0.5006	-1.68303	-0.193994	-1.33099	-0.091706	0.200323	-0.014215	-0.076298
1	PF14_0647||PF3D7_1467900||conserved Plasmodium protein, unknown function	-0.115307	0.294731	0.228295	1.20227	-1.05811	-0.459118	0.115307	-0.910936	-0.048449	0.025662	-0.025662	1.3826	0.757917	-0.188306	-0.046382	0.730428	-0.942804	-0.753849	-0.112988	-2.11321	0.806366	-0.213968	-0.02072	-0.652168
1	PF14_0029a||PF3D7_1402900||conserved Plasmodium protein, unknown function	0.194609	1.28509	0.937705	1.2045	-0.966907	-0.403106	-0.194609	-0.50505	-0.481141	-0.093516	0.080882	1.26865	0.036853	-0.429499	-0.036853	0.894208	-1.16152	-1.68819	-1.13231	-1.70955	0.517994	-0.335983	-0.117735	-0.374439
1	PFI0375w||PF3D7_0907800||apicoplast ribosomal protein L35 precursor, putative	0.031656	1.06126	2.16567	1.56221	-0.86706	-0.575631	-0.240963	-0.031656	-0.118437	-0.053859	0.537441	0.482111	-0.45888	-0.065301	0.661839	0.053859	-0.898716	-1.63689	-2.40663	-1.59386	-0.340443	-0.011442	0.124398	-0.428252
1	PFF1475c||PF3D7_0630400||conserved Plasmodium protein, unknown function	-0.350988	1.71958	2.40231	2.46221	-0.435757	-1.02582	-0.39157	0.350988	-0.768506	-0.445877	0.463013	1.73419	-0.831642	-0.230641	0.230641	2.01017	-0.084769	-2.74541	-2.79388	-2.11122	-0.063136	0.215236	-0.232372	0.275982
1	MAL8P1.82||PF3D7_0815800||vacuolar sorting protein VPS9, putative	0.175575	0.483778	1.13592	1.38545	-0.897318	-0.476498	-0.175575	-0.393187	-0.77921	-0.028014	0.185448	0.485897	-0.346757	-0.181423	0.244945	0.028014	-1.07289	-0.960276	-1.31149	-1.77864	0.432453	-0.153409	0.059497	-0.457883
1	PF10_0246a||PF3D7_1025200||conserved Plasmodium protein, unknown function	-0.050032	0.753151	1.37017	1.02797	-0.474228	-0.478503	-0.251592	0.050032	-0.657387	-0.326046	0.296212	0.200663	-0.944914	-0.200663	0.435693	0.393654	-0.424196	-1.23165	-1.62176	-0.977935	-0.287527	0.125383	0.139481	0.192991
1	MAL8P1.29||PF3D7_0825000||conserved Plasmodium protein, unknown function	-0.031935	0.438415	1.20804	1.10709	-0.990353	-1.10624	0.031935	-0.459506	-0.75731	-0.048886	0.821972	0.268801	-0.380784	-0.345849	0.766487	0.048886	-0.958418	-1.54466	-1.1761	-1.5666	0.376526	-0.296963	-0.055485	-0.219915
1	PFD0675w||PF3D7_0413800||apicoplast ribosomal protein L10 precursor, putative	-0.69478	0.227321	1.65406	0.651565	-0.890902	-1.31549	0.066979	-0.066979	-0.641216	-0.082878	1.15945	0.314245	-1.05737	-0.050272	1.15769	0.050272	-0.196122	-1.54281	-1.58708	-0.718544	-0.416154	0.032606	-0.001756	-0.263973
1	PF11_0287||PF3D7_1127600||CRAL/TRIO domain-containing protein, putative	0.289523	2.4773	1.72753	2.61573	-0.895678	-0.81848	-0.532375	-0.289523	-0.311122	-0.3085	0.073674	1.60999	-0.424658	-0.073674	0.146265	1.76567	-1.1852	-3.29578	-2.25991	-2.90525	-0.113536	0.234826	0.072591	0.155672
1	PFI0385c||PF3D7_0908000||P1 nuclease, putative	0.026395	1.85363	2.05134	2.21518	-0.683524	-0.306886	-0.444116	-0.026395	-0.529751	-0.336415	0.246965	0.764753	-0.507183	-0.246965	0.296366	0.892167	-0.709919	-2.16051	-2.49545	-2.24157	0.022568	0.08945	0.049401	0.127414
1	PF14_0409||PF3D7_1443100||conserved Plasmodium protein, unknown function	0.225825	0.407214	1.55425	0.970794	-0.906119	-0.737356	-0.603695	-0.225825	-0.571974	0.031801	0.798331	0.251212	-0.19182	-0.031801	0.771487	-0.317711	-1.13194	-1.14457	-2.15795	-1.19662	0.380154	-0.063602	-0.026844	-0.568923
1	PFF0415c||PF3D7_0608400||conserved Plasmodium protein, unknown function	0.287224	0.147697	1.29118	0.684751	-1.52116	-1.19207	-0.147697	-0.60607	-0.039356	0.039356	0.76028	-0.139987	-0.56533	0.218678	1.04881	-0.269589	-1.80838	-1.33977	-1.43888	-1.29082	-0.525974	0.179322	0.288528	-0.129602
1	PF11_0424||PF3D7_1141300||conserved Plasmodium protein, unknown function	-0.13459	0.268049	1.90314	1.67498	-0.894215	-0.904647	0.133757	-0.133757	-0.527694	-0.566758	1.1453	0.806813	-0.230591	-0.5649	0.931364	0.230591	-0.759625	-1.1727	-1.76938	-1.80874	0.297103	0.001858	-0.213939	-0.576222
1	PFA0555c||PF3D7_0111500||UMP-CMP kinase, putative	-0.145906	1.30144	1.94564	1.92684	-1.01982	-1.05348	-0.021389	0.021389	-1.19703	-0.651292	0.521233	1.23079	-0.776439	-0.521233	0.841839	1.28682	-0.873914	-2.35492	-1.96703	-1.90545	0.420594	0.130059	0.320606	0.056025
1	PF11_0209||PF3D7_1120200||conserved Plasmodium protein, unknown function	-0.653274	0.341143	0.820747	0.833317	-1.62085	-0.341143	0.426752	-1.29474	-0.407035	-0.504147	0.17902	0.564641	-0.688136	-0.118775	0.118775	0.571245	-0.967581	-0.682286	-0.393995	-2.12805	-0.281101	0.385372	-0.060245	0.006604
1	PFC0855w||PF3D7_0319300||ubiquitin conjugating enzyme, putative	-0.20561	-0.007267	0.262365	-0.560213	0.165278	0.007267	-0.593847	0.04814	-0.039772	0.039772	0.260371	-0.926497	-0.283963	0.354915	0.260309	-0.537989	0.370888	0.014534	-0.856212	0.608353	-0.244191	0.315143	-6.2e-05	0.388508
1	PFI1115c||PF3D7_0922700||pre-mRNA splicing factor, putative	0.356999	-0.070506	0.070506	-0.363542	0.258345	-0.226479	0.829829	-0.643355	0.263462	0.182416	-0.196294	-1.08754	0.00782	0.226649	-0.00782	-0.757307	-0.098654	-0.155973	0.759323	-0.279813	-0.255642	0.044233	0.188474	0.330234
1	MAL7P1.129||PF3D7_0724100||conserved Plasmodium protein, unknown function	0.38112	-0.421982	0.257433	-0.340445	-0.448904	-0.114102	0.589951	0.114102	-0.34995	0.05524	0.290292	-0.563921	0.122318	-0.05524	0.4006	-1.2541	-0.830024	0.30788	0.332518	0.454547	0.472268	-0.11048	0.110308	-0.690175
1	PFE1330c||PF3D7_0526700||conserved Plasmodium protein, unknown function	0.364992	-0.049014	1.14998	0.316959	-0.020437	-0.614937	-0.120057	0.020437	-0.423895	0.421351	1.03184	-0.293194	-0.288596	0.288596	1.18437	-0.288691	-0.385429	-0.565923	-1.27004	-0.296522	0.135299	-0.132755	0.152529	0.004503
1	MAL13P1.200||PF3D7_1339500||mitochondrial ribosomal protein L49 precursor, putative	0.580075	0.068816	0.504335	-0.329516	-0.111734	-0.599207	0.071079	-0.068816	-0.345125	0.380145	0.345125	-0.997313	-0.703054	0.591746	0.702356	-0.701017	-0.691809	-0.668023	-0.433256	0.2607	-0.357929	0.211601	0.357231	0.296296
1	PF08_0061||PF3D7_0817200||conserved Plasmodium protein, unknown function	0.025794	0.650698	0.726725	0.88459	-0.025794	-0.443669	-0.288988	-0.210572	-0.001841	-0.042353	0.001841	0.24076	-0.130345	-0.290994	0.038111	0.115866	-0.051588	-1.09437	-1.01571	-1.09516	-0.128504	-0.248641	0.03627	-0.124894
1	PFF0980w||PF3D7_0620100||conserved Plasmodium protein, unknown function	0.026102	0.000937	0.9156	-0.000937	-0.434759	-0.574626	0.530437	-0.111313	0.012837	-0.012837	0.627318	-0.246521	-0.068727	0.076341	0.84401	-0.245675	-0.460861	-0.575563	-0.385163	-0.110376	-0.081564	0.089178	0.216692	0.000846
1	PFL1590c||PF3D7_1233000||elongation factor G, putative	0.079564	0.112362	0.861368	0.270231	-0.337964	-0.81397	-0.079564	-0.084957	-0.290056	0.143563	0.550196	-0.359361	0.090969	-0.090969	1.06696	-0.187967	-0.417528	-0.926332	-0.940932	-0.355188	0.381025	-0.234532	0.516761	0.171394
1	PF07_0010||PF3D7_0703000||conserved Plasmodium protein, unknown function	0.414799	0.200492	0.639837	-0.083561	-0.319883	-0.466375	0.083561	-0.447661	-0.128469	0.163657	0.631278	-0.410872	-0.176247	0.128469	0.452014	-0.48741	-0.734682	-0.666867	-0.556276	-0.3641	-0.047778	-0.035188	-0.179264	-0.076538
1	PF14_0604||PF3D7_1463500||conserved Plasmodium protein, unknown function	-0.298783	0.970055	0.231428	0.472491	-0.231428	-0.690356	0.294019	-0.594863	1.3715	-0.01277	0.01277	0.065498	1.0344	-0.118426	-0.150109	-0.277535	0.067355	-1.66041	0.062591	-1.06735	-0.337101	-0.105656	-0.162879	-0.343033
1	PFA0450c||PF3D7_0109200||mRNA cleavage factor-like protein, putative	0.110736	0.100747	1.13065	0.222602	-0.293947	-0.143707	-0.318347	-0.100747	-0.33789	0.34453	0.579232	-0.442357	-0.655679	0.266351	1.06557	-0.266351	-0.404683	-0.244454	-1.449	-0.323349	-0.317789	-0.078179	0.486335	0.176006
1	PFC0126c||PF3D7_0302700||PFMNL-1 CISD1-like iron-sulfur protein, putative	-0.097567	0.123289	1.11184	0.183407	-0.431435	-0.696237	-0.381901	0.097567	-0.833799	0.046417	0.488686	-0.340896	-0.925883	0.20208	0.549343	-0.046417	-0.333868	-0.819526	-1.49375	-0.08584	-0.092084	0.155663	0.060657	0.294479
1	PF14TR008||PF3D7_1478900||product unspecified	0.010133	0.613024	0.574342	-0.010133	-0.280347	-0.622158	-0.088446	0.706349	0.564971	0.718454	-0.899782	-0.853905	0.166592	0.897943	-0.166592	-1.84937	-0.29048	-1.23518	-0.662788	0.716482	-0.398379	0.179489	0.73319	-0.995464
1	MAL13P1.50||PF3D7_1310500||conserved Plasmodium protein, unknown function	0.232409	0.471916	0.443643	-0.232409	-0.465702	-0.544728	0.594573	-0.491443	0.014469	0.091422	0.007383	-0.98413	-0.579655	0.431038	-0.007383	-0.883882	-0.698111	-1.01664	0.15093	-0.259034	-0.594124	0.339616	-0.014766	0.100248
1	PFL1583c||PF3D7_1232800||conserved Plasmodium protein, unknown function	0.284321	0.365344	0.420817	0.029679	-0.50262	-0.737919	-0.029679	-0.168632	-0.319358	0.489992	0.232398	-0.595092	-0.618643	0.443418	0.348722	-0.232398	-0.786941	-1.10326	-0.450496	-0.198311	-0.299285	-0.046574	0.116324	0.362694
1	PF08_0085||PF3D7_0812600||ubiquitin conjugating enzyme, putative	-0.442033	0.37103	0.561693	-0.178313	-0.611191	0.178313	0.326468	-0.791809	0.181003	-0.123403	0.58337	-0.3947	0.055664	-0.055664	0.542884	-0.281088	-0.169158	-0.192717	-0.235225	-0.613496	-0.125339	0.067739	-0.040486	0.113612
1	MAL13P1.217||PF3D7_1343500||conserved Plasmodium protein, unknown function	0.06813	-0.06813	1.50696	0.707628	-0.265372	-0.823193	-0.158692	0.211188	-0.776452	0.114292	1.27699	0.022763	-0.978787	-0.167826	1.21833	-0.022763	-0.333502	-0.755063	-1.66565	-0.49644	-0.202335	-0.282118	-0.058663	-0.045526
1	PFL1195w||PF3D7_1224800||conserved Plasmodium protein, unknown function	-0.218381	0.494101	0.904019	0.813107	-0.549248	-0.348443	0.218381	-0.489465	0.091299	-0.237905	0.339873	0.070421	-0.092809	-0.131593	0.399065	-0.070421	-0.330867	-0.842544	-0.685638	-1.30257	-0.184108	0.106312	0.059192	-0.140842
1	PFI0280c-a||PF3D7_0905700||autophagocytosis associated protein, putative	0.354132	0.411272	0.892359	0.132236	-0.446314	-0.132236	-0.177021	-0.323746	-0.207679	0.258753	0.207679	-0.580129	-0.800273	0.252626	0.358397	-0.4017	-0.800446	-0.543508	-1.06938	-0.455982	-0.592594	-0.006127	0.150718	0.178429
1	PF10_0051||PF3D7_1004800||ADP/ATP carrier protein, putative	0.773197	0.405743	1.18766	0.245425	-0.385489	-0.314021	-0.358429	-0.245425	-0.966388	0.349334	0.701253	-0.446935	-1.08591	0.389319	0.566965	-0.349334	-1.15869	-0.719764	-1.54609	-0.49085	-0.119525	0.039985	-0.134288	0.097601
1	PF14_0071||PF3D7_1407400||conserved Plasmodium protein, unknown function	0.275627	0.129256	0.487531	0.289516	-0.659014	-0.713018	-0.129256	-0.840147	0.040095	0.214013	-0.146577	-0.566005	-0.040095	0.230407	0.117277	-0.629593	-0.934641	-0.842274	-0.616787	-1.12966	-0.08019	0.016394	0.263854	-0.063588
1	PFE0740c||PF3D7_0514800||kinase, putative	0.500031	0.77811	0.894163	0.028976	-0.313081	-0.189742	-0.028976	-0.262229	-0.068091	0.269044	0.356169	-0.39658	-0.305765	0.068091	0.380095	-0.27568	-0.813112	-0.967852	-0.923139	-0.291205	-0.237674	-0.200953	0.023926	0.1209
1	PF11_0440||PF3D7_1142800||conserved Plasmodium protein, unknown function	0.198574	-0.022603	0.948271	0.38779	-0.736309	-0.721109	-0.022736	0.022603	-0.296762	0.248698	0.778124	-0.288785	-0.343372	0.238743	1.03367	-0.238743	-0.934883	-0.698506	-0.971007	-0.365187	-0.04661	-0.009955	0.255545	0.050042
1	PFC0416w||PF3D7_0310000||conserved Plasmodium protein, unknown function	0.116706	0.037754	1.41287	0.717046	-0.83186	-0.95032	-0.037754	-0.344442	-0.052221	0.058032	1.02769	-0.114768	-0.233374	0.052221	1.32329	-0.100972	-0.948566	-0.988074	-1.45062	-1.06149	-0.181153	-0.005811	0.295598	0.013796
1	PF11_0130||PF3D7_1112400||conserved Plasmodium protein, unknown function	0.086519	0.010978	1.49424	0.161453	-0.900935	-0.663774	-0.010978	-0.167085	-0.795958	0.36914	0.728417	-0.26987	-1.29975	0.17227	1.31303	-0.17227	-0.987454	-0.674752	-1.50522	-0.328538	-0.503792	-0.19687	0.584608	0.0976
1	PFL2365w||PF3D7_1249300||protein phosphatase, putative	0.619903	0.140194	1.2482	0.444786	-0.570135	-0.384998	-0.140194	-0.5135	-0.247599	0.047775	0.365789	-0.403874	0.02787	-0.02787	0.592606	-0.673076	-1.19004	-0.525192	-1.38839	-0.958286	0.275469	-0.075645	0.226817	-0.269202
1	MAL13P1.251||PF3D7_1349900||conserved Plasmodium protein, unknown function	0.167568	-0.130024	0.844485	-0.010043	-0.74313	-0.937417	0.13918	0.010043	-0.036349	0.036349	0.691287	-0.075295	-0.377246	0.089308	0.636285	-0.087632	-0.910698	-0.807393	-0.705305	0.020086	-0.340897	0.052959	-0.055002	-0.012337
1	PFE0345c||PF3D7_0507000||conserved Plasmodium protein, unknown function	0.183925	0.208873	1.11546	0.609736	-0.92754	-1.19467	-0.183925	-0.400194	-0.620667	-0.018278	0.270017	0.018278	-0.838685	-0.166478	0.435047	0.040639	-1.11146	-1.40355	-1.29938	-1.00993	-0.218018	-0.1482	0.16503	0.022361
1	PF14_0237||PF3D7_1425700||conserved Plasmodium protein, unknown function	-0.225782	0.132398	0.757922	0.289007	-1.09061	-0.132398	0.215375	-1.05738	-0.113215	0.162967	0.4655	-0.279449	-0.362195	0.113215	0.524513	-0.218695	-0.864825	-0.264796	-0.542547	-1.34639	-0.24898	-0.049752	0.059013	0.060754
1	MAL8P1.201||PF3D7_0805500||conserved Plasmodium protein, unknown function	-0.496989	0.566784	0.51018	0.515284	-1.18313	-0.816197	0.496989	-1.46826	0.253275	-0.432922	0.019945	0.408148	-0.019945	-0.462127	-0.282203	0.094914	-0.686139	-1.38298	-0.013191	-1.98354	-0.27322	-0.029205	-0.302148	-0.313234
1	PF14TR010||PF3D7_1478900||product unspecified	-0.184317	0.142311	0.141072	-0.117538	-1.24387	-0.915084	0.117538	0.946098	0.11887	0.41095	-0.202645	-1.08044	0.375086	1.02896	-0.11887	-0.983831	-1.05955	-1.0574	-0.023534	1.06364	0.256216	0.61801	0.083775	0.096612
1	PF14TR009||PF3D7_1478900||product unspecified	-0.064783	0.273978	0.064783	0.09399	-1.57002	-1.62073	-0.755065	0.412643	0.127544	0.385889	-0.144773	-1.06706	0.45275	1.06198	-0.127544	-1.1101	-1.50523	-1.89471	-0.819848	0.318653	0.325206	0.676094	0.017229	-0.043038
1	PFA0400c||PF3D7_0108000||beta3 proteasome subunit, putative	0.20875	0.238392	1.09501	0.291467	-1.454	-0.880112	-0.20875	-0.871555	-0.714122	0.289265	0.823993	-0.334057	-0.972334	0.323819	0.985495	-0.289265	-1.66275	-1.1185	-1.30376	-1.16302	-0.258212	0.034554	0.161502	0.044792
1	PFE0290c||PF3D7_0505900||conserved Plasmodium protein, unknown function	0.337885	0.305497	0.905525	-0.305497	-1.30863	-0.434586	1.02701	-0.921574	-0.252738	0.265346	0.274357	-1.15506	-0.758716	0.252738	0.590516	-0.982083	-1.64651	-0.740083	0.121485	-0.616077	-0.505978	-0.012608	0.316159	0.172978
1	PFE0055c||PF3D7_0501100||heat shock protein 40, type II	0.246659	2.13202	-0.263262	0.953499	0.254946	-0.246659	-1.07425	-1.32455	1.33029	-0.294752	-1.38445	0.393537	0.809951	-0.038969	-1.19294	0.038969	0.008287	-2.37868	-0.81099	-2.27805	-0.520343	0.255783	0.191518	-0.354568
1	PF11_0126||PF3D7_1112000||conserved Plasmodium protein, unknown function	-0.34947	0.725283	0.258329	0.48082	-0.509394	-0.258329	0.333006	-1.92891	-0.011529	0.011529	-0.366374	0.641543	-0.305932	0.143639	-0.380316	0.425474	-0.159924	-0.983612	0.074677	-2.40973	-0.294403	0.13211	-0.013942	-0.216069
1	PF13_0142||PF3D7_1325000||lsm6 homologue, putative	0.900178	1.27817	1.27144	0.083614	-0.210349	-0.219973	-0.083614	-0.661737	0.08685	0.050382	0.0874	-1.33731	-0.13825	0.135677	-0.050382	-1.24629	-1.11053	-1.49814	-1.35506	-0.745351	-0.2251	0.085295	-0.137782	0.091024
1	PF08_0040||PF3D7_0821600||clp1-related protein, putative	1.2351	1.48317	0.497111	0.106644	-0.301202	-0.28997	-0.106644	-0.940304	0.371181	0.44803	-0.505024	-1.33811	0.289156	0.251053	-0.251053	-1.4622	-1.53631	-1.77314	-0.603755	-1.04695	-0.082025	-0.196977	0.253971	-0.124094
1	PF12TR016||PF3D7_1245700||product unspecified	0.67193	0.960084	0.300904	0.942587	-0.396182	-0.390821	-0.787762	-0.300904	0.131207	-0.238616	-0.873269	0.347645	0.186887	-0.131207	-0.634564	0.179478	-1.06811	-1.35091	-1.08867	-1.24349	0.05568	0.107409	0.238705	-0.168167
1	PF13_0331||PF3D7_1362300||conserved protein, unknown function	1.16238	1.34583	1.26796	0.216421	-0.373127	-0.216421	-0.313701	-0.529103	-0.068524	0.222939	0.068524	-1.30022	-0.568581	0.505619	0.130945	-0.963595	-1.53551	-1.56225	-1.58166	-0.745524	-0.500057	0.28268	0.062421	0.336626
1	PFI0336w||PF3D7_0907000||conserved Plasmodium protein, unknown function	0.852202	1.72705	1.19998	0.336589	-0.537175	-0.336589	-0.717379	-1.17301	0.985145	0.253506	-0.432424	-0.943143	0.370978	0.326139	-0.253506	-1.20521	-1.38938	-2.06364	-1.91736	-1.5096	-0.614167	0.072633	0.178918	-0.262063
1	RNAzID:1678||PF3D7_1328700||product unspecified	0.107764	1.26902	0.714396	0.396255	-0.756622	-0.107764	-0.523791	-1.78181	0.503133	1.36783	0.09819	-0.797438	-0.439479	0.974265	-0.156107	-0.09819	-0.864386	-1.37678	-1.23819	-2.17806	-0.942612	-0.393563	-0.254297	0.699248
1	PFC0390w||PF3D7_0309300||N2227-like protein, putative	1.19809	1.47392	0.313437	0.334859	-0.523171	-0.374865	-0.313437	-0.507029	0.740062	0.163116	-0.163116	-0.585353	0.341911	0.68857	-0.429442	-0.433446	-1.72126	-1.84879	-0.626874	-0.841888	-0.398151	0.525454	-0.266326	0.151907
1	PF11_0363||PF3D7_1135300||conserved Plasmodium membrane protein, unknown function	0.713286	1.40434	1.36829	0.521951	-0.54445	-0.615126	-0.617272	-0.521951	0.137051	0.308143	0.00894	-0.442501	-0.31035	0.448312	-0.00894	-0.176662	-1.25774	-2.01947	-1.98556	-1.0439	-0.447401	0.140169	-0.01788	0.265839
1	PFI0930c||PF3D7_0919000||nucleosome assembly protein	0.94921	0.922848	0.702068	0.243708	-0.800859	-0.357954	-0.243708	-1.63737	0.429247	-0.270141	0.013684	-1.25397	0.239363	-0.013684	0.137366	-1.47341	-1.75007	-1.2808	-0.945776	-1.88108	-0.189884	0.256457	0.123682	-0.219439
1	PF13_0317||PF3D7_1360000||conserved Plasmodium protein, unknown function	0.36926	0.54784	1.05715	0.516304	-0.57163	-0.665072	-0.491755	-0.36926	0.231555	-0.290689	0.626893	-0.22465	-0.329868	-0.019031	0.517911	0.019031	-0.94089	-1.21291	-1.5489	-0.885564	-0.561423	0.271658	-0.108982	0.243681
1	PFD0725c||PF3D7_0415000||arsenical pump-driving ATPase, putative	0.80825	1.45441	1.19058	0.351937	-0.613875	-0.351937	-0.65931	-0.61792	0.32553	0.026107	-0.023323	-0.856876	-0.211653	0.391821	0.023323	-0.661496	-1.42212	-1.80635	-1.84989	-0.969857	-0.537183	0.365714	0.046646	0.19538
1	PF10_0098||PF3D7_1010100||conserved Plasmodium protein, unknown function	1.13498	1.08685	1.1443	0.722384	-0.781076	-0.789214	-0.79827	-0.722384	0.241664	-0.161687	0.022122	-0.639141	-0.022122	0.050684	0.044541	-0.545032	-1.91605	-1.87607	-1.94257	-1.44477	-0.263786	0.212371	0.022419	0.094109
1	PFB0423c||PF3D7_0209400||conserved protein, unknown function	0.469014	0.797109	0.678273	-0.01488	-0.478106	-0.575812	0.01488	-0.504138	-0.083933	0.083933	0.437569	-0.766336	-0.247352	0.218518	0.542117	-0.849438	-0.94712	-1.37292	-0.663393	-0.489258	-0.163419	0.134585	0.104548	-0.083102
1	MAL8P1.111||PF3D7_0809900||JmjC domain containing protein	0.263551	0.743201	1.13049	0.83587	-0.607684	-0.622704	-0.263551	-0.74893	0.131708	-0.193419	0.296633	-0.296327	0.103624	-0.103624	0.208546	-0.607077	-0.871235	-1.36591	-1.39404	-1.5848	-0.028084	0.089795	-0.088087	-0.31075
1	PF14_0518||PF3D7_1454500||nifU protein, putative	0.465039	1.57369	0.780988	0.92786	-0.55711	-0.465039	-0.647351	-1.22813	0.636039	0.165807	-0.490121	-0.040604	0.040604	0.402198	-0.38069	-0.13457	-1.02215	-2.03873	-1.42834	-2.15599	-0.595435	0.236391	0.109431	-0.093966
1	PFI0255c||PF3D7_0905200||mitochondrial carrier protein, putative	0.976851	1.51187	0.426054	0.164639	-0.564603	-0.164639	-0.489915	-0.64406	0.481944	0.292372	-0.471353	-0.653579	0.181843	0.318603	-0.181843	-0.729488	-1.54145	-1.67651	-0.915969	-0.808699	-0.300101	0.026231	0.28951	-0.075909
1	MAL8P1.131||PF3D7_0807000||gas41 homologue, putative	0.771334	1.09753	0.78912	0.088568	-0.411287	-0.088568	-0.265022	-0.742032	-0.01249	0.156238	0.107747	-1.0697	-0.418252	0.371994	0.01249	-0.8589	-1.18262	-1.18609	-1.05414	-0.8306	-0.405762	0.215756	-0.095257	0.2108
1	MAL8P1.130||PF3D7_0807200||conserved Plasmodium membrane protein, unknown function	1.34435	1.71329	0.533339	-0.088898	-0.903671	0.088898	-0.812754	-1.34786	0.954995	0.399799	-0.422116	-0.830323	0.518771	0.82153	-0.399799	-0.703142	-2.24802	-1.62439	-1.34609	-1.25896	-0.436224	0.421731	0.022317	0.127181
1	PFI0150c||PF3D7_0903100||retrieval receptor for endoplasmic reticulum membrane proteins, putative	0.849151	1.19009	0.76358	0.158661	-0.778584	-0.158661	-0.486096	-1.25711	0.529197	0.634306	-0.105901	-0.598491	-0.121229	1.16154	0.105901	-0.313894	-1.62773	-1.34875	-1.24968	-1.41578	-0.650426	0.527236	0.211802	0.284597
1	PF11_0068||PF3D7_1105700||conserved protein, unknown function	0.512248	0.999579	0.054095	0.041945	-0.733114	-0.413845	-0.041945	-0.746787	0.576602	-0.159404	-0.168765	0.064169	0.365726	0.032333	-0.079227	-0.032333	-1.24536	-1.41342	-0.09604	-0.788732	-0.210876	0.191737	0.089538	-0.096502
1	PFL2310w||PF3D7_1248200||RNA binding protein, putative	0.594221	1.29999	0.605368	0.647003	-0.988932	-0.594221	-0.897858	-0.857509	0.153915	0.221891	-0.22038	-0.200821	-0.022646	0.124581	0.022646	-0.259365	-1.58315	-1.89421	-1.50323	-1.50451	-0.176561	-0.09731	0.243026	-0.058544
1	MAL7P1.130||PF3D7_0724300||3-demethylubiquinone-9 3-methyltransferase, putative	0.522466	0.487565	1.15912	0.318284	-1.02787	-0.938153	-0.318284	-0.444446	-0.153066	0.106194	0.229232	-0.540536	-0.054565	0.054565	0.667106	-0.676366	-1.55033	-1.42572	-1.4774	-0.76273	0.098501	-0.051629	0.437874	-0.13583
1	MAL13P1.385||PF3D7_1343900||RNA binding protein, putative	0.475546	0.816994	0.752193	0.613366	-0.803388	-0.700004	-0.475546	-0.564056	-0.038273	0.214138	0.038273	-0.289443	-0.161963	0.295061	0.052323	-0.273806	-1.27893	-1.517	-1.22774	-1.17742	-0.12369	0.080923	0.01405	0.015637
1	PF14_0704||PF3D7_1473500||conserved Plasmodium protein, unknown function	1.54961	1.26448	0.641262	0.105384	-0.613118	-0.145992	-0.105384	-0.353844	0.459575	0.244988	-0.607069	-1.18282	0.456771	0.314914	-0.244988	-1.12782	-2.16273	-1.41048	-0.746646	-0.459228	-0.002804	0.069926	0.362081	0.054996
1	PF13_0034||PF3D7_1306600||vacuolar ATP synthase subunit h, putative	0.885489	0.980579	1.16609	0.391135	-0.642572	-0.450132	-0.729026	-0.391135	-0.166254	0.24382	0.166254	-0.822489	-0.709564	0.366608	0.218435	-0.745873	-1.52806	-1.43071	-1.89511	-0.78227	-0.54331	0.122788	0.052181	0.076616
1	PF14_0714||PF3D7_1474600||conserved Plasmodium membrane protein, unknown function	0.192784	1.42811	0.666405	0.869109	-1.01063	-0.510166	-0.192784	-1.09774	0.255309	-0.127442	-0.025165	0.575913	-0.067994	0.025165	-0.191847	0.202141	-1.20341	-1.93828	-0.859189	-1.96685	-0.323303	0.152607	-0.166682	-0.373772
1	PFL2445c||PF3D7_1250900||conserved Plasmodium protein, unknown function	0.430566	0.355749	0.696288	-0.053455	-1.04945	-0.574343	0.053455	-1.09722	-0.059454	0.069901	0.136149	-1.18742	-0.237784	0.059454	0.162392	-1.05132	-1.48002	-0.930092	-0.642833	-1.04376	-0.17833	-0.010447	0.026243	0.136099
1	S1-type_28S:rRNA||PF3D7_0112700||ncRNA	0.272824	0.6844	0.294011	0.21539	-0.843428	-1.31404	-1.48466	-0.21539	-0.405806	-0.114536	0.906311	0.114536	-0.614007	0.281579	0.481923	-0.488095	-1.11625	-1.99844	-1.77867	-0.43078	-0.208201	0.396115	-0.424388	-0.602631
1	PF07_0090a||PF3D7_0721900||conserved Plasmodium protein, unknown function	0.16409	0.26384	0.433999	0.586657	-1.07871	-0.900756	-0.16409	-0.619338	-0.05738	0.05738	-0.187979	0.087747	-0.426129	0.302113	-0.218624	0.19805	-1.2428	-1.1646	-0.598089	-1.206	-0.368749	0.244733	-0.030645	0.110303
1	PFI1610c||PF3D7_0933200||calcyclin binding protein, putative	0.520649	0.290755	1.52359	0.458812	-0.940561	-1.11854	-0.450365	-0.290755	-0.006825	0.006825	0.631466	-0.353635	-0.235361	0.061209	0.768851	-0.472407	-1.46121	-1.4093	-1.97395	-0.749567	-0.228536	0.054384	0.137385	-0.118772
1	PF10_0208||PF3D7_1021400||endomembrane protein 70, putative	0.5101	1.31875	1.3704	0.732815	-1.04334	-0.718115	-0.5101	-0.898566	0.131391	-0.088835	0.088835	-0.474097	-0.220366	0.267188	0.214547	-0.425199	-1.55344	-2.03687	-1.8805	-1.63138	-0.351757	0.356023	0.125712	0.048898
1	MAL13P1.113||PF3D7_1320500||SNARE protein, putative	0.472778	0.547505	1.00952	0.070762	-1.23096	-0.782857	-0.070762	-0.475512	-0.089485	0.62694	0.05908	-0.718998	-0.05908	0.309247	0.478526	-0.729865	-1.70374	-1.33036	-1.08028	-0.546274	0.030405	-0.317693	0.419446	-0.010867
1	PFD1050w||PF3D7_0422300||alpha tubulin 2	1.38725	1.38408	0.76853	0.745362	-1.48217	-1.81606	-1.26028	-0.745362	0.283809	-0.564407	0.188319	-0.233508	0.085433	-0.031544	0.031544	-0.420015	-2.86942	-3.20014	-2.02881	-1.49072	-0.198376	0.532863	-0.156775	-0.186507
1	PF14_0717||PF3D7_1474900||trailer hitch, putative	0.664986	0.811572	1.13723	0.559936	-1.04039	-1.91938	-0.818667	-0.559936	-0.200753	-0.141269	0.545957	0.055192	-0.335294	0.156422	0.657438	-0.055192	-1.70537	-2.73095	-1.9559	-1.11987	-0.134541	0.297691	0.111481	-0.110384
1	MAL13P1.144||PF3D7_1326400||translation initiation factor EIF-2B gamma subunit, putative	0.939286	1.20576	0.846121	0.194555	-0.905612	-0.257721	-0.194555	-0.429178	0.286208	0.359	-0.175238	-1.01353	-0.069923	0.247356	0.069923	-1.21751	-1.8449	-1.46348	-1.04068	-0.623733	-0.356131	-0.111644	0.245161	-0.203985
1	PFF0365c||PF3D7_0607400||G-protein associated signal transduction protein, putative	0.765157	1.00681	1.13269	0.32648	-0.803567	-0.803584	-0.32648	-0.497502	-0.203678	0.203678	0.371883	-0.448149	-0.435204	0.430097	0.287738	-0.261995	-1.56872	-1.81039	-1.45917	-0.823982	-0.231526	0.226419	-0.084145	0.186154
1	PF10_0169||PF3D7_1017400||phosphomannomutase, putative	1.17607	1.41818	-0.030077	0.070485	-1.21662	0.030077	-0.191223	-1.45041	0.533244	0.517582	-0.953691	-0.282372	0.282372	0.750821	-0.587749	-0.737646	-2.39268	-1.38811	-0.161146	-1.5209	-0.250872	0.233239	0.365942	-0.455274
1	PFL0340w||PF3D7_1206800||conserved Plasmodium protein, unknown function	0.911906	1.31627	0.881976	0.403505	-1.02556	-0.896061	-0.403505	-0.625067	-0.059626	0.059626	0.239457	-0.401822	-0.523359	0.066513	0.408095	-0.3546	-1.93746	-2.21233	-1.28548	-1.02857	-0.463733	0.006887	0.168638	0.047222
1	PF11_0059||PF3D7_1104800||metabolite/drug transporter, putative	0.982236	0.769557	0.430498	-0.356231	-1.45474	-0.236135	0.236135	-1.33577	-0.310273	0.76245	0.310273	-0.775197	-0.701214	1.00888	0.464929	-0.681289	-2.43698	-1.00569	-0.194363	-0.979535	-0.390941	0.246427	0.154656	0.093908
1	PF14_0646||PF3D7_1467800||conserved Plasmodium protein, unknown function	0.50959	1.23992	1.6421	0.669923	-1.19451	-1.01517	-0.50959	-0.639151	-0.146577	0.146577	0.475858	-0.476309	-0.672474	0.209635	0.749669	-0.371499	-1.7041	-2.2551	-2.1517	-1.30907	-0.525897	0.063058	0.273811	0.10481
1	PF08_0032||PF3D7_0823800||DnaJ protein, putative	0.377605	0.82891	1.18319	0.336497	-1.66561	-0.51417	-0.336497	-0.884416	-0.354154	0.25517	0.824291	-0.25517	-0.406988	0.321186	0.626275	-0.367176	-2.04321	-1.34308	-1.51968	-1.22091	-0.052834	0.066016	-0.198016	-0.112006
1	PF14_0077||PF3D7_1408000||plasmepsin II	1.22222	1.48773	0.743515	0.24021	-1.97525	-0.24021	-0.255345	-1.65774	-0.007833	0.467802	-0.019609	0.007833	-0.260238	0.724369	0.122075	-0.545427	-3.19747	-1.72794	-0.99886	-1.89795	-0.252405	0.256567	0.141684	-0.55326
1	PF10_0127||PF3D7_1013000||conserved Plasmodium protein, unknown function	-0.302346	0.049316	0.058342	0.042978	0.708408	-0.429497	-0.042978	-1.06875	-0.075582	0.075582	-0.133895	0.935169	-0.205696	0.218543	-0.132865	1.00824	1.01075	-0.478813	-0.10132	-1.11173	-0.130114	0.142961	0.00103	0.073073
1	PF14_0666||PF3D7_1469800||conserved Plasmodium protein, unknown function	0.052638	-0.422874	0.432877	0.032981	0.568561	-0.515637	-0.032981	-0.967939	-0.63736	0.174137	0.568262	-0.153404	-0.889508	0.099756	0.704415	-0.099756	0.515923	-0.092763	-0.465858	-1.00092	-0.252148	-0.074381	0.136153	0.053648
1	PF11_0269||PF3D7_1125900||conserved Plasmodium protein, unknown function	0.376078	0.213039	-0.30463	0.255382	0.328255	-0.335278	-0.213039	-0.627127	0.158107	0.040165	-0.93004	-0.040165	0.185252	0.256108	-0.566252	-0.457674	-0.047823	-0.548317	0.091591	-0.882509	0.027145	0.215943	0.363788	-0.417509
1	PFL2130w||PF3D7_1244400||conserved Plasmodium protein, unknown function	0.91935	1.18629	-0.504622	-0.306365	0.306365	0.328859	-0.351181	-0.508539	1.78029	-0.11144	-0.277478	0.11144	2.32523	0.416743	-0.176026	-0.359816	-0.612985	-0.857429	0.153441	-0.202174	0.544939	0.528183	0.101452	-0.471256
1	PFI1725w||PF3D7_0935700||Plasmodium exported protein, unknown function	0.711945	0.901761	-0.607214	0.846892	0.042833	-0.042833	-0.180048	-0.63263	0.675499	0.335101	-2.02569	-0.162261	0.639757	0.162261	-1.15937	-0.572643	-0.669112	-0.944594	0.427166	-1.47952	-0.035742	-0.17284	0.866313	-0.410382
1	PFA0565c||PF3D7_0111700||conserved Plasmodium protein, unknown function	0.232782	0.332476	0.391668	-0.658426	0.292171	-0.283405	-0.232782	-0.733398	-0.172897	0.543424	0.231345	-0.588555	-0.772104	0.416755	0.172897	-0.63946	0.059389	-0.615881	-0.62445	-0.074972	-0.599207	-0.126669	-0.058448	-0.050905
1	PFE1005w||PF3D7_0520000||40S ribosomal protein S9, putative	0.69508	1.14082	0.306608	-0.710219	-0.015821	0.015821	-0.50637	-0.76589	0.066744	0.332143	-0.524973	-1.86693	-0.066744	0.391786	0.145501	-2.47301	-0.710901	-1.12499	-0.812978	-0.055671	-0.133488	0.059643	0.670474	-0.606079
1	PF13_0213||PF3D7_1338200||60S ribosomal protein L6-2, putative	0.991412	1.27644	0.287144	-0.563234	-0.155463	0.114059	-0.114059	-1.56143	0.146406	0.372768	-0.655104	-1.61654	0.144522	0.502579	-0.144522	-2.13421	-1.14687	-1.16238	-0.401203	-0.998196	-0.001884	0.129811	0.510582	-0.517665
1	PF14_0128-b||PF3D7_1412900||ubiquitin conjugating enzyme, putative	0.085659	0.453848	0.156148	-0.408758	0.057297	-0.057297	-0.4974	-0.406869	0.727132	0.15108	0.013777	-0.687134	0.33941	-0.013777	-0.117925	-0.979642	-0.028362	-0.511145	-0.653548	0.001889	-0.387722	-0.164857	-0.131702	-0.292508
1	PFC0740c||PF3D7_0316900||RING zinc finger protein, putative	-0.239457	0.162303	-0.48871	0.289996	0.059362	0.095326	-0.059362	-0.977194	0.185995	-0.198507	-0.648883	0.999339	0.162545	-0.162545	-0.341212	0.46509	0.298819	-0.066977	0.429348	-1.26719	-0.02345	0.035962	0.307671	-0.534249
1	PF13_0351||PF3D7_1366700||conserved Plasmodium protein, unknown function	-0.149534	0.201485	-0.484593	0.085333	-0.077663	0.077663	0.214943	-0.885487	0.206707	0.17347	-0.698114	0.328078	-0.119089	0.027971	-0.368036	-0.027971	0.071871	-0.123822	0.699536	-0.97082	-0.325796	-0.145499	0.330078	-0.356049
1	PFL0180w||PF3D7_1203600||cytochrome c1 heme lyase, putative	-0.051104	0.051104	0.459456	-0.10089	0.144319	-0.434699	0.052824	-0.20808	0.257636	0.051018	0.003869	-1.00699	-0.003869	-0.089345	0.138058	-1.02196	0.195423	-0.485803	-0.406632	-0.10719	-0.261505	-0.140363	0.134189	-0.014971
1	PFA0220w||PF3D7_0104300||ubiquitin carboxyl-terminal hydrolase, putative	0.090984	0.458507	-0.760342	0.707888	-0.090984	0.457877	-0.109672	-0.936366	0.643308	-0.389505	-0.909555	1.22231	0.951068	-0.401581	-1.1045	0.389505	-0.181968	-0.00063	0.65067	-1.64425	0.30776	-0.012076	-0.194947	-0.832808
1	PF13_0267||PF3D7_1350900||conserved Plasmodium protein, unknown function	0.941842	1.2691	-0.047004	0.020511	0.324587	-0.04647	-0.020511	-0.147962	1.0883	0.325937	-0.543141	-0.587228	1.00482	0.38319	-0.325937	-0.947805	-0.617255	-1.31557	0.026493	-0.168473	-0.083479	0.057253	0.217204	-0.360577
1	PFI0985c||PF3D7_0920100||chaperone, putative	0.071076	0.189365	0.337998	-0.423948	-0.012507	-0.264507	-0.79871	0.012507	-0.028426	0.453788	0.028426	-0.928738	-0.392474	0.334242	0.224809	-0.932546	-0.083583	-0.453872	-1.13671	0.436455	-0.364048	-0.119546	0.196383	-0.003808
1	PFL0175c||PF3D7_1203500||conserved Plasmodium protein, unknown function	0.748853	0.804392	-0.220691	-0.365992	0.343937	-0.255296	-0.287061	0.220691	0.953837	0.255941	-0.40203	-0.96105	0.809097	0.070417	-0.070417	-1.30536	-0.404916	-1.05969	-0.06637	0.586683	-0.14474	-0.185524	0.331613	-0.344306
1	PF14_0336||PF3D7_1435500||conserved Plasmodium protein, unknown function	0.018342	-0.663145	0.429677	0.079768	-0.018342	-0.651381	0.076714	-0.153826	-0.030803	0.246026	0.3822	-0.530542	-0.30104	0.030803	0.554373	-0.708084	-0.036684	0.011764	-0.352963	-0.233594	-0.270237	-0.215223	0.172173	-0.177542
1	PFL2160c||PF3D7_1245000||conserved Plasmodium protein, unknown function	-0.019976	-0.04925	0.392796	0.231586	0.053064	-0.200059	0.019976	-0.32671	-0.060492	0.261561	0.602189	-0.107725	-0.03962	0.03962	0.685177	-0.185738	0.07304	-0.150809	-0.37282	-0.558296	0.020872	-0.221941	0.082988	-0.078013
1	MAL13P1.75||PF3D7_1314700||conserved Plasmodium protein, unknown function	0.485202	-0.401821	0.578831	0.07502	0.100284	-0.50661	-0.07502	-0.152415	-0.316115	0.284006	0.444476	-0.52549	-0.045225	0.045225	0.717163	-0.80743	-0.384918	-0.104789	-0.653851	-0.227435	0.27089	-0.238781	0.272687	-0.28194
1	Pfa_snoR_05||PF3D7_0826800||ncRNA	0.717722	0.382248	0.052873	-1.09671	-0.052873	0.354262	-0.065677	-1.10148	0.062507	0.19776	0.075877	-0.932566	-0.227971	0.765671	-0.062507	-0.677551	-0.770595	-0.027986	-0.11855	-0.004765	-0.290478	0.567911	-0.138384	0.255015
1	PF07_0043||PF3D7_0710600||60S ribosomal protein L34a, putative	0.750042	0.250234	0.236357	-0.959035	-0.427683	0.202725	-0.202725	-0.842786	0.10682	0.444369	-0.45577	-1.75394	-0.083987	0.727484	0.083987	-2.36468	-1.17772	-0.047509	-0.439082	0.116249	-0.190807	0.283115	0.539757	-0.61074
1	PF11_0105||PF3D7_1109400||U3/U14 snoRNA-associated small subunit rRNA processing protein, putative	0.85625	1.06708	-0.343189	-0.533974	0.02016	0.287798	-0.02016	-0.807143	0.615554	0.700219	-0.733752	-0.612514	0.374949	0.911519	-0.374949	-0.975608	-0.83609	-0.779282	0.323029	-0.273169	-0.240605	0.2113	0.358803	-0.363094
1	PF11_0251||PF3D7_1124000||endoplasmic reticulum oxidoreductin, putative	-0.237895	0.25917	0.668226	0.102216	0.189741	-0.228525	-0.102216	-0.989677	0.21586	-0.182344	0.376064	-0.288659	-0.126091	0.126091	0.299581	-0.213941	0.427636	-0.487695	-0.770442	-1.09189	-0.341951	0.308435	-0.076483	0.074718
1	PF13_0215||PF3D7_1339300||conserved Plasmodium protein, unknown function	0.096889	0.269258	-0.194652	0.523853	-0.116549	0.254216	-0.096889	-0.263293	-0.230654	0.097484	0.038713	0.261857	-0.088647	-0.03593	0.03593	-0.131204	-0.213438	-0.015042	0.097763	-0.787146	0.142007	-0.133414	-0.002783	-0.393061
1	PFI0610w||PF3D7_0912500||conserved Plasmodium protein, unknown function	0.213	0.275501	0.496035	-0.222489	-0.023701	-0.293753	-0.519994	0.023701	0.34229	0.027129	-0.203811	-1.08226	0.17499	-0.027129	0.052219	-1.37737	-0.236701	-0.569254	-1.01603	0.24619	-0.1673	-0.054258	0.25603	-0.29511
1	PFB0826c||PF3D7_0217700||conserved Plasmodium protein, unknown function	1.34644	1.20102	0.168791	-0.322176	-0.114059	0.114059	-0.130722	-0.587936	0.148076	0.490198	-0.152907	-1.39978	-0.050037	0.640613	0.050037	-1.16491	-1.4605	-1.08696	-0.299513	-0.26576	-0.198113	0.150415	0.202944	0.234869
1	PF13_0124||PF3D7_1321800||SFT2-like protein, putative	0.047954	0.847785	-0.488171	-0.047954	-0.070859	0.290789	0.094989	-0.526436	0.297407	0.12183	-0.878918	-0.031029	-0.042933	0.517887	-0.926308	0.031029	-0.118813	-0.556996	0.58316	-0.478482	-0.34034	0.396057	-0.04739	0.062058
1	PFL2195w||PF3D7_1245800||clathrin coat assembly protein AP180, putative	0.289737	0.585989	0.006436	0.584253	-0.159397	-0.006436	-0.330479	-0.489868	0.19793	-0.131134	-0.520697	0.696989	0.177177	-0.119212	-0.20408	0.119212	-0.449134	-0.592425	-0.336915	-1.07412	-0.020753	0.011922	0.316617	-0.577777
1	PF14_0599||PF3D7_1462900||conserved Plasmodium protein, unknown function	0.620753	0.59524	-0.162834	-0.594047	-0.07964	0.093235	0.07964	-0.216414	0.482316	0.383035	-0.330816	-1.08593	0.432284	0.275982	-0.275982	-1.17972	-0.700393	-0.502005	0.242474	0.377633	-0.050032	-0.107053	0.054834	-0.093799
1	PFI1480w||PF3D7_0930400||conserved Plasmodium protein, unknown function	0.396163	0.108764	-0.488265	-0.108764	-0.388066	0.174432	0.478995	-0.518703	0.622294	0.545624	-0.522398	-0.178931	1.26419	0.178931	-0.340083	-0.712685	-0.784229	0.065668	0.96726	-0.409939	0.641895	-0.366693	0.182315	-0.533754
1	PFL1635w||PF3D7_1233900||Ulp1 protease, putative	0.095312	0.113264	0.543936	-0.014552	-0.131811	-0.203558	0.014552	-1.20629	-0.052624	0.00411	0.086629	-0.627632	0.253933	-0.00411	0.258105	-1.02987	-0.227123	-0.316822	-0.529384	-1.19174	0.306557	-0.00822	0.171476	-0.402237
1	PF13_0106||PF3D7_1319100||conserved protein, unknown function	0.396914	0.535457	0.042725	0.270187	-0.042725	-0.218168	-0.26453	-0.950549	1.27229	-0.051291	-0.452228	0.052128	0.867989	0.051291	-0.172797	-0.361175	-0.439639	-0.753625	-0.307255	-1.22074	-0.404297	0.102582	0.279431	-0.413303
1	PF14_0107||PF3D7_1410900||conserved Plasmodium protein, unknown function	-0.167139	-0.000404	-0.065301	0.349998	0.000404	0.165873	0.084443	-0.528911	-0.013777	0.05658	-0.274016	0.240848	-0.023709	0.013777	-0.237671	0.049219	0.167543	0.166277	0.149744	-0.878909	-0.009932	-0.042803	0.036345	-0.191629
1	PF14_0246||PF3D7_1426700||phosphoenolpyruvate carboxylase, putative	-0.277672	0.69182	0.75132	0.865162	0.01279	-0.01279	-0.369202	-1.01322	-0.153218	-0.367764	0.181512	0.76896	-0.031473	-0.329037	0.031473	0.360139	0.290462	-0.70461	-1.12052	-1.87838	0.121745	0.038727	-0.150039	-0.408821
1	PFF1415c||PF3D7_0629200||DnaJ protein, putative	0.323058	0.034748	0.624754	-0.034748	0.099441	-0.138097	-0.056562	-0.275062	-0.233053	0.375899	0.371474	-0.807046	-0.300708	0.233053	0.486918	-0.75046	-0.223617	-0.172845	-0.681316	-0.240314	-0.067655	-0.142846	0.115444	0.056586
1	MAL7P1.178||PF3D7_0731800||alpha/beta hydrolase, putative	0.770146	1.64203	-0.438173	0.798125	0.307057	-0.471571	-0.775257	-0.307057	1.63726	-0.056102	-1.23884	0.056102	1.76515	0.199777	-1.03652	-0.247161	-0.463089	-2.1136	-0.337084	-1.10518	0.127889	0.255879	0.202322	-0.303263
1	PFF0175c||PF3D7_0603600||conserved Plasmodium protein, unknown function	0.418007	0.113509	-0.023037	0.196178	-0.378567	-0.590203	-0.400853	0.023037	0.073973	0.198567	0.031897	-0.461776	0.240012	-0.031897	-0.058926	-0.363955	-0.796574	-0.703712	-0.377816	-0.173141	0.166039	-0.230464	-0.090823	0.097821
1	PF07_0102||PF3D7_0724200||immunoglobulin-binding protein 1-related, putative	0.332368	0.409727	0.450623	-0.294542	-0.341689	-0.451772	-0.037916	0.037916	-0.00432	0.00432	-0.079172	-1.21084	0.120877	0.22125	0.280026	-0.933313	-0.674057	-0.861499	-0.488539	0.332458	0.125197	0.21693	0.359198	0.277525
1	PF08_0115||PF3D7_0806500||DnaJ protein, putative	0.083692	0.799381	-0.045888	0.926673	0.012025	-0.012025	-0.456589	-0.460214	0.299435	-0.263022	-0.494536	0.865247	0.398484	-0.187349	-0.35235	0.187349	-0.071667	-0.811406	-0.410701	-1.38689	0.099049	0.075673	0.142186	-0.677898
1	PF11_0455||PF3D7_1144200||conserved Plasmodium protein, unknown function	0.555693	0.109491	0.555446	-0.110638	-0.248898	-0.57313	0.099127	-0.099127	-0.107752	0.222058	0.107752	-0.394498	-0.133875	0.195444	0.332448	-0.299571	-0.804591	-0.682621	-0.456319	0.011511	-0.026123	-0.026614	0.224696	0.094927
1	MAL13P1.335||PF3D7_1366800||phosphatidylserine synthase I, putative	0.057867	0.640587	-0.210277	0.380188	-0.203266	0.158359	-0.057867	-0.632752	-0.159249	0.159249	-0.568959	0.339168	-0.333646	0.437272	-0.533226	0.18947	-0.261133	-0.482228	0.15241	-1.01294	-0.174397	0.278023	0.035733	-0.149698
1	MAL7P1.107||PF3D7_0720600||conserved Plasmodium protein, unknown function	-0.092576	0.225746	0.374215	0.013258	-0.596155	-0.013258	0.196959	-0.73083	0.177605	-0.37786	0.531052	0.025795	-0.025795	-0.22798	0.557559	-0.035293	-0.503579	-0.239004	-0.177256	-0.744088	-0.2034	0.14988	0.026507	-0.061088
1	MAL8P1.151||PF3D7_0802500||inositol phosphatase, putative	0.373989	0.249729	0.040485	0.611555	-0.23302	-0.040485	-0.229146	-0.241293	-0.037191	0.160537	-0.124421	0.479369	-0.208243	0.037191	-0.147498	0.564811	-0.607009	-0.290214	-0.269631	-0.852848	-0.171052	-0.123346	-0.023077	0.085442
1	PF14_0738||PF3D7_1476800||lysophospholipase, putative	0.05779	0.928882	0.168031	0.204916	-0.05779	-0.123981	-0.544962	-0.646231	0.566609	0.006239	-0.006239	-0.149393	0.32119	0.194863	-0.173256	-0.034992	-0.11558	-1.05286	-0.712993	-0.851147	-0.245419	0.188624	-0.167017	0.114401
1	PFL0830w||PF3D7_1217200||snoRNA-associated small subunit rRNA processing protein, putative	0.720114	0.508376	-0.529879	-0.159463	-0.110583	0.110583	0.249562	-0.693269	0.82875	0.457525	-0.46883	-0.211471	0.806153	0.211471	-0.63778	-0.650251	-0.830697	-0.397793	0.779441	-0.533806	-0.022597	-0.246054	-0.16895	-0.43878
1	PFC0486c||PF3D7_0311500||conserved Plasmodium protein, unknown function	0.415433	1.08196	0.155586	0.609408	-0.18118	-0.155586	-0.570267	-0.444853	0.633583	0.055012	-0.59419	-0.055012	0.327904	0.523447	-0.40533	-0.116936	-0.596613	-1.23755	-0.725853	-1.05426	-0.305679	0.468435	0.18886	-0.061924
1	PFB0151c||PF3D7_0203200||conserved Plasmodium protein, unknown function	0.39861	0.693507	0.328899	0.151895	-0.191388	-0.151895	-0.17267	-0.570297	0.526094	0.196627	-0.196627	-0.501082	0.300501	0.339533	-0.284922	-0.560065	-0.589998	-0.845402	-0.501569	-0.722192	-0.225593	0.142906	-0.088295	-0.058983
1	Pfa_snoR_28||PF3D7_1424600||ncRNA	0.683668	0.747773	0.272842	-0.493969	-0.355001	0.087847	-0.087847	-0.849044	0.687614	0.835094	-0.244187	-0.702839	-0.011108	1.04806	0.011108	-0.456378	-1.03867	-0.659926	-0.360689	-0.355075	-0.698722	0.212963	0.255295	0.246461
1	PFD0085c||PF3D7_0401900||acyl-CoA synthetase, PfACS6	1.10224	2.50991	-0.176402	1.70086	0.022178	-0.022178	-0.63138	-0.165044	1.79731	-0.276523	-1.04193	0.704527	1.50829	-0.154672	-1.56022	0.154672	-1.08006	-2.53208	-0.454978	-1.8659	-0.289016	0.121851	-0.518296	-0.549855
1	PF10_0115||PF3D7_1011800||QF122 antigen	0.847119	-0.204252	0.37561	-0.117968	-0.275553	0.366168	0.117968	-0.924949	0.011767	0.250617	-0.011767	-0.535239	0.326143	0.144712	-0.050189	-1.26776	-1.12267	0.57042	-0.257642	-0.806981	0.314376	-0.105905	-0.038422	-0.732523
1	PF11_0175||PF3D7_1116800||heat shock protein 101	0.240659	1.63422	-1.7847	0.409509	-0.240659	0.346069	-0.797574	-1.83959	0.788902	-0.640065	-2.08079	0.850073	0.883524	-0.176032	-1.74313	0.176032	-0.481318	-1.28815	0.98713	-2.2491	0.094622	0.464033	0.337654	-0.674041
1	PFD0605c||PF3D7_0412200||conserved Plasmodium protein, unknown function	0.890989	0.711409	0.703257	-0.163255	-0.014184	-0.490227	-0.365436	0.014184	0.08855	0.150748	-0.06214	-1.00792	-0.290619	0.314693	0.06214	-0.795693	-0.905173	-1.20164	-1.06869	0.177439	-0.379169	0.163945	0.12428	0.212225
1	PFI0820c||PF3D7_0916700||RNA-binding protein musashi, putative	0.179063	2.62172	0.234002	1.47921	-0.179063	-0.337486	-1.83615	-1.91974	0.837224	-0.624697	-1.21076	0.529301	0.568302	-0.231402	-1.23694	0.231402	-0.358126	-2.95921	-2.07015	-3.39894	-0.268922	0.393295	-0.026181	-0.297899
1	PFL1490w||PF3D7_1230900||atypical protein kinase, RIO family, putative	0.46792	0.997272	-1.00135	-0.012736	-0.211541	0.012736	0.430008	-0.881776	0.864038	0.453923	-1.15991	-0.150169	0.725818	0.150169	-0.542453	-0.294881	-0.679461	-0.984536	1.43136	-0.86904	-0.13822	-0.303754	0.617453	-0.144712
1	PF07_0097||PF3D7_0723400||conserved Plasmodium protein, unknown function	0.600903	0.279147	-0.465694	0.065866	-0.414681	0.388371	-0.065866	-0.882105	0.54676	0.135937	-0.336452	-0.124759	0.913674	0.124759	-0.550916	-0.464488	-1.01558	0.109224	0.399828	-0.947971	0.366914	-0.011178	-0.214464	-0.339729
1	PF14_0387||PF3D7_1440800||major facilitator superfamily, putative	0.459299	0.057864	0.953975	-0.057864	-0.213074	0.080155	-0.245962	-0.524966	-1.22475	0.408446	0.557525	-0.611714	-1.25802	0.42893	0.53116	-0.408446	-0.672373	0.022291	-1.19994	-0.467102	-0.033278	0.020484	-0.026365	0.203268
1	PFC0735w||PF3D7_0316800||40S ribosomal protein S15A, putative	1.01074	1.34257	0.688878	-0.398883	0.07309	-0.07309	-0.259499	-1.44158	0.151825	0.514498	-0.151825	-1.26308	-0.170071	0.656303	0.222401	-1.48573	-0.937646	-1.41566	-0.948377	-1.0427	-0.321896	0.141805	0.374226	-0.222656
1	PFE1405c||PF3D7_0528200||eukaryotic translation initiation factor 3, subunit 6, putative	0.811926	0.990018	0.450818	0.170231	-0.360675	-0.170231	-0.505177	-0.832006	0.335935	0.132499	-0.237607	-0.905506	0.275934	0.352415	-0.132499	-1.22911	-1.1726	-1.16025	-0.955995	-1.00224	-0.060001	0.219916	0.105108	-0.323608
1	PF14_0519||PF3D7_1454600||mitochondrial ribosomal protein S11 precursor, putative	-0.037958	0.241124	0.453749	-0.075854	0.037958	-0.398742	-0.26964	0.177441	-0.167502	0.20126	0.202244	-0.66328	-0.367752	0.167502	0.550413	-0.653679	0.075916	-0.639866	-0.723389	0.253295	-0.20025	-0.033758	0.348169	0.009601
1	PFE0390w||PF3D7_0507900||conserved Plasmodium protein, unknown function	0.461448	1.02105	0.677426	0.181473	-0.181473	-0.426361	-0.964248	-0.736374	0.510135	0.302157	0.045947	-0.824256	-0.496776	0.557747	-0.045947	-0.515521	-0.642921	-1.44741	-1.64167	-0.917847	-1.00691	0.25559	-0.091894	0.308735
1	PFF0320c||PF3D7_0606500||polypyrimidine tract binding protein, putative	0.630006	0.685934	0.159008	0.022035	-0.12532	-0.022035	-0.524165	-0.802967	0.94924	0.221536	-0.262581	-0.575843	0.670914	0.191659	-0.191659	-0.738433	-0.755326	-0.707969	-0.683173	-0.825002	-0.278326	-0.029877	0.070922	-0.16259
1	PFC1055w||PF3D7_0323600||conserved Plasmodium protein, unknown function	0.202625	0.052201	0.320836	-0.346655	-0.525133	-0.052201	0.162626	-0.532832	-0.137406	0.504254	0.137406	-0.970857	-0.340143	0.348278	0.284214	-1.25894	-0.727758	-0.104402	-0.15821	-0.186177	-0.202737	-0.155976	0.146808	-0.288088
1	MAL13P1.290||PF3D7_1359200||high mobility group protein 4, putative	0.146597	-0.039432	0.716049	0.003615	-0.003615	-0.065643	0.332366	-0.786795	-0.084483	0.26371	0.230688	-0.656751	-0.261645	0.084483	0.520049	-0.891872	-0.150212	-0.026211	-0.383683	-0.79041	-0.177162	-0.179227	0.289361	-0.235121
1	PF14_0580||PF3D7_1460800||conserved Plasmodium protein, unknown function	-0.025327	0.025327	0.9402	0.233245	-0.041852	-0.441742	-0.190626	0.302133	-0.526727	-0.004534	0.79857	-0.207853	-0.411548	0.064498	0.938675	0.004534	-0.016525	-0.467069	-1.13083	0.068888	0.115179	0.069032	0.140105	0.212387
1	PFE0275w||PF3D7_0505600||conserved Plasmodium protein, unknown function	0.514905	0.446191	0.965771	0.222045	-0.48805	-0.222045	-0.368545	-0.254913	-0.128982	0.095672	0.230468	-0.317403	0.24517	-0.095672	0.423523	-0.857254	-1.00296	-0.668236	-1.33432	-0.476958	0.374152	-0.191344	0.193055	-0.539851
1	PF08_0016||PF3D7_0827300||conserved Plasmodium protein, unknown function	0.826678	0.279595	0.421825	-0.187717	-0.47919	-0.065782	0.065782	-0.559322	0.565919	0.333621	0.028478	-1.14611	0.799201	-0.28696	-0.028478	-1.96169	-1.30587	-0.345377	-0.356043	-0.371605	0.233282	-0.620581	-0.056956	-0.815571
1	MAL8P1.51||PF3D7_0821800||secretory complex protein 61 beta subunit	0.612965	0.886047	1.55029	0.121445	-0.188746	-0.121445	-0.786636	-0.460597	-0.08914	0.08914	0.248618	-0.785061	-0.53473	0.270319	0.379511	-0.906528	-0.801711	-1.00749	-2.33692	-0.582042	-0.44559	0.181179	0.130893	-0.121467
1	MAL7P1.35||PF3D7_0711200||conserved Plasmodium protein, unknown function	0.191643	0.630074	0.416086	0.45111	-0.191643	-0.643452	-0.936126	-0.28286	-0.055411	-0.236901	-0.174286	0.255616	0.055411	-0.368406	0.109105	0.178792	-0.383286	-1.27353	-1.35221	-0.73397	0.110822	-0.131505	0.283391	-0.076824
1	PF14_0110||PF3D7_1411200||rhomboid protease ROM8	0.337438	1.09018	-0.054362	1.24604	-0.458568	0.054362	-0.160098	-1.0414	0.023099	-0.268508	-1.18492	0.746487	0.444302	-0.023099	-1.00426	0.238922	-0.796006	-1.03582	-0.105736	-2.28744	0.421203	0.245409	0.180664	-0.507565
1	PF11_0356||PF3D7_1134500||alpha/beta hydrolase, putative	0.131274	0.200999	0.415082	0.242076	-0.503481	-0.131274	-0.14637	-0.763113	-0.089578	0.560915	0.074434	0.013607	-0.347253	0.796688	-0.013607	-0.135487	-0.634755	-0.332273	-0.561452	-1.00519	-0.257675	0.235773	-0.088041	-0.149094
1	PFF0715c||PF3D7_0614800||endonuclease III homologue, putative	0.094119	-0.329585	0.40789	0.129087	-0.470302	-0.094119	0.158804	-0.551532	-1.01734	0.249232	0.418364	-0.059852	-1.1432	0.002194	0.428404	-0.002194	-0.564421	0.235466	-0.249086	-0.680619	-0.12586	-0.247038	0.01004	0.057658
1	PF07_0103||PF3D7_0724400||mitochondrial import inner membrane translocase subunit tim14, putative	0.379934	0.266165	-0.216196	-0.014525	-0.440839	0.014525	0.301547	-0.789716	0.720331	0.438794	-0.432341	-0.485193	0.281077	0.592019	-0.281077	-0.318925	-0.820773	-0.25164	0.517743	-0.775191	-0.439254	0.153225	0.151264	0.166268
1	MAL7P1.157a||PF3D7_0728900||RNA binding protein, putative	0.528378	0.50747	0.611789	0.07983	-0.67835	-0.555357	-0.07983	-0.822495	0.165207	0.102864	0.004085	-0.801752	-0.004085	-0.060493	0.118772	-0.869645	-1.20673	-1.06283	-0.691619	-0.902325	-0.169292	-0.163357	0.114687	-0.067893
1	PFL2150c||PF3D7_1244800||cytoplasmic translation machinery associated protein, putative	1.00132	0.431054	-0.158781	-0.94466	-0.403329	0.158781	0.237061	-0.754681	0.360118	0.230677	-0.735965	-1.78291	0.45069	0.454446	-0.230677	-2.15462	-1.40465	-0.272273	0.395842	0.189979	0.090572	0.223769	0.505288	-0.371708
1	PFD0980w||PF3D7_0420200||holo-(acyl-carrier protein) synthase, putative	0.489114	-0.06021	0.360783	-0.048953	-0.247719	-0.214664	0.048953	0.097165	-0.080032	0.478483	0.514293	-0.093799	-0.232005	0.080032	0.726019	-0.180644	-0.736833	-0.154454	-0.31183	0.146118	-0.151973	-0.398451	0.211726	-0.086845
1	PFE0625w||PF3D7_0512600||Rab GTPase 1b	0.100078	0.286945	1.0745	0.588003	-0.100078	-0.169663	-0.377607	-0.28686	-0.031102	0.060026	0.961663	-0.028929	-0.076313	0.028929	0.594701	-0.265616	-0.200156	-0.456608	-1.45211	-0.874863	-0.045211	-0.031097	-0.366962	-0.236687
1	PF14_0562||PF3D7_1458900||conserved protein, unknown function	0.061374	0.453256	0.728291	-0.180975	-0.054886	-0.229122	-0.312476	0.054886	0.100266	-0.085034	0.282061	-0.58682	-0.230394	0.085034	0.187891	-0.217973	-0.11626	-0.682378	-1.04077	0.235861	-0.33066	0.170068	-0.09417	0.368847
1	PFL1745c||PF3D7_1236100||clustered-asparagine-rich protein	0.644259	0.909771	0.232843	-0.259858	-0.232843	0.30361	-0.466542	-0.60942	0.053803	0.232642	-0.109637	-1.15415	0.125192	0.289788	-0.053803	-1.25484	-0.877102	-0.606161	-0.699385	-0.349562	0.071389	0.057146	0.055834	-0.100688
1	PF14_0231||PF3D7_1424400||60S ribosomal protein L7-3, putative	1.53839	1.20511	0.483085	-0.388221	-0.226989	0.168682	-0.168682	-0.286864	0.385247	0.259964	-0.245595	-1.7051	0.131918	0.855013	-0.131918	-2.2536	-1.76538	-1.03643	-0.651767	0.101357	-0.253329	0.595049	0.113677	-0.54851
1	PF10_0314||PF3D7_1032100||dcp1 homologue, putative	0.652338	0.559878	0.068983	0.175479	-0.315591	-0.068983	-0.142241	-0.495892	0.365346	0.120279	-0.24281	-0.270355	0.673576	0.14821	-0.120279	-0.669692	-0.967929	-0.628861	-0.211224	-0.671371	0.30823	0.027931	0.122531	-0.399337
1	PF10_0373a||PF3D7_1038200||conserved Plasmodium protein, unknown function	0.425494	0.703128	0.490464	-0.21089	-0.600086	-0.539583	0.21089	-0.528956	0.538874	0.563819	-0.417147	-1.1116	0.047335	0.423402	-0.047335	-0.758233	-1.02558	-1.24271	-0.279574	-0.318066	-0.491539	-0.140417	0.369812	0.353369
1	PFL2060c||PF3D7_1242800||rab specific GDP dissociation inhibitor	-0.207362	0.872486	0.098082	0.226288	-0.310812	0.069144	-0.069144	-0.670816	0.289796	-0.267636	-0.01016	0.01016	0.045219	-0.184876	0.073691	-0.342313	-0.10345	-0.803342	-0.167226	-0.897104	-0.244577	0.08276	0.083851	-0.352473
1	PF11_0398||PF3D7_1138700||conserved Plasmodium protein, unknown function	0.190966	0.960793	-0.506273	0.970855	-0.327709	0.068144	-0.068144	-0.692167	0.421003	-0.227857	-1.234	0.850185	0.785984	-0.420138	-1.20273	0.227857	-0.518675	-0.892649	0.438129	-1.66302	0.364981	-0.192281	0.031272	-0.622328
1	PFE0765w||PF3D7_0515300||phosphatidylinositol 3-kinase	-0.005862	-0.155725	0.356042	0.005862	-0.547447	0.352858	0.215458	-0.488858	-0.265852	-0.163263	0.388978	0.206627	-0.277541	0.025192	0.340053	-0.025192	-0.541585	0.508583	-0.140584	-0.49472	-0.011689	0.188455	-0.048925	-0.231819
1	PF10_0053||PF3D7_1005000||methionine-tRNA ligase, putative	0.459456	0.126085	0.031527	0.093269	-0.078238	-0.638421	-0.031527	-0.341701	0.094307	0.404795	0.046669	-0.725305	-0.018076	0.018076	-0.099557	-0.801944	-0.537694	-0.764506	-0.063054	-0.43497	-0.112383	-0.386719	-0.146226	-0.076639
1	PFF0500c||PF3D7_0610100||step II splicing factor, putative	0.635341	-0.137938	0.277574	-0.21013	-0.79543	0.137938	0.492069	-0.756242	0.146647	0.088781	-0.49638	-1.07986	0.191198	0.054346	-0.054346	-1.41226	-1.43077	0.275876	0.214495	-0.546112	0.044551	-0.034435	0.442034	-0.332405
1	PFA0490w||PF3D7_0110000||conserved Plasmodium protein, unknown function	1.40908	0.784335	-0.036108	0.036108	-0.08814	-0.34273	0.188539	-0.486669	0.693628	0.140609	-0.52842	-1.06106	0.477682	0.437759	-0.140609	-1.18716	-1.49722	-1.12706	0.224647	-0.522777	-0.215946	0.29715	0.387811	-0.126103
1	PF11_0143||PF3D7_1113500||GTP binding protein, putative	0.07524	0.561546	-0.035995	0.323659	-0.46105	-0.64126	0.035995	-0.386481	-0.239435	-0.21987	0.010213	0.413794	-0.21472	-0.010213	0.151374	0.219243	-0.53629	-1.20281	0.07199	-0.71014	0.024715	0.209657	0.141161	-0.194551
1	PF07_0036||PF3D7_0709200||Cg6 protein	0.203361	0.501959	0.568185	-0.048539	-0.269529	-0.574477	-0.702309	0.048539	0.260332	-0.07968	0.321605	-0.453693	0.447824	-0.034445	0.034445	-0.702408	-0.47289	-1.07644	-1.27049	0.097078	0.187492	0.045235	-0.28716	-0.248715
1	PFD0207c||PF3D7_0404300||conserved Plasmodium protein, unknown function	0.318405	-0.086568	0.474767	-0.15171	-0.716552	0.086568	0.50695	-0.505767	-0.022199	0.008266	0.123963	-0.710311	-0.008266	0.027994	0.01576	-0.948213	-1.03496	0.173136	0.032183	-0.354057	0.013933	0.019728	-0.108203	-0.237902
1	PFD0945c||PF3D7_0419500||conserved Plasmodium membrane protein, unknown function	0.043214	0.517564	0.739665	0.296138	-0.513367	-0.222392	-0.043214	-0.448132	-0.083314	-0.008811	0.246285	0.008811	-0.04077	0.019756	0.266982	-0.028477	-0.556581	-0.739956	-0.782879	-0.74427	0.042544	0.028567	0.020697	-0.037288
1	PF08_0021||PF3D7_0826300||SPRY domain, putative	0.204808	-0.229145	0.998117	0.431089	-0.29663	-0.355265	0.390546	-0.204808	-0.517621	-0.106832	1.15671	0.115959	-0.25948	0.085313	1.3788	-0.085313	-0.501438	-0.12612	-0.607571	-0.635897	0.258141	0.192145	0.222095	-0.201272
1	PF11_0171||PF3D7_1116400||ER membrane protein Sec12	0.039805	0.221599	0.06298	0.077313	-0.412933	-0.230553	-0.039805	-1.17841	0.067313	-0.025086	0.00609	0.319035	-0.033911	0.261379	-0.091799	-0.00609	-0.452738	-0.452152	-0.102785	-1.25572	-0.101224	0.286465	-0.097889	-0.325125
1	PFC0582c-a||PF3D7_0314100||vesicle transport v-SNARE protein, putative	0.191925	1.05192	0.347131	0.732447	-0.464407	-0.26198	-0.191925	-0.302156	0.314831	-0.049011	-0.674266	0.655913	0.343858	-0.170184	-0.250693	0.049011	-0.656332	-1.3139	-0.539056	-1.0346	0.029027	-0.121173	0.423573	-0.606902
1	PFI0220w||PF3D7_0904500||prefoldin subunit, putative	0.625071	-0.031003	0.960118	0.031003	-0.412777	-0.354491	0.326904	-0.567261	-0.661571	0.376558	0.71346	-0.556289	-0.896479	0.325991	0.833731	-0.325991	-1.03785	-0.323488	-0.633214	-0.598264	-0.234908	-0.050567	0.120271	0.230298
1	PF10_0140||PF3D7_1014300||conserved protein, unknown function	0.080691	-0.039114	0.624293	0.039114	-0.300986	-0.12906	0.125807	-0.190671	-0.190818	-0.039149	0.651697	0.039149	0.108137	-0.040587	0.759697	-0.330215	-0.381677	-0.089946	-0.498486	-0.229785	0.298955	-0.001438	0.108	-0.369364
1	Pfa_snoR_35||PF3D7_0626840||ncRNA	0.292131	1.04359	0.822241	-0.132294	-0.076734	-0.082932	0.076734	-0.569147	0.256631	0.454292	-0.081572	-0.963585	-0.733525	0.752241	0.081572	-0.475411	-0.368865	-1.12652	-0.745507	-0.436853	-0.990156	0.297949	0.163144	0.488174
1	PF14_0685||PF3D7_1471800||conserved Plasmodium protein, unknown function	0.517188	0.208209	0.047435	0.238254	-0.617754	-0.131719	-0.047435	-0.350376	0.374678	0.141591	-0.846568	-0.141591	0.648112	0.193578	-0.429931	-0.612344	-1.13494	-0.339928	-0.09487	-0.58863	0.273434	0.051987	0.416637	-0.470753
1	PF14_0029||PF3D7_1402800||conserved Plasmodium protein, unknown function	0.087643	0.587337	0.486177	0.458456	-0.419149	-0.193946	-0.087643	-0.902124	-0.100482	0.013001	0.108494	0.349789	0.489725	-0.013001	-0.076229	-0.495974	-0.506792	-0.781283	-0.57382	-1.36058	0.590207	-0.026002	-0.184723	-0.845763
1	PF10_0103||PF3D7_1010600||eukaryotic translation initiation factor 2 beta subunit, putative	0.794677	0.802065	0.683553	-0.34636	-0.669798	0.02038	-0.02038	-0.690703	0.213688	0.2359	-0.154115	-1.0965	-0.077871	0.186577	0.077871	-1.23824	-1.46447	-0.781685	-0.703933	-0.344343	-0.291559	-0.049323	0.231986	-0.14174
1	PF11_0101||PF3D7_1108900||conserved Plasmodium protein, unknown function	1.17532	0.849021	0.069613	-0.500422	-0.306314	0.009291	-0.009291	-0.112496	0.287449	0.842599	-0.305543	-1.1821	0.208911	0.83315	-0.208911	-1.20293	-1.48164	-0.83973	-0.078904	0.387926	-0.078538	-0.009449	0.096632	-0.020821
1	PFL1215c||PF3D7_1225200||conserved Plasmodium protein, unknown function	0.207605	0.219008	0.361033	-0.051171	-0.421945	-0.169843	0.051171	-0.725111	0.128287	0.061825	-0.006854	-0.38454	0.006854	-0.254955	0.053331	-0.660054	-0.62955	-0.388851	-0.309862	-0.67394	-0.121433	-0.31678	0.060185	-0.275514
1	PF14_0496||PF3D7_1452100||leucine-rich repeat protein	0.851557	1.38371	0.294289	-0.050498	-0.099983	0.050498	-0.185504	-0.158734	0.766246	0.658493	-0.858934	-0.777021	0.469832	0.506956	-0.469832	-1.19845	-0.95154	-1.33321	-0.479793	-0.108236	-0.296414	-0.151537	0.389102	-0.42143
1	PF14_0432||PF3D7_1445500||conserved Plasmodium protein, unknown function	0.349734	0.908269	-0.238868	0.43833	-0.561711	0.134514	-0.134514	-1.18581	0.457285	0.205755	-1.14457	-0.205755	0.39512	0.366685	-0.847597	-0.490689	-0.911445	-0.773755	0.104354	-1.62414	-0.062165	0.16093	0.296976	-0.284934
1	PF14_0026||PF3D7_1402400||U1 small nuclear ribonucleoprotein c	0.021233	-0.021233	0.786814	0.091523	-0.21189	-0.115058	0.123242	-0.185941	-0.124192	0.147059	0.416451	-0.820289	-0.189794	0.124192	0.566509	-1.17054	-0.233123	-0.093825	-0.663572	-0.277464	-0.065602	-0.022867	0.150058	-0.350254
1	PF11_0452||PF3D7_1143800||conserved Plasmodium protein, unknown function	0.768674	1.04929	-0.047645	1.04136	-0.056762	0.047645	-0.756972	-0.503815	0.508666	-0.133003	-1.11608	0.133003	0.573992	0.195459	-0.829136	-0.681695	-0.825436	-1.00165	-0.709327	-1.54517	0.065326	0.328462	0.286947	-0.814698
1	PF11_0239||PF3D7_1122800||calcium dependent protein kinase 6	0.147604	1.20134	0.009584	0.498321	-0.179321	-0.131871	-0.009584	-0.060861	0.627131	-0.100214	-0.44698	0.347967	0.711724	0.064272	-0.064272	-0.116578	-0.326925	-1.33322	-0.019168	-0.559182	0.084593	0.164486	0.382708	-0.464545
1	MAL8P1.205||PF3D7_0831300||Plasmodium exported protein, unknown function	0.997999	0.585688	0.051128	0.66276	-0.548264	-0.428282	-0.051128	-0.144642	0.032488	0.007144	-0.007144	-0.495704	0.452665	-0.236523	0.077915	-0.989172	-1.54626	-1.01397	-0.102256	-0.807402	0.420177	-0.243667	0.085059	-0.493468
1	PFI0420c||PF3D7_0908700||tRNA pseudouridine synthase, putative	0.268528	0.682952	0.234191	-0.030786	-0.24908	-0.181043	0.030786	-0.233962	0.363752	0.412742	-0.658687	-0.21781	-0.031801	0.281403	0.031801	-0.197169	-0.517608	-0.863995	-0.203405	-0.203176	-0.395553	-0.131339	0.690488	0.020641
1	PFI0200c||PF3D7_0904100||adapter-related protein, putative	0.271498	0.175153	0.605208	0.070163	-0.408172	-0.277788	-0.070163	-0.663517	-0.121426	0.004566	0.467561	-0.609403	0.093577	-0.004566	0.43904	-0.753573	-0.67967	-0.452941	-0.675371	-0.73368	0.215003	-0.009132	-0.028521	-0.14417
1	PFE0925c||PF3D7_0518500||snrnp protein, putative	0.674193	0.135944	0.415328	0.029996	-0.046491	-0.184755	-0.029996	-0.614766	0.342791	-0.102269	-0.066849	-0.702126	0.59153	0.066849	0.130203	-1.0141	-0.720684	-0.320699	-0.445324	-0.644762	0.248739	0.169118	0.197052	-0.311977
1	PF10_0270||PF3D7_1027500||conserved Plasmodium protein, unknown function	0.620586	0.15663	0.467889	-0.339528	-0.617198	-0.506614	-0.15663	0.231522	0.212485	0.761074	-0.524341	-0.807998	-0.212485	0.489236	0.222275	-0.496698	-1.23778	-0.663244	-0.624519	0.57105	-0.42497	-0.271838	0.746616	0.3113
1	MAL7P1.34||PF3D7_0711100||conserved Plasmodium membrane protein, unknown function	0.125046	1.22846	0.002472	0.029344	-0.483474	-0.002472	-0.406286	-1.17588	0.742431	0.098435	-0.914399	-0.098435	0.362896	0.274463	-1.02275	-0.249711	-0.60852	-1.23093	-0.408758	-1.20522	-0.379535	0.176028	-0.10835	-0.151276
1	PFE0095c||PF3D7_0501900||conserved Plasmodium protein, unknown function	0.178391	0.151186	0.70905	0.052811	-0.39109	-0.110551	-0.052811	-0.111036	-0.11088	0.166825	0.363355	-0.3351	-0.517357	0.11088	0.546242	-0.317135	-0.569481	-0.261737	-0.761861	-0.163847	-0.406477	-0.055945	0.182887	0.017965
1	PF13_0280||PF3D7_1353600||ER lumen protein retaining receptor	-0.319183	0.514108	0.698931	0.624591	-0.091549	0.091549	-0.121091	-0.326025	-0.38058	-0.173172	0.161623	0.390717	-0.835827	-0.117243	0.117243	0.54056	0.227634	-0.422559	-0.820022	-0.950616	-0.455247	0.055929	-0.04438	0.149843
1	PFE0320w||PF3D7_0506500||conserved Plasmodium protein, unknown function	0.101385	0.19265	-0.041513	0.107657	-0.595567	-0.11616	0.041513	-1.07192	0.005777	0.039545	-0.125063	0.323794	0.586874	-0.157827	-0.304477	-0.005777	-0.696952	-0.30881	0.083026	-1.17958	0.581097	-0.197372	-0.179414	-0.329571
1	PF10_0091||PF3D7_1009400||zinc finger protein, putative	0.606715	0.184122	0.739286	0.065092	-0.270921	-0.207317	-0.065092	-0.106536	0.138397	-0.097251	0.039067	-0.665811	0.192316	-0.039067	0.076088	-0.79196	-0.877636	-0.391439	-0.804378	-0.171628	0.053919	0.058184	0.037021	-0.126149
1	PFL0355c||PF3D7_1207100||small subunit rRNA processing factor, putative	0.443786	0.229409	-0.180225	0.187658	-0.848036	-0.332943	0.180225	-1.2398	0.445841	0.380672	-0.186575	-0.300861	0.537404	0.153927	-0.153927	-0.955655	-1.29182	-0.562352	0.36045	-1.42746	0.091563	-0.226745	0.032648	-0.654794
1	PF10_0040||PF3D7_1003700||conserved Plasmodium protein, unknown function	0.379308	0.302179	0.107197	0.262199	-0.259203	-0.50545	-0.109452	-0.107197	0.00814	-0.204948	0.246515	-0.00814	-0.058246	-0.109602	0.020512	0.019321	-0.638511	-0.807629	-0.216649	-0.369396	-0.066386	0.095346	-0.226003	0.027461
1	PFL2010c||PF3D7_1241800||DEAD/DEAH box ATP-dependent RNA helicase, putative	0.886073	0.532305	-0.297261	-0.309619	-0.406057	0.297261	0.427717	-0.770208	0.720006	0.382624	-0.608051	-0.449422	0.651507	0.499915	-0.382624	-0.97284	-1.29213	-0.235044	0.724978	-0.460589	-0.068499	0.117291	0.225427	-0.523418
1	PF08_0127||PF3D7_0803100||conserved Plasmodium protein, unknown function	0.687724	0.627837	0.00294	-0.00294	-0.693086	-0.110347	0.062871	-0.650728	0.451958	0.427115	-0.434777	-0.616229	0.579415	0.217713	-0.217713	-0.991283	-1.38081	-0.738184	0.059931	-0.647788	0.127457	-0.209402	0.217064	-0.375054
1	MAL13P1.231||PF3D7_1346100||Sec61 alpha subunit, PfSec61	0.003968	0.399614	0.353986	-0.019727	-0.423988	0.223409	-0.003968	-1.01825	-0.084482	0.084482	0.525496	-0.381303	-0.411391	0.407215	0.470542	-0.354749	-0.427956	-0.176205	-0.357954	-0.998524	-0.326909	0.322733	-0.054954	0.026554
1	PF14_0197||PF3D7_1420300||zinc finger protein, putative	0.31892	0.421738	-0.243784	0.308195	-0.302538	-0.688036	0.243784	-0.575794	0.440233	0.187725	-1.58355	-0.381868	0.394916	0.385443	-1.02381	-0.187725	-0.621458	-1.10977	0.487568	-0.883989	-0.045317	0.197718	0.559747	0.194143
1	MAL13P1.35||PF3D7_1306900||U1 small nuclear ribonucleoprotein a, putative	0.657021	0.759894	0.522471	0.219767	-0.369119	-0.219767	-0.521771	-0.502414	0.383371	-0.00542	-0.011159	-0.274415	0.104679	0.065413	0.00542	-0.531326	-1.02614	-0.979661	-1.04424	-0.722181	-0.278692	0.070833	0.016579	-0.256911
1	PF11_0186||PF3D7_1118000||conserved Plasmodium protein, unknown function	-0.083117	0.519261	0.88475	-0.075655	-0.530192	0.075655	0.265485	-0.624026	0.113764	0.004118	0.273785	-0.643262	-0.210666	-0.004118	0.380872	-0.710322	-0.447075	-0.443606	-0.619265	-0.548371	-0.32443	-0.008236	0.107087	-0.06706
1	MAL13P1.71||PF3D7_1313900||conserved Plasmodium protein, unknown function	0.967472	0.855935	0.862623	0.048962	-0.328382	-0.184119	-0.240314	-0.048962	0.12205	0.503506	-0.106118	-1.06208	-0.083587	0.583644	0.083587	-0.930658	-1.29585	-1.04005	-1.10294	-0.097924	-0.205637	0.080138	0.189705	0.131426
1	PFL0160w||PF3D7_1203200||signal recognition particle SRP14	0.907958	1.10101	1.02706	0.231561	-0.411322	-0.231561	-0.370521	-0.573021	0.59977	0.423086	-0.305826	-1.07288	0.367394	0.197294	-0.197294	-1.28819	-1.31928	-1.33257	-1.39758	-0.804582	-0.232376	-0.225792	0.108532	-0.215308
1	PF13_0020||PF3D7_1304400||conserved Plasmodium protein, unknown function	-0.023478	0.018049	0.528035	-0.018049	-0.245533	0.441277	0.729749	-0.630923	-0.105563	0.192527	0.723417	-0.272377	-0.238322	0.105563	0.679798	-0.1823	-0.222055	0.423228	0.201714	-0.612874	-0.132759	-0.086964	-0.043619	0.090077
1	PFL1820w||PF3D7_1237600||rRNA processing WD-repeat protein, putative	0.740362	0.66199	-0.17395	-0.083244	-0.489946	0.083244	0.576841	-1.02873	0.450716	0.67168	-0.544949	-0.406417	0.226918	0.580375	-0.226918	-0.44442	-1.23031	-0.578746	0.750791	-0.94549	-0.223798	-0.091305	0.318031	-0.038003
1	PFI0320w||PF3D7_0906500||arginase, putative	1.03065	1.98083	0.104913	0.999119	-0.307728	-0.104913	-1.06964	-1.08462	0.476028	-0.046399	-1.11116	0.316853	0.335899	0.015006	-0.890994	-0.015006	-1.33838	-2.08574	-1.17455	-2.08374	-0.140129	0.061405	0.220164	-0.331859
1	PF11_0169||PF3D7_1116200||SNO glutamine amidotransferase family protein	1.37141	2.04142	0.377309	-0.116376	-0.319198	0.116376	-0.769655	-0.85888	0.885451	0.735314	-0.526727	-0.699892	0.526727	1.10947	-0.615986	-0.641985	-1.6906	-1.92504	-1.14696	-0.742504	-0.358724	0.374161	-0.089259	0.057907
1	PFI0745w||PF3D7_0915200||conserved Plasmodium protein, unknown function	0.203446	0.272153	0.742583	0.21454	-0.203446	-0.303598	-0.361602	-0.304146	0.111968	0.035979	0.424715	-0.583908	-0.035979	-0.074643	0.477033	-0.69962	-0.406892	-0.575751	-1.10418	-0.518686	-0.147947	-0.110622	0.052318	-0.115712
1	PFI1245c||PF3D7_0925400||protein phosphatase-beta	0.382835	0.362322	0.684308	0.46062	-0.430659	-0.975501	-0.784439	-0.362322	-0.09148	0.04327	0.524059	-0.05983	-0.194411	0.124009	0.495526	-0.04327	-0.813494	-1.33782	-1.46875	-0.822942	-0.102931	0.080739	-0.028533	0.01656
1	PF11_0510||PF3D7_1149300||serine/threonine protein kinase, FIKK family	0.214177	1.1225	-0.419758	0.288656	-0.212104	-0.571977	0.212104	-0.42367	1.02152	0.2616	-0.75696	-0.16553	0.601025	0.16553	-0.445042	-0.229159	-0.426281	-1.69448	0.631862	-0.712326	-0.420494	-0.09607	0.311918	-0.063629
1	PFE1445c||PF3D7_0529000||conserved Plasmodium protein, unknown function	0.299443	1.01151	0.08618	0.541179	-0.08618	-0.11435	-0.446578	-0.307429	0.054839	-0.054839	-0.202491	0.495825	-0.346503	0.44877	-0.336685	0.594006	-0.385623	-1.12586	-0.532758	-0.848608	-0.401342	0.503609	-0.134194	0.098181
1	PF14_0669||PF3D7_1470200||conserved Plasmodium protein, unknown function	1.05341	0.974027	-0.125669	-0.559909	-0.314734	0.125669	0.287142	-0.478361	0.948435	0.821064	-0.793342	-1.07702	0.470222	0.707854	-0.470222	-1.14463	-1.36815	-0.848358	0.412811	0.081548	-0.478213	-0.11321	0.32312	-0.067605
1	PFF1325c||PF3D7_0627300||c3h4-type ring finger protein, putative	-0.155493	0.22827	0.553561	0.559392	-0.676663	0.029896	-0.029896	-0.824724	0.056461	-0.00915	0.216017	0.00915	-0.075786	-0.06871	0.202477	-0.203289	-0.52117	-0.198374	-0.583457	-1.38412	-0.132247	-0.05956	-0.01354	-0.212439
1	PF14_0655||PF3D7_1468700||helicase 45	1.07063	1.22359	0.383132	-0.355166	-0.415179	0.108688	-0.108688	-1.02177	0.209107	0.257249	-0.032113	-0.992803	-0.090479	0.501772	0.032113	-1.40207	-1.48581	-1.1149	-0.49182	-0.666607	-0.299586	0.244523	0.064226	-0.409263
1	PF13_0101||PF3D7_1318300||conserved Plasmodium protein, unknown function	0.778774	-0.026006	0.4136	0.038833	-0.551009	-0.123435	-0.18897	0.026006	-0.236076	0.758778	-0.026209	-0.505749	0.026209	0.594089	0.390712	-0.519148	-1.32978	-0.097429	-0.60257	-0.012827	0.262285	-0.164689	0.416921	-0.013399
1	PF14_0037||PF3D7_1404000||conserved Plasmodium protein, unknown function	0.708794	0.326228	0.948796	0.331183	-0.613362	-0.441356	-0.434188	-0.326228	-0.35381	0.468411	0.35381	-0.598411	-0.695102	0.373847	0.604162	-0.47049	-1.32216	-0.767584	-1.38298	-0.657411	-0.341292	-0.094564	0.250352	0.127921
1	PFF0775w||PF3D7_0616000||pyridoxine kinase	0.592068	0.625611	0.439669	-0.203797	-0.201132	0.201132	-0.296203	-0.517246	-0.188167	0.513288	0.188167	-0.44781	-0.223916	0.508937	0.237166	-0.577287	-0.7932	-0.424479	-0.735872	-0.313449	-0.035749	-0.004351	0.048999	-0.129477
1	PFE1185w||PF3D7_0523800||transporter, putative	0.533892	1.57395	0.424437	0.324438	-0.324438	-0.416532	-0.799048	-0.588278	1.02979	0.079425	-0.079425	-0.386044	0.853034	0.355452	-0.376434	-0.34244	-0.85833	-1.99048	-1.22348	-0.912716	-0.176755	0.276027	-0.297009	0.043604
1	PFI0635c||PF3D7_0913000||conserved Plasmodium protein, unknown function	1.25442	1.29031	0.840247	-0.057582	-0.599193	0.057582	-0.61961	-0.775385	0.628859	0.334381	-0.600438	-1.16311	0.27239	0.470667	-0.27239	-1.54044	-1.85362	-1.23273	-1.45986	-0.717803	-0.356469	0.136286	0.328048	-0.377335
1	PF07_0066||PF3D7_0716000||conserved Plasmodium protein, unknown function	1.24595	0.616947	0.657646	-0.039505	-0.467448	-0.200452	0.039505	-0.283907	0.209795	0.099479	-0.10014	-1.27537	0.380596	-0.016413	0.016413	-1.65579	-1.7134	-0.817399	-0.618141	-0.244402	0.170801	-0.115892	0.116553	-0.380423
1	PFE0710w||PF3D7_0514200||conserved Plasmodium protein, unknown function	-0.153611	0.312144	0.741886	0.092422	-0.535601	-0.06486	0.06486	-0.449724	0.009676	0.062339	0.368947	-0.077992	-0.361455	-0.009676	0.568711	-0.217193	-0.38199	-0.377004	-0.677026	-0.542146	-0.371131	-0.072015	0.199764	-0.139201
1	MAL8P1.41||PF3D7_0823100||RWD domain-containing protein, putative	1.24641	1.34672	0.573064	-0.088884	-0.060527	0.060527	-0.339924	-0.191751	0.665358	0.683085	-0.385441	-1.38014	0.103013	0.407548	-0.103013	-1.47076	-1.30693	-1.28619	-0.912988	-0.102867	-0.562345	-0.275537	0.282428	-0.09062
1	PF14_0089-a||PF3D7_1409200||conserved Plasmodium protein, unknown function	0.42922	0.367934	0.660742	0.421808	-0.873819	-0.432177	-0.367934	-0.48161	-0.034245	0.02401	0.304693	-0.062942	0.146121	-0.02401	0.549963	-0.766693	-1.30304	-0.800111	-1.02868	-0.903418	0.180366	-0.04802	0.24527	-0.703751
1	PFL0825c-a||PF3D7_1217100||conserved Plasmodium protein, unknown function	0.20118	0.453305	-0.124532	0.581684	-0.774988	-0.426314	0.124532	-0.126714	0.17053	-0.146724	-0.756989	0.269452	0.207799	-0.266371	-0.706924	0.146724	-0.976168	-0.879619	0.249064	-0.708398	0.037269	-0.119647	0.050065	-0.122728
1	PF13_0175||PF3D7_1332500||conserved protein, unknown function	0.828889	2.03064	0.180431	0.622432	-0.286619	-0.180431	-0.989917	-0.786531	0.363646	-0.064933	-1.53047	0.239397	-0.219696	0.208492	-1.26332	0.064933	-1.11551	-2.21107	-1.17035	-1.40896	-0.583342	0.273425	0.267145	-0.174464
1	PFD1065c||PF3D7_0422600||conserved Plasmodium protein, unknown function	0.473899	0.585278	0.838418	0.104456	-0.104456	-0.258379	-0.835898	-0.182359	0.057415	-0.057415	0.222133	-0.884346	-0.189091	0.13082	0.158937	-0.608418	-0.578355	-0.843657	-1.67432	-0.286815	-0.246506	0.188235	-0.063196	0.275928
1	MAL7P1.117||PF3D7_0721800||conserved Plasmodium protein, unknown function	-0.016837	-0.20756	0.877042	-0.043736	-0.5202	0.18944	0.086516	0.016837	-0.290449	0.478357	1.02428	-0.313709	-0.480313	0.290449	0.957467	-0.322558	-0.503363	0.397	-0.790526	0.060573	-0.189864	-0.187908	-0.066817	-0.008849
1	PF14_0279||PF3D7_1430000||conserved Plasmodium protein, unknown function	0.117273	0.095157	0.012905	-0.250873	-0.955823	-0.012905	0.3649	-1.22437	0.028795	0.880584	-0.16864	-0.037462	-0.462232	0.696761	0.129927	-0.028795	-1.0731	-0.108062	0.351995	-0.973498	-0.491027	-0.183823	0.298567	0.008667
1	PFL2015w||PF3D7_1241900||Tetratricopeptide repeat protein, putative	0.277354	0.286698	0.621478	0.426075	-0.83433	-0.469682	-0.277354	-0.726046	0.166653	0.075105	-0.075105	-0.301022	0.386925	-0.088798	0.091646	-0.988343	-1.11168	-0.75638	-0.898832	-1.15212	0.220272	-0.163903	0.166751	-0.687321
1	PFE0580w||PF3D7_0511700||kinase binding protein CGI-121, putative	0.253014	0.831402	0.691422	0.768118	-0.253014	-0.565706	-0.404674	-0.737951	-0.004015	0.354055	-0.806879	0.004015	-0.583079	0.180117	-0.499184	0.198091	-0.506028	-1.39711	-1.0961	-1.50607	-0.579064	-0.173938	0.307695	0.194076
1	PF08_0099||PF3D7_0810000||acyl-CoA binding protein, putative	0.029202	0.320418	0.992474	0.152162	-0.487574	-0.251999	-0.029202	-0.40808	-0.090378	0.193491	0.249995	-1.13939	-0.809783	0.090378	0.343804	-1.15062	-0.516776	-0.572417	-1.02168	-0.560242	-0.719405	-0.103113	0.093809	-0.011235
1	PFE1215c||PF3D7_0524400||cytosolic preribosomal GTP-binding protein, putative	0.976374	1.07427	0.106864	-0.203548	-0.610007	0.177819	-0.106864	-1.22659	0.761254	0.241394	-0.400546	-0.507834	0.551705	0.649312	-0.241394	-0.709949	-1.58638	-0.896448	-0.213728	-1.02305	-0.209549	0.407918	0.159152	-0.202115
1	PF14_0643||PF3D7_1467500||conserved Plasmodium protein, unknown function	0.202338	0.293764	0.521967	-0.03112	-0.529301	-0.044099	0.03112	-0.388481	-0.113148	0.15849	0.291797	-0.901913	-0.288963	0.113148	0.216063	-0.883129	-0.731639	-0.337863	-0.490847	-0.357361	-0.175815	-0.045342	-0.075734	0.018784
1	PF10_0338||PF3D7_1034800||conserved Plasmodium protein, unknown function	0.21231	0.494842	0.924487	0.719572	-0.405718	-0.790146	-0.731768	-0.21231	-1.13559	0.118188	0.525715	-0.187992	-1.25814	0.126576	0.565442	-0.118188	-0.618028	-1.28499	-1.65625	-0.931882	-0.122552	0.008388	0.039727	0.069804
1	PF13_0055||PF3D7_1310300||conserved Plasmodium protein, unknown function	0.19258	1.29226	0.185979	1.09497	-0.501842	-0.388594	-0.423343	-0.185979	0.144625	-0.170977	-1.02944	0.597746	0.117564	-0.117564	-0.556985	0.318019	-0.694422	-1.68086	-0.609322	-1.28095	-0.027061	0.053413	0.472458	-0.279727
1	PFB0625w||PF3D7_0213800||conserved Plasmodium protein, unknown function	0.311464	0.635104	0.028126	0.65742	-0.381634	-0.672921	-0.471659	-0.028126	0.340409	-0.07609	-0.427648	0.528813	0.07609	-0.09969	-0.196632	0.262695	-0.693098	-1.30802	-0.499785	-0.685546	-0.264319	-0.0236	0.231016	-0.266118
1	PFF0370w||PF3D7_0607500||para-hydroxybenzoate--polyprenyltransferase (4- hydroxybenzoate octaprenyltransferase), putative	0.113367	0.323146	0.741842	-0.026037	-0.740097	-0.672419	0.026037	-0.597114	-0.171663	0.162621	0.300353	-0.295895	-0.37854	0.105389	0.501543	-0.105389	-0.853464	-0.995565	-0.715805	-0.571077	-0.206877	-0.057232	0.20119	0.190506
1	PFF1460c||PF3D7_0630100||conserved Plasmodium protein, unknown function	0.622996	1.18218	-0.028111	1.03686	-0.090286	-0.047758	0.028111	-0.26061	-0.009792	0.081002	-1.29425	0.881476	0.009792	-0.142219	-1.02166	0.52012	-0.713282	-1.22994	0.056222	-1.29747	0.019584	-0.223221	0.272585	-0.361356
1	PFI1525w||PF3D7_0931400||conserved Plasmodium protein, unknown function	0.140176	-0.535713	0.697069	0.002815	-0.929088	-0.002815	0.425107	-0.969558	-0.225849	0.15453	0.36668	-0.49426	0.086961	-0.086961	0.635724	-0.760486	-1.06926	0.532898	-0.271962	-0.972373	0.31281	-0.241491	0.269044	-0.266226
1	PF14_0783||PF3D7_1442100||conserved Plasmodium protein, unknown function	0.048176	-0.048176	1.24289	0.337316	-0.648798	-0.523184	0.137632	-0.467187	-0.820531	0.30347	0.913013	-0.311943	-1.19383	0.317237	1.13841	-0.30347	-0.696974	-0.475008	-1.10526	-0.804503	-0.373303	0.013767	0.225398	0.008473
1	PF14_0097||PF3D7_1409900||cytidine diphosphate-diacylglycerol synthase	0.491767	0.235071	0.36321	0.015668	-0.550453	-0.075193	-0.015668	-0.262457	-0.193329	0.193329	0.505687	-0.413078	-0.571965	0.543688	0.538585	-0.484991	-1.04222	-0.310264	-0.378878	-0.278125	-0.378636	0.350359	0.032898	-0.071913
1	PFI0285w||PF3D7_0905800||conserved Plasmodium protein, unknown function	0.857669	0.787913	0.345853	-0.032477	-0.273212	0.032477	-0.095802	-0.689104	-0.013868	0.189593	-0.134905	-0.630014	0.074524	0.051461	0.013868	-0.753739	-1.13088	-0.755436	-0.441655	-0.656627	0.088392	-0.138132	0.148773	-0.123725
1	PF10_0310||PF3D7_1031600||conserved Plasmodium protein, unknown function	0.245599	-0.119793	0.447317	-0.011795	-0.796759	0.011795	0.397771	-0.665937	-0.179092	0.158863	0.525745	-0.47058	-0.158863	0.164888	0.601395	-0.579142	-1.04236	0.131588	-0.049546	-0.654142	0.020229	0.006025	0.07565	-0.108562
1	PFE0295w||PF3D7_0506000||conserved Plasmodium protein, unknown function	0.671245	0.66816	0.577846	-0.023267	-0.59431	-0.590021	0.023267	-0.528596	0.101446	0.453185	-0.047942	-1.10334	-0.399696	0.576728	0.047942	-0.913636	-1.26555	-1.25818	-0.554579	-0.505329	-0.501142	0.123543	0.095884	0.189703
1	PFF0620c||PF3D7_0612800||6-cysteine protein	0.064657	0.178982	-0.064657	-0.547847	-0.575243	0.19533	0.511044	-0.802541	0.365189	0.421917	-0.210304	-0.664232	-0.013618	0.467477	0.013618	-0.476103	-0.6399	0.016348	0.575701	-0.254694	-0.378807	0.04556	0.223922	0.188129
1	PF10_0309||PF3D7_1031500||DEAD/DEAH box helicase, putative	-0.098434	0.490502	0.31696	0.098434	-0.422233	-0.321306	0.212747	-0.619548	0.334859	-0.379624	-0.003629	0.003629	0.288334	-0.039649	0.372104	-0.383018	-0.323799	-0.811808	-0.104213	-0.717982	-0.046525	0.339975	0.375733	-0.386647
1	PFC0515c||PF3D7_0312200||TPR domain containing protein	0.264708	0.07567	0.320878	0.319885	-0.537765	-0.799116	-0.18001	-0.07567	0.008974	-0.008974	0.259988	-0.027323	0.23368	-0.12253	0.307207	-0.034522	-0.802473	-0.874786	-0.500888	-0.395555	0.224706	-0.113556	0.047219	-0.007199
1	MAL13P1.225||PF3D7_1345100||thioredoxin 2	0.566146	1.61836	0.198847	0.878545	-0.737868	-0.198847	-1.14423	-1.48821	0.621132	-0.218202	-0.942645	0.377454	0.023555	0.136189	-0.779574	-0.023555	-1.30401	-1.81721	-1.34308	-2.36675	-0.597577	0.354391	0.163071	-0.401009
1	PF14_0309||PF3D7_1432700||protein-L-isoaspartate O-methyltransferase beta-aspartate methyltransferase, putative	0.759783	0.19164	0.804242	0.280803	-0.327194	-0.207824	-0.19164	-0.426862	-0.197873	0.018	0.233626	-0.308676	0.028483	-0.018	0.454954	-0.722571	-1.08698	-0.399464	-0.995882	-0.707665	0.226356	-0.036	0.221328	-0.413895
1	PFE0550w||PF3D7_0511100||conserved Plasmodium protein, unknown function	0.700652	0.812146	0.839835	0.13136	-0.13136	-0.241076	-0.784878	-0.152297	0.287372	0.138075	-0.067932	-0.591937	0.067932	0.430875	-0.154136	-0.390684	-0.832012	-1.05322	-1.62471	-0.283657	-0.21944	0.2928	-0.086204	0.201253
1	MAL7P1.86||PF3D7_0717300||transcription initiation factor IIE, alpha subunit, putative	0.371076	1.3921	0.841223	1.16272	-0.586627	-0.371076	-0.465679	-0.445293	0.064401	-0.249561	-0.682807	0.559297	0.389996	-0.064401	-0.215793	0.125713	-0.957703	-1.76318	-1.3069	-1.60802	0.325595	0.18516	0.467014	-0.433584
1	PFL1655c||PF3D7_1234300||DNA polymerase epsilon subunit b, putative	0.014069	0.093802	0.833971	0.267333	-0.642406	-1.22191	-0.014069	-0.154091	-0.449767	-0.177384	0.911547	0.133095	-0.700772	-0.133095	0.97445	0.31982	-0.656475	-1.31571	-0.84804	-0.421424	-0.251005	0.044289	0.062903	0.186725
1	PF11TR006||PF3D7_1139000||product unspecified	0.538839	1.15164	0.697767	-0.028255	-0.194634	-0.258234	-0.132076	0.028255	0.106405	0.468734	0.134168	-0.659776	-0.137356	0.649139	-0.106405	-0.170587	-0.733473	-1.40987	-0.829843	0.05651	-0.243761	0.180405	-0.240573	0.489189
1	PFI1505c||PF3D7_0931000||elongation factor Tu, putative	0.328033	0.376302	0.194431	0.013499	-0.611325	-0.013499	-0.311192	-0.709411	-0.028886	0.012894	-0.012894	-0.096674	0.508504	0.105295	0.045002	-0.419523	-0.939358	-0.389801	-0.505623	-0.72291	0.53739	0.092401	0.057896	-0.322849
1	PF14_0631||PF3D7_1466200||conserved Plasmodium protein, unknown function	1.01886	1.25778	0.403293	0.68407	-0.643146	-1.00886	-0.498311	-0.403293	0.409586	0.211461	-0.417217	-0.164263	0.369432	0.164263	-0.483022	-0.477742	-1.662	-2.26664	-0.901604	-1.08736	-0.040154	-0.047198	-0.065805	-0.313479
1	MAL13P1.304||PF3D7_1361200||conserved Plasmodium protein, unknown function	0.174462	0.044404	0.033698	-0.026248	-0.944951	0.026248	-0.03532	-1.01746	0.182383	0.082652	-0.02596	-0.176534	0.378206	0.02596	-0.166388	-0.620938	-1.11941	-0.018156	-0.069018	-0.991209	0.195823	-0.056692	-0.140428	-0.444404
1	PFL1920c||PF3D7_1239600||hydroxyethylthiazole kinase, putative	0.474803	0.225849	0.865456	0.134332	-0.544867	-0.542806	-0.524259	-0.134332	-0.889226	0.096214	0.654373	-0.383124	-1.05087	0.312617	0.812356	-0.096214	-1.01967	-0.768655	-1.38972	-0.268664	-0.161648	0.216403	0.157983	0.28691
1	RNAzID:2132||PF3D7_1424600||product unspecified	0.742833	0.905488	0.395978	-0.32046	-0.826354	-0.137704	0.137704	-0.825053	0.681212	0.854166	-0.46098	-0.769655	0.068096	1.0543	-0.068096	-0.557913	-1.56919	-1.04319	-0.258274	-0.504593	-0.613116	0.200133	0.392884	0.211742
1	MAL13P1.347||PF3D7_1368900||conserved Plasmodium protein, unknown function	0.755006	0.94778	0.763947	0.195955	-0.348114	-0.56341	-0.45604	-0.195955	0.002407	0.121126	-0.002407	-0.756533	-0.466579	0.210164	0.112415	-0.631386	-1.10312	-1.51119	-1.21999	-0.39191	-0.468986	0.089038	0.114822	0.125147
1	PFB0175c||PF3D7_0203700||nucleolar preribosomal assembly protein, putative	1.21408	0.99773	-0.069508	-0.228106	-0.310573	0.413971	0.069508	-0.745606	0.729348	0.468408	-0.786812	-0.755789	0.757247	0.701002	-0.468408	-1.02958	-1.52465	-0.583759	0.139016	-0.5175	0.027899	0.232594	0.318404	-0.273787
1	PFA0280w||PF3D7_0105700||asparagine-rich antigen Pfa35-2	0.217674	0.2744	0.89939	0.923239	-0.744041	-1.02677	-0.217674	-0.538451	-0.243212	-0.191421	0.672894	0.427293	0.024875	-0.405747	0.595081	-0.024875	-0.961715	-1.30117	-1.11706	-1.46169	0.268087	-0.214326	-0.077813	-0.452168
1	PF14_0775||PF3D7_1421000||conserved Plasmodium protein, unknown function	0.812212	1.23072	0.965885	0.406492	-0.438629	-0.453695	-0.960009	-0.406492	0.345665	0.04457	-0.217289	-1.03101	0.00074	0.165466	-0.00074	-0.940312	-1.25084	-1.68442	-1.92589	-0.812984	-0.344925	0.120896	0.216549	0.090702
1	PF13_0012a||PF3D7_1302300||Plasmodium exported protein, unknown function	-0.285114	0.401528	0.876308	0.285114	-0.922837	-0.360733	0.441086	-0.93345	0.172638	-0.112958	0.021756	0.044191	-0.269398	-0.021756	0.256447	-0.362453	-0.637723	-0.762261	-0.435222	-1.21856	-0.442036	0.091202	0.234691	-0.406644
1	PF14_0152||PF3D7_1415400||conserved Plasmodium protein, unknown function	0.765235	-0.047003	0.729296	0.047003	-0.823279	-0.388801	0.160774	-0.493756	-0.338495	0.477434	0.624728	-0.452576	0.051444	-0.051444	0.709008	-0.970253	-1.58851	-0.341798	-0.568522	-0.540759	0.389939	-0.528878	0.08428	-0.517677
1	PF14_0692||PF3D7_1472400||conserved Plasmodium membrane protein, unknown function	0.076754	0.360317	-0.065356	0.065356	-0.781333	-0.373088	0.274099	-0.836073	-0.023014	0.146529	0.180801	0.133442	-0.012155	0.002902	-0.050621	-0.002902	-0.858087	-0.733405	0.339455	-0.901429	0.010859	-0.143627	-0.231422	-0.136344
1	PFI1600w||PF3D7_0933000||mRNA processing protein, putative	0.286787	0.710852	0.003807	0.591882	-0.600261	-0.227376	-0.003807	-0.998165	0.191923	-0.139997	-0.070512	0.141728	0.266029	-0.008873	-0.187861	0.008873	-0.887048	-0.938228	-0.007614	-1.59005	0.074106	0.131124	-0.117349	-0.132855
1	MAL13P1.235||PF3D7_1347300||conserved Plasmodium membrane protein, unknown function	0.212615	0.581782	1.55589	0.809059	-0.212615	-0.309277	-0.41705	-0.227932	-0.056609	-0.13689	0.60777	-0.231462	-0.486623	0.265429	0.643556	0.056609	-0.42523	-0.891059	-1.97294	-1.03699	-0.430014	0.402319	0.035786	0.288071
1	PF13_0293||PF3D7_1355300||histone-lysine N-methyltransferase, putative	1.06097	1.62394	0.330372	0.272983	-0.277171	-0.272983	-0.464423	-0.717529	0.631811	0.350073	-0.647532	-0.583719	0.342521	0.496935	-0.342521	-0.795368	-1.33814	-1.89692	-0.794795	-0.990512	-0.28929	0.146862	0.305011	-0.211649
1	MAL13P1.253||PF3D7_1350200||small nuclear ribonucleoprotein, putative	0.234685	0.638703	0.57223	-0.410375	-0.777217	-0.096656	0.096656	-1.8323	0.333461	0.549583	-0.188356	-1.00165	-0.005809	0.42971	0.005809	-1.35438	-1.0119	-0.735359	-0.475574	-1.42193	-0.33927	-0.119873	0.194165	-0.352736
1	PFL0635c||PF3D7_1212900||bromodomain protein, putative	0.279918	1.00791	0.134069	0.525338	-1.26031	-0.134069	-0.466298	-1.84375	0.950351	0.068563	-0.525035	0.174108	1.20686	-0.222377	-0.068563	-0.621252	-1.54022	-1.14198	-0.600367	-2.36909	0.256504	-0.29094	0.456472	-0.79536
1	PFE0160c||PF3D7_0503300||Ser/Arg-rich splicing factor, putative	0.59919	0.053016	0.368758	-0.134516	-0.992755	0.064529	-0.053016	-1.03671	-0.03218	0.199242	-0.017819	-0.919835	0.189129	0.017819	0.294051	-1.75936	-1.59194	0.011513	-0.421774	-0.902192	0.221309	-0.181423	0.31187	-0.839525
1	PFE0105c||PF3D7_0502100||HCNGP-like protein	0.329237	0.487571	1.12798	0.848758	-0.755586	-0.329237	-0.45179	-0.570219	-0.458203	0.043972	0.222226	0.136493	-0.233272	-0.043972	0.221307	-0.219635	-1.08482	-0.816808	-1.57977	-1.41898	0.224931	-0.087944	-0.000919	-0.356128
1	PF14_0645||PF3D7_1467700||conserved Plasmodium protein, unknown function	0.674391	1.65146	1.47136	0.493537	-0.642188	-0.829774	-0.562107	-0.493537	0.153829	0.058696	0.026246	-0.969154	-0.399443	0.100679	-0.026246	-1.18492	-1.31658	-2.48123	-2.03346	-0.987074	-0.553272	0.041983	-0.052492	-0.215765
1	PFL1190c||PF3D7_1224700||conserved Plasmodium protein, unknown function	0.010964	0.746009	0.769033	1.28929	-0.414753	-0.716429	-0.010964	-0.054043	0.062161	-0.512718	0.018745	0.157978	0.199276	-0.41755	-0.038014	-0.018745	-0.425717	-1.46244	-0.779997	-1.34334	0.137115	0.095168	-0.056759	-0.176723
1	PF14_0454||PF3D7_1447800||conserved Plasmodium protein, unknown function	0.672747	0.505412	0.514387	0.151212	-0.570422	-0.354538	-0.276713	-0.151212	0.0053	0.314423	-0.056548	-0.163818	0.538702	-0.0053	0.19712	-0.431502	-1.24317	-0.85995	-0.7911	-0.302424	0.533402	-0.319723	0.253668	-0.267684
1	PF14_0034||PF3D7_1403700||translocation associated membrane protein, putative	0.3155	0.25774	0.418832	0.323434	-0.968553	-0.875856	-0.464359	-0.25774	0.108934	-0.097573	0.266641	-0.058767	0.058767	-0.072041	0.26234	-0.254906	-1.28405	-1.1336	-0.883191	-0.581174	-0.050167	0.025532	-0.004301	-0.196139
1	MAL13P1.310||PF3D7_1362400||calpain	0.200399	0.874852	0.465417	0.798185	-0.331874	-0.287316	-0.645985	-0.200399	0.433705	-0.134323	-0.01816	0.338563	0.560683	0.01816	-0.07332	-0.048955	-0.532273	-1.16217	-1.1114	-0.998584	0.126978	0.152483	-0.05516	-0.387518
1	PF11_0368a||PF3D7_1135700||conserved Plasmodium protein, unknown function	1.25997	1.64295	1.15604	0.285321	-0.570492	-0.285321	-0.907015	-0.997611	0.49866	0.370286	-0.61446	-1.33394	0.28639	0.587019	-0.28639	-1.59576	-1.83046	-1.92827	-2.06306	-1.28293	-0.21227	0.216733	0.32807	-0.261824
1	PF11_0149-a||PF3D7_1114100||rhomboid protease ROM1	-0.074151	0.41526	0.074151	0.536601	-0.48721	-0.23605	0.476533	-0.421423	0.170384	-0.394837	-0.159771	1.12002	0.017809	-0.017809	-0.140663	1.08738	-0.413059	-0.65131	0.402382	-0.958024	-0.152575	0.377028	0.019108	-0.032638
1	PF08_0012||PF3D7_0827800||SET domain protein, putative	0.153462	0.288148	0.686496	0.311545	-0.974177	-0.777075	-0.153462	-0.402834	0.103213	-0.271591	0.463264	-0.103213	0.345356	-0.404538	0.420604	-0.540355	-1.12764	-1.06522	-0.839958	-0.714379	0.242143	-0.132947	-0.04266	-0.437142
1	PF10_0112||PF3D7_1011500||conserved Plasmodium membrane protein, unknown function	0.103375	1.10764	-0.356058	0.529914	-0.616029	-0.103375	0.267028	-0.671818	0.087229	-0.100104	-0.558057	0.950638	-0.087229	0.253075	-0.551358	0.646156	-0.719404	-1.21101	0.623086	-1.20173	-0.174458	0.353179	0.006699	-0.304482
1	PF14_0713||PF3D7_1474500||conserved Plasmodium protein, unknown function	0.24724	0.619966	0.298929	0.356405	-1.22974	-0.544445	-0.24724	-1.27771	-0.052042	0.151912	0.007213	-0.16877	-0.007213	0.049298	0.13055	-0.709527	-1.47698	-1.16441	-0.546169	-1.63412	0.044829	-0.102614	0.123337	-0.540757
1	PFF1355w||PF3D7_0627900||conserved Plasmodium protein, unknown function	0.072319	0.62962	-0.062358	0.062358	-0.475413	-0.363455	0.287419	-0.643805	0.072008	0.11564	-0.423905	-0.023059	-0.040596	0.03758	0.023059	-0.258366	-0.547732	-0.993075	0.349777	-0.706163	-0.112604	-0.07806	0.446964	-0.235307
1	PF07_0026||PF3D7_0707700||ubiquitin-protein ligase e3, putative	0.538556	1.16093	1.08479	1.19251	-0.599511	-0.558244	-0.738297	-0.538556	0.004607	-0.247169	-0.086801	0.769556	0.250766	-0.213594	-0.004607	0.01957	-1.13807	-1.71917	-1.82309	-1.73107	0.246159	0.033575	0.082194	-0.749986
1	PFL0765w||PF3D7_1215900||conserved Plasmodium membrane protein, unknown function	0.357457	0.941741	1.2942	0.358951	-0.765758	-0.464011	-0.357457	-0.440931	-0.000903	0.000903	0.652332	-0.451108	-0.267283	0.105335	0.394037	-0.459713	-1.12322	-1.40575	-1.65165	-0.799882	-0.26638	0.104432	-0.258295	-0.008605
1	PFI0450c||PF3D7_0909300||apoptosis-related protein, putative	1.16446	1.36045	0.816933	0.054823	-0.139967	-0.054823	-0.32354	-0.377153	0.482466	0.216104	-0.599853	-1.42678	0.133614	0.334668	-0.133614	-1.57232	-1.30443	-1.41528	-1.14047	-0.431976	-0.348852	0.118564	0.466239	-0.145539
1	PFE0595w||PF3D7_0512000||prefoldin subunit, putative	0.406144	-0.072856	0.289225	-0.479696	-1.11693	0.072856	0.69293	-1.0023	-0.002741	0.250169	0.002741	-1.30002	-0.175474	0.259359	0.138405	-1.58553	-1.52308	0.145712	0.403705	-0.522606	-0.172733	0.00919	0.135664	-0.285513
1	PFA0120c||PF3D7_0102400||lysophospholipase, putative	0.185036	0.718878	0.684905	0.816396	-0.619231	-1.0543	-0.352144	-0.185036	-0.592818	-0.232481	0.386362	0.792892	-0.267919	-0.237929	0.232481	0.827339	-0.804267	-1.77318	-1.03705	-1.00143	0.324899	-0.005448	-0.153881	0.034447
1	PFI0495w||PF3D7_0910200||conserved Plasmodium protein, unknown function	-0.096464	0.359945	0.875949	0.598245	-0.822669	-0.223841	0.096464	-0.737356	0.001434	-0.001434	0.351547	-0.107113	0.265258	-0.235833	0.33286	-0.592401	-0.726205	-0.583786	-0.779485	-1.3356	0.263824	-0.234399	-0.018687	-0.485288
1	PFL0623c-a||PF3D7_1212600||conserved Plasmodium membrane protein, unknown function	-0.010128	-0.122678	0.811315	0.010128	-0.601751	0.049969	0.948747	-0.241161	-0.247886	0.247886	0.452868	-0.586109	-0.726822	0.365227	0.517709	-0.289496	-0.591623	0.172647	0.137432	-0.251289	-0.478936	0.117341	0.064841	0.296613
1	PFL2165w||PF3D7_1245100||kinesin-like protein, putative	0.691236	0.484795	1.05505	0.741974	-0.484795	-0.588933	-0.632864	-0.649247	0.314526	-0.389333	0.528041	-0.314526	0.448449	-0.375833	0.596047	-0.646147	-1.17603	-1.07373	-1.68792	-1.39122	0.133923	0.0135	0.068006	-0.331621
1	PFF0655c||PF3D7_0613500||adapter-related protein, putative	0.423083	0.075952	0.37489	0.186193	-0.611155	-0.534988	-0.075952	-0.452805	-0.608793	0.257376	0.513912	-0.010917	-0.445109	0.010917	0.41094	-0.232332	-1.03424	-0.61094	-0.450842	-0.638998	0.163684	-0.246459	-0.102972	-0.221415
1	PFL0585w||PF3D7_1211800||polyubiquitin	0.63901	2.40442	1.81093	1.50502	-0.63901	-0.876994	-1.10754	-0.643325	0.079621	-0.22097	-0.013176	0.630365	-0.273237	0.013176	0.247291	-0.172347	-1.27802	-3.28141	-2.91847	-2.14835	-0.352858	0.234146	0.260467	-0.802712
1	PFC0535w||PF3D7_0312800||60S ribosomal protein L26, putative	1.73533	1.71496	1.49182	0.060725	-1.05925	-0.060725	-0.661652	-1.44683	0.206444	-0.01392	-0.379779	-1.20891	0.01392	0.582082	0.192521	-1.94922	-2.79458	-1.77569	-2.15347	-1.50755	-0.192524	0.596002	0.5723	-0.740314
1	PFA0300c||PF3D7_0106100||vacuolar ATP synthase subunit c, putative	0.075747	0.149966	0.227383	0.079489	-1.1641	-0.479317	-0.075747	-1.54416	-0.403635	0.050181	0.174168	0.020448	-0.493684	-0.020448	0.372611	-0.194838	-1.23985	-0.629283	-0.30313	-1.62365	-0.090049	-0.070629	0.198443	-0.215286
1	PF10_0213||PF3D7_1021900||conserved Plasmodium protein (10b antigen), unknown function	0.208928	-0.208928	1.13853	0.754701	-0.749294	-0.560419	0.531825	-0.294608	-0.901471	-0.088071	1.32852	0.406408	-0.298786	-0.232438	0.981728	0.088071	-0.958222	-0.351491	-0.606706	-1.04931	0.602685	-0.144367	-0.346789	-0.318337
1	PFB0440c||PF3D7_0209700||conserved Plasmodium protein, unknown function	0.565557	2.17987	0.431053	1.14825	-0.88979	-0.431053	-1.21079	-1.31234	0.477315	-0.335737	-0.471329	0.48059	0.417624	0.032865	-0.487089	-0.032865	-1.45535	-2.61092	-1.64184	-2.4606	-0.059691	0.368602	-0.01576	-0.513455
1	PFA0630c||PF3D7_0113200||Plasmodium exported protein, unknown function	0.652836	-0.323613	0.250138	-0.105848	-0.748319	0.184442	0.105848	-0.254831	-0.526652	0.916684	0.21655	-0.262986	-0.349722	0.440532	0.195359	-0.195359	-1.40115	0.508055	-0.14429	-0.148983	0.17693	-0.476152	-0.021191	0.067627
1	PF07_0084||PF3D7_0720200||conserved Plasmodium protein, unknown function	1.37833	0.865346	0.498237	0.018982	-0.477085	-0.018982	-0.121294	-0.781848	0.484153	0.340368	-0.691838	-1.15293	0.235627	0.472736	-0.235627	-1.35882	-1.85542	-0.884328	-0.619531	-0.80083	-0.248526	0.132368	0.456211	-0.205891
1	PF14_0154||PF3D7_1415600||conserved Plasmodium protein, unknown function	0.455455	0.466505	0.734325	0.148679	-0.991107	-0.148679	-0.189289	-1.33952	-0.328244	0.31906	0.223478	-0.623628	-0.223478	0.403701	0.314468	-0.550155	-1.44656	-0.615184	-0.923614	-1.48819	0.104766	0.084641	0.09099	0.073473
1	PFL1540c||PF3D7_1232000||phenylalanyl-tRNA synthetase alpha chain, putative	0.271128	0.074333	0.79919	-0.074333	-0.644793	-0.473005	0.388254	-0.555684	-0.557795	0.467464	0.594637	-0.413033	-0.744877	0.413033	0.575236	-0.524347	-0.915921	-0.547338	-0.410936	-0.481351	-0.187082	-0.054431	-0.019401	-0.111314
1	PF14_0699||PF3D7_1473100||GTPase activator, putative	0.298416	0.279676	0.535799	-0.149764	-0.683798	-0.50059	0.149764	-0.706794	0.081446	0.129916	0.19556	-0.613128	-0.145496	-0.081446	0.185445	-0.784593	-0.982214	-0.780266	-0.386035	-0.55703	-0.226942	-0.211362	-0.010115	-0.171465
1	PFE0170c||PF3D7_0503500||protein kinase, putative	0.724696	1.13863	0.298892	0.660125	-0.447152	-0.369051	-1.09923	-0.298892	0.015387	0.49038	-0.69431	0.024235	-0.015387	0.44091	-0.408399	-0.187048	-1.17185	-1.50768	-1.39812	-0.959017	-0.030774	-0.04947	0.285911	-0.211283
1	PF11_0485||PF3D7_1147700||mitochondrial ATP synthase delta subunit, putative	0.001921	-0.001921	0.888502	0.611046	-0.714533	-0.456728	0.420507	-0.385459	-0.175766	-0.199488	0.734951	0.175766	-0.386273	-0.176539	0.820289	0.253971	-0.716454	-0.454807	-0.467995	-0.996505	-0.210507	0.022949	0.085338	0.078205
1	PFE1595c||PF3D7_0532200||Plasmodium exported protein (PHISTc), unknown function	0.475917	1.2466	0.870621	0.869433	-0.848713	-0.603185	-0.556657	-0.475917	0.258252	0.143908	-0.008975	-0.45584	0.008975	0.282422	-0.041448	-0.310626	-1.32463	-1.84979	-1.42728	-1.34535	-0.249277	0.138514	-0.032473	0.145214
1	PFE1550w||PF3D7_0531000||conserved Plasmodium protein, unknown function	0.53226	0.92254	0.839769	0.527938	-0.929459	-0.665252	-0.527938	-0.779593	0.073724	0.118321	0.138945	-0.461822	-0.161165	-0.055226	0.055226	-0.519876	-1.46172	-1.58779	-1.36771	-1.30753	-0.234889	-0.173547	-0.083719	-0.058054
1	PF13_0346||PF3D7_1365900||60S ribosomal protein L40/UBI, putative	0.73699	1.20426	0.857383	0.110331	-1.16001	-0.110331	-0.47315	-2.20489	0.165532	0.120726	-0.527002	-0.758787	0.082537	0.288326	-0.082537	-1.47107	-1.897	-1.31459	-1.33053	-2.31522	-0.082995	0.1676	0.444465	-0.712286
1	PF14_0395||PF3D7_1441600||acid cluster protein 33 homologue, putative	0.279683	1.19665	1.41261	1.22618	-0.591694	-0.805835	-0.279683	-0.287219	-0.557748	0.033369	-0.033369	0.280198	-0.467859	-0.179966	0.101624	0.225413	-0.871377	-2.00248	-1.69229	-1.51339	0.089889	-0.213335	0.134993	-0.054785
1	PFE1395c||PF3D7_0528000||conserved Plasmodium protein, unknown function	0.098819	0.616335	0.949745	0.242457	-1.20866	-0.640041	-0.098819	-0.880617	0.008435	-0.008435	0.334755	-0.385262	-0.334492	0.250728	0.540135	-1.15033	-1.30748	-1.25638	-1.04856	-1.12307	-0.342927	0.259163	0.20538	-0.765067
1	PF14_0735||PF3D7_1476500||probable protein, unknown function	0.676464	1.13617	0.380839	0.905747	-1.17257	-0.844725	-1.20274	-0.380839	0.6761	0.113259	-0.579647	0.042003	0.767956	-0.042003	-0.098975	-0.711612	-1.84903	-1.98089	-1.58357	-1.28659	0.091856	-0.155262	0.480672	-0.753615
1	PF08_0083||PF3D7_0813000||conserved Plasmodium protein, unknown function	0.821847	1.42072	-0.052866	0.26879	-0.664354	0.052866	-1.09718	-1.37254	0.939549	-0.27989	-0.969073	0.28114	0.636301	0.27989	-0.913031	-0.291778	-1.4862	-1.36785	-1.04431	-1.64133	-0.303248	0.55978	0.056042	-0.572918
1	PF14_0048||PF3D7_1405100||conserved Plasmodium protein, unknown function	0.471536	0.38554	0.010863	-0.010863	-0.895176	0.016871	-0.059293	-0.791025	0.062576	0.340864	-0.184953	-0.143248	0.251963	0.367497	-0.062576	-0.194052	-1.36671	-0.368669	-0.070156	-0.780162	0.189387	0.026633	0.122377	-0.050804
1	PF14_0033||PF3D7_1403600||selenoprotein	0.61787	0.463236	0.910836	0.435983	-0.9247	-0.587722	-0.435983	-0.590081	-0.001528	-0.037485	0.332484	-0.182096	0.001528	0.037776	0.653821	-0.588666	-1.54257	-1.05096	-1.34682	-1.02606	0.003056	0.075261	0.321337	-0.40657
1	PF14_0175||PF3D7_1417600||conserved Plasmodium protein, unknown function	0.329742	0.542072	-0.132898	0.101035	-1.09224	-0.101035	0.170142	-1.25784	0.256873	0.251915	-0.395068	-0.037382	0.594239	0.037382	-0.487178	-0.553429	-1.42198	-0.643107	0.30304	-1.35887	0.337366	-0.214533	-0.09211	-0.516047
1	PFL2105c||PF3D7_1243800||microtubule associated katanin, putative	0.317815	1.1099	0.224119	0.815051	-0.364012	-0.295717	-0.224119	-0.280229	0.092525	-0.092525	-0.553376	0.109052	-0.135673	0.118562	-0.368607	0.468502	-0.681827	-1.40561	-0.448238	-1.09528	-0.228198	0.211087	0.184769	0.35945
1	PF11_0218||PF3D7_1121100||conserved Plasmodium protein, unknown function	-0.298642	0.29743	0.696449	0.788463	-0.80398	-0.131234	0.131234	-0.575506	0.202665	-0.197363	0.043205	0.130576	0.466717	-0.520358	-0.043205	-0.531174	-0.505338	-0.428664	-0.565215	-1.36397	0.264052	-0.322995	-0.08641	-0.66175
1	PFA0395w||PF3D7_0107900||conserved Plasmodium protein, unknown function	0.718197	0.46243	0.488569	-0.394272	-1.29754	-0.020195	0.020195	-0.812653	-0.084723	0.619552	0.127491	-1.04392	0.007335	0.492146	-0.007335	-1.37137	-2.01574	-0.482625	-0.468374	-0.418381	0.092058	-0.127406	-0.134826	-0.327451
1	PFE1075c||PF3D7_0521400||conserved Plasmodium protein, unknown function	0.333695	-0.035895	0.986769	0.035895	-0.898947	-0.783984	0.172394	-0.526171	-0.495294	0.682043	0.867046	-0.587507	-0.690353	0.495294	1.18942	-0.589347	-1.23264	-0.748089	-0.814375	-0.562066	-0.195059	-0.186749	0.322373	-0.00184
1	MAL13P1.24||PF3D7_1304300||conserved Plasmodium protein, unknown function	0.609579	1.26313	0.822272	0.748946	-0.750405	-0.776834	-0.760177	-0.609579	0.063804	-0.063804	-0.512998	0.507234	-0.515847	0.17726	-0.125277	0.58099	-1.35998	-2.03997	-1.58245	-1.35852	-0.579651	0.241064	0.387721	0.073756
1	PF14_0501||PF3D7_1452600||conserved Plasmodium protein, unknown function	-0.139794	0.231625	0.312227	0.526802	-0.86319	-0.275068	0.139794	-0.385223	-0.075861	0.099682	0.12868	0.213969	-0.074931	-0.023282	-0.024523	0.023282	-0.723396	-0.506693	-0.172433	-0.912025	0.00093	-0.122964	-0.153203	-0.190687
1	PFL2055w||PF3D7_1242700||40S ribosomal protein S17, putative	1.33905	1.57014	1.20882	-0.109125	-1.53491	0.109125	-0.132505	-2.33171	0.524903	0.410568	-0.768435	-1.60391	0.038723	0.669303	-0.038723	-2.19385	-2.87395	-1.46102	-1.34132	-2.22259	-0.48618	0.258735	0.729712	-0.589932
1	PF14_0673||PF3D7_1470600||RAP protein, putative	0.687122	0.623656	0.718441	0.305972	-1.0189	-0.421997	-0.305972	-0.552961	-0.019935	0.493176	-0.029055	-0.951439	0.069756	0.232554	0.019935	-1.37044	-1.70602	-1.04565	-1.02441	-0.858933	0.089691	-0.260622	0.04899	-0.419
1	PFL2140c||PF3D7_1244600||ADP-ribosylation factor GTPase-activating protein, putative	-0.151572	0.473959	0.698667	0.717392	-0.803682	-0.007803	0.007803	-1.2875	0.17378	-0.559024	0.062824	-0.028835	0.089799	-0.48253	0.015121	-0.015121	-0.65211	-0.481762	-0.690864	-2.0049	-0.083981	0.076494	-0.047703	0.013714
1	MAL7P1.37||PF3D7_0711400||sin3 associated polypeptide p18-like protein	0.498027	-0.674831	0.094215	-0.044564	-1.00013	0.044564	0.518601	-0.407243	-0.278923	0.676609	0.673628	-0.558076	-0.315118	0.278923	0.788455	-0.756434	-1.49816	0.719395	0.424386	-0.362679	-0.036195	-0.397686	0.114827	-0.198358
1	MAL13P1.63||PF3D7_1312900||eukaryotic translation initation factor 4 gamma, putative	0.285569	0.719635	0.487259	0.973284	-0.898886	-0.285569	-0.33549	-0.978048	-0.018944	0.049786	-0.172362	0.406478	0.285675	-0.33124	0.018944	-0.314754	-1.18446	-1.0052	-0.822749	-1.95133	0.304619	-0.381026	0.191306	-0.721232
1	PFF1455c||PF3D7_0630000||CPW-WPC family protein	0.602005	0.342288	0.589297	0.200187	-1.04691	-0.35366	-0.371187	-0.200187	-0.047922	-0.113418	0.047922	-0.421082	0.177637	0.118989	0.156898	-0.814798	-1.64891	-0.695948	-0.960484	-0.400374	0.225559	0.232407	0.108976	-0.393716
1	PFI1330c||PF3D7_0927100||conserved Plasmodium protein, unknown function	0.277205	-0.12252	0.625865	0.12252	-1.05971	-0.577118	0.530677	-0.72027	0.255523	0.012688	0.524873	-0.108763	-0.223144	-0.065074	0.861994	-0.012688	-1.33692	-0.454598	-0.095188	-0.84279	-0.478667	-0.077762	0.337121	0.096075
1	PFI1420w||PF3D7_0928900||guanylate kinase	1.17412	0.910359	0.370518	-0.063207	-0.651713	-0.215937	0.063207	-0.553786	0.33819	0.879971	-0.291953	-0.600989	-0.02736	1.15849	0.02736	-0.542863	-1.82583	-1.1263	-0.307311	-0.490579	-0.36555	0.278519	0.319313	0.058126
1	MAL13P1.170||PF3D7_1332400||nucleotidyltransferase, putative	0.036191	1.09617	-0.133279	0.277189	-0.628003	0.287152	-0.036191	-1.09845	0.115775	-0.145072	-0.596544	0.681246	0.410445	-0.045524	-0.463268	0.045524	-0.664194	-0.809018	0.097088	-1.37564	0.29467	0.099548	0.133276	-0.635722
1	PF11_0285||PF3D7_1127400||conserved Plasmodium protein, unknown function	0.371676	0.277238	0.66461	-0.369112	-0.666964	-0.277238	0.367638	-0.442408	-0.316883	0.508937	0.316883	-1.14935	-0.722846	0.53957	0.54483	-1.2284	-1.03864	-0.554476	-0.296972	-0.073296	-0.405963	0.030633	0.227947	-0.079055
1	PFL1750c||PF3D7_1236200||conserved Plasmodium protein, unknown function	1.11087	1.58064	0.25064	0.773595	-1.18642	-0.849431	-0.25064	-1.10542	1.4328	-0.030158	-0.456821	0.121979	1.05324	0.030158	-0.104163	-0.703469	-2.29729	-2.43007	-0.50128	-1.87902	-0.379553	0.060316	0.352658	-0.825448
1	PFB0220w||PF3D7_0204900||ubiE/COQ5 methyltransferase, putative	0.05115	-0.05115	1.08296	0.437308	-1.12325	-0.752572	0.134697	-0.691167	-0.257448	0.077871	0.942243	0.122328	-0.508844	-0.086878	1.11671	-0.077871	-1.1744	-0.701422	-0.948268	-1.12847	-0.251396	-0.164749	0.174465	-0.200199
1	PFF0695w||PF3D7_0614400||conserved Plasmodium protein, unknown function	0.751707	0.927937	-0.085823	-0.240631	-0.87398	0.090584	0.085823	-1.01078	0.794644	0.370488	-0.832913	-1.08476	0.85915	0.415115	-0.370488	-1.68305	-1.62569	-0.837353	0.171646	-0.770152	0.064506	0.044627	0.462425	-0.598287
1	PFL1835w||PF3D7_1237900||conserved Plasmodium protein, unknown function	0.090204	0.778384	-0.493054	0.936966	-0.823814	-0.018135	0.018135	-0.584514	0.312433	-0.283596	-0.925264	0.819044	0.496736	-0.581574	-0.766531	0.283596	-0.914018	-0.796519	0.511189	-1.52148	0.184303	-0.297978	0.158733	-0.535448
1	PFA0560c||PF3D7_0111600||conserved Plasmodium protein, unknown function	0.364283	0.490166	0.617699	-0.211139	-1.05898	-0.182901	0.182901	-1.00768	-0.105527	0.324492	0.063756	-0.723229	-0.063756	0.246913	0.163772	-0.75398	-1.42326	-0.673067	-0.434798	-0.796546	0.041771	-0.077579	0.100016	-0.030751
1	PFA0385w||PF3D7_0107700||conserved Plasmodium membrane protein, unknown function	0.268319	0.19504	0.979196	0.181898	-0.777584	-0.899743	-0.181898	-0.291789	-0.094145	-0.068285	0.888431	-0.096256	-0.426037	0.074741	0.799526	0.068285	-1.0459	-1.09478	-1.16109	-0.473687	-0.331892	0.143026	-0.088905	0.164541
1	PF10_0293||PF3D7_1030000||transcription factor, putative	0.068542	0.797604	-0.009484	0.009484	-0.84537	-0.133091	0.21332	-1.10664	0.649838	0.261652	-0.332326	-0.464985	0.439322	0.304314	-0.261652	-0.556455	-0.913912	-0.930695	0.222804	-1.11612	-0.210516	0.042662	0.070674	-0.09147
1	PF14_0650||PF3D7_1468200||conserved protein, unknown function	0.500645	0.440885	1.39157	1.2003	-0.910685	-0.440885	-0.571998	-0.666293	-0.271371	0.345025	-0.029536	0.029536	-0.126241	0.305099	0.096812	-0.324101	-1.41133	-0.88177	-1.96357	-1.8666	0.14513	-0.039926	0.126348	-0.353637
1	PF11_0359||PF3D7_1134800||coatomer delta subunit, putative	0.488986	1.29711	1.16687	0.714422	-0.699964	-0.488986	-0.543022	-0.636999	0.238186	-0.023504	0.023504	-0.332835	-0.044642	0.115103	0.171575	-0.416867	-1.18895	-1.78609	-1.70989	-1.35142	-0.282828	0.138607	0.148071	-0.084032
1	MAL7P1.36||PF3D7_0711300||conserved Plasmodium protein, unknown function	0.426297	0.297754	0.536446	0.087336	-0.724829	-0.098382	-0.087336	-1.03935	0.419243	0.394479	-0.048932	-0.49151	0.019994	0.425379	-0.019994	-0.37564	-1.15113	-0.396136	-0.623782	-1.12669	-0.399249	0.0309	0.028938	0.11587
1	MAL8P1.83||PF3D7_0815600||eukaryotic translation initiation factor, putative	0.868439	1.03993	0.795205	-0.023675	-0.554137	-0.182517	0.023675	-0.612192	0.288996	0.103297	-0.380208	-1.38116	0.115955	0.312919	-0.103297	-1.60224	-1.42258	-1.22245	-0.77153	-0.588517	-0.173041	0.209622	0.276911	-0.221087
1	PF14_0266||PF3D7_1428700||conserved protein, unknown function	0.5945	0.054726	0.333351	-0.465691	-1.23175	-0.054726	0.239984	-0.778161	-0.245792	0.801022	0.245792	-0.798933	-0.37288	0.659633	0.349358	-0.678163	-1.82625	-0.109452	-0.093367	-0.31247	-0.127088	-0.141389	0.103566	0.12077
1	PF08_0128||PF3D7_0803000||SYF2 splicing factor, putative	0.503383	0.41008	0.525284	0.022724	-0.963228	-0.376774	-0.022724	-0.916889	0.253254	0.003804	-0.003804	-0.700507	0.402545	-0.140623	0.11523	-1.33134	-1.46661	-0.786854	-0.548008	-0.939613	0.149291	-0.144427	0.119034	-0.630833
1	PF13_0200||PF3D7_1335800||conserved Plasmodium protein, unknown function	0.10078	0.02197	1.34715	0.83663	-0.907755	-0.952631	-0.02197	-0.390466	-0.877543	0.309307	0.999935	0.119294	-0.676481	-0.119294	0.885248	-0.378109	-1.00853	-0.974601	-1.36912	-1.2271	0.201062	-0.428601	-0.114687	-0.497403
1	MAL13P1.298||PF3D7_1359900||conserved Plasmodium membrane protein, unknown function	0.293981	1.13244	0.601153	1.02165	-0.656323	-0.371797	-0.293981	-0.530003	0.404908	0.017438	-0.095202	0.216321	0.470286	-0.021644	-0.232704	-0.017438	-0.950304	-1.50423	-0.895134	-1.55166	0.065378	-0.039082	-0.137502	-0.233759
1	PF14_0083||PF3D7_1408600||40S ribosomal protein S8e, putative	1.38404	1.00472	0.827934	-0.609793	-1.14654	0.158258	-0.158258	-2.26471	0.06521	0.324152	-0.536764	-2.01472	-0.06521	0.679204	0.303445	-2.80755	-2.53058	-0.846461	-0.986192	-1.65491	-0.13042	0.355052	0.840209	-0.792837
1	PF13_0357||PF3D7_1368500||conserved Plasmodium protein, unknown function	0.282918	0.425925	0.634771	0.460799	-0.980592	-1.04928	-0.864609	-0.282918	-0.558052	-0.05589	0.235937	0.069504	-0.538597	-0.174759	0.05589	0.563321	-1.26351	-1.47521	-1.49938	-0.743717	0.019455	-0.118869	-0.180047	0.493817
1	PF14_0144||PF3D7_1414600||RNA guanylyltransferase	0.436576	0.96038	0.226591	0.712037	-0.90638	-0.226591	-0.315789	-1.03421	0.594637	0.274249	-0.452408	-0.119026	0.505913	0.119026	-0.437731	-0.196505	-1.34296	-1.18697	-0.54238	-1.74624	-0.088724	-0.155223	0.014677	-0.077479
1	PF07_0007||PF3D7_0702400||conserved Plasmodium protein, unknown function	1.93185	2.70632	0.022503	-0.098577	-0.672613	0.98568	-0.022503	-1.7956	1.45632	0.723078	-1.19014	-0.723078	1.40819	1.45097	-0.724102	-1.07905	-2.60446	-1.72064	-0.045006	-1.69702	-0.048133	0.727896	0.466038	-0.355974
1	PF07_0059||PF3D7_0715000||4-nitrophenylphosphatase	1.14473	1.48778	0.762481	-0.049764	-0.373029	-0.361239	0.049764	-0.462457	0.485752	0.366632	-0.368486	-1.32731	0.032058	0.393045	-0.032058	-1.43843	-1.51776	-1.84902	-0.712717	-0.412693	-0.453694	0.026413	0.336428	-0.111113
1	PFF1070c||PF3D7_0622200||radical SAM protein, putative	1.42087	1.41869	0.227402	-0.222026	-0.532918	0.033435	-0.033435	-0.487263	0.851828	0.485207	-0.485207	-1.15384	0.598515	0.765886	-0.542217	-1.50656	-1.95379	-1.38525	-0.260837	-0.265237	-0.253313	0.280679	-0.05701	-0.352715
1	PF14_0050||PF3D7_1405300||conserved Plasmodium protein, unknown function	-0.169226	0.548711	0.549021	0.184159	-0.974439	-0.513051	0.169226	-0.668453	-0.365683	0.088632	0.476901	-0.088489	-0.554176	0.088489	0.53686	-0.107066	-0.805213	-1.06176	-0.379795	-0.852612	-0.188493	-0.000143	0.059959	-0.018577
1	PF14_0697||PF3D7_1472900||dihydroorotase, putative	1.80184	2.13402	0.506115	1.09421	-0.532373	-0.506115	-0.591503	-0.786498	0.972864	0.306392	-0.461023	-0.306392	0.767053	0.377775	-0.517574	-0.759381	-2.33421	-2.64014	-1.09762	-1.88071	-0.205811	0.071383	-0.056551	-0.452989
1	PFE0990w||PF3D7_0519700||conserved Plasmodium protein, unknown function	0.931351	1.74546	1.15369	0.701153	-1.19811	-0.701153	-0.80376	-1.57207	0.55684	-0.096947	-0.278072	-0.478365	0.207416	0.096947	0.139563	-0.905402	-2.12946	-2.44661	-1.95745	-2.27322	-0.349424	0.193894	0.417635	-0.427037
1	PFL0045c||PF3D7_1200900||Plasmodium exported protein (PHISTc), unknown function	0.932913	1.35904	0.116039	0.048315	-0.708736	-0.048315	-0.333234	-1.38002	0.962148	0.582382	-0.889738	-0.810334	0.576128	0.603359	-0.576128	-1.1257	-1.64165	-1.40736	-0.449273	-1.42834	-0.38602	0.020977	0.31361	-0.315371
1	PF14_0301||PF3D7_1432100||conserved protein, unknown function	0.817542	1.50976	1.30375	0.647627	-1.46541	-0.776226	-0.647627	-1.35448	0.042841	-0.042841	0.23435	-0.481013	-0.224348	0.145037	0.107746	-0.734881	-2.28295	-2.28598	-1.95138	-2.00211	-0.267189	0.187878	-0.126604	-0.253868
1	PF14_0176||PF3D7_1417700||conserved Plasmodium protein, unknown function	0.243203	0.925933	1.06049	0.39745	-0.89409	-0.806563	-0.243203	-1.04595	-0.32531	0.080514	0.671813	-0.236432	-0.571349	0.204597	0.415571	-0.080514	-1.13729	-1.7325	-1.3037	-1.4434	-0.246039	0.124083	-0.256242	0.155918
1	PFD0165w||PF3D7_0403500||ubiquitin specific protease, putative	0.259103	0.401851	0.875498	0.313755	-1.04967	-0.596024	-0.259103	-0.498734	-0.448528	0.453467	0.402093	-0.098708	-0.612501	0.098708	0.564142	-0.154074	-1.30878	-0.997875	-1.1346	-0.812489	-0.163973	-0.354759	0.162049	-0.055366
1	MAL13P1.336||PF3D7_1366900||conserved Plasmodium protein, unknown function	0.412264	0.080604	0.506651	-0.065271	-1.00705	-0.353227	0.065271	-1.02921	0.01041	-0.106264	0.0975	-0.58197	0.464978	-0.01041	0.258605	-1.11472	-1.41931	-0.433831	-0.44138	-0.963941	0.454568	0.095854	0.161105	-0.532746
1	PFF0250w||PF3D7_0605100||RNA binding protein, putative	0.666307	1.25185	0.848079	0.645877	-1.0657	-0.645877	-0.965762	-1.22769	-0.163768	0.161544	-0.12608	0.217115	-0.044071	0.249508	-0.123405	0.044071	-1.73201	-1.89772	-1.81384	-1.87356	0.119697	0.087964	0.002675	-0.173044
1	MAL13P1.91||PF3D7_1317700||conserved Plasmodium protein, unknown function	1.03634	1.27683	0.638034	0.100008	-0.589156	-0.149817	-0.100008	-0.720133	0.539541	0.714176	-0.319649	-0.840688	0.305822	0.597042	-0.305822	-0.803513	-1.6255	-1.42665	-0.738042	-0.820141	-0.233719	-0.117134	0.013827	0.037175
1	PF07_0080||PF3D7_0719700||40S ribosomal protein S10, putative	1.27834	1.05011	0.685211	-0.59616	-1.6163	0.129134	-0.129134	-2.29991	0.13162	0.261943	-0.362271	-1.81828	-0.13162	0.894536	0.146805	-2.04864	-2.89464	-0.92098	-0.814345	-1.70375	-0.26324	0.632593	0.509076	-0.23036
1	PF10_0078||PF3D7_1008000||histone deacetylase, putative	-0.007883	0.27229	0.70328	0.400134	-0.943984	-0.104457	0.007883	-0.81732	0.153298	0.17184	0.15478	-0.205707	-0.168564	-0.031828	0.031828	-0.488809	-0.936101	-0.376747	-0.695397	-1.21745	-0.321862	-0.203668	-0.122952	-0.283102
1	PF11_0242||PF3D7_1123100||calcium-dependent protein kinase 7	0.018866	0.296078	0.39197	0.72183	-1.01251	-0.620027	-0.018866	-1.05488	-0.009378	0.009378	0.046157	0.188974	0.420651	-0.170515	-0.250866	-0.19061	-1.03137	-0.916105	-0.410836	-1.77671	0.430029	-0.179893	-0.297023	-0.379584
1	PFL2270w||PF3D7_1247300||conserved protein, unknown function	0.226914	1.07269	0.025102	0.122292	-0.785551	-0.608378	-0.025102	-0.567202	0.156459	-0.080147	-0.6541	0.080147	-0.276863	0.16541	-0.499885	0.087679	-1.01246	-1.68107	-0.050204	-0.689494	-0.433322	0.245557	0.154215	0.007532
1	PFC0635c||PF3D7_0315100||translation initiation factor 4E	0.874506	2.01181	0.731508	0.653593	-1.03328	-0.653593	-0.803267	-1.29794	0.307124	0.072252	-0.125864	-0.796254	0.10059	0.263998	-0.072252	-0.887431	-1.90779	-2.66541	-1.53478	-1.95154	-0.206534	0.191746	0.053612	-0.091177
1	PFE1235c||PF3D7_0524800||ubiquitin fusion degradation protein UFD1, putative	0.318402	0.997283	0.047267	1.1124	-0.754968	-0.230356	-0.047267	-0.744635	-0.002241	0.061406	-0.686843	0.773996	-0.044292	0.002241	-0.560257	0.692247	-1.07337	-1.22764	-0.094534	-1.85703	-0.042051	-0.059165	0.126586	-0.081749
1	PFL1225c||PF3D7_1225400||conserved Plasmodium protein, unknown function	1.06879	0.915653	-0.076579	0.076579	-0.732272	-0.346305	0.634941	-0.714344	0.722459	0.712351	-1.16878	-0.666393	0.936056	0.600106	-0.600106	-0.796887	-1.80106	-1.26196	0.71152	-0.790923	0.213597	-0.112245	0.56867	-0.130494
1	PFF0095c||PF3D7_0602000||conserved Plasmodium protein, unknown function	0.594446	0.061219	0.343131	0.309372	-1.06036	-1.01206	-0.061219	-0.403897	0.034878	-0.034878	0.196838	-0.138587	0.161719	-0.09291	0.048152	-0.215833	-1.65481	-1.07328	-0.40435	-0.713269	0.126841	-0.058032	-0.148686	-0.077246
1	PF10_0159||PF3D7_1016300||glycophorin binding protein	1.06349	0.069683	0.729665	-0.704392	-0.839527	-0.069683	0.713216	-0.200787	0.468939	-0.284936	0.915628	-1.15894	0.090683	-0.090683	1.30407	-1.90904	-1.90301	-0.139366	-0.016449	0.503605	-0.378256	0.194253	0.388437	-0.750102
1	MAL7P1.11||PF3D7_0703300||conserved Plasmodium protein, unknown function	0.728161	1.24644	1.58145	0.486413	-0.658487	-0.818597	-0.917763	-0.486413	-0.208556	0.750405	0.16728	-0.16728	-0.600201	0.543488	0.621977	-0.284073	-1.38665	-2.06504	-2.49922	-0.972826	-0.391645	-0.206917	0.454697	-0.116793
1	PF11_0095a||PF3D7_1108300||pterin-4a-carbinolamine dehydratase	-0.004603	0.004603	0.753859	0.778707	-1.36387	-0.609247	0.305659	-0.810833	-0.370009	-0.170063	0.297518	0.170063	-0.398208	-0.332616	0.441457	0.488985	-1.35927	-0.61385	-0.4482	-1.58954	-0.028199	-0.162553	0.143939	0.318922
1	PF13_0239||PF3D7_1344700||conserved Plasmodium protein, unknown function	-0.06765	0.655099	0.319617	0.06765	-0.879497	-0.216772	0.083762	-1.10905	-0.117147	-0.07405	0.21892	0.312888	0.060856	-0.060856	0.289699	-0.087635	-0.811847	-0.871871	-0.235855	-1.1767	0.178003	0.013194	0.070779	-0.400523
1	PF14_0549||PF3D7_1457600||conserved Plasmodium protein, unknown function	0.397332	0.805995	0.698648	0.393268	-0.909932	-0.719206	-0.393268	-0.882502	0.21845	0.175895	-0.21739	-0.23592	0.099411	0.189242	-0.099411	-0.304475	-1.30726	-1.5252	-1.09192	-1.27577	-0.119039	0.013347	0.117979	-0.068555
1	MAL7P1.164||PF3D7_0730200||adapter-related protein, putative	0.45874	1.37969	1.06999	0.536658	-0.879281	-1.02961	-0.45874	-1.1669	0.390226	-0.084898	0.068054	-0.665133	0.400503	-0.068054	0.112695	-0.627095	-1.33802	-2.4093	-1.52873	-1.70355	0.010277	0.016844	0.044641	0.038038
1	PFA0510w||PF3D7_0110500||bromodomain protein, putative	0.752223	0.619841	0.407903	0.052997	-0.860641	-0.48886	-0.052997	-0.619823	-0.446298	0.249637	-0.050235	-0.504885	0.057477	0.050235	0.189179	-0.955282	-1.61286	-1.1087	-0.4609	-0.67282	0.503775	-0.199402	0.239414	-0.450397
1	PF08_0097||PF3D7_0810400||conserved Plasmodium membrane protein, unknown function	0.599353	0.168188	0.438459	-0.071335	-0.933728	-0.250724	0.071335	-0.625613	-0.204025	0.73769	0.199232	-0.241075	-0.199232	0.555563	0.438757	-0.433073	-1.53308	-0.418912	-0.367124	-0.554278	0.004793	-0.182127	0.239525	-0.191998
1	PFC0265c||PF3D7_0306100||conserved Plasmodium protein, unknown function	0.37931	0.54916	0.865348	0.217973	-0.827939	-0.258301	-0.217973	-1.09467	-0.073922	0.295223	0.169145	-0.638188	-0.239924	0.073922	0.324247	-0.569457	-1.20725	-0.807461	-1.08332	-1.31264	-0.166002	-0.221301	0.155102	0.068731
1	PF13_0290||PF3D7_1354900||conserved Plasmodium protein, unknown function	0.229389	0.003811	0.851308	0.307556	-1.23242	-0.270536	-0.003811	-0.717423	-0.189212	0.081132	0.305978	-0.23787	0.076302	-0.076302	0.496736	-0.895164	-1.46181	-0.274347	-0.855119	-1.02498	0.265514	-0.157434	0.190758	-0.657294
1	PFL1075w||PF3D7_1222400||transcription factor with AP2 domain(s), putative	0.479842	-0.019826	0.820339	0.607399	-0.933562	-0.454507	0.019826	-0.743018	-0.533529	0.532072	1.04163	-0.179287	-0.145448	0.145448	0.800978	-0.491806	-1.4134	-0.434681	-0.800513	-1.35042	0.388081	-0.386624	-0.240655	-0.312519
1	PF14_0015||PF3D7_1401300||aminopeptidase, putative	1.92534	2.12859	0.118363	-0.118363	-0.58946	0.922945	-0.496426	-0.698734	0.226502	1.49161	-0.400892	-0.792835	0.245789	1.71206	-0.226502	-0.979648	-2.5148	-1.20565	-0.614789	-0.580371	0.019287	0.220456	0.17439	-0.186813
1	PFE1470w||PF3D7_0529500||cell cycle regulator protein, putative	0.871479	1.83275	1.20389	0.101791	-0.655141	-0.289602	-0.101791	-0.946871	0.544026	0.450051	-0.095056	-1.01805	0.039006	0.627198	-0.039006	-1.01485	-1.52662	-2.12236	-1.30568	-1.04866	-0.50502	0.177147	0.05605	0.003202
1	PF13_0336||PF3D7_1363500||DNase I-like protein, putative	-0.276855	0.252393	0.866382	0.631143	-1.0576	-0.147628	0.147628	-0.666523	-0.90465	0.17184	0.327236	0.031397	-1.07506	-0.229298	0.453268	-0.031397	-0.780741	-0.400021	-0.718754	-1.29767	-0.170413	-0.401138	0.126032	-0.062794
1	PF14_0528||PF3D7_1455400||hemolysin, putative	0.643657	1.49374	0.500823	0.088898	-0.936909	-0.657813	-0.088898	-1.89703	0.434387	0.208681	-0.178705	-0.790874	0.037211	0.582512	-0.037211	-0.458433	-1.58057	-2.15156	-0.589721	-1.98593	-0.397176	0.373831	0.141494	0.332441
1	PFL0595c||PF3D7_1212000||glutathione peroxidase	-0.024114	0.024114	1.2266	0.239191	-1.40471	-0.457166	0.178448	-0.755584	-0.555255	0.084987	1.02934	-0.440619	-0.582363	0.321682	1.43706	-0.084987	-1.3806	-0.48128	-1.04815	-0.994775	-0.027108	0.236695	0.407721	0.355632
1	PF14_0402||PF3D7_1442400||conserved Plasmodium protein, unknown function	0.334722	-0.033842	0.238796	0.418841	-1.23188	-0.043682	0.033842	-0.873093	-1.07091	0.278658	0.064534	-0.029029	-0.658649	0.143206	0.029029	-0.284124	-1.56661	-0.00984	-0.204954	-1.29193	0.412261	-0.135452	-0.035505	-0.255095
1	MAL7_ITS1||PF3D7_0725700||product unspecified	1.4865	1.1824	0.784816	0.015464	-1.352	-0.015464	-0.101643	-1.8783	-0.020311	0.380965	0.050848	-0.478137	-0.993603	0.805233	0.020311	-0.89454	-2.8385	-1.19787	-0.886459	-1.89377	-0.973292	0.424268	-0.030537	-0.416403
1	MAL8P1.58||PF3D7_0820200||phosphatidylglycerophosphate synthase	0.34679	0.543108	0.585968	0.580032	-0.906555	-0.617342	-0.34679	-0.660763	-0.121056	0.204353	0.164276	-0.342847	-0.291674	0.121056	0.199634	-0.146817	-1.25334	-1.16045	-0.932758	-1.24079	-0.170618	-0.083297	0.035358	0.19603
1	PF14_0267||PF3D7_1428800||transcription initiation TFIID-like, putative	0.683883	0.841822	1.08454	0.562431	-0.938488	-0.634151	-0.562431	-0.595978	-0.077489	0.09727	0.077489	-0.631939	-0.440941	0.141459	0.132128	-0.441506	-1.62237	-1.47597	-1.64697	-1.15841	-0.363452	0.044189	0.054639	0.190433
1	PFL1325c||PF3D7_1227400||conserved Plasmodium protein, unknown function	0.228644	0.471222	0.772795	0.601074	-0.995487	-0.377045	-0.228644	-1.02242	-0.015477	0.015477	0.263759	-0.047731	0.093405	-0.321322	0.151677	-0.319587	-1.22413	-0.848267	-1.00144	-1.6235	0.108882	-0.336799	-0.112082	-0.271856
1	PF14_0658||PF3D7_1469000||translation initiation factor EF-1, putative	0.099505	-0.00084	0.858577	0.00084	-1.05895	-0.108942	0.915878	-1.01236	-0.389149	0.403357	0.626753	-0.506745	-0.43509	0.351519	0.68363	-0.351519	-1.15845	-0.108102	0.057301	-1.0132	-0.045941	-0.051838	0.056877	0.155226
1	PF14_0636||PF3D7_1466800||conserved Plasmodium protein, unknown function	2.64418	1.63584	0.02367	0.428635	-0.768095	-0.353126	-0.02367	-1.06767	1.26774	0.456555	-1.0447	-0.983556	1.18013	0.819006	-0.456555	-0.938297	-3.41228	-1.98896	-0.04734	-1.49631	-0.087602	0.362451	0.588148	0.045259
1	PF14_0447||PF3D7_1446900||glutaminyl-peptide cyclotransferase, putative	0.865325	1.00705	1.19977	0.62966	-1.14469	-0.733343	-0.62966	-0.908063	-0.556967	0.357414	0.54972	-0.479245	-0.864012	0.519704	0.342003	-0.342003	-2.01002	-1.7404	-1.82943	-1.53772	-0.307045	0.16229	-0.207717	0.137242
1	PF07_0056||PF3D7_0714200||conserved Plasmodium protein, unknown function	0.397069	0.633224	0.845057	1.11972	-1.00902	-0.465867	-0.397069	-0.746538	0.006811	-0.06455	-0.006811	0.823936	0.080216	-0.146481	-0.078157	0.444323	-1.40609	-1.09909	-1.24213	-1.86626	0.073405	-0.081931	-0.071346	-0.379613
1	PFI0695c||PF3D7_0914200||phospholipid or glycerol acyltransferase, putative	0.701086	1.8096	0.452588	1.17468	-0.813541	-0.542725	-0.452588	-0.870735	0.33586	-0.238987	-1.00362	0.161815	0.113086	-0.064771	-1.01733	0.064771	-1.51463	-2.35232	-0.905176	-2.04542	-0.222774	0.174216	-0.01371	-0.097044
1	PFL1020w||PF3D7_1221200||conserved Plasmodium protein, unknown function	0.870778	0.99891	1.20731	0.313596	-1.72019	-0.653753	-0.313596	-1.20882	0.018318	0.558702	-0.018318	-1.02513	-0.302921	0.567323	0.334659	-1.07851	-2.59097	-1.65266	-1.52091	-1.52242	-0.321239	0.008621	0.352977	-0.053379
1	PF11_0259||PF3D7_1124800||nuclear preribosomal assembly protein, putative	1.65181	1.34991	0.469809	0.109073	-1.00108	-0.109073	-0.315283	-1.43308	0.571329	0.780597	-0.664802	-1.36388	0.425148	0.888722	-0.425148	-1.57035	-2.65289	-1.45899	-0.785092	-1.54215	-0.146181	0.108125	0.239654	-0.206471
1	PF10_0111||PF3D7_1011400||20S proteasome beta subunit, putative	0.245272	0.916553	1.54874	0.823421	-1.14746	-0.630058	-0.245272	-0.508614	-0.636682	0.135564	0.844601	-0.16544	-0.793408	0.527909	1.04671	-0.135564	-1.39273	-1.54661	-1.79401	-1.33203	-0.156726	0.392345	0.202105	0.029876
1	PF14_0312||PF3D7_1433100||conserved Plasmodium membrane protein, unknown function	0.016719	0.236982	0.458238	-0.016719	-1.21208	-0.235216	0.405984	-0.836528	-0.117281	0.20058	0.117281	-0.56881	-0.402151	0.132989	0.208059	-0.52221	-1.2288	-0.472198	-0.052254	-0.819809	-0.28487	-0.067591	0.090778	0.0466
1	PF10_0187||PF3D7_1019400||60S ribosomal protein L30e, putative	1.42915	1.83402	1.28287	0.05987	-1.0061	-0.05987	-0.620602	-1.48428	-0.086164	0.58752	0.086164	-1.46845	-0.451734	0.822171	0.260641	-1.53758	-2.43525	-1.89389	-1.90347	-1.54415	-0.36557	0.234651	0.174477	-0.069133
1	MAL8P1.77||PF3D7_0816700||conserved Plasmodium protein, unknown function	0.614668	0.490076	0.84807	0.006976	-1.2861	-0.81349	-0.006976	-0.632934	-0.242948	0.496214	0.242948	-0.480113	-0.53307	0.494344	0.441355	-0.52889	-1.90077	-1.30357	-0.855046	-0.63991	-0.290122	-0.00187	0.198407	-0.048777
1	PFE0810c||PF3D7_0516200||40S ribosomal protein S14, putative	1.95882	2.11723	1.05236	-0.029306	-1.09341	0.029306	-0.627981	-2.0793	0.332792	0.233957	-0.184224	-1.8573	-0.171421	0.902248	0.171421	-1.75773	-3.05223	-2.08792	-1.68034	-2.04999	-0.504213	0.668291	0.355645	0.099564
1	PF14_0499||PF3D7_1452400||conserved Plasmodium protein, unknown function	0.880343	0.754517	0.815399	0.164746	-1.05085	-0.378525	-0.164746	-1.00707	0.034994	0.18526	-0.034994	-1.00529	0.12486	0.037139	-0.096225	-1.41131	-1.93119	-1.13304	-0.980145	-1.17182	0.089866	-0.148121	-0.061231	-0.406017
1	PF14_0338-a||PF3D7_1435700||conserved Plasmodium protein, unknown function	0.47309	-0.054649	0.392319	0.054649	-1.31193	-0.846571	0.09605	-0.923412	-0.365536	0.101231	0.34699	-0.055813	-0.285766	0.055813	0.267416	-0.257429	-1.78502	-0.791922	-0.296269	-0.978061	0.07977	-0.045418	-0.079574	-0.201616
1	PF14_0294||PF3D7_1431500||mitogen-activated protein kinase 1	0.586645	-0.070111	0.560754	0.070111	-1.1814	-0.675013	0.163274	-0.289061	-0.309921	0.11872	-0.047798	-0.362801	0.135472	0.047798	0.465755	-1.01338	-1.76804	-0.604902	-0.39748	-0.359172	0.445393	-0.070922	0.513553	-0.650576
1	PF14_0477a||PF3D7_1450200||conserved Plasmodium protein, unknown function	0.672938	0.989166	0.267355	0.297787	-1.08666	-0.267355	-0.322402	-1.54337	0.502385	0.34221	-0.466293	-0.439821	0.237957	0.319012	-0.289443	-0.237957	-1.7596	-1.25652	-0.589757	-1.84116	-0.264428	-0.023198	0.17685	0.201864
1	PFC1020c||PF3D7_0322900||40S ribosomal protein S3A, putative	1.77144	1.67296	0.92768	-0.195995	-1.34186	0.195995	-0.373522	-2.04458	0.446082	0.321983	-0.171014	-1.80565	-0.182591	0.915933	0.171014	-1.91079	-3.1133	-1.47697	-1.3012	-1.84859	-0.628673	0.59395	0.342028	-0.105139
1	MAL8P1.63||PF3D7_0819500||conserved protein, unknown function	1.91394	0.895526	0.437761	0.096115	-0.760221	-0.096115	-0.253267	-0.265319	0.029568	1.37475	-0.130177	-0.569361	-0.029568	1.43747	0.141208	-0.625036	-2.67416	-0.991641	-0.691028	-0.361434	-0.059136	0.062719	0.271385	-0.055675
1	PFD0540c||PF3D7_0410900||conserved Plasmodium protein, unknown function	0.84944	0.167568	0.242812	0.117601	-1.19147	-0.117601	-0.15223	-0.600335	-0.046606	0.046606	-0.084733	-0.500081	0.348964	0.103577	0.249179	-0.970772	-2.04091	-0.285169	-0.395042	-0.717936	0.39557	0.056971	0.333912	-0.470691
1	PFC0670c||PF3D7_0315400||conserved Plasmodium protein, unknown function	-0.02474	0.02474	1.819	0.622768	-1.18699	-0.373849	0.512768	-0.653277	-0.962599	0.342502	1.25846	-0.224631	-0.953024	0.224631	1.35661	-0.544994	-1.16225	-0.398589	-1.30623	-1.27604	0.009575	-0.117871	0.098155	-0.320363
1	PF14_0637||PF3D7_1466900||rhoptry protein, putative	0.341508	0.179929	0.205624	0.007243	-1.41119	-0.290878	-0.007243	-1.1639	0.010301	0.412574	-0.092025	-0.431453	0.318249	0.293466	-0.010301	-0.805029	-1.7527	-0.470807	-0.212867	-1.17114	0.307948	-0.119108	0.081724	-0.373576
1	PF07_0120||PF3D7_0729100||conserved Plasmodium protein, unknown function	0.295914	0.25845	1.01893	0.418701	-1.19466	-1.30451	-0.25845	-0.56722	-0.282582	0.216898	1.022	-0.122798	-0.028711	0.028711	0.807054	-0.353289	-1.49058	-1.56296	-1.27738	-0.985921	0.253871	-0.188187	-0.214942	-0.230491
1	PF10_0046||PF3D7_1004300||zinc finger, C3HC4 type, putative	0.496682	0.762921	0.496951	0.185069	-1.10137	-0.185069	-0.342531	-0.775783	0.299939	-0.182077	0.11349	-0.167679	0.576089	-0.075409	0.075409	-0.568151	-1.59805	-0.94799	-0.839482	-0.960852	0.27615	0.106668	-0.038081	-0.400472
1	PF14_0221||PF3D7_1423000||GTPase, putative	1.03971	1.20517	0.549041	0.391476	-0.971847	-0.391476	-0.478613	-1.10602	0.524582	0.425876	-0.49562	-0.845071	0.513779	0.337019	-0.337019	-1.29527	-2.01156	-1.59665	-1.02765	-1.49749	-0.010803	-0.088857	0.158601	-0.450197
1	PFA0570w||PF3D7_0111800||conserved Plasmodium protein, unknown function	1.03934	0.258163	0.619175	-0.063603	-1.13173	-0.377932	0.063603	-0.732319	-0.380471	0.599717	0.275716	-0.636344	-0.275716	0.493686	0.437344	-0.936523	-2.17107	-0.636095	-0.555572	-0.668716	0.104755	-0.106031	0.161628	-0.300179
1	PFC0760c||PF3D7_0317300||conserved Plasmodium protein, unknown function	0.298692	0.780784	0.623172	0.78928	-1.14701	-0.365837	-0.298692	-0.965338	-0.026422	0.095189	0.026422	0.17458	0.368124	-0.169004	-0.12147	-0.393781	-1.4457	-1.14662	-0.921864	-1.75462	0.394546	-0.264193	-0.147892	-0.568361
1	PFD0405c||PF3D7_0408300||zinc finger, RAN binding protein, putative	0.961479	0.983729	0.353212	0.196011	-1.21244	-0.241937	-0.196011	-0.851231	0.386579	0.485396	-0.611075	-0.695369	0.34119	0.384506	-0.34119	-0.680905	-2.17392	-1.22567	-0.549223	-1.04724	-0.045389	-0.10089	0.269885	0.014464
1	PF10_0183||PF3D7_1019000||eukaryotic translation initiation factor subunit eIF2A, putative	0.288384	0.695531	0.510387	0.771821	-1.10126	-0.288384	-0.325379	-1.06988	-0.193822	-0.11127	0.028807	0.403467	0.321387	-0.129806	-0.028807	0.030834	-1.38964	-0.983915	-0.835766	-1.8417	0.515209	-0.018536	-0.057614	-0.372633
1	PFB0125c||PF3D7_0202600||conserved Plasmodium protein, unknown function	0.177428	0.087043	0.22511	-0.033122	-1.32225	-0.47916	0.033122	-0.546902	-0.434005	0.43819	0.31587	-0.31587	-0.397994	0.369378	0.432672	-0.862425	-1.49967	-0.566203	-0.191988	-0.51378	0.036011	-0.068812	0.116802	-0.546555
1	PF11_0437||PF3D7_1142500||60S ribosomal protein L28, putative	1.80473	1.71882	1.22726	-0.010557	-1.31471	0.010557	-0.174362	-1.81628	0.374016	0.35799	-0.545324	-1.61037	0.044448	0.812045	-0.044448	-1.93595	-3.11944	-1.70826	-1.40163	-1.80572	-0.329568	0.454055	0.500876	-0.32558
1	PFI0425w||PF3D7_0908800||transporter, putative	0.541879	0.646872	0.167156	-0.116657	-1.26681	-0.348365	0.116657	-1.03851	0.370215	0.697682	-0.181506	-0.600067	0.181506	0.5724	-0.186965	-0.551578	-1.80869	-0.995237	-0.050499	-0.921857	-0.188709	-0.125282	-0.005459	0.048489
1	PF13_0130||PF3D7_1323200||vacuolar ATP synthase subunit g, putative	0.555289	1.00544	1.65996	0.361027	-1.7015	-0.361027	-0.489781	-1.3641	-0.083504	0.179008	0.083504	-0.891357	-0.248538	0.281215	0.412258	-1.32135	-2.25679	-1.36647	-2.14974	-1.72513	-0.165034	0.102207	0.328754	-0.429995
1	MAL13P1.88||PF3D7_1316900||conserved Plasmodium protein, unknown function	0.335506	0.420393	0.636251	0.161011	-1.43861	-0.161011	-0.238173	-1.44548	-0.003568	0.353563	-0.108227	-0.59072	0.024502	0.003568	0.059339	-1.18223	-1.77412	-0.581404	-0.874424	-1.60649	0.02807	-0.349995	0.167566	-0.591505
1	PFC1025w||PF3D7_0323000||conserved Plasmodium protein, unknown function	0.962446	1.04717	1.64648	0.270432	-1.45059	-0.413463	-0.270432	-1.05731	-0.066052	0.659333	0.066052	-0.869238	-0.185043	0.655572	0.562805	-0.889409	-2.41303	-1.46063	-1.91692	-1.32774	-0.118991	-0.003761	0.496753	-0.020171
1	PFA0430c||PF3D7_0108700||secreted ookinete protein, putative	0.149766	0.176457	0.625256	0.118719	-1.423	-0.640294	-0.118719	-0.720399	-0.096302	0.045993	0.626381	-0.178038	0.432441	-0.045993	0.629972	-0.393424	-1.57277	-0.816751	-0.743975	-0.839118	0.528743	-0.091986	0.003591	-0.215386
1	PFE0965c||PF3D7_0519200||vacuolar ATP synthetase	0.214445	1.22093	0.733024	0.722683	-1.16503	-0.251266	-0.214445	-0.629407	-0.238057	-0.189073	-0.093071	0.163905	-0.904582	0.285466	0.093071	0.372472	-1.37947	-1.47219	-0.947469	-1.35209	-0.666525	0.474539	0.186142	0.208567
1	PF11_0380||PF3D7_1136800||DnaJ protein, putative	0.855008	1.4747	1.21006	0.69479	-1.5031	-0.822289	-0.69479	-1.50348	0.033063	0.020986	-0.142822	-0.348547	-0.020986	0.029093	0.076601	-0.750064	-2.35811	-2.29699	-1.90485	-2.19827	-0.054049	0.008107	0.219423	-0.401517
1	PFD0885c||PF3D7_0418300||conserved Plasmodium protein, unknown function	0.373319	0.918779	0.688713	0.621536	-1.68203	-0.373319	-0.498976	-0.664551	0.002603	-0.636141	0.113978	0.384737	0.240538	-0.362672	-0.002603	-0.361471	-2.05535	-1.2921	-1.18769	-1.28609	0.237935	0.273469	-0.116581	-0.746208
1	PF13_0270||PF3D7_1351800||conserved Plasmodium protein, unknown function	0.781818	1.60929	0.000184	0.332416	-1.10756	-0.000184	-0.527613	-0.900678	0.742627	0.233404	-1.00721	-0.233404	0.633118	0.487145	-0.837521	-0.59061	-1.88938	-1.60947	-0.527797	-1.23309	-0.109509	0.253741	0.16969	-0.357206
1	PF14_0328||PF3D7_1434700||mitochondrial import inner membrane translocase subunit tim17, putative	1.01392	0.411401	0.61944	-0.256456	-1.45962	0.032993	-0.032993	-0.499857	-0.107877	0.764896	0.107877	-0.795477	-0.280536	0.872036	0.321014	-0.519064	-2.47354	-0.378408	-0.652433	-0.243401	-0.172659	0.10714	0.213137	0.276413
1	PF10_0287||PF3D7_1029400||conserved Plasmodium protein, unknown function	0.177467	0.493582	0.463973	0.523535	-1.6319	-0.710567	-0.177467	-1.39308	0.007987	0.23075	-0.060834	-0.027962	-0.150032	0.05693	0.14367	-0.007987	-1.80936	-1.20415	-0.64144	-1.91661	-0.158019	-0.17382	0.204504	0.019975
1	PFB0095c||PF3D7_0201900||erythrocyte membrane protein 3	2.26119	1.63228	-0.351235	-1.05507	-1.37451	1.98608	0.351235	-0.88505	0.930432	0.717429	-1.3234	-1.67786	1.83663	1.12408	-0.717429	-2.16298	-3.63571	0.353799	0.70247	0.17002	0.906195	0.406654	0.605975	-0.48512
1	PFA0460c||PF3D7_0109400||tubulin-specific chaperone a, putative	1.03651	0.219303	0.72978	0.452954	-1.50068	-0.949497	-0.219303	-1.35056	-0.086605	0.267727	0.137082	-0.406345	-0.090486	0.086605	0.401183	-0.48315	-2.5372	-1.1688	-0.949083	-1.80352	-0.003881	-0.181122	0.264101	-0.076805
1	PFB0830w||PF3D7_0217800||40S ribosomal protein S26e, putative	1.63449	2.12311	1.56592	-0.136816	-1.28021	0.136816	-0.539184	-2.19756	0.115536	0.586421	-0.115536	-1.73365	-0.545959	0.952363	0.248885	-1.95432	-2.9147	-1.98629	-2.10511	-2.06074	-0.661495	0.365942	0.364421	-0.22067
1	PFD0080c||PF3D7_0401800||Plasmodium exported protein (PHISTb), unknown function	1.63221	0.565897	-0.324409	0.324409	-1.49087	1.15953	-0.631483	-1.66821	-0.164604	1.9751	-0.754862	0.549857	0.009271	2.13461	-0.226183	-0.009271	-3.12308	0.593629	-0.307074	-1.99262	0.173875	0.159516	0.528679	-0.559128
1	PF14_0258||PF3D7_1428000||conserved Plasmodium membrane protein, unknown function	-0.348032	0.659801	1.82438	1.48106	-0.033562	-0.849699	-0.642595	0.033562	-0.653987	-0.609532	0.544503	0.652925	-1.09537	-0.45951	0.45951	0.976947	0.31447	-1.5095	-2.46698	-1.4475	-0.441388	0.150022	-0.084993	0.324022
1	PFD1180w||PF3D7_0424800||Plasmodium exported protein (PHISTb), unknown function	0.487616	2.4933	-0.733977	2.03838	0.202291	-0.202291	-1.03768	-1.00948	1.9785	-0.182872	-1.71266	0.266703	1.67342	-0.06071	-1.74923	0.06071	-0.285325	-2.69559	-0.303708	-3.04786	-0.305082	0.122162	-0.036565	-0.205993
1	PF10_0022||PF3D7_1001800||Plasmodium exported protein (PHISTc), unknown function	-0.125409	1.47363	0.876974	1.07969	0.018316	-0.027432	-0.018316	-1.00335	1.72392	-0.201893	-0.04821	0.409793	1.35065	0.008069	-0.008069	-0.247046	0.143725	-1.50106	-0.89529	-2.08304	-0.37328	0.209962	0.040141	-0.656839
1	PF14_0216||PF3D7_1422600||conserved Plasmodium protein, unknown function	-0.069566	0.593628	1.38885	1.0653	-0.308413	-0.744476	-0.603876	0.069566	-0.547268	-0.504042	0.657434	0.452813	-0.645039	-0.452813	0.638039	0.590386	-0.238847	-1.3381	-1.99273	-0.995737	-0.097771	0.051229	-0.019395	0.137573
1	PF11_0487||PF3D7_1147900||conserved Plasmodium protein, unknown function	0.233796	1.53507	1.5647	1.15345	-0.394997	-0.601314	-0.233796	-0.278643	0.017929	-0.097254	-0.017929	0.192467	-0.668707	0.184	-0.026635	0.399101	-0.628793	-2.13639	-1.79849	-1.43209	-0.686636	0.281254	-0.008706	0.206634
1	PFL2220w||PF3D7_1246300||conserved Plasmodium protein, unknown function	0.233414	1.55585	0.646211	1.51105	-0.233414	-0.467942	-1.00237	-0.800556	0.452065	-0.452065	-1.04942	0.49722	0.49373	-0.566494	-1.09561	0.459919	-0.466828	-2.02379	-1.64858	-2.31161	0.041665	-0.114429	-0.046188	-0.037301
1	PFE0760w||PF3D7_0515200||conserved Plasmodium protein, unknown function	-0.066697	0.311476	1.60854	1.1374	-0.68394	-1.30502	-0.102693	0.066697	-0.785242	-0.568905	1.07511	0.294928	-0.721106	-0.294928	0.930743	0.346389	-0.617243	-1.6165	-1.71124	-1.0707	0.064136	0.273977	-0.144365	0.051461
1	PF13_0197||PF3D7_1335100||merozoite surface protein 7 precursor	-1.19297	3.8583	3.68655	4.36103	-0.506219	-1.09842	-1.36494	0.506219	-0.305009	-1.34593	0.003159	1.85618	-0.003159	-1.35117	0.235586	1.08427	0.686753	-4.95672	-5.05148	-3.85481	0.30185	-0.005247	0.232427	-0.771903
1	MAL8P1.143-a||PF3D7_0803600||conserved Plasmodium protein, unknown function	0.062889	0.659315	1.31084	1.28518	-0.489698	-0.244563	-0.062889	-0.377069	-0.454537	-0.339877	0.297075	0.69211	-0.146599	-0.434496	0.146599	0.298071	-0.552587	-0.903878	-1.37373	-1.66225	0.307938	-0.094619	-0.150476	-0.394039
1	PF10_0311||PF3D7_1031700||protein phosphatase inhibitor, putative	-0.122621	0.884047	1.61126	1.22872	-0.558508	-0.664204	0.122621	-0.225254	-0.515654	-0.151226	0.151226	0.464639	-0.756075	-0.283251	0.346708	0.479217	-0.435887	-1.54825	-1.48864	-1.45397	-0.240421	-0.132025	0.195482	0.014578
1	PF08_0093||PF3D7_0811100||mitochondrial carrier protein, putative	-0.12721	0.58794	1.81543	0.967988	-0.620823	-0.613	-0.19822	0.12721	-0.699356	-0.175454	1.05272	0.152612	-1.14159	-0.152612	0.885487	0.223328	-0.493613	-1.20094	-2.01365	-0.840778	-0.442229	0.022842	-0.167236	0.070716
1	PF08_0047||PF3D7_0820300||conserved Plasmodium protein, unknown function	0.618243	1.71606	0.847069	1.37566	-0.720392	-0.618243	-1.29877	-1.08607	0.62599	0.021454	-0.614138	0.168396	0.816999	-0.021454	-0.552029	-0.1384	-1.33864	-2.3343	-2.14584	-2.46173	0.191009	-0.042908	0.062109	-0.306796
1	PF08_0134||PF3D7_0801600||conserved Plasmodium protein, unknown function	-0.091654	0.091654	1.32559	0.758857	-0.920866	-1.28826	-0.37701	0.097663	-0.164789	-0.0132	0.663898	-0.11152	-0.997149	0.0132	0.679406	0.482176	-0.829212	-1.37991	-1.7026	-0.661194	-0.83236	0.0264	0.015508	0.593696
1	PF11_0484||PF3D7_1147600||conserved Plasmodium protein, unknown function	0.041448	0.522274	1.26125	0.787991	-0.700543	-1.06931	-0.105142	-0.041448	-0.266921	-0.189155	0.777515	0.189155	-0.471382	-0.229048	0.64942	0.191532	-0.741991	-1.59158	-1.3664	-0.829439	-0.204461	-0.039893	-0.128095	0.002377
1	PF13_0258||PF3D7_1349300||serine/threonine protein kinase	0.152779	1.06447	1.40098	1.37513	-0.765612	-0.776775	-0.508479	-0.152779	-0.377301	-0.295341	0.444089	0.461954	-0.278422	-0.36402	0.417487	0.278422	-0.918391	-1.84124	-1.90945	-1.52791	0.098879	-0.068679	-0.026602	-0.183532
1	PF10_0031||PF3D7_1002700||conserved Plasmodium protein, unknown function	0.11914	0.76792	1.40859	0.804455	-0.692076	-0.569841	-0.11914	-0.21175	-0.068668	-0.069346	0.268303	0.068668	0.100961	-0.406687	0.345214	-0.474706	-0.811216	-1.33776	-1.52773	-1.01621	0.169629	-0.337341	0.076911	-0.543374
1	PFI0300w||PF3D7_0906100||developmental protein, putative	-0.022373	0.407058	1.76736	0.757769	-0.626928	-1.15719	-0.53356	0.022373	-0.372238	-0.16869	1.11087	0.152667	-0.515043	-0.152667	1.44298	0.252613	-0.604555	-1.56425	-2.30092	-0.735396	-0.142805	0.016023	0.332113	0.099946
1	MAL8P1.121||PF3D7_0808400||coatomer epsilon subunit, putative	0.065834	0.966629	1.1348	0.712778	-0.677353	-0.256389	-0.065834	-0.652025	0.089585	-0.052775	-0.101853	0.042446	-0.042446	0.054511	0.178472	-0.231642	-0.743187	-1.22302	-1.20064	-1.3648	-0.132031	0.107286	0.280325	-0.274088
1	PF13_0303||PF3D7_1356600||regulator of chromosome condensation, putative	0.535969	1.31191	0.985536	1.20538	-0.84595	-0.618517	-0.928785	-0.535969	0.032514	-0.075631	-0.359703	0.31737	-0.032514	0.229423	-0.218141	0.226946	-1.38192	-1.93043	-1.91432	-1.74135	-0.065028	0.305054	0.141562	-0.090424
1	PF14_0304||PF3D7_1432300||conserved Plasmodium protein, unknown function	0.004395	1.13088	1.33378	1.67466	-0.618198	-0.351529	-0.004395	-0.237251	-0.363176	-0.18848	0.426612	0.857589	-0.353634	-0.200404	0.18848	0.757417	-0.622593	-1.48241	-1.33818	-1.91191	0.009542	-0.011924	-0.238132	-0.100172
1	PF13_0229||PF3D7_1342100||aconitase	0.110383	0.899604	1.28533	1.67319	-0.880199	-0.566132	-0.902492	-0.110383	-0.662641	-0.595747	0.378041	1.28003	-0.475392	-0.260626	0.260626	0.877466	-0.990582	-1.46574	-2.18782	-1.78358	0.187249	0.335121	-0.117415	-0.402563
1	MAL13P1.117||PF3D7_1321400||DHHC-type zinc finger protein, putative	0.288732	1.87719	0.931794	1.69415	-0.595529	-0.705149	-0.805957	-0.288732	0.431733	-0.159067	-0.152112	1.72028	-0.095398	0.080321	-0.080321	1.69968	-0.884261	-2.58234	-1.73775	-1.98288	-0.527131	0.239388	0.071791	-0.0206
1	MAL7P1.84||PF3D7_0717200||conserved Plasmodium protein, unknown function	0.004644	0.958106	1.20822	1.71416	-1.05515	-0.547864	-0.004644	-0.740387	-0.033582	-0.332168	0.032246	1.04265	0.107112	-0.42137	-0.032246	0.287195	-1.0598	-1.50597	-1.21286	-2.45454	0.140694	-0.089202	-0.064492	-0.755452
1	PFC0170c||PF3D7_0303700||dihydrolipoamide acyltransferase, putative	0.41974	0.396395	1.01001	0.829442	-1.012	-0.835458	-0.396395	-0.440395	-0.652282	-0.011194	0.698221	0.158867	-0.593457	-0.037483	0.679845	0.011194	-1.43174	-1.23185	-1.40641	-1.26984	0.058825	-0.026289	-0.018376	-0.147673
1	PF10_0132||PF3D7_1013500||phosphoinositide specific phospholipase c, putative	0.132664	0.854171	0.801285	0.85434	-0.936364	-0.527191	-0.132664	-0.438423	-0.143192	-0.1433	0.130842	0.573177	-0.130842	-0.146762	0.149868	0.355882	-1.06903	-1.38136	-0.933949	-1.29276	0.01235	-0.003462	0.019026	-0.217295
1	PF14_0488||PF3D7_1451300||conserved Plasmodium protein, unknown function	0.121036	0.643282	1.68939	1.44146	-0.926475	-0.835252	-0.121036	-0.373294	-0.661214	-0.028926	0.40083	0.205123	-0.653073	-0.18327	0.672476	0.028926	-1.04751	-1.47853	-1.81042	-1.81476	0.008141	-0.154344	0.271646	-0.176197
1	PF07_0109||PF3D7_0726700||conserved Plasmodium protein, unknown function	0.307689	0.526008	1.43058	0.925849	-1.11584	-0.720737	-0.771452	-0.307689	-0.412298	0.108263	0.482366	-0.106351	-0.737206	0.106351	0.600823	-0.392047	-1.42353	-1.24674	-2.20203	-1.23354	-0.324908	-0.001912	0.118457	-0.285696
1	PF14_0615||PF3D7_1464700||ATP synthase (C/AC39) subunit, putative	0.616074	1.94869	1.21845	1.5871	-1.10952	-0.616074	-0.959443	-0.942606	-0.079024	0.013711	-0.189671	0.87733	-0.298213	0.193322	-0.013711	0.61895	-1.72559	-2.56476	-2.17789	-2.52971	-0.219189	0.179611	0.17596	-0.25838
1	PFF0140c||PF3D7_0602900||conserved Plasmodium protein, unknown function	0.341518	1.7182	1.82912	1.98406	-0.500707	-0.922277	-0.852127	-0.341518	0.157515	-0.324422	-0.246945	0.296328	0.152578	-0.152578	-0.269289	0.392354	-0.842225	-2.64048	-2.68125	-2.32558	-0.004937	0.171844	-0.022344	0.096026
1	PFL0465c||PF3D7_1209300||zinc finger transcription factor (krox1)	0.258699	0.322522	0.896611	1.2459	-1.34407	-0.824855	-0.388438	-0.258699	-0.845845	-0.234418	0.055555	0.615809	-0.007031	-0.570941	0.263155	0.007031	-1.60277	-1.14738	-1.28505	-1.5046	0.838814	-0.336523	0.2076	-0.608778
1	PF11_0164||PF3D7_1115600||peptidyl-prolyl cis-trans isomerase,cyclophilin	0.167142	1.19993	2.21223	1.39627	-0.680932	-0.663361	-0.436724	-0.167142	-0.863838	-0.179934	1.32756	0.139273	-1.16156	0.094668	0.997417	-0.094668	-0.848074	-1.86329	-2.64896	-1.56341	-0.297723	0.274602	-0.330146	-0.233941
1	PFB0687c||PF3D7_0215100||RING zinc finger protein, putative	0.40479	1.41604	1.38136	1.48793	-1.01317	-0.569497	-0.630004	-0.40479	-0.64263	-0.373067	0.133969	0.767663	-0.836242	-0.133969	0.295574	0.578029	-1.41796	-1.98554	-2.01137	-1.89272	-0.193612	0.239098	0.161605	-0.189634
1	PFL1415w||PF3D7_1229300||conserved Plasmodium protein, unknown function	0.440504	1.35751	1.14349	1.6122	-1.4144	-0.440504	-0.975731	-0.786914	-0.576697	-0.07252	0.229536	0.639518	-0.102301	-0.042677	0.042677	0.427109	-1.8549	-1.79801	-2.11922	-2.39911	0.474396	0.029843	-0.186859	-0.212409
1	PFL1755w||PF3D7_1236300||conserved Plasmodium protein, unknown function	-0.094288	1.0811	1.39425	0.952695	-1.13786	-0.838859	0.094288	-0.669131	-0.249406	-0.344071	0.725283	0.820637	-0.236767	-0.149909	0.738503	0.149909	-1.04358	-1.91996	-1.29996	-1.62183	0.012639	0.194162	0.01322	-0.670728
1	PFD0930w||PF3D7_0419200||CGI-141 protein homolog, putative	-0.017847	1.19968	1.34188	1.75088	-0.844159	-0.684524	-0.185659	0.017847	-0.354698	-0.067435	0.305937	0.762759	-0.606845	-0.252003	0.067435	0.843034	-0.826312	-1.8842	-1.52754	-1.73303	-0.252147	-0.184568	-0.238502	0.080275
1	MAL8P1.52||PF3D7_0821400||conserved Plasmodium protein, unknown function	0.698932	3.17871	2.52044	3.39374	-0.764012	-0.698932	-0.926063	-1.14424	0.288046	-1.27442	-0.584735	1.16111	0.477324	-1.09546	-0.288046	0.657949	-1.46294	-3.87765	-3.4465	-4.53798	0.189278	0.178967	0.296689	-0.503159
1	PF14_0069||PF3D7_1407200||conserved Plasmodium protein, unknown function	0.311147	1.36533	0.391151	1.15978	-1.25577	-0.740849	-0.311147	-0.971806	0.204391	-0.204391	-0.784306	1.10394	0.573707	-0.226845	-0.345695	0.277752	-1.56691	-2.10618	-0.702298	-2.13158	0.369316	-0.022454	0.438611	-0.826188
1	PFF0840w||PF3D7_0617300||conserved Plasmodium protein, unknown function	-0.327825	1.71322	2.41537	2.58614	-0.590494	-0.439432	-0.970449	0.327825	-0.163922	-0.766527	0.163922	0.853477	-0.68466	-0.492288	0.233992	0.740539	-0.262669	-2.15266	-3.38582	-2.25831	-0.520738	0.274239	0.07007	-0.112938
1	PF11_0190||PF3D7_1118400||haloacid dehalogenase-like hydrolase, putative	0.000131	1.56856	2.04483	2.24029	-0.827592	-0.352928	-0.314755	-0.000131	-0.712984	-0.325891	0.325891	1.22014	-0.922622	-0.401822	0.422321	1.0447	-0.827723	-1.92148	-2.35958	-2.24042	-0.209638	-0.075931	0.09643	-0.175437
1	PF13_0119||PF3D7_1320600||Rab GTPase 11a	0.472664	1.33015	0.798052	1.56298	-0.965495	-0.548516	-0.472664	-0.677374	0.20967	0.007729	-0.335746	0.582787	0.024329	-0.103957	-0.385389	-0.007729	-1.43816	-1.87866	-1.27072	-2.24035	-0.185341	-0.111686	-0.049643	-0.590516
1	PF11_0332||PF3D7_1132300||nucleic acid binding protein, putative	0.08897	0.388601	1.50169	0.536177	-1.33615	-1.02	-0.08897	-1.0342	-0.773613	0.305053	0.947383	0.044308	-0.597307	-0.044308	1.34145	-0.059279	-1.42512	-1.4086	-1.59066	-1.57038	0.176306	-0.349361	0.394064	-0.103587
1	PF10_0154||PF3D7_1015800||ribonucleotide reductase small subunit, putative	-0.019418	0.826252	2.03797	1.33507	-1.50297	-1.61976	0.019418	-0.452186	-0.463673	-0.220365	1.07118	0.560632	-0.901954	-0.223765	1.5028	0.220365	-1.48356	-2.44601	-2.01855	-1.78726	-0.438281	-0.0034	0.431626	-0.340267
1	PF10_0082||PF3D7_1008500||conserved Plasmodium membrane protein, unknown function	0.107091	1.08868	1.40354	1.46609	-1.05988	-0.584821	-0.107091	-0.23727	-0.194324	-0.199167	0.47351	0.63931	-0.271137	-0.212146	0.194324	0.556233	-1.16697	-1.6735	-1.51063	-1.70336	-0.076813	-0.012979	-0.279186	-0.083077
1	PFE1510c||PF3D7_0530200||triose phosphate transporter	0.066825	0.82199	1.94144	1.21673	-1.31302	-1.6148	-0.066825	-0.420288	-0.87431	-0.533318	1.1809	0.250996	-1.13883	-0.250996	1.08346	0.323514	-1.37985	-2.43679	-2.00827	-1.63702	-0.264522	0.282322	-0.097437	0.072518
1	PF14_0355||PF3D7_1437500||conserved Plasmodium membrane protein, unknown function	0.222762	1.66192	2.07256	1.62558	-1.22849	-1.56894	-0.436339	-0.222762	-0.380214	-0.247885	0.394783	0.036208	-0.659338	-0.036208	0.439349	0.376316	-1.45125	-3.23085	-2.50889	-1.84834	-0.279124	0.211677	0.044566	0.340108
1	MAL13P1.343||PF3D7_1368100||proteasome regulatory subunit, putative	0.299754	0.848804	1.27846	0.868075	-1.26134	-0.838362	-0.299754	-0.600322	-0.594364	-0.058753	0.370045	0.062958	-0.754613	0.058753	0.471973	-0.085344	-1.5611	-1.68717	-1.57822	-1.4684	-0.160249	0.117506	0.101928	-0.148302
1	PF08TR004||PF3D7_0829800||product unspecified	0.33539	2.0289	1.14264	1.86328	-1.06453	-1.37762	-0.33539	-0.76034	0.027101	-0.089129	0.368744	0.273253	-0.093155	0.429959	-0.027101	-0.256062	-1.39992	-3.40652	-1.47803	-2.62362	-0.120256	0.519088	-0.395845	-0.529315
1	PFL1300c||PF3D7_1226900||conserved Plasmodium protein, unknown function	0.743562	0.582696	1.46924	0.725042	-1.63095	-1.01728	-0.582696	-0.762123	-0.746393	0.021469	0.723503	-0.154953	-0.85528	0.280149	0.759847	-0.021469	-2.37451	-1.59998	-2.05194	-1.48717	-0.108887	0.25868	0.036344	0.133484
1	PFE1170w||PF3D7_0523400||DnaJ protein, putative	0.554393	1.55154	1.22428	1.68819	-1.63313	-0.859945	-0.554393	-0.853373	-0.048494	-0.20267	0.030229	0.48047	-0.030229	-0.058224	0.267862	0.059817	-2.18753	-2.41149	-1.77867	-2.54156	0.018265	0.144446	0.237633	-0.420653
1	PFL1720w||PF3D7_1235600||serine hydroxymethyltransferase	0.010517	1.58887	2.62997	1.98134	-0.968589	-1.29677	-0.010517	-0.187693	-0.703618	-0.438476	1.38739	0.514975	-1.18616	-0.520239	1.1555	0.438476	-0.979106	-2.88564	-2.64049	-2.16903	-0.482543	-0.081763	-0.231893	-0.076499
1	PFE0650c||PF3D7_0513100||conserved Plasmodium protein, unknown function	-0.109982	1.61769	2.39924	1.98805	-1.15837	-1.00936	-0.964179	0.109982	-1.04769	-0.579097	0.615071	0.993506	-1.18831	-0.444924	0.444924	1.22384	-1.04838	-2.62705	-3.36342	-1.87806	-0.140618	0.134173	-0.170147	0.230333
1	PFI0725c||PF3D7_0914800||GINS complex subunit Psf3, putative	0.200519	1.03307	1.79734	1.55958	-1.47419	-1.22501	-0.200519	-0.336778	-1.1094	-0.841853	0.557065	0.639323	-0.903267	-0.54508	0.54508	0.737196	-1.67471	-2.25808	-1.99786	-1.89636	0.206134	0.296773	-0.011985	0.097873
1	MAL13P1.81||PF3D7_1315500||conserved Plasmodium protein, unknown function	0.558721	1.55495	1.12041	1.58324	-1.30635	-0.558721	-0.818348	-0.741424	-0.322052	0.037708	-0.412801	0.444508	-0.67576	0.070842	-0.037708	0.58584	-1.86507	-2.11367	-1.93875	-2.32466	-0.353708	0.033134	0.375093	0.141332
1	PFD0665c||PF3D7_0413600||26S proteasome AAA-ATPase subunit RPT3, putative	0.625842	1.48531	1.96129	1.61549	-1.09237	-0.870871	-0.625842	-0.702307	-0.496274	-0.205705	0.622266	0.335295	-0.620209	-0.174459	0.536501	0.174459	-1.71821	-2.35618	-2.58714	-2.3178	-0.123935	0.031246	-0.085765	-0.160836
1	PF10_0271||PF3D7_1027700||centrin-3	0.255373	0.693691	2.43402	1.46456	-1.55607	-1.32884	-0.255373	-0.278563	-0.801632	-0.210756	1.56911	0.363764	-0.904788	-0.179182	1.64123	0.179182	-1.81144	-2.02253	-2.6894	-1.74313	-0.103156	0.031574	0.07212	-0.184582
1	MAL7P1.93||PF3D7_0718400||mitochondrial ribosomal protein S8 precursor, putative	0.174072	0.909659	1.10116	0.926464	-1.8529	-1.18384	-0.174072	-1.1644	-1.29506	-0.064436	-0.056183	0.253722	-1.19558	0.056183	0.216811	0.176246	-2.02697	-2.0935	-1.27523	-2.09086	0.099477	0.120619	0.272994	-0.077476
1	PFC10_API0040||PFC10_API0040||product unspecified	-0.088749	0.367926	1.89796	1.25995	-1.78997	-1.08747	0.052372	-0.052372	-1.3128	-0.083144	0.735327	0.320212	-1.07533	-0.313176	0.649504	0.083144	-1.70122	-1.45539	-1.84558	-1.31233	0.237467	-0.230032	-0.085823	-0.237068
1	PFI0230c||PF3D7_0904700||bacterial histone-like protein	0.119219	1.45913	2.89986	2.01298	-1.3262	-1.29134	-0.156814	-0.119219	-0.533967	-0.152781	1.33683	0.26983	-0.972193	-0.072809	1.492	0.072809	-1.44541	-2.75047	-3.05668	-2.1322	-0.438226	0.079972	0.155173	-0.197021
1	PF14_0676||PF3D7_1470900||20S proteasome beta 4 subunit, putative	0.324132	0.918979	1.70758	0.868171	-1.9698	-1.22691	-0.324132	-0.876005	-0.699802	0.174875	1.13452	-0.198753	-1.1368	0.278647	1.20538	-0.174875	-2.29393	-2.14589	-2.03171	-1.74418	-0.437002	0.103772	0.07086	0.023878
1	PF08_0091||PF3D7_0811600||conserved Plasmodium protein, unknown function	0.538177	2.50897	2.24501	2.74679	-1.62989	-1.4507	-0.817168	-0.538177	-0.596317	-0.493301	0.426834	0.886513	-0.779818	-0.16935	0.16935	0.786086	-2.16807	-3.95967	-3.06218	-3.28496	-0.183501	0.323951	-0.257484	-0.100427
1	PF14_0545||PF3D7_1457200||thioredoxin, putative	0.361595	1.49269	2.89485	1.6951	-2.52324	-1.88794	-0.361595	-1.24146	-1.01377	-0.114649	1.18364	0.071704	-1.67168	0.020123	1.54013	-0.020123	-2.88483	-3.38063	-3.25645	-2.93656	-0.657903	0.134772	0.356491	-0.091827
1	PFA0670c||PF3D7_0113900||Plasmodium exported protein (hyp8), unknown function	0.391454	1.27802	-0.904983	-0.241826	0.652481	0.241826	-1.28663	-0.483594	2.10728	0.134189	-1.17253	-0.311753	1.48147	0.955556	-1.21308	-0.134189	0.261027	-1.03619	-0.381646	-0.241768	-0.625812	0.821367	-0.040551	0.177564
1	PFB0932w||PF3D7_0220700||Plasmodium exported protein (hyp9), unknown function	0.587024	1.87598	-0.484423	0.322564	0.186004	-0.186004	-0.678779	-1.15685	1.29974	0.348168	-1.30208	-0.417793	0.885394	0.531148	-1.18491	-0.348168	-0.40102	-2.06198	-0.194356	-1.47942	-0.414346	0.18298	0.117172	0.069625
1	PF10_0269||PF3D7_1027400||DNA-directed RNA polymerase II, putative	0.565443	1.16664	0.282851	-0.432552	-0.094881	0.094881	-0.214323	-0.659922	0.492333	0.446975	-0.240066	-1.05877	0.061238	0.572928	-0.061238	-0.808908	-0.660324	-1.07176	-0.497174	-0.22737	-0.431095	0.125953	0.178828	0.249863
1	MAL13P1.153||PF3D7_1327200||ribonuclease P protein subunit rpr, putative	0.823269	0.496957	0.149462	-0.385302	-0.326271	-0.149462	0.252686	-0.597021	0.450481	0.289914	-0.561427	-1.30695	0.603328	0.088606	-0.088606	-1.18392	-1.14954	-0.646419	0.103224	-0.211719	0.152847	-0.201308	0.472821	0.123028
1	PFI1035w||PF3D7_0921100||conserved Plasmodium protein, unknown function	1.08772	0.088417	0.182055	-0.704479	-0.411787	-0.192663	0.46382	-0.088417	0.127012	1.15062	-0.127012	-0.586108	-0.159478	1.25415	0.665181	-0.520405	-1.49951	-0.28108	0.281765	0.616062	-0.28649	0.103527	0.792193	0.065703
1	PFL2125c||PF3D7_1244200||transcription factor Tfb2, putative	1.22212	0.769143	0.332024	-0.049579	-0.140383	0.049579	-0.210902	-0.29314	0.28566	0.237281	-0.199823	-1.29841	0.199823	0.349283	-0.209354	-1.37368	-1.3625	-0.719564	-0.542926	-0.243561	-0.085837	0.112002	-0.009531	-0.075277
1	PF14_0150||PF3D7_1415200||DNA-directed RNA polymerase I/III subunit, putative	0.693527	1.41208	0.031803	0.32242	-0.042364	-0.031803	-0.044159	-0.335755	0.728944	0.763202	-1.00902	-0.645137	0.44462	0.875027	-0.702094	-0.44462	-0.735891	-1.44389	-0.075962	-0.658175	-0.284324	0.111825	0.306926	0.200517
1	PF14_0307||PF3D7_1432500||conserved protein, unknown function	0.857437	0.978392	-0.090949	-0.373365	-0.377482	0.090949	0.616838	-0.22482	0.743785	0.672374	-0.727535	-0.756515	0.491834	0.447995	-0.447995	-0.775202	-1.23492	-0.887443	0.707787	0.148545	-0.251951	-0.224379	0.27954	-0.018687
1	MAL7P1.27||PF3D7_0709000||chloroquine resistance transporter	1.25038	1.70838	-0.034089	0.034089	-0.062154	0.271985	-0.284863	-1.28314	1.03416	0.438118	-0.644024	-0.438118	0.550337	0.972447	-0.628159	-0.443275	-1.31253	-1.4364	-0.250774	-1.31723	-0.483823	0.534329	0.015865	-0.005157
1	PFE0335w||PF3D7_0506800||conserved Plasmodium protein, unknown function	0.653737	0.777021	0.488519	0.157557	-0.301415	-0.157557	-0.312595	-0.45819	0.145326	0.150688	0.04697	-0.508543	-0.010037	0.010037	-0.225874	-0.475297	-0.955152	-0.934578	-0.801114	-0.615747	-0.155363	-0.140651	-0.272844	0.033246
1	PF10_0210||PF3D7_1021600||deoxyribose-phosphate aldolase, putative	0.625569	0.448083	0.356015	-0.143446	-0.366115	-0.595116	0.143446	-0.832004	0.214385	-0.015671	0.015671	-0.834738	-0.079175	0.130627	0.249994	-0.685293	-0.991684	-1.0432	-0.212569	-0.688558	-0.29356	0.146298	0.234323	0.149445
1	PFC0065c||PF3D7_0301300||alpha/beta hydrolase, putative	1.19428	1.50273	-0.222605	0.365555	-0.287095	0.162485	-0.539894	-0.162485	-0.014496	0.447612	-1.24193	0.233701	-0.13306	0.440129	-0.925203	0.014496	-1.48138	-1.34025	-0.317289	-0.52804	-0.118564	-0.007483	0.316725	-0.219205
1	PFF0685c||PF3D7_0614200||conserved Plasmodium protein, unknown function	0.600666	0.594883	0.141953	-0.029544	-0.433038	-0.450555	0.029544	-0.613333	0.25385	0.503108	-0.416538	-0.619001	0.065095	0.396214	-0.065095	-0.414559	-1.0337	-1.04544	-0.112409	-0.583789	-0.188755	-0.106894	0.351443	0.204442
1	PF11_0247||PF3D7_1123600||RAP protein, putative	0.734258	0.734358	0.456677	0.218198	-0.246029	-0.626106	-0.218198	-0.430329	-0.006126	0.313697	0.060473	-0.413577	-0.322803	0.10383	0.006126	-0.514741	-0.980287	-1.36046	-0.674875	-0.648527	-0.316677	-0.209867	-0.054347	-0.101164
1	PFI0860c||PF3D7_0917600||ATP-dependent RNA helicase, putative	1.12478	1.48979	0.386359	-0.153272	-0.110456	-0.015246	0.015246	-0.144263	0.519109	0.128604	-0.211156	-1.08886	0.221015	0.296553	-0.128604	-1.11633	-1.23524	-1.50504	-0.371113	0.009009	-0.298094	0.167949	0.082552	-0.027462
1	MAL8P1.36||PF3D7_0823700||conserved Plasmodium protein, unknown function	1.21115	1.27594	0.924686	-0.328623	-0.275243	0.085189	-0.085189	-0.365697	0.162237	0.812744	-0.098102	-1.08207	-0.34999	1.14195	0.098102	-0.949194	-1.4864	-1.19075	-1.00988	-0.037074	-0.512227	0.329206	0.196204	0.132878
1	MAL13P1.338||PF3D7_1367100||U1 small nuclear ribonucleoprotein, putative	0.963654	0.739047	0.938289	0.126286	-0.272981	-0.126286	-0.548065	-0.241142	0.098103	-0.002491	0.002491	-1.00494	0.05239	-0.008119	0.094214	-1.1091	-1.23663	-0.865333	-1.48635	-0.367428	-0.045713	-0.005628	0.091723	-0.104166
1	MAL13P1.272||PF3D7_1354600||60S ribosomal protein L7-2, putative	1.59794	1.35477	0.371954	0.08505	-0.173277	-0.08505	-0.503726	-0.647907	0.818426	0.485173	-0.968138	-1.18137	0.626301	0.66195	-0.485173	-1.68922	-1.77122	-1.43982	-0.87568	-0.732957	-0.192125	0.176777	0.482965	-0.507845
1	PFF1270c||PF3D7_0626200||conserved Plasmodium protein, unknown function	0.928321	1.31424	0.778873	-0.014855	-0.289399	-0.137434	0.014855	-0.207868	0.543097	0.559439	-0.458151	-0.999793	0.052229	0.433966	-0.052229	-0.958767	-1.21772	-1.45168	-0.764018	-0.193013	-0.490868	-0.125473	0.405922	0.041026
1	PFI0480w||PF3D7_0909900||helicase with Zn-finger motif, putative	0.402247	0.489623	0.100136	-0.100136	-0.704934	-0.298628	0.315924	-0.874124	0.133146	-0.041586	-0.121207	-0.578829	0.041586	0.238009	0.087946	-0.564375	-1.10718	-0.788251	0.215788	-0.773988	-0.09156	0.279595	0.209153	0.014454
1	PFI1760w||PF3D7_0936400||ring-exported protein 4	1.31427	2.34763	-0.236308	0.380344	-0.469727	0.236308	-0.416069	-0.801198	1.64382	0.53224	-1.57013	-0.53224	1.35688	0.746422	-1.39245	-0.768473	-1.78399	-2.11132	-0.179761	-1.18154	-0.286936	0.214182	0.177684	-0.236233
1	PFI0105c||PF3D7_0902200||serine/threonine protein kinase, FIKK family	1.63882	1.68498	0.156081	-0.095112	-0.631853	0.095112	-0.479026	-0.952456	0.458694	0.810145	-0.774499	-1.31084	0.358154	1.02287	-0.358154	-1.17566	-2.27067	-1.58987	-0.635107	-0.857344	-0.10054	0.212722	0.416345	0.135174
1	PFA0330w||PF3D7_0106700||small ribosomal subunit assembling AARP2 protein	1.30559	0.867175	-0.022144	0.022144	-0.736166	0.037064	-0.156103	-0.508469	0.347291	0.444573	-0.383248	-0.510445	0.430455	0.43278	-0.347291	-0.601464	-2.04175	-0.830111	-0.133959	-0.530613	0.083164	-0.011793	0.035957	-0.091019
1	PFD0455w||PF3D7_0409200||40S ribosomal processing protein, putative	0.41981	0.594181	-0.091919	0.091919	-1.09181	-0.198147	0.176944	-1.04385	0.345542	0.423781	-0.222588	-0.086238	0.043379	0.266359	-0.043379	-0.223167	-1.51162	-0.792328	0.268863	-1.13577	-0.302163	-0.157422	0.179209	-0.136929
1	PFF0165c||PF3D7_0603400||conserved Plasmodium protein, unknown function	0.932916	0.683411	0.424195	0.134817	-0.883946	-0.30846	-0.134817	-0.550144	0.004196	0.251702	-0.055481	-0.887296	0.219286	-0.004196	0.009876	-1.19762	-1.81686	-0.991871	-0.559012	-0.684961	0.21509	-0.255898	0.065357	-0.310328
1	PF11_0272||PF3D7_1126200||40S ribosomal protein S18, putative	0.91989	1.56985	0.44453	-0.722167	-1.29145	0.079261	-0.079261	-2.36287	0.118919	0.680804	-0.118919	-1.45006	-0.211463	0.884951	0.435737	-1.70204	-2.21134	-1.49059	-0.523791	-1.64071	-0.330382	0.204147	0.554656	-0.251984
1	PF11_0258||PF3D7_1124700||co-chaperone GrpE, putative	1.5048	0.556248	0.677002	-0.347069	-1.23497	-0.150375	0.150375	-0.896323	0.052763	1.13474	-0.052763	-1.16713	-0.085988	1.05925	0.384629	-1.05326	-2.73977	-0.706623	-0.526627	-0.549254	-0.138751	-0.075487	0.437392	0.113877
1	PF14_0269||PF3D7_1429000||conserved protein, unknown function	0.223399	0.14584	0.645819	-0.358613	0.278991	-0.14584	-0.866998	-0.16654	-0.075389	0.52032	0.075389	-0.650174	-0.285437	0.391338	0.352072	-0.624549	0.055592	-0.29168	-1.51282	0.192073	-0.210048	-0.128982	0.276683	0.025625
1	PF11_0055||PF3D7_1104400||conserved protein, unknown function	0.161756	-0.161756	0.504012	-0.472724	0.181127	-0.21834	-0.766417	0.33325	0.095897	-0.095897	0.561118	-0.798716	-0.285001	0.271988	0.679098	-1.00002	0.019371	-0.056584	-1.27043	0.805974	-0.380898	0.367885	0.11798	-0.201309
2	PF14_0504||PF3D7_1453000||conserved Plasmodium protein, unknown function	0.198159	0.3194	0.336239	-0.353064	-0.027867	-0.625471	-0.534798	0.027867	-0.008841	0.004221	0.004647	-0.988419	0.100725	-0.004221	0.107411	-1.0123	-0.226026	-0.944871	-0.871037	0.380931	0.109566	-0.008442	0.102764	-0.02388
2	PF13_0064||PF3D7_1311600||conserved Plasmodium protein, unknown function	-0.211573	0.503468	0.175218	0.622257	-0.194161	-0.175218	0.227049	-0.726008	0.144211	-0.064298	-0.482926	0.429117	0.053644	-0.053644	-0.408774	0.381752	0.017412	-0.678686	0.051831	-1.34827	-0.090567	0.010654	0.074152	-0.047365
2	PF14_0084||PF3D7_1408700||conserved Plasmodium protein, unknown function	-0.089908	0.389071	0.367623	0.18868	-0.415431	-0.082736	0.082736	-0.792616	0.117297	0.026093	0.288102	-0.193079	0.304962	-0.026093	-0.07197	-0.403118	-0.325523	-0.471807	-0.284887	-0.981296	0.187665	-0.052186	-0.360072	-0.210039
2	MAL13P1.540||PF3D7_1344200||heat shock protein 70, putative	0.186505	0.014687	0.336855	-0.014687	-0.354984	-0.100841	0.081583	-0.601127	0.01462	-0.069718	0.423023	-0.542135	0.158749	-0.01462	0.308632	-0.896629	-0.541489	-0.115528	-0.255272	-0.58644	0.144129	0.055098	-0.114391	-0.354494
2	PFE0280c||PF3D7_0505700||conserved Plasmodium membrane protein, unknown function	0.391473	0.043969	1.19712	0.228983	-0.428569	-0.043969	-0.056615	-0.188024	-0.146165	0.144698	0.305901	-0.681492	0.66743	-0.144698	0.568802	-1.27037	-0.820042	-0.087938	-1.25374	-0.417007	0.813595	-0.289396	0.262901	-0.588875
2	PFI0350c||PF3D7_0907300||conserved Plasmodium protein, unknown function	0.314697	-0.009276	0.469335	-0.06889	-0.298744	-0.277971	0.910164	0.009276	-0.021658	0.272801	-0.03731	-1.17155	0.232202	0.021658	0.075175	-1.33407	-0.613441	-0.268695	0.440829	0.078166	0.25386	-0.251143	0.112485	-0.162523
2	PF10_0232||PF3D7_1023900||chromodomain-helicase-DNA-binding protein 1 homolog, putative	0.138836	0.519276	0.385147	0.837296	-0.861347	-0.138836	-0.272257	-0.328323	-0.204428	-0.391311	0.337446	0.537412	0.134958	-0.289206	0.050785	-0.050785	-1.00018	-0.658112	-0.657404	-1.16562	0.339386	0.102105	-0.286661	-0.588197
2	PFF0920c-a||PF3D7_0619000||conserved Plasmodium protein, unknown function	0.223108	0.082629	0.282338	-0.074549	-0.819729	-0.339358	0.074549	-0.346633	-0.128305	0.227328	0.288152	-0.535854	-0.162958	0.128305	0.385901	-0.647598	-1.04284	-0.421987	-0.207789	-0.272084	-0.034653	-0.099023	0.097749	-0.111744
2	PF14_0178||PF3D7_1418000||ubiquitin fusion degradation protein UFD1, putative	0.25977	0.10066	0.461969	-0.10066	-0.666163	-0.472839	0.392204	-0.346815	0.041557	0.214827	-0.041557	-0.37542	-0.214023	0.095792	0.05011	-0.454533	-0.925933	-0.573499	-0.069765	-0.246155	-0.25558	-0.119035	0.091667	-0.079113
2	PF14_0259||PF3D7_1428100||conserved Plasmodium protein, unknown function	-0.094487	0.46221	0.094487	0.61524	-1.01104	-0.344753	0.4171	-0.689543	-0.023316	0.095822	-0.584951	0.705435	0.023316	-0.065593	-0.330804	0.260468	-0.916553	-0.806963	0.322613	-1.30478	0.046632	-0.161415	0.254147	-0.444967
2	PF14_0416||PF3D7_1443800||zinc finger protein, putative	0.069462	0.231174	0.67565	0.270436	-1.0793	-0.670473	-0.069462	-0.588504	-0.093937	0.250514	0.114425	-0.950348	-0.194054	0.093937	0.215311	-1.36622	-1.14876	-0.901647	-0.745112	-0.85894	-0.100117	-0.156577	0.100886	-0.415871
2	PFE0520c||PF3D7_0510500||topoisomerase I	0.116591	0.218149	0.236494	-0.116591	-1.42274	-0.546744	0.17013	-0.881604	-0.200936	0.140482	0.307126	-0.296636	-0.105746	0.105746	0.327006	-0.868069	-1.53933	-0.764893	-0.066364	-0.765013	0.09519	-0.034736	0.01988	-0.571433
2	MAL8P1.9||PF3D7_0829300||u6 snRNA-associated Sm-like protein, putative	0.230131	-0.028989	0.540929	0.028989	-1.66561	-0.420415	0.290762	-1.16492	-0.065602	0.313711	0.128721	-0.77949	-0.380099	0.065602	0.067784	-0.662639	-1.89574	-0.391426	-0.250167	-1.19391	-0.314497	-0.248109	-0.060937	0.116851
2	PFB0865w||PF3D7_0218500||small nuclear ribonucleoprotein, putative	0.410123	0.290214	0.392713	-0.419241	0.512575	-0.723123	-0.290214	-1.59652	0.133841	0.320882	-0.125497	-1.24653	-0.044413	0.251935	0.044413	-1.01478	0.102452	-1.01334	-0.682927	-1.17728	-0.178254	-0.068947	0.16991	0.231753
2	PF10_0023||PF3D7_1001900||Plasmodium exported protein (hyp16), unknown function	0.551404	2.45987	-0.306596	0.956142	0.306596	-0.484977	-1.77675	-1.41505	1.79779	-0.147266	-1.36025	0.147266	1.66511	0.286369	-1.19916	-0.177378	-0.244808	-2.94485	-1.47016	-2.37119	-0.132679	0.433635	0.161092	-0.324644
2	PFI0120c||PF3D7_0902500||serine/threonine protein kinase, FIKK family	0.184117	2.01106	-1.4395	0.703094	0.438711	-0.184117	-1.40484	-1.30516	1.93055	-0.137463	-2.079	0.324412	1.81686	0.137463	-1.91401	-0.152053	0.254594	-2.19518	0.034663	-2.00826	-0.113687	0.274926	0.164993	-0.476465
2	PF13_0162||PF3D7_1329500||conserved Plasmodium protein, unknown function	0.692838	1.89678	-0.963413	0.482344	0.043269	-0.043269	-1.13866	-1.82239	1.88699	-0.133062	-0.916032	0.133062	2.18788	0.412305	-1.16259	-0.319808	-0.649569	-1.94005	-0.175248	-2.30473	0.300889	0.545367	-0.246555	-0.45287
2	PF11_0505||PF3D7_1148900||probable protein, unknown function	0.330868	2.50784	-1.39558	0.045023	0.001407	-0.001407	-2.32843	-1.53509	1.88	0.160177	-2.27636	-0.160177	1.67092	0.556995	-1.97466	-0.353193	-0.329461	-2.50925	-0.932851	-1.58012	-0.209083	0.396818	0.301698	-0.193016
2	PF10_0025||PF3D7_1002100||PF70 protein	0.142871	1.8925	-0.883208	0.962995	0.582849	-0.142871	-2.23979	-1.83784	2.35109	-0.628492	-1.44522	0.568404	1.99076	0.014836	-1.53443	-0.014836	0.439978	-2.03537	-1.35659	-2.80083	-0.360327	0.643328	-0.089209	-0.58324
2	PFB0485c||PF3D7_0210800||conserved Plasmodium protein, unknown function	0.523874	1.57454	-0.521165	0.300782	-0.020402	0.020402	-0.535776	-1.08716	1.30733	0.176929	-1.40449	-0.176929	0.869533	0.366255	-1.05851	-0.382835	-0.544276	-1.55414	-0.014611	-1.38794	-0.437797	0.189326	0.345974	-0.205906
2	PFD1165w||PF3D7_0424500||serine/threonine protein kinase, FIKK family	0.78657	2.30829	-1.14353	0.768092	-0.051637	0.051637	-0.935931	-0.853444	1.19849	-0.085065	-2.13086	0.085065	1.21358	0.158862	-1.95812	-0.375748	-0.838207	-2.25665	0.207598	-1.62154	0.015095	0.243927	0.172738	-0.460813
2	MAL7P1.173||PF3D7_0731200||Plasmodium exported protein, unknown function	0.06196	2.18877	-0.351438	1.37967	0.484017	-0.06196	-0.478368	-0.494821	1.60229	-0.658168	-1.26216	0.780393	1.53658	-0.408841	-1.17054	0.408841	0.422057	-2.25073	-0.12693	-1.8745	-0.065708	0.249327	0.091626	-0.371552
2	PF14_0159||PF3D7_1416100||root hair defective 3 GTP-binding protein (RHD3) homolog, putative	0.05265	0.817758	0.751105	0.787766	-0.05265	-0.673858	-0.787293	-0.588915	0.197592	-0.242208	0.21617	0.304034	0.020156	-0.172784	-0.093972	-0.020156	-0.1053	-1.49162	-1.5384	-1.37668	-0.177436	0.069424	-0.310142	-0.32419
2	PF14_0277||PF3D7_1429800||coatamer beta subunit, putative	0.087858	0.624147	0.530583	0.355992	-0.331195	-0.294446	-0.087858	-0.646127	0.105058	-0.079374	0.214105	-0.128905	0.079374	-0.079994	0.13123	-0.326503	-0.419053	-0.918593	-0.618441	-1.00212	-0.025684	-0.00062	-0.082875	-0.197598
2	MAL13P1.179||PF3D7_1336000||conserved Plasmodium protein, unknown function	0.152934	0.544917	0.353821	0.049611	-0.251809	-0.298964	-0.049611	-0.556605	0.3693	0.125242	-0.126923	-0.460248	0.246555	0.175882	-0.125242	-0.548041	-0.404743	-0.843881	-0.403432	-0.606216	-0.122745	0.05064	0.001681	-0.087793
2	PFC1065w||PF3D7_0323800||conserved Plasmodium protein, unknown function	0.964117	1.12079	0.557326	0.20527	-0.20527	-0.428933	-0.378235	-0.679562	0.31747	0.377726	-0.047122	-0.811298	0.331174	-0.049825	0.047122	-1.07106	-1.16939	-1.54972	-0.935561	-0.884832	0.013704	-0.427551	0.094244	-0.259763
2	PF14_0193||PF3D7_1419900||conserved protein, unknown function	0.739831	0.93859	0.344903	0.253617	-0.253617	-0.333975	-0.64292	-0.481509	0.435141	0.319749	-0.423013	-0.525888	0.276532	0.261382	-0.261382	-0.485691	-0.993448	-1.27257	-0.987823	-0.735126	-0.158609	-0.058367	0.161631	0.040197
2	PF14_0316||PF3D7_1433500||DNA topoisomerase II, putative	0.045889	1.62727	0.078379	1.08644	-0.045889	-0.057637	-0.196547	-0.57853	0.602673	-0.779477	-0.467417	0.996309	0.400725	-0.720608	-0.400725	0.483108	-0.091778	-1.68491	-0.274926	-1.66497	-0.201948	0.058869	0.066692	-0.513201
2	PF07_0011||PF3D7_0703100||conserved Plasmodium protein, unknown function	0.304479	0.132747	0.510512	-0.031489	0.031489	-0.68097	-0.292738	-0.240291	-0.084331	0.259701	0.135476	-0.762249	-0.372653	0.209757	0.084331	-0.461124	-0.27299	-0.813717	-0.80325	-0.208802	-0.288322	-0.049944	-0.051145	0.301125
2	PFF1240w||PF3D7_0625600||poly(A) polymerase PAP, putative	0.935827	1.67892	0.076152	0.379416	-0.360381	-0.076152	-0.754072	-1.14959	1.09033	0.182927	-0.812504	-0.182927	0.990663	0.597818	-0.617871	-0.45873	-1.29621	-1.75507	-0.830224	-1.529	-0.099671	0.414891	0.194633	-0.275803
2	MAL8P1.204||PF3D7_0831200||DnaJ protein, putative	0.315887	1.07304	0.217974	0.453715	-0.293756	-0.217974	-0.625614	-0.749091	1.13815	0.091422	-0.091422	-0.223063	0.628387	0.493498	-0.340997	-0.152836	-0.609643	-1.29102	-0.843588	-1.20281	-0.509767	0.402076	-0.249575	0.070227
2	PFB0085c||PF3D7_0201700||DnaJ protein, putative	0.017167	1.79587	-1.89648	0.637355	-0.017167	0.277175	-0.38833	-1.23402	2.35084	-0.40424	-2.13079	0.527416	2.36844	0.084004	-2.04396	-0.084004	-0.034334	-1.5187	1.50815	-1.87138	0.017597	0.488244	0.086829	-0.61142
2	PF14_0464||PF3D7_1448600||SNARE protein, putative	0.518721	0.456029	0.848917	0.362131	-0.389236	-0.362131	-0.54931	-0.381489	-0.012454	0.126686	0.012454	-0.434904	-0.21633	0.183933	0.088525	-0.366325	-0.907957	-0.81816	-1.39823	-0.74362	-0.203876	0.057247	0.076071	0.068579
2	PF14_0481||PF3D7_1450600||conserved Plasmodium protein, unknown function	0.979915	0.992211	0.58866	-0.185709	-0.130924	0.130924	-0.400614	-0.355649	0.379953	0.610482	-0.102666	-1.23499	0.102666	0.784522	-0.107644	-0.812199	-1.11084	-0.861287	-0.989274	-0.16994	-0.277287	0.17404	-0.004978	0.42279
2	PFL2530w||PF3D7_1252600||lysophospholipase, putative	0.428638	1.85444	0.087345	1.0167	-0.087345	-0.831796	-1.68355	-1.1857	1.16672	-0.217684	-0.711104	0.114855	0.961415	-0.042232	-0.757993	0.042232	-0.515983	-2.68624	-1.7709	-2.2024	-0.205309	0.175452	-0.046889	-0.072623
2	PF14_0188||PF3D7_1419400||conserved Plasmodium membrane protein, unknown function	0.850695	0.892691	0.411	0.168064	-0.295383	-0.168064	-0.390962	-1.04622	0.18386	0.373921	-0.222063	-0.646582	0.305128	0.180486	-0.180486	-1.0931	-1.14608	-1.06075	-0.801962	-1.21429	0.121268	-0.193435	0.041577	-0.446519
2	PF13_0210||PF3D7_1337500||conserved Plasmodium protein, unknown function	0.432074	0.599369	0.239967	0.060142	-0.387177	-0.131789	-0.060142	-0.778358	0.620682	0.334645	-0.145353	-0.230444	0.76622	0.145353	-0.305458	-0.691439	-0.819251	-0.731158	-0.300109	-0.8385	0.145538	-0.189292	-0.160105	-0.460995
2	PFL2265c||PF3D7_1247200||conserved Plasmodium protein, unknown function	0.900631	0.84045	0.606688	0.075578	-0.127101	-0.302995	-0.111095	-0.075578	0.1971	0.113526	-0.417119	-0.846319	0.062323	0.37188	-0.062323	-0.729799	-1.02773	-1.14345	-0.717783	-0.151156	-0.134777	0.258354	0.354796	0.11652
2	PF10_0177b||PF3D7_1018300||conserved Plasmodium protein, unknown function	0.58722	1.14486	0.177203	0.7561	-0.305494	-0.177203	-0.317261	-0.713528	0.299206	-0.348507	-0.545033	0.594649	0.300572	-0.305482	-0.299206	0.465497	-0.892714	-1.32206	-0.494464	-1.46963	0.001366	0.043025	0.245827	-0.129152
2	PF14_0553||PF3D7_1458000||cysteine proteinase falcipain 1	0.939225	1.31514	0.17931	0.474851	-0.55633	-0.17931	-0.418645	-1.15729	0.58411	0.13865	-0.673928	-0.088512	0.714357	0.088512	-0.482629	-0.64288	-1.49555	-1.49445	-0.597955	-1.63214	0.130247	-0.050138	0.191299	-0.554368
2	PF13_0362||PF3D7_1369700||U1 small nuclear ribonucleoprotein a, putative	0.438506	1.12255	0.44423	0.296051	-0.33522	-0.32814	-0.396022	-0.296051	0.341503	0.243102	0.029912	-0.580886	-0.065339	0.335549	-0.029912	-0.580595	-0.773726	-1.45069	-0.840252	-0.592102	-0.406842	0.092447	-0.059824	0.000291
2	PF11_0152||PF3D7_1114200||GTPase activator, putative	1.14635	2.53829	0.069788	1.53688	-0.096169	-0.069788	-0.878852	-0.615753	0.857875	-0.213604	-1.39244	0.370208	0.603587	0.081088	-1.23687	-0.081088	-1.24252	-2.60808	-0.94864	-2.15264	-0.254288	0.294692	0.155567	-0.451296
2	PFD0095c||PF3D7_0402100||Plasmodium exported protein (PHISTb), unknown function	0.695175	3.25126	-0.388329	1.98755	-0.102931	0.102931	-0.734282	-1.10852	1.41501	-0.714731	-1.87221	1.64498	1.64403	-0.654983	-1.51399	0.654983	-0.798106	-3.14833	-0.345953	-3.09607	0.229018	0.059748	0.358224	-0.990001
2	PF13_0274||PF3D7_1352800||vacuolar fusion protein MON1, putative	0.382216	0.615189	0.627813	-0.048848	-0.069006	-0.53215	0.048848	-0.201292	0.027417	0.37805	-0.027417	-0.713149	-0.0882	0.469513	0.032334	-0.650999	-0.451222	-1.14734	-0.578965	-0.152444	-0.115617	0.091463	0.059751	0.06215
2	PFE0665c||PF3D7_0513400||GTP binding protein, putative	0.472848	0.15264	0.380093	-0.283618	-0.243968	-0.478494	0.131681	-0.131681	-0.129322	0.129322	0.227893	-0.888883	-0.461901	0.368228	0.294331	-0.383079	-0.716816	-0.631134	-0.248412	0.151937	-0.332579	0.238906	0.066438	0.505804
2	MAL7P1.138||PF3D7_0725100||conserved Plasmodium membrane protein, unknown function	0.149912	0.560187	0.429523	0.179637	-0.596158	-0.149912	-0.265685	-0.859568	0.062539	0.430726	-0.069594	-0.211239	-0.062539	0.405738	0.161562	-0.097907	-0.74607	-0.710099	-0.695208	-1.0392	-0.125078	-0.024988	0.231156	0.113332
2	PF14_0047||PF3D7_1405000||conserved Plasmodium protein, unknown function	0.023983	0.822512	0.828007	0.349539	-0.31891	-0.499921	-0.246039	-0.023983	0.107339	-0.035324	0.289869	-0.116238	0.035324	-0.095334	0.347109	-0.266243	-0.342893	-1.32243	-1.07405	-0.373522	-0.072015	-0.06001	0.05724	-0.150005
2	PF13_0253||PF3D7_1347700||ethanolamine-phosphate cytidylyltransferase, putative	0.082455	1.51435	-0.044868	0.681195	-0.481184	-0.3631	0.044868	-1.09837	0.960123	-0.268129	-0.561168	0.679924	0.946543	-0.303329	-0.537763	0.268129	-0.563639	-1.87745	0.089736	-1.77956	-0.01358	-0.0352	0.023405	-0.411795
2	PF10_0158||PF3D7_1016200||conserved Plasmodium protein, unknown function	0.465923	0.770636	0.282502	0.338611	-0.758278	-0.634276	-0.392665	-0.282502	0.229306	0.171621	-0.317748	0.061023	-0.036491	0.036491	-0.196812	-0.239386	-1.2242	-1.40491	-0.675167	-0.621113	-0.265797	-0.13513	0.120936	-0.300409
2	PF13_0203||PF3D7_1336700||conserved Plasmodium protein, unknown function	0.896751	1.51222	0.397134	0.160427	-0.245568	-0.160427	-0.616949	-0.712968	0.310195	0.081465	-0.465291	-0.081465	0.205548	0.229287	-0.187023	-0.258965	-1.14232	-1.67264	-1.01408	-0.873395	-0.104647	0.147822	0.278268	-0.1775
2	PF14_0476||PF3D7_1450000||serine/threonine protein kinase, putative	0.026853	0.943002	0.033277	1.13956	-0.71096	-0.601697	-0.026853	-1.14876	0.321161	-0.463	-0.886831	0.670509	0.293269	-0.210033	-0.780526	0.210033	-0.737813	-1.5447	-0.06013	-2.28832	-0.027892	0.252967	0.106305	-0.460476
2	PF14_0407||PF3D7_1442900||guanine nucleotide exchange factor, putative	0.157833	0.610593	0.388412	0.310834	-0.468906	-0.228894	-0.157833	-0.961986	0.502139	-0.004195	0.145261	-0.087957	0.68354	0.004195	-0.128184	-0.306239	-0.626739	-0.839487	-0.546245	-1.27282	0.181401	0.00839	-0.273445	-0.218282
2	PF11_0419||PF3D7_1140800||conserved Plasmodium protein, unknown function	0.7457	1.07676	0.575209	0.339746	-0.529605	-0.339746	-0.462985	-0.566186	0.084262	0.209764	-0.366807	-0.647374	0.098837	0.138643	-0.084262	-0.718193	-1.2753	-1.41651	-1.03819	-0.905932	0.014575	-0.071121	0.282545	-0.070819
2	PF14_0136||PF3D7_1413800||diphthamide synthesis protein, putative	1.18246	1.51232	-0.369892	0.606429	-0.253013	0.132573	-0.132573	-0.685102	0.456597	0.084064	-1.81043	-0.084064	0.137307	0.286831	-1.42511	-0.173503	-1.43547	-1.37974	0.237319	-1.29153	-0.31929	0.202767	0.385325	-0.089439
2	MAL7P1.10||PF3D7_0702900||centrin, putative	0.567533	0.472633	0.659252	0.014055	-0.572518	-0.03206	-0.014055	-1.07851	-0.006113	0.118331	0.006113	-1.0635	-0.344651	0.048836	0.125056	-0.763097	-1.14005	-0.504693	-0.673307	-1.09256	-0.338538	-0.069495	0.118943	0.300399
2	PFI0650c||PF3D7_0913300||conserved Plasmodium protein, unknown function	1.19115	1.33389	0.403673	-0.25321	-0.294986	0.25321	-0.297159	-0.711395	0.277334	0.207613	-0.233029	-1.17237	0.193973	0.277365	-0.193973	-1.3169	-1.48613	-1.08068	-0.700832	-0.458185	-0.083361	0.069752	0.039056	-0.14453
2	PFE0120c||PF3D7_0502400||merozoite surface protein 8,ring-stage membrane protein 1	1.18604	1.92576	-0.314618	0.252736	-0.172968	0.172968	-0.31941	-1.26621	1.2969	0.349197	-1.45333	-0.349197	1.42486	0.481974	-1.231	-0.668192	-1.35901	-1.75279	-0.004792	-1.51894	0.127966	0.132777	0.222329	-0.318995
2	PF11_0504||PF3D7_1148800||Plasmodium exported protein (hyp11), unknown function	0.395513	1.30429	-0.453895	0.70838	0.338656	-0.338656	-0.841076	-0.386686	1.72612	0.129856	-0.832651	-0.062562	1.43294	0.062562	-0.701114	-0.289964	-0.056857	-1.64295	-0.387181	-1.09507	-0.293176	-0.067294	0.131537	-0.227402
2	MAL13P1.277||PF3D7_1356700||DnaJ protein, putative	0.508128	1.48087	0.715749	1.04013	-0.664494	-0.508128	-0.738614	-0.581351	-0.077346	0.199814	-0.992522	0.248271	-0.169158	0.097057	-0.413451	0.077346	-1.17262	-1.989	-1.45436	-1.62148	-0.091812	-0.102757	0.579071	-0.170925
2	PFE1350c||PF3D7_0527100||ubiquitin conjugating enzyme 13, putative	-0.02105	0.539759	1.27043	0.544947	-0.513893	-0.549149	0.02105	-0.635955	-0.147577	0.052598	0.585099	-0.052598	-0.666794	0.080259	0.290034	-0.163131	-0.492843	-1.08891	-1.24938	-1.1809	-0.519217	0.027661	-0.295065	-0.110533
2	PFC0865w||PF3D7_0319500||RNA binding protein, putative	1.29975	1.19503	1.16875	-0.067433	-0.347935	0.040719	-0.040719	-0.302071	0.171488	0.104594	-0.36352	-1.45876	0.182989	0.07173	-0.07173	-1.93561	-1.64768	-1.15431	-1.20947	-0.234638	0.011501	-0.032864	0.29179	-0.476849
2	PF11_0402||PF3D7_1139100||conserved Plasmodium protein, unknown function	0.525094	0.948732	0.008288	0.290062	-0.444804	-0.008288	-0.135338	-0.710411	0.932956	0.440036	-0.275307	-0.230239	0.889398	0.141574	-0.141574	-0.702454	-0.969898	-0.95702	-0.143626	-1.00047	-0.043558	-0.298462	0.133733	-0.472215
2	MAL13P1.264||PF3D7_1352200||conserved Plasmodium protein, unknown function	1.19682	1.70831	0.002009	0.594895	-0.002009	-0.067735	-0.313788	-0.720964	0.303573	0.238009	-1.44526	-0.141189	0.141189	0.209135	-1.14871	-0.210351	-1.19883	-1.77604	-0.315797	-1.31586	-0.162384	-0.028874	0.296549	-0.069162
2	MAL7P1.204||PF3D7_0706500||conserved Plasmodium protein, unknown function	0.720824	0.654789	0.109438	0.27067	-0.669924	-0.130867	-0.109438	-1.20999	0.404663	0.395539	-0.148856	-0.335067	0.680084	-0.064932	0.064932	-0.855688	-1.39075	-0.785656	-0.218876	-1.48066	0.275421	-0.460471	0.213788	-0.520621
2	PF07_0095||PF3D7_0723000||tRNA His guanylyltransferase, putative	0.524223	1.05906	0.261505	0.269178	-0.316465	-0.261505	-0.263847	-0.48535	0.232949	0.239287	-0.052145	-0.064843	-0.031987	0.457793	-0.243767	0.031987	-0.840688	-1.32057	-0.525352	-0.754528	-0.264936	0.218506	-0.191622	0.09683
2	PF14_0260||PF3D7_1428200||metabolite/drug transporter, putative	-0.01891	1.34319	0.111671	0.789513	-0.801535	-0.187802	0.01891	-0.971686	0.283322	-0.151211	-0.665674	1.01472	0.151211	-0.157087	-0.61225	0.539238	-0.782625	-1.53099	-0.092761	-1.7612	-0.132111	-0.005876	0.053424	-0.475485
2	PFL1760w||PF3D7_1236400||conserved Plasmodium protein, unknown function	0.155389	0.904386	1.09726	0.518666	-0.155389	-0.336372	-0.247445	-0.388938	0.362642	0.004105	0.183397	-0.599324	-0.004105	-0.005861	0.192935	-0.466516	-0.310778	-1.24076	-1.3447	-0.907604	-0.366747	-0.009966	0.009538	0.132808
2	PFE0750c||PF3D7_0515000||RNA recognition motif, putative	0.746241	0.910742	0.671483	0.307851	-0.536279	-0.307851	-0.447518	-0.396135	0.267341	0.09187	0.06201	-0.537814	-0.372208	0.174266	-0.06201	-0.465536	-1.28252	-1.21859	-1.119	-0.703986	-0.639549	0.082396	-0.12402	0.072278
2	PFI0895c||PF3D7_0918300||eukaryotic translation initiation factor 3 subunit 5, putative	0.646637	1.00478	0.19884	-0.455274	-0.352656	-0.058608	0.058608	-1.13339	0.343356	0.58985	-0.219117	-1.03502	0.059789	0.824767	-0.059789	-1.5972	-0.999293	-1.06339	-0.140232	-0.678111	-0.283567	0.234917	0.159328	-0.56218
2	PF11_0349||PF3D7_1133900||conserved Plasmodium protein, unknown function	-0.036978	0.869169	1.10678	0.573441	-0.432215	-0.443827	0.036978	-0.520822	0.212363	-0.099693	0.099693	-0.555053	0.337604	-0.170874	0.181731	-0.997455	-0.395237	-1.313	-1.0698	-1.09426	0.125241	-0.071181	0.082038	-0.442402
2	PFI1110w||PF3D7_0922600||glutamine synthetase, putative	1.09698	1.74996	0.724495	0.259672	-0.603307	-0.259672	-0.395881	-1.72891	0.768533	0.082924	-0.3849	-0.858854	0.412172	0.488081	-0.082924	-0.783155	-1.70029	-2.00963	-1.12038	-1.98859	-0.356361	0.405157	0.301976	0.075699
2	PFI0920c||PF3D7_0918800||dihydrouridine synthase, putative	1.21876	1.70666	0.198564	0.076203	-0.076203	-0.077153	-0.595083	-0.640261	0.826502	0.350086	-0.861652	-0.443871	0.630833	0.328175	-0.431454	-0.328175	-1.29496	-1.78381	-0.793647	-0.716464	-0.195669	-0.021911	0.430198	0.115696
2	PF14_0201||PF3D7_1420700||surface protein, Pf113	0.794563	1.34232	-0.297068	0.297068	-0.701252	0.392681	-0.370793	-1.58884	0.369557	-0.082932	-0.747852	0.082932	0.855773	0.096963	-0.564783	-0.54374	-1.49581	-0.949636	-0.073725	-1.88591	0.486216	0.179895	0.183069	-0.626672
2	MAL13P1.76||PF3D7_1314900||TFIIH basal transcription factor subunit	1.37582	1.76996	0.965257	-0.022532	-0.181395	-0.022127	0.022127	-0.629176	0.627482	0.572133	-0.223528	-1.11004	0.083316	0.327871	-0.083316	-1.37008	-1.55721	-1.79208	-0.94313	-0.606644	-0.544166	-0.244262	0.140212	-0.260043
2	PFE1010w||PF3D7_0520100||protein phosphatase, putative	0.806596	1.1036	0.48912	-0.082981	-0.513942	-0.008982	0.008982	-0.710088	0.319891	0.455331	-0.218972	-1.10544	0.001652	0.485697	-0.001652	-1.09664	-1.32054	-1.11258	-0.480138	-0.627107	-0.318239	0.030366	0.21732	0.008802
2	PF13_0157||PF3D7_1327800||ribose-phosphate pyrophosphokinase, putative	1.19233	1.53382	0.477572	-0.09912	-0.292396	-0.053022	0.053022	-0.774317	0.339604	0.128419	-0.436533	-1.28107	0.106967	0.383545	-0.106967	-1.44617	-1.48473	-1.58684	-0.42455	-0.675197	-0.232637	0.255126	0.329566	-0.165093
2	PFF0330w||PF3D7_0606700||coatomer alpha subunit, putative	0.263075	0.723133	0.527303	0.387589	-0.732901	-0.528572	-0.263075	-1.10746	0.052748	0.024555	0.413462	-0.003481	-0.142961	-0.125565	0.003481	-0.164052	-0.995976	-1.25171	-0.790378	-1.49505	-0.195709	-0.15012	-0.409981	-0.160571
2	PFF0445w||PF3D7_0609000||conserved Plasmodium protein, unknown function	0.450027	0.418433	0.329337	0.041574	-0.675394	-0.263653	-0.041574	-0.941271	-0.225254	0.310829	0.207825	-0.295997	0.011947	0.248267	-0.011947	-0.332895	-1.12542	-0.682086	-0.370911	-0.982845	0.237201	-0.062562	-0.219772	-0.036898
2	PFF0930w||PF3D7_0619200||conserved Plasmodium protein, unknown function	0.207992	0.563374	0.341522	0.15894	-0.559779	-0.275853	-0.15894	-0.60364	0.371209	0.370638	-0.308983	-0.429101	0.306465	0.096788	-0.096788	-0.238036	-0.767771	-0.839227	-0.500462	-0.76258	-0.064744	-0.27385	0.212195	0.191065
2	PF11_0206||PF3D7_1119900||conserved Plasmodium protein, unknown function	0.363993	0.974913	0.336592	0.276539	-0.628697	-0.445765	-0.276539	-1.0061	0.379762	-0.019566	-0.144986	0.019566	0.488838	0.070454	-0.205351	-0.092326	-0.99269	-1.42068	-0.613131	-1.28264	0.109076	0.09002	-0.060365	-0.111892
2	PFC0810c||PF3D7_0318300||conserved Plasmodium protein, unknown function	0.461506	0.999104	0.874411	0.357425	-0.610008	-0.487463	-0.452086	-0.357425	0.22989	-0.06547	0.083245	-0.62635	0.047489	-0.047489	0.101219	-0.668003	-1.07151	-1.48657	-1.3265	-0.71485	-0.182401	0.017981	0.017974	-0.041653
2	PF14_0512||PF3D7_1453900||conserved Plasmodium protein, unknown function	1.08006	1.2327	0.109225	0.301938	-0.504117	-0.109225	-0.406237	-0.740617	0.860478	0.739043	-0.530869	-0.46518	0.79099	0.363354	-0.363354	-0.928874	-1.58418	-1.34193	-0.515462	-1.04255	-0.069488	-0.375689	0.167515	-0.463694
2	PFC0970w||PF3D7_0321900||conserved Plasmodium membrane protein, unknown function	0.113862	0.738002	0.694407	0.397988	-0.56597	-0.358035	-0.113862	-0.391097	0.219808	-0.128471	0.208683	-0.265237	0.225511	-0.088693	0.088693	-0.4014	-0.679832	-1.09604	-0.808269	-0.789085	0.005703	0.039778	-0.11999	-0.136163
2	PF14_0569||PF3D7_1459600||conserved Plasmodium protein, unknown function	0.326718	0.148267	0.456158	0.204856	-0.640628	-0.148267	-0.243982	-0.733342	0.309127	-0.126769	0.048932	-0.400993	0.175633	-0.048932	0.294729	-0.564004	-0.967346	-0.296534	-0.70014	-0.938198	-0.133494	0.077837	0.245797	-0.163011
2	MAL13P1.162||PF3D7_1330300||DnaJ protein, putative	0.243016	0.157303	0.917058	0.288937	-0.917747	-0.848548	-0.157303	-1.19257	-0.379939	0.408784	0.513828	-0.245315	-0.638312	0.245315	0.800214	-0.42721	-1.16076	-1.00585	-1.07436	-1.48151	-0.258373	-0.163469	0.286386	-0.181895
2	PFL0895c||PF3D7_1218500||conserved Plasmodium protein, unknown function	0.514509	2.17251	0.066585	1.05597	-0.332429	-0.066585	-1.27736	-0.98525	0.894996	-0.439328	-0.892689	0.447033	0.891476	-0.204977	-0.808643	0.204977	-0.846938	-2.2391	-1.34395	-2.04122	-0.00352	0.234351	0.084046	-0.242056
2	PFE1500c||PF3D7_0530000||conserved Plasmodium protein, unknown function	0.224361	0.69907	1.32921	0.64716	-0.742735	-1.28009	-0.224361	-0.920243	0.029373	-0.038598	0.464474	0.140939	-0.034475	-0.029373	0.826308	-0.162521	-0.967096	-1.97917	-1.55357	-1.5674	-0.063848	0.009225	0.361834	-0.30346
2	MAL13P1.13||PF3D7_1302500||conserved Plasmodium protein, unknown function	0.311221	0.637971	0.368391	0.188181	-0.65167	-0.836638	-0.188181	-0.55998	0.172465	-0.190052	0.338673	-0.524512	0.243996	-0.099146	0.099146	-0.571031	-0.962891	-1.47461	-0.556572	-0.748161	0.071531	0.090906	-0.239527	-0.046519
2	PFF1350c||PF3D7_0627800||acetyl-CoA synthetase	0.213812	0.452403	0.208235	0.115584	-0.470373	-0.145842	-0.115584	-0.748072	-0.228477	-0.015165	0.186928	0.150838	-0.371494	-0.078098	0.077495	0.015165	-0.684185	-0.598245	-0.323819	-0.863656	-0.143017	-0.062933	-0.109433	-0.135673
2	PFI0195c||PF3D7_0904000||GTPase activator, putative	0.751572	0.029801	0.383887	-0.377508	-0.625266	0.081456	-0.029801	-1.07103	0.287819	-0.280151	-0.045177	-1.03392	0.341306	0.051976	0.045177	-1.29932	-1.37684	0.051655	-0.413688	-0.693527	0.053487	0.332127	0.090354	-0.265405
2	PFD0285c||PF3D7_0405700||lysine decarboxylase, putative	0.777338	0.330286	0.14561	0.162981	-0.647848	-0.498037	-0.356522	-0.14561	-0.339954	0.791497	0.151927	-0.259329	-0.151927	0.841692	0.195743	-0.322543	-1.42519	-0.828323	-0.502132	-0.308591	0.188027	0.050195	0.043816	-0.063214
2	PF10_0322||PF3D7_1033100||S-adenosylmethionine decarboxylase/ornithine decarboxylase	0.485761	0.39816	-0.019696	0.230449	-0.926372	0.019696	-0.234224	-0.917295	-0.123663	0.054634	0.30022	-0.067792	0.010814	0.231182	-0.010814	-0.313346	-1.41213	-0.378464	-0.214528	-1.14774	0.134477	0.176548	-0.311034	-0.245554
2	PF13_0257||PF3D7_1349200||glutamate--tRNA ligase, putative	1.57313	1.11432	0.462718	-0.036171	0.036171	-0.260631	-0.068997	-1.16798	0.198373	0.216159	-0.337141	-1.06209	0.089548	0.437574	-0.089548	-0.769087	-1.53696	-1.37495	-0.531715	-1.13181	-0.108825	0.221415	0.247593	0.293006
2	PFL2455w||PF3D7_1251100||conserved Plasmodium protein, unknown function	0.400917	1.07944	0.739099	0.693095	-0.606542	-0.400917	-0.417415	-0.676874	0.253089	0.208086	-0.386058	-0.395166	0.068515	0.283394	-0.068515	-0.30791	-1.00746	-1.48036	-1.15651	-1.36997	-0.184574	0.075308	0.317543	0.087256
2	PF13_0041||PF3D7_1307700||conserved Plasmodium protein, unknown function	0.317228	0.989456	0.488033	1.06922	-0.918951	-0.317228	-0.615999	-1.23828	0.065935	-0.065935	-0.160067	0.8618	0.118915	-0.091885	-0.071272	0.282688	-1.23618	-1.30668	-1.10403	-2.3075	0.05298	-0.02595	0.088795	-0.579112
2	MAL13P1.14||PF3D7_1302700||DEAD/DEAH box ATP-dependent RNA helicase, putative	1.46303	1.36967	-0.089357	0.019243	-0.022044	0.382907	-0.051187	-0.019243	0.832319	0.851021	-0.837491	-0.773914	0.813135	0.748418	-0.748418	-1.05559	-1.48507	-0.986767	0.03817	-0.038486	-0.019184	-0.102603	0.089073	-0.281674
2	PFL0950c||PF3D7_1219600||aminophospholipid-transporting P-ATPase	0.239771	0.533857	0.233756	0.238668	-0.96927	-0.267587	-0.233756	-0.899544	-0.069496	0.190839	0.018903	0.226013	-0.312239	0.43251	-0.089293	-0.018903	-1.20904	-0.801444	-0.467512	-1.13821	-0.242743	0.241671	-0.108196	-0.244916
2	PFE0505w||PF3D7_0510200||cyclophilin, putative	0.132448	0.492142	0.602982	0.038442	-1.09399	-0.896621	-0.038442	-0.66206	0.01544	0.012246	0.252361	-0.317783	-0.072221	-0.012246	0.084168	-0.532348	-1.22644	-1.38876	-0.641424	-0.700502	-0.087661	-0.024492	-0.168193	-0.214565
2	MAL8P1.43||PF3D7_0822800||U5 snrnp-specific protein, putative	0.293395	0.773737	0.290257	-0.086633	-0.64503	0.025056	-0.025056	-0.81412	0.02514	0.2801	0.09387	-0.73418	-0.5794	0.110727	-0.02514	-0.534596	-0.938425	-0.748681	-0.315313	-0.727487	-0.60454	-0.169373	-0.11901	0.199584
2	PF11_0436||PF3D7_1142400||coproporphyrinogen III oxidase	0.130282	0.449193	0.363623	0.01748	-0.852866	-0.327686	-0.01748	-1.06655	0.16738	0.279952	-0.062153	-0.448612	-0.10472	0.222407	0.062153	-0.312397	-0.983148	-0.776879	-0.381103	-1.08403	-0.2721	-0.057545	0.124306	0.136215
2	PF14_0507||PF3D7_1453400||conserved Plasmodium protein, unknown function	0.047515	0.535124	0.695356	0.288627	-1.09523	-0.651677	-0.047515	-0.80971	-0.124982	0.256517	0.573795	-0.133682	-0.240901	0.124982	0.416681	-0.37951	-1.14274	-1.1868	-0.742871	-1.09834	-0.115919	-0.131535	-0.157114	-0.245828
2	PFL0035c||PF3D7_1200700||acyl-CoA synthetase, PfACS7	0.270894	1.38942	-1.63582	0.556091	0.48293	-0.270894	-1.53001	-1.68529	2.59523	-0.557075	-2.08845	0.2649	2.57778	0.163091	-1.98731	-0.163091	0.212036	-1.66032	0.10581	-2.24138	-0.017456	0.720166	0.101136	-0.427991
2	PFI1130c||PF3D7_0923000||DNA-directed RNA polymerase II, putative	1.64013	1.7107	0.751275	0.198602	-0.38429	-0.198602	-0.463844	-0.840215	0.516069	0.670206	-0.275529	-1.10767	0.038814	0.477225	-0.038814	-1.22473	-2.02442	-1.9093	-1.21512	-1.03882	-0.477255	-0.192981	0.236715	-0.117069
2	PFA0525w||PF3D7_0110800||transcription initiation factor TFIIB, putative	0.383767	0.643139	0.040205	0.353125	-1.08858	-0.528412	-0.040205	-1.24498	0.157	0.044116	-0.434646	0.397362	0.112493	-0.044116	-0.135343	-0.070434	-1.47235	-1.17155	-0.08041	-1.59811	-0.044507	-0.088232	0.299303	-0.467796
2	PF07_0071||PF3D7_0717400||queuine tRNA-ribosyltransferase, putative	0.905104	1.00308	-0.099512	0.558828	-0.577422	-0.080634	0.080634	-0.228129	0.307288	0.40726	-0.732742	-0.03954	0.03954	0.320021	-0.80198	-0.1302	-1.48253	-1.08371	0.180146	-0.786957	-0.267748	-0.087239	-0.069238	-0.09066
2	PFC0690c||PF3D7_0315800||conserved Plasmodium protein, unknown function	0.831765	1.08277	0.568029	0.197572	-0.431474	-0.244646	-0.197572	-0.465307	0.413229	0.129736	-0.241218	-0.655736	0.260215	0.122996	-0.122996	-0.755026	-1.26324	-1.32742	-0.765601	-0.662879	-0.153014	-0.00674	0.118222	-0.09929
2	PFB0575c||PF3D7_0212700||conserved Plasmodium protein, unknown function	0.929547	0.384038	0.714067	-0.078538	-0.569103	-0.407114	0.078538	-0.212919	-0.217112	0.419546	0.163682	-0.747014	-0.263641	0.684101	0.528883	-0.163682	-1.49865	-0.791152	-0.635529	-0.134381	-0.046529	0.264555	0.365201	0.583332
2	PF13_0031||PF3D7_1305900||conserved Plasmodium protein, unknown function	0.610842	0.119269	0.363679	-0.119269	-0.609438	-0.475904	0.421015	-0.513583	-0.058914	0.72921	0.058914	-0.493627	-0.200651	0.589746	0.422254	-0.461491	-1.22028	-0.595173	0.057336	-0.394314	-0.141737	-0.139464	0.36334	0.032136
2	PFF0125c||PF3D7_0602600||conserved Plasmodium protein, unknown function	0.687219	0.862983	0.365424	0.006312	-0.394661	-0.188028	-0.006312	-0.880852	0.285469	0.162857	-0.163775	-0.616515	0.285473	0.19196	-0.162857	-0.822368	-1.08188	-1.05101	-0.371736	-0.887164	4e-06	0.029103	0.000918	-0.205853
2	MAL8P1.21||PF3D7_0826600||SNARE protein, putative	0.843371	0.514827	0.800354	0.236361	-0.832093	-0.44645	-0.236361	-0.894998	-0.428313	0.817139	0.277982	-0.286034	-0.508986	0.664312	0.220219	-0.220219	-1.67546	-0.961277	-1.03672	-1.13136	-0.080673	-0.152827	-0.057763	0.065815
2	PF14_0365||PF3D7_1438600||conserved Plasmodium protein, unknown function	0.869904	1.33882	0.858376	0.139852	-0.674215	-0.771063	-0.139852	-0.93012	0.571712	0.00793	-0.211021	-0.739573	0.043382	0.412379	-0.00793	-0.614667	-1.54412	-2.10989	-0.998228	-1.06997	-0.52833	0.404449	0.203091	0.124906
2	PF10_0143||PF3D7_1014600||transcriptional coactivator ADA2	0.149751	0.400323	0.548092	0.512024	-1.02393	-0.149751	-0.2711	-0.97354	-0.122443	-0.085337	0.111867	0.068362	0.140136	-0.033734	0.033734	-0.206709	-1.17368	-0.550074	-0.819192	-1.48556	0.262579	0.051603	-0.078133	-0.275071
2	PF14_0358||PF3D7_1437800||41-2 protein antigen precursor,transport protein particle (TRAPP) component, Bet3	0.51374	1.0681	1.12213	0.221551	-0.370246	-0.221551	-0.387677	-0.405723	0.030936	0.13153	0.369395	-0.43145	-0.150972	-0.030936	0.475554	-0.332871	-0.883986	-1.28965	-1.50981	-0.627274	-0.181908	-0.162466	0.106159	0.098579
2	PF14_0344||PF3D7_1436300||translocon component PTEX150	1.27711	2.71899	-1.00522	1.12429	-0.565548	0.565548	-0.964568	-1.62557	0.961738	-0.322147	-2.12386	0.709809	1.24258	0.223062	-2.03241	-0.223062	-1.84266	-2.15344	0.040654	-2.74986	0.280841	0.545209	0.09145	-0.932871
2	PF13_0212||PF3D7_1337900||conserved Plasmodium protein, unknown function	0.263282	0.055741	-0.246474	0.048488	-0.479435	0.199835	-0.048488	-0.993468	0.976781	-0.060288	-0.842793	0.308138	0.170362	-0.079746	-0.512656	0.060288	-0.742717	0.144094	0.197986	-1.04196	-0.806419	-0.019458	0.330137	-0.24785
2	MAL7P1.126||PF3D7_0723900||conserved Plasmodium protein, unknown function	0.443203	0.651395	0.61297	0.171132	-0.678246	-0.323804	-0.171132	-0.641279	0.076174	0.083227	0.016821	-0.62933	0.333367	-0.016821	-0.137155	-0.644145	-1.12145	-0.975199	-0.784102	-0.812411	0.257193	-0.100048	-0.153976	-0.014815
2	PF10_0361||PF3D7_1036900||conserved Plasmodium protein, unknown function	0.724664	0.765158	0.167623	0.348797	-1.21228	-0.167623	-0.402753	-1.4723	0.619034	0.194449	-0.084967	0.017523	0.955341	-0.017523	-0.2817	-0.840074	-1.93695	-0.932781	-0.570376	-1.8211	0.336307	-0.211972	-0.196733	-0.857597
2	MAL13P1.233||PF3D7_1346300||DNA/RNA-binding protein Alba, putative	1.40932	0.967101	0.433847	0.339848	-0.339848	-0.38793	-0.77574	-1.46244	1.00869	0.101114	-0.101114	-0.9308	0.328068	0.613997	-0.204255	-0.947511	-1.74917	-1.35503	-1.20959	-1.80229	-0.68062	0.512883	-0.103141	-0.016711
2	PFE0870w||PF3D7_0517400||transcriptional regulator, putative	0.556259	-0.135941	0.854773	0.135941	-0.583651	-0.214479	0.170456	-0.228023	-0.326863	0.308634	0.928414	-0.308634	-0.347444	0.336166	0.902262	-0.388562	-1.13991	-0.078538	-0.684317	-0.363964	-0.020581	0.027532	-0.026152	-0.079928
2	PF14_0055||PF3D7_1405800||large subunit rRNA processing protein, putative	1.11305	1.40727	-0.500395	0.074289	-0.53943	0.037699	-0.037699	-1.00337	0.381438	0.365524	-1.11523	-0.365524	0.377517	0.482468	-0.863798	-1.12422	-1.65248	-1.36957	0.462696	-1.07766	-0.003921	0.116944	0.251436	-0.758697
2	PF11_0166||PF3D7_1115800||conserved Plasmodium protein, unknown function	0.247692	1.48841	-0.352239	0.905469	-0.001706	0.001706	-0.644562	-1.28328	1.57677	-0.715735	-1.3455	1.23059	1.83086	-0.33043	-1.29035	0.33043	-0.249398	-1.4867	-0.292323	-2.18875	0.254098	0.385305	0.055146	-0.900157
2	PF13_0309||PF3D7_1357700||U3 snoRNA-associated small subunit rRNA processing protein, putative	1.35562	1.49645	0.081341	-0.081341	-0.386274	0.283415	-0.117935	-0.800754	0.867252	0.815788	-0.891755	-1.24342	0.869854	0.534188	-0.534188	-1.51773	-1.74189	-1.21304	-0.199276	-0.719413	0.002602	-0.2816	0.357567	-0.274309
2	PF13_0224||PF3D7_1341200||60S ribosomal protein L18, putative	1.52566	2.01353	1.15049	-0.18389	-1.04407	0.18389	-0.626672	-2.32112	0.406803	0.340476	-0.36663	-1.51515	0.136387	0.66043	-0.136387	-1.6961	-2.56973	-1.82964	-1.77716	-2.13723	-0.270416	0.319954	0.230243	-0.180953
2	MAL13P1.349||PF3D7_1369200||conserved Plasmodium protein, unknown function	0.347838	0.739244	0.364535	0.048644	-0.689052	-0.298894	-0.048644	-0.602469	0.229607	0.171853	0.001483	-0.399021	0.536802	-0.054069	-0.001483	-0.59261	-1.03689	-1.03814	-0.413179	-0.651113	0.307195	-0.225922	-0.002966	-0.193589
2	MAL8P1.31||PF3D7_0824600||anamorsin related protein, putative	1.09517	1.11053	0.626082	0.195352	-0.684499	-0.239824	-0.195352	-0.43977	0.383427	0.204051	-0.798615	-1.17486	0.266598	0.480279	-0.204051	-0.680997	-1.77967	-1.35036	-0.821434	-0.635122	-0.116829	0.276228	0.594564	0.493861
2	PF10_0369||PF3D7_1037600||DNA repair helicase rad25, putative	0.561836	0.925084	0.5259	0.265487	-0.489331	-0.265487	-0.287919	-0.404125	0.280458	0.142804	-0.02884	-0.32668	0.02884	0.338511	-0.04238	-0.567889	-1.05117	-1.19057	-0.813819	-0.669612	-0.251618	0.195707	-0.01354	-0.241209
2	PFE1150w||PF3D7_0523000||multidrug resistance protein	0.913593	1.68021	0.077387	0.558519	-0.489723	-0.077387	-0.408988	-1.74188	0.648526	0.067946	-0.7438	-0.126046	0.680855	0.240326	-0.709055	-0.067946	-1.40332	-1.75759	-0.486375	-2.3004	0.032329	0.17238	0.034745	0.0581
2	PFE0745w||PF3D7_0514900||conserved Plasmodium protein, unknown function	0.199607	0.461014	0.852552	0.245187	-0.554015	-0.488576	-0.27428	-0.199607	0.163979	-0.148687	0.241842	-0.536866	0.243837	0.048678	-0.048678	-0.636797	-0.753622	-0.94959	-1.12683	-0.444794	0.079858	0.197365	-0.29052	-0.099931
2	PFE1360c||PF3D7_0527300||methionine aminopeptidase 1a, putative	0.362595	0.813892	0.449402	-0.073766	-0.45926	-0.406698	0.073766	-0.605227	-0.251717	0.193732	0.10105	-0.371126	-0.306064	0.237308	0.378783	-0.10105	-0.821855	-1.22059	-0.375636	-0.531461	-0.054347	0.043576	0.277733	0.270076
2	MAL8P1.103||PF3D7_0811400||conserved Plasmodium protein, unknown function	0.603839	0.805509	0.263407	-0.149309	-0.739969	0.149309	-0.339492	-1.19065	0.000533	0.1137	-0.015896	-0.782443	0.009958	0.309731	-0.000533	-1.0067	-1.34381	-0.6562	-0.602899	-1.04134	0.009425	0.196031	0.015363	-0.224258
2	PFB0540w||PF3D7_0212100||conserved Plasmodium protein, unknown function	0.259074	0.543837	0.848314	0.305492	-1.08316	-0.602114	-0.259074	-0.600406	0.011783	-0.044775	0.613038	-0.243549	0.061414	-0.011783	0.532141	-0.447442	-1.34223	-1.14595	-1.10739	-0.905898	0.049631	0.032992	-0.080897	-0.203893
2	PFI0625c||PF3D7_0912800||tRNA 1-methyladenosine methyltransferase subunit, putative	0.952293	1.29777	0.254574	0.024503	-0.70612	-0.024503	-0.309215	-0.927281	0.37036	0.618901	-0.488192	-0.931274	0.186938	0.488585	-0.186938	-0.90026	-1.65841	-1.32227	-0.563789	-0.951784	-0.183422	-0.130316	0.301254	0.031014
2	PF13_0339||PF3D7_1364200||conserved Plasmodium protein, unknown function	0.23598	0.879759	0.362775	0.362583	-0.945402	-0.562074	-0.23598	-1.08593	0.222279	0.01567	-0.01567	0.10905	0.128921	-0.070818	-0.1208	-0.255512	-1.18138	-1.44183	-0.598755	-1.44851	-0.093358	-0.086488	-0.10513	-0.364562
2	MAL13P1.327||PF3D7_1365100||mitochondrial ribosomal protein S17 precursor, putative	1.144	0.975514	0.78701	0.290134	-0.581939	-0.290134	-0.487019	-0.533474	0.329348	0.5693	-0.586117	-1.31835	0.211	0.417167	-0.211	-1.72721	-1.72594	-1.26565	-1.27403	-0.823608	-0.118348	-0.152133	0.375117	-0.408853
2	PF14_0137||PF3D7_1413900||DnaJ protein, putative	0.289466	1.02655	0.958839	0.135485	-0.833313	-0.399137	-0.135485	-0.95052	-0.028041	0.028041	0.272498	-0.710907	-0.369553	0.275425	0.246493	-0.535039	-1.12278	-1.42569	-1.09432	-1.08601	-0.341512	0.247384	-0.026005	0.175868
2	PF11_0526||PF3D7_1112500||conserved Plasmodium protein, unknown function	0.756928	0.489236	0.54485	-0.142821	0.086686	-0.106451	-0.086686	-0.153843	0.357866	0.55365	-0.469297	-1.41533	0.198068	0.290483	-0.198068	-1.29275	-0.670242	-0.595687	-0.631536	-0.011022	-0.159798	-0.263167	0.271229	0.122582
2	PF08_0029||PF3D7_0824500||conserved Plasmodium protein, unknown function	0.757323	0.035115	1.00976	-0.035115	-0.467385	-0.162078	0.075664	-0.143381	-0.416563	0.424262	0.416563	-1.06642	-0.635437	0.417017	0.68528	-0.833552	-1.22471	-0.197193	-0.934092	-0.108266	-0.218874	-0.007245	0.268717	0.23287
2	PF14_0087||PF3D7_1409000||conserved Plasmodium protein, unknown function	1.15055	1.09434	0.64542	-0.011217	-0.283731	-0.018295	0.011217	-0.233809	0.19761	0.308119	-0.048844	-0.821506	0.018833	0.465838	-0.018833	-0.841938	-1.43429	-1.11263	-0.634203	-0.222592	-0.178777	0.157719	0.030011	-0.020432
2	PFF1370w||PF3D7_0628200||protein kinase PK4	0.398988	0.870554	0.505991	0.291891	-0.81364	-0.519058	-0.291891	-1.11842	0.051894	-0.038934	0.059271	-0.388654	0.199616	0.038934	-0.142792	-0.433808	-1.21263	-1.38961	-0.797882	-1.41031	0.147722	0.077868	-0.202063	-0.045154
2	PF10_0205||PF3D7_1021100||conserved Plasmodium protein, unknown function	0.155542	0.572434	0.305903	-0.0632	-1.14548	-0.554272	0.0632	-1.15393	0.081667	0.03593	-0.019516	-0.363484	-0.192424	0.019516	0.034582	-0.15563	-1.30102	-1.12671	-0.242703	-1.09073	-0.274091	-0.016414	0.054098	0.207854
2	PFL1315w||PF3D7_1227200||potassium channel protein	0.371155	0.668181	0.488722	-0.029838	-0.915765	-0.162244	0.029838	-0.736047	-0.053802	0.122284	0.301547	-0.523006	-0.015834	0.344366	0.015834	-0.598082	-1.28692	-0.830425	-0.458884	-0.706209	0.037968	0.222082	-0.285713	-0.075076
2	PF13_0122||PF3D7_1320900||RRM containing cyclophilin, putative	1.01447	1.20575	1.17035	0.253889	-0.334104	-0.253889	-0.695942	-0.361893	0.084751	0.234411	-0.187403	-1.13377	0.033005	0.256574	-0.033005	-1.03401	-1.34857	-1.45964	-1.86629	-0.615782	-0.051746	0.022163	0.154398	0.099764
2	PF14_0052||PF3D7_1405500||conserved Plasmodium protein, unknown function	1.19861	0.988368	0.381174	-0.365231	-0.443286	-0.002379	0.002379	-0.355774	0.465613	0.662061	-0.458727	-1.25734	0.236847	0.337582	-0.236847	-1.23531	-1.6419	-0.990747	-0.378795	0.009457	-0.228766	-0.324479	0.22188	0.022038
2	PFD0355c||PF3D7_0407200||peptidyl-tRNA hydrolase PTH2, putative	0.907194	1.1966	0.408922	0.089686	-0.490615	-0.131075	-0.089686	-0.114687	0.438021	0.33899	-0.744385	-0.80121	0.317597	0.405591	-0.317597	-0.723475	-1.39781	-1.32768	-0.498608	-0.204373	-0.120424	0.066601	0.426788	0.077735
2	PF08_0076||PF3D7_0813900||40S ribosomal protein S16, putative	1.68135	1.95558	1.24622	-0.098154	-0.819726	0.098154	-0.356091	-2.14196	-0.05455	0.422548	0.05455	-1.59127	-0.408718	0.617476	0.295735	-1.91755	-2.50107	-1.85743	-1.60231	-2.04381	-0.354168	0.194928	0.241185	-0.326285
2	PF11_0524||PF3D7_1107000||lsm4 homologue, putative	0.281334	0.228435	0.470027	-0.228435	-0.77964	-0.512042	0.724216	-0.429617	-0.287141	0.338459	0.421552	-0.565961	-0.586753	0.287141	0.532277	-0.602597	-1.06097	-0.740477	0.254189	-0.201182	-0.299612	-0.051318	0.110725	-0.036636
2	PF13_0076||PF3D7_1302000||Plasmodium exported protein, unknown function	1.58251	2.01246	-0.479913	0.198665	-0.198665	0.578622	-0.469343	-0.90039	1.35766	0.643795	-1.31506	-0.714916	1.1416	0.738016	-1.38109	-0.643795	-1.78118	-1.43384	0.01057	-1.09906	-0.216065	0.094221	-0.066027	0.071121
2	PF07_0057||PF3D7_0714500||transcription elongation factor s-II, putative	0.114724	0.325808	0.621158	0.121415	-0.92342	-0.671114	-0.114724	-0.591643	-0.068242	0.110729	0.413799	-0.447559	-0.003518	0.003518	0.497487	-0.614216	-1.03814	-0.996922	-0.735882	-0.713058	0.064724	-0.107211	0.083688	-0.166657
2	PFL0670c||PF3D7_1213800||bifunctional aminoacyl-tRNA synthetase, putative	1.48135	1.17774	0.883498	-0.047763	-0.592287	0.047763	-0.077896	-0.974502	0.034909	0.225621	-0.35627	-1.4224	0.062135	0.088768	-0.034909	-1.65813	-2.07363	-1.12998	-0.961394	-0.926739	0.027226	-0.136853	0.321361	-0.235726
2	MAL13P1.83||PF3D7_1315900||exportin 1-like protein, putative	0.486712	0.893465	0.580625	0.03205	-0.412659	-0.03205	-0.153361	-1.18142	0.020617	0.248087	0.104434	-0.40568	-0.322751	0.163042	-0.020617	-0.522937	-0.899371	-0.925515	-0.733986	-1.21347	-0.343368	-0.085045	-0.125051	-0.117257
2	PFE1340w||PF3D7_0526900||conserved Plasmodium protein, unknown function	1.09255	0.797135	0.835193	0.383117	-0.589859	-0.383117	-0.622885	-0.774071	0.166069	0.29742	0.160409	-1.03091	-0.201009	0.38752	-0.160409	-0.678362	-1.68241	-1.18025	-1.45808	-1.15719	-0.367078	0.0901	-0.320818	0.35255
2	PF11_0088||PF3D7_1107500||prefoldin, putative	0.652002	0.447284	0.579238	-0.297531	-0.778435	-0.458256	0.297531	-1.17491	-0.254313	0.471931	0.254313	-1.1944	-0.556771	0.604005	0.366864	-1.0169	-1.43044	-0.90554	-0.281707	-0.877374	-0.302458	0.132074	0.112551	0.177503
2	PF14_0428||PF3D7_1445100||histidine--tRNA ligase, putative	0.783102	0.839724	0.024911	-0.504139	-0.336254	0.416561	-0.024911	-0.788569	0.754976	0.316922	-0.495815	-1.17549	0.547914	0.477162	-0.316922	-1.48843	-1.11936	-0.423163	-0.049822	-0.28443	-0.207062	0.16024	0.178893	-0.312931
2	PFE1390w||PF3D7_0527900||RNA helicase 1	1.12075	1.14177	0.257596	-0.127715	-0.149905	0.013749	-0.013749	-0.373963	0.54868	0.211053	-0.439229	-1.16351	0.337732	0.454403	-0.211053	-1.09737	-1.27066	-1.12803	-0.271345	-0.246248	-0.210948	0.24335	0.228176	0.066138
2	PF11_0067||PF3D7_1105600||translocon component PTEX88	1.05916	2.72175	-0.078916	1.26543	-0.595998	0.078916	-0.713678	-1.88161	0.979094	0.029472	-1.53891	0.690368	0.690245	-0.029472	-1.37788	-0.233134	-1.65516	-2.64284	-0.634762	-3.14705	-0.288849	-0.058944	0.161028	-0.923502
2	PFI0470w||PF3D7_0909700||FHA domain protein, putative	0.757296	1.54561	0.500048	1.31161	-0.616964	-0.500048	-0.709828	-0.511784	0.487669	-0.083063	-0.763162	0.454722	0.622947	-0.154143	-0.702396	0.083063	-1.37426	-2.04566	-1.20988	-1.8234	0.135278	-0.07108	0.060766	-0.371659
2	PFL0130c||PF3D7_1202600||conserved protein, unknown function	0.32964	0.889698	1.05042	1.26643	-0.716678	-0.568629	-0.32964	-0.474976	-0.397744	-0.290872	0.29732	0.377787	-0.332543	-0.085408	0.085408	0.23232	-1.04632	-1.45833	-1.38006	-1.7414	0.065201	0.205464	-0.211912	-0.145467
2	PF11_0212||PF3D7_1120500||tRNA nucleotidyltransferase, putative	0.698572	0.65169	0.628143	0.061573	-0.777168	-0.635312	-0.061573	-0.724486	0.12134	0.070302	-0.221523	-0.841127	0.0678	0.299036	-0.0678	-0.817703	-1.47574	-1.287	-0.689716	-0.786059	-0.05354	0.228734	0.153723	0.023424
2	PFI0870w||PF3D7_0917800||conserved Plasmodium protein, unknown function	0.455227	1.52532	1.41614	0.903111	-0.575799	-0.485195	-0.605571	-0.455227	0.133489	0.02178	0.153612	-0.081014	-0.02178	-0.023318	0.072149	-0.108177	-1.03103	-2.01052	-2.02172	-1.35834	-0.155269	-0.045098	-0.081463	-0.027163
2	PF11_0378||PF3D7_1136600||conserved Plasmodium protein, unknown function	0.734104	0.956287	-0.502468	0.088164	-0.708412	0.157443	-0.088164	-0.804008	0.601339	0.522441	-0.528167	-0.342907	0.845166	0.342907	-0.346489	-0.730835	-1.44252	-0.798844	0.414304	-0.892172	0.243827	-0.179534	0.181678	-0.387928
2	MAL13P1.289||PF3D7_1359300||mitotic control protein dis3 homologue, putative	0.69719	0.338472	0.138321	-0.362059	-0.707364	0.088	-0.088	-0.770413	0.046638	0.235743	-0.226975	-1.04279	0.292152	0.284755	-0.046638	-1.20368	-1.40455	-0.250472	-0.226321	-0.408354	0.245514	0.049012	0.180337	-0.16089
2	PFF1260c||PF3D7_0626000||conserved Plasmodium protein, unknown function	0.847829	0.849141	0.248991	-0.204802	-0.923249	0.016816	-0.016816	-0.928365	0.173496	0.594942	-0.17396	-0.575147	0.106599	0.527096	-0.106599	-0.549015	-1.77108	-0.832325	-0.265807	-0.723563	-0.066897	-0.067846	0.067361	0.026132
2	PF10_0242||PF3D7_1024800||conserved Plasmodium protein, unknown function	1.24889	1.52763	-0.165544	0.312018	-0.408848	0.165544	-0.711823	-1.31443	1.39657	0.158274	-0.158274	-0.414766	1.26986	0.473463	-0.289393	-0.777256	-1.65774	-1.36208	-0.546279	-1.62645	-0.12671	0.315189	-0.131119	-0.36249
2	PF14_0475||PF3D7_1449900||conserved Plasmodium protein, unknown function	0.074839	0.076747	0.174343	0.272902	-1.38083	-0.62681	-0.074839	-1.29012	-0.219114	0.034374	-0.069322	0.254825	-0.034374	-0.08575	0.226932	0.045943	-1.45567	-0.703557	-0.249182	-1.56302	0.18474	-0.120124	0.296254	-0.208882
2	PFL1815c||PF3D7_1237500||conserved Plasmodium protein, unknown function	0.17937	0.423948	0.391894	0.150992	-1.2203	-0.34999	-0.150992	-1.17834	0.09099	0.280421	-0.198366	-0.17245	0.040437	-0.040437	0.052027	-0.515357	-1.39967	-0.773938	-0.542886	-1.32933	-0.050553	-0.320858	0.250393	-0.342907
2	PF11_0302||PF3D7_1129100||parasitophorous vacuolar protein 1	1.08357	1.72387	-0.008983	0.471859	-0.838509	0.008983	-0.675199	-1.41792	0.444302	0.077967	-1.12006	-0.077967	0.335221	0.33609	-0.661589	-0.756228	-1.92208	-1.71488	-0.666216	-1.88977	-0.109081	0.258123	0.458466	-0.678261
2	PF10_0079||PF3D7_1008100||conserved Plasmodium protein, unknown function	0.143533	0.315057	0.235706	0.538685	-1.30232	-0.143533	-0.171926	-1.2191	0.050039	0.158549	-0.050039	0.212963	0.56526	-0.060684	-0.253199	-0.466019	-1.44586	-0.45859	-0.407632	-1.75778	0.515221	-0.219233	-0.20316	-0.678982
2	PF11_0203||PF3D7_1119600||peptidase, putative	1.24669	0.957555	0.950791	-0.000197	-0.25204	-0.244388	0.000197	-0.040154	-0.305912	0.329372	0.305912	-0.699351	-0.616303	0.426706	0.372797	-0.753418	-1.49873	-1.20194	-0.950594	-0.039957	-0.310391	0.097334	0.066885	-0.054067
2	PF14_0574||PF3D7_1460100||conserved Plasmodium protein, unknown function	0.866494	1.87435	0.339722	1.22463	-0.391844	-0.339722	-0.699413	-0.54619	0.311699	-0.075323	-1.27259	0.166178	0.105689	-0.122628	-0.819026	0.075323	-1.25834	-2.21407	-1.03913	-1.77082	-0.20601	-0.047305	0.453567	-0.090855
2	MAL13P1.166||PF3D7_1331100||DEAD box helicase, putative	0.329188	1.49168	0.77495	1.27214	-0.830263	-0.329188	-0.56122	-0.702218	-0.010644	0.010644	-0.619494	0.615208	-0.152497	0.195895	-0.559873	0.628379	-1.15945	-1.82087	-1.33617	-1.97435	-0.141853	0.185251	0.059621	0.013171
2	PFI0328c||PF3D7_0906700||leucine-rich repeat protein	0.583391	0.213646	0.14852	-0.14852	-0.544245	-0.164703	0.55911	-0.496481	-0.016019	0.43629	-0.132885	-0.912428	0.045424	0.104338	0.016019	-0.811755	-1.12764	-0.378349	0.41059	-0.347961	0.061443	-0.331952	0.148904	0.100673
2	MAL7P1.118||PF3D7_0722100||PelOta protein homologue, putative	0.440109	0.802906	0.84178	0.56075	-0.903212	-0.506147	-0.534312	-0.440109	0.084866	0.160519	0.236233	-0.011762	-0.081059	-0.098672	0.011762	-0.109936	-1.34332	-1.30905	-1.37609	-1.00086	-0.165925	-0.259191	-0.224471	-0.098174
2	PF11_0358||PF3D7_1134700||DNA-directed RNA polymerase 1, subunit 2, putative	1.60504	1.67378	-0.498649	0.090218	-0.574731	0.511967	-0.090218	-0.947421	0.841914	0.533949	-1.12964	-0.533949	0.766451	0.675151	-0.854083	-0.887039	-2.17977	-1.16181	0.408431	-1.03764	-0.075463	0.141202	0.27556	-0.35309
2	PF11_0162||PF3D7_1115400||cysteine proteinase falcipain 3	0.534058	1.35135	1.35407	1.20146	-0.680659	-0.570601	-0.534058	-0.66075	0.341389	-0.252043	0.345481	0.037942	-0.037942	-0.131128	0.188288	-0.457973	-1.21472	-1.92195	-1.88812	-1.86221	-0.379331	0.120915	-0.157193	-0.495915
2	PFL1525c||PF3D7_1231600||pre-mRNA splicing factor RNA helicase, putative	0.503327	0.411763	0.350777	0.152833	-0.884977	-0.439562	-0.152833	-0.709397	-0.10478	0.283856	0.164299	-0.65151	-0.336719	0.10478	0.125053	-0.728401	-1.3883	-0.851325	-0.50361	-0.86223	-0.231939	-0.179076	-0.039246	-0.076891
2	PFI0250c||PF3D7_0905100||conserved Plasmodium membrane protein, unknown function	0.278593	0.616737	0.622059	0.46079	-0.922249	-0.4202	-0.278593	-0.929134	-0.05833	-0.094196	0.33555	0.003703	-0.094034	0.021427	0.230981	-0.003703	-1.20084	-1.03694	-0.900652	-1.38992	-0.035704	0.115623	-0.104569	-0.007406
2	PF14_0045||PF3D7_1404800||conserved Plasmodium protein, unknown function	0.679326	2.25544	-1.51009	0.882808	-0.185879	0.185879	-1.31273	-1.60893	1.42199	-0.095327	-2.45095	0.363741	1.14671	0.095327	-2.46476	-0.338054	-0.865205	-2.06956	0.197365	-2.49174	-0.275285	0.190654	-0.013812	-0.701795
2	PF14_0616||PF3D7_1464900||ATP-dependent protease la, putative	0.51342	1.05194	0.738798	0.882996	-1.12589	-0.51342	-0.606349	-0.680847	0.290972	0.325883	-0.294905	-0.057485	0.057485	0.081211	-0.147667	-0.262406	-1.63931	-1.56536	-1.34515	-1.56384	-0.233487	-0.244672	0.147238	-0.204921
2	PF14_0076||PF3D7_1407900||plasmepsin I	1.15322	2.32214	-0.491576	0.754803	0.054501	-0.054501	-0.248587	-1.84321	1.83343	0.219212	-0.903741	-0.219212	1.48883	0.529551	-0.974255	-0.665032	-1.09871	-2.37664	0.242989	-2.59802	-0.3446	0.310339	-0.070514	-0.44582
2	PF07_0044||PF3D7_0710700||conserved Plasmodium protein, unknown function	0.979444	0.731534	0.466642	0.811317	-1.14482	-0.466642	-0.94127	-1.02739	0.798882	0.036232	-0.674966	-0.036232	1.20258	0.213497	-0.392326	-0.85162	-2.12427	-1.19818	-1.40791	-1.83871	0.403702	0.177265	0.28264	-0.815388
2	PFL2305w||PF3D7_1248100||conserved Plasmodium protein, unknown function	0.735923	0.813194	0.337815	0.016838	-0.704421	-0.285721	-0.016838	-0.341765	0.301363	0.420262	-0.031309	-0.965097	0.031309	0.422443	-0.123274	-0.846484	-1.44034	-1.09891	-0.354653	-0.358603	-0.270054	0.002181	-0.091965	0.118613
2	PFE1210c||PF3D7_0524300||conserved Plasmodium protein, unknown function	0.491905	0.122754	0.469688	-0.229783	-0.798489	-0.122754	0.307885	-0.599282	-0.010425	0.26702	-0.103006	-1.05566	0.053396	0.070841	0.010425	-1.26325	-1.29039	-0.245508	-0.161803	-0.369499	0.063821	-0.196179	0.113431	-0.207585
2	PFC0800w||PF3D7_0318100||band 7-related protein	1.05726	0.692787	0.762108	0.20006	-1.08076	-0.235065	-0.20006	-0.848552	-0.233279	0.801428	0.233279	-0.836071	-0.310638	0.60915	0.507454	-1.08969	-2.13802	-0.927852	-0.962168	-1.04861	-0.077359	-0.192278	0.274175	-0.253614
2	PF11_0327||PF3D7_1131800||oxysterol-binding protein-related protein 2	0.675224	0.592571	0.388629	0.832956	-0.580524	-0.504599	-0.415715	-0.388629	-0.544655	0.23418	-0.229368	0.692451	-0.10586	0.113497	-0.018821	0.018821	-1.25575	-1.09717	-0.804344	-1.22159	0.438795	-0.120683	0.210547	-0.67363
2	PF11_0111||PF3D7_1110400||asparagine-rich antigen	1.05297	0.791836	0.422888	0.017585	-1.39962	-0.017585	-0.098729	-1.38378	0.224831	0.25003	-0.155047	-0.58999	0.903533	0.08705	-0.08705	-1.26081	-2.45259	-0.809421	-0.521617	-1.40137	0.678702	-0.16298	0.067997	-0.670818
2	PFC0520w||PF3D7_0312300||26S proteasome regulatory subunit S14, putative	0.220545	0.453822	1.12303	0.792999	-0.602747	-0.79163	-0.220545	-0.609041	-0.509359	0.203536	0.466112	-0.131921	-0.896037	0.027981	0.508977	-0.027981	-0.823292	-1.24545	-1.34357	-1.40204	-0.386678	-0.175555	0.042865	0.10394
2	PF13_0322||PF3D7_1360800||falcilysin	0.294984	0.244443	0.393448	-0.03005	-1.09791	-0.348876	0.03005	-1.35955	-0.237691	0.279064	0.75513	-0.420254	-0.470769	0.237691	0.532115	-0.678856	-1.3929	-0.593319	-0.363398	-1.3295	-0.233078	-0.041373	-0.223015	-0.258602
2	PF11_0036||PF3D7_1102400||flavoprotein, putative	0.398483	0.891002	0.348948	0.687755	-0.78807	-0.622759	-0.348948	-0.791245	-0.624714	0.22063	-0.339338	0.179206	-0.541723	0.184034	-0.179206	0.247171	-1.18655	-1.51376	-0.697896	-1.479	0.082991	-0.036596	0.160132	0.067965
2	PFF0560c||PF3D7_0611400||SWI/SNF-related matrix-associated actin-dependent regulator of chromatin	0.450154	0.396766	0.511908	0.018471	-0.999603	-0.321201	-0.018471	-0.858286	0.110443	0.043351	0.024083	-0.650869	-0.20314	-0.024083	0.024177	-0.934754	-1.44976	-0.717967	-0.530379	-0.876757	-0.313583	-0.067434	9.4e-05	-0.283885
2	PFL0740c||PF3D7_1215300||10 kd chaperonin	0.770687	0.032403	0.505736	-1.12582	-0.210729	-0.032403	0.376638	-0.274454	-0.303249	1.42372	0.303249	-1.17829	-0.48537	1.51852	0.677625	-0.945088	-0.981416	-0.064806	-0.129098	0.851362	-0.182121	0.094797	0.374376	0.233206
2	PFC0441c-a||PF3D7_0310600||SAC3/GNAP family-related protein, putative	0.735655	1.03117	0.74681	-0.025087	-1.1478	-0.663347	0.025087	-1.15862	0.357752	0.408056	-0.246455	-0.542384	-0.086511	0.544116	0.086511	-0.615524	-1.88346	-1.69452	-0.721723	-1.13353	-0.444263	0.13606	0.332966	-0.07314
2	PF11_0412||PF3D7_1140100||vacuolar ATP synthase subunit f, putative	0.239517	0.878809	1.29138	0.600359	-1.04545	-0.797947	-0.239517	-0.803624	-0.360932	0.147132	0.214528	-0.409677	-0.669268	0.369818	0.403363	-0.147132	-1.28497	-1.67676	-1.5309	-1.40398	-0.308336	0.222686	0.188835	0.262545
2	PF08_0048||PF3D7_0820000||Snf2-related CBP activator, putative	0.702165	0.759495	0.23706	-0.260008	-0.858604	-0.071047	0.071047	-1.2321	0.137252	0.235021	-0.253028	-1.02689	0.221289	0.157567	-0.137252	-1.29989	-1.56077	-0.830542	-0.166013	-0.972093	0.084037	-0.077454	0.115776	-0.273004
2	PFI1280c||PF3D7_0926100||protein kinase, putative	0.474223	0.915768	0.723946	0.416487	-0.870287	-0.416487	-0.713174	-1.02543	0.247887	0.057131	0.119775	-0.469867	0.363997	-0.057131	-0.218356	-0.679427	-1.34451	-1.33225	-1.43712	-1.44192	0.11611	-0.114262	-0.338131	-0.20956
2	PF10_0149||PF3D7_1015200||cysteinyl-tRNA synthetase, putative	1.01672	0.789382	0.129999	-0.449191	-0.773317	-0.129999	0.394831	-0.8017	-0.015451	0.480615	0.015451	-1.13821	-0.203577	0.356933	0.194998	-1.2159	-1.79003	-0.919381	0.264832	-0.352509	-0.188126	-0.123682	0.179547	-0.077692
2	PF07_0116||PF3D7_0727900||conserved Plasmodium protein, unknown function	0.604236	1.31639	0.479096	0.522217	-1.10429	-0.479096	-0.743455	-0.991827	0.382809	0.188589	-0.307586	-0.188589	0.561455	0.234254	-0.322576	-0.262869	-1.70853	-1.79549	-1.22255	-1.51404	0.178646	0.045665	-0.01499	-0.07428
2	PFI1770w||PF3D7_0936600||Plasmodium exported protein (PHISTb), unknown function	2.82198	1.72639	-0.320755	-0.153261	-0.323762	0.289357	0.153261	-0.926864	2.0805	0.9597	-1.29164	-0.9597	1.77758	1.66301	-1.21195	-1.09208	-3.14574	-1.43704	0.474016	-0.773603	-0.302921	0.703305	0.079686	-0.132377
2	PF10_0122||PF3D7_1012500||phosphoglucomutase, putative	0.463598	0.738692	0.656454	-0.017704	-0.823086	-0.738163	0.017704	-0.856223	-0.123654	0.123654	0.124494	-0.771632	-0.585923	0.206902	0.278119	-0.82126	-1.28668	-1.47686	-0.63875	-0.838519	-0.462269	0.083248	0.153625	-0.049628
2	PFC0805w||PF3D7_0318200||DNA-directed RNA polymerase II, putative	0.961347	0.737308	0.248672	-0.124578	-0.752501	0.124578	-0.170686	-0.756817	0.17167	-0.205602	0.032688	-0.837512	0.34216	0.072933	-0.032688	-1.01945	-1.71385	-0.61273	-0.419358	-0.632239	0.17049	0.278535	-0.065376	-0.181934
2	MAL13P1.52||PF3D7_1310800||conserved Plasmodium protein, unknown function	1.09954	1.21946	0.055844	-0.021664	-0.55008	0.021664	-0.130248	-0.432741	0.456479	0.550997	-0.481896	-0.764391	0.204874	0.563407	-0.204874	-0.509665	-1.64962	-1.1978	-0.186092	-0.411077	-0.251605	0.01241	0.277022	0.254726
2	PFI0455w||PF3D7_0909400||exoribonuclease, putative	0.540091	0.678402	0.261516	-0.106413	-0.691033	0.029645	-0.029645	-1.20372	-0.0282	0.015461	0.151892	-0.799651	-0.015461	0.117844	0.053103	-1.12762	-1.23112	-0.648757	-0.291161	-1.0973	0.012739	0.102383	-0.098789	-0.327964
2	PF11_0280||PF3D7_1126900||small nuclear ribonucleoprotein F, putative	0.49944	0.511537	0.433282	0.122982	-1.00897	-0.504496	-0.122982	-1.00829	0.148308	0.334953	-0.061918	-0.779664	0.061918	0.303682	-0.185419	-0.436488	-1.50841	-1.01603	-0.556264	-1.13128	-0.08639	-0.031271	-0.123501	0.343176
2	PF13_0243||PF3D7_1345800||conserved Plasmodium protein, unknown function	0.687238	0.586974	0.663328	0.009029	-0.86709	-0.603203	-0.009029	-0.868027	-0.04389	0.273695	0.04389	-0.814658	-0.388373	0.230359	0.249911	-0.825794	-1.55433	-1.19018	-0.672357	-0.877056	-0.344483	-0.043336	0.206021	-0.011136
2	PF11_0244||PF3D7_1123300||conserved Plasmodium protein, unknown function	0.208701	0.70479	0.699364	0.690826	-1.19411	-0.653138	-0.208701	-1.05087	-0.200475	0.095906	0.056714	0.133935	-0.197267	-0.056714	0.099804	-0.200804	-1.40281	-1.35793	-0.908065	-1.7417	0.003208	-0.15262	0.04309	-0.334739
2	PF08_0110||PF3D7_0807300||Rab GTPase 18	0.623496	0.875906	1.20599	0.658673	-1.04313	-0.623496	-0.88044	-0.979278	0.031438	-0.031438	0.147029	-0.715392	-0.447973	0.063639	0.052752	-0.431781	-1.66662	-1.4994	-2.08643	-1.63795	-0.479411	0.095077	-0.094277	0.283611
2	PFC0395w||PF3D7_0309500||asparagine synthetase, putative	0.652965	1.078	0.613019	0.302404	-0.67568	-0.485823	-0.302404	-0.949276	0.240804	-0.151994	0.151084	-0.486739	-0.02477	0.02477	0.303085	-0.747692	-1.32864	-1.56383	-0.915423	-1.25168	-0.265574	0.176764	0.152001	-0.260953
2	PF08_0069||PF3D7_0815200||importin beta, putative	1.07353	1.27799	0.913327	0.270751	-1.1151	-0.359662	-0.270751	-1.08735	0.049165	-0.160542	0.177643	-0.474665	0.066607	0.127212	-0.049165	-0.728136	-2.18863	-1.63765	-1.18408	-1.3581	0.017442	0.287754	-0.226808	-0.253471
2	PFD0311w||PF3D7_0406400||cytosolic glyoxalase II	0.619487	1.58896	1.09491	0.499907	-0.746844	-0.499907	-0.946535	-1.09365	0.42382	0.269424	-0.259341	-0.701284	-0.020141	0.359543	0.020141	-0.656	-1.36633	-2.08886	-2.04145	-1.59355	-0.443961	0.090119	0.279482	0.045284
2	PF14_0593||PF3D7_1462300||conserved Plasmodium protein, unknown function	0.38677	0.58923	0.554933	0.019021	-0.827915	-0.367106	-0.019021	-1.00996	0.129751	-0.047689	0.072292	-0.663667	0.137393	-0.153347	0.047689	-0.915619	-1.21469	-0.956336	-0.573954	-1.02899	0.007642	-0.105658	-0.024603	-0.251952
2	PFF0575c||PF3D7_0611800||conserved Plasmodium protein, unknown function	0.829488	1.15831	0.549589	0.840288	-1.2289	-0.595291	-0.549589	-1.26835	0.056763	0.07179	-0.375932	0.074654	0.242723	-0.056763	-0.30811	-0.294172	-2.05839	-1.7536	-1.09918	-2.10864	0.18596	-0.128553	0.067822	-0.368826
2	PFA0410w||PF3D7_0108300||conserved Plasmodium protein, unknown function	0.891565	0.661313	0.071367	0.30628	-1.44591	-0.071367	-0.652434	-1.5149	0.220985	0.27697	-0.256742	-0.187806	0.407867	0.187806	-0.232776	-0.80331	-2.33747	-0.73268	-0.723801	-1.82118	0.186882	-0.089164	0.023966	-0.615504
2	PF10_0141||PF3D7_1014400||MO15-related protein kinase	0.633033	0.555082	0.161198	-0.765262	-0.243008	-0.133504	0.133504	-0.823186	0.491816	0.457004	-0.193759	-1.11336	0.061756	0.638238	-0.061756	-0.820277	-0.876041	-0.688586	-0.027694	-0.057924	-0.43006	0.181234	0.132003	0.293083
2	PF13_0179||PF3D7_1332900||isoleucine-tRNA ligase, putative	0.947515	0.503805	0.240354	-0.483531	-0.820414	-0.104525	0.104525	-1.32167	-0.049527	0.22805	0.049527	-1.06624	-0.290239	0.089359	0.067185	-1.38868	-1.76793	-0.60833	-0.135829	-0.838135	-0.240712	-0.138691	0.017658	-0.322436
2	PF13_0178||PF3D7_1332800||translation initiation factor 6, putative	1.62093	1.70284	0.517752	0.008304	-0.745818	-0.008304	-0.310512	-1.14512	0.327194	0.54931	-0.309449	-1.06294	0.147805	0.4348	-0.147805	-1.26516	-2.36675	-1.71114	-0.828264	-1.15342	-0.179389	-0.11451	0.161644	-0.202218
2	MAL13P1.206||PF3D7_1340900||sodium-dependent phosphate transporter	0.428305	1.56402	0.378553	1.14619	-1.21266	-0.378553	-0.701871	-1.46684	0.420153	-0.456657	-0.558541	0.731712	0.14515	-0.14515	-0.73705	0.539134	-1.64096	-1.94258	-1.08042	-2.61304	-0.275003	0.311507	-0.178509	-0.192578
2	PF08_0081||PF3D7_0813400||conserved Plasmodium protein, unknown function	1.11524	1.1191	0.029523	-0.029523	-1.04513	0.16519	-0.909508	-1.74349	0.763656	0.387705	-0.448412	-0.387705	0.521983	0.587902	-0.463336	-0.542364	-2.16037	-0.953908	-0.939031	-1.71397	-0.241673	0.200197	-0.014924	-0.154659
2	PF14_0662||PF3D7_1469400||nucleoside transporter, putative	1.32076	1.24786	0.489497	-0.156454	-1.08768	-0.177731	0.156454	-1.17045	0.163772	1.16196	0.05718	-0.782794	-0.189899	1.41221	-0.05718	-0.750313	-2.40843	-1.42559	-0.333043	-1.014	-0.353671	0.250248	-0.11436	0.032481
2	PFF0940c||PF3D7_0619400||cell division cycle protein 48 homologue, putative	0.45923	0.381033	0.878543	0.57441	-1.00302	-0.381033	-0.492338	-1.07336	0.022371	-0.092012	0.885469	0.219686	-0.24204	-0.022371	0.713653	-0.168196	-1.46225	-0.762066	-1.37088	-1.64777	-0.264411	0.069641	-0.171816	-0.387882
2	PFD1060w||PF3D7_0422500||u5 small nuclear ribonucleoprotein-specific protein, putative	0.812303	0.749211	0.320113	0.104615	-0.962727	-0.176713	-0.104615	-0.844165	0.039656	0.193973	0.072942	-0.651254	-0.039656	0.157171	-0.052913	-0.821242	-1.77503	-0.925924	-0.424728	-0.94878	-0.079312	-0.036802	-0.125855	-0.169988
2	PFI0475w||PF3D7_0909800||small nuclear ribonucleoprotein (snRNP), putative	0.529891	1.20187	1.00687	0.269056	-0.698094	-0.4338	-0.269056	-0.818028	0.248537	0.41335	-0.045079	-0.925331	-0.092178	0.384914	0.045079	-0.821362	-1.22798	-1.63567	-1.27593	-1.08708	-0.340715	-0.028436	0.090158	0.103969
2	PFF1230c||PF3D7_0625400||conserved Plasmodium protein, unknown function	0.595383	2.03568	-0.443247	1.34966	-0.408015	0.361121	-0.361121	-1.05726	0.596185	-0.461336	-2.17073	0.956237	0.698272	-0.313966	-1.84346	0.313966	-1.0034	-1.67456	0.082126	-2.40692	0.102087	0.14737	0.327267	-0.642271
2	PF14_0431||PF3D7_1445400||protein serine/threonine kinase-1	1.11491	1.03898	-0.153303	0.49492	-0.82013	0.153303	-0.787769	-1.12479	0.535834	0.4135	-0.803469	-0.4135	0.496511	0.422512	-0.602281	-0.866864	-1.93504	-0.885676	-0.634466	-1.61971	-0.039323	0.009012	0.201188	-0.453364
2	PFF0885w||PF3D7_0618300||60S ribosomal protein L27a, putative	0.663446	0.80199	0.193216	-1.09782	-0.988096	-0.193216	0.304628	-2.02283	0.525571	0.790271	0.030294	-1.56561	-0.373823	0.869469	-0.030294	-1.64314	-1.65154	-0.995206	0.111412	-0.92501	-0.899394	0.079198	-0.060588	-0.077527
2	PFA0480w||PF3D7_0109800||phenylalanyl-tRNA synthetase, putative	1.36276	1.51913	0.870661	0.237279	-0.781997	-0.266462	-0.237279	-0.878369	0.24849	0.154026	-0.365802	-1.30595	0.045975	0.218854	-0.045975	-1.58743	-2.14475	-1.78559	-1.10794	-1.11565	-0.202515	0.064828	0.319827	-0.281482
2	PFE0380c||PF3D7_0507700||nuclear pore associated protein (NPL4), putative	0.692646	0.682348	1.04214	0.332465	-0.901039	-0.730449	-0.332465	-0.429691	-0.122382	0.304988	0.73066	-0.427414	-0.470291	0.122382	0.552736	-0.399804	-1.59369	-1.4128	-1.37461	-0.762156	-0.347909	-0.182606	-0.177924	0.02761
2	PFE1155c||PF3D7_0523100||mitochondrial processing peptidase alpha subunit, putative	0.669863	0.597415	0.935186	0.156045	-0.65182	-0.431503	-0.156045	-0.446749	-0.226372	0.282554	0.476864	-0.589001	-0.370653	0.226372	0.598742	-0.630358	-1.32168	-1.02892	-1.09123	-0.602794	-0.144281	-0.056182	0.121878	-0.041357
2	PFE1195w||PF3D7_0524000||karyopherin beta	0.977389	1.46686	0.001206	-0.001206	-0.920631	0.181641	-0.376115	-2.05331	0.265762	0.332229	0.005707	-0.541802	-0.054346	0.479361	-0.005707	-0.899563	-1.89802	-1.28522	-0.377321	-2.0521	-0.320108	0.147132	-0.011414	-0.357761
2	PF14_0589||PF3D7_1461900||valine-tRNA ligase, putative	1.20681	0.591958	0.004699	-0.827413	-0.675606	-0.004699	0.290163	-0.58581	0.377803	0.394321	-0.254278	-1.52076	0.025119	0.440357	-0.025119	-1.5278	-1.88242	-0.596657	0.285464	0.241603	-0.352684	0.046036	0.229159	-0.007033
2	PFF1315w||PF3D7_0627100||ankyrin-repeat protein, putative	0.508529	1.43278	0.809285	1.37757	-0.996124	-0.654558	-0.508529	-1.45952	0.344044	-0.257519	-0.492473	0.641778	0.368945	-0.396675	-0.389514	0.257519	-1.50465	-2.08734	-1.31781	-2.83709	0.024901	-0.139156	0.102959	-0.384259
2	PFI1670c||PF3D7_0934500||vacuolar ATP synthase subunit e, putative	0.455183	1.12846	1.27295	1.06997	-0.889992	-0.632606	-0.455183	-0.806928	0.279936	-0.005835	-0.065085	0.115251	-0.064052	0.005835	0.125938	-0.397312	-1.34518	-1.76106	-1.72814	-1.8769	-0.343988	0.01167	0.191023	-0.512563
2	PF11_0156||PF3D7_1114700||serine/threonine protein kinase	0.376028	0.417581	0.588977	0.319218	-1.2383	-0.640352	-0.319218	-1.23934	0.159082	-0.042002	0.106795	-0.402268	0.033422	-0.018547	0.018547	-0.611613	-1.61433	-1.05793	-0.908195	-1.55856	-0.12566	0.023455	-0.088248	-0.209345
2	PFL0275w||PF3D7_1205500||conserved Plasmodium protein, unknown function	0.533255	2.11306	1.31861	1.58883	-0.722222	-0.533255	-0.846398	-0.901857	0.379467	-0.823189	-0.289444	1.051	0.537551	-0.665153	-0.520037	0.289444	-1.25548	-2.64631	-2.16501	-2.49068	0.158084	0.158036	-0.230593	-0.761557
2	PF14_0567||PF3D7_1459400||conserved Plasmodium protein, unknown function	0.421043	1.5781	1.36721	0.966206	-0.938451	-0.753281	-0.421043	-0.891479	0.686011	-0.132407	-0.089857	0.143383	0.002541	-0.060332	-0.002541	0.171339	-1.35949	-2.33138	-1.78825	-1.85769	-0.68347	0.072075	0.087316	0.027956
2	PF11_0225||PF3D7_1121700||ABC transporter GCN20	1.10446	1.10017	0.278198	0.148272	-1.15986	-0.148272	-0.36301	-1.36233	0.671454	0.580047	-0.577297	-0.778774	0.715313	0.412777	-0.412777	-1.04201	-2.26432	-1.24844	-0.641208	-1.5106	0.043859	-0.16727	0.16452	-0.263236
2	PFF1155w||PF3D7_0624000||hexokinase	0.367578	0.934509	0.332787	0.023781	-0.942152	-0.343001	-0.023781	-1.09248	-0.107532	0.205461	0.36116	-0.556203	-0.522446	0.513703	0.107532	-0.336894	-1.30973	-1.27751	-0.356568	-1.11626	-0.414914	0.308242	-0.253628	0.219309
2	PFD0265w||PF3D7_0405400||pre-mRNA splicing factor, putative	0.721447	0.532863	0.303776	0.060481	-0.764311	-0.222645	-0.060481	-0.745059	0.095095	-0.011066	0.011066	-0.642403	0.08612	0.026167	-0.190452	-1.01925	-1.48576	-0.755508	-0.364257	-0.80554	-0.008975	0.037233	-0.201518	-0.376844
2	PFI0325c||PF3D7_0906600||conserved Plasmodium protein, unknown function	0.849438	1.36044	-0.618529	-0.032392	-0.853502	0.605587	0.032392	-2.12211	1.11561	0.54896	-0.740656	-0.54896	1.08866	0.63206	-0.603292	-0.84857	-1.70294	-0.754851	0.650921	-2.08972	-0.026958	0.0831	0.137364	-0.29961
2	PFB0675w||PF3D7_0214800||conserved Plasmodium membrane protein, unknown function	1.05405	1.60838	0.24994	1.6362	-0.573039	-0.24994	-0.422165	-0.744099	0.195179	-0.195179	-1.16763	1.05164	0.427142	-0.288776	-1.16189	0.741867	-1.62709	-1.85832	-0.672105	-2.3803	0.231963	-0.093597	0.00575	-0.309773
2	PF13_0051||PF3D7_1309500||small nucleolar ribonucleoprotein, putative	0.783504	0.756351	0.585641	-0.140599	-1.17644	-0.844422	0.140599	-1.25205	0.470418	0.122577	-0.488752	-1.05448	0.178428	0.225854	-0.122577	-0.979219	-1.95994	-1.60077	-0.445042	-1.11145	-0.29199	0.103277	0.366175	0.075266
2	PF14_0517||PF3D7_1454400||aminopeptidase P	0.712825	0.281907	-0.14996	-0.406808	-1.08451	0.14996	0.413295	-1.60505	0.20679	0.534929	-0.148592	-0.3668	-0.049979	0.62267	0.049979	-0.870907	-1.79734	-0.131947	0.563255	-1.19824	-0.256769	0.087741	0.198571	-0.504107
2	PFL1680w||PF3D7_1234800||splicing factor 3b, subunit 3, 130kD, putative	1.23319	1.18542	0.266362	-0.019501	-0.846794	-0.272913	0.019501	-0.891715	0.124842	0.209553	-0.018523	-0.970815	-0.112374	0.389104	0.018523	-1.11928	-2.07998	-1.45833	-0.246861	-0.872214	-0.237216	0.179551	0.037046	-0.148465
2	PFE1400c||PF3D7_0528100||beta adaptin protein, putative	0.485831	0.684088	0.316437	0.494039	-1.44711	-0.429385	-0.316437	-1.08661	0.378493	0.009931	-0.380521	0.061326	-0.009931	0.154168	-0.274422	-0.353499	-1.93294	-1.11347	-0.632874	-1.58065	-0.388424	0.144237	0.106099	-0.414825
2	PF13_0278||PF3D7_1353400||Ran-binding protein, putative	0.446855	0.639608	0.285007	-0.062169	-0.841568	-0.262345	0.062169	-0.720487	0.461299	0.165845	-0.386683	-0.864398	0.334205	0.250521	-0.165845	-1.06783	-1.28842	-0.901953	-0.222838	-0.658318	-0.127094	0.084676	0.220838	-0.203431
2	PFD0669c||PF3D7_0414300||conserved Plasmodium protein, unknown function	0.6457	0.217974	0.591426	-0.44117	-0.654486	-0.217974	1.10218	-0.677319	0.118685	0.556493	-0.107716	-1.08956	-0.513351	0.606733	0.107716	-1.04907	-1.30019	-0.435948	0.510757	-0.236149	-0.632036	0.05024	0.215432	0.040492
2	PF14_0716||PF3D7_1474800||proteosome subunit alpha type 1, putative	0.04581	0.149147	0.522185	-0.04581	-1.10374	-0.972053	0.112653	-0.949112	-0.233292	0.233292	0.556523	-0.632151	-0.524666	0.249252	0.768286	-0.264132	-1.14955	-1.1212	-0.409532	-0.903302	-0.291374	0.01596	0.211763	0.368019
2	PF11_0049||PF3D7_1103800||NOT family protein, putative	0.193616	0.409204	0.559298	0.442867	-1.3472	-1.03183	-0.193616	-0.764656	-0.588934	0.000698	0.359171	0.393146	-0.568942	-0.148872	0.102301	-0.000698	-1.54081	-1.44103	-0.752914	-1.20752	0.019992	-0.14957	-0.25687	-0.393844
2	PF07_0024||PF3D7_0705500||inositol phosphatase, putative	0.530538	1.69406	1.24234	1.76831	-0.684119	-0.530538	-0.902997	-0.700549	0.063453	-0.612383	-0.063453	0.452453	0.365341	-0.578488	-0.41915	0.155517	-1.21466	-2.2246	-2.14534	-2.46886	0.301888	0.033895	-0.355697	-0.296936
2	PFF1185w||PF3D7_0624600||SNF2 helicase, putative	0.203375	0.61629	0.524988	0.488403	-1.27715	-0.203375	-0.364438	-1.0176	-0.09352	-0.13094	0.27561	0.246642	0.177008	-0.059069	0.059069	-0.111787	-1.48052	-0.819665	-0.889426	-1.50601	0.270528	0.071871	-0.216541	-0.358429
2	PFL1545c||PF3D7_1232100||chaperonin, cpn60	0.643475	0.130344	1.15229	0.498619	-1.29818	-0.885376	-0.130344	-1.37197	-0.972862	0.598836	0.855	-0.277801	-1.29981	0.277801	1.17108	-0.624178	-1.94165	-1.01572	-1.28263	-1.87059	-0.326952	-0.321035	0.316076	-0.346377
2	PFB0915w||PF3D7_0220000||liver stage antigen 3	0.420104	1.66264	-0.238037	1.19983	-0.429054	0.178752	-0.178752	-0.922712	1.4995	-0.481762	-0.491614	0.966387	1.6055	-0.190969	-0.388178	0.190969	-0.849158	-1.48389	0.059285	-2.12254	0.105998	0.290793	0.103436	-0.775418
2	PFI1650w||PF3D7_0934100||DNA excision-repair helicase, putative	0.539156	0.292495	0.219777	-0.202389	-1.05385	-0.586574	0.202389	-0.750581	0.026116	0.160108	0.157098	-0.791009	-0.223942	0.026603	-0.026116	-0.907526	-1.59301	-0.879069	-0.017388	-0.548192	-0.250058	-0.133505	-0.183214	-0.116517
2	PF14_0170||PF3D7_1417200||NOT family protein, putative	0.516239	0.861891	0.403541	0.410756	-1.19107	-0.403541	-0.492274	-1.21452	0.141958	0.001461	-0.072304	0.014111	0.571909	-0.001461	-0.438996	-0.440339	-1.70731	-1.26543	-0.895815	-1.62528	0.429951	-0.002922	-0.366692	-0.45445
2	PFF0825c||PF3D7_0617000||mitochondrial import receptor subunit tom40, putative	1.21871	1.0557	0.210932	-0.505335	-0.777636	0.002582	-0.002582	-0.743867	0.12438	0.98931	-0.255625	-0.972672	-0.12438	0.871123	0.165471	-0.867902	-1.99635	-1.05312	-0.213514	-0.238532	-0.24876	-0.118187	0.421096	0.10477
2	MAL13P1.275||PF3D7_1355700||protein phosphatase, putative	0.660168	1.10901	0.433835	0.573851	-1.19406	-0.433835	-0.820943	-1.55657	0.178584	0.486103	-0.434732	-0.267283	0.322876	0.369202	-0.178584	-0.426085	-1.85423	-1.54285	-1.25478	-2.13042	0.144292	-0.116901	0.256148	-0.158802
2	PFI1425w||PF3D7_0929000||conserved Plasmodium protein, unknown function	0.752799	0.952447	0.872718	0.420264	-0.639213	-0.527914	-0.420264	-0.525083	0.258526	0.10541	-0.172815	-0.849934	0.227323	0.158543	-0.10541	-0.854745	-1.39201	-1.48036	-1.29298	-0.945347	-0.031203	0.053133	0.067405	-0.004811
2	PFF0760w||PF3D7_0615700||RNA and export factor binding protein, putative	0.425144	0.190983	0.493798	-0.190983	-0.902898	-0.225129	1.29884	-0.529533	-0.005198	0.162065	0.005198	-0.89749	-0.046773	0.198836	0.117872	-1.11861	-1.32804	-0.416112	0.805043	-0.33855	-0.041575	0.036771	0.112674	-0.221115
2	PF13_0341||PF3D7_1364800||DNA-directed RNA polymerase 2, putative	0.931089	1.31502	0.042651	-0.375898	-0.263961	0.15863	-0.042651	-0.956238	0.725647	0.356014	-0.814065	-1.4447	0.515392	0.415363	-0.356014	-1.212	-1.19505	-1.15639	-0.085302	-0.58034	-0.210255	0.059349	0.458051	0.232691
2	PFC0300c||PF3D7_0307200||60S ribosomal protein L7, putative	1.85383	2.0588	0.942921	0.051363	-1.17478	-0.051363	-0.583291	-2.02564	0.343221	0.65972	-0.429624	-1.675	0.086306	0.945196	-0.086306	-2.2522	-3.02861	-2.11017	-1.52621	-2.077	-0.256915	0.285476	0.343318	-0.577207
2	PFF1345w||PF3D7_0627700||transportin	0.270681	0.869265	0.179864	0.038056	-1.21598	-0.278958	-0.038056	-1.12381	0.003232	-0.003232	0.354405	-0.179375	-0.300931	0.509172	0.136364	-0.063157	-1.48666	-1.14822	-0.21792	-1.16186	-0.304163	0.512404	-0.218041	0.116218
2	MAL8P1.48||PF3D7_0822300||splicing factor, putative	0.933816	1.34103	1.17583	0.170489	-0.381711	-0.170489	-0.232373	-0.849169	0.066892	0.288602	-0.066892	-1.42417	-0.120079	0.259785	0.220485	-1.29591	-1.31553	-1.51152	-1.4082	-1.01966	-0.186971	-0.028817	0.287377	0.128269
2	MAL8P1.65||PF3D7_0818700||DNA helicase, putative	0.361523	0.814863	1.24265	0.449476	-1.21536	-0.392217	-0.361523	-0.69185	0.346071	-0.187142	0.118557	-0.588186	0.23029	-0.118557	0.204399	-0.882681	-1.57688	-1.20708	-1.60418	-1.14133	-0.115781	0.068585	0.085842	-0.294495
2	PFL1530w||PF3D7_1231800||asparagine-rich protein, putative	0.469348	1.19176	0.625664	0.103501	-1.05788	-0.103501	-0.296193	-1.52978	0.705319	0.009145	0.074829	-0.519443	0.898081	-0.009145	-0.043087	-0.938696	-1.52723	-1.29526	-0.921857	-1.63328	0.192762	-0.01829	-0.117916	-0.419253
2	PF11_0463||PF3D7_1145100||coatamer gamma subunit, putative	0.5443	1.20395	0.89343	0.809662	-1.22182	-0.5443	-0.669866	-0.883559	0.236033	-0.168309	-0.04055	0.14113	0.04055	-0.089127	0.074193	-0.19334	-1.76612	-1.74825	-1.5633	-1.69322	-0.195483	0.079182	0.114743	-0.33447
2	PF13_0282||PF3D7_1353800||proteasome subunit, putative	0.907621	1.04417	1.24567	0.487216	-0.996532	-0.487216	-0.610596	-1.19594	-0.126573	0.345562	0.733656	-0.260545	-0.177042	0.126573	0.793572	-0.494889	-1.90415	-1.53138	-1.85627	-1.68316	-0.050469	-0.218989	0.059916	-0.234344
2	PFI0925w||PF3D7_0918900||gamma-glutamylcysteine synthetase	0.960802	0.989007	0.055362	0.073036	-0.956263	-0.39244	-0.055362	-1.39018	0.580272	0.262641	-0.305746	-0.686379	0.533056	0.410166	-0.262641	-1.11612	-1.91707	-1.38145	-0.110724	-1.46322	-0.047216	0.147525	0.043105	-0.429741
2	PF14_0541||PF3D7_1456800||V-type H( )-translocating pyrophosphatase, putative	1.46331	2.4792	-0.129607	0.202731	-0.758761	0.129607	-0.968224	-2.21669	1.11411	-0.069298	-1.29476	0.069298	0.525923	0.60808	-1.42549	-0.142405	-2.22207	-2.3496	-0.838617	-2.41942	-0.588184	0.677378	-0.130732	-0.211703
2	PF14_0146||PF3D7_1414800||ribonucleoprotein, putative	1.14655	1.52118	1.33178	0.405768	-0.757325	-0.405768	-0.456005	-0.984325	-0.11041	0.185922	0.223197	-0.994058	-0.232766	0.11041	0.43901	-1.09178	-1.90388	-1.92695	-1.78778	-1.39009	-0.122356	-0.075512	0.215813	-0.097721
2	PFE0445c||PF3D7_0509000||SNAP protein (soluble N-ethylmaleimide-sensitive factor Attachment Protein), putative	0.333572	0.905621	1.58488	0.897259	-1.04878	-0.980675	-0.333572	-0.598263	-0.183372	0.183372	0.618684	-0.37363	-0.483416	0.294239	0.841812	-0.502189	-1.38235	-1.8863	-1.91845	-1.49552	-0.300044	0.110867	0.223128	-0.128559
2	MAL8P1.57||PF3D7_0820500||C-13 antigen	0.676569	1.02158	0.273079	0.652317	-1.20901	-0.273079	-1.38736	-0.909021	0.394093	0.096254	-0.168856	-0.166541	0.161022	0.165729	-0.254288	-0.096254	-1.88557	-1.29466	-1.66044	-1.56134	-0.233071	0.069475	-0.085432	0.070287
2	PF07_0053||PF3D7_0713900||conserved Plasmodium protein, unknown function	0.528377	0.452739	0.378965	-0.059694	-1.03475	0.059694	-0.075458	-1.05451	-0.069595	0.324759	0.069595	-0.73003	0.253312	0.179445	-0.147865	-0.91452	-1.56313	-0.393045	-0.454423	-0.994813	0.322907	-0.145314	-0.21746	-0.18449
2	PFI1515w||PF3D7_0931200||product unspecified	0.335985	0.914181	1.18148	0.509054	-0.957098	-0.456307	-0.335985	-0.759472	0.255673	-0.01807	0.162426	-1.01974	-0.50819	0.339805	0.01807	-0.673816	-1.29308	-1.37049	-1.51746	-1.26853	-0.763863	0.357875	-0.144356	0.345926
2	PF10_0214||PF3D7_1022000||RNA binding protein, putative	0.745122	0.547485	0.370281	-0.06975	-1.40112	-0.424609	0.06975	-1.50147	0.02971	0.359598	-0.02971	-0.603884	0.438041	0.121021	-0.306244	-0.873812	-2.14624	-0.972094	-0.300531	-1.43172	0.408331	-0.238577	-0.276534	-0.269928
2	PF14_0393||PF3D7_1441400||structure specific recognition protein, putative	0.557139	0.070533	0.555031	-0.052503	-1.05055	-0.326014	0.052503	-0.853337	-0.319566	0.464618	0.736084	-0.558461	-0.490973	0.319566	0.858214	-0.550322	-1.60769	-0.396547	-0.502528	-0.800834	-0.171407	-0.145052	0.12213	0.008139
2	PF14_0493||PF3D7_1451800||sortilin, putative	0.368381	0.232469	0.581082	0.315516	-1.05935	-0.250832	-0.232469	-0.638263	-0.360695	0.314225	0.866175	-0.328788	-0.442479	0.61622	0.910525	-0.314225	-1.42773	-0.483301	-0.813551	-0.953779	-0.081784	0.301995	0.04435	0.014563
2	PF08_0020||PF3D7_0826500||ubiquitination-mediated degradation component, putative	0.354909	0.370638	0.830218	0.43685	-1.23481	-0.816909	-0.354909	-0.761958	-0.030894	0.030894	0.651169	-0.155396	-0.337614	0.081405	0.662295	-0.433021	-1.58972	-1.18755	-1.18513	-1.19881	-0.30672	0.050511	0.011126	-0.277625
2	PF08_0120||PF3D7_0804900||GTPase activator, putative	0.418922	1.63396	1.06682	1.75317	-0.766915	-0.538716	-0.827227	-0.418922	0.109465	-0.338538	0.091319	1.03592	-0.091319	-0.143518	-0.151946	0.875279	-1.18584	-2.17268	-1.89405	-2.17209	-0.200784	0.19502	-0.243265	-0.16064
2	PFF1485w||PF3D7_0630600||conserved Plasmodium protein, unknown function	0.358367	0.950143	1.45112	1.02184	-1.0265	-1.13861	-0.831953	-0.358367	-0.177057	-0.033119	0.428789	-0.059274	-0.27327	0.033119	0.592522	0.269751	-1.38487	-2.08875	-2.28307	-1.38021	-0.096213	0.066238	0.163733	0.329025
2	PF10_0272||PF3D7_1027800||60S ribosomal protein L3, putative	1.83082	1.57516	0.878929	-0.038762	-1.18571	0.038762	-0.371222	-2.0202	0.126272	0.281119	-0.249309	-1.40351	-0.126272	0.529608	0.24425	-1.81287	-3.01654	-1.5364	-1.25015	-1.98144	-0.252544	0.248489	0.493559	-0.409354
2	PFL1480w||PF3D7_1230700||protein transport protein Sec13, putative	0.420729	0.27756	0.500692	0.207398	-1.29366	-0.207398	-0.862018	-1.24904	0.445286	-0.287704	0.146733	-0.142811	0.254367	-0.240296	0.142811	-0.257971	-1.71439	-0.484958	-1.36271	-1.45643	-0.190919	0.047408	-0.003922	-0.11516
2	PFD0525w||PF3D7_0410600||conserved Plasmodium protein, unknown function	0.176978	0.40965	-0.176978	0.57041	-1.38773	-0.46023	0.308986	-1.53883	-0.365142	0.158251	-0.277686	0.815797	-0.461869	0.092275	-0.092275	0.504875	-1.5647	-0.86988	0.485964	-2.10924	-0.096727	-0.065976	0.185411	-0.310922
2	PF11_0058-a||PF3D7_1104700||RNA polymerase subunit, putative	0.568001	0.167578	0.325189	-0.616286	-1.05111	-0.161354	0.161354	-1.05714	-0.250581	0.854101	0.250581	-1.17982	-0.60388	0.859717	0.433747	-0.624422	-1.61911	-0.328932	-0.163835	-0.440855	-0.353299	0.005616	0.183166	0.555398
2	PFC0450w||PF3D7_0310800||conserved Plasmodium protein, unknown function	0.612555	1.32221	1.21874	0.708629	-1.28186	-0.68599	-0.612555	-1.47508	-0.370451	-0.268586	-0.051795	0.051795	-0.809631	0.097992	0.058251	0.135297	-1.89441	-2.0082	-1.8313	-2.18371	-0.43918	0.366578	0.110046	0.083502
2	PFD0495c||PF3D7_0410000||conserved Plasmodium protein, unknown function	0.471678	1.59338	-0.284047	1.25975	-1.07385	0.102178	-0.102178	-0.876316	0.551532	-0.467229	-1.86917	1.02638	0.730906	-0.394005	-1.56614	0.394005	-1.54553	-1.4912	0.181869	-2.13606	0.179374	0.073224	0.303034	-0.632375
2	PF11_0396||PF3D7_1138500||protein phosphatase 2c	0.847123	1.3636	1.36438	1.22142	-1.14362	-0.851449	-0.847123	-0.902152	0.111041	-0.111041	0.119286	-0.253487	0.217483	-0.353682	0.391723	-0.673814	-1.99074	-2.21505	-2.2115	-2.12358	0.106442	-0.242641	0.272437	-0.420327
2	PFE0465c||PF3D7_0509400||RNA polymerase I	1.04615	1.02031	-0.395733	-0.146983	-0.787742	0.235732	0.146983	-1.28758	0.570322	0.66454	-0.608232	-0.511675	0.511675	0.707145	-0.556946	-0.717595	-1.8339	-0.784578	0.542716	-1.1406	-0.058647	0.042605	0.051286	-0.20592
2	PFI0810c||PF3D7_0916500||apicoplast Ufd1 precursor	0.374966	0.616366	1.25415	0.358318	-0.898722	-0.971062	-0.358318	-0.421906	-0.46485	0.245701	0.551654	-0.226044	-0.884783	0.226044	0.752891	-0.304082	-1.27369	-1.58743	-1.61246	-0.780224	-0.419933	-0.019657	0.201237	-0.078038
2	PF11_0187||PF3D7_1118100||clathrin assembly protein AP19, putative	0.756715	1.51859	1.52745	0.712384	-0.965603	-0.712384	-1.01388	-1.10771	-0.028845	0.028845	0.091867	-0.611218	-0.261225	0.208732	0.178687	-0.526768	-1.72232	-2.23098	-2.54133	-1.82009	-0.23238	0.179887	0.08682	0.08445
2	PF11_0189||PF3D7_1118300||insulinase, putative	0.838404	1.30566	0.48599	0.363804	-0.825186	-0.363804	-0.543035	-1.10997	0.917365	-0.019166	0.019166	-0.561948	0.738128	0.1328	-0.065491	-0.79905	-1.66359	-1.66947	-1.02903	-1.47377	-0.179237	0.151966	-0.084657	-0.237102
2	PF14_0329||PF3D7_1434800||conserved protein, unknown function	1.02986	-0.08159	0.502176	-0.65973	-0.38246	0.08159	0.994359	-0.249017	-0.674419	1.12077	0.674419	-1.0426	-0.965702	0.892757	1.05846	-1.24506	-1.41232	0.16318	0.492183	0.410713	-0.291283	-0.228014	0.38404	-0.202457
2	PF08_0109||PF3D7_0807800||proteasome subunit alpha type 5, putative	0.410359	0.749629	1.1803	1.08406	-1.3054	-0.879328	-0.410359	-1.0494	-0.148596	-0.00431	0.413355	0.122762	-0.264391	0.00431	0.443411	-0.078579	-1.71576	-1.62896	-1.59065	-2.13346	-0.115795	0.00862	0.030056	-0.201341
2	PFC0745c||PF3D7_0317000||proteasome component C8, putative	0.069393	0.080226	0.802066	0.278385	-1.23045	-0.128137	-0.069393	-1.516	-0.49269	0.210281	1.02062	-0.036243	-0.844126	0.036243	0.800321	-0.070909	-1.29985	-0.208363	-0.871459	-1.79439	-0.351436	-0.174038	-0.220296	-0.034666
2	PF14_0070||PF3D7_1407300||pre-mRNA splicing factor, putative	0.677211	1.21071	0.361573	0.493592	-1.24007	-0.436173	-0.361573	-1.04282	0.407012	-0.07843	-0.151755	0.356775	0.376683	-0.021367	0.021367	-0.213076	-1.91728	-1.64688	-0.723146	-1.53641	-0.030329	0.057063	0.173122	-0.569851
2	PFL2535w||PF3D7_1252700||Plasmodium exported protein (PHISTb), unknown function	0.350824	-0.022363	0.814445	0.02375	-1.43111	-0.77605	0.022363	-0.836529	-9.1e-05	9.1e-05	0.51517	-0.398926	-0.337261	0.142345	0.436542	-0.610109	-1.78193	-0.753687	-0.792082	-0.860279	-0.33717	0.142254	-0.078628	-0.211183
2	PFB0245c||PF3D7_0205500||DNA-directed RNA polymerase II 16 kDa subunit, putative	0.877886	1.33544	0.852772	0.038845	-0.391607	-0.064476	-0.038845	-0.763138	0.436705	0.384496	-0.279123	-0.979821	-0.048788	0.389579	0.048788	-0.88303	-1.26949	-1.39991	-0.891617	-0.801983	-0.485493	0.005083	0.327911	0.096791
2	PFB0715w||PF3D7_0215700||DNA-directed RNA polymerase II second largest subunit, putative	1.15433	1.13312	0.428728	-0.028743	-0.411663	0.028743	-0.071818	-0.498836	0.248541	0.081966	-0.014799	-0.96215	0.014799	0.328301	-0.129553	-0.87706	-1.56599	-1.10438	-0.500546	-0.470093	-0.233742	0.246335	-0.114754	0.08509
2	PFI0755c||PF3D7_0915400||6-phosphofructokinase	0.925115	0.842477	0.036084	-0.16436	-0.826062	0.175331	-0.036084	-1.32634	0.214906	0.055154	-0.037313	-0.767219	0.064171	0.037313	-0.271422	-1.0526	-1.75118	-0.667146	-0.072168	-1.16198	-0.150735	-0.017841	-0.234109	-0.285377
2	PFC0135c||PF3D7_0302900||exportin 1, putative	0.194233	0.474156	0.474816	0.009633	-1.32535	-0.757423	-0.009633	-1.04534	-0.11052	0.11052	0.709425	-0.447424	-0.359931	0.208313	0.649057	-0.621179	-1.51958	-1.23158	-0.484449	-1.05497	-0.249411	0.097793	-0.060368	-0.173755
2	PF08_0034||PF3D7_0823300||histone acetyltransferase GCN5	0.45929	0.391823	0.405667	0.333474	-1.5166	-0.797397	-0.333474	-1.41131	-0.229594	0.3009	0.332635	-0.281741	-0.018083	0.018083	0.359117	-0.5722	-1.97589	-1.18922	-0.739141	-1.74479	0.211511	-0.282817	0.026482	-0.290459
2	PF11_0281||PF3D7_1127000||protein phosphatase, putative	0.102731	0.22193	0.361662	-0.102731	-1.16406	-0.665235	0.112148	-1.10796	0.307943	0.18852	-0.030458	-0.560945	-0.053532	0.030458	0.223976	-0.874407	-1.26679	-0.887165	-0.249514	-1.00523	-0.361475	-0.158062	0.254434	-0.313462
2	PFL2540w||PF3D7_1252800||Plasmodium exported protein (PHISTb), unknown function	0.659504	0.974444	0.297486	0.780562	-1.27841	-0.388186	-0.297486	-1.16465	-0.051884	0.186308	-0.832514	0.059953	0.08143	0.051884	-0.550159	-0.600229	-1.93792	-1.36263	-0.594972	-1.94521	0.133314	-0.134424	0.282355	-0.660182
2	PF13_0324||PF3D7_1361100||Sec24 subunit a	0.555041	1.72228	1.20475	1.57543	-0.852996	-0.555041	-0.767371	-1.01552	0.27096	-0.374686	0.005429	0.434729	-0.005429	-0.290218	-0.01701	0.251935	-1.40804	-2.27732	-1.97212	-2.59095	-0.276389	0.084468	-0.022439	-0.182794
2	PF14_0124||PF3D7_1412500||actin II	1.40062	1.32334	0.344845	-0.36873	-0.703618	0.235324	-0.235324	-0.795654	0.620081	0.61907	-0.474331	-0.933522	0.396143	0.758366	-0.396143	-1.21593	-2.10424	-1.08802	-0.580169	-0.426924	-0.223938	0.139296	0.078188	-0.282405
2	PF14_0096||PF3D7_1409800||RNA binding protein Bruno, putative	0.682818	0.19205	0.669872	-0.046705	-1.38022	-0.797562	0.046705	-0.97986	-0.492866	0.577941	0.537296	-0.815476	-0.52379	0.492866	0.723258	-0.846424	-2.06304	-0.989612	-0.623167	-0.933155	-0.030924	-0.085075	0.185962	-0.030948
2	PFB0210c||PF3D7_0204700||hexose transporter	1.14047	1.70453	0.707857	0.8335	-1.40022	-0.707857	-1.03191	-1.65358	0.139142	0.04056	-0.105869	0.034198	-0.376855	0.525144	-0.098216	-0.034198	-2.54069	-2.41239	-1.73977	-2.48708	-0.515997	0.484584	0.007653	-0.068396
2	PF14_0275||PF3D7_1429600||conserved Plasmodium protein, unknown function	0.530799	0.326345	0.972024	0.418002	-1.47756	-0.653184	-0.326345	-1.39858	-0.012029	-0.248581	0.446615	-0.144227	0.413489	-0.123145	1.3327	0.012029	-2.00836	-0.979529	-1.29837	-1.81658	0.425518	0.125436	0.886087	0.156256
2	MAL8P1.104||PF3D7_0811300||CAF1 family ribonuclease, putative	0.417902	1.43557	0.726621	1.09921	-1.14945	-0.417902	-0.651825	-1.85383	0.301725	-0.327472	-0.085197	0.447273	0.511122	-0.266472	-0.37597	0.085197	-1.56735	-1.85347	-1.37845	-2.95304	0.209397	0.061	-0.290773	-0.362076
2	PFB0240w||PF3D7_0205400||conserved Plasmodium protein, unknown function	0.78558	0.83691	0.663075	-0.066777	-0.213483	-0.143201	0.066777	-0.186227	0.395315	0.000307	-0.000307	-0.954238	0.040387	0.198048	-0.028922	-0.895697	-0.999063	-0.980111	-0.596298	-0.11945	-0.354928	0.197741	-0.028615	0.058541
2	PFF0435w||PF3D7_0608800||ornithine aminotransferase	1.73226	0.928282	1.31491	0.124299	-1.50374	-0.124299	-0.411682	-1.06668	-0.707888	1.25029	0.707888	-0.776617	-0.87596	1.74008	1.21707	-0.924686	-3.236	-1.05258	-1.7266	-1.19097	-0.168072	0.489785	0.509179	-0.148069
2	PFL0695c||PF3D7_1214400||conserved protein, unknown function	0.708695	1.15893	0.991685	-0.072123	-0.945702	-0.590396	0.072123	-1.09798	0.007869	0.002599	-0.002599	-1.06887	-0.218566	0.105411	0.088216	-0.998161	-1.6544	-1.74932	-0.919562	-1.02585	-0.226435	0.102812	0.090815	0.070705
2	PF14_0036||PF3D7_1403900||phosphatase, putative	1.27099	1.03378	0.834023	0.299616	-1.02503	-0.303195	-0.299616	-0.78471	-0.088128	0.577861	0.088128	-0.808408	-0.434665	0.755968	0.15882	-0.658989	-2.29603	-1.33698	-1.13364	-1.08433	-0.346537	0.178107	0.070692	0.149419
2	PFL1245w||PF3D7_1225800||ubiquitin-activating enzyme e1, putative	0.461841	0.646116	0.668281	0.064926	-1.26369	-0.441342	-0.064926	-1.16897	0.003085	-0.003085	0.41653	-0.460755	-0.269867	0.024879	0.315274	-0.542251	-1.72553	-1.08746	-0.733207	-1.2339	-0.272952	0.027964	-0.101256	-0.081496
2	PF10_0077||PF3D7_1007900||eukaryotic translation initiation factor 3 subunit 7, putative	1.41627	1.12661	0.882801	0.215706	-1.258	-0.215706	-0.523254	-1.53953	0.228075	0.311171	-0.142686	-0.989146	-0.11069	0.280674	0.11069	-1.24376	-2.67427	-1.34231	-1.40605	-1.75523	-0.338765	-0.030497	0.253376	-0.25461
2	PF14_0487||PF3D7_1451200||conserved Plasmodium protein, unknown function	0.446954	0.737948	0.531556	0.422038	-1.36203	-0.872779	-0.422038	-1.38835	0.40904	-0.042752	-0.022393	-0.774513	0.455874	0.144586	0.022393	-1.02397	-1.80899	-1.61073	-0.953594	-1.81039	0.046834	0.187338	0.044786	-0.249452
2	PF14_0391||PF3D7_1441200||60S ribosomal protein L1, putative	1.46342	1.79066	0.871156	0.041277	-1.5759	-0.221748	-0.041277	-1.85051	0.219692	0.603938	-0.303335	-1.36183	-0.170271	0.734763	0.170271	-2.0606	-3.03932	-2.01241	-0.912433	-1.89179	-0.389963	0.130825	0.473606	-0.698767
2	PF13_0170||PF3D7_1331700||glutaminyl-tRNA synthetase, putative	1.54419	1.33796	1.02497	0.192261	-1.03949	-0.192261	-0.466187	-1.00147	0.160979	0.171911	-0.043325	-0.967974	-0.026951	0.278046	0.026951	-0.951191	-2.58368	-1.53022	-1.49116	-1.19373	-0.18793	0.106135	0.070276	0.016783
2	PF10_0041||PF3D7_1003800||U5 small nuclear ribonuclear protein, putative	0.811257	0.482977	-0.047153	-0.148363	-0.752273	0.047153	0.179997	-0.623262	0.096753	0.410679	-0.046908	-0.879675	0.046908	0.414747	-0.074619	-0.999366	-1.56353	-0.435824	0.22715	-0.474899	-0.049845	0.004068	-0.027711	-0.119691
2	PF11_0208||PF3D7_1120100||phosphoglycerate mutase, putative	0.99704	0.823668	0.037706	-0.831175	-1.08544	-0.037706	0.542786	-1.53829	0.228567	0.431955	-0.083775	-1.44027	-0.128293	0.456029	0.083775	-1.71022	-2.08248	-0.861374	0.50508	-0.707114	-0.35686	0.024074	0.16755	-0.269946
2	PF13_0354||PF3D7_1367700||alanine--tRNA ligase, putative	0.924134	0.689339	-0.03098	-0.496956	-0.834924	0.164151	0.03098	-0.76689	0.228336	0.278581	-0.12107	-1.18386	0.086866	0.069243	-0.069243	-1.36135	-1.75906	-0.525188	0.06196	-0.269934	-0.14147	-0.209338	0.051827	-0.17749
2	MAL7P1.64||PF3D7_0713400||serpentine receptor, putative	0.573464	1.17373	0.93983	0.615803	-0.831376	-0.573464	-0.811849	-0.806737	-0.000218	0.053776	-0.141906	0.000218	-0.141139	0.124549	-0.18104	0.084452	-1.40484	-1.74719	-1.75168	-1.42254	-0.140921	0.070773	-0.039134	0.084234
2	PF11_0201||PF3D7_1119400||ubiquitin-protein ligase, putative	0.258955	0.597777	0.71648	0.379436	-0.989101	-0.744217	-0.258955	-0.882731	-0.091691	0.010595	0.299934	-0.107976	-0.211421	0.026793	0.305986	-0.010595	-1.24806	-1.34199	-0.975435	-1.26217	-0.11973	0.016198	0.006052	0.097381
2	PF11_0310||PF3D7_1129900||transporter, putative	1.40566	1.03225	0.14777	-0.14777	-1.04174	0.471711	-0.367799	-1.48736	0.344192	0.916804	-0.235664	-0.736245	0.235664	1.06922	-0.291007	-0.718599	-2.4474	-0.560535	-0.515569	-1.33959	-0.108528	0.152413	-0.055343	0.017646
2	PF10_0153||PF3D7_1015600||heat shock protein 60	0.995902	-0.202601	0.459806	-0.457408	-0.966638	0.202601	0.626393	-0.809285	-0.512893	0.983856	0.512893	-0.75059	-0.651784	0.732163	0.793089	-1.19394	-1.96254	0.405202	0.166587	-0.351877	-0.138891	-0.251693	0.280196	-0.443354
2	PF13_0227||PF3D7_1341900||vacuolar ATP synthase subunit d, putative	0.662578	0.687821	1.00359	0.191414	-1.5084	-0.447889	-0.191414	-1.10907	-0.149059	0.217873	0.149059	-0.749424	-0.409566	0.406633	0.258305	-0.751467	-2.17098	-1.13571	-1.195	-1.30048	-0.260507	0.18876	0.109246	-0.002043
2	PF07_0117||PF3D7_0728000||eukaryotic translation initiation factor 2 alpha subunit, putative	1.24535	0.885968	1.09706	0.325013	-1.26215	-0.399416	-0.325013	-1.33204	0.0025	-0.0025	0.097045	-1.00877	-0.47234	0.162571	0.260839	-1.22158	-2.5075	-1.28538	-1.42207	-1.65706	-0.47484	0.165071	0.163794	-0.212808
2	PFE0605c||PF3D7_0512200||glutathione synthetase	1.3879	0.775066	0.551415	-0.215305	-0.654735	-0.15477	0.15477	-0.315974	-0.159083	0.944932	0.159083	-1.00763	-0.351353	0.784017	0.376076	-0.80313	-2.04264	-0.929836	-0.396645	-0.100669	-0.19227	-0.160915	0.216993	0.204504
2	PF13_0285||PF3D7_1354200||inositol-polyphosphate 5-phosphatase, putative	0.250811	1.15981	1.20104	1.48798	-0.947476	-0.694337	-0.250811	-0.569365	-0.546115	0.058871	-0.049865	0.840152	-0.468332	0.033245	-0.033245	1.03002	-1.19829	-1.85415	-1.45185	-2.05734	0.077783	-0.025626	0.01662	0.189871
2	PFF1055c||PF3D7_0621900||conserved Plasmodium protein, unknown function	0.893175	0.952723	0.952902	0.230428	-0.905422	-0.36681	-0.230428	-1.21792	-0.006567	0.055693	0.076171	-0.867288	-0.199482	0.006567	0.129079	-0.900015	-1.7986	-1.31953	-1.18333	-1.44834	-0.192915	-0.049126	0.052908	-0.032727
2	PF10_0057||PF3D7_1005500||regulator of nonsense transcripts, putative	0.380644	0.069375	0.352747	0.027537	-1.46018	-0.86239	-0.027537	-0.989123	-0.344665	0.51773	0.551236	-0.221099	-0.607184	0.221099	0.492235	-0.66409	-1.84082	-0.931765	-0.380284	-1.01666	-0.262519	-0.296631	-0.059001	-0.442991
2	PFE0185c||PF3D7_0503800||60S ribosomal protein L31, putative	1.76922	1.9174	1.54939	0.010909	-1.02443	-0.010909	-0.107904	-1.43674	0.137572	0.756514	-0.137572	-1.52371	-0.179329	0.998225	0.490393	-1.79578	-2.79365	-1.92831	-1.6573	-1.44764	-0.316901	0.241711	0.627965	-0.27207
2	PFB0450w||PF3D7_0210000||secretory complex protein 61 gamma subunit	0.79675	0.961221	0.999007	0.647534	-1.61392	-0.647534	-0.749077	-1.36244	-0.352516	0.3489	0.498005	-0.593396	-0.425987	0.415117	0.592162	-0.3489	-2.41067	-1.60875	-1.74808	-2.00997	-0.073471	0.066217	0.094157	0.244496
2	PF14_0633||PF3D7_1466400||transcription factor with AP2 domain(s), putative	1.00752	1.63573	0.351133	0.682153	-0.80448	-0.351133	-0.940124	-1.35179	0.292698	-0.098187	-0.585797	0.098187	0.219112	0.116128	-0.557076	-0.258392	-1.812	-1.98686	-1.29126	-2.03395	-0.073586	0.214315	0.028721	-0.356579
2	MAL13P1.274||PF3D7_1355500||serine/threonine protein phosphatase	0.213537	0.232523	0.111671	-0.787828	-1.03536	-0.111671	0.291875	-1.2668	0.017589	0.134983	-0.017589	-1.24677	-0.352118	0.173995	0.101725	-1.35847	-1.2489	-0.344194	0.180204	-0.478969	-0.369707	0.039012	0.119314	-0.111702
2	PF14_0520||PF3D7_1454700||6-phosphogluconate dehydrogenase, decarboxylating, putative	0.527605	0.498554	0.691623	0.053727	-1.16958	-0.6379	-0.053727	-1.07624	0.069648	-0.06943	0.70989	-0.541355	-0.435655	0.06943	0.778238	-0.61094	-1.69718	-1.13645	-0.74535	-1.12996	-0.505303	0.13886	0.068348	-0.069585
2	PF08_0036||PF3D7_0822600||Pfsec23	0.399701	1.26403	0.759041	1.01767	-0.85343	-0.72289	-0.399701	-0.957306	0.488586	-0.42412	-0.00021	0.345739	-0.004587	-0.139686	0.00021	0.307102	-1.25313	-1.98692	-1.15874	-1.97497	-0.493173	0.284434	0.00042	-0.038637
2	PFL1270w||PF3D7_1226300||cof-like hydrolase, had-superfamily, subfamily iib	0.793872	1.72374	1.21518	1.36726	-1.09763	-1.02992	-0.793872	-1.59593	0.049461	-0.115209	0.317684	0.099714	-0.051461	-0.049461	0.326885	-0.218768	-1.8915	-2.75366	-2.00906	-2.96319	-0.100922	0.065748	0.009201	-0.318482
2	PFD0250c||PF3D7_0405100||Sec24 subunit b	0.56118	1.15811	1.15188	1.26482	-1.01005	-1.17221	-0.906869	-0.56118	-0.282025	-0.177008	0.401911	0.447882	-0.339162	-0.153389	0.217164	0.153389	-1.57123	-2.33032	-2.05875	-1.826	-0.057137	0.023619	-0.184747	-0.294493
2	PFF0420c||PF3D7_0608500||proteasome subunit alpha type 2, putative	0.053101	-0.053101	0.701696	-0.266008	-0.952699	0.319088	0.978036	-1.27291	-0.393464	0.439078	0.75915	-0.529581	-1.01839	0.393464	0.888359	-0.581041	-1.0058	0.372189	0.27634	-1.0069	-0.624924	-0.045614	0.129209	-0.05146
2	PFF1015w||PF3D7_0621000||conserved Plasmodium protein, unknown function	0.552822	0.444472	0.494884	-0.084357	-1.56322	-0.80791	0.084357	-1.01368	-0.191271	0.800791	0.191271	-0.692384	-0.291292	0.310113	0.309619	-0.927288	-2.11605	-1.25238	-0.410527	-0.929321	-0.100021	-0.490678	0.118348	-0.234904
2	PF14_0691||PF3D7_1472300||conserved Plasmodium membrane protein, unknown function	0.528978	1.88546	1.49654	1.88732	-0.82683	-0.638358	-0.528978	-1.00294	-0.251551	-0.049022	0.030581	1.14571	-0.22827	-0.030581	0.067965	1.13426	-1.35581	-2.52381	-2.02552	-2.89027	0.023281	0.018441	0.037384	-0.011457
2	PF14_0240||PF3D7_1426000||60S ribosomal protein L21e, putative	1.54252	2.02085	1.16275	0.067567	-1.47951	-0.067567	-0.297752	-2.03276	0.127387	0.566416	-0.285448	-1.99877	-0.127387	0.853242	0.185534	-2.43083	-3.02202	-2.08841	-1.4605	-2.10032	-0.254774	0.286826	0.470982	-0.432057
2	PFF0590c||PF3D7_0612100||homologue of human HSPC025	0.621101	0.415229	0.436022	-0.369186	-0.999696	-0.203957	0.203957	-1.3442	0.125985	0.275631	0.230862	-0.825194	-0.295705	0.381238	-0.125985	-0.717749	-1.6208	-0.619186	-0.232065	-0.975016	-0.42169	0.105607	-0.356847	0.107445
2	PF10_0298||PF3D7_1030500||26S proteasome regulatory subunit, putative	0.225782	0.745277	1.32614	0.550436	-1.44492	-0.796361	-0.225782	-1.38619	-0.196117	0.320331	0.632975	-0.058209	-0.416451	0.058209	0.893665	-0.189479	-1.6707	-1.54164	-1.55192	-1.93663	-0.220334	-0.262122	0.26069	-0.13127
2	PFI0290c||PF3D7_0905900||beta subunit of coatomer complex, putative	0.722541	0.967141	1.15204	0.645533	-0.962674	-0.645533	-1.16854	-0.919789	-0.016946	0.052623	0.016946	-0.449459	-0.031336	0.27778	0.124058	-0.147772	-1.68521	-1.61267	-2.32058	-1.56532	-0.01439	0.225157	0.107112	0.301687
2	PF14_0417||PF3D7_1443900||heat shock protein 90, putative	0.648475	-0.17067	0.760276	0.27093	-0.849865	-0.468298	0.17067	-0.687073	-0.660433	0.55694	0.934541	-0.502248	-0.741365	0.502248	1.16384	-0.61674	-1.49834	-0.297628	-0.589606	-0.958003	-0.080932	-0.054692	0.229303	-0.114492
2	PF10_0093||PF3D7_1009600||protein phosphatase, putative	1.09887	0.082792	0.39586	-0.18327	-1.04175	-0.240766	0.468217	-0.082792	-0.273714	0.670521	0.273714	-0.967406	-0.713658	0.519297	0.503245	-0.814803	-2.14062	-0.323558	0.072357	0.100478	-0.439944	-0.151224	0.229531	0.152603
2	PFE0585c||PF3D7_0511800||myo-inositol 1-phosphate synthase, putative	0.478129	0.555406	1.12385	0.514697	-1.19899	-0.478129	-0.532954	-0.877318	-0.050145	0.050145	1.03493	-0.348312	-0.288397	0.326595	0.894093	-0.316344	-1.67712	-1.03354	-1.65681	-1.39202	-0.238252	0.27645	-0.140842	0.031968
2	MAL7P1.122||PF3D7_0722400||GTP binding protein, putative	0.66674	0.751633	0.318471	-0.318471	-0.895569	-0.487702	0.327602	-0.875437	0.18121	0.163717	-0.10643	-0.616979	-0.329203	0.143251	0.10643	-0.924662	-1.56231	-1.23934	0.009131	-0.556966	-0.510413	-0.020466	0.21286	-0.307683
2	PF13_0102||PF3D7_1318800||secretory complex protein 63	0.25446	1.12536	0.573148	0.923599	-1.1224	-0.710628	-0.25446	-1.24152	0.233062	-0.382336	-0.123606	0.748518	0.1813	-0.225287	-0.116528	0.116528	-1.37686	-1.83599	-0.827608	-2.16512	-0.051762	0.157049	0.007078	-0.63199
2	PFL0590c||PF3D7_1211900||non-SERCA-type Ca2 -transporting P-ATPase	0.853285	1.53944	0.38863	1.27552	-1.1474	-0.529743	-0.38863	-1.15726	-0.039709	0.039709	-0.471527	0.714135	-0.128179	0.114438	-0.348869	0.434369	-2.00069	-2.06919	-0.77726	-2.43278	-0.08847	0.074729	0.122658	-0.279766
2	PF07_0115||PF3D7_0727800||cation transporting ATPase, putative	0.497037	0.330815	0.845842	0.248271	-1.54507	-0.785751	-0.248271	-1.12476	-0.320516	0.468768	0.638258	-0.510031	-0.402607	0.320516	0.483285	-0.618436	-2.04211	-1.11657	-1.09411	-1.37303	-0.082091	-0.148252	-0.154973	-0.108405
2	MAL13P1.234||PF3D7_1346400||conserved Plasmodium protein, unknown function	0.219839	0.686832	0.879294	1.09787	-1.13099	-0.631461	-0.219839	-0.361683	-0.270635	-0.214983	0.454376	0.234161	0.043651	-0.213102	0.009235	-0.009235	-1.35083	-1.31829	-1.09913	-1.45955	0.314286	0.001881	-0.445141	-0.243396
2	PF11_0142||PF3D7_1113400||ubiquitin domain containing protein	0.672741	1.25472	1.04527	0.830954	-1.94212	-1.06851	-0.672741	-1.90656	0.123327	-0.125003	-0.080526	0.3462	-0.220602	0.080526	0.322102	-0.107205	-2.61486	-2.32323	-1.71801	-2.73751	-0.343929	0.205529	0.402628	-0.453405
2	PF11_0048||PF3D7_1103700||casein kinase II beta chain	0.720273	0.996885	1.16508	0.099272	-1.21899	-0.705671	-0.099272	-1.16808	-0.114708	0.114708	0.568285	-0.606396	-0.47575	0.180865	0.566227	-0.648955	-1.93927	-1.70256	-1.26435	-1.26735	-0.361042	0.066157	-0.002058	-0.042559
2	MAL13P1.171||PF3D7_1333300||transmembrane protein Tmp21 homologue, putative	0.590939	0.809273	1.29642	0.503786	-0.961966	-0.575919	-0.503786	-0.636262	-0.007752	0.007752	0.036125	-0.506733	-0.500518	0.042447	0.257039	-0.733066	-1.5529	-1.38519	-1.8002	-1.14005	-0.492766	0.034695	0.220914	-0.226333
2	PF11_0069||PF3D7_1105800||conserved Plasmodium protein, unknown function	0.069491	0.482604	0.580131	0.5547	-2.19472	-1.29109	-0.069491	-2.04158	-0.256898	0.023408	0.020316	0.092174	-0.372001	-0.020316	0.233522	-0.246031	-2.26421	-1.77369	-0.649622	-2.59628	-0.115103	-0.043724	0.213206	-0.338205
2	PF14_0494||PF3D7_1451900||small subunit rRNA processing factor, putative	1.20318	1.11363	0.522697	0.399445	-1.08003	-0.399445	-0.718699	-1.05422	0.368204	0.254131	-0.254131	-0.494698	0.38763	0.368112	-0.350591	-0.934688	-2.28321	-1.51308	-1.2414	-1.45367	0.019426	0.113981	-0.09646	-0.43999
2	PF13_0153||PF3D7_1328500||alpha/beta-hydrolase, putative	0.480052	1.41285	0.398331	1.23943	-1.60672	-0.602148	-0.398331	-1.16676	0.160768	-0.16381	-0.41644	1.27516	0.810119	-0.160768	-0.268585	0.564993	-2.08677	-2.015	-0.796662	-2.40619	0.649351	0.003042	0.147855	-0.710164
2	PF10_0068||PF3D7_1006800||RNA binding protein, putative	1.43319	1.25506	1.08906	0.380998	-1.38905	-0.380998	-0.61358	-1.79112	0.165201	0.133823	-0.182979	-1.05026	-0.066798	0.308846	0.066798	-1.57449	-2.82224	-1.63605	-1.70264	-2.17212	-0.231999	0.175023	0.249777	-0.52423
2	PFA0310c||PF3D7_0106300||calcium-transporting ATPase	0.559534	0.938775	1.12566	0.915824	-1.33677	-0.670256	-0.559534	-0.9124	0.058167	-0.19885	0.702756	0.194719	-0.372518	-0.058167	0.496601	-0.183819	-1.89631	-1.60903	-1.68519	-1.82822	-0.430685	0.140683	-0.206155	-0.378538
2	PFE1230c||PF3D7_0524700||mitochondrial import receptor subunit tom22, putative	1.07503	1.04305	0.810938	-0.014787	-0.863701	-0.158458	0.014787	-0.410078	-0.056632	0.667296	0.056632	-0.897097	-0.45147	0.596957	0.242899	-0.810213	-1.93873	-1.20151	-0.796151	-0.395291	-0.394838	-0.070339	0.186267	0.086884
2	PFF0525w||PF3D7_0610700||conserved Plasmodium protein, unknown function	1.20691	1.11976	0.196638	0.057174	-1.21322	-0.376304	-0.057174	-1.58379	0.801003	0.425994	-0.313481	-0.758838	0.313481	0.553262	-0.344777	-0.630408	-2.42013	-1.49607	-0.253812	-1.64097	-0.487522	0.127268	-0.031296	0.12843
2	MAL13P1.135||PF3D7_1324700||SNARE protein, putative	0.156822	1.3223	1.29188	1.11607	-0.98407	-0.924854	-0.156822	-0.754625	0.063639	-0.163261	-0.108184	0.347481	-0.372976	-0.063639	0.10248	0.290243	-1.14089	-2.24716	-1.4487	-1.8707	-0.436615	0.099622	0.210664	-0.057238
2	PFF1095w||PF3D7_0622800||leucyl tRNA synthase	0.576567	0.348981	0.156112	-0.348528	-1.40061	-0.152562	0.152562	-1.25091	0.034639	0.330245	0.062949	-1.03426	-0.070242	0.14572	-0.034639	-1.32236	-1.97717	-0.501543	-0.00355	-0.902382	-0.104881	-0.184525	-0.097588	-0.288101
2	MAL13P1.172||PF3D7_1333400||conserved protein, unknown function	1.20976	1.34563	0.904323	0.224513	-0.792305	-0.224513	-0.428981	-0.678158	0.593174	0.367298	-0.194477	-0.978014	0.194477	0.548559	-0.280743	-1.03276	-2.00206	-1.57014	-1.3333	-0.902671	-0.398697	0.181261	-0.086266	-0.054741
2	PFB0645c||PF3D7_0214200||mitochondrial ribosomal protein L13 precursor, putative	0.300749	1.02567	1.43314	0.772583	-0.959347	-1.37379	-0.300749	-0.467777	-0.277357	0.088442	0.806699	-0.161395	-0.626503	0.077083	1.01691	-0.077083	-1.2601	-2.39947	-1.73389	-1.24036	-0.349146	-0.011359	0.210213	0.084312
2	MAL7P1.12||PF3D7_0703500||erythrocyte membrane-associated antigen	0.998141	0.853458	0.357734	-0.015004	-1.46582	0.015004	-0.467056	-1.78708	0.078731	0.137669	-0.078731	-0.611314	0.231634	0.137476	-0.129697	-0.859826	-2.46396	-0.838454	-0.82479	-1.77208	0.152903	-0.000193	-0.050966	-0.248512
2	PFD0950w||PF3D7_0419600||ran binding protein 1, putative	0.720811	0.565413	0.945996	0.533376	-1.33091	-0.8707	-0.533376	-1.36179	-0.019645	0.019645	0.154349	-0.71345	-0.286554	0.128246	0.252854	-1.09099	-2.05172	-1.43611	-1.47937	-1.89517	-0.266909	0.108601	0.098505	-0.377545
2	MAL13P1.148||PF3D7_1329100||myosin C	0.263067	0.676782	0.446545	0.71013	-1.74105	-0.567401	-0.263067	-1.50853	-0.732438	-0.005175	0.005175	0.086103	-0.728701	0.110287	-0.067449	0.009787	-2.00412	-1.24418	-0.709612	-2.21866	0.003737	0.115462	-0.072624	-0.076316
2	PF08_0060||PF3D7_0817300||asparagine-rich antigen	1.16388	0.598847	0.398949	-0.020413	-1.89313	0.020413	-0.171495	-1.18395	-0.527072	1.24869	0.407409	-0.401422	-0.615985	1.43982	0.401422	-0.515918	-3.05701	-0.578434	-0.570444	-1.16353	-0.088913	0.191122	-0.005987	-0.114496
2	PFD1055w||PF3D7_0422400||40S ribosomal protein S19, putative	1.48792	2.19949	1.29669	0.316367	-1.26159	-0.316367	-0.609417	-2.21319	0.180168	0.398146	-0.264029	-1.3327	-0.055546	0.419676	0.055546	-1.85587	-2.74952	-2.51586	-1.90611	-2.52956	-0.235714	0.02153	0.319575	-0.523169
2	PF14_0455||PF3D7_1447900||multidrug resistance protein 2 (heavy metal transport family)	0.931015	0.389536	0.489901	0.002004	-1.28642	-0.129922	-0.002004	-1.13928	-0.609656	0.901038	0.31996	-0.397593	-0.689889	0.556782	0.502696	-0.31996	-2.21743	-0.519458	-0.491905	-1.14128	-0.080233	-0.344256	0.182736	0.077633
2	MAL13P1.190||PF3D7_1338100||proteasome regulatory subunit, putative	0.481976	0.500043	1.20356	0.79536	-1.5183	-0.913339	-0.481976	-0.814829	-0.569514	0.023682	0.793137	-0.023682	-0.832865	0.156332	0.78617	-0.050799	-2.00028	-1.41338	-1.68554	-1.61019	-0.263351	0.13265	-0.006967	-0.027117
2	PF13_0268||PF3D7_1351400||60S ribosomal protein L17, putative	1.3504	1.2734	0.714801	-0.712059	-1.51139	-0.086513	0.086513	-2.32227	0.150279	0.466156	-0.150279	-1.84088	-0.319213	0.723936	0.226353	-2.16872	-2.86179	-1.35991	-0.628288	-1.61021	-0.469492	0.25778	0.376632	-0.327845
2	MAL5_ITS1||PF3D7_0531700||product unspecified	1.48311	0.583427	0.973768	-0.467943	-2.11727	-0.197182	0.197182	-2.33935	-0.556279	0.361682	1.33352	-0.361682	-0.80616	0.657227	1.0106	-0.442842	-3.60038	-0.780609	-0.776586	-1.87141	-0.249881	0.295545	-0.322914	-0.08116
2	PF08_0137||PF3D7_0801000||Plasmodium exported protein (PHISTc), unknown function	1.91088	1.50927	-0.297856	0.094456	-0.27673	0.906305	-0.094456	-1.08657	1.2047	0.811904	-1.05299	-0.85524	1.08846	0.949524	-0.811904	-1.05174	-2.18761	-0.602966	0.2034	-1.18102	-0.116247	0.13762	0.24109	-0.196499
2	PFB0640c||PF3D7_0214100||sec31p	0.564626	0.868898	0.53521	0.722847	-1.52369	-0.53521	-0.93116	-1.42909	0.439052	-0.317272	0.156257	0.353157	0.479261	-0.356553	-0.270241	-0.156257	-2.08832	-1.40411	-1.46637	-2.15194	0.040209	-0.039281	-0.426498	-0.509414
2	MAL7P1.38||PF3D7_0711500||regulator of chromosome condensation, putative	0.902772	0.195915	0.557486	-0.195915	-1.19136	-0.301864	0.723619	-0.845879	-0.115678	0.291853	0.047685	-0.832969	-0.047685	0.052825	0.125701	-1.15287	-2.09414	-0.497779	0.166133	-0.649964	0.067993	-0.239028	0.078016	-0.319902
2	PF07_0073||PF3D7_0717700||seryl-tRNA synthetase, putative	0.650003	0.94246	0.969656	0.275483	-1.26072	-0.580936	-0.275483	-1.0608	-0.021621	0.021621	0.139521	-0.757537	-0.257288	0.100231	0.349517	-0.899634	-1.91072	-1.5234	-1.24514	-1.33628	-0.235667	0.07861	0.209996	-0.142097
2	PF14_0253-a||PF3D7_1427400||conserved Plasmodium membrane protein, unknown function	0.130679	0.535737	1.2174	0.270332	-1.53633	-1.11522	-0.130679	-1.07865	-0.583664	0.160619	0.570825	-0.373003	-1.24893	0.12819	0.239302	-0.12819	-1.66701	-1.65095	-1.34808	-1.34898	-0.665266	-0.032429	-0.331523	0.244813
2	PF13_0349||PF3D7_1366500||nucleoside diphosphate kinase	0.053764	-0.075221	1.63489	0.445231	-0.053764	-1.11753	0.457237	-0.509173	-0.529355	-0.103238	1.80349	-0.048706	-0.528905	0.048706	1.82943	0.099938	-0.107528	-1.04231	-1.17765	-0.954404	0.00045	0.151944	0.025939	0.148644
2	PF13_0133||PF3D7_1323500||plasmepsin V	0.213853	0.86101	0.643126	-0.037992	-1.87235	-0.878398	0.037992	-1.71382	0.071475	-0.004813	0.124572	-0.733837	-0.243827	0.426636	0.004813	-0.781203	-2.0862	-1.73941	-0.605134	-1.67583	-0.315302	0.431449	-0.119759	-0.047366
2	PF11_0106||PF3D7_1109900||apicoplast ribosomal protein L36e precursor, putative	0.411249	0.168741	-0.031249	-0.588796	-2.13673	0.031249	0.230589	-2.70467	0.458434	0.626748	-0.14512	-1.11088	0.14512	0.839946	-0.246764	-1.68735	-2.54798	-0.137492	0.261838	-2.11587	-0.313314	0.213198	-0.101644	-0.576473
2	PFI0823w||PF3D7_0916800||conserved Plasmodium protein, unknown function	0.809781	0.627001	1.40107	0.074546	-1.82101	-0.725334	-0.074546	-1.21437	-0.488299	0.811617	0.475364	-0.475364	-0.718787	0.836428	1.02979	-0.648761	-2.63079	-1.35234	-1.47562	-1.28892	-0.230488	0.024811	0.554422	-0.173397
2	PFL0930w||PF3D7_1219100||clathrin heavy chain, putative	0.443123	0.527203	0.76658	0.213955	-1.42538	-0.778069	-0.213955	-1.16061	-0.009229	0.009229	0.800681	-0.108273	-0.046765	0.020039	0.602397	-0.308823	-1.8685	-1.30527	-0.980535	-1.37457	-0.037536	0.01081	-0.198284	-0.20055
2	PFA0590w||PF3D7_0112200||ABC transporter, (CT family), putative	0.930255	0.126463	1.04817	-0.131405	-0.820908	-0.126463	0.617715	-0.455925	-0.782804	0.559019	1.13614	-0.67542	-0.944211	0.548029	0.90742	-0.548029	-1.75116	-0.252926	-0.430456	-0.32452	-0.161407	-0.01099	-0.228718	0.127391
2	PFC0200w-a||PF3D7_0304400||60S ribosomal protein L44, putative	1.21432	0.657659	0.836266	-0.095606	-2.13562	-0.630654	0.095606	-2.42413	-0.088563	0.568655	-0.327722	-1.58993	0.088563	0.773311	0.20686	-2.20194	-3.34994	-1.28831	-0.74066	-2.32852	0.177126	0.204656	0.534582	-0.612018
2	PFC0350c||PF3D7_0308200||TCP-1/cpn60 chaperonin family, putative	1.58131	0.836934	0.389367	0.032536	-0.787605	-0.032536	-0.099311	-0.991611	0.351349	0.200334	-0.005433	-0.289261	0.005433	0.437077	-0.067568	-0.512038	-2.36892	-0.86947	-0.488678	-1.02415	-0.345916	0.236743	-0.062135	-0.222777
2	MAL13P1.266||PF3D7_1352400||conserved Plasmodium protein, unknown function	-0.033026	0.431719	0.885515	0.033026	-1.6426	-0.657921	0.359183	-0.996476	-0.106199	0.174937	0.537218	-0.191176	-0.304487	0.106199	0.517162	-0.401959	-1.60957	-1.08964	-0.526332	-1.0295	-0.198288	-0.068738	-0.020056	-0.210783
2	MAL7P1.67||PF3D7_0713700||conserved Plasmodium protein, unknown function	0.517873	1.432	1.90599	1.09425	-1.37082	-0.517873	-0.695319	-0.543188	-0.259551	0.20353	0.514323	-0.20353	-0.656762	0.3992	0.541961	-0.234188	-1.88869	-1.94987	-2.60131	-1.63743	-0.397211	0.19567	0.027638	-0.030658
2	PFD0985w||PF3D7_0420300||transcription factor with AP2 domain(s), putative	0.737861	2.11179	0.140313	2.06668	-0.844181	-0.140313	-0.342528	-0.337674	0.399616	-0.399616	-0.741261	2.14154	0.806619	-0.425091	-0.874676	1.31051	-1.58204	-2.2521	-0.482841	-2.40435	0.407003	-0.025475	-0.133415	-0.83103
2	MAL8P1.202||PF3D7_0805600||apicoplast phosphatidic acid phosphatase, putative	0.691141	3.26851	1.41306	2.21737	-1.00469	-0.691141	-0.963827	-1.7617	0.483885	-0.245684	-0.667431	1.48134	0.109808	-0.109808	-0.619212	1.0106	-1.69583	-3.95965	-2.37689	-3.97907	-0.374077	0.135876	0.048219	-0.470742
2	PF10_0075||PF3D7_1007700||transcription factor with AP2 domain(s), putative	1.08815	0.301029	0.792842	0.133683	-1.44538	-0.133683	-0.189743	-0.911631	-0.93823	0.534562	0.536948	-0.534562	-0.882305	0.549889	0.537936	-0.693231	-2.53353	-0.434712	-0.982585	-1.04531	0.055925	0.015327	0.000988	-0.158669
2	MAL13P1.56||PF3D7_1311800||M1-family alanyl aminopeptidase	1.32066	1.73418	0.140765	0.043504	-1.54106	-0.043504	-0.210278	-2.35275	0.211345	0.474157	-0.211345	-0.579545	0.450591	0.450829	-0.235856	-0.986336	-2.86171	-1.77769	-0.351043	-2.39626	0.239246	-0.023328	-0.024511	-0.406791
2	PF14_0529||PF3D7_1455500||gamma-adaptin, putative	0.599699	0.750169	0.945685	0.49869	-1.41541	-0.977309	-0.49869	-0.860896	-0.206725	0.213826	0.542861	-0.305681	-0.562193	0.26749	0.206725	-0.36832	-2.0151	-1.72748	-1.44437	-1.35959	-0.355468	0.053664	-0.336136	-0.062639
2	PFL2345c||PF3D7_1248900||tat-binding protein homolog	0.024339	0.532988	1.02294	0.668115	-1.59279	-1.06588	-0.024339	-1.15956	-0.254053	0.048267	0.471105	0.14253	-0.449878	-0.114412	0.484982	-0.048267	-1.61713	-1.59887	-1.04727	-1.82767	-0.195825	-0.162679	0.013877	-0.190797
2	PF11_0121||PF3D7_1111500||acylphosphatase, putative	0.334373	0.651478	1.19871	0.318079	-1.37966	-1.28051	-0.318079	-1.01732	-0.251508	0.348256	0.811115	-0.472227	-0.530531	0.251508	0.951284	-0.456127	-1.71403	-1.93199	-1.51679	-1.3354	-0.279023	-0.096748	0.140169	0.0161
2	PFI0490c||PF3D7_0910100||Ran-binding protein, putative	0.286495	0.536157	0.865582	0.128819	-1.73054	-0.840946	-0.128819	-1.34483	-0.057653	0.057653	0.50813	-0.306741	-0.494024	0.227259	0.437652	-0.712785	-2.01703	-1.3771	-0.994401	-1.47365	-0.436371	0.169606	-0.070478	-0.406044
2	PFC0295c||PF3D7_0307100||40S ribosomal protein S12, putative	1.65118	2.15617	1.34093	0.077546	-1.51386	-0.166724	-0.077546	-1.91419	0.193657	0.708051	-0.167339	-1.48228	-0.290927	0.921811	0.167339	-1.55451	-3.16504	-2.3229	-1.41848	-1.99173	-0.484584	0.21376	0.334678	-0.072234
2	MAL13P1.270||PF3D7_1353900||proteasome subunit, putative	0.421011	0.889304	1.43901	0.425973	-1.46059	-1.08894	-0.421011	-1.55212	-0.205547	0.205547	0.409339	-0.64665	-0.59831	0.3054	0.813965	-0.877925	-1.8816	-1.97824	-1.86002	-1.9781	-0.392763	0.099853	0.404626	-0.231275
2	PFI1370c||PF3D7_0927900||phosphatidylserine decarboxylase	0.119344	1.51496	1.73236	1.81334	-0.864901	-0.720162	-0.715197	-0.119344	-0.308506	-0.414015	0.322025	0.69939	-0.361026	-0.168182	0.168182	0.869474	-0.984245	-2.23512	-2.44756	-1.93269	-0.05252	0.245833	-0.153843	0.170084
2	PFI1545c||PF3D7_0931800||proteasome precursor, putative	0.063041	0.165913	1.02075	0.435295	-1.57487	-1.27635	-0.063041	-1.40718	-0.386761	-0.011349	0.772509	0.05051	-0.612324	0.008588	0.870266	-0.008588	-1.63791	-1.44227	-1.08379	-1.84247	-0.225563	0.019937	0.097757	-0.059098
2	PF14_0632||PF3D7_1466300||26S proteasome regulatory subunit, putative	0.392095	0.931061	1.22874	1.10438	-1.719	-1.02626	-0.392095	-1.05928	-0.364472	-0.043359	0.59372	0.151481	-0.556335	-0.065837	0.522852	0.043359	-2.1111	-1.95732	-1.62084	-2.16366	-0.191863	-0.022478	-0.070868	-0.108122
2	PF11_0188||PF3D7_1118200||heat shock protein 90, putative	1.57412	0.153996	0.151722	-0.532666	-1.78517	-0.125736	0.125736	-1.45436	-0.151963	1.13718	0.151963	-1.07913	-0.368541	0.773577	0.479969	-1.04574	-3.35928	-0.279732	-0.025986	-0.921695	-0.216578	-0.363603	0.328006	0.033392
2	PF11_0364||PF3D7_1135400||conserved Plasmodium protein, unknown function	0.40038	0.895954	1.27482	0.441343	-1.21508	-0.40038	-0.807383	-1.62142	0.409469	0.026577	0.15542	-0.88394	-0.026577	-0.102324	0.27466	-1.04043	-1.61546	-1.29633	-2.0822	-2.06276	-0.436046	-0.128901	0.11924	-0.156493
2	PF07_0112||PF3D7_0727400||proteasome subunit alpha type 5, putative	0.712091	1.02378	1.84607	0.64738	-1.56121	-1.01282	-0.64738	-1.06809	-0.1902	0.1902	0.82716	-0.271108	-0.826085	0.203673	0.915145	-0.519308	-2.2733	-2.0366	-2.49345	-1.71547	-0.635885	0.013473	0.087985	-0.2482
2	PF14_0025||PF3D7_1402300||proteosome subunit, putative	0.68441	0.955352	1.58587	0.95687	-1.77695	-1.21123	-0.68441	-1.33201	-0.412791	0.210977	0.672406	-0.114282	-0.541146	0.09985	0.767238	-0.09985	-2.46136	-2.16658	-2.27028	-2.28888	-0.128355	-0.111127	0.094832	0.014432
2	PFF0630c-a||PF3D7_0613000||conserved Plasmodium protein, unknown function	0.000173	-0.000173	1.74254	0.258443	-1.76784	-1.53876	0.036716	-1.1033	-0.718323	0.202953	1.51284	-0.093484	-1.12573	0.093484	1.68064	-0.238589	-1.76802	-1.53859	-1.70582	-1.36174	-0.407407	-0.109469	0.167801	-0.145105
2	PF11_0098||PF3D7_1108600||endoplasmic reticulum-resident calcium binding protein	0.10202	0.422698	1.65469	1.04011	-2.17788	-1.5675	-0.10202	-0.940787	-0.590849	0.138606	1.60004	0.105786	-0.977001	-0.105786	1.51729	-0.231881	-2.2799	-1.99019	-1.75671	-1.98089	-0.386152	-0.244392	-0.082749	-0.337667
2	PFE0410w||PF3D7_0508300||triose phosphate transporter	0.917783	0.695873	1.32061	0.05547	-2.1352	-0.737484	-0.05547	-1.48819	-0.470567	0.522268	0.757405	-0.617042	-1.07034	0.849307	0.470567	-0.549113	-3.05298	-1.43336	-1.37608	-1.54365	-0.599772	0.327039	-0.286838	0.067929
2	PF11_0301||PF3D7_1129000||spermidine synthase	1.19788	1.17662	1.06946	0.142996	-1.8267	-0.545276	-0.142996	-1.75762	-0.2956	0.381995	0.309057	-1.03284	-0.606761	0.514033	0.2956	-1.03981	-3.02458	-1.7219	-1.21245	-1.90062	-0.311161	0.132038	-0.013457	-0.006966
2	PFI1105w||PF3D7_0922500||phosphoglycerate kinase	1.92901	1.76607	1.37811	0.053469	-1.30702	-0.240111	-0.053469	-1.28215	0.060798	0.198794	-0.060798	-1.80117	-0.559876	0.274564	0.250495	-2.1058	-3.23603	-2.00618	-1.43158	-1.33562	-0.620674	0.07577	0.311293	-0.30463
2	PF05TR005||PF3D7_0531500||product unspecified	1.89706	2.48162	2.016	0.687184	-2.83952	-0.687184	-0.887347	-3.37634	0.051985	-0.051985	0.279364	-0.86227	-0.182279	0.603034	0.415004	-1.49346	-4.73657	-3.1688	-2.90335	-4.06352	-0.234264	0.655019	0.13564	-0.631186
2	PF11_0433||PF3D7_1142100||conserved Plasmodium protein, unknown function	0.230204	0.811603	0.592947	0.423105	-0.58827	-0.230204	-0.427163	-1.19501	0.582111	-0.02519	0.089285	-0.165514	0.770627	-0.08953	0.02519	-0.623807	-0.818474	-1.04181	-1.02011	-1.61811	0.188516	-0.06434	-0.064095	-0.458293
2	PF14_0140||PF3D7_1414200||conserved Plasmodium protein, unknown function	-0.162708	0.83893	0.216568	0.832023	-0.438672	0.075637	-0.075637	-0.690277	0.305912	0.09256	-0.530592	0.71982	0.407214	-0.09256	-0.437282	-0.270807	-0.275964	-0.763293	-0.292205	-1.5223	0.101302	-0.18512	0.09331	-0.990627
2	PF14_0477||PF3D7_1450100||signal recognition particle SRP54	-0.005884	0.488941	0.05636	0.017896	-0.924988	0.005884	-0.529269	-0.812169	0.746926	-0.126187	-0.191822	-0.316389	0.75588	0.31751	0.126187	-0.219205	-0.919104	-0.483057	-0.585629	-0.830065	0.008954	0.443697	0.318009	0.097184
2	PF14_0046||PF3D7_1404900||conserved Plasmodium protein, unknown function	0.003091	1.37699	0.303455	0.94867	-0.940345	-0.506788	-0.003091	-1.09019	1.16583	-0.008594	-0.080652	1.28992	1.51652	-0.037733	-0.017149	0.008594	-0.943436	-1.88377	-0.306546	-2.03886	0.350684	-0.029139	0.063503	-1.28133
2	PF10_0279||PF3D7_1028500||conserved Plasmodium protein, unknown function	0.558342	0.716301	0.377724	0.224577	-1.03005	-0.224577	-0.757895	-0.640315	0.515187	0.385964	-0.318669	-0.306158	0.690208	0.051062	-0.051062	-0.791974	-1.58839	-0.940878	-1.13562	-0.864892	0.175021	-0.334902	0.267607	-0.485816
2	PF14_0350||PF3D7_1437000||N-acetyltransferase, putative	-0.069927	0.853289	0.66091	1.28404	-0.70334	-0.609555	0.069927	-0.635354	0.023602	-0.221425	-0.023602	0.434095	0.113753	-0.100268	-0.120786	0.275494	-0.633413	-1.46284	-0.590983	-1.91939	0.090151	0.121157	-0.097184	-0.158601
2	PF13_0265||PF3D7_1350500||conserved Plasmodium protein, unknown function	0.383598	1.10477	1.15105	1.09038	-0.644297	-0.403949	-0.383598	-0.488455	-0.115906	0.035751	-0.103562	-0.025741	0.094979	0.019506	0.034406	-0.019506	-1.0279	-1.50872	-1.53465	-1.57884	0.210885	-0.016245	0.137968	0.006235
2	PFI0510c||PF3D7_0910500||conserved Plasmodium protein, unknown function	0.152864	1.25003	0.876726	1.50993	-0.617313	-0.285737	-0.152864	-0.427349	0.056493	-0.139812	-0.056493	0.604236	0.21591	-0.168543	-0.240789	0.21681	-0.770177	-1.53577	-1.02959	-1.93728	0.159417	-0.028731	-0.184296	-0.387426
2	PFB0760w||PF3D7_0216600||MtN3-like protein	0.406141	1.74653	1.07864	1.80307	-0.605076	-0.406141	-0.899167	-0.648377	0.416592	-0.291048	-0.513122	0.672352	0.036874	-0.036874	-0.464521	0.48163	-1.01122	-2.15267	-1.97781	-2.45144	-0.379718	0.254174	0.048601	-0.190722
2	PFL0885w||PF3D7_1218300||adaptor protein subunit, putative	0.36594	1.36222	1.18414	1.47826	-0.481101	-0.459062	-0.73379	-0.36594	0.185542	-0.433032	-0.399732	0.847405	0.100191	-0.100191	-0.305329	0.794352	-0.847041	-1.82128	-1.91793	-1.8442	-0.085351	0.332841	0.094403	-0.053053
2	PF11_0179||PF3D7_1117300||conserved Plasmodium protein, unknown function	0.604385	1.85396	1.58253	1.53381	-0.658991	-0.916906	-1.65936	-0.604385	0.325216	-0.332971	-0.067214	0.1092	-0.291183	0.0823	-0.078999	0.067214	-1.26338	-2.77086	-3.24189	-2.13819	-0.616399	0.415271	-0.011785	-0.041986
2	PF11_0362||PF3D7_1135100||protein phosphatase, putative	0.238978	1.96576	1.46568	1.97574	-0.41102	-0.396294	-0.238978	-0.371657	0.394474	-0.458371	-0.461194	0.55769	0.273868	-0.273868	-0.489793	0.496807	-0.649998	-2.36206	-1.70466	-2.3474	-0.120606	0.184503	-0.028599	-0.060883
2	PFL0270c||PF3D7_1205400||conserved Plasmodium protein, unknown function	0.323694	1.17295	1.13447	1.22885	-1.22275	-0.868006	-0.323694	-0.946836	-0.398699	0.070477	0.061298	0.166457	-0.418058	-0.172011	0.038443	-0.038443	-1.54645	-2.04096	-1.45817	-2.17568	-0.019359	-0.242488	-0.022855	-0.2049
2	PF11_0329||PF3D7_1132000||ubiquitin-like protein, putative	0.47074	1.253	1.39022	1.38736	-0.962985	-0.990197	-0.853204	-0.47074	-0.384119	-0.094782	0.113389	0.426815	-0.305625	-0.321348	0.097525	0.094782	-1.43372	-2.24319	-2.24342	-1.8581	0.078494	-0.226566	-0.015864	-0.332033
2	PFB0805c||PF3D7_0217300||clathrin coat assembly protein, putative	0.18167	1.84107	1.74692	2.07876	-0.563481	-0.862747	-0.18167	-0.258692	0.059738	-0.036175	-0.266025	0.91379	-0.060122	0.036175	-0.350478	1.07326	-0.745151	-2.70382	-1.92859	-2.33745	-0.11986	0.07235	-0.084453	0.159473
2	PF14_0421||PF3D7_1444300||apicoplast 1-acyl-sn-glycerol-3-phosphate acyltransferase, putative	0.147751	1.44203	1.54087	1.65221	-0.938953	-0.147751	-0.317968	-0.637099	-0.504693	-0.291347	0.248235	0.472481	-0.82967	-0.164275	0.308045	0.164275	-1.0867	-1.58978	-1.85884	-2.28931	-0.324977	0.127072	0.05981	-0.308206
2	PF11_0465||PF3D7_1145400||dynamin-like protein	0.260123	1.39009	1.78576	1.76788	-1.08576	-0.350193	-0.260123	-0.431722	-0.294479	-0.418814	0.337624	0.74919	-0.600322	-0.324304	0.294479	0.630195	-1.34588	-1.74028	-2.04588	-2.1996	-0.305843	0.09451	-0.043145	-0.118995
2	PFL0190w||PF3D7_1203900||ubiquitin conjugating enzyme E2, putative	0.755901	2.17848	1.33446	1.88177	-2.06923	-1.23773	-0.755901	-1.95674	0.044961	-0.226523	-0.404199	0.861691	0.043998	-0.188553	-0.043998	0.439109	-2.82513	-3.41621	-2.09036	-3.83852	-0.000963	0.03797	0.360201	-0.422582
2	PFI0180w||PF3D7_0903700||alpha tubulin 1	0.558692	1.72446	2.04813	1.42053	-1.84124	-2.07511	-0.558692	-0.797958	-0.435107	-0.551275	1.0528	0.236966	-0.72739	-0.175083	1.12659	0.175083	-2.39993	-3.79957	-2.60683	-2.21848	-0.292283	0.376192	0.073793	-0.061883
2	PF14_0016||PF3D7_1401400||early transcribed membrane protein 14.1	0.262109	2.02181	-1.81044	0.120064	0.31096	-0.120064	-2.45227	-2.78653	2.63646	-0.213338	-2.05806	0.213338	2.14324	0.89316	-2.08395	-0.384035	0.048851	-2.14188	-0.641835	-2.90659	-0.493219	1.1065	-0.02589	-0.597373
2	PF13_0275||PF3D7_1353100||Plasmodium exported protein, unknown function	0.854171	2.62922	-1.19598	-0.39364	0.39364	0.482334	-1.35406	-2.50027	1.98579	0.492852	-2.14272	-0.492852	2.11501	1.01602	-1.58257	-1.23189	-0.460531	-2.14689	-0.158076	-2.10663	0.129212	0.523164	0.560147	-0.739037
2	PF10_0047||PF3D7_1004400||RNA binding protein, putative	0.75546	-0.121263	0.203814	-0.505187	0.581243	0.121263	-0.146824	-0.275556	-0.692242	0.767415	0.314668	-0.717136	-0.303645	0.303645	0.525195	-1.0691	-0.174217	0.242526	-0.350638	0.229631	0.388597	-0.46377	0.210527	-0.351968
2	PFL1170w||PF3D7_1224300||polyadenylate-binding protein, putative	0.63838	0.575482	-0.110704	-0.176564	0.110704	0.294906	-0.537188	-0.666751	0.866611	0.079285	-0.282663	-0.079285	0.891947	0.25708	-0.247609	-1.07263	-0.527676	-0.280576	-0.426484	-0.490187	0.025336	0.177795	0.035054	-0.993344
2	PFC0245c||PF3D7_0305500||conserved Plasmodium protein, unknown function	0.115593	0.336546	-0.115593	0.616385	-0.214195	0.125779	-0.129595	-0.901536	-0.310146	0.02668	-0.263798	0.68538	0.004132	-0.004132	-0.430635	0.32451	-0.329788	-0.210767	-0.014002	-1.51792	0.314278	-0.030812	-0.166837	-0.36087
2	MAL13P1.213||PF3D7_1342700||transcription activator, putative	0.341996	1.00163	0.495483	-0.152126	0.029784	-0.029784	-0.270169	-0.049389	0.641871	0.464863	-0.29318	-0.948951	0.255145	0.601228	-0.255145	-0.682462	-0.312212	-1.03141	-0.765652	0.102737	-0.386726	0.136365	0.038035	0.266489
2	MAL13P1.79||PF3D7_1315400||conserved Plasmodium protein, unknown function	0.237613	0.603853	0.080834	0.420816	-0.080834	-0.086347	-0.206571	-0.577817	0.060956	0.10552	-0.060956	0.084533	-0.166712	0.172302	-0.156372	-0.150253	-0.318447	-0.6902	-0.287405	-0.998633	-0.227668	0.066782	-0.095416	-0.234786
2	MAL13P1.282||PF3D7_1357600||conserved Plasmodium protein, unknown function	0.114776	0.309833	0.015437	0.088396	-0.149537	-0.015437	-0.275075	-0.647122	0.032181	-0.226337	0.193162	0.004482	0.093254	-0.040024	-0.004482	-0.082061	-0.264313	-0.32527	-0.290512	-0.735518	0.061073	0.186313	-0.197644	-0.086543
2	PFD1170c||PF3D7_0424600||Plasmodium exported protein (PHISTb), unknown function	0.221899	1.63438	-1.14846	0.641903	0.079475	-0.079475	-0.65483	-1.01095	1.79453	-0.094288	-1.11997	0.602221	1.57447	-0.028922	-1.15786	0.028922	-0.142424	-1.71385	0.493634	-1.65285	-0.220063	0.065366	-0.037885	-0.573299
2	PF13_0347||PF3D7_1366000||conserved Plasmodium protein, unknown function	0.449541	0.63864	-0.030795	0.284188	-0.074847	-0.543363	0.030795	-0.562491	0.039793	0.435231	-0.526156	-0.039793	-0.184535	0.453525	-0.313478	0.169554	-0.524388	-1.182	0.06159	-0.846679	-0.224328	0.018294	0.212678	0.209347
2	PF10_0018||PF3D7_1001400||alpha/beta hydrolase, putative	0.491997	1.79997	-1.87043	-0.334332	0.334332	0.605891	-1.17388	-1.27459	2.37129	0.406348	-2.22034	-0.406348	2.17848	0.502892	-2.231	-0.923036	-0.157665	-1.19408	0.696546	-0.940263	-0.192806	0.096544	-0.010659	-0.516688
2	MAL13P1.413||PF3D7_1370300||membrane associated histidine-rich protein	0.834664	3.00575	-2.00185	-0.699033	0.386042	0.954101	-0.386042	-1.76674	2.96742	0.396175	-2.61579	-0.396175	2.45329	0.98728	-2.46295	-0.602109	-0.448622	-2.05164	1.61581	-1.06771	-0.514136	0.591105	0.152843	-0.205934
2	PF13_0273||PF3D7_1352700||P-loop containing nucleoside triphospahte hydrolase, putative	0.25862	0.290488	-0.161844	-0.655517	-0.102603	0.102603	0.109039	-0.902182	0.167913	0.434582	0.020788	-0.835456	-0.020788	0.2862	-0.029886	-1.02118	-0.361223	-0.187885	0.270883	-0.246665	-0.188701	-0.148382	-0.050674	-0.185721
2	PFB0953w||PF3D7_0221200||Plasmodium exported protein (hyp15), unknown function	1.25314	-0.521012	-0.016483	-1.15088	0.016483	0.046138	0.546113	-1.0884	-0.347848	1.96113	0.347848	-1.01328	-0.495377	2.09583	0.798893	-0.50587	-1.23665	0.56715	0.562596	0.062482	-0.147529	0.134704	0.451045	0.507415
2	PFB0900c||PF3D7_0219700||Plasmodium exported protein (PHISTc), unknown function	-0.516475	0.238805	-1.83028	0.085205	-0.085205	0.320287	0.477178	-0.823887	1.93053	-0.076241	-1.43027	0.367133	1.81227	-0.086565	-1.14194	0.076241	0.43127	0.081482	2.30746	-0.909092	-0.118264	-0.010324	0.288326	-0.290892
2	PFF0515c||PF3D7_0610500||conserved protein, unknown function	0.356436	0.039736	0.005317	-1.04767	-0.063165	-0.005317	0.462453	-0.587348	0.43285	0.162811	-0.384503	-1.53331	-0.135032	0.353661	0.135032	-1.06502	-0.419601	-0.045053	0.457136	0.460323	-0.567882	0.19085	0.519535	0.468299
2	PF14_0542||PF3D7_1456900||conserved protein, unknown function	0.098547	0.716269	0.232626	-0.253846	-0.38081	-0.098547	0.638537	-1.03268	0.745328	0.227346	-0.399563	-0.865309	0.32808	0.24831	-0.227346	-0.991527	-0.479357	-0.814816	0.405911	-0.778832	-0.417248	0.020964	0.172217	-0.126218
2	PF11_0275||PF3D7_1126500||conserved Plasmodium protein, unknown function	1.13493	0.916826	-0.146183	-0.281259	-0.138301	0.29333	0.138301	-0.89948	0.390788	0.563546	-0.259755	-0.686314	0.434186	0.259755	-0.260406	-0.839544	-1.27323	-0.623496	0.284484	-0.618221	0.043398	-0.303791	-0.000651	-0.15323
2	PF11_0291||PF3D7_1128000||conserved Plasmodium protein, unknown function	0.01091	0.707273	0.12416	0.386635	-0.7495	-0.211511	-0.01091	-1.33301	0.210019	0.100332	-0.306739	-0.010183	0.208541	0.010183	-0.169525	-0.404815	-0.76041	-0.918784	-0.13507	-1.71965	-0.001478	-0.090149	0.137214	-0.394632
2	PFL0310c||PF3D7_1206200||eukaryotic translation initiation factor 3 subunit 8, putative	0.893792	0.077522	0.038888	-0.663923	-0.30864	0.215628	-0.038888	-1.15991	0.21295	0.321979	-0.140237	-1.28473	0.13638	-0.090497	0.090497	-1.56768	-1.20243	0.138106	-0.077776	-0.495984	-0.07657	-0.412476	0.230734	-0.282952
2	MAL7P1.228||PF3D7_0831700||heat shock protein 70, putative	1.03324	0.747516	-0.983501	-1.01551	-0.046615	0.454142	0.046615	-1.48638	1.84332	0.526567	-0.811438	-1.2315	1.74346	0.6614	-0.526567	-1.39576	-1.07986	-0.293374	1.03012	-0.470866	-0.099858	0.134833	0.284871	-0.164263
2	PF08_0096||PF3D7_0810600||RNA helicase, putative	1.05946	0.224839	-0.278254	-0.698162	0.088578	0.34771	-0.088578	-0.382304	0.328678	0.422419	-0.065659	-1.16913	-0.105005	0.28166	0.065659	-1.36247	-0.970881	0.122871	0.189676	0.315858	-0.433683	-0.140759	0.131318	-0.193348
2	PFL1485w||PF3D7_1230800||conserved Plasmodium protein, unknown function	0.714077	0.562642	0.150149	-0.337572	-0.588298	0.048429	-0.048429	-0.996152	0.445304	0.495781	-0.495012	-1.09534	0.673461	0.117427	-0.117427	-1.48735	-1.30238	-0.514213	-0.198578	-0.65858	0.228157	-0.378354	0.377585	-0.392005
2	PF14_0117||PF3D7_1411900||conserved Plasmodium protein, unknown function	1.10161	1.56526	-0.55887	-0.129749	-0.366406	0.170249	0.129749	-1.63281	1.24815	0.561923	-1.02516	-0.561923	0.968525	0.79536	-0.990601	-0.706612	-1.46802	-1.39501	0.688619	-1.50306	-0.279627	0.233437	0.034557	-0.144689
2	MAL8P1.23||PF3D7_0826100||ubiquitin-protein ligase 1, putative	0.657998	0.728787	0.157586	0.03932	-0.728486	-0.125501	-0.03932	-1.15973	0.09121	0.257719	-0.09121	-0.542021	0.368024	0.213673	-0.350492	-0.868787	-1.38648	-0.854288	-0.196906	-1.19905	0.276814	-0.044046	-0.259282	-0.326766
2	PF13_0222||PF3D7_1340600||phosphatase, putative	0.797735	0.494256	-0.193419	-0.707686	-0.35627	0.193419	0.509363	-1.24766	0.249157	0.35404	-0.181065	-1.02657	0.138458	0.558584	-0.138458	-1.00513	-1.154	-0.300837	0.702782	-0.539972	-0.110699	0.204544	0.042607	0.021433
2	PF14_0104||PF3D7_1410600||eukaryotic translation initiation factor 2 gamma subunit, putative	0.45487	0.256339	-0.18172	-0.745911	-0.546649	0.18172	0.297714	-1.15776	0.424142	0.319051	0.024306	-0.867962	-0.040435	0.406046	-0.024306	-1.22873	-1.00152	-0.074619	0.479434	-0.411854	-0.464577	0.086995	-0.048612	-0.360771
2	PFL2355w||PF3D7_1249100||conserved Plasmodium protein, unknown function	1.11704	0.480042	0.13919	-0.649181	-0.234687	-0.029232	0.029232	-0.334326	0.072172	0.393952	-0.127269	-1.39069	0.032379	0.481815	-0.032379	-1.19929	-1.35172	-0.509274	-0.109958	0.314855	-0.039793	0.087863	0.09489	0.191399
2	PF11_0341||PF3D7_1133100||conserved membrane protein, unknown function	0.623625	0.63715	-0.528257	-0.656176	-0.31546	0.40576	0.31546	-0.471498	0.621973	0.553303	-0.668156	-0.89466	0.550794	0.586499	-0.550794	-0.880009	-0.939085	-0.23139	0.843717	0.184678	-0.071179	0.033196	0.117362	0.014651
2	PFE1335c||PF3D7_0526800||conserved Plasmodium protein, unknown function	0.343998	0.008583	-0.008583	-0.888008	-0.509899	0.063999	0.650058	-0.938374	0.252921	0.208668	-0.154689	-1.22903	0.211136	0.154689	-0.199751	-1.45551	-0.853897	0.055416	0.658641	-0.050366	-0.041785	-0.053979	-0.045062	-0.226475
2	PFF0105w||PF3D7_0602200||MYND finger protein, putative	0.668924	0.134967	0.23513	-0.619149	-0.157553	-0.134967	0.188886	-0.506707	0.180626	0.533235	-0.215473	-0.986007	-0.083276	0.592183	0.083276	-1.071	-0.826477	-0.269934	-0.046244	0.112442	-0.263902	0.058948	0.298749	-0.084995
2	PF14_0442||PF3D7_1446500||conserved Plasmodium protein, unknown function	0.56997	0.462553	0.18132	-0.251345	-0.571337	0.052831	-0.052831	-1.22104	0.08754	-0.069252	0.031472	-0.697042	0.107401	-0.009165	0.009165	-0.903917	-1.14131	-0.409722	-0.234151	-0.969696	0.019861	0.060087	-0.022307	-0.206875
2	PF14_0707||PF3D7_1473900||conserved Plasmodium protein, unknown function	1.17727	1.16982	-0.076119	0.366367	-0.750083	0.076119	-0.964757	-0.597241	1.24483	0.819961	-0.884352	-0.400178	1.30631	0.400178	-0.648347	-0.834147	-1.92736	-1.09371	-0.888638	-0.963608	0.061476	-0.419783	0.236005	-0.433969
2	PFC0130c||PF3D7_0302800||conserved Plasmodium protein, unknown function	0.472602	1.01755	-0.114403	0.299752	-0.559702	-0.132782	0.114403	-0.800178	0.548492	0.196005	-0.572337	-0.018341	0.456928	0.018341	-0.391552	-0.020314	-1.0323	-1.15034	0.228806	-1.09993	-0.091564	-0.177664	0.180785	-0.001973
2	PFC0285c||PF3D7_0306800||T-complex protein beta subunit, putative	1.30332	0.363108	-0.01313	-0.87272	-0.118645	0.437234	0.01313	-1.05708	0.162694	0.659781	-0.098579	-1.56258	-0.056903	0.593977	0.056903	-1.37651	-1.42196	0.074126	0.02626	-0.184359	-0.219597	-0.065804	0.155482	0.186073
2	PF14_0456||PF3D7_1448000||U3 snoRNA-associated small subunit rRNA processing protein, putative	0.996292	0.832952	-0.614668	-0.860494	-0.137643	0.507232	0.137643	-0.784224	0.608548	0.562418	-0.531342	-1.16178	0.496108	0.530007	-0.496108	-0.991887	-1.13393	-0.32572	0.752311	0.07627	-0.11244	-0.032411	0.035234	0.169895
2	MAL13P1.73||PF3D7_1314100||conserved Plasmodium protein, unknown function	0.721728	0.607426	0.222325	-0.669055	-0.463426	-0.222325	0.478473	-0.502986	0.019388	0.700391	-0.019388	-1.08561	-0.586476	0.450555	0.139531	-1.15747	-1.18515	-0.829751	0.256148	0.166069	-0.605864	-0.249836	0.158919	-0.071861
2	PF14_0557||PF3D7_1458400||conserved Plasmodium protein, unknown function	0.550488	0.399044	0.310332	-0.396134	-0.679431	-0.537536	0.603986	-0.310332	-0.120359	0.517765	0.120359	-0.998903	-0.437237	0.364205	0.225732	-1.32885	-1.22992	-0.93658	0.293654	0.085802	-0.316878	-0.15356	0.105373	-0.32995
2	PF10_0328||PF3D7_1033700||bromodomain protein, putative	1.08788	0.084458	0.34416	-0.05691	-0.678142	-0.192934	0.05691	-0.489202	0.032175	0.082726	-0.077466	-0.93709	-0.032175	0.11269	0.127481	-1.29122	-1.76602	-0.277392	-0.28725	-0.432292	-0.06435	0.029964	0.204947	-0.35413
2	PF11_0274||PF3D7_1126400||large ribosomal subunit processing factor, putative	1.07504	0.895613	0.529842	-0.116969	-0.348806	0.089516	-0.089516	-0.116496	0.584362	0.679198	-0.263584	-1.38153	0.138783	0.742552	-0.138783	-1.28678	-1.42384	-0.806097	-0.619358	0.000473	-0.445579	0.063354	0.124801	0.094758
2	PFI1780w||PF3D7_0936800||Plasmodium exported protein (PHISTc), unknown function	2.67753	2.95843	-0.267962	-0.381621	-0.029507	1.65021	0.029507	-1.50467	2.08867	1.29137	-1.75638	-1.29137	1.95294	1.48151	-1.35115	-2.02132	-2.70704	-1.30822	0.297469	-1.12305	-0.135725	0.190138	0.405223	-0.729949
2	PF14_0677||PF3D7_1471000||RNA 3'-terminal phosphate cyclase-like protein, putative	1.35812	1.47068	0.283975	-0.072424	-0.288991	0.072424	-0.083882	-0.28144	0.61101	0.648622	-0.731318	-0.868979	0.372391	0.73884	-0.372391	-0.959833	-1.64712	-1.39826	-0.367857	-0.209016	-0.238619	0.090218	0.358927	-0.090854
2	PF11_0400||PF3D7_1138800||conserved Plasmodium protein, unknown function	0.524676	0.658685	0.320057	0.023253	-0.742271	-0.160526	-0.023253	-0.580496	0.107336	0.230252	-0.022923	-0.507981	0.215257	0.022923	-0.068005	-0.785001	-1.26695	-0.819211	-0.34331	-0.603749	0.107921	-0.207329	-0.045082	-0.27702
2	PF11_0270||PF3D7_1126000||threonine -- tRNA ligase, putative	0.862437	0.573627	-0.10592	-0.783265	-0.578105	0.196975	0.10592	-1.27127	0.359695	0.235874	-0.15005	-1.146	0.015902	0.313798	-0.015902	-1.27084	-1.44054	-0.376652	0.21184	-0.488009	-0.343793	0.077924	0.134148	-0.124843
2	PF13_0109||PF3D7_1319300||N2,N2-dimethylguanosine tRNA methyltransferase, putative	0.876728	1.10545	-0.104087	-0.110806	-0.541198	0.104087	0.243341	-1.24176	0.862702	0.438136	-0.789921	-0.922747	0.631279	0.429575	-0.429575	-1.35826	-1.41793	-1.00136	0.347428	-1.13096	-0.231423	-0.008561	0.360346	-0.435515
2	MAL13P1.222||PF3D7_1344900||conserved Plasmodium protein, unknown function	1.14235	1.12066	0.007904	0.013197	-0.68561	-0.007904	-0.25869	-0.868114	0.561392	0.614302	-0.606051	-0.621838	0.569097	0.51617	-0.51617	-0.836017	-1.82796	-1.12857	-0.266594	-0.881311	0.007705	-0.098132	0.089881	-0.214179
2	PFC0221c||PF3D7_0304900||conserved Plasmodium protein, unknown function	0.586838	0.729332	0.089856	-0.011856	-0.480922	-0.01962	0.011856	-0.142384	0.33821	0.29493	-0.618348	-1.00905	0.198766	0.311879	-0.198766	-1.09561	-1.06776	-0.748952	-0.078	-0.130528	-0.139444	0.016949	0.419582	-0.086566
2	PF13_0228||PF3D7_1342000||40S ribosomal protein S6, putative	0.703656	0.316049	-0.019664	-1.10696	-1.02459	0.067477	0.019664	-1.37193	-0.050778	0.450936	0.050778	-1.47496	-0.197974	0.368529	0.108718	-1.66353	-1.72824	-0.248572	0.039328	-0.264975	-0.147196	-0.082407	0.05794	-0.18857
2	PF13_0177||PF3D7_1332700||DEAD/DEAH box ATP-dependent RNA helicase, putative	1.1698	1.36853	0.049769	-0.109789	-0.280728	-0.049769	0.599209	-0.745015	0.612255	0.759563	-0.540132	-1.11939	0.281286	0.734826	-0.281286	-1.12718	-1.45053	-1.41829	0.54944	-0.635226	-0.330969	-0.024737	0.258846	-0.007789
2	PFD0690c||PF3D7_0414100||conserved Plasmodium membrane protein, unknown function	0.746901	0.187839	0.398618	-0.212722	-0.404394	-0.21801	0.651683	-0.187839	-0.438718	1.08181	0.438718	-0.583846	-0.775731	0.756748	0.786492	-0.690421	-1.15129	-0.405849	0.253065	0.024883	-0.337013	-0.325059	0.347774	-0.106575
2	PF11_0409||PF3D7_1139900||conserved Plasmodium protein, unknown function	0.864132	1.12911	0.680207	-0.249884	-0.851049	-0.32924	0.249884	-0.888466	0.245243	0.403473	-0.293767	-1.21833	0.129243	0.358853	-0.129243	-1.22148	-1.71518	-1.45835	-0.430323	-0.638582	-0.116	-0.04462	0.164524	-0.003143
2	PF07_0008||PF3D7_0702500||Plasmodium exported protein, unknown function	1.7006	2.39662	-0.439469	-0.476686	0.04787	1.38216	-0.04787	-1.03686	1.7089	0.988498	-1.21906	-1.2859	1.34347	1.32947	-0.988498	-1.65953	-1.65273	-1.01447	0.391599	-0.560169	-0.365434	0.340975	0.230559	-0.373629
2	PF13_0191||PF3D7_1334300||MSP7-like protein	0.766606	-0.794509	0.01345	-0.645217	-0.495372	-0.01345	0.518446	0.082698	-0.270932	0.891665	0.162894	-0.719795	-0.162894	0.709412	0.327792	-1.38414	-1.26198	0.781059	0.504996	0.727915	0.108038	-0.182253	0.164898	-0.664348
2	MAL13P1.43||PF3D7_1309000||conserved Plasmodium protein, unknown function	0.911085	0.877938	-0.044135	-0.519158	-0.405189	0.044135	0.607205	-0.80399	0.467311	0.574166	-0.202091	-1.30896	0.171629	0.772026	-0.171629	-1.18148	-1.31627	-0.833803	0.65134	-0.284832	-0.295682	0.19786	0.030462	0.127475
2	PF13_0048||PF3D7_1308900||NUDIX hydrolase, putative	0.333682	0.150276	0.012187	-0.33753	-0.707756	0.052798	-0.012187	-0.87088	-0.06012	0.300562	0.226669	-1.14567	-0.204562	0.422953	0.06012	-1.12028	-1.04144	-0.097478	-0.024374	-0.53335	-0.144442	0.122391	-0.166549	0.025399
2	PF14_0194||PF3D7_1420000||spliceosome-associated protein, putative	1.28102	0.848922	0.063553	-0.063553	-0.95921	0.14505	-0.563473	-1.22602	1.01561	0.23747	-0.23747	-0.723002	0.705534	0.468349	-0.322717	-0.852451	-2.24023	-0.703872	-0.627026	-1.16247	-0.310079	0.230879	-0.085247	-0.129449
2	PFC0070c||PF3D7_0301400||Plasmodium exported protein, unknown function	1.49409	0.721477	0.887197	-0.37766	-0.770695	-0.030157	0.022678	-0.022678	-0.424523	1.14596	0.424523	-1.24542	-0.558154	1.13547	0.818163	-1.1055	-2.26479	-0.751634	-0.864519	0.354982	-0.133631	-0.010487	0.39364	0.139923
2	PF14_0022||PF3D7_1402000||conserved Plasmodium protein, unknown function	0.8322	0.277942	0.178985	-0.178985	-0.508654	-0.217377	0.582721	-0.217468	-0.184527	0.733123	0.184527	-0.417944	-0.672963	0.714154	0.502051	-0.226565	-1.34085	-0.495319	0.403736	-0.038483	-0.488436	-0.018969	0.317524	0.191379
2	PFA0230c||PF3D7_0104500||conserved Plasmodium protein, unknown function	0.86623	0.190657	-0.065322	-0.873524	-1.07833	0.065322	0.596973	-0.800496	0.292026	0.651695	-0.288115	-1.26033	-0.05591	0.469858	0.05591	-1.27268	-1.94456	-0.125335	0.662295	0.073028	-0.347936	-0.181837	0.344025	-0.01235
2	PF10_0325||PF3D7_1033400||haloacid dehalogenase-like hydrolase, putative	1.36867	0.337666	-0.058596	-1.15086	-1.56079	0.058596	0.404102	-1.74659	0.042063	0.993963	-0.042063	-1.83603	-0.051059	0.848177	0.164927	-2.0468	-2.92946	-0.27907	0.462698	-0.595736	-0.093122	-0.145786	0.20699	-0.210767
2	MAL7P1.171||PF3D7_0730900||Plasmodium exported protein, unknown function	2.60961	2.43029	-0.512763	-0.151928	-0.676595	1.87891	0.151928	-1.29309	1.23644	1.15754	-1.37848	-1.15754	1.71956	1.33774	-1.20339	-1.70098	-3.2862	-0.551376	0.664691	-1.14117	0.483118	0.1802	0.175095	-0.543445
2	PFB0115w||PF3D7_0202400||conserved Plasmodium protein, unknown function	2.02415	0.254182	-0.254182	-1.49889	-1.39872	1.05943	0.915559	-1.06158	-0.073595	2.4895	-0.04644	-1.22884	0.04644	2.41669	0.127812	-1.28273	-3.42287	0.805245	1.16974	0.437316	0.120035	-0.072807	0.174252	-0.053887
2	PF11_0506||PF3D7_1149000||antigen 332, DBL-like protein	1.69052	-1.0833	-0.036094	-1.14419	-1.28001	0.510822	0.840612	0.036094	-0.843676	1.17601	0.642802	-1.5211	-0.642802	1.07466	0.785304	-1.82852	-2.97053	1.59412	0.876706	1.18029	0.200874	-0.101352	0.142502	-0.30742
2	PF07_0127||PF3D7_0730400||conserved Plasmodium protein, unknown function	-1.37243	2.15281	0.93427	2.91377	-0.02127	-1.14013	-1.75551	0.02127	0.264244	-0.879423	-0.10924	2.29317	0.10924	-0.801342	-0.297653	2.02618	1.35116	-3.29293	-2.68978	-2.8925	-0.155004	0.078081	-0.188413	-0.266995
2	PF11_0061||PF3D7_1105000||histone H4	-0.865609	1.11463	2.05817	1.45504	-0.093456	-1.00513	-0.96258	0.093456	-1.15496	-0.758625	1.47912	1.07883	-1.40497	-0.706461	1.6026	0.706461	0.772153	-2.11975	-3.02075	-1.36158	-0.250001	0.052164	0.123484	-0.372372
2	PF10_0280||PF3D7_1028600||conserved Plasmodium protein, unknown function	-0.255532	1.43453	2.38966	2.16753	-0.050252	-0.458602	-0.661342	0.050252	-0.356773	-0.871845	0.356773	1.02892	-0.565393	-0.800238	0.710713	0.425396	0.20528	-1.89313	-3.051	-2.11727	-0.20862	0.071607	0.35394	-0.603527
2	PF14_0604a||PF3D7_1463600||conserved Plasmodium protein, unknown function	0.004137	0.358053	1.60414	0.172879	-0.294138	-0.700788	-0.112454	-0.004137	-0.487612	0.381335	0.838153	-0.433	-0.957865	0.382889	1.05899	-0.381335	-0.298275	-1.05884	-1.71659	-0.177016	-0.470253	0.001554	0.220836	0.051665
2	PFI1250w||PF3D7_0925500||thioredoxin-like protein 2	0.222635	0.427619	0.92975	0.348261	-0.6207	-0.869947	-0.222635	-0.573116	-0.60402	0.250662	0.412586	-0.461439	-0.781835	0.140894	0.564137	-0.140894	-0.843335	-1.29757	-1.15238	-0.921377	-0.177815	-0.109768	0.151551	0.320545
2	MAL13P1.23-a||PF3D7_1304200||CorA-like Mg2 transporter protein, putative	0.08118	2.13665	0.937315	2.38753	-0.254066	-0.514694	-1.08668	-0.08118	-0.055775	-0.1327	-0.430849	2.0702	0.219469	0.055775	-0.334026	2.17122	-0.335246	-2.65134	-2.024	-2.46871	0.275244	0.188475	0.096823	0.101018
2	PFL0750w||PF3D7_1215600||conserved Plasmodium protein, unknown function	-0.261161	0.808159	1.70356	1.45473	-0.755078	-1.30446	-0.154787	0.154787	-0.900773	-0.11679	0.11679	0.44549	-1.10138	-0.196242	1.04377	0.572129	-0.493917	-2.11262	-1.85835	-1.29994	-0.200605	-0.079452	0.926984	0.126639
2	PF11_0095||PF3D7_1108200||D-tyrosyl-tRNA(Tyr) deacylase, putative	0.346117	1.24824	0.599613	1.35181	-0.490277	-0.346117	-0.429782	-0.751356	-0.03206	0.095471	-0.256857	0.432518	-0.1596	0.006336	-0.006336	0.484563	-0.836394	-1.59436	-1.0294	-2.10317	-0.12754	-0.089135	0.250521	0.052045
2	PF11_0290||PF3D7_1127900||conserved Plasmodium protein, unknown function	0.234702	1.57694	0.180872	2.06126	-0.432287	-0.21388	-0.270379	-0.180872	0.466247	-0.466247	-0.88762	1.82166	0.660667	-0.515421	-0.55782	1.0647	-0.666989	-1.79082	-0.451251	-2.24213	0.19442	-0.049174	0.3298	-0.756956
2	PF11_0202||PF3D7_1119500||clathrin coat assembly protein, putative	0.598714	0.892016	1.09604	0.54008	-0.756749	-0.84399	-1.07226	-0.54008	0.037128	-0.037128	0.289033	-0.39605	-0.332556	0.184834	0.296312	-0.39198	-1.35546	-1.73601	-2.1683	-1.08016	-0.369684	0.221962	0.007279	0.00407
2	PF13_0296||PF3D7_1355800||splicing factor 3b subunit, putative	-0.312303	0.122907	0.168136	-0.122907	-0.947996	0.161351	0.441971	-0.632529	0.486935	0.154536	-0.424976	0.02396	-0.031577	0.398873	-0.02396	-0.072295	-0.635693	0.038444	0.273835	-0.509622	-0.518512	0.244337	0.401016	-0.096255
2	MAL13P1.307||PF3D7_1361600||conserved Plasmodium protein, unknown function	0.135575	0.782495	1.86253	0.970718	-0.529096	-1.04671	-0.299785	-0.135575	-0.522911	-0.360721	0.959929	0.317305	-0.522692	-0.240727	1.03399	0.240727	-0.664671	-1.8292	-2.16231	-1.10629	0.000219	0.119994	0.074063	-0.076578
2	PFE0375w||PF3D7_0507600||cell differentiation protein rcd1, putative	0.529805	0.697135	0.77373	0.752342	-0.982858	-0.529805	-1.05567	-0.960709	-0.022555	-0.126248	0.082798	0.303859	0.022555	-0.107332	0.141209	-0.193877	-1.51266	-1.22694	-1.8294	-1.71305	0.04511	0.018916	0.058411	-0.497736
2	MAL8P1.71||PF3D7_0818000||conserved Plasmodium protein, unknown function	0.250464	0.396937	0.891258	0.495393	-0.965633	-0.250464	-0.592155	-0.324738	0.205678	-0.243723	0.01146	-0.01146	0.59054	-0.090795	0.449063	-0.581503	-1.2161	-0.647401	-1.48341	-0.820131	0.384862	0.152928	0.437603	-0.570043
2	PF14TR011||PF3D7_1478900||product unspecified	0.020819	-0.012174	0.397464	0.012174	-0.806557	-0.884105	-0.36241	0.74862	-0.029615	0.37807	0.181933	-0.853956	-0.021663	0.975569	0.021663	-0.980586	-0.827376	-0.871931	-0.759874	0.736446	0.007952	0.597499	-0.16027	-0.12663
2	PFE1375c||PF3D7_0527600||conserved Plasmodium protein, unknown function	0.304886	1.01339	1.15225	1.1574	-1.03033	-0.787057	-0.304886	-0.825859	-0.129268	0.006246	0.230855	0.195366	-0.341506	-0.006246	0.330335	-0.290044	-1.33521	-1.80044	-1.45714	-1.98326	-0.212238	-0.012492	0.09948	-0.48541
2	PFL1115w||PF3D7_1223200||conserved Plasmodium protein, unknown function	0.380886	0.846776	1.28403	0.857023	-0.94795	-0.778243	-0.832445	-0.380886	-0.039134	0.020637	0.257884	-0.020637	-0.675928	0.176029	0.379597	-0.134525	-1.32884	-1.62502	-2.11647	-1.23791	-0.636794	0.155392	0.121713	-0.113888
3	PF11_0204||PF3D7_1119700||conserved Plasmodium protein, unknown function	0.114669	2.61457	1.65528	2.45096	-0.362134	-0.642259	-0.740381	-0.114669	0.491021	-0.564092	-0.365704	2.05233	0.148628	-0.57706	-0.148628	1.89409	-0.476803	-3.25683	-2.39566	-2.56563	-0.342393	-0.012968	0.217076	-0.158246
3	PF11_0113||PF3D7_1110600||mitochondrial ribosomal protein L11 precursor, putative	-0.498079	0.965516	1.70193	1.3548	-0.851616	-0.989136	-0.136476	0.136476	-0.685391	-0.593192	0.798087	0.240725	-0.840869	-0.240725	0.838998	0.35571	-0.353537	-1.95465	-1.8384	-1.21833	-0.155478	0.352467	0.040911	0.114985
3	PFC0920w||PF3D7_0320900||histone H2A variant, putative	0.544681	2.96998	3.13561	2.95643	-1.21365	-0.851799	-0.934505	-0.544681	-0.137842	-0.76635	0.137842	0.688349	-0.315272	-0.296323	0.433394	0.278919	-1.75833	-3.82178	-4.07011	-3.50111	-0.17743	0.470027	0.295552	-0.40943
3	PFF0510w||PF3D7_0610400||histone H3	-0.077446	4.43034	5.26383	4.25929	-1.28231	-0.838223	0.077446	-0.510322	-1.25237	-1.50308	1.00621	1.53835	-1.20656	-0.998536	1.70253	0.998536	-1.20487	-5.26856	-5.18638	-4.76961	0.045817	0.504548	0.696321	-0.539812
3	PF11_0062||PF3D7_1105100||histone H2B	-0.002503	2.43017	3.57403	3.59099	-1.8612	-0.4505	0.002503	-0.144612	-1.39537	-1.05202	0.908723	1.23866	-1.56308	-0.908723	1.50511	0.920023	-1.8587	-2.88067	-3.57152	-3.7356	-0.167718	0.143293	0.596388	-0.318642
3	PFA0425c||PF3D7_0108600||conserved Plasmodium protein, unknown function	0.07638	0.037126	-1.34488	-0.037126	1.29978	0.047036	-1.82963	-1.31654	1.67444	-0.137788	-0.671833	0.137788	0.707928	0.413044	-0.796805	-0.614563	1.2234	0.00991	-0.484747	-1.27941	-0.96651	0.550832	-0.124972	-0.752351
3	PF14_0183||PF3D7_1418800||signal recognition particle, RNP, putative	-0.152193	3.84205	2.15809	1.56558	0.148065	-0.148065	-0.500066	-1.50269	0.257167	-0.513977	0.760594	-1.67685	-0.257167	1.63866	0.419834	-0.892983	0.300258	-3.99011	-2.65816	-3.06827	-0.514334	2.15264	-0.34076	0.78387
3	eGFP_mut2||eGFP_mut2||eGFP_mut2	1.57015	-0.07615	0.07615	-0.391698	0.998098	-0.181723	-1.0299	1.29951	0.334634	0.089365	0.124987	-0.668338	-0.549865	1.29771	-0.089365	-0.161067	-0.572056	-0.105573	-1.10605	1.69121	-0.884499	1.20834	-0.214352	0.507271
3	PF11_0449||PF3D7_1143600||conserved Plasmodium protein, unknown function	0.789658	-0.363682	-0.407843	0.038197	0.862843	-0.038197	-0.89935	0.496399	0.987793	0.23853	-0.768099	0.002181	0.932457	-0.002181	-0.65734	-0.533891	0.073185	0.325485	-0.491507	0.458202	-0.055336	-0.240711	0.110759	-0.536072
3	PFE0670w||PF3D7_0513500||mitochondrial matrix protein, putative	0.884211	0.072206	-0.16961	-1.02035	0.420393	0.113949	-0.440402	-0.072206	0.612109	0.904509	-0.406203	-0.608752	0.106474	0.813762	-0.106474	-0.824862	-0.463818	0.041743	-0.270792	0.948145	-0.505635	-0.090747	0.299729	-0.21611
3	Pfa_snoR_24||PF3D7_1424000||ncRNA	0.608259	-0.121912	-0.794296	-1.23088	0.268269	0.229213	-0.069649	0.069649	0.84616	0.956823	-0.507256	-0.969532	0.131849	1.03074	-0.131849	-1.058	-0.33999	0.351125	0.724647	1.30053	-0.714311	0.073915	0.375407	-0.088465
3	PFA0470c||PF3D7_0109600||cold-shock protein, putative	-0.069501	-0.189615	0.069501	-0.307349	0.821562	0.195257	-0.419208	0.272021	0.088669	-0.39839	-0.088669	-0.760854	0.158464	0.397716	0.29602	-0.630729	0.891063	0.384872	-0.488709	0.57937	0.069795	0.796106	0.384689	0.130125
3	PF11_0512||PF3D7_1149500||ring-infected erythrocyte surface antigen 2	0.19753	1.11963	-1.8099	-0.001232	0.053256	0.001232	-1.60111	-0.839918	1.44258	0.439678	-2.40218	-0.360579	1.63043	0.360579	-2.01639	-0.732949	-0.144274	-1.1184	0.208788	-0.838686	0.187854	-0.079099	0.385794	-0.37237
3	PF10_0063||PF3D7_1006200||DNA/RNA-binding protein Alba, putative	0.136146	-0.05724	0.045148	-0.917343	0.843935	-0.045148	-0.669895	0.484944	0.285271	-0.082153	-0.130617	-1.01482	0.161616	0.220827	0.082153	-1.72514	0.707789	0.012092	-0.715043	1.40229	-0.123655	0.30298	0.21277	-0.710325
3	PFA0715c||PF3D7_0114800||Plasmodium exported protein (hyp7), unknown function	0.920622	0.441136	-0.728734	-1.22872	0.339194	-0.339194	-0.624411	0.517589	0.56114	1.42999	-2.06187	-1.55495	0.347553	1.96965	-0.806454	-0.347553	-0.581428	-0.78033	0.104323	1.74631	-0.213587	0.539661	1.25542	1.2074
3	PF10_0330||PF3D7_1033900||ubiquitin conjugating enzyme, putative	-1.04832	-0.775953	0.471257	0.172191	0.607368	-0.113706	-0.871302	0.113706	-0.247515	-1.17698	0.473428	0.525019	-0.420102	-0.578736	0.247515	0.528841	1.65569	0.662247	-1.34256	-0.058485	-0.172587	0.598241	-0.225913	0.003822
3	PFI1775w||PF3D7_0936700||lysophospholipase, putative	0.428276	1.98109	-1.04022	0.859679	0.453877	-0.428276	-2.1239	-0.76922	0.744063	-0.989204	-1.94567	0.187968	0.4917	-0.187968	-1.78028	0.259606	0.025601	-2.40936	-1.08368	-1.6289	-0.252363	0.801236	0.165384	0.071638
3	PFL0795c||PF3D7_1216500||male development gene 1	1.16625	-0.477846	-0.621223	0.101013	1.28225	-0.101013	-0.365788	0.369284	1.42247	0.522286	-0.830924	-0.522286	1.06754	0.774997	-0.633318	-1.10115	0.115992	0.376833	0.255435	0.268271	-0.354932	0.252711	0.197606	-0.578867
3	PF13_0045||PF3D7_1308300||40S ribosomal protein S27, putative	0.258011	0.146718	-0.311726	-1.69718	0.676564	-0.146718	-0.925145	0.463247	0.053304	0.572364	-0.053304	-1.56132	-0.423985	0.76323	0.26908	-1.72978	0.418553	-0.293436	-0.613419	2.16043	-0.477289	0.190866	0.322384	-0.168456
3	PFC0358w||PF3D7_0308400||product unspecified	0.064134	1.19972	-0.064134	-0.487311	0.394124	0.146583	-1.3666	-1.21392	1.36681	-0.829318	-0.740836	0.160054	1.20578	0.226321	-1.06133	-0.160054	0.32999	-1.05314	-1.30247	-0.726607	-0.161033	1.05564	-0.320493	-0.320108
3	PF08_0022||PF3D7_0826200||conserved Plasmodium protein, unknown function	-0.513505	-0.207484	0.762639	0.207484	0.31639	-0.416301	-0.424914	0.666395	-0.241076	-0.522927	0.836899	0.264384	-0.372386	-0.375409	0.369705	0.241076	0.829895	-0.208817	-1.18755	0.458911	-0.13131	0.147518	-0.467194	-0.023308
3	Pfa_snoR_09||PF3D7_1109500||ncRNA	1.41989	0.752133	0.118315	-0.118315	-0.270609	0.336845	-0.172842	-0.885849	0.859505	0.994501	-0.360216	-0.339067	0.179658	1.3551	-0.179658	-0.608276	-1.6905	-0.415288	-0.291157	-0.767534	-0.679847	0.360598	0.180558	-0.269209
3	PF10_0372-a||PF3D7_1038000||antigen UB05	-0.64623	-0.157779	0.717415	0.157779	0.670315	-0.597733	-1.30142	0.371086	-0.121389	-0.318518	0.652388	0.547614	-0.368799	-0.127373	0.51323	0.121389	1.31655	-0.439954	-2.01883	0.213307	-0.24741	0.191145	-0.139158	-0.426225
3	PFB0950w||PF3D7_0221000||conserved Plasmodium falciparum protein family	0.861933	0.837903	-0.217025	-0.59283	0.217025	-0.446243	-0.603867	0.310523	0.143316	1.24482	-0.143316	-0.57262	0.177734	0.952362	-0.162117	-0.24486	-0.644908	-1.28415	-0.386842	0.903353	0.034418	-0.292456	-0.018801	0.32776
3	PF08_0041||PF3D7_0821500||ribosome biogenesis protein nep1 homologue, putative	0.699287	1.23771	0.074204	-0.35071	-0.011522	0.011522	-0.271567	-0.460202	0.857598	0.824256	-0.430249	-0.78944	0.336934	1.28644	-0.336934	-1.00749	-0.710809	-1.22619	-0.345771	-0.109492	-0.520664	0.462184	0.093315	-0.218054
3	PF10_0038||PF3D7_1003500||40S ribosomal protein S20e, putative	0.983605	0.876878	0.113213	-0.572936	-0.045626	0.045626	-0.648649	-0.261272	0.267251	0.340535	-0.14599	-0.903059	-0.127081	0.795669	0.127081	-1.16184	-1.02923	-0.831252	-0.761862	0.311664	-0.394332	0.455134	0.273071	-0.258781
3	PF11_0040||PF3D7_1102800||early transcribed membrane protein 11.2	-0.764008	1.92059	-2.26459	0.220797	1.14305	-0.220797	-1.2177	0.861195	2.2643	-1.01239	-2.83279	1.38631	1.75381	-0.182296	-2.52983	0.182296	1.90706	-2.14139	1.04689	0.640398	-0.510491	0.830097	0.302963	-1.20402
3	PF11_0199||PF3D7_1119200||conserved Plasmodium protein, unknown function	0.790454	-0.225881	-0.622115	-0.724264	0.477243	0.342719	-0.068897	0.068897	1.60139	0.993521	-0.821543	-0.908731	0.576532	0.680827	-0.576532	-1.47285	-0.313211	0.5686	0.553218	0.793161	-1.02486	-0.312694	0.245011	-0.564121
3	PF14_0792||PF3D7_1461700||conserved Plasmodium protein, unknown function	0.274159	-0.034064	-0.687889	-0.307564	0.463904	0.034064	-0.459849	0.257983	1.01397	0.118889	-0.798978	-0.118889	0.347476	0.261579	-0.811784	-0.472944	0.189745	0.068128	0.22804	0.565547	-0.666491	0.14269	-0.012806	-0.354055
3	PFF0605c||PF3D7_0612500||conserved Plasmodium protein, unknown function	0.654922	-0.364197	-0.205864	0.068594	0.415424	-0.068594	-0.384443	0.690506	-0.260834	0.00744	0.023945	0.170807	0.084742	-0.274824	-0.00744	-0.197675	-0.239498	0.295603	-0.178579	0.621912	0.345576	-0.282264	-0.031385	-0.368482
3	PF13_0342||PF3D7_1365000||conserved Plasmodium protein, unknown function	0.306218	-0.494339	0.136583	-0.077952	0.295124	-0.269185	-0.251837	0.077952	0.245118	0.111357	-0.037983	-1.02868	0.665187	-0.087593	0.037983	-1.57577	-0.011094	0.225154	-0.38842	0.155904	0.420069	-0.19895	0.075966	-0.547089
3	MAL13P1.312||PF3D7_1362600||conserved Plasmodium protein, unknown function	1.42562	-0.456993	-0.640513	-0.31128	0.715559	-0.091167	0.091167	0.487938	0.331406	-0.16844	-0.011505	0.030474	0.534024	-0.104532	0.011505	-0.43097	-0.710061	0.365826	0.73168	0.799218	0.202618	0.063908	0.02301	-0.461444
3	PFC10_API0058:tRNA||PFC10_API0058:tRNA||apicoplast tRNA	-0.803777	-0.274533	1.68121	0.105001	0.374542	-0.105001	-0.512126	0.456557	-1.50649	-0.144756	0.073439	0.097073	-2.20962	0.078964	0.439022	-0.073439	1.17832	0.169532	-2.19334	0.351556	-0.703136	0.22372	0.365583	-0.170512
3	PFD0367w||PF3D7_0407500||mitochondrial carrier protein, putative	0.167702	-0.315868	-0.29476	-1.03903	0.138613	0.030471	-0.030471	0.134019	0.057879	0.575747	-0.057879	-1.27254	-0.261594	1.0429	0.146996	-0.956373	-0.029089	0.346339	0.264289	1.17305	-0.319473	0.467152	0.204875	0.316167
3	PF08_0136||PF3D7_0801400||hypothetical protein	0.699043	0.011219	-0.797797	0.090412	0.284993	-0.241712	-0.79028	-0.011219	0.238228	-0.171479	-1.0506	0.037205	-0.037205	0.179556	-0.85032	0.310926	-0.41405	-0.252931	0.007517	-0.101631	-0.275433	0.351035	0.200282	0.273721
3	PFB0120w||PF3D7_0202500||early transcribed membrane protein 2	-0.252258	1.89951	-2.13358	0.005499	1.10978	-0.005499	-1.27122	0.709263	2.26225	-0.922188	-2.61854	1.53176	1.60142	-0.318783	-2.50475	0.318783	1.36203	-1.90501	0.862358	0.703764	-0.660839	0.603405	0.113784	-1.21298
3	PFC0495w||PF3D7_0311700||plasmepsin VI	0.778448	0.053927	-1.0881	-0.673628	0.44262	-0.053927	-0.314111	0.157167	1.00255	0.26669	-0.611892	-0.430214	0.854034	0.618421	-0.364319	-0.26669	-0.335828	-0.107854	0.77399	0.830795	-0.148519	0.351731	0.247573	0.163524
3	PFB0225c||PF3D7_0205000||conserved Plasmodium protein, unknown function	0.205061	-0.750996	-0.361371	-0.090426	0.389747	0.090426	-0.438401	0.363209	0.419146	-0.047371	-0.201402	0.086187	0.487452	0.047371	-0.234621	-0.135793	0.184686	0.841422	-0.07703	0.453635	0.068306	0.094742	-0.033219	-0.22198
3	PF10_0070a||PF3D7_1007100||conserved Plasmodium protein, unknown function	-0.713004	0.04582	0.174378	0.259095	0.06053	-0.469512	-0.920173	-0.04582	-0.131151	-0.591751	-0.11452	0.809161	0.11452	-0.405024	0.230269	0.962001	0.773534	-0.515332	-1.09455	-0.304915	0.245671	0.186727	0.344789	0.15284
3	PFE1100w||PF3D7_0522000||conserved Plasmodium protein, unknown function	0.461001	-0.253303	-0.241085	-0.356089	0.416146	0.542823	0.105612	-0.105612	0.513103	0.319112	-0.601831	-0.760899	0.319363	0.578811	-0.319112	-1.61465	-0.044855	0.796126	0.346697	0.250477	-0.19374	0.259699	0.282719	-0.853755
3	PFE0880c||PF3D7_0517600||f-actin capping protein beta subunit, putative	0.182008	-0.065328	-1.12871	-0.167535	0.348268	0.065328	-0.38551	0.222157	0.651717	-0.239508	-1.54499	0.260337	0.660121	0.007409	-1.29679	-0.007409	0.16626	0.130656	0.743196	0.389692	0.008404	0.246917	0.248205	-0.267746
3	PFI1435w||PF3D7_0929200||RNA binding protein, putative	-0.063953	-0.01774	-0.280161	-0.241439	0.630791	0.432775	0.01774	0.352135	0.329676	-0.07129	-0.441205	-0.167101	0.227441	0.135137	0.07129	-0.475939	0.694744	0.450515	0.297901	0.593574	-0.102235	0.206427	0.512495	-0.308838
3	MAL7P1.20||PF3D7_0704900||peptide chain release factor, putative	-0.178164	0.010563	0.955774	-0.010563	0.526367	-0.666136	-0.144743	1.00082	-0.962614	-0.498202	0.368292	-0.282559	-1.35048	0.282559	0.729148	0.341692	0.704531	-0.676699	-1.10052	1.01138	-0.387867	0.780761	0.360856	0.624251
3	MAL7P1.94||PF3D7_0718500||prefoldin subunit 3, putative	0.064732	-0.663393	-0.052559	-0.546407	0.557982	0.375825	-0.152093	0.052559	-0.059269	0.059269	0.15509	-0.443001	-0.351546	0.228533	0.258479	-0.682971	0.49325	1.03922	-0.099534	0.598966	-0.292277	0.169264	0.103389	-0.23997
3	MAL1_ITS1||PF3D7_0112400||product unspecified	-0.023301	0.219271	0.023301	-0.401497	0.250204	-0.393213	-0.808057	0.5503	-0.609095	-0.175844	-0.297696	0.297443	-0.52616	0.175844	0.390167	0.184326	0.273505	-0.612484	-0.831358	0.951797	0.082935	0.351688	0.687863	-0.113117
3	PFD0360w||PF3D7_0407300||transcription factor, putative	0.406109	0.801712	-0.56082	-0.710236	0.097185	0.113103	-0.603198	-0.097185	0.446501	0.542794	-0.652718	-0.891845	0.516434	0.807964	-0.446501	-0.629434	-0.308924	-0.688609	-0.042378	0.613051	0.069933	0.26517	0.206217	0.262411
3	PF14_0728||PF3D7_1476000||conserved Plasmodium protein, unknown function	0.936928	1.36363	-0.476727	-0.785602	0.383996	0.201287	-0.577582	-0.201287	1.70776	0.678943	-0.746435	-0.869504	0.924717	1.07286	-0.701991	-0.678943	-0.552932	-1.16234	-0.100855	0.584315	-0.78304	0.393914	0.044444	0.190561
3	PFI1785w||PF3D7_0936900||Plasmodium exported protein (PHISTb), unknown function	2.54246	0.519045	1.1127	-0.152566	-0.371959	0.152566	-0.637607	-0.159786	-0.026628	2.00232	0.246795	-1.32357	-0.607892	1.58262	0.026628	-1.75587	-2.91442	-0.366479	-1.7503	-0.00722	-0.581264	-0.419697	-0.220167	-0.432297
3	PFD0403w||PF3D7_0408200||conserved Plasmodium protein, unknown function	-0.215753	0.191003	-0.202018	0.514408	0.585692	-0.362471	-0.191003	0.428537	0.106672	-0.491748	-0.540012	1.95235	1.15609	-0.569237	-0.106672	0.955712	0.801445	-0.553474	0.011015	-0.085871	1.04942	-0.077489	0.43334	-0.996635
3	PF14_0740||PF3D7_1477000||Plasmodium exported protein (hyp17), unknown function	2.79359	3.12579	-0.434311	0.111711	-0.111711	1.55213	-1.18504	-0.424827	1.77142	0.759567	-2.09749	-0.759567	1.32291	1.00942	-1.65872	-1.55947	-2.9053	-1.57366	-0.750725	-0.536538	-0.448509	0.249853	0.43877	-0.799907
3	MAL7P1.142||PF3D7_0725500||conserved Plasmodium membrane protein, unknown function	0.002248	0.22569	-0.33162	-0.627558	-1.0053	0.113402	-0.002248	0.433997	0.35978	-0.177639	0.106005	-0.178737	-0.433592	0.918286	-0.020136	0.020136	-1.00755	-0.112288	0.329372	1.06156	-0.793372	1.09593	-0.126141	0.198873
3	PFF0860c||PF3D7_0617800||histone H2A	-1.14587	1.47254	2.73046	1.96818	-0.056913	-1.37569	-1.5764	0.056913	-0.973601	-0.75378	1.82597	1.77517	-0.764402	-0.551758	2.21458	0.551758	1.08896	-2.84823	-4.30687	-1.91127	0.209199	0.202022	0.38861	-1.22341
3	PF10_0063a||PF3D7_1006300||conserved Plasmodium protein, unknown function	0.897795	0.531192	-0.448092	-0.248627	0.244998	-0.244998	-0.467255	0.476105	0.693512	0.215994	-0.833762	-0.612595	0.463559	0.490917	-0.499157	-0.215994	-0.652797	-0.77619	-0.019163	0.724732	-0.229953	0.274923	0.334605	0.396601
3	PF13_0088||PF3D7_1315800||Myb1-related transcription factor	0.067897	-0.22485	0.186684	-0.067897	0.175214	-0.087947	-0.532208	0.07087	0.217214	0.130484	-0.10238	-0.574792	-0.031227	0.031227	0.040056	-0.864541	0.107317	0.136903	-0.718892	0.138767	-0.248441	-0.099257	0.142436	-0.289749
3	PF14_0128-a||PF3D7_1412900||non-canonical ubiquitin conjugating enzyme, putative	0.092241	-0.092241	-0.405985	-0.533831	0.584284	0.40303	-0.450427	0.648642	0.582523	0.01456	-0.01456	-0.760238	0.256284	0.142217	-0.332651	-0.85809	0.492043	0.495271	-0.044442	1.18247	-0.326239	0.127657	-0.318091	-0.097852
3	PFD0320c||PF3D7_0406500||conserved Plasmodium protein, unknown function	0.492299	-0.295438	-0.050354	-0.011948	0.456232	-0.022741	0.011948	0.345874	0.449391	0.059315	0.197788	-0.315513	0.730275	-0.059315	-0.135942	-0.818993	-0.036067	0.272697	0.062302	0.357822	0.280884	-0.11863	-0.33373	-0.50348
3	PF13_0167||PF3D7_1331200||conserved Plasmodium protein, unknown function	0.276747	-0.140778	-0.181092	-0.26062	0.524734	0.230994	0.140778	-0.326597	0.373917	0.444506	-0.600789	-0.529923	0.25953	0.285245	-0.25953	-0.74813	0.247987	0.371772	0.32187	-0.065977	-0.114387	-0.159261	0.341259	-0.218207
3	MAL7P1.123||PF3D7_0722900||conserved Plasmodium protein, unknown function	-1.02378	0.063949	0.97301	0.871842	-0.063949	-0.951989	-1.30111	0.553256	-0.512861	-0.585141	0.656222	1.58559	-0.579753	-0.4651	0.4651	1.44254	0.959836	-1.01594	-2.27412	-0.318586	-0.066892	0.120041	-0.191122	-0.143052
3	PFA0315w||PF3D7_0106400||conserved Plasmodium protein, unknown function	0.780854	0.227474	-0.758107	-1.11517	0.496122	0.611538	-0.227474	-0.442715	0.802599	0.995437	-1.10776	-1.58903	0.587077	0.845201	-0.587077	-1.83089	-0.284732	0.384064	0.530633	0.672456	-0.215522	-0.150236	0.520678	-0.241857
3	PFC10_API0001:tRNA||PFC10_API0001:tRNA||apicoplast tRNA	-0.856354	0.669197	1.84834	0.934807	0.06241	-0.06241	-0.449377	-0.292321	-0.807484	-0.863085	1.60766	1.21191	-1.21583	-0.225282	0.225282	0.806709	0.918764	-0.731607	-2.29772	-1.22713	-0.408345	0.637803	-1.38237	-0.405198
3	PFI1520w||PF3D7_0931300||asparagine-rich antigen, putative	0.809483	1.65836	-1.62804	-1.51847	0.166298	-0.117738	0.117738	-0.550607	1.26416	0.887634	-2.12916	-0.887634	1.22316	1.31674	-1.73926	-1.00135	-0.643185	-1.77609	1.74578	0.967867	-0.041004	0.429105	0.3899	-0.113717
3	PF11_0266||PF3D7_1125500||small nuclear ribonucleoprotein D1, putative	0.431157	0.264759	-0.026815	-0.76035	0.429532	-0.072474	-0.721696	0.026815	0.21965	0.579602	-0.126679	-1.14617	0.106289	0.351395	-0.106289	-1.0988	-0.001625	-0.337233	-0.694881	0.787165	-0.113361	-0.228207	0.02039	0.047375
3	PFL0325w||PF3D7_1206500||Tat binding protein 1(TBP-1)-interacting protein, putative	0.87827	-0.054281	-0.474919	0.303601	-0.095831	0.054281	-0.226302	0.235709	0.646547	0.371633	-0.926457	-0.326458	0.85399	0.326458	-0.875199	-0.63315	-0.974101	0.108562	0.248617	-0.067892	0.207443	-0.045175	0.051258	-0.306692
3	PF08_0075||PF3D7_0814000||60S ribosomal protein L13-2, putative	0.679553	0.171102	-0.171102	-1.26619	0.213556	0.308266	-0.380555	-0.185539	0.365679	0.270309	-0.634072	-2.06433	0.184247	0.615902	-0.184247	-3.07344	-0.465997	0.137164	-0.209453	1.08065	-0.181432	0.345593	0.449825	-1.00911
3	PF11_0198||PF3D7_1119100||tRNA m(1)G methyltransferase, putative	0.991261	0.692033	0.65317	0.003194	-0.292952	-0.003194	-0.532797	-0.34938	-0.166612	0.367647	0.166612	-0.951621	-0.180016	0.782757	0.23382	-1.17614	-1.28421	-0.695227	-1.18597	-0.352574	-0.013404	0.41511	0.067208	-0.224521
3	PFB0875c||PF3D7_0218700||chromatin-binding protein, putative	0.446717	-0.030748	-0.053178	0.030748	0.409167	0.208123	-0.078211	-0.661003	0.633837	0.395168	-0.496725	-0.461477	0.734424	0.270673	-0.270673	-1.03156	-0.03755	0.238871	-0.025033	-0.691751	0.100587	-0.124495	0.226052	-0.570083
3	PF14_0287||PF3D7_1430800||conserved Plasmodium protein, unknown function	1.16046	0.724105	-0.48788	0.124787	0.078735	-0.612533	-1.13184	-0.078735	1.9098	0.419867	-0.691614	-0.419867	0.872748	0.506979	-0.487609	-0.731454	-1.08172	-1.33664	-0.643964	-0.203522	-1.03706	0.087112	0.204005	-0.311587
3	PFI0205w||PF3D7_0904200||conserved Plasmodium protein, unknown function	1.73365	0.177875	-1.05646	-0.439483	0.164245	-0.164245	-0.563885	0.374336	0.907377	0.32601	-0.899779	-0.836732	0.42201	0.62843	-0.32601	-0.647998	-1.5694	-0.34212	0.492579	0.813819	-0.485367	0.30242	0.573769	0.188734
3	PF14_0575a||PF3D7_1460300||ribosomal protein L29, putative	1.46502	1.65423	1.27771	-0.239088	-1.06651	0.230722	-0.230722	-1.65389	0.389441	0.525524	-0.629037	-1.74803	-0.157164	0.888006	0.157164	-2.13248	-2.53153	-1.42351	-1.50843	-1.41481	-0.546605	0.362482	0.786201	-0.38445
3	PF11_0479||PF3D7_1146800||conserved Plasmodium protein, unknown function	1.39773	0.606627	-0.891808	-0.217203	0.217203	-0.367816	-0.680444	0.41214	0.79484	0.391651	-1.00894	-0.173999	0.864669	0.173999	-0.797808	-0.298134	-1.18053	-0.974443	0.211364	0.629343	0.069829	-0.217652	0.211132	-0.124135
3	MAL13P1.92||PF3D7_1317800||40S ribosomal protein S15/S19, putative	0.680755	0.795567	0.386271	-0.853752	0.156749	-0.156749	-0.735673	-0.193181	0.31058	0.383047	-0.806647	-1.91992	0.068585	0.270717	-0.068585	-3.02254	-0.524006	-0.952316	-1.12194	0.660571	-0.241995	-0.11233	0.738062	-1.10262
3	Pfa_snoR_01||PF3D7_0219000||ncRNA	-0.033206	0.010284	-0.010284	-0.640176	0.325114	0.295683	0.328397	-0.11308	0.262769	0.590924	-0.301885	-0.553267	-0.104509	0.324988	0.104509	-0.85403	0.35832	0.285399	0.338681	0.527096	-0.367278	-0.265936	0.406394	-0.300763
3	PF13_0358||PF3D7_1368600||mitochondrial import inner membrane translocase, putative	0.640062	0.050493	-0.050493	-0.545415	-0.120248	0.617528	0.340648	-0.192876	-0.202213	0.674701	-0.321393	-1.33186	0.202213	0.58525	0.231393	-1.59486	-0.76031	0.567035	0.391141	0.352539	0.404426	-0.089451	0.552786	-0.263001
3	PF12TR015||PF3D7_1244300||product unspecified	0.088942	2.48487	0.107781	-0.293541	-0.088942	0.561803	-0.169021	-1.40959	2.24656	0.05028	-0.05028	-1.55736	2.34696	1.15993	-0.786785	-1.66226	-0.177884	-1.92306	-0.276802	-1.11605	0.100399	1.10965	-0.736505	-0.104897
3	PFL2510w||PF3D7_1252200||chitinase	-0.785384	1.52209	-0.731631	0.415314	0.402569	-0.402569	-0.942875	0.432416	0.838402	-1.68382	-1.02682	2.66074	1.06208	-1.46541	-0.838402	2.26956	1.18795	-1.92466	-0.211244	0.017102	0.223682	0.218417	0.188414	-0.391186
3	PF14_0450||PF3D7_1447200||conserved Plasmodium protein, unknown function	0.830941	-0.391837	-0.083509	-0.455605	0.084218	0.308582	0.083509	-0.099463	0.493985	0.059191	-0.169955	-0.82114	0.655525	0.137605	-0.059191	-1.39027	-0.746723	0.700419	0.167018	0.356142	0.16154	0.078414	0.110764	-0.569132
3	PF14_0238||PF3D7_1425800||conserved Plasmodium protein, unknown function	-0.449425	-0.320046	0.893935	0.776156	0.010772	-0.010772	-0.209277	0.302205	-0.739293	-0.681488	1.15209	0.578128	-0.216224	-0.462465	0.758351	0.216224	0.460197	0.309274	-1.10321	-0.473951	0.523069	0.219023	-0.39374	-0.361904
3	PF14_0506a||PF3D7_1453300||conserved protein, unknown function	0.072546	0.512529	0.895481	-0.099192	-0.072546	-0.312456	-0.281006	0.091139	-0.073745	0.073745	0.293114	-0.816787	-0.415596	0.517928	0.265544	-0.312501	-0.145092	-0.824985	-1.17649	0.190331	-0.341851	0.444183	-0.02757	0.504286
3	PFI0190w||PF3D7_0903900||60S ribosomal protein L32, putative	1.44535	1.20063	0.870608	-0.201121	-0.586448	0.201121	-0.354178	-1.08577	0.13024	0.297227	-0.499746	-1.46564	-0.13024	0.608317	0.148084	-2.24455	-2.0318	-0.999511	-1.22479	-0.884649	-0.26048	0.31109	0.64783	-0.778913
3	MAL7P1.154a||PF3D7_0728500||conserved Plasmodium protein, unknown function	0.07697	-0.097216	0.51595	0.491773	-0.07697	-0.698533	-0.518125	0.138648	0.098684	-0.01107	-0.138392	0.01107	0.251941	0.220696	-0.134832	-0.137891	-0.15394	-0.601317	-1.03408	-0.353125	0.153257	0.231766	0.00356	-0.148961
3	PFD0700c||PF3D7_0414500||RNA binding protein, putative	1.0936	0.339031	-1.34126	-0.618924	0.255494	-0.08731	-0.613109	0.08731	1.39845	0.598568	-0.840978	-0.598568	1.25937	0.753726	-0.733456	-0.755333	-0.838108	-0.426341	0.728148	0.706234	-0.139074	0.155158	0.107522	-0.156765
3	PF11_0297||PF3D7_1128600||NOT family protein, putative	0.422263	-0.00691	-0.474143	-0.189192	0.480132	0.00691	-0.258385	0.424992	1.11114	0.182307	-0.297976	-0.287998	1.12637	0.197232	-0.182307	-0.490084	0.057869	0.01382	0.215758	0.614184	0.015229	0.014925	0.115669	-0.202086
3	PF14_0210||PF3D7_1421800||conserved Plasmodium protein, unknown function	0.807895	0.007899	-0.489293	-0.007899	0.394532	-0.317069	-0.129067	0.158357	0.201778	0.127842	-0.417361	0.187678	0.229751	-0.127842	-0.397194	-0.359993	-0.413363	-0.324968	0.360226	0.166256	0.027973	-0.255684	0.020167	-0.547671
3	PFC0176c||PF3D7_0303900||conserved Plasmodium protein, unknown function	0.602837	-0.01604	-0.165846	0.01604	0.554186	-0.094605	-0.280099	0.186771	0.449145	0.252209	-0.007348	-0.265046	-0.021402	0.480495	-0.32751	0.007348	-0.048651	-0.078565	-0.114253	0.170731	-0.470547	0.228286	-0.320162	0.272394
3	PF11_0382||PF3D7_1137100||mitochondrial ribosomal protein S9 precursor, putative	0.418939	0.227791	0.337708	-0.659007	-0.152288	-0.216571	-0.451801	0.152288	-0.401377	0.274547	-0.173328	-1.3556	0.173328	0.752967	0.730539	-1.06431	-0.571227	-0.444362	-0.789509	0.811295	0.574705	0.47842	0.903867	0.291293
3	PFL2515c||PF3D7_1252300||conserved Plasmodium protein, unknown function	0.429203	0.831444	-1.20075	-0.923828	0.282375	0.244402	-0.303384	-0.244402	0.719619	0.495302	-1.40148	-0.492682	0.492682	0.618813	-0.791309	-0.993768	-0.146828	-0.587042	0.897368	0.679426	-0.226937	0.123511	0.610173	-0.501086
3	PF08_0059||PF3D7_0817500||protein kinase c inhibitor-like protein, putative	0.232548	-0.357932	0.670802	-0.18812	0.18812	-0.282969	-0.359365	0.332055	-0.358998	0.226379	0.810901	-0.226379	-0.354405	0.438964	1.03664	-0.505111	-0.044428	0.074963	-1.03017	0.520175	0.004593	0.212585	0.225736	-0.278732
3	PFB0255w-a||PF3D7_0205700||conserved Plasmodium protein, unknown function	0.406358	0.982729	0.231103	0.046225	-0.251283	-0.046225	-0.636247	-0.500963	0.640184	-0.184793	-0.955401	-1.05082	0.755712	0.722917	0.184793	-0.74239	-0.657641	-1.02895	-0.86735	-0.547188	0.115528	0.90771	1.14019	0.308426
3	MAL8P1.12||PF3D7_0828700||conserved Plasmodium protein, unknown function	-0.409574	0.022014	1.27268	1.19434	-0.022014	-0.640537	-0.392963	0.331992	-0.189798	-0.238768	-0.324944	1.41717	0.769885	-0.5567	0.189798	1.11477	0.38756	-0.662551	-1.66565	-0.862349	0.959683	-0.317932	0.514742	-0.302398
3	PF10_0370||PF3D7_1037700||enhancer of rudimentary homolog, putative	0.788026	1.09334	0.204012	-0.54696	-0.104688	0.104688	-0.514429	-0.443647	0.954958	0.360592	-0.491148	-1.1513	0.801873	0.911524	-0.360592	-1.09484	-0.892714	-0.988648	-0.718441	0.103313	-0.153085	0.550932	0.130556	0.056466
3	PF14_0162||PF3D7_1416400||conserved Plasmodium protein, unknown function	0.526501	0.279034	-1.03331	0.069651	-0.069651	-0.573547	-0.788253	0.089198	0.590249	-0.053892	-1.11543	0.079976	0.718682	0.053892	-0.862375	-0.224429	-0.596152	-0.852581	0.245056	0.019547	0.128433	0.107784	0.253055	-0.304405
3	PF10_0303||PF3D7_1031000||25 kDa ookinete surface antigen precursor	0.330066	-0.1235	-0.30782	-0.83688	2.26268	0.776593	-0.599598	0.123499	0.125898	-0.125898	-0.738272	0.384801	-0.242255	0.185896	-0.747594	0.13248	1.93262	0.900093	-0.291778	0.960379	-0.368153	0.311794	-0.009322	-0.252321
3	MAL13P1.132||PF3D7_1324200||micro-fibrillar-associated protein, putative	0.099146	-0.665785	0.190436	-0.342219	-0.140684	0.033356	-0.033356	0.195345	0.199406	-0.014418	-0.005951	-0.751334	0.163491	0.005951	0.253595	-1.3307	-0.23983	0.699141	-0.223792	0.537564	-0.035915	0.020369	0.259546	-0.579369
3	PFL2360w||PF3D7_1249200||conserved Plasmodium protein, unknown function	-0.037399	-0.143405	0.557536	0.037399	0.12801	-0.121247	-0.393178	0.499296	-0.252532	0.139962	0.580749	-0.084571	-0.340052	-0.101312	0.366782	0.084571	0.165409	0.022158	-0.950714	0.461897	-0.08752	-0.241274	-0.213967	0.169142
3	PFD0480w||PF3D7_0409700||conserved Plasmodium protein, unknown function	0.056998	0.331182	1.03546	0.8627	-0.139792	-0.561073	-0.753461	-0.056998	-0.841338	-0.088552	0.316313	0.499283	-0.621015	-0.15016	0.299537	0.088552	-0.19679	-0.892255	-1.78892	-0.919698	0.220323	-0.061608	-0.016776	-0.410731
3	PF14_0600||PF3D7_1463000||conserved Plasmodium protein, unknown function	0.080302	0.041115	0.098215	-0.136936	-0.041115	0.236424	-0.179561	-0.512712	-0.163305	0.163305	0.517417	-0.344619	-0.316681	0.473644	0.413446	-0.249002	-0.121417	0.195309	-0.277776	-0.375776	-0.153376	0.310339	-0.103971	0.095617
3	PFL1560c||PF3D7_1232400||conserved protein, unknown function	0.027801	-0.027801	-0.058803	0.256314	0.041677	0.113601	-0.289204	-0.555069	0.499515	0.003802	-0.304508	0.29082	0.477903	-0.003802	-0.203964	-0.430157	0.013876	0.141402	-0.230401	-0.811383	-0.021612	-0.007604	0.100544	-0.720977
3	PF13TR009||PF3D7_1370800||product unspecified	0.011557	-0.05918	0.606095	0.81227	0.056764	-0.101191	-0.31853	-0.011557	-0.094135	0.094135	0.185417	-0.619308	-0.75082	1.05222	0.334027	-1.09164	0.045207	-0.042011	-0.924625	-0.823827	-0.656685	0.958082	0.14861	-0.472331
3	PF11_0135||PF3D7_1112900||conserved Plasmodium protein, unknown function	-0.916591	0.210569	0.818767	0.988641	-0.210569	-0.35571	-0.292095	0.409871	0.067245	-0.338822	-0.262524	1.59581	0.390676	-0.067245	-0.142285	1.31428	0.706022	-0.566279	-1.11086	-0.57877	0.323431	0.271577	0.120239	-0.281529
3	PF11_0050||PF3D7_1103900||conserved Plasmodium protein, unknown function	-0.211922	0.469906	-0.160624	0.826226	0.160624	0.198165	-0.965063	-0.320764	0.107402	-0.309713	-0.317616	1.78045	0.043256	-0.043256	-0.562204	1.49859	0.372546	-0.271741	-0.804439	-1.14699	-0.064146	0.266457	-0.244588	-0.281859
3	PF10_0164||PF3D7_1016900||early transcribed membrane protein 10.3	0.23565	0.820126	-0.11524	0.000912	-0.000912	0.075448	-0.119045	-0.281828	0.758801	-0.088773	-0.358188	-0.041355	0.649178	0.120752	0.041355	-0.491776	-0.236562	-0.744678	-0.003805	-0.28274	-0.109623	0.209525	0.399543	-0.450421
3	PFE1590w||PF3D7_0532100||early transcribed membrane protein 5	1.12844	1.06452	-0.257862	-0.708008	0.09402	0.060125	-0.332839	-0.060125	0.071079	1.13334	-0.071079	-0.723875	-0.326251	1.88702	0.602475	-1.09882	-1.03442	-1.00439	-0.074977	0.647883	-0.39733	0.753679	0.673554	-0.374944
3	PFA0700c||PF3D7_0114500||Plasmodium exported protein (hyp10), unknown function	2.87545	0.431839	-0.092294	-0.822523	-0.50939	0.940607	0.092294	-0.284876	0.096163	2.76283	-0.794651	-1.15786	0.361983	3.22513	-0.096163	-1.34163	-3.38484	0.508768	0.184588	0.537647	0.26582	0.462303	0.698488	-0.183772
3	PFD0310w||PF3D7_0406200||sexual stage-specific protein precursor (Pfs16)	1.04902	1.96199	0.440344	-0.231593	1.23159	-0.356084	-0.652886	-0.292301	1.15385	0.106436	-0.311798	-0.106436	1.34456	0.779683	-0.182893	-0.820991	0.182574	-2.31808	-1.09323	-0.060708	0.190716	0.673247	0.128905	-0.714555
3	PFE1315w||PF3D7_0526400||conserved Plasmodium protein, unknown function	-0.717813	0.134744	1.1558	0.670601	-0.016167	-0.678418	-0.842437	0.016167	-0.894005	-0.554823	0.666701	0.587478	-1.12171	-0.56291	0.554823	0.568112	0.701646	-0.813162	-1.99824	-0.654434	-0.227703	-0.008087	-0.111878	-0.019366
3	PF14_0272||PF3D7_1429300||CPW-WPC family protein	0.938294	0.515927	-0.334113	-0.14399	0.14399	-0.267744	-1.03117	0.246424	1.01215	0.213887	-0.346134	-0.213887	0.795407	0.454803	-0.338204	-0.27033	-0.794304	-0.783671	-0.697056	0.390414	-0.216738	0.240916	0.00793	-0.056443
3	PF11_0455a||PF3D7_1144300||conserved Plasmodium protein, unknown function	1.20787	1.04434	1.32501	-0.072251	-0.560485	0.050538	-0.050538	-1.38272	0.148797	0.46093	-0.148797	-1.24234	-0.212803	0.869799	0.73622	-1.37806	-1.76835	-0.993797	-1.37555	-1.31047	-0.3616	0.408869	0.885017	-0.135716
3	PF14_0031b||PF3D7_1403200||conserved Plasmodium protein, unknown function	1.21562	0.844584	-0.219264	0.008847	-0.008847	-0.100518	-0.116677	0.389273	0.368292	0.313369	-0.686533	-0.555077	0.449698	0.237335	-0.424862	-0.237335	-1.22447	-0.945102	0.102587	0.380426	0.081406	-0.076034	0.261671	0.317742
3	PFL1595w||PF3D7_1233100||conserved protein, unknown function	0.471764	-0.410769	0.498794	0.17093	-0.418472	0.035345	-0.035345	-0.262559	0.060616	0.259439	-0.060616	-0.732835	-0.095636	0.105362	0.210537	-0.989699	-0.890236	0.446114	-0.534139	-0.433489	-0.156252	-0.154077	0.271153	-0.256864
3	PF07_0100||PF3D7_0723700||conserved Plasmodium protein, unknown function	0.162171	-0.649667	0.569704	-0.116982	0.116982	-0.134437	-0.358307	0.409246	-0.084732	0.304714	0.57813	-0.554174	-0.448343	0.370146	0.084732	-1.06476	-0.045189	0.51523	-0.928011	0.526228	-0.363611	0.065432	-0.493398	-0.510586
3	PFL1015w-a||PF3D7_1221100||conserved Plasmodium protein, unknown function	0.506958	0.00102	0.140296	-0.00102	-0.10521	-0.689242	-0.553655	0.017908	0.128375	-0.048526	0.159037	-0.132088	0.134723	0.048526	-0.193821	-0.315465	-0.612168	-0.690262	-0.693951	0.018928	0.006348	0.097052	-0.352858	-0.183377
3	PF10_0331||PF3D7_1034000||Sec1 family protein, putative	-0.012322	-0.075659	0.554025	0.012322	0.322867	-0.057982	-0.619334	0.123046	-0.021346	0.095894	0.496719	-0.265067	-0.232833	0.021346	0.362665	-0.199662	0.335189	0.017677	-1.17336	0.110724	-0.211487	-0.074548	-0.134054	0.065405
3	PF14_0751||PF3D7_1477900||acyl-CoA synthetase	0.03943	1.62718	-0.433516	0.345127	0.243244	-0.43386	-1.06498	-0.03943	-0.000816	0.214271	-0.821725	0.238496	0.000816	0.11623	-0.522464	-0.054676	0.203814	-2.06103	-0.631461	-0.384557	0.001632	-0.098041	0.299261	-0.293172
3	PF11_0262||PF3D7_1125100||vacuolar membrane protein-related, putative	-0.233107	-0.210492	0.964754	0.28245	0.262652	-0.325456	0.169729	-0.169729	-0.287138	-0.243426	1.22858	0.157431	-0.574332	-0.104519	1.03706	0.104519	0.495759	-0.114964	-0.795025	-0.452179	-0.287194	0.138907	-0.191518	-0.052912
3	PFD0395c||PF3D7_0408000||conserved Plasmodium protein, unknown function	-0.758911	2.13184	0.434906	2.47748	-0.044441	-0.365376	-0.36507	0.044441	0.566883	-1.40794	-1.24133	2.206	0.870765	-1.22038	-0.566883	1.83327	0.71447	-2.49722	-0.799976	-2.43304	0.303882	0.187553	0.674442	-0.372734
3	PF08_tmp2||PF3D7_0801200||product unspecified	-0.227897	0.551359	0.67283	-0.621861	-0.259634	0.737872	0.227897	-1.7231	0.169173	-0.169173	1.44383	-0.698677	-0.584571	0.419467	1.09196	-1.34179	-0.031737	0.186513	-0.444933	-1.10124	-0.753744	0.58864	-0.351879	-0.643108
3	PF10_0100||PF3D7_1010300||conserved Plasmodium protein, unknown function	-1.25834	0.930849	0.602824	1.16728	0.076997	-0.076997	-0.567604	-0.307361	0.731482	-1.33037	-0.779407	1.31391	0.529899	-1.161	-0.529899	0.539681	1.33534	-1.00785	-1.17043	-1.47464	-0.201583	0.169364	0.249508	-0.774233
3	PF07_0083||PF3D7_0720100||small subunit rRNA processing protein, putative	-0.039547	0.18155	0.131032	-0.222804	0.039547	-0.075248	-0.356469	0.160637	0.100936	0.156065	-0.61194	-0.762161	0.512209	0.316859	-0.100936	-1.08526	0.079094	-0.256798	-0.487501	0.383441	0.411273	0.160794	0.511004	-0.323097
3	PF13TR010||PF3D7_1370900||product unspecified	0.241896	0.457689	1.01626	0.874372	-0.347248	-0.952892	-1.40654	-0.241896	-0.542229	0.201563	0.730241	-0.727083	-0.201563	0.597982	0.749355	-0.927866	-0.589144	-1.41058	-2.4228	-1.11627	0.340666	0.396419	0.019114	-0.200783
3	PF13_0190||PF3D7_1334200||conserved Plasmodium protein, unknown function	1.23517	0.419951	-0.067257	-0.812436	-0.03129	0.333977	0.03129	-0.382565	0.305982	0.681298	-0.254676	-1.38223	0.053634	0.754632	-0.053634	-1.47807	-1.26646	-0.085974	0.098547	0.429871	-0.252348	0.073334	0.201042	-0.095839
3	PF10_0257||PF3D7_1026000||conserved Plasmodium protein, unknown function	0.910492	-0.204819	0.024479	-0.373604	-0.024479	0.455431	0.179671	-0.214851	0.237095	0.411512	-0.411575	-0.99967	0.285818	0.447322	-0.237095	-1.32984	-0.934971	0.66025	0.155192	0.158753	0.048723	0.03581	0.17448	-0.330174
3	PF14_0513||PF3D7_1454000||RNA binding protein, putative	0.306641	0.667167	0.585918	0.434504	-0.494576	-0.306641	-0.524459	-0.559886	0.0641	0.029067	-0.475698	-0.65191	-0.000428	0.093195	0.000428	-1.24539	-0.801217	-0.973808	-1.11038	-0.99439	-0.064528	0.064128	0.476126	-0.59348
3	PF11_0039||PF3D7_1102700||early transcribed membrane protein 11.1	-0.117057	1.95699	-1.82084	0.337508	0.117057	0.35244	-0.513578	-1.70831	1.69149	-0.359623	-2.57279	0.588475	1.38294	0.024326	-2.28318	-0.024326	0.234114	-1.60455	1.30726	-2.04582	-0.308547	0.383949	0.289606	-0.612801
3	PFI0515w||PF3D7_0910600||SNARE protein, putative	-0.194924	0.864277	0.420744	1.23446	-0.055792	-0.720165	-0.970174	0.055792	-0.032755	0.032755	-0.24944	0.75058	-0.384246	0.082008	-0.066098	0.75402	0.139132	-1.58444	-1.39092	-1.17866	-0.351491	0.049253	0.183342	0.00344
3	PFB0650w||PF3D7_0214300||conserved Plasmodium protein, unknown function	0.432465	0.310986	-0.472323	-0.017942	0.017942	-0.6493	-0.79587	0.09667	0.475378	0.114153	-0.329733	0.082177	0.607651	-0.082177	-0.301376	-0.295319	-0.414523	-0.960286	-0.323547	0.114612	0.132273	-0.19633	0.028357	-0.377496
3	PF10_0277||PF3D7_1028300||nucleolar preribosomal assembly protein, putative	0.900684	0.79734	-0.004772	-0.005816	-0.294171	0.460527	0.004772	-0.748333	0.763876	0.533669	-0.833059	-1.06824	0.756806	0.508993	-0.508993	-1.74921	-1.19486	-0.336813	0.009544	-0.742517	-0.00707	-0.024676	0.324066	-0.680973
3	PF14_0644||PF3D7_1467600||conserved Plasmodium protein, unknown function	0.175777	0.352629	-0.20641	-0.03911	0.010968	0.333329	-0.169281	-0.010968	0.661439	0.401061	-0.194224	-0.318536	0.712211	0.194224	-0.247682	-0.478118	-0.164809	-0.0193	0.037129	0.028142	0.050772	-0.206837	-0.053458	-0.159582
3	PF13_0269||PF3D7_1351600||glycerol kinase, putative	0.897123	0.47771	-0.53703	0.345323	0.00943	-0.403885	-0.515114	-0.00943	0.24124	-0.389555	-0.351154	0.634846	0.200932	-0.200932	-0.328859	0.694862	-0.887693	-0.881595	0.021916	-0.354753	-0.040308	0.188623	0.022295	0.060016
3	PFF0405c||PF3D7_0608200||conserved Plasmodium protein, unknown function	0.420428	-0.020145	0.525962	-0.438483	-0.07517	-0.28809	0.020145	0.462029	-0.327659	0.798231	0.327659	-0.804173	-0.550898	0.691587	0.646561	-0.792533	-0.495598	-0.267945	-0.505817	0.900512	-0.223239	-0.106644	0.318902	0.01164
3	PF07_0045||PF3D7_0710800||conserved Plasmodium protein, unknown function	-0.033406	-0.187739	0.16796	-0.296251	0.042078	0.033406	-0.1219	0.406634	0.28369	-0.003023	0.023425	-0.932025	0.235031	0.003023	-0.0424	-0.92768	0.075484	0.221145	-0.28986	0.702885	-0.048659	0.006046	-0.065825	0.004345
3	PF13_0247||PF3D7_1346700||6-cysteine protein	2.37896	0.969369	-0.697415	0.228195	-0.103225	-0.54188	-0.893058	0.103225	0.969173	0.326203	-0.655026	-0.326203	0.903873	0.878157	-0.579843	-0.47158	-2.48218	-1.51125	-0.195643	-0.12497	-0.0653	0.551954	0.075183	-0.145377
3	PF13_0171||PF3D7_1331800||60S ribosomal protein L23, putative	0.831461	0.669633	0.006547	-1.04791	-0.006547	0.306346	-0.237816	-1.03071	0.073815	0.276491	-0.073815	-1.35749	-0.172355	0.797809	0.268174	-1.67327	-0.838008	-0.363287	-0.244363	0.017194	-0.24617	0.521318	0.341989	-0.31578
3	PF14_0752||PF3D7_1478000||Plasmodium exported protein (PHISTa), unknown function	1.78585	3.70619	-0.581371	2.13706	0.093911	-0.093911	-0.810825	-1.28387	2.46322	0.073905	-2.29175	-0.073905	1.99842	0.410277	-2.36765	-0.914784	-1.69194	-3.8001	-0.229454	-3.42093	-0.464801	0.336372	-0.0759	-0.840879
3	PF08_0074||PF3D7_0814200||DNA/RNA-binding protein Alba, putative	0.83236	0.380412	0.139033	-0.670291	-0.070125	0.070125	-0.409097	-0.561826	-0.151255	-0.040247	0.169036	-1.32061	0.040247	0.04805	0.428182	-2.00514	-0.902485	-0.310287	-0.54813	0.108465	0.191502	0.088297	0.259146	-0.684533
3	PFE1055c||PF3D7_0521000||conserved Plasmodium protein, unknown function	0.939232	-0.239017	0.085679	-0.401125	-0.085679	0.322831	0.225264	-0.389635	0.01674	0.471004	-0.28656	-1.35439	0.211535	0.149407	-0.01674	-1.855	-1.02491	0.561848	0.139585	0.01149	0.194795	-0.321597	0.26982	-0.50061
3	PF10_0080a||PF3D7_1008300||product unspecified	-0.836137	-0.013257	1.11194	0.773994	-0.268617	-0.333388	0.013257	0.089001	-0.302367	-0.324952	0.302367	0.822412	-0.452446	-0.548922	0.74795	0.783699	0.56752	-0.320131	-1.09868	-0.684993	-0.150079	-0.22397	0.445583	-0.038713
3	PFL0785c||PF3D7_1216300||signal recognition particle SRP19	0.043571	-0.043571	0.199786	-0.077194	-0.168116	0.517598	0.235929	-0.175448	0.619221	-0.034376	-0.296106	-0.721767	0.3669	0.122457	0.034376	-1.42733	-0.211687	0.561169	0.036143	-0.098254	-0.252321	0.156833	0.330482	-0.705563
3	PFF0545c||PF3D7_0611100||conserved Plasmodium protein, unknown function	-0.976401	-0.286143	1.49202	0.587228	-0.41544	-0.128467	0.716249	0.128467	-0.935484	-0.490518	1.37608	0.360813	-1.15334	-0.360813	1.17174	0.382848	0.560961	0.157676	-0.775773	-0.458761	-0.217856	0.129705	-0.204337	0.022035
3	PF14_0656||PF3D7_1468800||U2 snRNP auxiliary factor, putative	0.251607	-0.575786	0.780537	-0.23748	-0.666515	0.23748	0.349324	-0.528448	0.259176	-0.236688	-0.421229	-1.20153	0.857437	0.236688	0.502377	-1.13107	-0.918122	0.813266	-0.431213	-0.290968	0.598261	0.473376	0.923606	0.070461
3	PF10_0067||PF3D7_1006700||conserved Plasmodium protein, unknown function	1.13297	0.685008	-0.099734	-0.357076	-0.174283	0.266884	0.099734	-0.982052	0.958994	0.570436	-0.612241	-0.740115	0.664656	0.392914	-0.392914	-0.989785	-1.30725	-0.418124	0.199468	-0.624976	-0.294338	-0.177522	0.219327	-0.24967
3	PFB0725c||PF3D7_0215900||zinc finger protein, putative	-0.635606	0.62012	1.56241	0.902654	-0.298556	-0.993516	-0.702195	0.298556	-1.27363	-0.902745	0.781171	0.534332	-1.5353	-0.534332	0.597665	0.662348	0.33705	-1.61364	-2.26461	-0.604098	-0.261678	0.368413	-0.183506	0.128016
3	PFE0725c||PF3D7_0514500||conserved Plasmodium membrane protein, unknown function	0.91398	-0.155305	-0.536987	-0.543735	-0.402682	0.155305	0.160117	0.459661	0.06572	0.255258	-0.317046	-0.687431	0.038384	0.649375	-0.444457	-0.038384	-1.31666	0.31061	0.697104	1.0034	-0.027336	0.394117	-0.127411	0.649047
3	PFL1350w||PF3D7_1227900||RNA pseudouridylate synthase, putative	0.952641	0.356442	-0.149168	-0.676377	0.018225	0.008976	-0.42004	-0.008976	0.535238	0.80464	-0.30767	-1.00636	0.200254	0.731309	-0.200254	-1.18758	-0.934416	-0.347466	-0.270872	0.667401	-0.334984	-0.073331	0.107416	-0.181224
3	PF11_0119||PF3D7_1111300||SNARE protein, putative	0.215267	0.798909	1.07172	0.053755	-0.16308	-0.210801	-0.101281	-0.053755	-0.176842	0.176842	0.727717	-0.185328	-0.367936	0.224871	0.44843	-0.207919	-0.378347	-1.00971	-1.173	-0.10751	-0.191094	0.048029	-0.279287	-0.022591
3	PFD1007w||PF3D7_0421900||conserved Plasmodium protein, unknown function	0.751725	0.892758	-0.859081	0.556512	0.029685	-0.447078	-0.469672	-0.029685	0.44863	-0.44863	-1.36685	1.60404	0.533481	-0.466353	-0.900581	1.41309	-0.72204	-1.33984	0.389409	-0.586197	0.084851	-0.017723	0.46627	-0.190943
3	PF10_0323||PF3D7_1033200||early transcribed membrane protein 10.2	0.101894	0.5024	0.547374	0.083054	-0.083054	-0.142133	-0.841831	-0.417946	-0.326089	0.326089	0.343914	-0.393718	-0.542982	0.463597	0.604895	-0.888137	-0.184948	-0.644533	-1.38921	-0.501	-0.216893	0.137508	0.260981	-0.494419
3	PFL1600c||PF3D7_1233200||conserved Plasmodium protein, unknown function	0.446324	0.152272	0.249302	0.417004	-0.306633	-0.851446	-1.17523	-0.152272	0.47002	0.078887	-0.515084	0.181861	0.992612	-0.078887	-0.682901	-0.176962	-0.752957	-1.00372	-1.42453	-0.569276	0.522592	-0.157774	-0.167817	-0.358823
3	PFL1875w||PF3D7_1238700||conserved Plasmodium protein, unknown function	0.205633	0.000114	0.539646	0.529607	-0.190359	-0.423156	-0.282143	-0.000114	-0.820998	0.06638	0.121889	0.108579	-0.865732	-0.194103	0.287067	-0.06638	-0.395992	-0.42327	-0.821789	-0.529721	-0.044734	-0.260483	0.165178	-0.174959
3	PFL0155c||PF3D7_1203100||conserved Plasmodium protein, unknown function	0.508451	0.031069	0.052846	-0.031069	-0.097559	-0.347573	-0.420103	0.185773	0.727446	0.408096	-0.253858	-0.357672	0.863337	0.064072	-0.064072	-1.16641	-0.60601	-0.378642	-0.472949	0.216842	0.135891	-0.344024	0.189786	-0.808734
3	PF10_0355||PF3D7_1036300||merozoite surface protein	-0.864562	2.54007	1.81041	3.02412	0.002454	-0.401318	-1.25335	-0.002454	0.023421	-0.082953	-1.28456	2.4422	0.625221	-0.023421	-0.592314	1.73982	0.867016	-2.94139	-3.06377	-3.02657	0.6018	0.059532	0.692242	-0.702381
3	MAL8P1.380||PF3D7_0812800||conserved Plasmodium protein, unknown function	0.065148	1.41653	1.67552	0.942165	-0.065148	-0.51412	-0.544698	-0.168754	0.297046	0.023567	-0.023567	-0.295992	-0.891325	0.166766	0.350067	-0.144253	-0.130296	-1.93065	-2.22022	-1.11092	-1.18837	0.143199	0.373634	0.151739
3	PF11_0100||PF3D7_1108800||conserved Plasmodium protein, unknown function	0.386872	0.096305	0.034705	-0.034705	-0.301418	-0.384962	-0.47683	0.142243	0.159192	0.321971	-0.295928	-0.499916	0.253174	0.49604	-0.159192	-0.653859	-0.68829	-0.481267	-0.511535	0.176948	0.093982	0.174069	0.136736	-0.153943
3	PFD0400w||PF3D7_0408100||conserved Plasmodium protein, unknown function	0.111362	0.49187	0.607002	0.88931	-0.111362	-0.128032	-0.331574	-0.165377	0.402948	-0.056456	-0.096726	0.91385	0.998015	-0.267603	-0.149994	0.056456	-0.222724	-0.619902	-0.938576	-1.05469	0.595067	-0.211147	-0.053268	-0.857394
3	MAL8P1.72||PF3D7_0817900||high mobility group protein	0.512402	2.00038	3.08168	2.14396	-0.823613	-1.14806	-0.857189	-0.512402	-0.271834	-0.20283	0.922092	0.619084	-0.604177	-0.064174	1.05636	0.064174	-1.33602	-3.14843	-3.93887	-2.65637	-0.332343	0.138656	0.13427	-0.55491
3	PFC0381c||PF3D7_0309100||conserved Plasmodium protein, unknown function	0.913091	-0.37929	-0.076279	-0.072761	-0.184474	0.077085	0.072761	0.253255	0.602198	0.153625	-0.406216	-0.297096	0.414314	0.251338	-0.46842	-0.153625	-1.09756	0.456375	0.14904	0.326016	-0.187884	0.097713	-0.062204	0.143471
3	PF10_0171||PF3D7_1017600||conserved Plasmodium protein, unknown function	0.854394	0.555443	0.197829	-0.141148	-0.473855	0.141148	-0.219899	-0.602109	0.246037	0.398205	-0.395225	-0.246037	1.21277	0.287603	-0.411381	-0.774129	-1.32825	-0.414295	-0.417728	-0.460961	0.966728	-0.110602	-0.016156	-0.528092
3	PF07_0030||PF3D7_0708500||heat shock protein 86 family protein	0.717744	0.079898	-0.079898	-0.398911	-0.280596	0.148936	0.621159	-0.318798	0.520008	0.221401	-0.914773	-1.1038	0.530372	0.190219	-0.190219	-1.6899	-0.99834	0.069038	0.701057	0.080113	0.010364	-0.031182	0.724554	-0.586101
3	PF14_0588||PF3D7_1461800||conserved Plasmodium protein, unknown function	1.97873	1.6272	-0.130893	0.847988	-0.079483	-0.634417	-0.698637	0.079483	0.927142	0.309532	-0.969711	-0.120301	0.88224	0.120301	-0.807285	-0.587753	-2.05822	-2.26162	-0.567744	-0.768505	-0.044902	-0.189231	0.162426	-0.467452
3	PFC1060c||PF3D7_0323700||conserved Plasmodium protein, unknown function	0.434894	-0.063262	0.516989	0.472693	-0.725895	0.034873	-0.034873	-0.25494	0.053972	-0.052253	-0.13355	0.184002	0.641597	-0.278096	0.052253	-0.589198	-1.16079	0.098135	-0.551862	-0.727633	0.587625	-0.225843	0.185803	-0.7732
3	PFA0575c||PF3D7_0111900||conserved Plasmodium protein, unknown function	0.495332	0.604952	1.39697	0.432311	-1.11303	-1.03536	-0.432311	-0.800027	-0.210163	0.37601	0.839057	-0.537439	-0.378717	0.210163	0.93717	-0.406739	-1.60836	-1.64031	-1.82928	-1.23234	-0.168554	-0.165847	0.098113	0.1307
3	PF13_0266||PF3D7_1350800||conserved Plasmodium protein, unknown function	1.09762	0.198289	1.07398	0.790941	-0.628574	-1.43343	-1.42139	-0.198289	0.123515	-0.248493	-0.21968	0.450539	-0.024769	-0.02874	0.024769	0.51789	-1.72619	-1.63172	-2.49538	-0.98923	-0.148284	0.219753	0.244449	0.067351
3	PFD0150w||PF3D7_0403200||conserved Plasmodium protein, unknown function	0.942304	-0.381747	0.134254	-0.323333	-0.488574	0.263096	0.115917	-0.115917	0.234832	0.193588	-0.441796	-1.01384	0.468582	0.115873	-0.115873	-1.56445	-1.43088	0.644843	-0.018337	0.207416	0.23375	-0.077715	0.325923	-0.550613
3	PFF0835w||PF3D7_0617200||conserved Plasmodium protein, unknown function	0.612726	-0.077653	0.436271	-0.259415	-0.399332	0.366057	0.077653	-0.751853	0.073536	0.161221	-0.196726	-0.935364	0.443528	0.075553	-0.073536	-1.60542	-1.01206	0.44371	-0.358618	-0.492438	0.369992	-0.085668	0.12319	-0.670059
3	PFL0990w||PF3D7_1220600||conserved Plasmodium protein, unknown function	0.485854	0.483466	0.975814	0.013439	-0.303008	-0.555692	-0.192509	-0.013439	-0.185388	0.185388	0.589285	-0.667767	-0.753053	0.461804	0.468221	-0.512983	-0.788862	-1.03916	-1.16832	-0.026878	-0.567665	0.276416	-0.121064	0.154784
3	PF14_0579||PF3D7_1460700||60S ribosomal protein L27, putative	1.64558	1.72491	1.02086	-0.152659	-0.977108	0.152659	-0.379997	-2.02599	0.425965	0.129953	-0.716591	-1.93201	-0.000466	0.675228	0.000466	-2.57274	-2.62269	-1.57225	-1.40086	-1.87333	-0.426431	0.545275	0.717057	-0.640733
3	PF07_0109a||PF3D7_0726800||conserved Plasmodium protein, unknown function	0.369799	0.055283	0.64184	-0.594078	-0.351886	-0.195265	-0.004352	0.004352	-0.644833	0.454924	0.412599	-0.880129	-0.985408	0.758743	0.506777	-0.412599	-0.721685	-0.250548	-0.646192	0.59843	-0.340575	0.303819	0.094178	0.46753
3	PF14_0190||PF3D7_1419600||conserved Plasmodium protein, unknown function	0.176696	0.844685	0.727808	1.02867	-0.498361	-0.510813	-0.637935	-0.176696	-0.032334	-0.213155	-0.240403	0.46825	0.241932	-0.217888	0.032334	0.11288	-0.675057	-1.3555	-1.36574	-1.20536	0.274266	-0.004733	0.272737	-0.35537
3	PFE0935c||PF3D7_0518700||RNA binding protein Puf1	0.810293	0.919234	0.09997	-0.224611	-0.09997	-0.616988	-0.499947	0.168468	0.524216	0.39959	-0.396857	-0.76564	0.485004	0.250095	-0.250095	-0.958695	-0.910263	-1.53622	-0.599917	0.393079	-0.039212	-0.149495	0.146762	-0.193055
3	PF14_0296||PF3D7_1431700||60S ribosomal protein L14, putative	0.869323	0.828359	0.198531	-0.54574	-0.388726	0.209948	-0.198531	-0.86422	0.181556	0.530189	-0.393474	-1.75501	0.069483	0.753035	-0.069483	-2.54417	-1.25805	-0.618411	-0.397062	-0.31848	-0.112073	0.222846	0.323991	-0.789158
3	MAL13P1.313||PF3D7_1362700||conserved Plasmodium protein, unknown function	0.288436	0.099627	0.173368	0.225741	-0.593537	-0.726224	-0.433495	-0.099627	0.150486	-0.082861	0.00215	0.134701	0.176467	-0.265691	-0.00215	-0.374411	-0.881973	-0.825851	-0.606863	-0.325368	0.025981	-0.18283	-0.0043	-0.509112
3	MAL13P1.189||PF3D7_1338000||conserved Plasmodium membrane protein, unknown function	0.038737	0.6311	1.35508	0.555052	-0.427785	-0.39566	-0.082336	-0.038737	-0.847785	-0.361755	0.773675	-0.096294	-1.52336	0.096294	0.433488	0.293789	-0.466522	-1.02676	-1.43741	-0.593789	-0.67557	0.458049	-0.340187	0.390083
3	PF14_0670||PF3D7_1470300||conserved Plasmodium protein, unknown function	0.768655	0.836016	-0.005987	-0.293704	-0.240629	0.155492	0.005987	-0.815003	0.941439	0.661693	-0.872296	-0.977564	0.847471	0.455734	-0.455734	-1.36371	-1.00928	-0.680524	0.011974	-0.521299	-0.093968	-0.205959	0.416562	-0.386149
3	PFD0270c||PF3D7_0405500||conserved Plasmodium protein, unknown function	0.740725	0.998177	0.297343	-0.211434	-0.186677	-0.013375	-0.57743	0.013375	0.572694	0.517329	-0.921689	-1.18726	0.007268	0.433138	-0.007268	-1.43678	-0.927402	-1.01155	-0.874773	0.224809	-0.565426	-0.084191	0.914421	-0.249526
3	PFA0225w||PF3D7_0104400||4-hydroxy-3-methylbut-2-enyl diphosphate reductase	0.069389	-0.21856	0.523839	0.393368	-0.399643	-0.069389	0.238668	-0.229876	-0.334885	-0.013773	0.317004	0.14609	-0.447466	0.008321	0.49715	-0.008321	-0.469032	0.149171	-0.285171	-0.623244	-0.112581	0.022094	0.180146	-0.154411
3	PF10_0206||PF3D7_1021200||conserved Plasmodium protein, unknown function	-0.127198	0.053839	1.30185	0.627967	-0.351833	-0.492431	-0.053839	0.183125	-0.559793	-0.239214	0.856069	0.221614	-0.389546	-0.168073	1.2327	0.168073	-0.224635	-0.54627	-1.35569	-0.444842	0.170247	0.071141	0.376628	-0.053541
3	PF10_0190||PF3D7_1019700||conserved Plasmodium protein, unknown function	0.018888	-0.023626	1.0755	0.939828	-0.630552	-0.965119	-0.018888	0.205158	-0.489238	0.022956	0.833095	0.330172	-0.081137	-0.287645	0.791391	-0.022956	-0.64944	-0.941493	-1.09439	-0.73467	0.408101	-0.310601	-0.041704	-0.353128
3	PFL2075c||PF3D7_1243100||conserved Plasmodium protein, unknown function	0.631155	0.411357	0.652742	-0.148622	-0.281355	0.029143	-0.029143	-0.38935	0.298976	0.033053	-0.408121	-1.38312	0.338504	0.114327	-0.033053	-1.77964	-0.91251	-0.382214	-0.681885	-0.240728	0.039528	0.081274	0.375068	-0.396523
3	MAL8P1.25a||PF3D7_0825400||conserved Plasmodium protein, unknown function	0.161312	0.179463	1.14791	0.195023	-0.684899	-0.915223	-0.527939	-0.161312	-0.158543	0.018696	0.629022	-0.232068	-0.018696	0.632675	1.05513	-0.053889	-0.846211	-1.09469	-1.67585	-0.356335	0.139847	0.613979	0.426106	0.178179
3	PF14_0736||PF3D7_1476600||Plasmodium exported protein, unknown function	0.423214	1.20371	0.740104	0.591194	-0.423214	-0.841409	-0.480822	-0.546488	0.120209	0.014702	-0.014702	-0.285183	-0.024947	0.195068	0.225061	-0.182363	-0.846428	-2.04511	-1.22093	-1.13768	-0.145156	0.180366	0.239763	0.10282
3	MAL13P1.106||PF3D7_1319800||probable protein, unknown function	2.25545	1.58625	-0.039959	0.873636	-0.439393	-0.416802	-0.403199	0.039959	0.698946	0.504404	-0.538002	-1.02172	1.06208	0.549774	-0.526878	-0.504404	-2.69485	-2.00305	-0.36324	-0.833677	0.363132	0.04537	0.011124	0.517316
3	PF14_0708||PF3D7_1474000||probable protein, unknown function	1.16263	1.32689	-0.100685	0.932119	-0.120978	-0.5416	-0.669129	0.100685	0.917597	-0.031491	-1.21169	0.031491	0.930461	0.060812	-1.23859	-0.602218	-1.28361	-1.86849	-0.568444	-0.831434	0.012864	0.092303	-0.026906	-0.633709
3	PF08_0112||PF3D7_0806900||conserved Plasmodium protein, unknown function	-0.019469	0.019469	0.689494	0.102381	-0.557789	-0.401148	0.051776	-0.165548	-0.098332	0.046552	0.548898	-0.107673	-0.046552	0.093622	0.728083	-0.216083	-0.53832	-0.420617	-0.637718	-0.267929	0.05178	0.04707	0.179185	-0.10841
3	PFD0960c||PF3D7_0419800||60S ribosomal protein L7ae/L30e, putative	0.780948	0.975881	0.543704	0.390101	-0.715256	-0.463631	-0.977432	-0.390101	0.618895	0.414442	-0.593015	-0.408734	0.438747	0.298428	-0.298428	-0.469828	-1.4962	-1.43951	-1.52114	-0.780202	-0.180148	-0.116014	0.294587	-0.061094
3	PFB0160w||PF3D7_0203300||ERCC1 nucleotide excision repair protein, putative	0.248717	0.438109	1.08518	0.374607	-1.10841	-1.15417	-0.50657	-0.248717	0.064319	-0.064319	0.513723	-0.173504	-0.205637	0.291573	0.594123	-0.339438	-1.35713	-1.59228	-1.59175	-0.623324	-0.269956	0.355892	0.0804	-0.165934
3	PFL1550w||PF3D7_1232200||lipoamide dehydrogenase	0.129691	0.515897	1.3683	0.986362	-0.480243	-0.531712	-0.129691	-0.458145	-0.592332	-0.4297	0.862268	0.309687	-0.965284	-0.309687	0.789672	0.405551	-0.609934	-1.04761	-1.49799	-1.44451	-0.372952	0.120013	-0.072596	0.095864
3	MAL13P1.345||PF3D7_1368300||conserved Plasmodium protein, unknown function	0.504993	0.752468	1.04112	0.466103	-0.683893	-0.783174	-0.850367	-0.466103	-0.297573	0.0653	0.430521	-0.31394	-0.70717	0.475669	0.194654	-0.0653	-1.18889	-1.53564	-1.89148	-0.932206	-0.409597	0.410369	-0.235867	0.24864
3	PF14_0217||PF3D7_1422700||conserved Plasmodium protein, unknown function	0.814948	-0.069469	0.267018	-0.175821	-0.494176	0.069469	0.226096	-0.204373	-0.21489	0.070098	0.050065	-0.99219	-0.050065	0.115648	0.146862	-1.15335	-1.30912	0.138938	-0.040922	-0.028552	0.164825	0.04555	0.096797	-0.161163
3	Pfa_snoR_18||PF3D7_1331900||ncRNA	1.0682	1.20107	0.81728	-0.126937	-0.423717	0.126937	-0.4184	-0.595675	0.542623	0.748758	0.032362	-0.734886	-0.035921	1.04523	-0.032362	-0.692806	-1.49191	-1.07413	-1.23568	-0.468738	-0.578544	0.29647	-0.064724	0.04208
3	PFI1335w||PF3D7_0927200||conserved Plasmodium protein, unknown function	0.972241	1.32165	-0.031389	0.953536	-0.252633	-0.418198	-0.821121	0.031389	0.660045	-0.109926	-0.554938	0.650741	0.814403	-0.040543	-0.469549	0.040543	-1.22487	-1.73985	-0.789732	-0.922147	0.154358	0.069383	0.085389	-0.610198
3	PF14_0290||PF3D7_1431100||conserved Plasmodium protein, unknown function	2.17454	1.3877	-0.049476	0.820252	-0.21592	-0.440346	-0.719913	0.049476	0.591839	0.109871	-0.668193	-0.331039	0.426506	0.266904	-0.728592	-0.109871	-2.39046	-1.82804	-0.670437	-0.770776	-0.165333	0.157033	-0.060399	0.221168
3	PF13_0263||PF3D7_1350300||conserved Plasmodium protein, unknown function	0.758338	0.310551	0.574228	-0.087959	-0.56507	-0.104181	0.087959	-1.08192	0.577529	0.402238	-0.433317	-1.05319	0.570643	0.269564	-0.269564	-1.73037	-1.32341	-0.414732	-0.486269	-0.993958	-0.006886	-0.132674	0.163753	-0.677182
3	PFE0900w||PF3D7_0518000||conserved protein, unknown function	0.118054	0.395635	0.293573	-0.119933	-0.990568	-0.01672	0.01672	-1.68704	0.661098	0.19808	-0.19808	-0.360326	0.527295	0.376222	-0.266913	-0.623722	-1.10862	-0.412355	-0.276853	-1.56711	-0.133803	0.178142	-0.068833	-0.263396
3	PF11_0438||PF3D7_1142600||60S ribosomal protein L35ae, putative	1.08308	1.12903	0.708658	-0.02677	-0.739011	0.02677	-0.115448	-1.06232	0.496598	0.566342	-0.215156	-1.6836	0.103837	0.849926	-0.103837	-1.75483	-1.82209	-1.10226	-0.824106	-1.03555	-0.392761	0.283584	0.111319	-0.071236
3	PF14_0748||PF3D7_1477700||Plasmodium exported protein (PHISTa), unknown function	1.31065	0.636593	0.140391	0.0464087	-0.579836	-0.403908	-0.55988	-0.554009	1.02817	0.018644	-0.018644	0.233828	0.729261	-0.181253	-0.589949	-0.799	-1.89048	-1.0405	-0.700271	-0.600418	-0.29891	-0.199897	-0.571305	-1.03283
3	PF14_0098||PF3D7_1410000||tetratricopeptide repeat family protein, putative	1.1692	1.67585	1.13663	0.359352	-0.685188	-0.359352	-0.523985	-0.564134	0.230064	0.356138	-0.07435	-0.799436	-0.386989	0.519611	0.07435	-0.914639	-1.85439	-2.03521	-1.66061	-0.923486	-0.617053	0.163473	0.1487	-0.115203
3	PFC0465c||PF3D7_0311100||pre-mRNA splicing factor, putative	0.616456	0.031201	0.53272	-0.194485	-0.791818	-0.031201	0.289668	-0.364741	0.131571	0.045851	-0.046103	-1.0096	0.378097	-0.045851	0.240114	-1.49923	-1.40827	-0.062402	-0.243052	-0.170256	0.246526	-0.091702	0.286217	-0.489627
3	PF13TR006||PF3D7_1363900||product unspecified	0.16359	1.68466	1.96857	1.78613	-0.650449	-0.737624	-0.16359	-0.405817	0.070361	-0.517915	0.007047	-0.193913	-0.007047	-0.332317	0.088968	0.021563	-0.814039	-2.42228	-2.13216	-2.19195	-0.077408	0.185598	0.081921	0.215476
3	MAL13P1.360||PF3D7_1326700||conserved Plasmodium protein, unknown function	0.408898	1.31781	0.754709	1.17232	-0.687954	-0.524097	-0.408898	-0.620558	0.214165	-0.100637	-0.34691	0.654851	0.450756	-0.259269	-0.14538	0.100637	-1.09685	-1.84191	-1.16361	-1.79287	0.236591	-0.158632	0.20153	-0.554214
3	PF13_0014||PF3D7_1302800||40S ribosomal protein S7, putative	1.39525	1.69951	0.998079	-0.068899	-1.19785	0.068899	-0.276353	-2.11982	0.157586	0.24627	-0.419695	-1.54375	-0.091375	0.673822	0.091375	-1.71022	-2.5931	-1.63061	-1.27443	-2.05092	-0.248961	0.427552	0.51107	-0.16647
3	MAL8P1.122||PF3D7_0808300||ubiquitin regulatory protein, putative	0.732556	2.38172	1.54387	2.06803	-0.901696	-0.732556	-1.04816	-1.01337	0.807402	-0.836677	-0.649641	1.25984	0.592059	-0.358344	-0.463551	0.358344	-1.63425	-3.11427	-2.59202	-3.08139	-0.215343	0.478333	0.18609	-0.901498
3	PFA0465c||PF3D7_0109500||N-acetyltransferase, putative	0.763047	1.06724	0.850832	-0.270552	-1.03945	-0.023352	0.023352	-1.44407	-0.177968	0.338156	0.166041	-1.0121	-0.166041	0.449394	0.260381	-1.05402	-1.8025	-1.09059	-0.82748	-1.17352	0.011927	0.111238	0.09434	-0.041916
3	PF14_0205||PF3D7_1421200||40S ribosomal protein S25, putative	1.2548	1.49407	1.51093	-0.069749	-1.44633	0.069749	-0.471239	-2.21893	0.192259	0.295063	-0.169832	-1.66698	-0.305056	0.628551	0.169832	-1.79738	-2.70113	-1.42432	-1.98217	-2.14918	-0.497315	0.333488	0.339664	-0.130406
3	PFL0285w||PF3D7_1205700||targeted glyoxalase II	0.172413	-0.172413	0.789302	0.208903	-1.4967	-0.460154	0.345953	-1.05443	-0.859772	0.014288	0.183553	0.013142	-1.25382	-0.034124	0.586493	-0.013142	-1.66911	-0.287741	-0.443349	-1.26334	-0.39405	-0.048412	0.40294	-0.026284
3	PFB0455w-a||PF3D7_0210100||60S ribosomal protein L37ae, putative	1.29611	1.66112	1.06972	-0.060087	-1.7045	0.060087	-0.088805	-1.81259	0.014079	0.334319	-0.708054	-1.68116	0.069152	0.440774	-0.014079	-2.29895	-3.00061	-1.60103	-1.15852	-1.7525	0.055073	0.106455	0.693975	-0.617792
3	PF14_0635||PF3D7_1466700||large ribosomal subunit assembling protein, putative	0.727965	1.17516	0.214001	-0.292844	-0.050974	0.050974	-0.432474	-0.434735	0.945237	0.433186	-0.809647	-1.24221	0.342596	0.615591	-0.342596	-1.29598	-0.778939	-1.12418	-0.646475	-0.141891	-0.602641	0.182405	0.467051	-0.053776
3	PF10_0215a||PF3D7_1022100||conserved Plasmodium protein, unknown function	0.341027	0.867038	-0.663863	-0.556136	-0.000391	0.311384	0.000391	-0.757533	1.63018	0.668321	-0.821705	-0.791551	1.25794	0.753119	-0.668321	-0.979371	-0.341418	-0.555654	0.664254	-0.201397	-0.372245	0.084798	0.153384	-0.18782
3	PFF1450w||PF3D7_0629900||sec14-like cytosolic factor or phosphatidylinositol/phosphatidylcholine transfer protein, putative	0.427885	1.50276	0.57423	0.200793	-0.225997	-0.200793	-1.00144	-0.797268	0.88711	0.123543	-0.123543	-0.5234	0.446424	0.331568	-0.136655	-0.548328	-0.653882	-1.70355	-1.57567	-0.998061	-0.440686	0.208025	-0.013112	-0.024928
3	PFC0610c||PF3D7_0314700||zinc finger protein, putative	1.31636	0.672596	-0.127181	0.017822	0.006973	-0.280538	-0.353673	-0.006973	0.743026	0.413457	-0.574559	-0.792455	0.760841	0.259055	-0.259055	-1.30949	-1.30939	-0.953134	-0.226492	-0.024795	0.017815	-0.154402	0.315504	-0.517037
3	PFE0305w||PF3D7_0506200||transcription initiation factor TFiid, TATA-binding protein	0.729372	1.06332	0.32105	0.161512	-0.161512	-0.417359	-0.763247	-0.292785	0.819223	0.126557	-0.232519	-0.328081	0.569405	0.500667	-0.131704	-0.126557	-0.890884	-1.48067	-1.0843	-0.454297	-0.249818	0.37411	0.100815	0.201524
3	PF11_0357||PF3D7_1134600||zinc finger protein, putative	0.989443	0.494776	-0.241723	0.650235	-0.241258	-0.487283	0.041296	-0.041296	-0.03782	0.729537	0.281269	0.030145	-0.124936	0.555596	-0.030145	-0.311511	-1.2307	-0.982059	0.283019	-0.691531	-0.087116	-0.173941	-0.311414	-0.341656
3	PF11_0115||PF3D7_1110900||conserved Plasmodium protein, unknown function	0.087105	0.273158	0.176313	-0.215169	-0.444869	-0.087105	0.220093	-0.892224	0.36853	0.278162	-0.275546	-0.644153	0.305234	0.046713	-0.046713	-1.01494	-0.531974	-0.360263	0.04378	-0.677055	-0.063296	-0.231449	0.228833	-0.370791
3	PF13_0218a||PF3D7_1340200||conserved Plasmodium protein, unknown function	1.3594	1.35248	0.717094	0.177928	-0.291115	-0.177928	-0.752402	-0.361111	0.039385	0.303115	0.016815	-0.811989	-0.016815	0.353875	-0.254983	-0.554975	-1.65051	-1.5304	-1.4695	-0.539039	-0.0562	0.05076	-0.271798	0.257014
3	PFD1185w||PF3D7_0424900||Plasmodium exported protein (PHISTa), unknown function	1.96475	4.14188	-0.17847	1.63985	0.135892	-0.135892	-2.01855	-1.99609	2.48498	0.284043	-2.14398	-0.284043	2.04836	0.638516	-1.93627	-0.657687	-1.82885	-4.27777	-1.84008	-3.63595	-0.436626	0.354473	0.207709	-0.373644
3	PF08_0042||PF3D7_0821300||ATP-dependent RNA helicase prh1, putative	0.683407	0.885808	-0.160162	0.334265	-0.524026	-0.35632	0.160162	-0.603567	0.701206	-0.176649	-0.873012	0.272613	0.751244	0.13083	-0.638696	-0.13083	-1.20743	-1.24213	0.320324	-0.937832	0.050038	0.307479	0.234316	-0.403443
3	PFC0775w||PF3D7_0317600||40S ribosomal protein S11, putative	1.21904	1.21669	0.705426	-0.888474	-0.316988	0.316988	-0.476451	-0.78828	0.252091	0.248652	-0.507426	-1.96893	-0.073365	0.591472	0.073365	-2.36754	-1.53602	-0.899705	-1.18188	0.100194	-0.325456	0.34282	0.580791	-0.398611
3	PF14_0706||PF3D7_1473700||conserved Plasmodium protein, unknown function	1.90522	2.6373	-0.114234	0.368965	0.039901	-0.039901	-0.358083	-0.137724	1.80297	0.539733	-1.03708	-0.539733	1.79761	0.591478	-1.03789	-1.19576	-1.86532	-2.6772	-0.243849	-0.506689	-0.005361	0.051745	-0.000813	-0.656029
3	PF14_0213a||PF3D7_1422300||DnaJ protein, putative	0.384836	0.278126	0.372162	0.000734	-0.513046	-0.000734	-0.081403	-0.739854	0.193412	0.187633	-0.401704	-0.682449	-0.082954	0.237841	0.082954	-0.8318	-0.897882	-0.27886	-0.453565	-0.740588	-0.276366	0.050208	0.484658	-0.149351
3	PFI1235w||PF3D7_0925200||rRNA processing and telomere maintaining methyltransferase, putative	1.50169	1.04217	0.004692	-0.01993	-0.293872	0.368656	-0.004692	-0.383485	1.01977	0.569815	-0.588209	-0.805229	1.11104	0.489673	-0.489673	-1.16247	-1.79556	-0.673515	-0.009384	-0.363555	0.091271	-0.080142	0.098536	-0.357243
3	PF14_0466||PF3D7_1448800||Appr-1-p processing domain protein	0.592032	0.53509	0.753097	0.182806	-0.490221	-0.521408	-0.235723	-0.182806	0.124633	-0.020406	0.020406	-1.12694	-0.134136	0.184201	0.06564	-0.972795	-1.08225	-1.0565	-0.98882	-0.365612	-0.258769	0.204607	0.045234	0.154142
3	PFE1425c||PF3D7_0528600||conserved Plasmodium protein, unknown function	0.79695	0.15972	0.178467	0.026363	-1.04946	-0.603816	-0.026363	-1.45751	0.517717	0.233201	-0.284706	-0.93534	0.507697	0.521307	-0.233201	-1.12007	-1.84641	-0.763536	-0.20483	-1.48387	-0.01002	0.288106	0.051505	-0.184731
3	PFI0335w||PF3D7_0906890||tubulin-specific chaperone, putative	0.825735	0.562573	0.379918	-0.436163	-0.954514	-0.170938	0.170938	-0.848314	0.257818	0.441515	-0.214833	-1.42845	0.141207	0.324817	-0.141207	-1.32341	-1.78025	-0.733511	-0.20898	-0.412151	-0.116611	-0.116698	0.073626	0.105037
3	PFF0535c||PF3D7_0610900||trancription factor, putative	0.440004	0.615141	-0.045744	0.064998	-1.01109	0.045744	-0.187334	-1.29674	0.358476	0.130833	-0.296705	-0.217795	0.42364	0.154917	-0.130833	-0.395699	-1.4511	-0.569397	-0.14159	-1.36174	0.065164	0.024084	0.165872	-0.177904
3	MAL13P1.299||PF3D7_1360200||conserved protein, unknown function	0.704043	1.41476	0.775122	0.150217	-0.622599	-0.324931	-0.150217	-0.405359	0.267792	0.442591	-0.062023	-0.875625	-0.118763	0.63823	0.062023	-0.757962	-1.32664	-1.73969	-0.925339	-0.555576	-0.386555	0.195639	0.124046	0.117663
3	PF13_0132||PF3D7_1323400||60S ribosomal protein L23a, putative	1.32972	1.30307	0.986274	-0.029102	-1.13476	-0.149063	0.029102	-1.61772	0.242359	0.220828	-0.578532	-1.94079	0.024952	0.433544	-0.024952	-2.71327	-2.46448	-1.45213	-0.957172	-1.58861	-0.217407	0.212716	0.55358	-0.772476
3	MAL1_ITS2||PF3D7_0112600||product unspecified	0.444277	0.876246	0.700935	0.314433	-0.805978	-1.1462	-0.504752	-0.314433	-0.10526	-0.307251	0.512706	0.073616	-0.825237	0.144738	0.271727	-0.073616	-1.25025	-2.02245	-1.20569	-0.628866	-0.719977	0.451989	-0.240979	-0.147232
3	PFC0271c||PF3D7_0306300||glutaredoxin 1	1.21365	1.1285	1.06347	-0.120722	-1.02772	-0.356086	0.120722	-1.18945	-0.199884	0.490951	0.199884	-1.34151	-0.524552	0.490675	0.36925	-1.70682	-2.24137	-1.48459	-0.94275	-1.06873	-0.324668	-0.000276	0.169366	-0.365309
3	PF11_0454||PF3D7_1144000||40S ribosomal protein S21e, putative	0.948179	1.38415	1.42789	-0.136355	-0.983124	0.136355	-0.288884	-1.17739	0.107452	0.557209	-0.107452	-1.5293	-0.279628	1.18409	0.554401	-1.2424	-1.9313	-1.24779	-1.71678	-1.04103	-0.38708	0.626878	0.661853	0.286891
3	PFB0455w-b||PF3D7_0210100||60S ribosomal protein L37ae, putative	1.24639	1.38073	1.13785	-0.189113	-1.19305	0.189113	-0.198951	-1.45047	0.126294	0.38878	-0.559112	-1.49583	-0.099476	0.589128	0.099476	-2.0288	-2.43943	-1.19162	-1.3368	-1.26136	-0.22577	0.200348	0.658588	-0.532963
3	PF10_0109||PF3D7_1011200||conserved Plasmodium protein, unknown function	0.597399	0.843598	0.763222	0.508393	-0.893525	-0.779045	-0.508393	-0.856359	-0.174241	0.35434	0.162529	-0.162529	-0.289685	0.426991	0.379866	-0.178577	-1.49092	-1.62264	-1.27161	-1.36475	-0.115444	0.072651	0.217337	-0.016048
3	PFF0573c||PF3D7_0611700||60S ribosomal protein L39, putative	1.17253	2.38254	1.725	0.201676	-1.00224	-0.201676	-0.498349	-1.7136	0.286543	0.732047	-0.256012	-1.42072	-0.306518	1.04689	0.256012	-1.73813	-2.17477	-2.58422	-2.22335	-1.91527	-0.593061	0.314844	0.512024	-0.317413
3	PF14_0027||PF3D7_1402500||40S ribosomal protein S31/UBI, putative	1.84755	2.00905	1.48439	0.162876	-1.37115	-0.162876	-0.19136	-2.30368	0.270741	0.322212	-0.255586	-1.88683	-0.153253	0.859056	0.153253	-2.25627	-3.2187	-2.17193	-1.67575	-2.46656	-0.423994	0.536844	0.408839	-0.369441
3	Pfa_snoR_37||PF3D7_0803900||ncRNA	-0.285098	-1.02215	-0.610878	-2.19999	1.14276	1.66883	1.19542	0.285098	0.623809	0.100692	-0.100692	-1.61628	0.288626	0.869109	-0.139609	-1.32351	1.42786	2.69098	1.8063	2.48509	-0.335183	0.768417	-0.038917	0.292774
3	PFI1696c||PF3D7_0935100||conserved protein, unknown function	0.125119	-0.80535	-0.381545	-0.845621	1.57406	0.779516	-0.125119	1.17384	0.542925	0.10241	-0.10241	-0.713356	0.161382	0.338561	-0.14794	-0.984429	1.44894	1.58487	0.256426	2.01946	-0.381543	0.236151	-0.04553	-0.271073
3	PFI1075w||PF3D7_0921900||conserved Plasmodium protein, unknown function	0.202714	-0.916569	-0.491579	-1.05133	0.907968	0.347244	-0.202714	0.613501	0.401368	0.129106	-0.217715	-1.00895	0.456649	0.196565	-0.129106	-1.74253	0.705254	1.26381	0.288865	1.66484	0.055281	0.067459	0.088609	-0.733581
3	PF13_0052||PF3D7_1309600||ribosomal RNA methyltransferase, putative	0.307457	-0.526786	-0.209698	-1.03087	1.05434	0.209698	-0.647187	0.506879	0.5037	0.032829	-0.137489	-1.03609	-0.032829	0.06951	0.091949	-1.13829	0.746879	0.736484	-0.437489	1.53775	-0.536529	0.036681	0.229438	-0.102207
3	PFL0845w||PF3D7_1217500||conserved Plasmodium protein, unknown function	-0.139873	-0.224717	-0.60636	-0.425921	1.16283	0.312622	0.139873	1.01914	0.660179	0.095073	-0.9467	-0.095073	0.517399	0.308334	-0.538723	-0.860129	1.3027	0.537339	0.746233	1.44506	-0.14278	0.213261	0.407977	-0.765056
3	PF14_0131||PF3D7_1413200||conserved Plasmodium protein, unknown function	0.443662	-0.477354	-0.533917	-0.231708	0.708173	0.142257	-0.142257	0.827984	0.404684	0.053888	-0.586866	-0.045445	0.81501	0.045445	-0.258992	-0.442636	0.264511	0.619611	0.39166	1.05969	0.410326	-0.008443	0.327874	-0.397191
3	PF11_0043||PF3D7_1103100||60S ribosomal protein P1, putative	0.689967	-0.196337	-0.244657	-1.41901	1.27207	0.196337	-0.415912	0.84408	0.311983	0.787992	-0.467337	-2.18239	0.023373	0.935504	-0.023373	-2.86728	0.582107	0.392674	-0.171255	2.26309	-0.28861	0.147512	0.443964	-0.684893
3	PF11_0279||PF3D7_1126800||conserved Plasmodium protein, unknown function	0.89705	-0.149993	-0.863903	-0.687415	0.629765	0.041222	-0.041222	0.520908	1.13958	0.48167	-0.653716	-0.128038	1.2121	0.128038	-0.362818	-0.333825	-0.267285	0.191215	0.822681	1.20832	0.072518	-0.353632	0.290898	-0.205787
3	PFC0400w||PF3D7_0309600||60S acidic ribosomal protein P2, putative	0.288646	0.037686	-0.043249	-1.26455	1.08042	-0.037686	-0.656256	0.777316	0.062746	0.26155	-0.528845	-1.54516	-0.062746	0.72556	0.172264	-2.3245	0.791773	-0.075372	-0.613007	2.04186	-0.125492	0.46401	0.701109	-0.779336
3	PFL0700w||PF3D7_1214500||conserved Plasmodium protein, unknown function	0.874659	-0.226695	-0.776529	-0.897792	0.535973	0.226695	-0.247864	0.370949	0.54189	0.43811	-0.705121	-1.18037	0.590702	0.539133	-0.43811	-1.16929	-0.338686	0.45339	0.528665	1.26874	0.048812	0.101023	0.267011	0.011081
3	MAL8P1.10||PF3D7_0829100||conserved protein, unknown function	0.116878	-0.689716	-0.116878	-0.863555	0.521702	0.248764	-0.409486	0.532722	0.53886	0.002089	-0.204102	-1.0476	0.31969	0.068156	-0.002089	-1.55656	0.404824	0.93848	-0.292608	1.39628	-0.21917	0.066067	0.202013	-0.508953
3	PFA0455c||PF3D7_0109300||fatty acid elongation protein, GNS1/SUR4 family, putative	-0.001544	-0.398558	-0.229867	-0.291402	0.726258	0.001544	0.179256	0.928788	0.325753	-0.298611	0.145826	-0.041474	-0.337548	0.237314	0.041474	-0.246058	0.727802	0.400102	0.409123	1.22019	-0.663301	0.535925	-0.104352	-0.204584
3	Pfa_snoR_08||PF3D7_1109300||ncRNA	-0.113883	-0.331779	-0.885328	-1.48246	0.574503	0.489687	0.313289	0.113883	0.290558	0.865899	-0.246771	-0.812061	0.000843	1.10523	-0.000843	-0.61061	0.688386	0.821466	1.19862	1.59634	-0.289715	0.239334	0.245928	0.201451
[truncated: 3,804 more rows]

## Sheet: Stabilization
	DNA Microarray log2 ratios for each strain over time. Thiol-tagged RNA was separated from the total pool by streptavidin magnetic purification. RNA eluted from the beads is representative of 4-TU labeled mRNAs (Transcription) and unbound mRNAs represent non-thiol-tagged transcripts (Stabilization). Both populations were measured by two-color DNA microarray (Agilent Technologies, 60mer SurePrint p…
[truncated: 5,173 more rows]
