# Supplementary material for: Capturing in vivo RNA transcriptional dynamics from the malaria parasite Plasmodium falciparum
Source: HighWire-hosted journal article supplement (doi:10.1101/gr.217356.116), 2017-04-17
Supplement: Supplemental_Table_S2.xlsx [file Supplemental_Table_S2.xlsx]

## Sheet: Table S2
	Table S2 related to Figure 5: Gametocyte-enriched genes identified by Log2 fold change. Genes identified to be gametocyte-associated (≥ 1 log2 fold change (3D7pfs16/3D7cam) in either the Transcription or Stabilization timecourses were K5-means clustered and assembled into a heatmap representative of 3D7 and F12. These genes were then compared to previously published gametocyte data sets and chara…
		Gametocyte-specific Transcription								Gametocyte-specific Stabilization								Comparisions w/ Prev. Studies
ClusterID	Old Gene ID||New GeneID||Product Description	3D7 0h	3D7 12h	3D7 24h	3D7 36h	F12 0h	F12 12h	F12 24h	F12 36h	3D7 0h	3D7 12h	3D7 24h	3D7 36h	F12 0h	F12 12h	F12 24h	F12 36h	RNASeq	DNA Microarray	Mass Spec
1	PFE0175c||PF3D7_0503600||myosin B (MyoB)	0.25018	-1.50622	-0.767632	-0.656422	0.211566	-0.134894	0.314189	-0.191673	0.849856	2.85613	2.40929	2.04745	0.399151	0.400203	-0.043675	-0.17791	YES	NO	NO
1	PF10_0039||PF3D7_1003600||membrane skeletal protein IMC1-related (ALV5)	-0.410585	-1.93273	0.572038	-1.98879	0.438946	-0.045678	0.25725	-0.774575	1.48552	1.91338	1.24638	1.16138	0.074272	-0.282512	0.039124	0.696087	YES	NO	NO
1	PFA0440w||PF3D7_0109000||photosensitized INA-labeled protein 1, PhIL1, putative	-0.884119	-1.22033	0.591871	-2.17905	0.142511	-0.293459	0.446032	-0.56752	1.01589	2.37506	2.377	1.62048	0.393302	0.322805	-0.158202	0.637007	YES	NO	YES
1	PF10_0170||PF3D7_1017500||conserved Plasmodium protein, unknown function	0.6744	-0.699924	-1.31	-1.19774	0.134216	0.491042	0.303255	-0.725652	1.083	2.13918	1.5756	1.87378	0.313257	0.905651	0.209998	0.355384	YES	NO	NO
1	PF13_0011||PF3D7_1302100||gamete antigen 27/25 (Pfg27)	0.087178	-2.55634	-0.651578	-3.75636	-0.15361	0.300897	0.008276	-1.11435	3.62869	4.33687	3.67242	3.73243	-0.666956	-0.653145	-0.594612	0.185104	YES	NO	YES
1	PFD0310w||PF3D7_0406200||sexual stage-specific protein precursor (Pfs16)	0.182574	-2.31808	-1.09323	-0.060708	0.190716	0.673247	0.128905	-0.714555	2.97017	3.36884	2.45023	2.76709	-0.606965	-0.558562	-0.222817	-0.078477	YES	YES	YES
1	PFD1120c||PF3D7_0423700||early transcribed membrane protein 4 (ETRAMP4)	0.177534	-2.91959	-2.46616	-3.73812	0.081178	0.059775	-0.344038	-0.888138	2.68153	2.98692	3.41767	0.775187	-0.35804	-0.377122	-0.344585	0.255178	YES	NO	YES
1	PF10_0303||PF3D7_1031000||25 kDa ookinete surface antigen precursor (Pfs25)	-2.38618	-1.08441	-0.237283	0.206567	-0.368153	0.311794	-0.009322	-0.252321	3.40034	2.0912	1.82363	3.08209	-0.910853	1.13138	-1.04782	-0.15603	YES	NO	YES
1	PF14_0749||PF3D7_1477800||acyl-CoA binding protein (ACBP)	-0.233505	-0.627505	0.098671	-1.09194	-0.356008	0.386579	0.193407	-0.586716	2.14358	2.8544	0.599899	3.13354	0.384562	0.708861	0.196029	0.09395	YES	NO	NO
1	PF14_0748||PF3D7_1477700||Plasmodium exported protein (PHISTa), unknown function (Pfg14-748)	-0.990483	-1.3405	-0.963788	-1.0181	-0.29891	-0.199897	-0.571305	-1.03283	0.84162	1.54469	2.50242	2.36104	-0.559859	-0.41434	-0.788539	-0.440518	YES	YES	YES
1	PFF0510w||PF3D7_0610400||histone H3 (H3)	-1.20487	-5.26856	-5.18638	-4.76961	0.045817	0.504548	0.696321	-0.539812	3.14317	2.85089	0.949995	0.21306	-0.53434	-0.309394	-0.61332	0.384234	YES	NO	YES
1	PF14_0706||PF3D7_1473700||conserved Plasmodium protein, unknown function	-1.86532	-2.6772	-0.243849	-0.506689	-0.005361	0.051745	-0.000813	-0.656029	1.11012	1.70615	1.76637	2.47076	-0.188693	0.059098	-0.208429	-0.131475	YES	NO	YES
1	PFC10_API0010:rRNA||PFC10_API0010:rRNA||apicoplast rRNA	0.488667	-0.899392	-2.1089	-1.5909	-0.593971	-0.229318	-0.18654	-0.886246	2.31116	1.3037	1.5185	1.12767	-0.366443	0.331897	-0.295444	-0.270908	NO	NO	NO
1	PF14_0708||PF3D7_1474000||probable protein, unknown function	-1.28361	-1.86849	-0.568444	-0.831434	0.012864	0.092303	-0.026906	-0.633709	1.08353	2.25801	1.65243	1.95591	0.109691	0.164222	-0.032115	-0.111587	YES	YES	NO
1	PF08TR004||PF3D7_0829800||just upstream of MAL8_rRNA cluster	-1.39992	-3.40652	-1.47803	-2.62362	-0.120256	0.519088	-0.395845	-0.529315	0.887727	2.57897	1.39719	2.05744	0.293743	0.703505	-0.059625	-0.226173	YES	NO	NO
1	PF14_0588||PF3D7_1461800||conserved Plasmodium protein, unknown function	-2.05822	-2.26162	-0.567744	-0.768505	-0.044902	-0.189231	0.162426	-0.467452	1.3486	2.09062	1.39389	1.9098	0.038211	0.034777	-0.085439	-0.234808	YES	NO	NO
1	MAL13P1.308||PF3D7_1361800||conserved Plasmodium protein, unknown function	-0.034004	-1.54461	-1.99582	-0.968531	0.217414	0.135222	-0.401594	-0.621968	0.834608	2.53904	2.63783	-0.013989	0.268553	0.201546	-0.076544	0.775931	YES	NO	YES
1	PFC10_API0002:rRNA||PFC10_API0002:rRNA||apicoplast rRNA	0.596954	-1.71195	-3.47204	-3.13036	-0.729867	-0.076607	-0.010944	-0.441484	3.06177	1.24469	1.28489	1.48471	-0.26095	0.741544	-0.042319	-0.695023	NO	NO	NO
1	PF13_0247||PF3D7_1346700||6-cysteine protein (P48/45)	-2.48218	-1.51125	-0.195643	-0.12497	-0.0653	0.551954	0.075183	-0.145377	0.925177	1.92005	0.791794	2.54939	0.529398	0.202968	0.265289	0.012394	YES	NO	YES
1	PF14_0290||PF3D7_1431100||conserved Plasmodium protein, unknown function	-2.39046	-1.82804	-0.670437	-0.770776	-0.165333	0.157033	-0.060399	0.221168	1.56856	1.77172	0.944625	1.72635	-0.349936	0.07938	-0.080015	-0.458749	YES	YES	YES
1	PFL1090w||PF3D7_1222700||glideosome-associated protein 45 (GAP45)	-0.430025	-0.683615	-0.317169	-0.50733	0.600227	-0.433031	0.487544	-0.623674	1.24576	1.93269	1.19498	0.444486	-0.136687	-0.359939	-0.1872	0.665034	YES	NO	YES
1	MAL13P1.106||PF3D7_1319800||probable protein, unknown function	-2.69485	-2.00305	-0.36324	-0.833677	0.363132	0.04537	0.011124	0.517316	1.52984	2.19223	1.07544	1.70862	-0.197908	0.258216	-0.085133	-0.118626	YES	NO	YES
1	PF14_0183||PF3D7_1418800||signal recognition particle RNA	0.300258	-3.99011	-2.65816	-3.06827	-0.514334	2.15264	-0.34076	0.78387	1.85678	0.197412	-0.478077	3.76558	1.97969	1.34635	0.603117	-1.6402	YES	NO	NO
1	PFD1050w||PF3D7_0422300||alpha tubulin 2	-2.86942	-3.20014	-2.02881	-1.49072	-0.198376	0.532863	-0.156775	-0.186507	1.87264	2.331	0.876744	1.49444	0.166527	0.020141	-0.206464	0.258969	YES	NO	YES
1	PF08_tmp2||PF3D7_0801200||PF08_28S:rRNA	-0.031737	0.186513	-0.444933	-1.10124	-0.753744	0.58864	-0.351879	-0.643108	2.06031	-0.365129	-0.935399	4.16128	-0.665761	-1.33282	-0.1043	0.619243	NO	NO	NO
1	U5RNA||PF3D7_1446000||U5 RNA	-0.176676	-0.171371	0.163635	-0.699235	0.031987	0.615929	-0.543244	-0.016529	0.180838	0.79385	0.625613	4.67684	-0.116807	-0.281367	-0.083474	-0.253616	NO	NO	NO
1	PF13_0197||PF3D7_1335100||merozoite surface protein 7 (MSP7)	0.686753	-4.95672	-5.05148	-3.85481	0.30185	-0.005247	0.232427	-0.771903	0.754559	2.18828	1.94593	0.503686	-0.976587	-0.122983	0.010106	0.893666	YES	NO	NO
1	PF14_0735||PF3D7_1476500||probable protein, unknown function	-1.84903	-1.98089	-1.58357	-1.28659	0.091856	-0.155262	0.480672	-0.753615	0.921041	1.90554	1.25048	1.66239	-0.77427	0.037178	-0.380095	-0.312269	YES	NO	NO
1	PFL1750c||PF3D7_1236200||conserved Plasmodium protein, unknown function	-2.29729	-2.43007	-0.50128	-1.87902	-0.379553	0.060316	0.352658	-0.825448	1.88808	3.06967	0.864664	0.918465	-0.211884	-0.113401	-0.066376	0.098851	YES	NO	NO
1	PF14_0636||PF3D7_1466800||conserved Plasmodium protein, unknown function	-3.41228	-1.98896	-0.04734	-1.49631	-0.087602	0.362451	0.588148	0.045259	1.35124	1.49117	0.658371	2.05615	-0.318304	0.34507	0.158712	0.113226	YES	NO	YES
1	PFE0785c||PF3D7_0515700||glideosome-associated protein 40, putative (GAP40)	0.089022	-0.702461	-0.47722	-0.614942	0.107768	0.223122	0.070332	-0.310952	1.03455	2.07069	1.9739	-1.02729	0.64375	0.252191	0.001306	0.979092	YES	NO	YES
1	PFL1945c||PF3D7_1240100||early transcribed membrane protein 12 (ETRAMP12)	-0.416642	-0.885872	-1.61509	-2.24294	-0.379742	0.878728	0.470426	-0.627353	0.368612	1.82229	1.41594	3.64543	0.930233	1.07529	0.120084	0.261236	YES	NO	NO
1	PF11_0415||PF3D7_1140400||conserved Plasmodium protein, unknown function	-0.177549	-1.43111	-1.56903	-0.427315	0.168371	-0.082453	-0.01074	-0.374747	1.30897	1.30769	2.50082	-0.428855	0.981856	0.302717	-0.046458	0.938199	YES	NO	NO
1	PF10_0164||PF3D7_1016900||early transcribed membrane protein 10.3 (ETRAMP10.3)	-0.236562	-0.744678	-0.003805	-0.28274	-0.109623	0.209525	0.399543	-0.450421	1.53236	3.99044	1.53683	0.566468	-0.940894	-0.730407	-0.168782	0.54781	YES	NO	YES
1	PFD1110w||PF3D7_0423500||glideosome associated protein with multiple membrane spans 2 (GAPM2)	-0.61577	-1.32861	-0.469005	-0.504638	0.040933	0.209546	-0.184748	0.054364	0.782886	1.80476	2.01865	-0.854598	0.396813	0.229999	-0.028374	0.877691	YES	NO	YES
1	PFF0860c||PF3D7_0617800||histone H2A (H2A)	1.08896	-2.84823	-4.30687	-1.91127	0.209199	0.202022	0.38861	-1.22341	1.86623	2.49951	0.80552	-0.578827	-1.23973	-0.877568	-0.497245	0.788252	YES	NO	YES
1	PFC0358w||PF3D7_0308400||U4 RNA	0.32999	-1.05314	-1.30247	-0.726607	-0.161033	1.05564	-0.320493	-0.320108	-0.324711	0.649246	0.557199	4.27288	-0.222864	-1.11755	0.139929	0.355762	NO	NO	NO
1	MAL1_ITS2||PF3D7_0112600||ITS2	-1.25025	-2.02245	-1.20569	-0.628866	-0.719977	0.451989	-0.240979	-0.147232	0.531869	1.26539	0.625642	1.8354	1.42651	0.861842	-0.052362	-0.512635	NO	NO	NO
1	PF08TR005||PF3D7_0829900||just upstream of MAL8_rRNA cluster	0.097762	-1.37259	-1.11404	-1.14176	-0.058561	0.266366	-0.370388	-0.492953	0.191984	2.04707	1.40559	1.04201	0.546579	0.650774	-0.016393	-0.063866	NO	NO	NO
1	PF14_0752||PF3D7_1478000||Plasmodium exported protein (PHISTa), unknown function (GEXP17)	-1.69194	-3.8001	-0.229454	-3.42093	-0.464801	0.336372	-0.0759	-0.840879	-0.447096	1.05096	1.59133	2.92977	0.149205	0.135122	-0.082556	0.269889	YES	NO	NO
1	PF11_0061||PF3D7_1105000||histone H4 (H4)	0.772153	-2.11975	-3.02075	-1.36158	-0.250001	0.052164	0.123484	-0.372372	1.88146	1.55312	0.719764	-0.734098	-0.116056	-0.391428	-0.602416	0.574885	YES	NO	YES
1	S1-type_28S:rRNA||PF3D7_0112700||28S ribosomal RNA	-1.11625	-1.99844	-1.77867	-0.43078	-0.208201	0.396115	-0.424388	-0.602631	0.808332	1.29311	0.792842	1.58549	0.044886	-0.263592	-0.719197	-1.79092	NO	NO	NO
1	MAL13P1.480||PF3D7_1372200||histidine-rich protein III (HRPIII)	-2.21373	-2.75486	2.72467	1.47741	-0.731163	1.31545	0.079446	-0.205308	0.244996	1.38394	1.64479	0.98078	0.586459	0.008321	0.153205	-0.005888	YES	NO	NO
1	PF07_0127||PF3D7_0730400||conserved Plasmodium protein, unknown function	1.35116	-3.29293	-2.68978	-2.8925	-0.155004	0.078081	-0.188413	-0.266995	0.622841	1.49626	1.31292	1.23552	-0.877457	0.287596	-0.191441	0.365141	YES	NO	YES
1	PFI0180w||PF3D7_0903700||alpha tubulin 1	-2.39993	-3.79957	-2.60683	-2.21848	-0.292283	0.376192	0.073793	-0.061883	1.41762	1.34141	-0.025309	-0.070424	0.613904	0.442661	-0.000684	0.58783	YES	NO	YES
2	PFA0240w||PF3D7_0104700||transporter, putative	1.4173	1.68641	1.70385	3.05523	-0.359912	0.334395	-0.108821	1.23606	0.411483	0.46975	0.379849	1.11792	1.28169	-0.31293	-0.382298	-1.13097	YES	NO	NO
2	PFF0800w||PF3D7_0616500||TRAP-like protein (TLP)	0.863749	1.04863	1.05881	1.1934	0.074976	0.564118	0.294646	0.815852	0.577449	0.151954	0.261083	0.961851	-0.305354	-0.597678	-0.246034	-0.466381	YES	NO	NO
2	PF13_0100||PF3D7_1318200||apicoplast glycerol-3-phosphate acyltransferase, putative	1.21265	0.870364	0.760257	1.59501	-0.313571	0.029939	0.044097	0.618579	0.361892	0.497127	-0.195499	0.606858	0.653033	-0.421935	-0.165483	-0.18052	NO	NO	NO
2	PF13_0090a||PF3D7_1316300||conserved Plasmodium protein, unknown function	1.32156	0.377974	1.24654	1.81946	-0.105641	0.170222	0.098163	0.298056	0.246063	0.612694	0.392812	0.851104	-0.748043	-0.682458	-0.217708	-0.687721	NO	NO	NO
2	PFE0510c||PF3D7_0510300||conserved Plasmodium protein, unknown function	0.600547	1.88451	0.972504	2.109	-0.67655	0.083947	0.203646	1.06622	0.390888	0.465139	0.156938	1.37246	-0.117544	1.14603	0.080775	-0.229318	YES	NO	YES
2	MAL13P1.246||PF3D7_1348800||E1-E2 ATPase, putative	0.744883	1.31651	1.02797	1.50819	0.225549	0.220149	-0.06429	0.40667	0.271544	0.583508	0.3608	0.71984	-0.197455	-0.439424	-0.152541	-0.939669	YES	NO	YES
2	PFD1210w||PF3D7_0425300||Plasmodium exported protein (PHISTa), unknown function, pseudogene	1.33856	2.39014	1.70609	2.49357	0.426644	0.406003	-0.133168	1.91345	0.481048	-0.459758	0.001066	1.37189	0.229098	-0.68109	-0.837173	-1.07365	YES	NO	NO
2	PF11_0089||PF3D7_1107600||conserved Plasmodium protein, unknown function	1.07948	1.64149	1.60491	2.76007	0.286945	-0.15319	-0.047476	1.01183	0.594603	0.250572	-0.115769	1.09951	-0.265806	-0.230743	0.03213	-0.43682	YES	NO	NO
2	RNAzID:1743||PF3D7_1341000||tRNA Arginine	2.36126	2.64178	2.28282	3.22151	-0.534043	0.330401	0.010324	1.86107	0.205145	0.04402	0.565424	1.14614	0.310886	-0.243411	-0.147945	-0.81416	NO	NO	NO
2	MAL13P1.195||PF3D7_1338800||CPW-WPC family protein	0.429632	1.26951	0.923983	1.11733	-0.0331	0.248675	0.062884	0.326568	0.525584	0.539865	-0.069137	0.610346	0.482166	-0.177426	-0.258966	-0.568169	YES	NO	NO
2	PFI0550w||PF3D7_0911300||cysteine repeat modular protein 1 (CRMP1)	1.33475	1.02394	1.05665	2.23585	0.094897	0.090125	-0.059748	0.655896	0.279713	0.558105	-0.104484	0.686331	0.090617	-0.116832	-0.302691	-0.364839	YES	NO	NO
2	PF10_0313a||PF3D7_1031900||conserved Plasmodium protein, unknown function	1.13382	1.50746	1.38717	1.35866	-0.022069	-0.00128	0.044688	0.20462	0.413621	0.360779	0.349505	0.591595	0.280778	-0.220382	-0.349971	-0.659432	YES	NO	NO
2	PFB0400w||PF3D7_0208900||6-cysteine protein (P230p)	0.864369	1.63972	1.64824	2.68617	0.127635	0.24586	-0.225983	1.27853	0.383508	0.439485	0.015038	0.933491	-0.245406	-0.300042	-0.19199	-0.466473	YES	NO	YES
2	MAL13P1.66||PF3D7_1313100||conserved Plasmodium protein, unknown function	1.13292	1.49852	1.29662	2.18665	0.381454	-0.288468	0.258948	0.742907	0.62256	0.194768	0.1623	0.794871	-0.181726	-0.156352	0.017873	-0.434457	YES	NO	NO
2	PF14_0158||PF3D7_1416000||conserved Plasmodium protein, unknown function	0.767998	1.28894	0.492548	1.92815	-0.07853	-0.271717	0.073321	0.674772	0.518606	-0.044818	-0.111803	0.906198	0.030431	-1.16689	0.274845	-0.514147	YES	NO	NO
2	PF10_0409||PF3D7_1026900||biotin--acetyl-CoA-carboxylase, putative	1.30434	1.54588	1.962	1.85952	0.081174	-0.141211	0.231829	0.891736	0.964074	-0.31338	-0.103445	0.89069	-0.959563	-0.217548	-0.989477	-1.28712	NO	NO	NO
2	PF08_0062||PF3D7_0816900||adenylate kinase 2 (AK2)	0.593778	1.73287	1.39094	1.72334	0.374307	-0.462842	0.287413	0.143334	-0.198283	0.613043	0.218472	0.655614	-1.85607	-0.443829	-0.279726	-1.05334	YES	NO	NO
2	PFC0640w||PF3D7_0315200||circumsporozoite- and TRAP-related protein (CTRP)	1.74637	0.880525	1.87076	2.82977	0.27331	0.315294	0.203683	0.364938	0.180217	0.59674	0.211133	0.958615	-1.07638	-0.518404	-0.331041	-0.315524	YES	NO	NO
2	PF14_0622||PF3D7_1465500||potassium channel protein (K2)	0.524181	0.78005	1.41857	1.71653	0.329125	-0.307358	0.351495	-0.056627	0.194544	0.570313	0.298323	1.00125	0.181084	-0.20912	-0.037899	-0.529907	YES	NO	NO
2	MAL13P1.177||PF3D7_1335500||conserved Plasmodium protein, unknown function	1.45595	1.01658	1.96267	1.97062	-0.21598	0.262032	0.204722	0.752237	0.406712	0.355127	0.578303	1.08905	0.044829	-0.633472	-0.205841	-0.322134	YES	NO	NO
2	PFC0215c||PF3D7_0304700||conserved Plasmodium protein, unknown function	1.27861	1.8585	0.528574	1.77738	-0.179072	-0.211626	-0.08251	0.400116	0.652068	0.069594	0.150215	0.606457	-0.162821	-0.2449	2.84437	-0.432887	YES	NO	NO
2	PF13_0107||PF3D7_1319200||conserved Plasmodium protein, unknown function	0.743443	1.26399	1.15137	1.72214	-0.280292	-0.26141	0.410217	-0.229817	0.156035	0.335301	0.404704	0.67871	-0.203774	-0.717417	-0.157733	-0.770084	YES	NO	NO
2	PFF0890c||PF3D7_0618400||conserved Plasmodium membrane protein, unknown function	1.41154	1.1405	0.910921	2.21646	-0.208084	0.157518	0.145749	0.575136	0.20776	0.396803	0.520542	0.572308	0.341479	-0.216163	0.194904	-0.075883	YES	NO	NO
2	MAL8P1.212||PF3D7_0700900||RESA-like protein, pseudogene	1.17649	1.9632	1.73623	2.28524	0.04444	0.220539	-0.354037	1.41534	0.438917	-0.299304	-0.011665	1.00188	-0.026426	-0.658912	-0.650926	-0.842588	NO	NO	NO
2	PFL0650c||PF3D7_1213400||conserved Plasmodium protein, unknown function	0.718898	1.10206	0.96052	1.23632	0.195187	0.066624	0.128939	0.540371	0.362549	0.30212	0.412392	1.4918	0.458953	-0.347044	-0.162233	-0.169978	YES	NO	NO
2	PF13_0123||PF3D7_1321000||conserved Plasmodium protein, unknown function	0.996239	1.05189	0.614251	1.78907	-0.040844	0.013774	0.422323	0.777122	0.278073	0.444501	0.388674	0.54135	-0.566566	-0.527078	-0.072725	-0.773919	YES	NO	NO
2	PFL0410w||PF3D7_1208200||cysteine repeat modular protein 3 (CRMP3)	1.19563	1.29041	1.69743	2.19619	0.248968	0.065359	-0.055883	0.334187	-0.03779	0.539658	0.426196	0.87509	-0.100302	-0.370944	-0.067227	-0.351046	YES	NO	NO
2	PF11_0467||PF3D7_1145600||conserved protein, unknown function	1.71351	1.83186	0.301142	0.889467	0.004859	0.123335	-0.21197	0.183403	0.016106	0.801678	0.872858	-0.150596	0.067067	0.055258	-0.22172	-0.259857	YES	NO	NO
2	PF11_0240||PF3D7_1122900||dynein heavy chain, putative	0.893104	1.29688	1.50563	2.3279	0.092554	-0.101641	-0.013093	0.855498	0.351561	0.368392	0.017241	0.82446	-0.303662	-0.323577	-0.014128	-0.763445	YES	NO	YES
2	PFI1450c||PF3D7_0929500||conserved protein, unknown function	1.88301	1.72781	0.678894	2.38449	0.056523	0.071614	-0.704087	0.731704	0.579672	-0.23807	-0.04374	1.02755	-0.71332	-1.42653	-0.522383	-0.96001	NO	NO	NO
2	PFD0825c||PF3D7_0417100||mRNA-binding protein PUF2 (PUF2)	1.01789	1.09181	1.65512	1.95917	0.115087	0.055006	0.275133	0.950507	0.43827	0.27599	0.002702	0.59314	0.22324	-0.088026	-0.073018	-0.563778	YES	NO	NO
2	PF14_0179||PF3D7_1418100||liver specific protein 1, putative (LISP1)	1.20642	1.78857	1.3386	2.41827	0.074511	0.232328	0.224916	0.87177	0.312011	0.399272	-0.177661	0.741311	-0.024786	-0.471726	-0.306292	-0.732222	YES	NO	NO
2	PF07_0060||PF3D7_0715100||conserved Plasmodium protein, unknown function	1.24507	1.20523	0.798668	1.45151	0.040499	-0.14727	-0.025429	-0.026829	-0.237295	0.58687	0.855953	0.640422	-0.616736	-0.602205	-0.210308	-0.042097	YES	YES	NO
2	1400.pre-tRNA-Gln-1||PF3D7_0203500||tRNA Glutamine	1.37217	2.41574	1.13146	2.18413	-0.533257	-0.383785	0.073812	1.07163	0.044412	0.655051	0.421367	0.658438	-1.24996	-1.6235	-0.137974	-1.35169	NO	NO	NO
2	PFL2190c||PF3D7_1245600||kinesin, putative	0.801566	1.01838	1.5481	2.19585	0.232493	-0.105967	0.189838	0.167728	0.304802	0.39076	0.063899	1.07376	0.020566	-0.180632	-0.237361	-0.543659	YES	NO	NO
2	MAL13_tRNA_Arg2||PF3D7_1369800||tRNA Arginine	1.20854	1.36426	1.30851	2.68699	-0.010575	0.389263	0.114415	1.2456	0.716314	-0.49993	-0.279944	1.06907	-0.973465	-0.681981	0.404754	-0.823864	NO	NO	NO
2	MAL8P1.80||PF3D7_0816300||conserved Plasmodium protein, unknown function	0.964246	1.95856	1.92963	2.49051	-0.553202	-0.480533	-0.055696	0.681672	0.309144	-0.043635	0.272299	0.809117	-0.473948	-0.122894	-0.44441	-0.699825	NO	NO	NO
2	PFC0260w||PF3D7_0305800||P-loop containing nucleoside triphospahte hydrolase, putative	1.09841	1.54901	1.25962	2.16932	0.092745	-0.162286	0.107359	0.982278	0.368504	0.3221	0.264185	0.904568	-0.060058	-0.163489	-0.527058	-0.777696	YES	NO	NO
2	MAL8P1.7||PF3D7_0829500||conserved Plasmodium protein, unknown function	1.17639	1.6728	0.682552	1.16778	0.537808	-0.026813	-0.310628	0.27521	0.401349	0.276084	0.289702	0.295179	-0.101736	-0.428655	0.054975	-0.398662	YES	NO	NO
2	MAL8P1.38||PF3D7_0823400||alpha/beta-hydrolase, putative	0.953334	1.08603	0.754764	2.34638	0.162654	0.387676	0.421453	0.765159	0.28638	0.224311	0.140781	0.990073	0.018358	-0.269781	0.084137	-0.733833	YES	NO	NO
2	PFI0185w||PF3D7_0903800||LCCL domain-containing protein (CCp4)	0.321612	1.05997	1.072	1.91699	0.41898	0.264879	0.303867	0.61505	0.215209	0.456199	-0.04253	1.01852	-0.540294	-0.469529	-0.092044	-0.65126	YES	YES	NO
2	PF13_0298||PF3D7_1356000||conserved Plasmodium protein, unknown function	1.07268	1.26802	0.639519	1.69803	-0.179596	0.082886	-0.045329	0.629085	0.244251	0.426016	0.150911	0.554943	-0.360908	-0.495326	-0.293673	-0.46508	YES	NO	NO
2	MAL7P1.105||PF3D7_0720300||conserved Plasmodium protein, unknown function	1.59686	1.32867	1.88689	1.85185	0.277401	0.089088	0.312623	-0.084164	-0.196859	0.664496	0.669856	0.821103	1.10123	-0.423326	0.194105	-0.212089	YES	NO	NO
2	PFB0230c||PF3D7_0205200||conserved Plasmodium protein, unknown function	0.858147	1.68295	1.00894	1.98691	0.405978	-0.079586	0.52993	0.534158	0.105926	0.28067	0.834931	0.565032	-1.43828	-0.288362	-0.234815	-0.632495	NO	NO	NO
2	PF11_0422||PF3D7_1141100||conserved Plasmodium protein, unknown function	0.727036	1.17901	1.24493	2.38705	0.094544	-0.377612	0.120476	0.950885	0.47909	0.050864	-0.034015	1.05483	-0.430916	-0.4143	-0.185428	-0.612838	YES	NO	NO
2	PFL1965w||PF3D7_1240700||rifin pseudogene	1.26635	2.53024	1.52418	2.7443	-0.022081	0.04871	-0.169077	1.9339	0.582983	-0.22381	-0.179523	1.2743	-0.24993	-0.394516	-0.259289	-1.08396	YES	NO	NO
2	PFA0685c||PF3D7_0114200||Plasmodium exported protein (hyp4), unknown function	0.671446	1.54527	0.017752	1.83845	-0.491932	-1.18503	-0.312019	0.774508	0.557872	-0.050786	0.060892	1.07795	-0.26071	-0.54672	-0.513914	-0.410223	YES	NO	NO
2	PF11_0330||PF3D7_1132100||conserved Plasmodium protein, unknown function	0.810159	1.48565	1.22316	2.17729	0.390676	0.13954	0.155374	1.26143	0.339678	0.305383	0.100029	0.908503	-0.505391	-0.03539	0.200338	-0.35558	YES	NO	NO
2	PF08_0017||PF3D7_0827200||conserved Plasmodium protein, unknown function	1.24558	1.92154	1.53252	2.32906	0.242502	-0.098264	0.337645	0.981392	0.40005	0.241264	0.456773	1.06809	-0.113619	-0.459292	0.250141	-0.363554	YES	NO	NO
2	PF10_0231||PF3D7_1023800||conserved Plasmodium protein, unknown function	1.40193	1.58958	0.918574	0.936951	0.916455	-0.048525	-0.210612	-0.312591	0.099637	0.538066	0.63222	0.552259	-0.271749	-0.585198	-0.609349	-0.240342	YES	NO	NO
2	PF11_0456||PF3D7_1144400||conserved Plasmodium protein, unknown function	0.736491	1.05665	1.06825	1.97338	0.015483	-0.092974	0.257982	0.914214	0.182657	0.448506	0.040462	1.06887	-0.340473	-0.427131	0.148106	-0.435691	YES	NO	NO
2	PFI1795c||PF3D7_0937100||Plasmodium exported protein, unknown function	1.99608	1.73388	2.03603	2.74649	-0.655983	-0.571646	-0.44016	0.65913	0.343562	0.265978	0.175067	1.30508	1.01833	-0.482109	-0.280074	-0.572013	YES	NO	NO
2	PF13_0288||PF3D7_1354700||conserved Plasmodium protein, unknown function	0.99756	1.56265	1.23448	1.967	-0.012843	0.004378	-0.041354	0.669179	0.350115	-0.217541	0.309295	0.617619	-1.14111	-0.214653	-0.075406	-0.866914	YES	NO	NO
2	PF10_0102||PF3D7_1010500||ankyrin-repeat protein, putative	0.61285	1.15842	0.920293	1.89683	0.10297	0.139384	-0.494013	0.60399	0.462896	0.152851	0.116024	0.639889	-0.546657	0.071122	-0.457642	-0.753843	YES	YES	NO
2	PF08_0013||PF3D7_0827700||conserved Plasmodium membrane protein, unknown function	1.42264	2.23247	1.63724	2.31052	0.212187	-0.101715	-0.180097	1.03811	0.609443	0.003742	0.136286	0.717085	0.826004	-0.566018	-0.137076	-0.504421	YES	NO	NO
2	PF11_0390||PF3D7_1137900||conserved Plasmodium protein, unknown function	1.31532	1.58446	1.71534	2.11382	0.007812	-0.102488	0.533492	0.9566	0.484168	0.129	0.110861	1.16198	-0.491484	-0.208064	0.106838	-0.464934	YES	NO	NO
2	PF11_0372||PF3D7_1136100||conserved Plasmodium protein, unknown function	0.794609	1.09102	1.01899	2.24151	-0.105539	0.143084	0.297223	0.854514	0.282235	0.307214	-0.167699	0.531989	-0.422631	-0.229712	0.150415	-0.164211	YES	NO	NO
2	MAL7_tRNA_His1||PF3D7_0706900||tRNA Histidine	2.65924	2.67781	2.31178	3.07737	-0.718914	-0.132994	-0.20909	1.75644	-0.258625	-0.306892	0.246809	1.75477	0.184948	-0.815962	0.097791	-0.196468	NO	NO	NO
2	MAL5_tRNA_Leu2||PF3D7_0527800||tRNA Leucine	2.07342	2.62893	1.96877	2.67923	-0.439716	0.606666	-0.046894	1.96257	-0.19041	-0.185646	0.43895	1.48102	-0.508489	-0.954313	-0.119394	-0.98559	NO	NO	NO
2	PFE0230w||PF3D7_0504700||conserved Plasmodium protein, unknown function	0.61047	1.47764	1.0276	1.79145	0.102148	-0.469764	-0.083291	0.024207	0.173361	0.721328	0.196972	0.175416	-0.449878	0.007994	-0.005734	-0.357013	YES	NO	NO
2	MAL13P1.247||PF3D7_1349000||conserved Plasmodium protein, unknown function	1.26831	1.40567	0.715537	1.44486	-0.377461	0.177832	-0.001802	0.60732	0.489242	0.053076	0.395185	0.688394	-0.080835	-0.554853	-0.4452	-0.720434	YES	NO	YES
2	PF14_0638||PF3D7_1467000||conserved Plasmodium membrane protein, unknown function	1.3241	2.14302	1.98246	2.42687	0.070004	0.042369	0.26116	0.320585	0.31359	0.138759	0.164575	1.03754	-0.020636	-0.490616	0.243694	-0.187189	YES	NO	NO
2	PF14_0600a||PF3D7_1463100||conserved Plasmodium protein, unknown function, pseudogene	1.32721	1.43725	1.332	2.13347	-0.47665	0.058206	0.067419	1.36854	0.859553	-0.157694	-0.157825	0.724146	1.40235	-0.285016	0.399381	0.01018	NO	NO	NO
2	PFL1770c||PF3D7_1236600||p25-alpha family protein, putative	1.00447	1.07288	0.995755	1.03339	0.104319	0.249467	0.106707	0.675569	0.153681	0.367928	0.167335	0.922667	-0.931906	-0.661527	-0.540579	-0.357143	NO	NO	NO
2	PFD0340c||PF3D7_0406900||conserved Plasmodium protein, unknown function	1.03644	1.56038	1.21065	2.24958	0.393953	-0.260869	0.02228	0.678142	0.365723	0.195752	0.080518	0.984529	-0.757901	-0.160003	0.025849	-0.370461	YES	NO	NO
2	MAL13P1.107||PF3D7_1319900||conserved Plasmodium protein, unknown function	0.405817	0.929336	1.24678	1.60252	0.257413	-0.091564	0.138283	0.54273	0.388428	0.168774	-0.2629	0.66867	0.466696	-0.174763	-0.053051	-0.419174	YES	NO	NO
2	MAL13_tRNA_Arg1||PF3D7_1341000||tRNA Arginine	2.19788	1.37896	2.00493	2.18311	-0.534043	0.330401	0.010324	1.86107	0.032238	-0.039482	0.377109	1.16215	0.310886	-0.243411	-0.147945	-0.81416	NO	NO	NO
2	PFC10_API0055||PFC10_API0055||apicoplast ribosomal protein S4	2.48707	2.00258	0.27719	2.53528	-0.226775	-0.019033	0.052082	1.98855	0.662073	-0.095912	-0.251608	0.740329	1.43716	-0.308933	0.030581	-0.212589	YES	NO	NO
2	PFL0905c||PF3D7_1218700||conserved Plasmodium protein, unknown function	1.17683	1.74623	0.768388	2.1255	-0.179575	-0.151544	-0.118823	0.605206	0.405604	0.141063	0.269115	0.402429	-0.25788	-0.398721	-0.357645	-0.630721	YES	NO	NO
2	PF10_0224||PF3D7_1023100||dynein heavy chain, putative	0.774834	1.08958	1.30039	2.07803	0.05606	-0.063776	0.217141	0.622725	0.336714	0.205474	0.02642	1.06034	-0.297484	-0.287229	-0.113619	-0.447811	YES	NO	YES
2	PF14_0010||PF3D7_1401000||glycophorin binding protein (GBPH)	1.28393	1.84408	1.28403	2.94803	0.098963	0.39877	-0.216194	1.43108	0.223761	-0.410553	0.093445	0.904488	1.05477	-0.288003	-0.05201	-0.10978	YES	NO	NO
2	MAL13P1.154||PF3D7_1327100||conserved Plasmodium protein, unknown function	0.673322	1.7846	1.90806	2.37408	-0.26495	-0.361107	0.633841	1.16336	0.494724	-0.066922	-0.080098	0.804269	-0.661834	-0.393986	0.111887	-0.464768	YES	NO	NO
2	MAL13P1.173||PF3D7_1334400||MSP7-like protein (MSRP4)	1.55258	1.39687	0.317054	1.22506	-0.038183	0.014898	-0.194615	0.495198	-0.04685	0.495293	0.560532	0.123763	0.268882	-0.740651	-0.473597	-0.176581	YES	NO	NO
2	PFB0355c||PF3D7_0207900||serine repeat antigen 2 (SERA2)	1.80782	1.19078	-0.069224	1.80383	0.285867	-0.11342	-0.130834	0.116074	0.153573	0.377922	0.677505	0.214906	0.491912	-0.515454	-0.367987	-0.194087	YES	NO	NO
2	PFD0430c||PF3D7_0408700||perforin like protein 1,sporozoite micronemal protein essential for cell traversal (SPECT2)	2.04049	1.85363	1.43091	2.20811	0.126221	0.191583	0.24667	0.470634	-0.047528	0.500431	0.249709	0.503882	-0.35501	-0.864302	-0.488638	-1.06217	YES	NO	NO
2	MAL4_tRNA_Ala1||PF3D7_0411500||tRNA Alanine	2.17393	2.18195	1.8057	2.30248	-0.428166	0.023503	-0.141474	0.468792	-0.485477	-0.404891	0.331213	1.66826	-1.37969	-1.76785	-0.44692	-1.64378	NO	NO	NO
2	PFI0060c||PF3D7_0901200||Plasmodium exported protein, unknown function, fragment	1.22941	1.61881	3.39464	3.14843	0.065751	-0.284608	1.18652	0.779193	-0.071184	-0.183486	0.97096	0.687547	0.276921	-0.364227	-0.351496	-0.869948	NO	NO	NO
2	PF14_0404||PF3D7_1442600||TRAP-like protein,sporozoite-specific transmembrane protein S6 (TREP)	1.33647	1.32547	0.91508	2.38237	0.645686	0.096264	0.09494	0.837604	-0.114992	0.323936	0.027163	0.87501	-0.365971	-0.337692	-0.299928	-0.437474	YES	NO	NO
2	PF11_0222||PF3D7_1121400||WD domain, G-beta repeat-containing protein	0.964351	1.18831	0.338961	1.71848	-0.172628	0.298359	0.061326	0.569901	0.191641	0.328522	0.465579	0.733915	-0.765164	-0.623838	-0.581379	-0.882132	YES	NO	NO
2	PFL0965c||PF3D7_1220000||conserved Plasmodium protein, unknown function	0.636973	1.29065	1.57927	2.75242	-0.194866	0.086326	0.172704	0.994024	0.242867	0.27065	0.001066	1.45587	-0.663456	-0.249646	-0.691931	-0.737566	YES	NO	YES
2	PF14_0085||PF3D7_1408800||conserved Plasmodium protein, unknown function	0.92337	2.28056	1.5962	2.51773	0.163621	-0.326438	0.46494	0.848029	0.066661	0.447256	0.311054	0.788831	-0.865415	-0.613546	-0.423966	-0.615383	YES	NO	YES
2	PF13_0181||PF3D7_1333100||conserved Plasmodium protein, unknown function	1.20737	1.04338	0.859937	1.45022	0.023222	0.012794	-0.121277	0.618351	0.055697	0.40005	0.178309	0.592589	0.281698	-0.662178	0.300036	-1.02606	YES	NO	NO
2	MAL5_tRNA_Leu1||PF3D7_0510600||tRNA Leucine	1.78033	2.35508	2.32252	3.30027	-0.55414	0.247904	0.121738	1.61861	0.446298	-0.406108	-0.011054	1.22751	0.140833	-0.512466	-0.025604	-0.294258	NO	NO	NO
2	PF07_0076||PF3D7_0718800||conserved Plasmodium protein, unknown function	1.66641	1.83993	0.807262	2.71508	-0.291038	0.191536	0.085389	1.33762	0.347021	0.15772	-0.068962	1.02775	-0.268705	-0.482308	-0.072537	-0.539414	NO	NO	NO
2	PF11_0070||PF3D7_1105900||conserved Plasmodium membrane protein, unknown function	1.33821	1.47258	1.54457	1.90688	-0.398839	0.367581	0.135176	0.648268	0.518346	-0.28668	-0.180377	0.688703	0.096234	-0.453486	0.073027	-0.66294	YES	NO	NO
2	PFC0210c||PF3D7_0304600||circumsporozoite (CS) protein (CSP)	0.878681	1.30661	0.89116	1.61832	0.180833	0.239675	0.045386	0.178111	0.259045	0.192918	0.136318	0.580258	-0.140959	-0.073407	-0.095029	-0.370778	YES	NO	NO
2	PFC0831w||PF3D7_0318800||triosephophate isomerase, putative	1.19169	1.17901	1.5549	1.35517	-0.021876	-0.080021	0.224225	0.172014	-0.241072	0.582657	0.440163	1.10295	-0.842986	-0.087052	-0.306078	-0.325828	YES	NO	NO
2	PFI0275w||PF3D7_0905600||conserved Plasmodium protein, unknown function	1.1635	1.38169	1.31798	1.81965	-0.203326	0.133242	0.412093	0.804454	0.524923	-0.035442	-0.055065	0.717867	0.012122	-0.501918	-0.154319	-0.522522	YES	NO	YES
2	PFI1125c||PF3D7_0922900||beta-ketoacyl-acyl carrier protein reductase (FabG)	1.14867	1.63286	1.80757	1.90408	-0.090344	0.233185	0.145455	0.498711	0.155808	0.077302	0.261843	0.806956	0.784659	-0.366271	-0.323068	-0.071932	YES	YES	YES
2	PF14_0701||PF3D7_1473300||conserved Plasmodium protein, unknown function	0.777863	1.22675	0.732946	1.90986	-0.282564	-0.371986	0.046526	0.234668	0.392235	0.084528	0.253133	0.697094	-0.783788	-0.141047	-0.106097	-0.32036	YES	NO	NO
2	PF08_0030||PF3D7_0824000||conserved Plasmodium protein, unknown function	1.85015	1.21031	1.07851	1.80866	-0.282564	-0.371986	0.046526	0.234668	0.010083	0.467398	-0.309672	0.859128	-0.783788	-0.141047	-0.106097	-0.32036	NO	NO	NO
2	PFB0965c||PF3D7_0221600||Plasmodium exported protein, unknown function, pseudogene	2.43369	3.06649	2.2922	3.53081	0.400787	-0.219392	0.469459	0.088835	0.421909	0.01366	-0.154722	1.26901	-0.516068	-0.719319	-0.051611	-0.411186	YES	NO	YES
2	PF11_0388||PF3D7_1137600||conserved Plasmodium protein, unknown function	1.86022	1.9884	1.63952	2.38469	-0.557056	-0.485783	0.018361	1.70787	0.264199	-0.10592	0.274688	0.891505	1.16245	-0.483545	0.184099	-1.03353	YES	NO	NO
2	PF14_0727||PF3D7_1475900||conserved Plasmodium protein, unknown function	0.643637	1.45773	1.00452	1.85722	0.258768	-0.21893	-0.263884	1.33719	0.52615	0.12177	-0.372635	0.84233	-0.871995	-0.425271	-0.506625	-1.04878	NO	NO	NO
2	PF11_0405-a||PF3D7_1139500||AAA family ATPase, putative	0.787275	1.16698	1.3086	2.15838	-0.400131	0.342757	0.196247	1.34938	0.426953	0.03525	-0.204049	0.810454	0.589558	-0.527515	0.260291	-0.077473	YES	NO	NO
2	PF10_0290||PF3D7_1029700||conserved Plasmodium protein, unknown function	0.768455	1.86999	0.677531	1.91153	-0.501111	0.056823	0.062657	0.988549	0.425621	-0.166308	-0.160066	1.17235	-0.209003	-0.499647	-0.475042	-0.982474	NO	NO	NO
2	PFL2580w||PF3D7_1253600||rifin pseudogene	2.1421	2.11317	2.02075	3.33717	0.394162	0.371014	0.030144	0.897382	0.306984	0.148406	-0.343486	1.06727	-0.145593	-0.547221	-0.564787	-0.45238	YES	NO	YES
2	MAL13P1.20||PF3D7_1303900||conserved Plasmodium protein, unknown function	0.94362	1.08354	0.752106	2.10366	-0.678213	-0.052594	-0.034239	1.64811	0.577862	0.05951	-0.52159	0.459325	2.1788	0.41015	-0.370735	-0.455706	YES	NO	NO
2	PF14_0537||PF3D7_1456400||conserved Plasmodium protein, unknown function	1.36005	1.5641	1.53006	2.05288	-0.334738	0.340563	0.34528	0.40525	-0.100083	0.092582	0.35781	0.960521	0.964839	-0.397955	-0.028193	-0.538778	NO	NO	NO
2	MAL6_tRNA_Leu1||PF3D7_0620900||tRNA Leucine	2.26713	2.41123	1.46492	3.4179	-0.181976	-0.029742	0.146646	0.577785	0.267416	-0.234234	-0.070275	1.00697	-0.645126	-0.306694	-0.149581	-0.69484	YES	NO	NO
2	PF11_0318||PF3D7_1130800||armadillo repeat protein PF16, putative	0.931187	1.29886	1.01852	2.16727	-0.432228	0.252867	0.833631	1.11388	0.306109	0.080594	0.004313	0.648801	-0.582625	0.151287	-0.092105	-0.297359	YES	NO	NO
2	PFB0235w||PF3D7_0205300||conserved Plasmodium protein, unknown function	1.03887	1.27429	0.641492	2.0569	-0.351031	0.096646	0.310775	0.717495	0.025826	0.410032	0.089788	0.484051	0.844732	-0.376472	-0.017422	-0.419832	NO	NO	NO
2	PF10_0331a||PF3D7_1034100||conserved Plasmodium protein, unknown function	1.34615	1.44246	0.421578	1.73109	0.057699	0.093296	-0.039873	0.314318	0.577281	0.124993	-0.007172	0.442074	0.038331	-0.173247	-0.280355	-0.525953	YES	NO	NO
2	PF13_0283||PF3D7_1354000||conserved Plasmodium protein, unknown function	1.47887	2.14859	1.62314	2.23371	-0.08457	0.078844	-0.101967	0.649998	-0.128944	0.128267	0.809676	0.39909	-1.02043	-0.381994	-0.307015	-0.790526	YES	NO	NO
2	PF14_0624||PF3D7_1465600||conserved Plasmodium protein, unknown function	0.613075	0.999363	1.0048	1.82985	0.270295	0.131036	0.355671	0.364108	-0.039315	0.199944	0.21742	0.543552	-0.343852	-0.740545	-0.112802	-0.584728	NO	NO	NO
2	PF13_0306||PF3D7_1357300||dynein light chain, putative	1.30011	1.91833	1.32173	2.95629	0.100346	0.198589	0.380167	0.448843	-0.159858	0.234478	0.361053	0.807981	-0.319663	0.310696	-0.21514	-0.599238	NO	NO	NO
2	PFL0065w||PF3D7_1201300||liver stage associated protein 1 (LSAP1)	0.860407	0.466556	1.28703	1.53444	-0.03786	0.088594	0.072508	0.966928	0.13787	0.187416	0.260985	1.45815	-0.83931	-0.532339	-0.288592	-0.933198	NO	NO	NO
2	PFL0957w||PF3D7_1219800||conserved Plasmodium protein, unknown function	1.1613	1.57043	1.43106	2.55843	0.026309	0.653262	0.029918	0.5763	0.164538	0.256868	0.060712	1.02676	0.791997	-0.106266	0.099003	-0.095302	YES	NO	YES
2	PF10_0076||PF3D7_1007800||conserved Plasmodium protein, unknown function	0.920298	0.838631	1.74373	1.98545	-0.102377	0.250584	0.198146	0.970732	-0.303412	0.422056	0.184549	0.601992	-0.537925	-0.454841	-0.236644	-0.423942	YES	NO	NO
2	PF14_0093||PF3D7_1409500||conserved Plasmodium protein, unknown function	1.06573	1.3734	0.395161	1.28182	0.189897	-0.046901	0.158535	0.268944	-0.090609	0.381473	0.150439	0.297382	0.000577	-0.225181	-0.278211	-0.127934	NO	NO	NO
2	PF14_0596||PF3D7_1462600||conserved Plasmodium membrane protein, unknown function	1.86496	1.86444	1.84643	2.95495	0.37782	-0.248874	-0.051134	0.155888	0.434137	-0.169766	0.037645	0.860003	0.321227	-0.303424	-0.123266	-0.053957	YES	NO	NO
2	PF08_0050||PF3D7_0819400||perforin like protein 4 (PPLP4)	1.27279	1.66927	1.33984	2.36609	-0.165566	0.30387	0.109039	0.696669	0.225037	0.17852	0.089021	1.00667	0.985043	-0.863485	-0.036648	-0.518014	YES	NO	YES
2	PF14_0503||PF3D7_1452800||conserved Plasmodium protein, unknown function	0.702481	1.60667	1.22763	1.96377	0.128889	0.488944	0.260081	0.927622	0.318725	0.235474	0.044836	-0.01832	0.161574	-0.308157	-0.274422	-0.719723	YES	NO	NO
2	PFL0390c||PF3D7_1207800||conserved Plasmodium protein, unknown function	0.292722	1.3266	1.17328	2.06702	0.416369	-0.077752	0.116327	0.42317	0.157554	0.240309	-0.462509	0.623	-1.09092	-0.281932	-0.128619	-0.354859	YES	NO	YES
2	PFL1730c||PF3D7_1235800||conserved Plasmodium protein, unknown function	0.771877	1.12802	1.0444	1.22738	0.45466	0.145022	0.30812	0.570159	0.268694	-0.111222	-0.172888	0.833803	-1.01253	-0.198591	0.177019	-0.563048	NO	NO	NO
2	MAL4_tRNA_Ile1||PF3D7_0410200||tRNA Isoleucine	2.89531	4.42125	4.09535	3.00161	0.343046	0.031022	0.082342	0.298882	1.18196	0.068776	-0.741585	0.934352	-0.290447	-0.257214	-0.589538	-1.17813	YES	NO	NO
2	PF07_0074||PF3D7_0717800||conserved Plasmodium protein, unknown function	1.24253	1.54914	1.31836	1.73981	-1.07689	0.485789	-0.151847	1.03002	0.137229	0.105581	0.060562	0.596722	0.445692	1.41983	0.303302	-1.30636	YES	NO	NO
2	PF13_0103||PF3D7_1318900||conserved Plasmodium protein, unknown function	0.730806	0.823313	1.41266	1.84736	0.255928	-0.322691	0.159738	0.284268	-0.028503	0.421378	0.042355	0.94911	-0.525088	-0.244574	-0.19288	-0.388871	YES	NO	NO
2	PF14_0074||PF3D7_1407700||conserved Plasmodium protein, unknown function	1.5211	0.393545	1.70061	2.15593	0.112553	0.279956	0.303363	0.170073	0.086114	0.30465	0.213102	1.10529	-0.572721	-0.483546	-0.028231	-0.369245	YES	NO	NO
2	PF14_0130||PF3D7_1413100||conserved Plasmodium protein, unknown function	1.32115	1.38603	1.40699	1.92003	-0.052994	0.370335	-0.107802	0.441568	-0.113408	0.208576	0.158356	0.775696	0.00301	-0.418575	-0.182945	-0.372196	YES	NO	YES
2	PFE0645w||PF3D7_0513000||conserved Plasmodium protein, unknown function	0.067402	1.33444	0.947391	1.35274	0.149209	-0.056643	-0.053383	0.989309	1.28194	0.008924	-0.146508	0.53214	-0.097876	-0.131462	-0.023641	-0.509633	NO	NO	NO
2	MAL8P1.211||PF3D7_0701000||erythrocyte membrane protein 1 (PfEMP1), pseudogene	2.25494	2.65434	2.47403	4.37979	-0.233219	-0.338723	0.044891	0.312522	-0.450243	0.207018	-0.230914	1.20721	0.504223	-0.326028	-0.583189	-1.56584	NO	NO	NO
2	PFL0195w||PF3D7_1204000||conserved Plasmodium protein, unknown function	1.18311	1.5213	1.65427	1.8458	0.215302	-0.057792	-0.313236	1.19998	-0.154561	0.362452	0.29962	0.836264	-0.112743	-0.751068	-0.205294	-0.148724	YES	NO	NO
2	PFC0990c||PF3D7_0322200||conserved Plasmodium protein, unknown function	1.31676	1.96655	0.925532	1.65623	0.110529	-0.258152	0.290472	0.390526	-0.002723	0.382138	0.310363	0.383803	-0.720775	-0.688162	-0.239899	-0.32278	YES	NO	NO
2	PFF1340w||PF3D7_0627600||conserved Plasmodium protein, unknown function	0.743967	1.17442	1.18925	2.04175	0.122142	-0.093345	0.285581	0.009037	-0.617651	0.543927	0.2025	0.175246	-0.804767	-0.651209	0.022355	0.018709	NO	NO	NO
2	PFB0325c||PF3D7_0207300||serine repeat antigen 8 (SERA8)	1.61313	1.69627	0.891034	1.86057	-0.08939	0.074054	0.102609	0.025312	0.285239	0.091074	0.172895	0.735414	-0.285223	-0.085783	0.192641	-0.293436	YES	NO	NO
2	MAL8P1.136a||PF3D7_0805800||conserved Plasmodium protein, unknown function	0.560538	1.23913	1.01253	1.9665	0.132708	0.086611	0.288329	0.604486	0.219111	0.148908	0.12614	0.802223	-0.562865	-0.727309	-0.540789	-0.688056	YES	NO	NO
2	PF11_0334||PF3D7_1132500||amino acid transporter, putative	1.36194	1.18896	1.63449	1.90092	0.134978	0.305775	0.368297	0.786372	0.059292	0.140628	0.496117	0.624701	-0.316376	0.219389	0.044828	-0.429612	YES	NO	NO
2	MAL13P1.410||PF3D7_1359500||conserved Plasmodium protein, unknown function	0.178645	1.65156	0.936472	1.88681	0.186547	0.226245	0.090016	0.612707	-0.263064	0.303999	0.016291	0.374175	-0.164211	-0.194343	-0.039111	-0.409239	YES	NO	YES
2	PFF1285w||PF3D7_0626500||conserved Plasmodium protein, unknown function	1.03717	0.96545	0.681544	1.35624	0.018378	0.283175	-0.175924	0.054824	0.226492	0.127464	0.107677	0.822	0.487881	0.176095	0.172435	-0.410773	YES	NO	NO
2	PFL0715w||PF3D7_1214800||conserved Plasmodium protein, unknown function	-0.226004	1.11423	1.1061	1.81544	0.366952	-0.040523	0.258636	0.298386	0.04192	0.504865	-0.108816	0.18123	-0.749586	-0.660076	-0.034128	-0.731143	YES	NO	NO
2	PF11_0426||PF3D7_1141500||conserved Plasmodium protein, unknown function	1.70685	1.95533	1.10974	2.4389	0.017531	0.153549	-0.184144	0.568574	0.037175	0.234448	0.299927	0.841681	-0.491037	-0.008778	0.168351	-0.465355	YES	NO	NO
2	PFI1635w||PF3D7_0933800||delta tubulin, putative	1.15912	1.19784	-0.342975	1.04991	0.699924	-0.189121	0.0429	0.358798	0.071758	0.275917	0.406225	0.297141	-0.780861	-0.354468	-0.33848	-0.810244	YES	NO	NO
2	PF11_0178||PF3D7_1117200||conserved Plasmodium protein, unknown function	1.12985	1.82689	1.32698	2.15486	0.375781	-0.202252	-0.18135	0.369753	0.091256	0.25061	0.09629	0.33468	-0.109555	-0.414829	-0.176086	-0.128092	YES	NO	NO
2	MAL7P1.97||PF3D7_0718900||conserved Plasmodium protein, unknown function	1.77575	2.14683	1.55652	2.99185	0.218245	-0.080617	-0.140398	0.649833	-0.774891	-0.008164	0.189585	1.14641	-0.106031	-0.624796	-0.098737	-0.692038	NO	NO	NO
2	MAL7_tRNA_Leu1||PF3D7_0714800||tRNA Leucine	1.86759	2.36477	1.74706	2.65203	0.154566	0.012716	0.269193	0.931074	-0.592646	-0.1267	0.461238	1.62246	-1.07873	-0.463085	-0.693622	-0.564034	YES	NO	NO
2	PF14_0756||PF3D7_1478400||probable protein, unknown function	1.34909	2.48957	2.5664	3.22164	-1.07578	0.403026	1.08523	1.66691	0.826471	0.306408	-0.161044	1.2549	-0.337689	-0.625435	-0.222155	-0.216015	NO	NO	NO
2	PF10_0356||PF3D7_1036400||liver stage antigen 1 (LSA1)	2.00082	0.811227	1.24733	1.95594	0.879469	0.448988	0.313954	-0.080757	-0.238812	0.481392	0.201207	1.26971	-0.71496	-0.096177	0.091075	0.430857	NO	NO	NO
2	MAL6_tRNA_Ser1||PF3D7_0621600||tRNA Serine	2.62786	1.82905	0.940035	1.44248	-0.983769	0.556336	0.181342	0.555771	-0.600821	-0.05469	0.068443	1.2846	-0.513803	-1.27998	-0.309287	-0.697939	NO	NO	NO
2	PFA0325w||PF3D7_0106600||conserved Plasmodium protein, unknown function	1.57737	1.54314	0.895262	1.53208	0.414649	0.3268	0.279127	0.622236	0.291181	0.030766	0.063923	0.941343	-0.327761	-0.556109	-0.038061	-0.132779	YES	NO	NO
2	PFL0550w||PF3D7_1211100||HSP20-like chaperone	1.58171	1.77313	1.31639	1.72341	0.202977	-0.120315	-0.337792	0.686372	-0.023784	0.197951	0.323361	0.619311	0.862068	-0.2363	-0.589764	-0.400139	YES	NO	NO
2	PF14_0759||PF3D7_1478700||Plasmodium exported protein, unknown function, pseudogene	2.31626	3.1556	2.22881	3.51245	-0.217933	-0.264072	0.053714	1.79627	0.490071	-0.433245	-0.476986	1.18248	0.459191	-0.543967	-0.199296	-0.644501	YES	NO	NO
2	PF07_0055||PF3D7_0714100||conserved Plasmodium protein, unknown function	1.04791	1.42283	1.41267	2.2944	0.194941	-0.111106	0.096006	0.694709	0.073344	0.225482	-0.031407	0.811999	-0.780862	-0.590981	-0.178573	-0.542959	YES	NO	NO
2	PFC0685w||PF3D7_0315700||conserved Plasmodium membrane protein, unknown function	0.165585	1.36605	1.3486	2.02946	-0.404116	1.1077	0.536172	0.145165	-0.365151	-0.054668	0.120083	0.594992	0.448864	-0.838641	-0.214441	-0.687054	YES	NO	NO
2	PF11_0421||PF3D7_1141000||conserved Plasmodium protein, unknown function	2.05949	1.86426	1.03209	2.94776	-0.023094	-0.157261	0.189829	1.08107	-0.280387	0.460713	0.107657	0.414219	-0.224767	-0.708765	-0.094344	-0.29194	NO	NO	NO
2	MAL5_tRNA_Arg1||PF3D7_0529600||tRNA Arginine	2.17067	1.72313	1.44351	2.89956	-0.65757	0.529012	-0.161604	2.0815	0.107449	0.172082	-0.35469	1.18501	0.875988	-0.02284	-0.002461	-0.495243	YES	NO	YES
2	PFF0260w||PF3D7_0605300||serine/threonine protein kinase (ARK1)	0.957546	1.09593	-0.217141	1.74078	-0.256766	0.485453	-0.387927	0.27244	-0.452409	0.990657	0.043886	0.234866	1.06116	0.161055	-0.079222	0.041525	NO	NO	NO
2	MAL13_tRNA_Arg3||PF3D7_1370000||tRNA Arginine	1.25947	0.812889	1.95026	1.35228	-0.037574	0.206611	0.146595	0.165126	-0.729335	-0.147488	0.357496	1.5555	0.127581	-0.921019	0.12062	-0.32772	YES	NO	NO
2	MAL8P1.149||PF3D7_0802700||conserved Plasmodium protein, unknown function	1.35253	1.19669	0.739227	1.2482	0.359444	0.136586	-0.277456	0.13361	0.015285	0.246236	0.436393	-0.359278	0.334951	-0.178697	-0.005933	-0.029431	YES	NO	YES
2	PFL2450c||PF3D7_1251000||conserved Plasmodium protein, unknown function	0.681694	0.855844	1.98222	1.60317	-0.368043	-0.055586	0.256682	0.415802	0.102235	0.153738	0.23424	1.19582	-0.64097	-0.53237	0.254224	-0.291649	NO	NO	NO
2	PF11_0042||PF3D7_1103000||conserved Plasmodium protein, unknown function	1.30506	1.7278	1.32183	2.70004	-0.279799	0.19989	0.809145	0.801057	0.025118	-0.358931	0.205753	0.722489	-0.138922	-0.309156	-0.224656	-0.807623	YES	NO	NO
2	PFE0735w||PF3D7_0514700||conserved Plasmodium protein, unknown function	1.62087	1.74385	1.72506	3.02124	-0.167057	-0.168264	-0.055633	0.883683	-0.043047	0.297554	0.066639	1.07943	0.198301	-0.289927	0.046351	-0.294184	YES	NO	NO
2	PF10_0027||PF3D7_1002300||conserved Plasmodium protein, unknown function	1.00623	1.34698	1.51672	2.34825	0.077229	0.271548	-0.097311	0.895355	0.210528	0.034618	-0.305103	0.894372	1.0008	-0.29569	-0.187018	-0.236412	YES	NO	NO
2	PFE0125w||PF3D7_0502500||conserved Plasmodium protein, unknown function	0.690604	0.765575	1.56331	1.59221	-0.217308	0.382684	-0.046406	0.990022	0.121168	-0.21815	0.171695	0.937686	0.471003	-0.23898	-0.606513	-0.590999	NO	NO	NO
2	1399.pre-tRNA-Leu-1||PF3D7_1103300||tRNA Leucine	1.439	2.5776	1.83033	3.0982	-0.794361	0.109073	0.084606	1.90004	-0.176004	-0.544016	-0.24975	1.92074	0.203756	-0.358556	0.359437	-0.118894	YES	NO	NO
2	PF11_0326||PF3D7_1131600||conserved Plasmodium protein, unknown function	1.15858	0.905775	0.867348	1.59763	-0.257705	-0.29519	0.200617	0.717469	0.186458	0.18267	-0.159821	0.233022	-0.47104	-0.207787	-0.031286	-0.412295	NO	NO	NO
2	PFD0695w||PF3D7_0414400||conserved Plasmodium protein, unknown function	1.08751	1.5483	1.74052	2.37639	0.015787	0.323422	0.312151	1.03599	0.400405	-0.165432	-0.517982	0.695876	-1.17365	-0.420008	0.044321	-0.795693	YES	NO	NO
2	PFL1850c||PF3D7_1238200||conserved Plasmodium protein, unknown function	0.816596	1.89893	1.74608	2.88929	-0.330624	-0.017783	0.308692	0.270997	-0.199509	0.342206	0.267798	0.707875	-0.231712	-0.72634	-0.288771	-0.25676	YES	NO	NO
2	PF11_0056||PF3D7_1104500||conserved Plasmodium protein, unknown function	1.07599	1.11812	1.24083	1.62697	0.108235	0.340849	0.046456	0.943171	0.243057	-0.014812	0.002012	0.492643	-0.381222	-0.461264	-0.124887	-0.240989	YES	NO	NO
2	PF08_0066||PF3D7_0815900||lipoamide dehydrogenase (aLipDH)	1.63072	2.00998	1.63201	2.23103	-0.31067	0.428385	0.197115	0.340435	-0.078552	0.220053	0.127477	0.287087	0.387238	-0.659903	-0.222548	-0.527055	NO	NO	NO
2	1396.pre-tRNA-Met-1||PF3D7_1438300||tRNA Methionine	1.52329	2.80586	1.45992	2.3785	-0.381141	0.63326	-0.179219	1.37084	-0.174131	-0.077878	-0.527743	1.57444	-0.38647	-0.315391	-0.461254	-0.91172	YES	NO	NO
2	PFD0335c||PF3D7_0406800||conserved Plasmodium protein, unknown function	1.41586	1.89165	-0.196244	1.70737	-0.150406	-0.244145	-0.139986	0.046354	0.188658	0.273283	-0.311125	-0.079127	-1.69836	0.007212	-0.254014	-0.339396	YES	NO	NO
2	PF14_0654||PF3D7_1468600||aminophospholipid transporter, putative	1.00183	1.17535	0.774236	1.43062	-0.026118	-0.148929	0.163686	0.673526	0.612299	0.326572	-0.576614	0.21901	-0.850525	-0.501287	-0.103223	-0.61083	YES	NO	NO
2	PF14_0611||PF3D7_1464300||conserved Plasmodium protein, unknown function	0.842907	1.19801	0.823156	1.7708	0.086331	-0.10818	0.145683	0.517936	0.17291	0.030212	0.287486	0.561007	-1.82594	-0.143874	0.067811	-0.913727	NO	NO	NO
2	PF11_0486||PF3D7_1147800||merozoite adhesive erythrocytic binding protein (MAEBL)	1.23233	1.41646	0.860306	1.30678	0.259489	0.036066	-0.0583	0.20765	0.164563	0.046338	0.139638	0.670497	0.449414	0.001072	-0.079827	-0.392527	YES	NO	NO
2	MAL13P1.340||PF3D7_1367300||conserved Plasmodium protein, unknown function	0.633451	1.45854	2.19184	2.00874	0.219305	-0.091882	-0.023933	0.169792	-0.05519	0.099487	0.601702	0.486003	0.709532	-0.204536	-0.265235	-0.856428	YES	NO	NO
2	PFL2000w||PF3D7_1241600||mitochondrial carrier protein, putative	0.775408	1.47326	1.06776	1.48606	-0.206904	0.04333	-0.241375	0.373018	0.102176	0.103078	-0.081917	-0.039222	-0.233447	-0.04537	-0.067676	-0.606197	YES	NO	NO
2	PFD1006w||PF3D7_0421800||conserved Plasmodium protein, unknown function	1.832	2.70158	1.52098	3.15309	0.169607	-0.267451	-0.140315	1.02346	-0.610216	0.071092	0.44054	0.654823	0.176839	-0.050087	0.081115	-0.318364	YES	NO	NO
2	MAL8P1.78||PF3D7_0816500||small heat shock protein HSP20, putative (HSP20)	1.63748	1.43624	1.47141	2.13443	0.487921	0.050827	0.074673	0.375515	-0.196961	0.197286	0.408441	1.19622	-0.761495	-0.594111	-0.187078	-0.344672	YES	NO	YES
2	PF14_0286||PF3D7_1430700||NADP-specific glutamate dehydrogenase (GDH2)	1.47173	1.79224	0.397774	1.50717	-0.115511	-0.03036	-0.108807	0.25449	-0.182875	0.578968	0.067663	0.120585	-0.183684	-0.210276	-0.030375	0.030654	YES	NO	NO
2	PF14_0040||PF3D7_1404300||secreted ookinete adhesive protein (SOAP)	1.71768	1.12032	0.679591	1.86336	-0.0124	0.180094	-0.034519	0.542752	-0.456091	0.587448	0.689627	0.089804	0.820431	-0.122531	-0.015809	0.25573	YES	NO	NO
2	MAL7P1.206||PF3D7_0706700||DNA mismatch repair protein, putative (MSH2-2)	1.27473	1.00814	0.918375	1.44864	-0.018628	0.328371	-0.079385	0.813478	-0.145589	0.018516	-0.094641	0.841906	-0.03333	-0.369282	-0.231068	-0.156094	YES	NO	NO
2	PF13_0084||PF3D7_1314800||ubiquitin-like protein, putative	0.679164	1.27195	1.5856	1.99805	0.345937	0.245551	0.206509	0.299831	-0.026924	-0.164378	0.26779	0.590958	-0.995211	-0.031862	-0.098996	-0.463823	YES	NO	NO
2	PF11_0411||PF3D7_1140000||carbonic anhydrase, putative	1.47723	1.00392	0.397374	1.19219	-0.081937	-0.032257	0.176167	0.417185	-0.06069	0.22857	0.484854	0.573397	-1.28933	-0.634123	-0.085334	-0.298532	YES	NO	NO
2	PF11_0283||PF3D7_1127200||conserved Plasmodium protein, unknown function	1.1954	1.23209	1.23499	2.18961	0.01288	0.035992	0.53072	1.11451	0.264442	-0.098788	-0.506832	0.478039	-0.946267	-0.843975	-0.59831	-0.543292	YES	NO	NO
2	PFD1195c||PF3D7_0425000||Plasmodium exported protein, unknown function, pseudogene	1.56655	1.56309	1.96052	2.62868	-0.088952	0.003886	0.281531	1.43614	0.137757	-0.034011	-0.202846	1.08226	0.24505	-0.248179	0.029029	-0.991794	YES	NO	NO
2	PFL1360c||PF3D7_1228100||leucine-rich repeat protein (LRR13)	1.18677	1.72405	0.283896	1.92401	0.172684	0.000209	0.166994	0.263476	0.099097	-0.018168	0.214522	0.219434	-0.320581	-0.472868	0.013618	-0.185797	NO	NO	NO
2	MAL13P1.276||PF3D7_1356500||conserved Plasmodium protein, unknown function	1.41966	1.72588	1.33641	2.046	0.195108	0.001111	0.812311	0.765413	-0.681594	0.123225	0.503015	0.418715	-0.941869	-1.38866	-0.142549	-0.404014	YES	NO	NO
2	PF14_0729||PF3D7_1476100||early transcribed membrane protein 14.2 (ETRAMP14.2)	0.806269	1.20078	1.4557	1.85468	-0.173335	0.234725	0.178366	0.412577	0.191929	-0.259952	0.064008	0.81432	0.469153	0.098136	-0.176965	0.069284	NO	NO	NO
2	PF14_0202||PF3D7_1420800||dynein-associated protein, putative	1.54918	1.01681	0.614495	1.73864	0.315414	-0.319699	1.28515	0.785798	0.032506	0.115904	-0.105984	0.740698	-0.446119	-0.58917	0.447709	-0.503897	NO	NO	NO
2	PF14_0586a||PF3D7_1461500||meiotic nuclear division protein 1, putative	0.762041	1.17853	1.7176	1.65943	0.16867	0.0858	1.37099	0.932001	0.254752	-0.285736	-0.198045	0.839376	-0.204164	-0.432878	0.094125	-0.298192	YES	NO	NO
2	MAL13P1.175||PF3D7_1334900||MSP7-like protein, fragment, pseudogene	2.43703	2.91243	0.366712	1.53009	-0.471552	-0.023393	-0.327263	-0.217717	-1.54951	0.758286	1.38011	-0.903141	-0.316181	-0.09871	-0.309998	0.274582	YES	NO	NO
2	PFC0420w||PF3D7_0310100||calcium-dependent protein kinase 3 (CDPK3)	0.622305	1.39229	1.02371	2.21867	0.012359	0.154797	0.060843	0.249617	0.063071	0.068868	0.229072	0.525755	-0.160573	-0.111914	-0.121252	-0.167622	NO	NO	NO
2	PFI0140w||PF3D7_0902900||conserved Plasmodium protein, unknown function	1.44981	2.64689	1.47622	2.63839	-0.31179	-0.008114	0.740053	0.994062	0.14483	-0.263616	0.219373	0.740745	0.357722	-0.161315	-0.129126	-0.424983	YES	NO	NO
2	PFB0177c||PF3D7_0203800||conserved Plasmodium protein, unknown function	0.623698	1.30596	0.939847	1.19507	-0.127326	0.183607	-0.002124	-0.069929	-0.005064	0.73055	-0.243564	-0.023624	-0.767772	-0.135285	-0.110124	-0.27378	NO	NO	NO
2	MAL7_tRNA_Ala1||PF3D7_0702700||tRNA Alanine	2.45474	2.15758	1.67626	2.86717	-0.425621	0.301485	-0.213612	1.00975	-0.768177	-0.218428	0.250556	1.36758	-1.17125	-1.17043	-0.381702	-0.792884	YES	NO	NO
2	MAL7P1.220||PF3D7_0832700||Plasmodium exported protein (PHISTa-like), unknown function, pseudogene	0.999658	1.48884	1.8367	3.11252	0.157908	-0.1678	0.280526	1.17837	0.231029	-0.595359	-0.414617	1.14388	-0.46193	-0.619511	-0.084752	-0.339561	YES	NO	YES
2	PFC1010w||PF3D7_0322600||conserved Plasmodium protein, unknown function	1.29263	1.05887	0.876455	2.29357	0.317406	-0.010766	-0.086869	0.541201	-0.090758	-0.089728	-0.056856	1.05523	-1.09436	-0.390326	-0.339474	-0.230677	NO	NO	NO
2	2277.pre-tRNA-Glu-1||PF3D7_1252000||tRNA Glutamic acid	2.80915	2.0839	1.7338	3.29319	-0.367883	0.253397	-0.660146	1.87133	-0.505445	0.051314	-0.242256	1.53951	-1.50398	-2.80504	0.498278	-0.272678	YES	NO	NO
2	PF10_0044||PF3D7_1004100||hypothetical protein	1.78128	1.82903	1.49901	2.71726	0.098705	-0.059022	-0.080303	0.511252	-0.301875	0.17546	0.291593	0.693295	0.247254	-0.422383	-0.184025	-0.595301	YES	NO	NO
2	PFF0350w||PF3D7_0607100||MYND finger protein, putative	1.07083	1.33472	1.37509	2.17165	0.050431	-0.02827	-6.3e-05	0.719535	0.03738	0.045978	-0.033	0.634396	-0.725087	-0.138509	0.100084	-0.546753	NO	NO	NO
2	MAL7_tRNA_Tyr1||PF3D7_0702800||tRNA Tyrosine	1.8805	1.74796	1.52719	2.02882	-0.374172	0.681227	0.082988	0.959294	-0.297156	-0.167698	-0.035262	1.45298	-0.850823	-0.906107	-0.493738	-0.651179	YES	NO	NO
2	PFA0200w||PF3D7_0104000||thrombospondin-related sporozoite protein (TRSP)	1.71643	1.83578	0.850154	1.68704	-0.149511	-0.001512	0.154641	0.092669	-0.337912	0.301745	0.362613	0.365086	-1.12458	-0.400258	-0.411518	-0.356543	YES	NO	NO
2	MAL13P1.259||PF3D7_1351300||conserved Plasmodium membrane protein, unknown function	1.21629	2.14051	1.41088	3.00708	-0.278711	0.444866	-0.222918	1.03104	0.095743	-0.227484	0.276853	0.657278	0.572048	-0.352991	-0.232011	-0.37019	YES	NO	NO
2	PF10_0234||PF3D7_1024100||conserved Plasmodium protein, unknown function	0.888339	1.27827	0.488208	1.22664	0.459798	-0.240252	-0.047844	-0.168688	-0.090746	0.133057	-0.231896	0.313827	-0.296924	-0.053603	0.028573	-0.054375	YES	NO	NO
2	PFF1275c||PF3D7_0626300||3-oxoacyl-acyl-carrier protein synthase I/II (FabB/FabF)	1.18058	1.84728	0.946573	2.34392	-0.061821	0.038112	0.160813	0.474262	-0.354072	0.231249	0.039947	0.007759	0.400238	-0.391027	-0.402737	-0.606779	NO	NO	NO
2	MAL13_tRNA_Ser1||PF3D7_1337600||tRNA Serine	0.958016	1.64499	0.387795	1.41841	-0.618804	0.0035	0.220651	0.867768	0.076069	-0.037144	-0.051627	0.81094	-0.187337	-0.607945	-0.033345	-0.364167	YES	NO	NO
2	PF14_0206||PF3D7_1421300||conserved Plasmodium protein, unknown function	1.35763	1.22037	0.388602	1.8203	0.383394	-0.081258	0.125301	0.284416	-0.118907	0.149958	0.360811	0.112792	-0.826096	-0.50796	-0.227225	-0.21289	YES	NO	NO
2	PFE1525w||PF3D7_0530500||conserved Plasmodium membrane protein, unknown function	1.6172	1.36683	1.1787	1.97325	0.632297	0.050932	-0.171822	0.600596	-0.044464	-0.077459	0.374723	0.124637	-0.453081	-0.225163	0.479066	-0.43587	NO	NO	NO
2	MAL3_tRNA_Ile1||PF3D7_0312700||tRNA Isoleucine	2.29418	3.39255	3.87612	2.58866	-1.39105	0.550554	-0.366608	1.04152	1.0958	-0.020899	-0.758142	0.747844	-0.174781	1.12149	0.363759	-1.27835	YES	NO	NO
2	PFB0070w||PF3D7_0201400||Plasmodium exported protein (hyp10), unknown function	2.14372	2.38009	2.26305	3.62844	0.001068	-0.025421	0.791313	1.30587	0.260441	-0.280318	0.100331	0.548318	1.25285	0.075117	0.238443	-0.416153	YES	NO	NO
2	MAL13P1.342||PF3D7_1367900||conserved Plasmodium protein, unknown function	1.41212	1.52579	0.949839	1.7953	-0.079654	-0.196673	-0.07508	0.64115	-0.002691	0.029668	-0.18364	0.401501	0.236519	-0.302228	0.108399	-0.069584	YES	NO	NO
2	PFL2205w||PF3D7_1246000||conserved Plasmodium protein, unknown function	0.277065	1.24857	1.64317	2.44115	-0.504328	0.035066	0.126838	0.49796	-0.508633	0.047569	0.089288	0.754514	-0.20858	0.102607	-0.110307	-0.241059	YES	NO	NO
2	PFB0973c||PF3D7_0221900||erythrocyte membrane protein 1 (PfEMP1), pseudogene	1.71927	1.80786	1.78056	2.85687	0.096297	-0.306739	-0.046071	1.33822	0.318866	-0.322627	-0.411993	0.444362	-0.120307	-0.597324	0.08585	-0.362835	YES	NO	NO
2	PFA0625w||PF3D7_0113100||surface-associated interspersed protein 1.1 (SURFIN 1.1) (SURF1.1)	0.820826	1.05494	1.32647	1.69476	0.510206	-0.233146	-0.10563	0.411405	-0.293006	0.230176	-0.02847	0.406883	-0.398474	0.419211	-0.130946	-0.653175	YES	NO	NO
2	PF14_0073||PF3D7_1407600||conserved Plasmodium protein, unknown function	0.33149	0.929784	1.20796	1.11656	0.42309	0.061042	0.445906	0.135366	-0.095062	-0.203203	-0.085458	0.340429	-0.480014	-0.073453	0.040962	-0.149776	YES	NO	NO
2	PF14_0743||PF3D7_1477200||Plasmodium exported protein (hyp15), unknown function	-0.740239	2.15266	1.70507	1.3612	-0.513753	-0.15052	0.065034	1.08772	0.863617	-2.54038	-0.986048	0.955764	0.888304	-0.130968	-0.203625	-0.227935	NO	NO	NO
2	PF14_0595||PF3D7_1462500||conserved Plasmodium protein, unknown function	2.06587	1.21442	1.61426	1.97144	-0.256212	-0.204772	0.097919	0.9084	-0.173435	-0.085698	0.132831	0.599011	-0.634594	-0.353577	0.235931	-0.444824	NO	NO	NO
2	MAL13_tRNA_Trp1||PF3D7_1369900||tRNA Tryptophan	2.29732	1.71943	1.40467	3.0939	-0.340255	0.30244	-0.327902	1.5416	-0.123127	-0.188248	-0.313349	1.18555	-0.959086	-0.445316	-0.16184	-0.581023	YES	NO	NO
2	MAL13P1.203||PF3D7_1340000||secreted ookinete protein, putative (PSOP7)	1.22904	1.78446	1.18843	2.1234	0.199909	0.122787	0.241467	0.393385	-0.270561	0.049882	0.263196	0.278727	-0.974385	-0.704501	0.146248	-0.414274	YES	NO	NO
2	PFI1145w||PF3D7_0923300||perforin like protein 3 (PPLP3)	1.02637	1.26246	1.87208	2.74023	0.013418	0.159287	0.221263	0.955552	-0.006944	-0.387127	-0.226566	0.730092	-0.017093	-0.246208	-0.292915	-0.415631	YES	NO	YES
2	PF10_0230||PF3D7_1023700||conserved Plasmodium protein, unknown function	0.639698	1.82614	1.40983	2.29958	0.734727	0.192576	0.346641	0.70501	-0.468119	0.05163	0.428351	0.365526	-1.14291	-0.130387	-0.098006	-0.714785	YES	NO	NO
2	PFC0050c||PF3D7_0301000||acyl-CoA synthetase (ACS2)	2.13752	1.7214	1.92955	2.83686	-0.503812	-0.22267	0.265752	0.624996	-0.306225	-0.062508	-0.086642	1.3	-0.422047	-0.361662	-0.341931	-0.90832	YES	NO	NO
2	PFC0055w||PF3D7_0301100||Plasmodium exported protein (hyp13), unknown function	1.33709	2.44878	1.97603	3.66727	-0.102396	0.048773	-0.439115	1.14917	-0.152419	0.089704	0.113985	0.526864	-0.452577	0.023982	-0.184653	-0.422462	YES	NO	YES
2	MAL8P1.46||PF3D7_0822500||dynein light chain 1 (DLC1)	1.39235	1.29515	1.26202	1.28755	0.092226	0.33039	0.167715	0.275911	-0.252321	0.176162	0.221846	0.258286	-0.998993	-0.806039	-0.289965	-0.976327	NO	NO	NO
2	PF13_0144a||PF3D7_1325300||conserved Plasmodium protein, unknown function	0.955489	1.78137	1.08525	2.27148	0.322901	0.266812	0.33793	0.491721	-0.344238	0.089116	0.020806	0.036577	-0.347586	0.010612	0.229318	-0.03527	YES	NO	NO
2	PF13_0128||PF3D7_1323000||beta-hydroxyacyl-ACP dehydratase (FabZ)	2.69201	2.4158	1.49532	2.71875	-0.502196	0.209655	0.285633	0.592375	-0.22018	-0.442844	0.366849	0.405942	-0.227595	-0.166794	-0.089305	-0.375831	YES	NO	NO
2	PFF0110w||PF3D7_0602300||liver merozoite formation protein, putative (PALM)	1.35137	1.11374	0.787207	1.67982	-0.542763	0.225034	0.329887	0.656505	0.050795	-0.134265	-0.447879	0.427798	-0.328835	-0.298422	-0.11619	-0.495767	YES	NO	NO
2	PFA0100c||PF3D7_0102000||Plasmodium exported protein (PHISTa), unknown function, pseudogene	1.61337	0.744092	2.05581	2.17404	-0.011842	1.16517	-0.081847	0.713101	-0.05081	-0.327027	-0.075165	1.2943	0.978882	-0.010351	-0.005227	-0.603602	YES	NO	NO
2	PF11_0328||PF3D7_1131900||conserved Plasmodium protein, unknown function	0.836505	1.60111	1.24269	2.25234	0.16261	0.104209	0.03737	0.389012	-0.163111	0.039175	0.009134	0.196763	-0.435866	-0.38995	0.031973	-0.508173	YES	NO	NO
2	PFD0260c||PF3D7_0405300||sequestrin (LISP2)	0.740299	1.58185	1.50538	2.0984	0.33858	-0.10137	0.009346	0.847294	-0.135788	0.000433	-0.044457	0.679987	-0.640399	-0.386254	-0.003639	-0.414381	NO	NO	NO
2	PF11_0518||PF3D7_1150100||rifin, putative, truncated, pseudogene	1.52099	1.97515	2.04616	2.8171	0.028138	0.260758	-0.088487	0.922442	-0.038197	-0.097969	-0.125341	0.8271	-0.540144	-1.05408	-0.072964	-0.22899	YES	NO	YES
2	PFL0760w||PF3D7_1215800||conserved Plasmodium protein, unknown function	1.04075	1.35952	1.31304	2.19775	0.269187	0.26136	-0.180544	0.705885	-0.153676	-0.162048	-0.050502	0.901738	-0.131522	-0.081498	0.049999	-0.362313	YES	NO	NO
2	PFF1255w||PF3D7_0625900||conserved Plasmodium protein, unknown function	1.33785	2.00811	1.38808	2.9986	0.207019	-0.091878	0.171794	0.838959	-0.24822	-0.039918	0.262856	0.417813	-0.195342	0.060021	-0.016854	-0.16334	YES	NO	NO
2	PF14_0041||PF3D7_1404400||mitochondrial ribosomal protein L16 precursor, putative	1.17139	1.02055	0.087152	1.11799	-0.059771	-0.290676	0.357642	-0.252623	-0.496286	0.442837	-0.044201	-0.112616	-0.839636	-0.375876	-0.111815	0.13183	YES	NO	NO
2	MAL8P1.20||PF3D7_0826900||conserved Plasmodium protein, unknown function	1.22401	1.40402	0.242758	1.02851	0.334654	-0.030948	-0.029889	-0.119127	-0.544702	0.09803	-0.080005	-0.117102	-0.635796	-0.243147	-0.203938	-0.045475	YES	NO	NO
2	MAL7P1.224||PF3D7_0832300||Plasmodium exported protein (PHISTa-like), unknown function	1.0264	2.21841	1.3865	2.5949	0.171592	0.244388	0.338726	1.44761	0.082133	-0.365619	-0.82597	0.840393	-0.139918	-0.326484	0.201928	-0.480878	YES	NO	YES
2	PFF1310c||PF3D7_0627000||conserved Plasmodium protein, unknown function	1.42871	1.66285	1.7415	2.44872	-0.033596	-0.017246	0.298631	0.373066	-0.421571	0.201937	0.064719	0.221092	-0.108619	0.05863	0.068389	0.109063	YES	NO	YES
2	PFE0415w||PF3D7_0508400||transcription factor IIb, putative	0.184854	1.01016	1.13268	1.10743	0.085192	-0.046994	0.202	0.161432	-0.208128	-0.570862	-0.321044	0.34727	0.345298	-0.101511	-0.262547	0.009927	YES	NO	NO
2	PF11_0288||PF3D7_1127700||conserved Plasmodium protein, unknown function	1.19229	1.52002	1.37503	1.63756	0.39514	0.033698	0.283349	1.20315	-0.232204	-0.084136	-0.086455	0.811928	-0.315175	-0.429484	0.166057	-0.13998	YES	NO	NO
2	PFE0495w||PF3D7_0510000||conserved Plasmodium protein, unknown function	0.855249	1.79193	0.73227	1.32453	0.124673	-0.140096	0.103055	-0.082198	-0.226465	0.79629	0.041846	-0.540806	-0.299205	-0.299932	-0.115972	0.028294	NO	NO	NO
2	MAL13_tRNA_Thr1||PF3D7_1355400||tRNA Threonine	1.52061	1.72082	1.30611	2.2402	-0.517707	-0.062757	0.185459	0.176666	-0.773284	-0.401921	0.011822	0.391221	-0.657519	-1.15787	-0.115859	-0.687563	YES	NO	NO
2	MAL8P1.37||PF3D7_0823600||lipoate-protein ligase (LipB)	1.52533	1.554	1.62158	1.95428	0.069401	0.140057	0.292277	0.445455	-0.5263	-0.39069	-0.070825	0.375265	-0.706573	-0.407389	-0.123717	-0.612847	YES	NO	NO
2	PFE1065w||PF3D7_0521200||conserved Plasmodium protein, unknown function	1.35832	1.70808	0.498569	1.36041	-0.164915	-0.338815	0.191857	0.141125	-0.784005	-0.005186	-0.370149	-0.085136	-1.00952	-0.580389	-0.331273	-0.446487	NO	NO	NO
2	MAL7_tRNA_Thr1||PF3D7_0706800||tRNA Threonine	1.68249	2.50214	1.55466	2.5383	-0.736124	-0.173546	-0.006825	1.49233	-0.531121	-0.515893	-0.571867	1.51151	-1.33245	-1.47399	-0.210301	-0.673947	YES	NO	YES
2	PFC1016w||PF3D7_0322800||conserved Plasmodium protein, unknown function	0.577705	1.15723	1.00391	2.02294	-0.210459	0.387728	-0.03195	0.88949	-0.53205	-0.757233	-0.235997	0.435861	-0.656112	-0.319559	0.104471	0.152659	YES	NO	NO
2	PFD1215w||PF3D7_0425400||Plasmodium exported protein (PHISTa), unknown function	1.13402	0.365308	2.19578	1.93938	-0.240114	0.18376	0.259639	0.290465	-0.266122	-0.393441	-0.118889	1.12742	-0.631276	-0.701417	-0.008342	-0.246146	YES	NO	NO
2	PFB0972w||PF3D7_0221800||hypothetical protein	0.564916	0.880047	2.22831	1.99208	-0.360825	-0.241435	-0.211935	0.284988	-0.624395	-0.564454	-0.518921	0.704678	0.077793	-0.872072	-0.452794	-0.411887	NO	NO	NO
2	Pfa_snoR_25||PF3D7_1424200||small nucleolar RNA snoR25	1.41766	1.18897	1.73575	2.10386	-0.571436	0.340023	0.037512	0.270511	-1.45733	-1.26651	-0.772317	1.99965	0.217577	-1.23413	0.208513	0.358704	YES	NO	NO
2	PFA0665w||PF3D7_0113800||DBL containing protein, unknown function	0.836232	1.69473	1.57297	1.51843	0.060065	-0.139997	0.010825	0.312564	-0.824475	-1.66631	-1.01685	0.102076	-0.823796	-0.327772	-0.067605	-0.367703	YES	NO	NO
2	PFL0220c||PF3D7_1204400||conserved Plasmodium membrane protein, unknown function	-0.42853	-0.25718	1.52245	1.30606	-0.026643	0.827198	0.082634	0.750938	1.53364	1.13978	0.801092	1.87833	1.80353	0.306144	-0.031463	-0.411872	YES	NO	NO
2	PFE0940c||PF3D7_0518800||secreted ookinete protein, putative (PSOP13)	-0.201216	1.19165	1.2795	2.05598	-0.303441	-0.225255	0.689132	0.437725	1.43803	1.0821	0.809824	1.72964	-0.690365	-0.477816	-0.366349	-0.181976	YES	NO	NO
2	PF14_0522||PF3D7_1454900||conserved Plasmodium protein, unknown function	-0.329943	0.858703	0.752396	1.82321	0.260996	0.313123	1.19814	0.680632	1.42548	0.841416	0.594522	2.18419	-0.822683	0.22128	-0.503029	-0.719803	YES	NO	NO
2	PF14_0698||PF3D7_1473000||conserved Plasmodium protein, unknown function	0.546811	1.62301	0.722829	1.95142	-0.342742	0.475596	-0.222139	1.39986	1.26147	-0.103438	-0.031318	2.28898	0.404121	-0.54089	-0.868719	-0.525199	YES	NO	NO
2	PFC0680w||PF3D7_0315600||conserved Plasmodium protein, unknown function	0.417008	-0.028266	0.461212	0.828196	-0.2295	0.155026	-0.044645	-0.280221	0.68575	1.20804	1.21072	1.4541	-0.213431	-0.005345	-0.553246	-0.213082	YES	YES	NO
2	PFE0220w||PF3D7_0504500||conserved Plasmodium protein, unknown function	-0.130434	1.07512	0.835994	1.69161	-0.76913	-0.068625	0.0504	0.733026	1.30019	0.868748	0.906147	1.52597	0.43871	-0.001328	-0.137734	-0.211451	YES	NO	NO
2	PF10_0069||PF3D7_1006900||PPPDE peptidase, putative	1.42863	0.269887	-0.130055	3.62	-0.777222	0.593198	0.176066	0.92573	-0.747969	2.41591	1.95497	0.152691	0.307993	-0.788604	0.065088	-0.295609	YES	YES	NO
2	PFL1030w||PF3D7_1221400||inner membrane complex protein 1h, putative (IMC1h)	0.131845	-0.59398	-0.159782	1.09562	0.315387	0.1771	0.117236	-0.055674	0.58522	1.493	1.62924	0.731821	-0.301137	0.162167	-0.043195	-0.180464	YES	NO	NO
2	PFL1910c||PF3D7_1239400||conserved Plasmodium protein, unknown function	0.140816	0.160332	1.46546	1.68735	0.029079	0.482452	0.20024	0.06725	0.920634	1.17188	0.276049	1.22762	-0.252804	-0.354851	0.004606	-0.426877	NO	NO	NO
2	Pfa_snoR_08||PF3D7_1109300||small nucleolar RNA snoR08	0.688386	0.821466	1.19862	1.59634	-0.289715	0.239334	0.245928	0.201451	-0.460788	-0.917782	-0.448538	2.37184	-1.69636	-2.31988	0.453667	1.01262	YES	NO	NO
2	PF14_0568||PF3D7_1459500||conserved Plasmodium protein, unknown function	0.444001	1.24717	1.09047	1.41763	-0.111085	-0.446094	0.165309	0.034758	0.413582	-0.051684	-1.0501	0.148762	-0.175221	-0.027171	0.121317	-0.672825	YES	NO	NO
2	PFI0340c||PF3D7_0907100||conserved Plasmodium protein, unknown function	0.868372	1.51879	0.134068	1.47246	-0.096161	0.140945	0.003406	-0.064175	-0.186854	0.004597	-0.501903	-0.164268	0.064811	0.063662	0.065371	-0.132069	YES	NO	NO
2	MAL13P1.58||PF3D7_1301300||Plasmodium exported protein (PHISTa-like), unknown function, pseudogene	-0.639181	0.512661	2.97782	2.14796	-0.252347	0.050053	0.211427	0.457063	0.019859	-0.662935	-0.805545	0.49975	0.008409	0.32834	-0.420251	-0.263625	YES	NO	NO
2	MAL13P1.181||PF3D7_1336300||conserved Plasmodium membrane protein, unknown function	0.519541	1.4106	1.10417	1.19858	-0.311982	-0.181863	0.028739	0.379094	-0.076145	0.106736	-0.751029	-0.360063	0.524673	0.146594	-0.030129	-0.778499	YES	NO	NO
2	PFL1205c||PF3D7_1225000||conserved Plasmodium protein, unknown function	0.274485	1.54909	1.30989	1.84862	-0.132315	-0.228881	0.101614	0.171983	-0.170858	-0.340786	-0.301143	0.285984	-0.881981	-0.252396	-0.006645	-0.424281	YES	YES	NO
2	PFI0205w||PF3D7_0904200||conserved Plasmodium protein, unknown function	-1.5694	0.492579	-0.34212	0.813819	-0.485367	0.30242	0.573769	0.188734	1.61423	1.32814	0.64402	1.75371	-0.183738	-0.383041	-0.273211	-0.763163	YES	NO	NO
2	PF11_0325||PF3D7_1131500||conserved Plasmodium protein, unknown function	-0.554202	-0.008211	0.167698	0.385538	0.696484	0.385408	-0.095004	0.392197	1.56418	0.767309	0.571862	1.21566	-0.891889	0.470855	0.129979	-0.199693	YES	NO	NO
3	PFD0290w||PF3D7_0405800||conserved Plasmodium protein, unknown function	2.88567	0.082024	0.555981	4.38347	-0.762226	1.02358	0.384585	1.11753	-0.209208	2.70364	2.39775	1.52196	-0.461214	-1.34773	0.0607	0.214346	NO	NO	NO
3	MAL13_U6_snRNA||PF3D7_1341100||U6 spliceosomal RNA	2.65028	1.79996	2.58632	2.98883	-0.115003	0.694397	-1.21188	0.432261	0.482433	1.04369	0.470486	4.56692	-1.87056	-2.01933	0.086637	0.723372	NO	NO	NO
3	malmito_rna_RNA5:rRNA||malmito_rna_RNA5:rRNA||mitochondrial rRNA	1.74384	1.59882	2.63876	4.46899	-0.395858	-0.005326	-0.384348	-0.168896	1.79582	1.86198	0.758237	1.28919	-1.37362	-1.3156	-0.358006	0.167285	NO	NO	NO
3	mal_rna_14:rRNA||mal_rna_14:rRNA||mitochondrial rRNA	2.08311	1.60488	3.40204	2.96159	-0.123431	0.186703	-0.410545	-0.043572	0.832159	2.18023	1.14733	1.8477	-1.19571	-0.848091	-0.364159	-0.21985	NO	NO	NO
3	mal_rna_17:rRNA||mal_rna_17:rRNA||mitochondrial rRNA	1.99683	0.793674	3.06029	3.60464	-0.39735	0.40183	-0.131864	-0.165768	0.928999	1.98748	1.31838	1.72538	-0.908932	-0.609298	-0.885732	-0.688923	NO	NO	NO
3	RNAzID:3967||PF3D7_0712100||Plasmodium RNA of unknown function RUF6-12	-1.06665	1.24575	3.28896	3.06745	-0.309888	1.92973	-0.392937	0.604843	1.15978	-0.293419	-0.250649	4.80785	0.787135	-0.735113	0.27763	-1.11728	NO	NO	NO
3	malmito_SSUB:rRNA||malmito_SSUB:rRNA||mitochondrial rRNA	1.54499	1.68826	2.82301	3.83259	-0.411432	0.03203	-0.428558	-0.041752	1.61375	1.83517	0.48203	1.52042	-0.42965	-0.84576	-0.534579	-0.310992	NO	NO	NO
3	PF11_0033||PF3D7_1102000||hypothetical protein	1.93434	0.308484	0.29293	4.36516	-0.265552	0.648774	-0.04898	0.08549	1.08704	1.74646	1.34859	2.29426	0.391223	-1.2286	-0.057231	-0.188531	NO	NO	NO
3	malmito_rna_RNA4:rRNA||malmito_rna_RNA4:rRNA||mitochondrial rRNA	1.56651	0.99497	2.03374	4.20867	-0.373038	0.051318	-0.480806	-0.005382	1.49239	1.8381	1.04905	0.857274	-0.529929	-0.651186	-0.333147	-0.365921	NO	NO	NO
3	malmito_rna_RNA7:rRNA||malmito_rna_RNA7:rRNA||mitochondrial rRNA	1.33105	1.28841	2.41562	3.63968	-0.016728	0.381944	-0.113383	-0.007225	1.48808	1.91185	0.883546	0.987071	-1.23814	-0.941019	-0.419888	0.189976	NO	NO	NO
3	malmito_rna_LSUG:rRNA||malmito_rna_LSUG:rRNA||mitochondrial rRNA	2.28152	1.98232	3.78305	4.28662	-0.697542	0.125976	-0.468664	-0.00259	1.06835	1.95345	0.820616	1.49549	-0.688975	-0.941594	-0.286728	-0.482373	YES	NO	NO
3	mal_mito_1||mal_mito_1||CoxIII	1.44597	0.784438	1.94121	2.33871	-0.507613	0.121525	-0.423649	-0.461599	1.66498	2.06414	0.917965	0.428164	0.127314	-0.009374	-0.215809	-0.393801	NO	NO	NO
3	mal_rna_11:rRNA||mal_rna_11:rRNA||mitochondrial rRNA	1.73963	1.4507	2.794	3.02085	-0.641349	0.288157	-0.403237	-0.13832	1.07699	1.72317	0.964713	0.858004	-0.932001	-0.674807	-0.139489	-0.387255	NO	NO	NO
3	Pfa_snoR_37||PF3D7_0803900||small nucleolar RNA snoR37	1.42786	1.8063	2.69098	2.48509	-0.335183	0.768417	-0.038917	0.292774	0.078802	0.625124	0.366907	3.75484	-0.250023	-0.385744	0.335291	-0.083345	NO	NO	NO
3	malmito_rna_10:rRNA||malmito_rna_10:rRNA||mitochondrial rRNA	1.4717	1.6107	2.45901	3.53662	-0.474138	0.191342	-0.2742	0.038438	1.27455	1.93044	0.687091	1.031	-1.3775	-0.943023	-0.368784	-0.080923	NO	NO	NO
3	malmito_rna_LSUF:rRNA||malmito_rna_LSUF:rRNA||mitochondrial rRNA	1.80129	1.20218	2.67516	4.08899	-0.625514	0.301363	-0.591822	-0.018087	0.96424	1.82926	0.783453	1.14261	-0.828189	-0.844218	-0.506738	-0.213496	NO	NO	NO
3	malmito_rna_1:rRNA||malmito_rna_1:rRNA||mitochondrial rRNA	2.46047	1.50993	2.92598	3.68638	-0.44338	0.249588	-0.553563	0.105344	1.4732	1.6805	0.546761	0.996098	-1.15205	-0.931098	-0.511652	-0.020333	NO	NO	NO
3	mal_rna_15:rRNA||mal_rna_15:rRNA||mitochondrial rRNA	1.55212	1.30264	2.24346	3.84078	-0.517136	0.181307	-0.078329	-0.036052	1.32908	1.93009	0.907202	0.54883	-0.534092	-0.7217	-0.391004	-0.443792	NO	NO	NO
3	malmito_rna_SSUF:rRNA||malmito_rna_SSUF:rRNA||mitochondrial rRNA	1.86433	1.44503	2.78309	4.08218	-0.659761	0.213162	-0.28742	-0.124027	1.10737	2.04802	0.963325	0.809857	-0.959099	-0.796406	-0.297963	-0.391329	NO	NO	NO
3	mal_rna_9:rRNA||mal_rna_9:rRNA||mitochondrial rRNA	1.47416	0.924713	2.10559	3.71497	-0.512558	0.35223	-0.269366	-0.092366	1.21052	1.82787	0.665045	0.756582	-1.09098	-0.577164	-0.335384	-0.173262	NO	NO	NO
3	mal_rna_18:rRNA||mal_rna_18:rRNA||mitochondrial rRNA	1.98054	1.21291	2.77964	4.06406	-0.487082	0.186384	-0.354514	0.045751	0.864115	1.83274	0.964393	0.948899	-0.689758	-0.825268	-0.483497	-0.304928	NO	NO	NO
3	mal_rna_19:rRNA||mal_rna_19:rRNA||mitochondrial rRNA	1.80186	1.69347	3.27687	4.36451	-0.542436	0.215154	-0.445607	0.029466	0.720948	1.90917	0.919854	0.964666	-1.41757	-0.837459	-0.261908	0.025011	NO	NO	NO
3	mal_rna_10:rRNA||mal_rna_10:rRNA||mitochondrial rRNA	1.66332	0.97339	2.49856	3.8224	-0.678919	0.141783	-0.50569	-0.360264	0.857711	1.89742	0.767574	0.819006	-0.986886	-0.752757	-0.318291	-0.417755	YES	NO	NO
3	PFD0290w||PF3D7_0405800||conserved Plasmodium protein, unknown function	2.88567	0.082024	0.555981	4.38347	-0.762226	1.02358	0.384585	1.11753	-0.209208	2.70364	2.39775	1.52196	-0.461214	-1.34773	0.0607	0.214346	NO	NO	NO
3	MAL13_U6_snRNA||PF3D7_1341100||U6 spliceosomal RNA	2.65028	1.79996	2.58632	2.98883	-0.115003	0.694397	-1.21188	0.432261	0.482433	1.04369	0.470486	4.56692	-1.87056	-2.01933	0.086637	0.723372	NO	NO	NO
3	malmito_rna_RNA5:rRNA||malmito_rna_RNA5:rRNA||mitochondrial rRNA	1.74384	1.59882	2.63876	4.46899	-0.395858	-0.005326	-0.384348	-0.168896	1.79582	1.86198	0.758237	1.28919	-1.37362	-1.3156	-0.358006	0.167285	NO	NO	NO
3	mal_rna_14:rRNA||mal_rna_14:rRNA||mitochondrial rRNA	2.08311	1.60488	3.40204	2.96159	-0.123431	0.186703	-0.410545	-0.043572	0.832159	2.18023	1.14733	1.8477	-1.19571	-0.848091	-0.364159	-0.21985	NO	NO	NO
3	mal_rna_17:rRNA||mal_rna_17:rRNA||mitochondrial rRNA	1.99683	0.793674	3.06029	3.60464	-0.39735	0.40183	-0.131864	-0.165768	0.928999	1.98748	1.31838	1.72538	-0.908932	-0.609298	-0.885732	-0.688923	NO	NO	NO
3	malmito_SSUB:rRNA||malmito_SSUB:rRNA||mitochondrial rRNA	1.54499	1.68826	2.82301	3.83259	-0.411432	0.03203	-0.428558	-0.041752	1.61375	1.83517	0.48203	1.52042	-0.42965	-0.84576	-0.534579	-0.310992	NO	NO	NO
3	PF11_0033||PF3D7_1102000||hypothetical protein	1.93434	0.308484	0.29293	4.36516	-0.265552	0.648774	-0.04898	0.08549	1.08704	1.74646	1.34859	2.29426	0.391223	-1.2286	-0.057231	-0.188531	NO	NO	NO
3	malmito_rna_RNA4:rRNA||malmito_rna_RNA4:rRNA||mitochondrial rRNA	1.56651	0.99497	2.03374	4.20867	-0.373038	0.051318	-0.480806	-0.005382	1.49239	1.8381	1.04905	0.857274	-0.529929	-0.651186	-0.333147	-0.365921	NO	NO	NO
3	malmito_rna_RNA7:rRNA||malmito_rna_RNA7:rRNA||mitochondrial rRNA	1.33105	1.28841	2.41562	3.63968	-0.016728	0.381944	-0.113383	-0.007225	1.48808	1.91185	0.883546	0.987071	-1.23814	-0.941019	-0.419888	0.189976	NO	NO	NO
3	malmito_rna_LSUG:rRNA||malmito_rna_LSUG:rRNA||mitochondrial rRNA	2.28152	1.98232	3.78305	4.28662	-0.697542	0.125976	-0.468664	-0.00259	1.06835	1.95345	0.820616	1.49549	-0.688975	-0.941594	-0.286728	-0.482373	YES	NO	NO
3	mal_mito_1||mal_mito_1||CoxIII	1.44597	0.784438	1.94121	2.33871	-0.507613	0.121525	-0.423649	-0.461599	1.66498	2.06414	0.917965	0.428164	0.127314	-0.009374	-0.215809	-0.393801	NO	NO	NO
3	mal_rna_11:rRNA||mal_rna_11:rRNA||mitochondrial rRNA	1.73963	1.4507	2.794	3.02085	-0.641349	0.288157	-0.403237	-0.13832	1.07699	1.72317	0.964713	0.858004	-0.932001	-0.674807	-0.139489	-0.387255	NO	NO	NO
3	Pfa_snoR_37||PF3D7_0803900||small nucleolar RNA snoR37	1.42786	1.8063	2.69098	2.48509	-0.335183	0.768417	-0.038917	0.292774	0.078802	0.625124	0.366907	3.75484	-0.250023	-0.385744	0.335291	-0.083345	NO	NO	NO
3	malmito_rna_10:rRNA||malmito_rna_10:rRNA||mitochondrial rRNA	1.4717	1.6107	2.45901	3.53662	-0.474138	0.191342	-0.2742	0.038438	1.27455	1.93044	0.687091	1.031	-1.3775	-0.943023	-0.368784	-0.080923	NO	NO	NO
3	malmito_rna_LSUF:rRNA||malmito_rna_LSUF:rRNA||mitochondrial rRNA	1.80129	1.20218	2.67516	4.08899	-0.625514	0.301363	-0.591822	-0.018087	0.96424	1.82926	0.783453	1.14261	-0.828189	-0.844218	-0.506738	-0.213496	NO	NO	NO
3	malmito_rna_1:rRNA||malmito_rna_1:rRNA||mitochondrial rRNA	2.46047	1.50993	2.92598	3.68638	-0.44338	0.249588	-0.553563	0.105344	1.4732	1.6805	0.546761	0.996098	-1.15205	-0.931098	-0.511652	-0.020333	NO	NO	NO
3	mal_rna_15:rRNA||mal_rna_15:rRNA||mitochondrial rRNA	1.55212	1.30264	2.24346	3.84078	-0.517136	0.181307	-0.078329	-0.036052	1.32908	1.93009	0.907202	0.54883	-0.534092	-0.7217	-0.391004	-0.443792	NO	NO	NO
3	malmito_rna_SSUF:rRNA||malmito_rna_SSUF:rRNA||mitochondrial rRNA	1.86433	1.44503	2.78309	4.08218	-0.659761	0.213162	-0.28742	-0.124027	1.10737	2.04802	0.963325	0.809857	-0.959099	-0.796406	-0.297963	-0.391329	NO	NO	NO
3	mal_rna_9:rRNA||mal_rna_9:rRNA||mitochondrial rRNA	1.47416	0.924713	2.10559	3.71497	-0.512558	0.35223	-0.269366	-0.092366	1.21052	1.82787	0.665045	0.756582	-1.09098	-0.577164	-0.335384	-0.173262	NO	NO	NO
3	mal_rna_18:rRNA||mal_rna_18:rRNA||mitochondrial rRNA	1.98054	1.21291	2.77964	4.06406	-0.487082	0.186384	-0.354514	0.045751	0.864115	1.83274	0.964393	0.948899	-0.689758	-0.825268	-0.483497	-0.304928	YES	NO	NO
3	PFL1625w||PF3D7_1233700||homocysteine S-methyltransferase, putative	1.51266	1.20796	1.52674	0.508382	0.034463	0.010924	-0.131793	0.022824	0.092298	0.433945	0.568829	-0.536031	0.385456	-0.387499	0.014549	-0.066338	YES	NO	YES
3	PF11_0293||PF3D7_1128200||multiprotein bridging factor type 1, putative (MBF1)	1.4486	0.815523	1.96123	2.27789	-0.15623	0.291234	0.46374	0.147445	1.22728	-1.21051	-0.417862	1.68272	0.031573	-0.51679	-0.715124	-0.742125	YES	NO	YES
4	PF13_0326||PF3D7_1361400||actin-depolymerizing factor 2 (ADF2)	1.88999	1.4116	1.37515	0.619066	-0.088962	0.172138	0.058611	-0.26998	-0.220325	1.01803	1.10288	-0.65035	-0.36234	-0.091955	-0.2522	-0.044087	YES	NO	NO
4	PFI1440w||PF3D7_0929300||conserved Plasmodium protein, unknown function	1.38351	1.8918	1.36638	1.28183	-0.166405	0.041611	-0.001219	-0.073456	0.492699	0.271223	0.120635	0.507705	-0.236321	0.66578	-0.177156	-0.56415	YES	NO	NO
4	PF10_0181||PF3D7_1018800||conserved protein, unknown function	1.09822	1.67851	1.13634	1.16377	-0.035103	0.047207	-0.037039	0.013142	-0.32158	0.284255	0.372568	0.25722	0.363084	0.106109	-0.028276	-0.069642	YES	NO	NO
4	PF14_0753||PF3D7_1478100||Plasmodium exported protein (hyp13), unknown function	1.21418	0.825213	1.26017	-0.105078	-0.844667	0.05846	0.276675	0.044122	-1.81017	0.470859	1.52561	0.146	0.704768	0.401341	0.196372	-0.246684	YES	NO	NO
4	PF14_0709||PF3D7_1474100||mitochondrial ribosomal protein L20 precursor, putative	0.758948	2.31948	0.743978	1.26262	-0.479813	-0.047618	0.314164	0.205034	0.271712	0.196735	-0.381718	0.12787	0.004369	0.1375	-0.120105	-0.1317	NO	NO	NO
4	PF10_0283a||PF3D7_1029000||putative conserved pseudogene	1.84124	1.40365	0.972885	0.866426	-0.861312	-0.449217	-0.482933	0.493211	0.211072	0.196742	-0.875729	-0.049174	0.45347	-0.152286	0.254254	-0.78166	NO	NO	NO
4	PF10_0015||PF3D7_1001100||acyl-CoA binding protein, isoform 1, ACBP1 (ACBP1)	2.00631	1.51314	3.35121	-0.073446	-0.197962	0.42904	0.174245	-0.090198	-0.164431	-0.0712	0.418899	1.31645	0.166117	0.156393	-0.186349	0.26665	YES	NO	NO
4	PFF0180w||PF3D7_0603700||phenylalanyl-tRNA synthetase subunit, putative	0.923665	1.32421	0.671708	1.13092	-0.264142	-0.043518	0.215711	0.091418	0.146017	0.654727	-0.46608	-0.180712	0.200532	0.052631	0.073711	-0.40729	YES	NO	NO
4	PFB0279w||PF3D7_0206300||conserved Plasmodium protein, unknown function, pseudogene	0.220662	0.485999	1.63319	1.73755	0.232966	-0.089962	0.102196	-0.672758	0.146588	0.107926	0.053377	0.368977	0.674686	0.085857	0.138017	0.104189	YES	NO	YES
4	PFA0520c||PF3D7_0110700||chromatin assembly factor 1 protein WD40 domain, putative	1.04957	1.49277	0.833836	1.07757	-0.248154	0.059941	0.261692	-0.299263	-0.357941	0.547146	-0.550159	0.199353	0.443976	0.079713	-0.075315	0.359471	YES	NO	YES
4	PFF0230c||PF3D7_0604700||glyoxalase I (GILP)	1.45729	3.0561	0.725238	1.93694	-0.187086	0.192109	0.08479	-0.297017	-1.6262	0.40468	0.725058	-0.564851	-0.724017	0.155674	-0.346781	-0.04033	YES	NO	YES
4	PF14_0570||PF3D7_1459700||pyridoxal 5'-phosphate synthase, putative	0.862925	1.47991	1.34092	0.816852	-0.289721	-0.028896	0.067164	0.230678	-0.107126	0.275068	-0.939268	-0.331553	0.504582	-0.222511	-0.207713	-0.237691	YES	NO	YES
4	PF14_0138||PF3D7_1414000||26S proteasome regulatory subunit RPN13, putative (RPN13)	1.73789	1.43019	-0.424894	0.733754	-0.38347	0.350831	-0.073575	0.121271	-0.155308	0.15222	0.67177	-0.506705	0.508469	0.240969	-0.039987	0.45994	YES	NO	YES
4	PFE1165c||PF3D7_0523300||conserved Plasmodium protein, unknown function	2.04558	1.71642	0.223313	0.488264	0.067072	0.022119	0.161251	-0.025234	0.161675	0.546517	-0.032113	-0.282277	-0.01248	-0.027938	-0.127312	0.135387	YES	NO	NO
4	PFC0506w||PF3D7_0312000||conserved Plasmodium protein, unknown function	0.843954	2.18978	1.42463	1.27108	-0.285461	-0.102464	0.116985	0.228131	0.060822	-0.053253	-0.478594	-0.114614	0.065229	0.179254	-0.12552	-0.315433	YES	NO	NO
4	PFE0065w||PF3D7_0501300||skeleton-binding protein 1 (SBP1)	0.657435	-0.138201	2.32224	1.67913	-0.409816	0.552899	-0.373849	-0.447805	-0.659125	-1.07803	0.626639	1.01262	-0.007149	-0.190279	-0.273297	0.311303	NO	NO	NO
4	PF14_0500||PF3D7_1452500||SNARE protein, putative (BET1)	1.85645	1.83738	-0.267327	0.61592	-0.395523	0.055666	-0.148937	-0.038489	-1.4277	0.800355	0.938729	-1.01295	0.697264	-0.118846	0.018301	0.534261	YES	NO	NO
4	PF11_0324||PF3D7_1131400||conserved Plasmodium protein, unknown function	0.699592	1.90167	1.34227	1.10598	-0.118897	-0.075615	-0.045997	0.103886	0.047002	-0.061818	-0.890929	-0.006336	0.042443	-0.14091	0.076958	-0.409515	YES	NO	NO
4	PFE1565w||PF3D7_0531300||conserved Plasmodium protein, unknown function	2.30813	1.77277	1.59791	0.383326	0.269023	0.157319	0.335025	-0.334289	0.103165	-0.278883	-0.366007	0.49742	0.691706	-0.181047	-0.065902	-0.14161	YES	NO	NO
4	MAL13P1.196||PF3D7_1338900||serine/threonine protein kinase, putative	1.9353	2.13631	0.440184	1.54743	-0.285166	0.000575	0.077266	-0.284666	0.094186	0.071184	9.4e-05	-0.546533	-0.551318	-0.127078	-0.008048	0.249604	YES	NO	YES
4	PF14_0248||PF3D7_1426900||ubiquinol-cytochrome c reductase hinge protein, putative	2.2284	2.41291	-0.194922	2.04378	-0.25744	0.069922	-0.001353	-0.104351	-1.03741	0.52872	0.689944	-0.793946	-0.633808	0.064013	-0.34623	0.397973	YES	NO	NO
4	PF10_0226||PF3D7_1023300||conserved Plasmodium protein, unknown function	1.47722	1.67878	0.974473	1.20938	-0.379848	0.273104	0.089396	0.299254	-0.40766	0.633261	-0.035238	-0.079008	0.541734	0.258415	0.030323	-0.187078	YES	NO	NO
4	MAL7P1.74||PF3D7_0715400||secreted ookinete protein, putative (PSOP20)	0.321772	2.3462	1.51112	0.900502	0.010672	-0.039286	-0.103001	0.451109	-0.044921	0.402829	-0.568848	-0.741238	-1.08938	-0.05018	-0.106787	-0.046295	YES	NO	YES
4	PF10_0066||PF3D7_1006600||phosducin-like protein, putative (PhLP1)	0.035088	1.47366	1.50969	0.921882	0.065842	-0.262353	0.183728	0.239369	-0.161177	0.011712	-0.112272	-0.158378	0.212012	-0.317033	-0.230852	-0.484712	YES	NO	YES
4	PF13_0140||PF3D7_1324800||dihydrofolate synthase/folylpolyglutamate synthase (DHFS-FPGS)	1.21139	1.65314	0.04951	1.43302	-0.169129	0.07824	0.065856	0.128556	-0.187208	0.110689	0.194469	-0.638455	0.169294	0.297338	-0.196684	-0.123702	YES	NO	NO
4	PFF1180w||PF3D7_0624500||anaphase promoting complex subunit, putative	1.89542	1.39429	0.184591	0.915782	-0.439288	0.217992	-0.176578	0.061097	-0.521529	0.549748	0.540308	-0.694937	0.113651	-0.576782	-0.317902	0.409374	NO	NO	NO
4	PF10_0228||PF3D7_1023500||conserved Plasmodium protein, unknown function	2.56237	2.92692	0.576856	2.44583	-0.460488	0.211628	0.030201	0.565191	-1.28489	0.686319	0.273253	-0.460316	2.00835	0.09081	0.25109	-0.29856	YES	NO	YES
4	PFF0935c||PF3D7_0619300||conserved Plasmodium protein, unknown function	0.640028	1.77784	1.33089	1.25443	0.089064	-0.361134	0.008725	0.137742	-0.088319	-0.098774	-0.312613	-0.064745	-0.395982	-0.233295	0.060453	-0.047123	YES	NO	NO
4	PFI1835c||PF3D7_0930900||NifU-like protein, putative	2.49279	2.00985	1.30412	0.355476	-0.259796	-0.051647	0.283231	0.034902	0.299114	-0.090944	-0.671461	0.380356	0.422837	0.174449	0.040358	-0.525713	YES	NO	NO
4	MAL8P1.75a||PF3D7_0817100||GTPase, putative	0.623629	1.59849	1.06742	1.42777	0.150912	-0.235994	0.377131	-0.068917	-0.087766	-0.141562	-0.399268	0.306299	-0.245007	-0.290973	-0.044504	-0.368679	YES	NO	NO
4	PFI1275w||PF3D7_0926000||protein kinase, putative	0.49181	1.38076	1.15759	1.21158	-0.081852	-0.161513	0.196269	-0.229523	-0.15474	-0.036246	-0.674091	-0.277631	0.247585	0.056028	0.158739	-0.260271	YES	NO	NO
4	MAL7P1.6||PF3D7_0702000||Plasmodium exported protein (hyp12), unknown function	1.81317	1.48126	1.89542	1.47087	-0.400429	0.199454	0.18533	-0.79967	-0.973222	-0.198674	1.0963	0.568007	0.122264	0.191365	-0.276764	0.247231	YES	NO	NO
4	PFF0465c||PF3D7_0609400||mitochondrial cardiolipin synthase, putative (CLS)	-0.094628	1.17499	1.27775	0.886912	-0.107935	-0.148248	-0.042759	0.000641	-0.003101	-0.268807	-0.295884	-0.196613	0.4107	0.152406	0.177558	-0.084453	YES	NO	YES
4	PF10_0120||PF3D7_1012300||ubiquinol-cytochrome c reductase complex subunit, putative	1.61447	1.55327	-0.094278	0.974835	-0.207601	0.047296	-0.224508	-0.201561	-0.732129	0.731614	0.631341	-0.904422	-1.28099	-0.020535	-0.318067	0.518169	YES	NO	YES
4	PFL0280c||PF3D7_1205600||conserved Plasmodium protein, unknown function	1.06876	2.59108	0.978761	2.31177	-0.297097	-0.195082	0.205587	-0.455142	-0.361931	0.069905	-0.406187	0.095477	0.138352	-0.378621	0.094229	0.353592	YES	NO	NO
4	PF13_0068||PF3D7_1312300||mitochondrial ribosomal protein S35 precursor, putative	1.69175	2.38952	0.49642	1.88367	0.077192	-0.192107	-0.199837	0.207673	-0.599884	0.380458	0.119306	-0.419763	0.51358	0.22139	-0.098355	-0.502223	YES	NO	NO
4	PF14_0582||PF3D7_1461000||conserved Plasmodium protein, unknown function	0.961627	1.24493	0.556445	1.19622	-0.36752	0.098856	-0.018257	0.102872	-0.311746	0.491482	-0.407529	-0.379384	0.474812	0.202307	0.249801	-0.295376	NO	NO	NO
4	PFI1463w||PF3D7_0929900||conserved Plasmodium protein, unknown function	1.90558	2.14507	-0.32009	1.25913	-0.442176	0.133051	-0.31572	0.202195	-0.973021	0.35585	0.308579	-0.623938	0.046099	0.116909	0.267809	-0.058762	YES	NO	NO
4	PF14_0451||PF3D7_1447300||mitochondrial ribosomal protein S14 precursor, putative	-0.138291	1.88802	1.2581	1.08969	-0.316199	-0.069669	-0.004337	0.500471	-0.048997	-0.268801	-0.584583	-0.099956	-0.751554	0.27803	-0.326843	-0.48695	YES	NO	NO
4	PF08_0025||PF3D7_0825600||cytochrome c oxidase assembly protein, putative	1.27085	2.02321	0.752286	1.6641	-0.312968	0.07157	-0.098472	0.053203	-0.66598	0.424921	-0.051721	-0.29747	0.249306	-0.313934	-0.192897	-0.577263	YES	NO	NO
4	PFI0960w||PF3D7_0919600||dolichyl-diphosphooligosaccharide-protein glycosyltransferase, putative	0.864922	2.11727	0.92828	1.42243	-0.2137	-0.183093	0.257652	-0.01623	-0.40868	0.083696	-0.843566	-0.559027	0.677531	0.099858	0.212295	-0.246701	YES	NO	NO
4	MAL8P1.4||PF3D7_0830600||Plasmodium exported protein (PHISTc), unknown function	1.11251	0.855328	2.22145	1.88546	-0.148703	0.333443	0.212492	-0.459431	-1.33396	-0.245619	0.948435	-0.091298	-0.20522	0.192859	0.177894	0.159215	YES	NO	NO
4	PFB0880w||PF3D7_0219100||conserved protein, unknown function	0.225927	0.867564	1.47118	1.40252	-0.046631	0.007393	0.155697	-0.016467	-0.408399	-0.071805	-0.28623	0.42425	-0.23432	-0.019516	-0.09411	-0.267122	YES	NO	NO
4	PF14_0148||PF3D7_1415000||uracil-DNA glycosylase, putative	1.77048	1.78789	0.251232	0.819777	0.060379	-0.039538	0.166087	-0.257969	-0.30428	0.705927	0.190805	-0.790187	0.533874	0.230612	-0.156021	0.031126	YES	NO	YES
4	PF11_0117||PF3D7_1111100||replication factor C subunit 5, putative (RFC5)	2.12599	3.31224	0.758718	2.43654	-0.27277	0.051803	-0.262286	-0.010966	-1.71683	0.213885	0.447296	-0.752793	-1.27367	0.267922	-0.023488	0.539618	YES	NO	NO
4	PFB0535w||PF3D7_0212000||GDP-fructose:GMP antiporter, putative	2.46602	1.82868	0.261071	0.046796	-0.475479	0.24084	-0.242309	0.094678	-0.314625	0.845743	-0.260424	-0.759912	1.10938	0.217662	0.147216	-0.26123	YES	NO	YES
4	MAL8P1.148||PF3D7_0802900||conserved Plasmodium protein, unknown function	0.802171	1.49476	0.573144	1.87293	-0.512166	0.086507	-0.18292	-0.121022	-0.791564	0.137939	-0.090436	-0.308136	-0.033782	0.286441	0.01899	-0.597088	YES	NO	YES
4	PFF1290c||PF3D7_0626600||conserved Plasmodium protein, unknown function	1.00553	1.08621	0.770954	1.70836	-0.408877	0.259356	-0.03671	0.132963	-0.515124	-0.272321	0.018682	-0.320293	0.537445	-0.098871	0.106638	-0.322809	YES	NO	NO
4	PFL1735c||PF3D7_1235900||pre-mRNA-splicing factor SYF1, putative (XAB2)	1.47799	2.39175	1.35905	2.24118	-0.035113	0.298649	-0.167658	-0.197793	-1.44279	-0.293172	0.563606	-0.488687	0.010016	0.052282	-0.102404	0.23321	YES	NO	YES
4	PFA0370w||PF3D7_0107400||conserved Plasmodium protein, unknown function	1.02774	2.34187	0.424524	1.48662	-0.186833	0.210253	0.133369	-0.226292	-0.79747	0.999514	0.038468	-0.483693	-0.7909	0.209651	-0.020302	0.047474	YES	NO	NO
4	PF10_0024||PF3D7_1002000||Plasmodium exported protein (hyp2), unknown function	2.23717	1.66759	2.65045	0.546767	-0.242982	0.534422	0.049483	-0.466115	-1.98094	-0.428422	0.771559	0.590547	0.169401	0.438333	-0.388341	-0.24959	YES	NO	NO
4	MAL7P1.29a||PF3D7_0709800||conserved Plasmodium protein, unknown function	1.56921	2.17265	-0.105723	1.55648	-0.232873	0.167115	0.027337	0.056781	-1.13776	-0.111969	0.84344	-0.74666	0.501626	-0.076785	-0.162241	-0.373576	YES	NO	YES
4	MAL7P1.106||PF3D7_0720500||conserved Plasmodium protein, unknown function	1.62163	2.11486	-0.014048	1.68285	-0.3694	0.017361	0.20216	0.129396	-1.10372	0.119312	0.213059	-0.515049	-0.047349	0.444794	0.067101	0.018071	YES	NO	NO
4	PFI1745c||PF3D7_0936100||early transcribed membrane protein	1.68034	1.35285	0.215333	1.77392	-0.970169	-0.265812	-0.066144	-0.05958	-0.662652	-0.511457	0.906918	-0.339119	0.825887	-0.164731	-0.556748	-0.176087	YES	NO	NO
4	PF14_0566||PF3D7_1459300||OPA3-like protein, putative	1.36696	1.24717	-0.003658	0.759242	-0.476408	-0.087556	-0.131588	-0.236138	-1.79705	0.379648	0.593838	-1.13152	0.574598	0.211872	0.111188	0.161971	YES	NO	NO
4	PFF0155w||PF3D7_0603200||mitochondrial chaperone BCS1, putative	1.10193	2.5777	1.09382	1.6862	-0.100722	0.220862	0.255041	0.067559	-0.616456	0.070525	-0.174636	-0.392144	0.13643	0.188849	-0.048097	0.077026	YES	NO	NO
4	PFE1173c||PF3D7_0523500||outer arm dynein lc3, putative	1.05072	0.997161	0.641978	1.12427	-0.370352	0.234825	0.081403	0.373152	-0.274718	0.926744	-0.362172	-0.267471	0.285781	-0.07232	0.026151	-0.282163	YES	NO	YES
4	PF14_0617||PF3D7_1465000||conserved Plasmodium protein, unknown function	2.12791	1.58744	0.296876	1.01132	-0.668291	0.109822	-0.353165	-0.05603	-0.966849	1.13234	0.344182	-0.893261	-0.106704	0.186679	-0.16612	0.377222	YES	NO	NO
4	MAL8P1.15||PF3D7_0828100||conserved Plasmodium protein, unknown function	0.764193	1.65827	0.985043	1.82845	-0.652574	-0.314654	0.036157	0.036698	-0.367688	-0.182769	-0.685494	-0.275005	0.369855	0.180742	0.045269	-0.257825	YES	NO	YES
4	PF11_0385||PF3D7_1137400||UVB-resistance protein UVR8 homologue	0.850983	1.8638	0.789791	1.19017	-0.150101	-0.230927	0.236489	0.074138	-0.066166	-0.484975	-0.322007	-0.08144	-0.701683	-0.055242	0.073673	-0.116889	YES	NO	YES
4	PFC0340w||PF3D7_0308000||DNA polymerase epsilon subunit b, putative	1.36993	1.94931	0.638558	1.4796	-0.012054	-0.073696	-0.030936	0.125087	-0.600361	0.124777	-0.148639	-0.652881	-0.119808	0.17387	0.06869	-0.289719	YES	NO	NO
4	PFE0150c||PF3D7_0503100||4-diphosphocytidyl-2c-methyl-D-erythritol kinase (CMK), putative	1.20326	2.01898	0.280928	1.27089	-0.266092	-0.14861	0.11403	0.140887	-0.154258	-0.409025	-0.262742	-0.801089	-0.173953	0.213579	0.025265	-0.078382	NO	NO	NO
4	Pfa_snoR_12||PF3D7_1109800||small nucleolar RNA snoR12	0.607195	1.90199	2.31133	1.85689	-0.439441	0.392521	0.159255	0.270151	-2.18656	-1.26726	-0.716896	2.21708	0.851799	-0.622913	0.514025	0.550809	YES	NO	NO
4	MAL13P1.77||PF3D7_1315000||conserved Plasmodium protein, unknown function	1.42252	1.70748	1.86014	2.4051	-0.339318	0.13883	-0.002047	-0.231043	-2.18568	-0.532746	0.307809	-0.091491	0.184892	0.363757	0.142819	0.138457	YES	NO	NO
4	PFE1560c||PF3D7_0531200||mitochondrial ribosomal protein S16 precursor, putative	1.20872	1.91127	0.492982	1.64415	-0.24936	-0.139417	0.08214	0.066871	-0.801858	0.055701	-0.125375	-0.454021	2.20816	-0.148594	-0.132147	0.162415	YES	NO	NO
4	MAL13P1.161||PF3D7_1330200||conserved Plasmodium protein, unknown function	1.25514	1.81614	0.700588	1.36791	-0.13365	0.087009	-0.126695	0.129221	-0.503919	-0.030926	0.079041	-0.888875	-1.11663	-0.079792	-0.151624	0.357132	YES	NO	YES
4	PFI1700c||PF3D7_0935200||sec-1 family protein	0.769756	1.74944	0.899248	1.38714	-0.157442	-0.067198	0.030318	-0.354271	-0.940247	-0.275941	0.080093	-0.316516	0.618699	0.221788	0.124375	-0.197119	YES	NO	YES
4	PF13_0174||PF3D7_1332300||sedlin, putative	1.16221	1.09444	1.14647	-0.15327	-0.258502	0.066638	-0.007873	-0.089197	-1.08202	-0.051045	0.12656	-0.723169	0.150968	0.603646	0.079957	0.155434	YES	NO	NO
4	PFC0630w||PF3D7_0315000||zinc finger protein, putative	0.995364	1.67223	0.635462	1.19931	-0.097519	0.076617	0.150085	0.232936	-0.480452	0.385799	-0.330846	-0.417035	-0.002594	-0.034864	0.041073	0.090801	YES	NO	YES
4	PFC0845c||PF3D7_0319100||ubiquitin-protein ligase, putative	1.85824	2.98804	0.542664	2.56354	-0.394127	-0.04202	-0.238478	-0.038653	-1.70105	-0.349704	0.467742	-0.483419	-0.048827	-0.199361	-0.028739	0.324199	YES	NO	NO
4	PFF0580w||PF3D7_0611900||lsm12, putative	1.09313	1.77168	0.72289	2.06484	-0.297398	-0.009957	-0.174287	0.418549	-0.685659	-0.049809	0.238839	-0.39907	-0.396429	-0.070782	-0.032594	0.234387	YES	NO	YES
4	PF14_0576||PF3D7_1460400||ubiquitin carboxyl-terminal hydrolase isozyme L3 (UCHL3)	0.562283	2.12567	1.47345	1.2711	-0.13384	0.102191	0.164119	0.183859	-0.145886	-1.509	-0.121997	0.040578	-1.44497	0.088101	-0.181354	-0.126489	YES	NO	NO
4	PF07_0107||PF3D7_0726100||Plasmodium exported protein, unknown function	0.73458	0.990608	2.23645	1.21807	-0.099261	0.156582	-0.061039	-0.53357	-1.98691	-0.93492	0.346734	0.638048	0.476908	0.386105	0.17723	0.009128	YES	NO	NO
4	PF13_0163||PF3D7_1329600||conserved Plasmodium protein, unknown function	1.40226	1.71654	1.39702	1.505	-0.027364	0.084533	0.246622	-0.322776	-0.94351	-0.517525	0.042026	-0.230666	0.57493	0.192606	0.084325	0.0222	YES	NO	NO
4	MAL13P1.147||PF3D7_1329200||conserved Plasmodium protein, unknown function	1.86515	1.72642	0.535072	0.82134	0.115631	0.224977	-0.20172	-0.11648	-0.489312	0.023514	0.143485	-0.921628	-1.22812	0.237668	-0.100794	-0.062587	YES	NO	NO
4	MAL13P1.317||PF3D7_1363000||conserved Plasmodium protein, unknown function	1.06038	1.52077	1.06215	1.74123	-0.210159	-0.137326	0.06122	-0.265496	-1.06048	-0.46519	-0.081349	0.08796	-0.00103	0.027676	0.276657	-0.269115	YES	NO	NO
4	PF10_0359||PF3D7_1036700||phosducin-like protein, putative (PhLP2)	-0.045166	2.17606	1.02592	1.97836	-0.135401	-0.052767	0.147169	0.208773	-0.175908	-0.651639	-0.209121	0.132992	-0.134264	-0.07415	0.174839	-0.298683	YES	NO	NO
4	PF14_0323||PF3D7_1434200||calmodulin (CAM)	1.35583	1.05441	0.114492	1.13159	-0.125022	0.002376	-0.206024	-0.049504	-0.504704	-0.292478	0.054289	-0.531593	-0.353633	-0.332108	-0.283856	0.695372	YES	NO	NO
4	PFE0855c||PF3D7_0517100||conserved Plasmodium protein, unknown function	0.078712	1.13009	1.49761	0.997995	0.158635	-0.103884	0.096622	0.070595	0.117001	-0.44379	-1.03105	-0.018361	-0.396574	0.242628	0.073972	-0.351472	YES	NO	NO
4	PFD1140w||PF3D7_0424000||Plasmodium exported protein (PHISTc), unknown function	-0.606482	1.86429	1.68752	1.1062	-0.280767	0.200277	0.190053	0.546778	-0.380517	-1.94532	-0.91721	0.573318	0.80354	0.217917	-0.033468	-0.396671	YES	NO	NO
4	PF13_0230||PF3D7_1342200||conserved Plasmodium membrane protein, unknown function	0.036588	1.78343	1.3844	1.22764	-0.43368	-0.50564	0.438089	0.151523	-0.287703	-0.375581	-0.967231	-0.074284	0.437453	0.135091	0.171388	-0.349325	NO	NO	NO
4	Pfa_snoR_38||PF3D7_1421150||small nucleolar RNA snoR38	0.986971	2.78374	2.63791	2.84635	-0.554518	0.303085	0.129018	0.476121	-1.56665	-1.30915	-0.625176	2.06917	-0.082022	-0.514903	0.079039	-0.236105	YES	NO	NO
4	PFL2545c||PF3D7_1252900||Plasmodium exported protein, unknown function	1.307	1.07605	2.86605	-0.119812	-0.550551	0.282922	0.237355	-0.187293	-0.949692	-0.37329	0.045258	0.842151	1.49881	0.369985	0.062075	-0.199165	YES	NO	NO
4	MAL13P1.370||PF3D7_1326900||conserved Plasmodium membrane protein, unknown function	0.817774	1.23728	1.373	1.21781	-0.128131	-0.155006	-0.148209	-0.243972	-1.24722	-0.330662	-0.225623	-0.170702	0.563427	0.510604	0.208324	-0.152809	YES	NO	YES
4	PF11_0282||PF3D7_1127100||deoxyuridine 5'-triphosphate nucleotidohydrolase (dUTPase)	1.40728	2.62361	0.440106	1.39479	-0.28408	0.04887	0.20864	-0.184683	-0.645104	0.517748	-0.658226	-0.866279	-0.30275	0.201422	-0.121387	0.061483	YES	NO	NO
4	PF14_0592||PF3D7_1462200||conserved Plasmodium protein, unknown function	2.00146	2.7706	0.890432	1.49827	-0.541731	0.061935	-0.173736	0.324336	-0.918659	0.040554	-0.027588	-0.664684	0.14645	-0.062855	-0.143075	-0.095133	YES	NO	YES
4	PF11_0370||PF3D7_1135900||3-oxo-5-alpha-steroid 4-dehydrogenase, putative	1.83513	1.61383	0.374333	1.40133	-0.650685	0.22187	-0.140156	0.025142	-0.968491	-0.026522	0.565906	-1.26343	0.997446	0.181946	-0.029544	-0.188841	YES	NO	NO
4	PFE0800w||PF3D7_0516000||RAP protein, putative	0.587815	1.36971	1.32619	1.2966	-0.02853	-0.121263	0.348993	-0.041006	-0.439507	-0.273644	-0.574983	-0.143747	0.280052	-0.060088	0.013251	0.04454	YES	NO	NO
4	PFL0060w||PF3D7_1201200||Plasmodium exported protein (PHISTa-like), unknown function	1.85489	0.991079	2.19745	1.17866	-0.320329	-0.170872	0.026885	-0.871917	-0.732329	-0.23896	1.2341	0.038579	-0.431747	0.188568	-0.215527	0.376301	YES	NO	YES
4	PFB0590w||PF3D7_0213000||conserved Plasmodium protein, unknown function	1.78508	2.21642	0.795724	0.916841	-0.259457	0.002146	-0.08538	-0.084264	-1.18471	0.599123	-0.125845	-0.610901	0.665136	-0.02685	5.18855	0.225667	YES	NO	YES
4	MAL7P1.114||PF3D7_0721400||conserved Plasmodium protein, unknown function	1.24849	2.18225	0.247303	0.801707	-0.416527	-0.034335	0.27662	-0.043361	-0.147251	-0.572353	-0.13318	-1.09714	-0.843243	-0.010747	-0.195946	0.354176	NO	NO	NO
4	Pfa_snoR_16||PF3D7_1304800||small nucleolar RNA snoR16	0.787097	1.33084	1.61315	1.7078	-0.624147	-0.045108	0.187631	0.018762	-1.06303	-0.817392	0.036603	0.757231	0.132436	-0.343734	0.161814	-0.109246	YES	NO	NO
4	PFA0540c||PF3D7_0111200||conserved Plasmodium protein, unknown function	1.45586	2.10797	0.36813	1.26599	-0.271112	0.047226	0.150349	0.218843	-0.556488	0.408466	-0.133716	-0.718213	0.349037	0.106096	0.037353	-0.460429	YES	NO	YES
4	PF11_0141||PF3D7_1113300||UDP-galactose transporter, putative	2.13628	2.11164	-0.015814	0.804809	-0.322362	0.102849	-0.231155	-0.014461	-0.961903	0.552369	0.385811	-1.15027	0.639775	0.243314	-0.022124	0.28058	YES	NO	YES
4	PF13_0328||PF3D7_1361900||proliferating cell nuclear antigen (PCNA)	1.70127	2.77184	0.465256	2.33969	-0.577499	-0.005994	-0.440559	0.03768	-1.10092	0.708371	0.085014	-0.851455	0.377258	-0.152807	-0.096306	0.337668	YES	NO	NO
4	PF14_0686||PF3D7_1471900||conserved Plasmodium protein, unknown function	0.370556	1.05689	1.01847	1.03621	0.11294	-0.372	0.030858	-0.250273	-0.587568	-0.308023	-0.416313	-0.208055	-0.291862	-0.205632	-0.117638	-0.351799	YES	NO	NO
4	PF07_0064||PF3D7_0715800||drug/metabolite exporter, drug/metabolite transporter	1.3577	1.68625	-0.32926	0.96356	-0.442457	0.066775	0.359874	-0.128627	-0.842916	0.32693	-0.187353	-1.03485	0.287299	0.369828	0.13993	0.433972	YES	NO	NO
4	PF14_0013||PF3D7_1401100||DnaJ protein, putative	1.87421	1.16751	2.61523	1.5962	-0.283395	0.026108	-0.098344	-0.795533	-2.02581	-0.715101	0.992948	0.434576	0.287841	0.296122	-0.040792	0.408363	YES	NO	YES
4	PF11_0295||PF3D7_1128400||geranylgeranyl pyrophosphate synthase, putative (GGPPS)	1.11282	1.49606	0.476303	1.57684	-0.265989	-0.146264	-0.111743	0.021235	-0.100758	-0.708159	0.055002	-0.582183	0.28879	0.144248	-0.122047	-0.01908	YES	NO	NO
4	PF10_0297||PF3D7_1030400||conserved Plasmodium protein, unknown function	1.43139	1.22463	0.34954	0.999109	-0.416533	0.109663	0.237545	0.118572	-0.739766	-0.595304	-0.085768	-0.109109	-1.42193	-0.01369	-0.142737	-0.593824	YES	NO	YES
4	PF13_0231||PF3D7_1342300||tetratricopeptide repeat family protein, putative	2.05384	2.796	0.548362	1.43423	-0.247788	-0.310039	-0.030543	0.05074	-0.804585	0.201322	-0.027774	-0.8838	0.309106	0.252635	0.010877	-0.260614	YES	NO	NO
4	PFI1617w||PF3D7_0933400||conserved Plasmodium protein, unknown function	1.30457	2.2217	0.347984	1.615	-0.009252	-0.1069	0.102742	-0.148459	-1.42972	0.496038	0.012806	-0.883646	0.622273	-0.290974	-0.169816	-0.15852	YES	NO	YES
4	MAL7P1.110||PF3D7_0720800||Ham1-like protein, putative	0.989203	1.99881	0.731059	1.42222	-0.037086	0.022025	-0.063645	-0.095397	-0.302855	-0.599924	-0.274078	-0.297824	-0.046812	0.01877	0.009848	-0.121595	YES	NO	NO
4	PF13_0146||PF3D7_1325800||conserved Plasmodium protein, unknown function	-1.01012	1.16142	1.39291	1.33799	0.247954	-0.42011	0.32188	0.100876	0.180671	-1.10728	-1.27999	-0.015562	-0.103422	0.189259	-0.05656	-0.156761	YES	NO	NO
4	PF11_0308||PF3D7_1129700||conserved Plasmodium protein, unknown function	1.76312	2.07111	0.181822	1.84171	-0.317793	0.172376	-0.492733	0.206768	-1.63433	0.098491	0.192743	-1.12483	0.692993	0.129946	0.240467	0.038473	YES	NO	NO
4	PF11_0506||PF3D7_1149000||antigen 332, DBL-like protein (Pf332)	-2.97053	1.59412	0.876706	1.18029	0.200874	-0.101352	0.142502	-0.30742	0.584892	-1.52912	-1.22434	0.036818	-0.266204	-0.436831	0.08868	0.208619	YES	NO	NO
4	PFL0050c||PF3D7_1201000||Plasmodium exported protein (PHISTb), unknown function	-1.29885	1.53497	0.950523	1.62168	-0.343629	0.077112	0.34478	0.973783	0.773373	-2.37372	-1.48349	0.538853	0.753096	0.313875	0.153042	-0.59517	YES	NO	YES
4	PFL1005c||PF3D7_1220900||heterochromatin protein 1 (HP1)	1.58671	1.59931	-0.345318	1.09532	-0.473202	0.239922	0.181002	-0.341622	-0.66325	-0.421667	0.760136	-0.960669	-0.245176	-0.208704	-0.209683	0.54351	YES	NO	NO
4	PF13_0192||PF3D7_1334500||conserved Plasmodium protein, unknown function	0.376813	2.13918	0.974187	1.30992	-0.139295	0.218738	0.122276	0.304925	-0.29237	-0.658986	-1.27323	-0.456159	0.826061	0.271902	0.222083	-0.259741	YES	NO	NO
4	MAL7P1.59||PF3D7_0713200||RESA-like protein	0.685925	1.41716	2.48617	1.92211	-0.410102	-0.311934	-0.064476	-0.292546	-1.00429	-1.23361	0.132465	0.113248	-0.556478	-0.051693	-0.406981	-0.289695	YES	NO	NO
4	PF14_0705||PF3D7_1473600||conserved Plasmodium protein, unknown function	0.736666	1.65725	1.68955	1.96605	-0.432702	-0.328519	0.255052	0.759413	-0.195673	-0.759947	-1.33242	-0.049219	0.687522	-0.176885	-0.14214	-0.35543	NO	NO	NO
4	RNAzID:1537||PF3D7_1304800||putative ncRNA	1.12041	1.62622	2.26348	1.75285	-0.624147	-0.045108	0.187631	0.018762	-1.22593	-0.819792	-0.155742	0.49206	0.132436	-0.343734	0.161814	-0.109246	YES	NO	YES
4	MAL7P1.139||PF3D7_0725200||mago nashi protein homolog, putative	0.713875	1.12169	1.24492	1.15792	-0.598329	0.08118	-0.004752	0.144657	-0.356786	-0.961602	-0.034908	-0.551671	0.631432	0.14557	-0.315615	-0.086833	YES	NO	NO
4	MAL7P1.177||PF3D7_0731700||Plasmodium exported protein (hyp9), unknown function	1.5165	2.29758	1.53168	1.7288	-0.53707	0.242775	0.003282	0.249209	-0.370338	-0.467449	-0.339232	-0.770592	0.662302	0.037046	-0.195646	-0.295422	YES	NO	NO
4	PFD1090c||PF3D7_0423100||clathrin assembly protein, putative	1.20872	1.99713	0.868956	1.81953	-0.28056	0.025196	-0.327722	-0.221065	-1.09034	-0.608619	0.362733	-0.595551	0.060794	-0.133458	-0.373725	-0.004421	YES	NO	YES
4	PF14_0127||PF3D7_1412800||N-myristoyltransferase (NMT)	1.52559	0.899415	0.880721	1.81603	-0.360433	0.100345	-0.137616	0.114935	-1.53911	-0.611613	0.34072	-0.624425	0.895841	0.289705	-0.087637	0.011014	YES	NO	YES
4	PFL0565w||PF3D7_1211400||heat shock protein DNAJ homologue Pfj4 (PfJ4)	1.53414	1.5373	0.875338	2.89596	-0.305585	0.091392	-0.213744	-0.694172	-2.21835	-0.406592	0.69552	-1.27261	0.466655	-0.119735	-0.245127	0.251431	YES	NO	NO
4	PF14_0023||PF3D7_1402100||conserved Plasmodium protein, unknown function	-0.21501	1.28541	1.61249	1.09378	-0.136209	-0.395603	0.282495	-0.029304	-0.337311	-0.71154	-0.534633	0.402093	-0.184652	-0.213996	0.02291	-0.411295	YES	NO	YES
4	MAL8P1.107||PF3D7_0810700||conserved Plasmodium protein, unknown function	-0.19592	1.67272	1.13083	0.94877	-0.208045	-0.075915	0.13083	0.502126	-0.183518	-1.73884	-0.381794	-0.579696	-0.526062	0.15403	0.190969	-0.517881	YES	NO	YES
4	PFL1200c||PF3D7_1224900||splicing factor 3b subunit, putative (SF3B14)	0.984011	1.3737	1.03564	0.927793	-0.405756	-0.00174	0.108593	-0.062912	-1.16208	-0.805901	0.219344	-0.476663	-0.004742	0.09415	-0.378948	0.262482	YES	NO	YES
4	PFF0345w||PF3D7_0607000||translation initiation factor IF-2, putative	-0.370238	1.50501	1.18313	1.03226	-0.452228	-0.087744	-0.256325	-0.04798	-0.333567	-0.788179	-0.32093	0.047768	0.096251	0.299427	-0.093235	-0.30031	YES	NO	NO
4	PFF1360w||PF3D7_0628000||6-pyruvoyltetrahydropterin synthase (PTPS)	0.511842	2.07614	1.13087	0.984426	0.116842	-0.033092	0.150796	0.464603	-0.422762	-0.76221	-0.495512	-0.472156	0.038852	0.201752	0.096056	-0.330175	YES	NO	YES
4	PFB0420w||PF3D7_0209300||2C-methyl-D-erythritol 2,4-cyclodiphosphate synthase (IspF)	0.526026	1.07127	1.26034	1.41303	-0.481576	-0.11751	-0.134091	0.292879	-0.727819	-0.395116	-0.063003	-1.29957	-0.321958	0.068351	-0.109846	0.019191	YES	NO	NO
4	PF11_0425||PF3D7_1141400||phosphatidylinositol N-acetylglucosaminyltransferase subunit H, putative (PIGH)	1.30697	1.98292	0.388023	0.725774	-0.321567	-0.311437	-0.421563	-0.079143	-0.730126	0.947029	-0.4671	-0.95141	0.044604	-0.410536	-0.094114	0.200444	YES	NO	NO
4	PFL2395c||PF3D7_1249900||apicoplast dimethyladenosine synthase, putative	0.824058	1.83287	0.608732	1.31878	0.019216	-0.018609	-0.265252	-0.257041	-0.957674	-0.509985	-0.191909	-0.268016	-0.167296	-0.111809	0.224003	0.004443	YES	NO	NO
4	PFL2025w||PF3D7_1242100||conserved Plasmodium protein, unknown function	1.71439	1.83172	0.936489	1.02924	-0.335619	-0.160036	0.018832	0.135095	-0.074808	-0.918249	-0.314165	-0.957161	-0.345172	0.295344	-0.127063	-0.332502	YES	NO	NO
4	PFL1975c||PF3D7_1241100||conserved Plasmodium protein, unknown function	1.54183	1.68833	1.31956	1.82261	-0.317241	-0.091365	0.077517	-0.022953	-1.1544	-0.809556	0.037164	-0.280732	0.77713	0.328263	-0.036883	0.071328	YES	NO	YES
4	PF13_0087||PF3D7_1315700||1-methyladenosine tRNA methyltransferase subunit, putative	1.41619	1.36404	1.33166	0.795354	-0.375578	0.136286	0.275329	0.164412	-0.535412	-1.11178	-0.446321	-0.4908	0.59912	0.127004	-0.004638	-0.076403	YES	NO	NO
4	PF11_0514||PF3D7_1149700||Plasmodium exported protein (PHISTa), unknown function	-0.955043	0.721783	2.11196	1.85809	0.335916	-0.063027	0.737384	0.320014	-0.290699	-2.30294	-0.614709	0.294705	0.65306	0.045301	0.008574	-0.429728	YES	NO	NO
4	PFE1365w||PF3D7_0527400||conserved Plasmodium protein, unknown function	1.40985	0.689274	0.526909	1.5375	-0.16847	0.109792	-0.017388	0.087168	-1.79905	-0.872063	0.713514	-1.09952	0.678682	0.312013	0.114349	0.115147	YES	NO	NO
4	PF13_0073||PF3D7_1301400||Plasmodium exported protein (hyp12), unknown function	0.713642	1.12302	1.70439	2.95795	-0.062254	0.177414	0.621458	-0.310895	-1.18255	-1.74743	0.134691	-0.038043	0.437199	-0.123114	0.279607	-0.092182	YES	NO	YES
4	PF13_0016||PF3D7_1303100||methyltransferase-like protein, putative	0.90395	2.59435	1.24032	1.28589	-0.363834	-0.18882	0.257875	-0.130022	-0.873601	-0.419463	-0.417369	-0.991776	-0.276524	-0.152879	-0.169039	0.068377	YES	NO	NO
4	MAL7P1.205||PF3D7_0706600||conserved Plasmodium protein, unknown function	0.801697	2.15373	1.68324	1.91103	-0.323824	-0.199584	0.315948	0.378218	-0.518042	-0.785351	-0.943856	-0.000882	0.135143	-0.120004	0.330122	-0.364161	NO	NO	NO
4	MAL13P1.139a||PF3D7_1325700||conserved Plasmodium protein, unknown function	1.12702	1.67284	0.45066	0.966164	-0.479817	-0.25638	0.320035	-0.036616	-0.8294	0.438818	-0.327882	-1.25914	0.320866	0.112158	-0.099734	-0.040819	YES	NO	NO
4	PFE0040c||PF3D7_0500800||mature parasite-infected erythrocyte surface antigen,erythrocyte membrane protein 2 (MESA)	-0.137345	3.02178	1.47442	1.98867	-0.428568	-0.663701	-0.097231	0.09802	0.565819	-1.53778	-1.03944	-1.02338	-0.662287	-0.365758	-0.176319	-0.397744	YES	NO	NO
4	PFL0140w||PF3D7_1202800||conserved Plasmodium protein, unknown function	1.40173	1.90782	0.823642	1.83429	-0.41836	0.093545	0.242067	0.136287	-1.33407	-0.684095	-0.015186	-0.716385	0.484782	0.226643	0.180132	-0.031638	YES	NO	YES
4	PF07_0033||PF3D7_0708800||heat shock protein 110 (HSP110c)	-0.025599	1.22881	0.926298	1.54383	0.057874	-0.011672	0.422919	-0.2751	-0.326161	-0.990666	-0.60927	0.044573	1.02398	-0.078073	-0.163724	0.08769	YES	NO	YES
4	PF13_0033||PF3D7_1306400||26S proteasome regulatory subunit, putative	1.47408	1.71496	0.070802	1.51317	-0.337002	-0.243063	-0.091406	-0.14113	-1.1321	-0.65059	0.414205	-0.979934	-0.245662	-0.44129	-0.278649	0.616941	YES	NO	YES
4	PF08_0006||PF3D7_0829200||prohibitin, putative	-0.285194	1.26056	0.774862	1.33326	-0.276538	-0.029638	0.419713	0.068218	-0.101151	-1.34784	-0.638383	0.05336	0.526827	0.456686	0.176451	-0.15103	YES	NO	NO
4	PF13_0017||PF3D7_1303300||conserved Plasmodium protein, unknown function	1.02547	1.17674	0.975888	0.896369	-0.458659	-0.117645	0.106512	0.00432	-0.502565	-0.85143	-0.844916	-0.506275	0.485963	0.271478	0.19052	-0.249294	NO	NO	NO
4	PF11_0508||PF3D7_1149100||Plasmodium exported protein, unknown function	-0.403496	1.7534	1.53415	1.77988	-0.394225	0.064682	0.116752	0.02704	-0.394497	-0.961051	-1.23223	-0.343312	0.029195	-0.361714	-0.187647	0.150416	YES	NO	YES
4	PF11_0351||PF3D7_1134000||heat shock protein 70 (Hsp70-3)	-0.117965	1.53753	1.11024	1.40364	-0.215286	0.070941	0.291895	-0.566726	-0.139446	-1.22949	-0.434994	-0.024443	-0.011961	-0.097049	0.153392	0.08825	YES	NO	NO
4	PFE0135w||PF3D7_0502800||DnaJ protein, putative	1.04574	0.506349	1.08121	0.966948	-0.460331	0.26209	0.190064	0.517388	-0.504355	-1.23524	-1.05778	0.248186	1.1489	0.137546	0.165607	-0.39398	YES	NO	NO
4	PFB0075c||PF3D7_0201500||Plasmodium exported protein (hyp9), unknown function	0.365322	1.25813	1.03559	2.10465	0.221686	-0.002728	0.344928	0.211674	-0.417114	-1.6482	-0.450241	-0.638425	-0.321028	0.106014	0.384517	0.424006	YES	NO	YES
4	PFI1175c||PF3D7_0923900||RNA binding protein, putative	1.27464	1.10774	0.314059	1.3371	-0.150848	-0.065438	0.296397	-0.218493	-1.57467	-1.00244	0.08466	-0.494872	-0.277457	-0.211878	-0.084924	0.537563	YES	NO	YES
4	PF14_0324||PF3D7_1434300||Hsp70/Hsp90 organizing protein (HOP)	0.245454	1.43232	1.06134	1.13921	-0.177788	-0.144081	-0.359347	-0.310655	-0.333926	-1.0771	-0.433253	0.199757	0.130092	-0.181268	-0.088463	-0.087915	YES	NO	YES
4	PFC0785c||PF3D7_0317800||proteasome regulatory protein, putative	1.47904	2.179	0.996105	2.47616	0.024636	-0.132098	-0.102149	-0.016816	-0.657011	-0.773826	-0.154489	-0.550047	0.224384	-0.09741	-0.109194	0.055679	YES	NO	YES
4	MAL7P1.75||PF3D7_0715500||mitochondrial ATP synthase F1, epsilon subunit, putative	2.25944	3.51388	0.925565	2.42343	-0.522137	0.141132	0.048045	0.115502	-1.5893	0.535423	-0.515929	-0.917684	-1.13306	-0.021376	0.108952	0.122179	YES	NO	NO
4	MAL8P1.49||PF3D7_0822200||conserved Plasmodium membrane protein, unknown function	-0.056188	0.75383	1.54638	1.52145	-0.539557	-0.133161	0.388271	-0.054171	-0.886707	-0.554284	-0.696228	-0.018013	0.228321	0.081931	0.036933	-0.585615	YES	NO	NO
4	PF07_0092||PF3D7_0722600||nucleolar rRNA processing protein, putative	0.976185	1.3562	1.36431	0.930195	0.018365	0.055975	0.040842	-0.29422	-1.06021	-0.726612	-0.247149	-0.684154	0.556167	0.216541	0.064249	0.178839	YES	NO	YES
4	PFD0745c||PF3D7_0415400||nonclathrin coat protein zeta2-cop-related protein, putative	1.59275	1.20735	0.666288	2.01043	-0.26052	0.230765	0.057214	-0.039037	-1.59151	-0.839394	0.186056	-1.10002	-0.269513	0.332309	0.126834	0.502802	YES	NO	YES
4	PF13_0158||PF3D7_1327700||regulator of nonsense transcripts 3B, putative (UPF3B)	-0.078586	1.08903	1.19051	1.72235	-0.302942	-0.175602	0.350139	-0.000641	-1.62481	-0.739168	-0.351932	-0.442255	1.12895	0.081856	0.096284	-0.432656	YES	NO	NO
4	PF10_0019||PF3D7_1001500||early transcribed membrane protein 10.1 (ETRAMP10)	1.40106	-0.136322	2.73808	2.96383	-0.557614	0.527807	-0.061418	-0.780765	-1.6359	-2.10039	1.16741	-0.526571	-0.403468	-0.280034	-0.169509	0.253932	YES	NO	NO
4	MAL13P1.185||PF3D7_1337100||protein kinase 6 (PK6)	0.675629	2.65726	2.04258	1.9568	-0.332894	-0.22824	0.419562	0.003157	-0.486861	-1.04193	-0.655082	-0.450512	0.972079	0.073573	0.086778	-0.303892	YES	NO	YES
4	PF11_0183||PF3D7_1117700||GTP-binding nuclear protein ran/tc4 (RAN)	1.62849	1.55694	0.087094	2.22552	-0.465332	0.000262	0.014414	-0.607157	-2.1085	-0.87551	0.589467	-1.04534	-0.112397	-0.498678	-0.447482	0.716774	YES	NO	NO
4	PFB0870w||PF3D7_0218600||conserved Plasmodium protein, unknown function	0.768113	1.50896	1.66101	-0.242496	0.050122	0.039615	-0.011692	0.13913	-0.415011	-1.26745	-0.678646	-0.314623	0.303062	0.185236	0.067027	0.337843	YES	NO	NO
4	PFI0585c||PF3D7_0912000||conserved Plasmodium protein, unknown function	1.72166	1.3619	0.606155	0.708202	-0.132531	-0.015172	0.077233	0.02202	-0.936495	-0.614642	-0.532336	-0.67407	1.07953	0.360928	0.217144	0.011748	YES	NO	NO
4	PF14_0640||PF3D7_1467200||conserved Plasmodium protein, unknown function	0.589133	1.06323	1.55876	1.53977	-0.201806	-0.050945	0.26577	0.194735	-1.19712	-0.840202	-0.604532	0.309117	1.3925	-0.019794	-0.022939	-0.45878	YES	NO	NO
4	PF13_0083||PF3D7_1314600||lipoate protein ligase a type 1 (LplA1)	0.761658	1.0221	1.01588	1.34614	-0.513818	-0.016969	0.179818	0.10383	-0.576432	-0.988458	-0.721956	-0.176138	-0.236511	0.059701	0.067022	-0.321396	YES	NO	NO
4	PF14_0730||PF3D7_1476200||Plasmodium exported protein (PHISTb), unknown function	-0.918385	2.94233	2.27104	1.88675	-0.134391	-0.207873	0.281011	0.291544	-0.028356	-3.42298	-1.47942	0.158462	-0.369292	-0.112887	0.186763	-0.472919	YES	NO	NO
4	PFI0145w||PF3D7_0903000||conserved protein, unknown function	1.1041	2.02117	0.410678	1.36182	-0.366863	-0.079951	0.107788	-0.052553	-1.33743	-0.901056	0.023418	-0.749619	-0.916907	-0.090734	-0.214478	-0.00589	NO	NO	NO
4	PFL2425w||PF3D7_1250500||adaptor-related protein complex 3, sigma 2 subunit, putative	0.909401	1.58942	1.10293	0.443889	-0.406997	-0.029662	0.186859	-0.085568	-0.510415	-1.12091	-0.156518	-0.927528	-0.206723	0.096276	-0.175953	-0.127807	YES	NO	YES
4	PFB0490c||PF3D7_0210900||conserved Plasmodium protein, unknown function	0.896015	1.24388	0.662833	1.13764	-0.47433	0.041761	0.130127	-0.294534	-0.554704	-1.11098	-0.499047	-0.576962	-0.086493	-0.224789	0.303371	0.484665	YES	NO	NO
4	PFA0115w||PF3D7_0102300||Plasmodium exported protein, unknown function	1.13414	2.48993	0.288017	1.36921	-0.428793	-0.194154	0.512756	-0.229074	-1.64979	0.206479	-1.04495	-1.07803	0.889735	0.210897	-0.116505	-0.014376	YES	NO	YES
4	MAL7P1.98||PF3D7_0719000||conserved Plasmodium protein, unknown function	0.575111	1.55274	0.970399	2.35888	-0.402179	-0.048481	0.371234	-0.220426	-1.32494	-0.473963	-0.462844	-0.519528	-0.082688	0.036865	-0.134227	-0.078414	YES	NO	YES
4	PFL0460w||PF3D7_1209200||U6 snRNA-associated Sm-like protein LSm7, putative (LSM7)	0.607412	1.16503	0.924314	1.11468	-0.365268	0.182774	0.096185	0.003914	-1.02414	-0.966147	-0.156785	-0.179126	0.79775	-0.405573	-0.197647	0.140394	YES	NO	NO
4	PFC0560c||PF3D7_0313400||conserved Plasmodium protein, unknown function	-0.66797	0.967177	1.05042	1.08996	0.187163	-0.116819	0.204437	0.050307	-1.14831	-1.05838	-0.304196	-0.465083	-0.432903	0.239888	0.31793	-0.202164	YES	NO	NO
4	PFL0845w||PF3D7_1217500||conserved Plasmodium protein, unknown function	1.3027	0.537339	0.746233	1.44506	-0.14278	0.213261	0.407977	-0.765056	-2.17598	-0.748345	-0.491555	-0.945423	0.584589	0.046053	0.444835	0.614948	NO	NO	NO
4	PF13_0319||PF3D7_1360400||conserved Plasmodium protein, unknown function	0.486885	1.46764	1.52021	1.32581	-0.413058	0.062351	0.477366	-0.140946	-0.820123	-0.940149	-0.752387	-0.478746	0.310025	0.31809	-0.026064	-0.333918	YES	NO	YES
4	PF14_0167||PF3D7_1416900||prefoldin subunit 2, putative	1.36494	1.83677	1.17543	1.01405	-0.48328	-0.080339	0.433557	0.181525	-0.640568	-1.12196	-0.66336	-0.22749	0.36086	-0.431348	-0.106864	0.003096	YES	NO	NO
4	PF10_0054||PF3D7_1005100||conserved protein, unknown function	0.307955	1.5314	1.27696	1.04574	-0.336365	-0.132219	-0.068631	-0.084708	-0.989983	-0.916144	-0.331587	-0.274061	-0.423606	0.215188	0.141492	0.018825	YES	NO	YES
4	PF14_0661||PF3D7_1469300||small subunit rRNA processing KH domain protein, putative	0.8441	1.21195	0.600878	1.4505	-0.36289	-0.335129	0.413803	-0.407204	-1.42135	-0.913481	-0.113054	-0.604954	-0.298838	-0.215785	0.027227	0.130721	YES	NO	NO
4	PFE1245w||PF3D7_0525000||zinc finger protein, putative	-0.495705	1.76614	1.51375	0.736255	-0.124405	0.270418	0.024815	-0.198361	-0.124426	-2.18778	-1.13412	-0.59166	0.665456	0.461946	0.261374	-0.290526	YES	NO	YES
4	PFF0880c||PF3D7_0618200||conserved Plasmodium protein, unknown function	-0.244538	1.21486	0.882939	1.18661	-0.07154	0.027778	0.23044	-0.039094	-0.717681	-1.18397	-0.32938	-0.551324	-0.806632	-0.493037	0.054815	0.258549	NO	NO	NO
4	PFB0888w-a||PF3D7_0219400||ribosome associated membrane protein RAMP4, putative	1.54087	1.84314	0.236082	1.71313	-0.503194	0.360435	0.097554	0.17174	-1.41388	-0.902697	0.027787	-0.991123	0.900823	0.110328	0.127064	0.337021	YES	NO	NO
4	PF10_0274||PF3D7_1028000||methyltransferase, putative	-0.239226	0.958191	1.09091	1.82115	-0.156055	0.075275	0.364377	-0.164997	-0.59758	-1.42585	-0.690825	0.093979	0.784347	-0.022712	0.31022	-0.022186	YES	NO	YES
4	MAL13P1.61||PF3D7_1301700||Plasmodium exported protein (hyp8), unknown function (GEXP07)	0.545523	-0.15552	3.59552	1.55418	-0.356979	0.385406	0.350359	-0.215807	-2.11726	-1.70626	-0.046951	0.091526	0.736681	0.381312	-0.083445	0.24572	YES	NO	YES
4	MAL8P1.17||PF3D7_0827900||protein disulfide isomerase (PDI8)	1.17613	1.30605	-0.236961	1.61548	-0.470366	0.545031	0.150214	-0.317053	-1.24239	-0.906376	0.216207	-0.668033	0.349117	-0.180892	-0.162565	0.476136	YES	NO	NO
4	PFE0590w||PF3D7_0511900||conserved Plasmodium protein, unknown function	0.151528	1.13154	1.77849	2.04503	-0.362457	-0.120677	0.241955	0.077366	-0.761555	-1.22124	-0.643316	-0.011727	-0.508479	0.186202	0.467749	-0.41163	YES	NO	NO
4	PFD0890w||PF3D7_0418400||conserved Plasmodium protein, unknown function	1.19188	1.23123	-0.155871	2.1221	-0.205486	0.209151	0.102683	0.118106	-0.756182	-1.7363	-0.801329	-0.442574	-0.103645	0.342061	-0.071397	-0.049913	YES	NO	NO
4	PFA0615w||PF3D7_0112900||Plasmodium exported protein, unknown function	-0.199199	3.18801	1.63286	2.46762	-0.304541	-0.649314	-0.056099	-0.952159	-0.566896	-1.30811	-1.19485	-1.04691	0.240464	-1.2715	-0.177186	0.504687	YES	NO	YES
4	PF10_0225||PF3D7_1023200||orotidine monophosphate decarboxylase (OMPDC)	0.724921	1.48985	1.66138	2.22021	-0.248404	-0.285254	0.184492	-0.276134	-1.4467	-0.92123	-0.091862	-0.595369	-0.268331	-0.001418	0.074241	-0.048753	YES	NO	NO
4	PFE0610c||PF3D7_0512300||CDK-activating kinase assembly factor (MAT1)	1.50573	1.20116	0.560366	1.56498	-0.071901	0.262778	-0.103837	0.241692	-1.25942	-0.985246	-0.352534	-0.542018	0.190272	0.40955	0.106754	0.406723	YES	NO	NO
4	PFL1185c||PF3D7_1224600||cytochrome c heme lyase, putative	1.04907	1.65128	2.15719	2.75733	-0.242291	-0.035725	0.232141	-0.097242	-1.07972	-1.54631	-0.748215	-0.07917	0.226549	-0.154835	-0.085483	-0.222694	YES	NO	NO
4	PFL0415w||PF3D7_1208300||mitochondrial ACP precursor, putative	0.965197	2.82653	1.18854	1.95438	-0.372506	-0.12283	0.418468	0.007455	-1.04114	-0.917194	-0.416886	-0.561663	-0.126696	-0.187208	0.001267	0.152493	YES	NO	NO
4	PF14_0449||PF3D7_1447100||conserved Plasmodium protein, unknown function	1.04968	1.66857	1.56864	1.96398	-0.281984	0.317704	-0.019748	-0.292374	-1.25044	-1.04263	0.084926	-0.755967	-0.592411	-0.264741	0.126824	0.340214	YES	NO	NO
4	PF10_0324||PF3D7_1033300||conserved Plasmodium protein, unknown function	0.874044	1.7657	0.739939	2.04663	-0.447845	0.750414	0.379088	-0.02465	-0.671922	-1.31268	-0.780711	-0.651147	-0.307128	-0.080397	-0.12913	0.105275	YES	NO	NO
4	MAL13P1.265||PF3D7_1352300||conserved Plasmodium protein, unknown function	1.69574	2.04548	0.521941	1.25441	-0.323455	-0.311968	0.1522	0.142449	-2.02175	-0.365191	-0.660996	-1.22991	0.070525	0.197754	0.128618	0.02982	YES	NO	NO
4	PF08_0135||PF3D7_0801500||conserved Plasmodium protein, unknown function	0.704863	1.02013	1.56783	1.16758	-0.356749	-0.014187	0.324002	-0.193614	-1.26271	-1.27189	-0.52013	0.315896	0.595152	0.247075	0.085083	-0.164613	YES	NO	YES
4	PF11_0458||PF3D7_1144600||conserved Plasmodium protein, unknown function	0.697794	1.3315	1.53724	1.15617	-0.216782	-0.002103	-0.09048	-0.384243	-1.50107	-0.888898	-0.249199	-1.05723	0.487417	0.18734	0.126933	0.266297	YES	NO	NO
4	PF11_0255||PF3D7_1124400||U6 snRNA-associated Sm-like protein LSm1, putative (LSM1)	0.93429	1.16424	0.667192	2.25961	-0.369252	0.097377	0.074569	-0.083774	-1.88944	-1.13399	0.13208	-0.841938	1.00923	0.384674	-0.082282	-0.446936	YES	NO	NO
4	PFC1011c||PF3D7_0322700||conserved Plasmodium protein, unknown function	0.538629	1.75493	1.43904	0.782689	0.21588	-0.357719	-0.273782	-0.061183	-1.93626	-0.801892	-0.382929	-0.940319	0.211751	0.154053	0.14493	0.184444	YES	NO	YES
4	PFI1090w||PF3D7_0922200||S-adenosylmethionine synthetase (SAMS)	1.4765	0.65043	-0.463221	1.85566	-0.562796	0.52946	-0.170395	-0.317771	-2.00617	-0.435505	0.043141	-1.54768	0.740562	0.389997	-0.473314	0.651895	YES	NO	NO
4	PFD0565c||PF3D7_0411400||DEAD box ATP-dependent RNA helicase, putative	0.550164	1.86136	1.63705	2.20019	-0.308486	-0.245953	0.086128	0.090054	-1.01358	-1.04571	-0.594181	-0.315902	1.03117	0.0688	0.329118	-0.420013	YES	NO	NO
4	MAL7P1.174||PF3D7_0731300||Plasmodium exported protein (PHISTb), unknown function (PfG174)	0.993503	0.036694	1.33315	2.96736	0.119939	0.515023	0.21699	-0.66234	-0.871027	-2.11755	-0.628702	-0.735262	0.052645	0.01261	0.293202	0.719049	YES	NO	YES
4	PF11_0305||PF3D7_1129400||RNA methyltransferase, putative	-0.010012	1.50628	1.8751	1.63267	-0.134968	-0.136993	0.08706	-0.287883	-1.24141	-0.982914	-0.581872	0.03927	0.105711	-0.150264	-0.1165	0.030872	YES	NO	NO
4	PF14_0605||PF3D7_1463700||cyclin homologue (CYC1)	0.341846	1.69251	1.38589	0.82331	-0.005282	-0.044356	0.127812	-0.409834	-1.63613	-0.996866	-0.325495	-0.563274	0.281394	0.0966	1.1789	-0.130415	NO	NO	NO
4	PFI1696c||PF3D7_0935100||conserved protein, unknown function	1.44894	1.58487	0.256426	2.01946	-0.381543	0.236151	-0.04553	-0.271073	-1.53721	-1.03061	-0.188672	-1.16633	0.528025	0.1648	0.043994	0.000835	YES	NO	YES
4	PFI0965w||PF3D7_0919700||pyridoxal 5'-phosphate dependent enzyme class III, putative	0.248758	1.52325	1.37853	0.921362	-0.29802	-0.283705	0.360322	0.208684	-0.877267	-1.24871	-0.551628	-0.467996	-0.715579	0.129124	0.237778	-0.11207	YES	NO	YES
4	PF13_0065||PF3D7_1311900||vacuolar ATP synthase subunit a (vapA)	1.13098	1.16087	0.452722	1.27586	-0.343386	0.340763	-0.068272	0.051798	-1.15256	-1.13622	0.118712	-0.71323	-0.09462	0.357143	-0.078747	0.376413	NO	NO	NO
4	PFI1030c-a||PF3D7_0921000||ubiquitin conjugating enzyme, putative	1.48411	1.88632	0.801986	2.28911	-0.70908	0.240876	0.278909	0.186034	-1.34181	-0.937029	-0.08029	-0.74552	-0.153075	0.018585	-0.046973	0.054395	YES	NO	NO
4	PF11_0296||PF3D7_1128500||conserved protein, unknown function	0.515489	1.55507	1.32733	1.83852	-0.131054	-0.083185	-0.014135	0.116399	-1.20411	-1.22834	-0.401194	-0.257655	0.697209	0.143208	0.033412	-0.168443	YES	NO	NO
4	PF14_0411||PF3D7_1443300||U6 snRNA-associated Sm-like protein LSm5, putative (LSM5)	1.291	1.85882	0.830689	2.71603	-0.40105	-0.01252	-0.082317	-0.266681	-1.80116	-1.44445	0.026846	-0.61425	-0.539255	-0.572809	-0.381281	0.027962	YES	NO	YES
4	PFD0810w||PF3D7_0416800||small GTP-binding protein sar1 (SAR1)	1.15333	1.24944	-0.238299	1.70656	-0.597985	0.052664	-0.163104	-0.340113	-1.49483	-1.29012	0.292976	-1.03041	-0.049687	-0.272021	-0.488775	0.483733	YES	NO	YES
4	PFE1035c||PF3D7_0520600||bis(5'-nucleosyl)-tetraphosphatase [asymmetrical]	0.520191	1.58962	2.19918	1.58368	-0.411479	-0.132807	0.188032	-0.188192	-0.850306	-1.35337	-0.980446	-0.122726	0.02564	-0.179894	-0.030754	0.03145	YES	NO	YES
4	MAL8P1.40||PF3D7_0823200||RNA binding protein, putative	0.939469	1.09896	1.11039	1.81644	-0.238665	0.207736	0.279113	-0.039538	-1.08177	-1.40012	-0.365728	-0.673182	0.355976	0.051204	0.0548	0.759624	YES	NO	YES
4	PFA0145c||PF3D7_0102900||aspartate--tRNA ligase	0.094593	1.55477	0.959366	1.67327	-0.256812	-0.04558	0.126953	-0.15431	-0.78061	-1.5202	-0.530817	-0.552802	-0.323899	0.014763	-0.072814	0.06966	YES	NO	NO
4	PF10_0017||PF3D7_1001300||Plasmodium exported protein (PHISTa), unknown function	2.02663	4.19649	1.40763	3.11425	-0.288074	0.041788	0.258968	0.237268	-1.57739	-0.682021	-0.725682	-1.23928	1.11642	0.231909	-0.171171	-0.294353	YES	NO	NO
4	PF07_0070||PF3D7_0716900||drug metabolite transporter, putative	0.34052	1.70495	1.38837	0.717297	-0.625929	0.112969	0.250932	0.175922	-1.01629	-1.2488	-0.514882	-1.21084	0.801316	0.59858	0.220022	-0.079626	YES	NO	NO
4	PFD0805w||PF3D7_0416600||prohibitin-like protein, putative	1.42461	1.91241	1.27248	0.370414	-0.172789	-0.048905	0.180612	-0.009804	-0.854934	-1.75576	-1.17501	-0.907024	-0.250344	-1.69524	-0.449894	-0.716007	YES	NO	NO
4	PFE0730c||PF3D7_0514600||ribose 5-phosphate epimerase, putative	-1.008	1.66438	2.35266	0.979553	-0.227983	0.065712	-0.035351	0.090676	-1.06993	-1.24162	-0.717985	-0.686504	0.371166	0.515729	0.178581	-0.354339	YES	NO	NO
4	PFF0090w||PF3D7_0601900||conserved Plasmodium protein, unknown function	0.678182	0.850356	1.26822	3.15082	-0.301467	0.526191	0.306493	-0.346483	-1.46823	-2.40375	-0.032584	-0.944545	0.116907	0.007352	0.102599	0.381693	YES	NO	YES
4	PFL0430w||PF3D7_1208600||mitochondrial import inner membrane translocase subunit tim10, putative (TIM10)	0.741547	1.8381	1.38211	2.7457	-0.423335	0.032962	0.0264	0.075575	-1.07926	-1.58825	-0.757687	-0.530031	0.525825	0.40643	0.13554	0.057982	YES	NO	YES
4	PF11_0265||PF3D7_1125400||mitochondrial inner membrane translocase subunit TIM44, putative	-0.17549	1.4636	1.67169	1.70903	-0.200992	-0.274003	0.448516	-0.380796	-0.997869	-1.37814	-0.88634	-0.289631	-0.03679	-0.043667	0.022384	0.091724	YES	NO	YES
4	MAL13P1.36||PF3D7_1307000||PNAS-3 related protein, putative	1.41781	1.78996	0.802299	1.31321	-0.17577	-0.114105	0.229035	0.025884	-1.47459	-1.11179	-0.182862	-1.01012	-0.379896	0.006764	0.007098	0.118601	YES	NO	NO
4	PF13_0071||PF3D7_1312700||probable protein, unknown function	1.35195	2.87617	1.29806	2.01667	-0.129763	-0.225601	0.237536	0.067462	-1.16941	-1.24896	-0.972097	-0.647469	-0.371816	0.008388	0.301232	0.158496	YES	NO	YES
4	PF11_0096||PF3D7_1108400||casein kinase 2, alpha subunit (CK2alpha)	1.03568	1.95908	0.793516	1.78057	-0.0496	0.01598	0.105552	-0.100425	-2.03374	-0.987008	-0.365268	-1.04078	0.462115	0.369795	-0.103748	0.44443	YES	NO	YES
4	PFC0282w||PF3D7_0306700||membrane magnesium transporter, putative	1.15599	1.78391	1.35613	2.0455	-0.438122	0.515613	0.326735	0.003113	-1.18459	-1.38253	-0.498206	-0.831929	0.906406	0.323972	-0.111264	0.0206	YES	NO	NO
4	PFA0620c||PF3D7_0113000||glutamic acid-rich protein (GARP)	0.186854	2.67075	2.15078	2.61307	-0.082511	-0.109979	0.322861	0.108759	-0.791093	-2.34748	-0.976768	-0.639397	-0.241647	0.528651	0.332666	-0.295698	YES	NO	NO
4	PF10_0013||PF3D7_1001000||Plasmodium exported protein (hyp12), unknown function (PfJ13)	-0.119447	2.52781	2.02525	2.52266	-0.160237	-0.205321	0.522924	-0.210281	-0.528378	-2.74578	-1.09272	-0.565569	-0.019091	-0.264341	0.183621	-0.26883	YES	NO	YES
4	PF14_0038||PF3D7_1404100||cytochrome c, putative	0.2104	1.56385	1.02656	1.57435	-0.462816	-0.073728	0.311019	-0.173873	-1.07476	-1.48581	-0.67621	-0.489745	0.132658	-0.029786	-0.246118	-0.074408	YES	NO	NO
4	PFB0885w||PF3D7_0219200||40S ribosomal protein S30, putative	1.4616	1.56256	0.304903	3.29061	-0.728258	-0.130709	0.256114	-0.411948	-2.31246	-1.56446	-0.000246	-1.34601	-0.201102	-1.01436	-0.327808	0.376962	YES	NO	YES
4	PFL1420w||PF3D7_1229400||macrophage migration inhibitory factor (MIF)	1.26768	1.67735	0.972887	2.04201	-0.84327	-0.009026	0.015732	-0.094616	-1.56697	-1.00604	-0.896524	-1.40034	0.532715	-0.2426	-0.267444	0.173982	YES	NO	YES
4	PF11_0331||PF3D7_1132200||TCP-1/cpn60 chaperonin family, putative	0.718926	1.35857	1.38878	2.27847	-0.493692	-0.074685	0.20834	-0.313449	-1.30225	-1.47608	-0.394747	-0.284077	0.04492	0.105224	-0.125275	0.112835	YES	NO	YES
4	PF10_0289||PF3D7_1029600||adenosine deaminase (ADA)	1.30342	1.314	1.08598	2.37731	-0.327714	0.446098	-0.063893	0.021032	-1.61729	-0.984059	-0.911297	-1.18284	0.672848	0.23509	0.032135	0.720475	YES	NO	YES
4	PF14_0448||PF3D7_1447000||40S ribosomal protein S2, putative	1.2123	1.10952	1.12495	3.40715	-0.67456	0.284461	0.057256	-0.264385	-1.84323	-1.3386	-0.203468	-0.736987	0.136177	-0.428615	-0.455625	0.604256	YES	NO	YES
4	PF14_0359||PF3D7_1437900||HSP40, subfamily A, putative	0.61673	1.45705	1.1323	2.25036	-0.364115	-0.112805	0.176198	-0.311095	-1.31802	-1.39805	-0.508693	-0.346449	-0.000598	-0.405912	-0.207232	0.451204	YES	NO	YES
4	PF11_0051||PF3D7_1104000||phenylalanyl-tRNA synthetase beta chain, putative	0.645081	1.6563	1.17872	1.70726	-0.381561	-0.006061	0.035778	-0.052449	-1.22649	-1.43099	-0.395326	-0.948391	0.656704	0.319857	-0.008993	-0.111917	YES	NO	YES
4	PFE0285c||PF3D7_0505800||small ubiquitin-related modifier, putative (SUMO)	1.56627	2.15968	0.166	2.85296	-0.320441	-0.013911	0.151061	-0.223162	-2.00821	-1.49302	0.148181	-1.31846	-0.266068	-0.508443	-0.447531	0.610464	YES	NO	YES
4	PFD0770c||PF3D7_0415900||60S ribosomal protein L15, putative	1.04076	1.33157	0.762905	3.23316	-0.560827	0.136801	0.40562	-0.592402	-3.19548	-1.84783	0.231954	-1.15448	-0.160344	-0.526563	-0.2408	0.523998	YES	NO	YES
4	PF07_0027||PF3D7_0708100||DNA-directed RNA polymerase 2 8.2 kDa polypeptide, putative	0.648693	0.782524	1.53851	1.27535	-0.195805	0.058757	0.10816	-0.107677	-1.88304	-1.53605	-0.594077	-0.33613	0.225282	0.338372	0.034106	0.2606	YES	NO	YES
4	PF13_0287||PF3D7_1354500||adenylosuccinate synthetase (adsS)	0.343835	1.25028	1.05277	1.66942	-0.238667	0.020689	-0.015108	-0.292243	-1.31549	-1.74856	-0.412055	-0.532494	0.316566	-0.134908	-0.048382	0.106269	YES	NO	NO
4	PF08_0004||PF3D7_0830400||conserved Plasmodium protein, unknown function	1.51173	1.32706	0.998166	2.37172	-0.373127	0.224094	-0.053985	-0.506578	-1.73295	-1.68458	-0.007948	-1.19426	0.458589	-0.116033	-0.219748	0.227415	YES	NO	YES
4	PF11_0250||PF3D7_1123900||splicing factor, putative	0.327859	1.48015	1.48471	1.45236	-0.550535	0.063134	0.323843	-0.107173	-2.04207	-1.63872	-0.695444	-0.312044	0.03606	-0.021337	0.00698	-0.047505	YES	NO	YES
4	PFF1025c||PF3D7_0621200||pyridoxine biosynthesis protein PDX1 (PDX1)	0.846963	1.06926	1.54011	3.37572	-0.381742	0.029855	0.476966	-0.050021	-1.49762	-2.09418	-0.562847	-0.508573	0.360121	-0.335964	0.001053	0.130939	YES	NO	YES
4	PF14_0261||PF3D7_1428300||proliferation-associated protein 2g4, putative	0.623497	1.12296	1.32858	1.85879	-0.188141	-0.031004	0.426632	-0.495272	-1.67376	-1.52154	-0.503522	-0.465479	0.297142	-0.117671	-0.125218	0.262404	YES	NO	YES
4	PFE0060w||PF3D7_0501200||parasite-infected erythrocyte surface protein (PIESP2)	-0.865928	1.26099	0.980002	1.62187	-0.268271	-0.145019	0.436488	-0.135843	-0.389625	-2.8402	-1.5617	-0.701141	0.233958	-0.358865	-0.120002	0.28144	YES	NO	YES
4	PF14_0378||PF3D7_1439900||triosephosphate isomerase (TIM)	0.861007	1.21953	0.363408	2.4462	-0.532459	-0.047106	0.073443	-0.075313	-1.7793	-1.20357	-0.306108	-1.03575	0.539121	-0.088314	-0.089672	0.301964	YES	NO	YES
4	PF14_0122||PF3D7_1412300||nuclear transport factor 2, putative	1.30774	0.965894	-0.300986	2.00557	-0.30504	0.106444	0.182524	-0.035668	-2.4137	-1.40599	-0.525354	-1.38266	0.246754	0.071392	-0.17936	0.41124	YES	NO	YES
4	PF14_0242||PF3D7_1426200||arginine methyltransferase 1 (PRMT1)	0.750692	1.80518	1.45436	1.74747	-0.265513	-0.060444	0.036101	-0.113514	-1.31796	-1.74914	-0.478012	-0.74771	0.003056	-0.121902	0.01523	0.141745	YES	NO	YES
4	PFF1335c||PF3D7_0627500||4-methyl-5(B-hydroxyethyl)-thiazol monophosphate biosynthesis enzyme	-0.411107	0.936828	1.69281	1.16836	-0.494969	0.053604	0.097174	-0.089657	-1.3967	-1.71481	-0.406217	-0.155532	0.323642	-0.042724	0.06634	0.44003	NO	NO	NO
4	PFI0086w||PF3D7_0901800||Plasmodium exported protein, unknown function	0.393896	2.16802	1.05049	1.07011	-0.355643	-0.25584	0.221653	0.434763	-1.13209	-1.97223	-0.999968	-1.39867	0.020751	-0.016262	0.199509	-0.006097	YES	NO	NO
4	PFE1600w||PF3D7_0532300||Plasmodium exported protein (PHISTb), unknown function	-0.826692	0.285881	1.87647	2.13338	-0.258111	0.017607	0.282448	-0.307015	-1.29883	-3.0868	-1.17438	-0.390398	0.515569	-0.205187	0.240631	0.293691	YES	NO	YES
4	PFC0870w||PF3D7_0319600||elongation factor 1 (EF-1), putative	0.34384	1.46527	0.934275	1.72008	-0.294404	0.383532	0.253738	-0.278561	-1.18213	-1.96011	-0.763828	-0.842604	-0.727434	-0.335821	-0.050339	0.240021	YES	NO	YES
4	PF13_0316||PF3D7_1358800||40S ribosomal protein S13, putative	1.04084	0.975323	0.019453	2.72805	-0.227769	0.278989	0.350171	-0.689943	-2.23223	-1.70294	0.046728	-1.1322	-0.35097	-0.871553	-0.375391	0.502491	YES	NO	NO
4	MAL8P1.206||PF3D7_0831400||Plasmodium exported protein, unknown function	0.033156	3.05905	1.15053	2.79155	-0.396517	-0.324182	0.468432	0.179737	0.006224	-3.40674	-1.91682	-0.448744	1.24567	-0.105561	0.019465	-0.289791	YES	NO	NO
4	MAL7P1.300||PF3D7_0705700||40S ribosomal protein S29, putative	1.0781	0.939844	0.55376	3.09584	-0.552516	0.1108	0.156806	-0.340224	-1.68978	-2.13968	-0.172802	-1.31201	0.056443	-0.647312	-0.317175	0.3666	YES	NO	YES
4	PFF0700c||PF3D7_0614500||60S ribosomal protein L19, putative	1.22317	1.15655	0.335931	3.08003	-0.45239	-0.044453	0.438527	-0.819868	-2.34556	-1.6908	-0.211553	-1.42159	-0.579422	-1.20733	-0.307247	0.680245	YES	NO	NO
4	PF11_0511||PF3D7_1149400||Plasmodium exported protein, unknown function	-0.373383	2.79045	1.33776	2.08028	-0.301639	-0.443924	0.149099	-0.450306	-0.265195	-2.97278	-1.36752	-1.46508	-0.137741	-0.281378	0.301463	0.302311	YES	NO	YES
4	MAL13P1.257||PF3D7_1351100||conserved Plasmodium protein, unknown function	0.817818	1.92173	1.38574	1.04906	-0.298447	0.019662	0.012736	0.040928	-2.14716	-1.53985	-0.730257	-0.840138	0.853949	0.359399	0.096225	0.204015	YES	NO	NO
4	PF14_0742||PF3D7_1477100||Plasmodium exported protein (hyp6), unknown function	-2.14602	1.60805	1.34215	2.03095	-0.421402	-0.60597	-0.383852	-0.145756	0.258184	-3.20695	-2.62299	-0.820893	0.907647	0.015069	0.076041	-0.034777	YES	NO	YES
4	PF10_0366||PF3D7_1037300||ADP/ATP transporter on adenylate translocase	0.998171	1.80412	1.52073	1.83736	-0.270695	0.275344	-0.065894	-0.408055	-2.05905	-1.61742	-0.278295	-0.651674	0.918154	0.217808	0.046507	0.254989	YES	NO	NO
4	PFI1405c||PF3D7_0928600||conserved Plasmodium protein, unknown function	-0.230107	2.12936	1.73976	2.06611	-0.162063	0.21421	0.177363	0.349572	-1.0899	-2.73003	-1.20832	-1.04346	0.718283	0.555384	0.43699	-0.024356	YES	NO	YES
4	PFC0975c||PF3D7_0322000||peptidyl-prolyl cis-trans isomerase (CYP19A)	1.19324	1.94671	0.770529	3.17869	-0.496515	-0.104416	0.540734	-0.470786	-2.40881	-1.96451	-0.276747	-1.33439	-0.140228	-0.869632	-0.362782	0.456572	YES	NO	YES
4	PFE0660c||PF3D7_0513300||purine nucleoside phosphorylase (PNP)	1.30187	2.05343	0.957809	3.36968	-0.640874	0.229453	-0.13556	-0.263218	-2.0787	-1.70778	-0.335484	-1.5642	0.531257	0.13438	-0.085045	0.512416	YES	NO	YES
4	PF08_0039||PF3D7_0821700||60S ribosomal protein L22, putative	1.36979	1.51614	0.401302	2.50757	-0.323091	0.091114	0.541035	-0.352985	-2.80071	-1.83745	-0.004561	-1.81442	-0.094261	-0.448131	-0.036239	0.499906	YES	NO	YES
4	PF07_0079||PF3D7_0719600||60S ribosomal protein L11a, putative	1.01592	1.10633	0.736854	3.006	-0.437683	-0.048387	0.399079	-0.572986	-2.96018	-2.21664	-0.217057	-1.47435	-0.636112	-0.684203	-0.446888	0.68502	YES	NO	NO
4	PF10_0016||PF3D7_1001200||acyl-CoA binding protein, isoform 2, ACBP2 (ACBP2)	1.62279	3.64918	0.718879	2.74397	-0.694043	-0.079949	0.136764	0.242098	-1.75774	-2.58991	-1.30248	-2.20709	1.0894	0.293333	-0.010622	0.141541	YES	NO	YES
4	PF10_0121||PF3D7_1012400||hypoxanthine-guanine phosphoribosyltransferase (HGPRT)	1.65107	0.65653	3.14028	0.885477	-1.01615	-0.116876	0.506479	-0.145435	-2.11469	-2.66084	-0.953549	-1.94484	0.247658	-0.156912	-0.20475	0.180154	YES	NO	NO
5	PFD0195c||PF3D7_0404000||conserved Plasmodium protein, unknown function	2.10328	1.18712	1.11695	0.084372	-0.01132	0.263891	0.176958	-0.189134	0.205471	1.4957	2.08398	0.187554	-0.045353	-0.010384	-0.438427	0.07216	YES	NO	NO
5	PFC0830w||PF3D7_0318700||trophozoite stage antigen	2.13875	0.655501	1.84449	-0.889932	-0.042147	0.047911	-0.010225	-0.890121	-0.335583	1.82371	1.98011	1.2042	-0.93782	0.19649	-0.154693	0.371083	YES	NO	NO
5	PFI0945w||PF3D7_0919300||thioredoxin, putative	-0.517133	0.505858	0.363906	-0.966688	0.173374	-0.16829	0.292042	-0.629809	2.34454	2.48844	1.39227	2.04679	0.183081	0.071769	-0.131058	0.049687	YES	NO	NO
5	PF10_0262||PF3D7_1026600||conserved Plasmodium protein, unknown function	-1.35527	0.455995	1.47933	-1.17402	0.604797	0.075081	0.178167	-1.23037	1.47317	3.2928	1.70184	1.97394	-0.17844	-0.165642	0.300164	0.329431	YES	NO	NO
5	MAL13P1.260||PF3D7_1351700||alveolin, putative (ALV6)	-0.290524	-0.738154	-0.501809	-1.17262	0.471082	-0.092105	0.475215	-0.74688	1.68498	2.80302	2.41107	1.5811	-0.079614	-0.014015	0.16488	0.727794	YES	NO	NO
5	PFF0675c||PF3D7_0613900||myosin E, putative (myoE)	-0.126702	0.710176	-0.24324	-0.641713	0.614674	-0.324746	-0.011858	-0.840118	1.65051	2.8253	2.34	0.864607	-0.290437	-0.095442	0.222755	0.489884	YES	NO	YES
5	PF08_0008||PF3D7_0828800||GPI-anchored micronemal antigen (GAMA)	0.269309	-0.578829	-1.32182	-0.269309	0.461728	-0.211535	0.378427	-0.845661	1.28948	3.15011	2.4463	1.55217	0.055863	0.523057	0.168552	-0.13679	NO	NO	NO
5	PF13_0069a||PF3D7_1312500||conserved Plasmodium protein, unknown function	-0.842077	0.223369	0.657531	-1.08415	0.030021	0.422436	0.255153	-0.344398	1.11416	3.26481	1.31282	1.96828	1.03949	0.660719	0.114144	0.14663	YES	NO	NO
5	PF08_0035||PF3D7_0822900||conserved Plasmodium protein, unknown function	-0.513504	1.23658	0.015186	-1.10897	0.87727	-0.167071	0.252506	-0.712012	1.91526	2.36134	2.43889	0.844625	0.385592	-0.05455	0.363952	0.509778	YES	NO	NO
5	PFL2460w||PF3D7_1251200||coronin	-0.176657	1.18962	0.000631	-1.26922	0.234589	-0.421098	0.362043	-1.18338	1.4673	2.68906	2.18494	1.42662	0.38658	-0.134656	0.140831	0.349902	YES	NO	NO
5	PFF0870w||PF3D7_0618000||conserved Plasmodium membrane protein, unknown function	-0.61532	0.679122	0.198297	-0.877332	0.764592	-0.29921	0.503242	-0.144878	2.46064	1.59475	2.58451	-0.697252	0.359463	-0.102226	0.598224	1.02778	YES	YES	YES
5	PF13_0161||PF3D7_1327300||conserved Plasmodium protein, unknown function	-0.398058	-0.757744	0.325953	-1.28983	0.648021	-0.269333	0.306962	-1.28707	1.2144	2.7274	1.60945	1.81765	-0.266701	-0.368027	0.147595	0.202244	YES	NO	NO
5	PF14_0527||PF3D7_1455300||conserved Plasmodium protein, unknown function	-0.9366	-0.131322	0.455735	-1.55694	0.61269	-0.314755	0.176649	-0.807208	1.69031	2.24149	2.21107	1.88941	0.371832	0.127941	0.111887	0.396406	YES	NO	NO
5	PFL1565c||PF3D7_1232500||CG2-related protein, putative	-0.266722	1.00332	-0.136793	-0.885821	0.48399	0.033482	-0.116144	-0.55285	1.22944	2.62933	1.43026	0.294348	0.099076	0.067535	-0.026436	0.594483	YES	NO	NO
5	PF10_0343||PF3D7_1035200||S-antigen	-0.446545	0.073966	-0.766715	0.782195	-0.052683	0.503498	-0.588299	-0.712065	1.05834	2.77034	3.39432	-0.119539	0.456195	-0.197018	0.165674	1.03269	YES	NO	NO
5	PFL2100w||PF3D7_1243700||ubiquitin conjugating enzyme E2, putative	-1.24678	0.763138	0.827986	-1.93305	0.45363	-0.169521	0.227698	-0.727427	1.3818	2.4087	1.08927	1.06874	-0.711505	0.215476	0.145813	0.248714	YES	YES	YES
5	PFL0795c||PF3D7_1216500||male development gene 1 (MDV1)	0.115992	0.376833	0.255435	0.268271	-0.354932	0.252711	0.197606	-0.578867	0.70611	4.22174	2.76576	1.02347	-0.534843	-0.502942	-0.340234	0.028112	YES	NO	NO
5	PFB0665w||PF3D7_0214600||serine/threonine protein kinase, putative	0.272413	1.5219	1.30816	-1.66226	0.322126	-0.205414	0.31728	-0.941845	0.549587	3.2148	2.51513	1.30069	0.187794	0.205572	0.121671	0.086182	YES	NO	NO
5	PFC1045c||PF3D7_0323400||Rh5 interacting protein (RIPR)	0.003201	1.84945	0.291572	-1.06663	0.245664	-0.258685	0.497365	-0.674357	1.08702	2.66084	2.26852	1.206	0.925571	0.444695	0.359721	0.238179	YES	NO	NO
5	PFD0100c||PF3D7_0402200||surface-associated interspersed protein 4.1 (SURFIN 4.1), pseudogene (SURF4.1)	0.050715	0.274109	-0.239227	-0.481433	0.461332	-0.126404	0.068278	-1.01196	0.95506	2.78663	1.75329	1.86091	-0.375398	-0.230256	0.102207	0.006559	YES	NO	NO
5	PFI1475w||PF3D7_0930300||merozoite surface protein 1 (MSP1)	-0.149171	1.59995	-0.550663	-1.03804	0.536333	-0.375903	-0.14473	-0.58007	0.866313	2.82215	2.51919	-0.35725	0.495528	-0.013294	-0.529809	0.807254	YES	NO	NO
5	PF11_0344||PF3D7_1133400||apical membrane antigen 1 (AMA1)	-0.528346	2.01889	0.515448	-1.71123	0.025802	-0.305193	0.092676	-0.900708	1.15885	2.52673	2.55117	1.55324	0.25378	0.003997	-0.144154	0.308566	YES	NO	NO
5	PFE0370c||PF3D7_0507500||subtilisin-like protease 1 (SUB1)	-0.061023	0.366289	-0.312143	-1.0538	0.368841	-0.256645	0.080511	-0.800671	1.55335	2.10965	1.91193	1.33837	0.292233	0.140574	0.146341	0.321354	YES	NO	NO
5	PFL1505c||PF3D7_1231200||conserved Plasmodium protein, unknown function	0.145653	-0.04466	-0.182321	-1.07966	0.466238	-0.406334	0.392804	-0.638256	1.51875	2.13366	0.698303	1.56752	0.250646	-0.014769	0.248236	0.101653	YES	NO	NO
5	PFF0085w||PF3D7_0601700||Plasmodium exported protein (PHISTa), unknown function, pseudogene	-0.155963	-0.244842	-0.399345	-0.938934	0.384363	0.024074	0.150411	-0.613738	1.32313	2.32837	1.04864	2.08345	0.870097	0.067574	-0.302223	-0.273329	YES	NO	NO
5	MAL8P1.70||PF3D7_0818100||zinc finger protein, putative	-1.19329	1.46552	1.19329	-2.17572	0.267881	-0.186091	0.199945	-0.715595	0.726026	2.9162	2.28627	1.38801	-0.153307	0.013301	0.181424	0.144053	YES	NO	NO
5	PFL2520w||PF3D7_1252400||reticulocyte binding protein homologue 3, pseudogene (RH3)	-0.253953	0.972097	0.168864	-1.11426	0.225655	-0.093607	0.259566	-0.672815	0.761191	2.82999	1.88821	1.62722	0.182875	0.297601	0.118216	0.210679	YES	NO	NO
5	PF11_0442||PF3D7_1143100||transcription factor with AP2 domain(s) (AP2-O)	0.074714	-0.428735	-0.87801	-0.131411	0.84229	-0.064811	0.435736	-0.649105	1.23671	2.34862	1.51678	1.33229	-0.304567	-0.203461	-0.06197	0.65692	YES	NO	YES
5	PFI0540w||PF3D7_0911100||conserved Plasmodium protein, unknown function	-0.765532	1.53077	0.484351	-1.46948	0.098409	-0.154027	0.073474	-0.649698	0.581537	2.95712	2.73515	1.33354	0.490514	-0.617005	0.052195	-0.003568	YES	NO	NO
5	MAL7P1.141||PF3D7_0725400||conserved Plasmodium protein, unknown function	-0.457999	1.71107	0.475845	-1.59023	0.315952	-0.503126	0.28327	-0.839798	0.336619	3.1941	3.18484	1.16781	-0.103082	-0.107191	-0.026817	0.110402	YES	NO	NO
5	PFI1675w||PF3D7_0934600||conserved Plasmodium protein, unknown function	-0.858092	0.75473	0.816675	-1.02651	0.358417	-0.058704	0.26651	-0.545943	1.43259	2.04342	1.5455	1.15595	0.063866	0.657416	0.1705	-0.161025	YES	NO	NO
5	PFD0110w||PF3D7_0402300||reticulocyte binding protein homologue 1,normocyte binding protein 1 (RH1)	-0.647257	0.990443	0.531169	-1.41019	0.829619	-0.406491	0.075134	-0.854983	0.522345	2.94398	1.72831	1.39763	0.057214	-0.080742	0.279593	0.351023	YES	NO	NO
5	PF13_0058||PF3D7_1310700||conserved Plasmodium protein, unknown function	1.85943	-0.696222	0.431013	-0.328385	0.261294	0.013184	0.488828	-1.05987	0.179999	3.25969	2.77596	0.994567	0.003627	-0.266095	0.168108	0.672829	YES	NO	NO
5	PF10_0357||PF3D7_1036500||probable protein, unknown function	0.080027	0.443448	-0.204717	-1.12839	0.77285	-0.210124	0.502537	-1.14283	0.715806	2.69248	1.41436	2.04333	-0.524191	-0.341402	0.146115	0.178871	YES	NO	NO
5	PFE0770w||PF3D7_0515400||conserved Plasmodium protein, unknown function	-1.48438	-0.565742	0.540057	-0.618406	1.06861	-0.162289	0.366168	-0.604937	1.49856	1.8659	1.58124	-0.214693	0.609381	0.091409	0.298814	0.566953	YES	NO	NO
5	MAL13P1.60||PF3D7_1301600||erythrocyte binding antigen-140 (EBA140)	-0.734241	0.106966	-0.56726	-0.711084	0.01906	-0.273361	0.20544	-1.03118	0.334046	2.99426	2.27712	2.18297	0.028771	0.063867	-0.014917	0.334096	YES	NO	NO
5	PF13_0039||PF3D7_1307500||conserved Plasmodium protein, unknown function	0.592199	0.064334	-1.61831	-0.966004	0.006527	-0.029125	0.476271	-0.377749	1.8384	1.48825	1.3722	0.406625	1.00632	0.403	-0.071535	0.300881	YES	NO	NO
5	PF10_0344||PF3D7_1035300||glutamate-rich protein (GLURP)	-0.308376	1.05279	-0.405993	-2.19475	0.443178	-0.121973	0.359188	-0.53821	1.23804	2.08281	2.22019	0.198368	-0.43287	-0.20809	0.451651	0.768806	YES	NO	NO
5	PFB0570w||PF3D7_0212600||secreted protein altered thrombospondin repeat protein (SPATR)	-0.019118	0.917618	0.096152	-0.780574	0.333673	0.085602	0.297574	-0.610981	1.51442	1.77265	0.797674	1.66568	0.192219	0.065078	-0.178488	0.388902	YES	NO	NO
5	PF10_0346||PF3D7_1035500||merozoite surface protein 6 (MSP6)	0.93184	1.43445	-0.822851	-1.14321	0.460199	-0.462913	0.352436	-1.03753	1.10227	2.18261	1.48019	0.977933	0.785722	0.305478	-0.456342	0.188349	YES	NO	NO
5	PF11_0277||PF3D7_1126700||conserved Plasmodium protein, unknown function	-0.668794	0.320251	0.272841	-1.97713	0.494356	-0.15331	0.114696	-0.815938	1.79928	1.45802	2.36859	-0.099246	-0.276137	0.584773	0.268196	0.614854	YES	NO	NO
5	PFB0475c||PF3D7_0210600||conserved Plasmodium protein, unknown function	-0.209728	1.05924	-0.100091	-1.29011	0.165895	-0.329567	0.161144	-0.805466	0.962161	2.28067	1.58902	0.841776	0.261028	0.027375	0.255706	0.351706	YES	NO	NO
5	PFD1150c||PF3D7_0424200||reticulocyte binding protein homologue 4 (RH4)	-0.205136	0.583362	0.268489	-1.11526	0.439944	-0.33616	0.208424	-0.703092	0.900885	2.33484	1.45068	1.61434	-0.169082	-0.065395	0.210584	0.115212	YES	NO	NO
5	PFI0940c||PF3D7_0919200||PPPDE peptidase, putative	2.24224	-0.112524	0.859929	-1.83702	0.443062	-0.405085	0.47106	-0.826307	0.375638	2.84423	2.01838	0.223164	0.237251	0.016764	0.231815	0.410802	YES	NO	NO
5	PF07_0104||PF3D7_0724900||kinesin-like protein, putative	-0.60205	-0.461769	0.425856	-0.999349	0.618997	-0.107409	0.421655	-0.795124	1.11583	2.09622	1.14336	1.62552	-0.581985	-0.129297	0.01572	-0.041653	YES	NO	NO
5	PFB0425c||PF3D7_0209500||conserved Plasmodium protein, unknown function	1.1635	-1.15723	0.207169	-0.072728	0.185605	-0.055963	0.341832	-0.552647	0.939801	2.23975	1.01422	1.54253	0.26671	-0.269931	0.200103	0.061557	YES	NO	NO
5	PFD0385w||PF3D7_0407800||conserved Plasmodium protein, unknown function	-1.66825	0.775213	1.36334	-1.83149	0.695695	-0.13453	-0.180203	-0.283685	1.4864	1.68432	1.74368	-0.642358	0.26035	-0.051794	-0.046752	0.917825	YES	NO	NO
5	PF10_0352||PF3D7_1036000||merozoite surface protein (MSP11)	-1.04723	0.906164	0.848569	-1.99088	0.543888	-0.124345	0.260107	-0.708902	1.22987	1.92825	1.19712	1.28401	-0.02778	-0.137476	-0.082444	0.406267	YES	NO	YES
5	PF14_0224||PF3D7_1423300||serine/threonine protein phosphatase (PP7)	-0.385853	-0.395823	-1.09339	-0.741521	0.574574	-0.43498	0.330008	-0.524722	1.55501	1.60289	1.77857	-0.090471	0.898547	0.119464	0.012112	0.658652	YES	NO	YES
5	PF13_0233||PF3D7_1342600||myosin A (MyoA)	0.348205	1.20396	-0.726561	-0.667231	0.099021	-0.24976	0.051548	-1.18988	-0.009614	3.14264	2.46179	1.37048	-0.01387	0.072707	0.079364	0.577464	YES	NO	NO
5	PFC0185w||PF3D7_0304100||membrane skeletal protein IMC1-related (ALV2)	-0.195586	-0.034871	-1.39015	-1.27731	0.519158	0.095348	0.387904	-0.015235	1.26593	1.85104	2.21408	0.160924	-0.727004	-0.147084	0.229183	0.887988	YES	NO	NO
5	PF11_0268||PF3D7_1125800||kelch protein, putative	-0.667351	1.04469	0.552623	-1.48202	0.119698	-0.173389	0.186896	-0.528086	0.398424	2.65971	1.78719	1.35464	0.348673	0.288038	0.042043	0.266538	YES	NO	NO
5	PFD0230c||PF3D7_0404700||dipeptidyl peptidase 3 (DPAP3)	-0.162764	1.79382	-0.286789	-0.984495	0.599567	-0.260693	-0.037127	-0.326682	1.49805	1.54974	2.13994	-1.03308	-0.374897	0.509269	0.251746	0.992976	YES	NO	YES
5	PF08_0108||PF3D7_0808200||plasmepsin X	0.069414	0.238345	-0.101627	-0.603865	0.373674	5.1e-05	0.227648	-0.402962	0.544918	2.49709	2.11187	1.83256	0.828324	0.106052	0.030217	0.280504	YES	NO	NO
5	PFD0900w||PF3D7_0418600||regulator of chromosome condensation, putative	-0.010709	1.1728	0.048391	-0.995677	0.248677	-0.22024	-0.011317	-0.463398	0.766708	2.24231	1.55842	1.03578	0.39549	0.033327	0.098805	0.445045	YES	NO	NO
5	PFD0765w||PF3D7_0415800||RING zinc finger protein, putative	0.211575	0.362676	-0.835031	-0.273358	0.292134	-0.373861	0.415764	-0.560833	0.825951	2.15137	1.02	1.20194	1.30612	-0.130085	0.1007	0.16083	YES	NO	NO
5	PFA0125c||PF3D7_0102500||erythrocyte binding antigen-181 (EBA181)	-0.592794	0.215097	0.592794	-0.793409	0.498665	-0.404749	-0.123358	-0.744758	0.289853	2.68587	1.79117	1.85184	0.042643	0.031779	-0.443238	0.250701	YES	NO	NO
5	PFD0720w||PF3D7_0414900||armadillo-domain containing rhoptry protein (ARO)	-0.281242	0.382159	-1.3209	-0.428344	0.066719	-0.306833	0.156932	-0.612126	0.796616	2.11372	1.96166	1.19767	0.783481	0.288931	-0.002239	0.504307	YES	NO	NO
5	PF08_0118||PF3D7_0805300||conserved Plasmodium protein, unknown function	-0.787324	0.567981	0.816483	-1.55749	0.525554	-0.295463	0.383682	-0.723506	0.581362	2.31532	1.52387	1.47506	0.425261	-0.093488	0.277526	-0.038405	YES	NO	YES
5	PFB0315w||PF3D7_0207100||conserved Plasmodium protein, unknown function	-0.21418	1.58683	0.009813	-1.49932	0.450724	-0.343244	-0.037562	-0.600593	1.05861	2.12634	0.621625	0.662672	-0.158996	-0.136961	-0.217642	0.409285	YES	NO	NO
5	PFL0245w||PF3D7_1204900||probable protein, unknown function	0.095769	0.216999	-0.187816	-0.882751	0.082889	-0.090565	0.010497	-0.757461	1.10367	1.7319	1.26048	1.46967	0.444214	0.239257	-0.034994	0.183074	YES	NO	YES
5	PFL2225w||PF3D7_1246400||myosin light chain 1,myosin A tail domain interacting protein (MTIP)	-0.04159	1.11828	-0.512259	-1.02752	0.252801	-0.08757	0.199103	-1.11382	0.83358	1.99583	1.52908	1.03883	-0.025179	-0.190829	-0.018567	0.402529	YES	NO	NO
5	PFD0395c||PF3D7_0408000||conserved Plasmodium protein, unknown function	0.71447	-2.49722	-0.799976	-2.43304	0.303882	0.187553	0.674442	-0.372734	0.647596	2.16506	1.7573	1.70624	0.08898	0.248637	0.096823	0.627774	NO	NO	NO
5	PFB0305c-a||PF3D7_0206900||merozoite surface protein 5 (MSP5)	0.081017	1.4257	0.502652	-1.41677	0.003581	-0.053501	0.503812	-0.884423	0.931497	1.84278	0.540396	1.13195	-0.555197	0.005269	-0.149833	0.059326	NO	NO	NO
5	PF14_0108-a||PF3D7_1411000||conserved Plasmodium protein, unknown function	-0.812919	1.44505	1.29707	-0.372608	0.237555	-0.095104	0.125344	-0.406936	-0.009956	2.77975	1.6444	1.6655	0.747946	0.700406	0.472689	0.162464	YES	NO	NO
5	MAL7P1.208||PF3D7_0707300||rhoptry-associated membrane antigen (RAMA)	-2.37378	1.15115	0.47273	-0.497137	0.643954	0.119737	0.092166	-0.540364	0.807028	1.95355	3.0608	-0.190934	0.885396	0.969463	0.442143	1.06995	YES	NO	NO
5	PF14_0652||PF3D7_1468400||zinc finger protein, putative (D13)	-1.07881	1.23427	0.655027	-1.95538	1.02072	-0.472936	0.649571	-0.928646	0.77071	1.98395	1.7366	0.107222	0.303791	-0.08389	0.352252	0.59286	YES	NO	NO
5	PF08_0058||PF3D7_0817600||conserved Plasmodium protein, unknown function	-0.382881	0.104944	-0.618038	-0.964052	0.896685	-0.042749	0.274314	-0.22774	1.62522	1.12641	2.39927	-0.666283	-1.04366	0.450887	0.416521	1.13124	YES	NO	NO
5	PF11_0267||PF3D7_1125700||kelch protein, putative	-0.983413	1.33739	1.6	-1.17815	-0.00122	-0.093582	0.175238	-0.368334	0.843009	1.90238	1.69956	1.49115	-0.456837	0.076892	0.030325	0.251673	YES	NO	NO
5	PFL1515c||PF3D7_1231400||amino acid transporter, putative	-0.989845	0.522987	0.541433	-1.21004	0.375491	-0.067674	0.202161	-0.574814	0.660828	2.082	0.529909	1.11669	0.207671	-0.177465	0.232991	0.055608	YES	NO	NO
5	PF10_0351||PF3D7_1035900||probable protein, unknown function (M566)	-1.16285	-0.296078	-0.667511	-1.13448	0.242658	-0.069474	0.436519	-0.818608	0.80673	1.91414	1.9308	0.680039	0.319823	-0.00631	0.271839	0.826469	YES	NO	NO
5	PFB0670c||PF3D7_0214700||conserved Plasmodium protein, unknown function	-0.498724	0.572185	0.498724	-1.67281	0.332201	-0.275784	0.40003	-0.534784	0.935962	1.77004	1.48582	0.970767	-0.144986	-0.134045	0.039882	0.430876	YES	NO	NO
5	PFL1510c||PF3D7_1231300||conserved Plasmodium protein, unknown function	1.01085	-0.830311	0.851033	-0.645287	0.293315	-0.366809	0.102367	-0.012861	1.65874	1.0358	0.547363	0.639879	0.289522	-0.304869	-0.13743	-0.353969	YES	NO	NO
5	PF10_0156||PF3D7_1016000||conserved Plasmodium protein, unknown function	-0.795917	1.08264	0.634996	-1.26928	0.41947	-0.105503	0.235434	-0.627402	0.880669	1.81102	0.961802	0.664198	-0.605491	-0.199929	0.095727	0.301671	YES	NO	NO
5	MAL8P1.150||PF3D7_0802600||adenylyl cyclase beta (ACbeta)	-0.111885	0.892227	-0.227805	-1.2971	0.60073	0.028563	-0.340643	-0.065221	1.21743	1.46658	2.08408	-0.483931	0.496995	0.054528	0.03092	0.474364	YES	NO	YES
5	PF11_0381||PF3D7_1136900||subtilisin-like protease 2 (SUB2)	0.145002	-1.04572	-0.624768	-0.828492	0.025311	0.658024	0.226559	-0.435155	1.2314	1.39916	1.59757	1.72281	1.00454	1.50215	0.003276	0.037979	YES	NO	YES
5	PFB0275w||PF3D7_0206200||metabolite/drug transporter, putative	0.415122	0.236088	0.224125	-0.549103	0.059247	0.136272	0.070164	-0.192974	0.557735	2.06865	1.45052	1.64668	0.732409	0.589485	0.091558	-0.134452	YES	NO	NO
5	PFD0390c||PF3D7_0407900||AAA family ATPase, putative	-0.600294	1.45304	0.731469	-1.32168	0.45131	-0.119797	0.098174	-0.803081	0.212746	2.4098	0.964521	1.37355	-0.103296	-0.053234	0.108886	0.19968	YES	NO	NO
5	MAL7P1.119||PF3D7_0722200||rhoptry-associated leucine zipper-like protein 1 (RALP1)	-0.680441	1.11862	-0.736212	-1.89551	0.754384	-0.204408	0.197698	-0.598348	0.574362	2.0085	2.29759	-0.977265	-0.216041	-0.298844	0.36188	0.833964	YES	NO	NO
5	PFD1145c||PF3D7_0424100||reticulocyte binding protein homologue 5 (RH5)	0.084056	1.56472	1.30499	-1.2439	0.234427	-0.444833	0.451803	-1.03966	0.459828	2.06587	2.24693	0.985146	-0.258518	0.040039	0.073082	0.205823	YES	NO	NO
5	MAL13P1.114||PF3D7_1321100||conserved Plasmodium protein, unknown function	-0.820109	1.13351	0.349663	-0.496705	0.653812	-0.274215	-0.269661	-0.216404	0.968407	1.54983	2.39785	-0.892074	-0.696405	-0.196271	0.089034	0.834697	YES	NO	YES
5	PFI1015w||PF3D7_0920700||conserved Plasmodium protein, unknown function	-0.367585	0.399895	-0.367326	-0.883966	0.322411	-0.285591	0.245505	-0.442837	0.718992	1.79741	0.933794	-0.04811	-0.214127	0.140227	-0.025778	0.462344	YES	NO	YES
5	PFL2215w||PF3D7_1246200||actin I (ACT1)	-0.326486	0.412346	-1.11237	-1.50296	0.273955	-0.063641	0.058114	-0.732731	0.497952	2.34069	1.61732	0.213254	0.138242	-0.167559	-0.369568	0.799159	YES	NO	YES
5	PFI0675w||PF3D7_0913800||conserved Plasmodium protein, unknown function	0.025354	1.27902	2.01208	0.015653	0.081868	-0.168326	0.321807	-0.444028	0.233802	2.25015	2.15108	1.14573	0.157447	0.398312	-0.016708	0.195187	YES	NO	NO
5	PF10_0348||PF3D7_1035700||duffy binding-like merozoite surface protein (DBLMSP)	-1.42697	0.480132	0.500501	-0.787758	0.517223	-0.197221	-0.135032	-0.468191	0.609988	1.86745	1.90283	0.108069	-0.021089	-0.089164	-0.220334	0.602619	YES	NO	NO
5	PFE0075c||PF3D7_0501500||rhoptry-associated protein 3 (RAP3)	-0.536404	1.32954	0.074704	-1.44664	0.162884	0.290374	-0.088289	0.070833	0.550409	1.90157	2.85048	-1.19748	0.802584	0.528573	0.250889	0.92164	NO	NO	NO
5	PFI0175w-b||PF3D7_0903600||conserved Plasmodium protein, unknown function	-0.75142	0.164274	1.09416	-1.9933	0.743561	-0.410908	0.397941	-0.854568	1.19456	1.25365	0.718164	1.31134	0.447755	0.016043	0.047816	0.266889	YES	NO	NO
5	PF10_0295||PF3D7_1030200||conserved Plasmodium protein, unknown function	0.029099	1.37032	-0.090539	-1.19786	0.264081	0.105233	0.342427	-0.278845	1.20261	1.24559	1.84704	0.626396	-0.443015	0.282528	0.279813	0.526102	YES	NO	NO
5	PFE1285w||PF3D7_0525800||membrane skeletal protein IMC1-related	0.914198	1.51108	-0.725827	-1.01075	0.205711	-0.244512	0.562076	-0.934098	0.097636	2.34933	2.55432	1.20991	0.158466	-0.113567	-0.024053	0.64152	NO	NO	NO
5	PF10_0345||PF3D7_1035400||merozoite surface protein 3 (MSP3)	2.08359	1.09993	0.430444	0.136713	0.349965	-0.1289	-0.060255	-1.06322	-0.256032	2.70124	2.23835	0.724456	-0.282002	-0.472227	-0.335574	0.463943	YES	NO	NO
5	PFI1555w||PF3D7_0932000||conserved Plasmodium protein, unknown function	0.977266	-1.17508	-0.321528	-2.23942	0.11435	0.365234	0.338363	-0.102601	0.613067	1.82449	1.35235	0.011521	0.847522	0.136996	0.143011	0.423201	YES	NO	NO
5	PFI0690c||PF3D7_0914100||conserved Plasmodium protein, unknown function	0.657742	-1.31212	-0.509818	-2.31646	0.738458	-0.256117	0.107237	-0.62504	0.750331	1.68611	1.33859	0.346851	-0.828322	-0.272081	0.112271	0.348619	YES	NO	NO
5	PFC0355c||PF3D7_0308300||conserved Plasmodium protein, unknown function	-0.513077	0.743563	0.263415	-1.15197	0.583975	-0.193855	0.169661	-0.483138	1.31705	1.06843	0.728557	0.727098	-0.020768	0.1488	0.13994	0.455055	YES	NO	YES
5	PFI1685w||PF3D7_0934800||cAMP-dependent protein kinase catalytic subunit (PKAc)	2.10386	-0.502733	-1.2402	-0.884886	-0.101099	0.071894	-0.154657	-0.302778	0.816391	1.56472	2.54879	-0.985461	0.668962	0.435413	-0.058366	0.918515	YES	NO	NO
5	PFL0870w||PF3D7_1218000||thrombospondin-related apical membrane protein (TRAMP)	-0.166198	2.48651	0.18774	-1.61695	0.093511	-0.073448	0.4678	-0.459939	-0.013462	2.38417	1.84434	1.26787	-0.021923	0.062762	0.044249	0.17237	YES	NO	NO
5	PFD1130w||PF3D7_0423800||cysteine-rich protective antigen (CyRPA)	-1.06483	0.659947	0.833519	-1.81413	0.214593	-0.110326	0.033078	-0.192777	0.557192	1.80635	1.4298	0.803274	0.433271	0.217728	-0.086916	0.377443	YES	NO	NO
5	PF14_0243b||PF3D7_1426400||MORN repeat protein, putative	0.794326	0.192937	-0.78829	0.383127	0.187506	0.266514	-0.00364	0.197199	1.17252	1.19023	1.0699	0.255039	1.19685	-0.012876	-0.113772	-0.541945	YES	NO	NO
5	PFD1155w||PF3D7_0424300||erythrocyte binding antigen-165, pseudogene (EBA165)	-0.425436	0.314204	-0.066105	-0.456252	0.195797	0.080604	0.211061	-0.628994	0.255174	2.10442	1.54131	1.99432	0.295099	0.493613	0.077981	0.33045	YES	NO	NO
5	PF10_0138||PF3D7_1014100||conserved Plasmodium protein, unknown function	-0.28932	1.27918	0.12606	-0.71263	0.319482	-0.34738	0.252457	-0.482837	-0.037562	2.38594	2.36747	0.129104	0.388902	0.256324	0.308693	0.554142	YES	NO	NO
5	PFB0680w||PF3D7_0214900||rhoptry neck protein 6 (RON6)	-0.549732	1.11033	0.13798	-0.604586	1.1355	-0.186541	-0.306286	-0.249972	0.510682	1.83319	2.3991	-0.305688	-0.643432	0.04348	-0.003418	0.756388	YES	NO	NO
5	PF14_0343||PF3D7_1436200||conserved Plasmodium protein, unknown function	-0.943946	0.647598	0.522721	-1.23325	0.593976	-0.317262	-0.179764	-0.205833	1.28143	1.05807	1.85644	-1.16395	0.082402	-0.025744	0.176921	0.944949	YES	NO	NO
5	PF14_0337||PF3D7_1435600||conserved Plasmodium protein, unknown function	-0.484668	0.459598	0.028312	-1.05901	0.964023	-0.157437	0.164314	-0.272948	1.00185	1.31676	1.41934	-1.20722	-0.105483	-0.25887	0.317968	0.711705	YES	NO	YES
5	PFI0265c||PF3D7_0905400||high molecular weight rhoptry protein 3 (RhopH3)	0.07774	1.09121	-1.60601	-0.993809	0.10142	-0.252018	-0.092085	-0.439728	0.205876	2.1045	3.08753	-1.52775	0.276854	-0.26997	-0.398989	1.16725	YES	NO	NO
5	PF13_0090||PF3D7_1316200||ADP-ribosylation factor, putative	-0.525969	0.145211	-0.100133	-1.50353	0.062421	-0.071569	0.030417	-0.221818	0.452676	1.84065	0.669267	0.409136	0.447601	0.493104	0.136384	0.169299	YES	NO	NO
5	PF11_0407||PF3D7_1139700||adrenodoxin reductase, putative	-0.783552	0.100868	1.72615	-0.773664	0.011274	0.247725	-0.038274	-0.547396	0.298831	2.20649	0.149833	1.34805	0.600186	0.461127	0.778512	0.032734	NO	NO	NO
5	MAL13P1.306-a||PF3D7_1361500||conserved Plasmodium protein, unknown function	0.904876	1.44427	-0.751359	-1.36911	0.245508	-0.029327	0.063169	-0.081542	1.01934	1.22833	1.86345	-0.619991	-0.453307	-0.042961	0.025636	0.729273	YES	NO	NO
5	PF10_0146||PF3D7_1014900||conserved Plasmodium protein, unknown function	-0.410472	1.07213	-0.092717	-1.09723	1.11614	-0.376084	-0.295196	-0.702972	0.79553	1.43074	1.88476	-0.65672	0.347771	0.093858	0.108738	0.763604	YES	NO	NO
5	PF10_0094||PF3D7_1009700||tubulin-tyrosine ligase, putative	-0.299836	1.44818	0.299836	-1.43137	0.238549	-0.11621	0.054779	-0.241208	0.782721	1.43438	2.33304	-1.27169	-0.221869	-0.015208	0.071379	0.887477	YES	NO	NO
5	PF11_0094||PF3D7_1108100||conserved Plasmodium protein, unknown function	-1.58159	0.001142	1.37989	-1.80167	0.809128	0.027043	0.44233	-0.254236	1.51844	0.691463	1.39798	-0.583691	0.139064	-0.151123	-0.04827	0.592888	YES	NO	NO
5	MAL13P1.156||PF3D7_1329700||conserved Plasmodium protein, unknown function	-0.051078	-1.71026	0.068564	-2.02128	0.271162	0.203407	0.213653	0.032959	0.33758	1.87175	1.20982	0.779489	0.990498	0.329992	0.056696	0.252195	YES	NO	NO
5	MAL13P1.102||PF3D7_1318700||conserved Plasmodium protein, unknown function	-0.111443	0.168294	0.111443	-1.05975	0.9789	-0.109226	0.686926	-0.189857	1.07753	1.12355	0.937261	0.060176	-0.206047	0.039626	0.268062	0.487779	YES	NO	NO
5	PF14_0325||PF3D7_1434400||conserved Plasmodium membrane protein, unknown function	-0.513898	2.15406	0.024276	-1.70148	0.514675	-0.051948	0.694493	-0.43447	0.472855	1.72552	1.92535	-0.699551	-0.278303	-0.184927	0.432702	0.883428	YES	NO	NO
5	PFB0300c||PF3D7_0206800||merozoite surface protein 2 (MSP2)	0.046827	1.43355	-0.968232	-1.37585	0.056046	0.036281	-0.030109	-0.745315	0.34347	1.82671	2.4424	0.162953	0.124032	-0.235	-0.201219	1.19375	YES	NO	NO
5	PF10_0281||PF3D7_1028700||merozoite TRAP-like protein (MTRAP)	0.017875	1.0069	0.162696	-1.15192	0.307072	-0.254287	0.083613	-0.947648	-0.11209	2.27143	1.50751	1.25289	0.138414	-0.079099	0.02799	0.617873	YES	NO	NO
5	PFD0715c||PF3D7_0414800||conserved Plasmodium protein, unknown function	-0.578918	0.443293	0.51577	-1.33532	0.762759	-0.253233	0.600905	-0.831312	0.215876	1.93477	1.69819	1.46795	-0.325149	-0.139334	0.117876	-0.163391	YES	NO	NO
5	PF11_0304||PF3D7_1129300||conserved Plasmodium protein, unknown function	-0.746713	1.49136	0.233772	-1.18837	0.627367	-0.268275	-0.147694	-0.262566	0.617407	1.50043	1.87627	-0.878795	0.252685	-0.19328	0.034363	0.612066	YES	NO	NO
5	PF11_0168a||PF3D7_1116100||serine esterase, putative	-0.308498	1.03896	0.02903	-1.45428	0.289213	-0.36586	-0.234382	-0.547212	0.57157	2.33644	0.726963	0.244159	0.222328	-0.284415	0.007265	0.308984	YES	NO	YES
5	MAL8P1.109||PF3D7_0810300||protein phosphatase, putative	0.117939	1.12437	-0.468386	-0.897439	0.406432	0.098396	-0.120964	-0.70771	0.221358	1.89406	1.13809	0.54583	0.309647	0.157084	-0.027993	0.659952	YES	NO	NO
5	PF14_0281||PF3D7_1430200||plasmepsin IX	-0.438104	0.628459	0.071219	-1.63168	0.241571	0.230796	0.048474	-0.081899	0.882471	1.23046	1.84304	-0.15975	-0.046625	-0.020742	-0.070874	0.837187	YES	NO	NO
5	PF07_0124||PF3D7_0729700||conserved Plasmodium protein, unknown function	1.1981	-0.77126	-0.997376	-1.52495	0.007515	-0.150967	0.275457	0.167803	0.903822	1.20886	1.11175	-0.278241	0.120021	-0.018352	-0.168592	-0.062574	YES	NO	NO
5	PFL2085w||PF3D7_1243400||conserved Plasmodium protein, unknown function	1.21107	0.222027	0.321946	-1.19418	0.421597	-0.330724	0.398848	-0.646125	0.414671	1.7361	0.405732	0.368804	-0.745216	-0.291525	0.108051	0.058944	YES	NO	NO
5	PFE0365c||PF3D7_0507400||conserved Plasmodium protein, unknown function	-0.556476	1.8897	1.42724	-1.2653	0.12373	-0.265748	0.306949	-0.333665	0.384432	1.72317	1.06645	1.39822	-0.000789	0.450474	0.080552	0.214896	YES	NO	NO
5	MAL7P1.176||PF3D7_0731500||erythrocyte binding antigen-175 (EBA175)	-0.598552	2.26574	0.598552	-2.33539	0.039027	0.183928	0.004802	-0.752864	-0.310777	2.41706	2.22421	1.91809	0.263234	0.470358	0.170552	0.341303	YES	NO	NO
5	MAL8P1.73||PF3D7_0817700||rhoptry neck protein 5 (RON5)	-0.399044	1.32256	-0.163346	-0.6592	0.247909	-0.069391	0.06268	-0.231239	0.624243	1.4565	2.70483	-1.09717	-0.336031	0.103005	-0.225728	1.17007	YES	NO	YES
5	PF08_0007||PF3D7_0828900||conserved Plasmodium protein, unknown function	-0.6623	1.28956	0.6623	-1.57521	0.252176	0.265344	-0.085881	-0.399627	0.528188	1.54881	1.44744	-0.145214	0.216211	0.142123	-0.24871	0.324045	YES	NO	NO
5	PF10_0301||PF3D7_1030800||calmodulin, putative	0.659147	0.44767	-0.596789	-1.48488	0.191164	0.264526	-0.11379	-0.436627	0.823958	1.18223	1.26177	-0.824542	-0.503312	-0.200649	-0.108206	0.465953	YES	NO	YES
5	PFB0815w||PF3D7_0217500||calcium-dependent protein kinase 1 (CDPK1)	-0.390608	0.461045	-0.86457	-0.456731	0.219956	0.092773	0.014596	-0.629689	0.252944	1.74732	2.027	-0.073334	0.47858	0.197226	0.217375	0.872407	YES	NO	YES
5	PFI1445w||PF3D7_0929400||high molecular weight rhoptry protein 2 (RhopH2)	-1.89964	0.042911	0.433728	-0.603742	0.041167	0.077732	-0.209831	-0.187249	1.61881	2.3457	2.53364	-1.50292	1.02024	0.371382	0.023696	0.817727	NO	NO	NO
5	PFI0175w-a||PF3D7_0903600||conserved Plasmodium protein, unknown function	-1.7418	0.007363	0.659874	-0.701516	0.743561	-0.410908	0.397941	-0.854568	1.66066	1.65406	0.532004	1.07664	0.447755	0.016043	0.047816	0.266889	YES	NO	YES
5	PFL1110c||PF3D7_1223100||cAMP-dependent protein kinase regulatory subunit (PKAr)	-0.978544	0.122696	0.608857	-1.24611	0.288857	-0.123493	0.215629	-0.329005	1.35639	1.82323	1.35079	-0.140913	0.415886	0.11728	-0.16787	1.0619	YES	NO	NO
5	PFE0315c||PF3D7_0506400||conserved Plasmodium protein, unknown function	0.149042	-1.66824	-0.828794	-1.03405	-0.049004	-0.028047	0.224607	-0.28164	1.21346	1.80256	1.04624	1.20786	-0.924806	-0.503153	-0.248208	-0.465611	YES	NO	YES
5	PF10_0071||PF3D7_1007200||rhoGAP GTPase, putative	-0.152838	0.518866	-0.496232	-0.791977	0.232008	-0.048979	-0.025352	0.053016	1.59354	1.52124	1.47482	-0.278912	0.316026	0.133411	-0.137654	0.982161	YES	NO	NO
5	PF14_0751||PF3D7_1477900||acyl-CoA synthetase, pseudogene (ACS1b)	0.203814	-2.06103	-0.631461	-0.384557	0.001632	-0.098041	0.299261	-0.293172	1.06785	1.89056	1.18704	1.91959	-0.416947	0.066029	-0.21463	-0.544923	YES	NO	NO
5	mal_mito_3||mal_mito_3||Cytochrome b	0.782987	0.352549	-0.413802	0.680224	-0.467095	0.253822	-0.252243	-0.044479	1.89766	2.29481	1.31002	-0.02063	0.209716	-0.005499	-0.34664	-0.595183	YES	NO	NO
5	PFC0700c||PF3D7_0316000||conserved Plasmodium protein, unknown function	-0.34179	-0.834018	-1.09052	-0.498564	0.220584	-0.029747	0.072402	-0.471632	0.984903	1.90685	0.426271	1.39464	-0.318133	0.141401	0.043255	0.364317	NO	NO	NO
5	PFB0765w||PF3D7_0216700||conserved Plasmodium protein, unknown function	-0.540921	-0.121863	0.128145	-0.713632	0.458552	-0.197607	-0.304916	-0.874928	0.954139	2.31898	0.362806	1.34895	-0.963465	-0.154839	-0.162512	0.103467	YES	NO	YES
5	PF14_0287||PF3D7_1430800||conserved Plasmodium protein, unknown function	-1.08172	-1.33664	-0.643964	-0.203522	-1.03706	0.087112	0.204005	-0.311587	1.00242	1.77283	1.3636	1.84584	0.458233	-0.153947	-0.360081	-0.346825	YES	NO	YES
5	MAL13P1.228||PF3D7_1345600||inner membrane complex protein	-1.32831	0.243562	1.14264	-1.69804	-0.188684	0.149938	0.111488	0.061535	1.30683	1.56682	1.61193	-0.561237	-0.309189	0.343465	0.054703	0.629129	YES	YES	YES
5	PFI1335w||PF3D7_0927200||zinc finger protein, putative	-1.22487	-1.73985	-0.789732	-0.922147	0.154358	0.069383	0.085389	-0.610198	0.857676	1.95106	1.07049	1.6857	-0.309507	0.194534	-0.161296	-0.043793	YES	YES	NO
5	PF14_0745||PF3D7_1477400||probable protein, unknown function	0.135848	-0.640469	0.474294	0.837892	-0.390424	-0.091424	-0.075827	-0.106135	0.659997	1.61489	1.78311	1.42763	0.953678	0.15353	-0.357194	-0.743492	NO	NO	NO
5	mal_mito_2||mal_mito_2||CoxI	0.773651	0.393101	-0.021841	0.602427	-0.413707	0.186907	-0.516642	-0.097219	1.7726	2.19515	1.34389	-0.036127	0.366729	-0.031793	-0.365446	-0.359886	YES	NO	NO
5	PF10_0355||PF3D7_1036300||merozoite surface protein (DBLMSP2)	0.867016	-2.94139	-3.06377	-3.02657	0.6018	0.059532	0.692242	-0.702381	1.48461	1.27633	1.87156	2.29691	-0.567573	-0.061151	0.538989	1.24636	YES	NO	NO
5	PFF0200c||PF3D7_0604100||transcription factor with AP2 domain(s),SPE2-interacting protein (SIP2)	-1.83473	2.00352	0.632492	-1.60579	0.514833	-0.194643	-0.54265	-0.229791	1.38931	1.49349	1.91975	-1.18046	-0.559554	0.162971	-0.172021	0.783726	YES	NO	YES
5	PF13_0269||PF3D7_1351600||glycerol kinase (GK)	-0.887693	-0.881595	0.021916	-0.354753	-0.040308	0.188623	0.022295	0.060016	1.64849	1.19635	0.444786	1.77359	-0.204001	-0.263077	-0.114949	-0.28566	YES	NO	NO
5	PF10_0063a||PF3D7_1006300||conserved Plasmodium protein, unknown function	-0.652797	-0.77619	-0.019163	0.724732	-0.229953	0.274923	0.334605	0.396601	1.50575	1.22107	0.672271	1.36282	0.138209	-0.184662	-0.397678	-0.209391	YES	NO	NO
5	PF14_0633a||PF3D7_1466500||conserved Plasmodium protein, unknown function	-1.29978	-0.230715	0.886444	0.838995	-0.230308	0.032092	0.287339	0.076373	1.47956	1.33847	0.595678	1.40684	-1.04531	-0.20878	0.137042	-0.389359	YES	NO	NO
5	PFD1007w||PF3D7_0421900||conserved Plasmodium protein, unknown function	-0.72204	-1.33984	0.389409	-0.586197	0.084851	-0.017723	0.46627	-0.190943	1.08701	1.5931	1.06196	1.64359	-0.560468	0.121514	-0.132663	-0.23456	YES	NO	NO
5	PFF0660w||PF3D7_0613600||conserved Plasmodium protein, unknown function	-0.221784	-0.227025	-0.467685	-0.827736	0.448255	-0.419296	0.236899	-0.340425	1.14066	1.52668	0.421777	0.779292	-0.118041	-0.012542	-0.110215	0.215883	YES	NO	NO
5	PF13_0314||PF3D7_1358600||zinc finger protein, putative	-1.30877	-0.887111	-0.881115	-1.40675	0.504875	-0.139597	0.225621	0.089142	1.34742	1.31706	1.24211	0.352818	-0.168462	-0.333488	-0.244157	0.088711	YES	NO	NO
5	PF14_0353||PF3D7_1437300||conserved Plasmodium protein, unknown function	-1.00319	1.11154	0.182727	-0.847584	0.237691	0.10487	-0.001342	-0.081029	1.31735	1.32565	1.58297	-0.862228	0.420634	-0.010309	-0.171652	0.452275	YES	NO	NO
5	PFE0340c||PF3D7_0506900||rhomboid protease ROM4 (ROM4)	-0.856006	0.471133	0.331504	-1.7708	0.138076	0.495635	-0.508728	-0.328185	1.01152	1.84433	2.01235	-0.791293	-0.290809	0.641025	-0.07413	0.346961	YES	NO	NO
5	PFL0470w||PF3D7_1209400||conserved Plasmodium protein, unknown function	-1.79252	-0.698544	1.50511	-1.25562	0.231321	-0.096516	0.017501	-0.437403	1.19701	1.41359	0.213514	1.37578	-0.301153	0.239623	0.035072	0.229802	YES	NO	NO
5	PFL1015w-a||PF3D7_1221100||conserved Plasmodium protein, unknown function	-0.612168	-0.690262	-0.693951	0.018928	0.006348	0.097052	-0.352858	-0.183377	1.20426	1.38869	1.02464	0.094769	0.620307	-0.39596	-0.388893	-0.289593	YES	NO	NO
5	PFI0785c||PF3D7_0916000||sugar transporter, putative	-0.763567	-0.60677	-0.212837	-0.878895	0.543637	0.039832	-0.143628	-0.289906	1.06716	1.51278	1.67985	-0.854346	0.744253	0.106815	0.271999	0.560331	YES	YES	YES
5	PF14_0744||PF3D7_1477300||Plasmodium exported protein, unknown function (Pfg14-744)	0.190968	-0.403244	0.715177	0.181698	-0.236285	-0.351645	-0.293407	-0.520103	0.40834	1.1035	1.46886	1.91741	-0.349064	0.063667	-0.260979	-0.364476	YES	NO	NO
5	PF13_0173||PF3D7_1332200||conserved Plasmodium protein, unknown function	0.298855	0.221243	-1.61194	-0.397415	1.00548	0.678876	0.330928	-0.662485	1.02182	1.53338	1.95895	-0.192032	-0.660034	0.150245	0.329651	0.598911	YES	NO	NO
5	PFL1025c||PF3D7_1221300||conserved Plasmodium protein, unknown function	-0.545281	0.633623	-0.336639	-0.601852	0.202904	-0.137899	-0.023451	-0.028391	1.34942	1.202	1.46151	-0.616735	-0.884071	-0.034365	-0.153294	0.545785	YES	NO	NO
5	PFE1205c||PF3D7_0524200||conserved Plasmodium membrane protein, unknown function	0.330483	-1.85564	-1.67525	-1.3368	-0.218421	0.419812	-0.104888	0.222343	1.04156	1.4979	1.64066	0.2948	0.391424	0.200248	-0.038055	-0.097249	YES	NO	NO
5	PF11_0168||PF3D7_1116000||rhoptry neck protein 4 (RON4)	-0.574263	0.889344	-1.03279	-0.364706	0.26611	-0.225946	-0.167122	-0.291399	1.04227	1.49178	2.70682	-0.548569	0.161907	0.090671	-0.09693	0.87737	YES	NO	NO
5	PFD0085c||PF3D7_0401900||acyl-CoA synthetase (ACS6)	-1.08006	-2.53208	-0.454978	-1.8659	-0.289016	0.121851	-0.518296	-0.549855	1.06173	1.45397	0.704416	2.52425	-0.314122	-0.036304	-0.474481	-0.735361	YES	NO	NO
5	PFB0650w||PF3D7_0214300||conserved Plasmodium protein, unknown function	-0.414523	-0.960286	-0.323547	0.114612	0.132273	-0.19633	0.028357	-0.377496	0.891665	1.54671	1.08271	1.42366	0.318485	-0.133473	-0.429563	-0.433661	YES	YES	YES
5	PFD0700c||PF3D7_0414500||RNA binding protein, putative	-0.838108	-0.426341	0.728148	0.706234	-0.139074	0.155158	0.107522	-0.156765	1.25344	1.22515	0.78882	1.85751	-0.794187	-0.022835	-0.114563	-0.487733	YES	NO	NO
5	MAL8P1.13||PF3D7_0828600||folate transporter 1 (FT1)	0.578265	-2.33468	-2.48519	-2.0408	-0.155198	0.371228	-0.090804	0.231789	0.928751	1.52924	2.04424	-0.661688	0.65903	0.175626	0.184163	0.323024	YES	NO	NO
5	PF10_0177a||PF3D7_1018200||serine/threonine protein phosphatase, putative	-0.345429	0.218617	-0.504946	-0.605288	0.268778	-0.082292	-0.427883	-0.183529	1.28051	1.17578	1.82791	-0.849627	-0.801333	0.053704	-0.090574	0.914387	YES	NO	YES
5	PF08_0129||PF3D7_0802800||serine/threonine protein phosphatase, putative	-0.116839	0.531869	-0.286164	-0.796068	0.244594	0.026119	0.037422	-0.274805	0.98815	1.46372	1.6651	-0.796899	-0.424584	0.008013	-0.228907	0.539384	YES	NO	NO
5	PFL1165w||PF3D7_1224200||conserved Plasmodium protein, unknown function	-0.214521	-0.461743	-0.855178	-0.579185	0.176215	-0.068271	0.139716	-0.325414	0.711934	1.71571	0.826104	0.893936	-0.092972	0.079615	0.333315	0.403915	NO	NO	NO
5	PFI0905w||PF3D7_0918500||telomerase RNA	1.19148	0.553601	-0.49063	-0.924394	-0.163797	-0.046047	-0.630026	-0.433256	2.07033	1.26409	1.3517	-0.427823	-0.612131	-0.169029	-0.285525	0.306241	YES	NO	NO
5	MAL13P1.475||PF3D7_1372100||Plasmodium exported protein (PHISTb), unknown function (GEXP04)	-0.475535	-0.330642	0.043937	0.065502	-0.176007	-0.855132	-0.777203	-0.951393	0.558941	0.947742	1.57065	1.74823	-0.540795	-0.44574	-0.925332	-0.814336	YES	NO	NO
5	PFI0460w||PF3D7_0909500||subpellicular microtubule protein 1, putative (SPM1)	0.301799	-1.55861	-2.11477	-1.11343	0.177432	0.190073	0.069276	0.050765	1.08088	1.31401	1.41624	0.498704	-0.126719	0.245616	-0.467602	0.332419	YES	NO	NO
5	PF08_0136||PF3D7_0801400||probable protein, unknown function	-0.41405	-0.252931	0.007517	-0.101631	-0.275433	0.351035	0.200282	0.273721	0.972128	1.42036	1.24152	1.22645	-0.650399	0.021198	-0.151457	-0.60301	YES	NO	YES
5	PF11_0479||PF3D7_1146800||conserved Plasmodium protein, unknown function	-1.18053	-0.974443	0.211364	0.629343	0.069829	-0.217652	0.211132	-0.124135	0.814539	1.80311	0.69844	1.4084	0.329326	-0.011434	0.044474	-0.365181	YES	NO	YES
5	PF11_0037||PF3D7_1102500||Plasmodium exported protein (PHISTb), unknown function (GEXP02)	-1.05069	-0.321944	0.956087	-0.698692	-0.537334	-0.417016	0.253032	-0.790571	0.740669	1.78552	1.00066	1.38814	-0.441104	-0.297394	-0.051321	-0.099629	YES	NO	YES
5	PFA0445w||PF3D7_0109100||LCCL domain-containing protein (CCp5)	0.150693	-0.665462	-1.35807	-0.97335	0.251205	0.069832	-0.422721	-0.278548	1.30589	1.01845	1.06145	1.50582	-0.149152	-0.349377	-0.783176	-0.073312	YES	NO	YES
5	MAL8P1.12||PF3D7_0828700||conserved Plasmodium protein, unknown function	0.38756	-0.662551	-1.66565	-0.862349	0.959683	-0.317932	0.514742	-0.302398	0.879181	1.42762	1.22375	-0.538862	-0.073504	-0.49631	0.378174	0.399303	YES	NO	YES
5	PFL1260w||PF3D7_1226100||hydrolase/phosphatase, putative	-0.359229	-1.33457	-0.906565	-0.046197	0.131677	-0.186167	-0.213295	-0.163891	1.27648	1.31818	0.834108	0.657431	-0.717778	-0.153873	-0.325723	0.128646	YES	NO	YES
5	PFA0260c||PF3D7_0105300||cyclase-associated protein, putative (CAP)	-0.963274	0.847924	1.48313	-2.22235	0.33033	-0.15029	-0.123517	-0.291576	1.04364	1.39308	1.12756	-0.758017	-1.01376	-0.245396	-0.274784	0.607622	YES	NO	NO
5	PFE1260c||PF3D7_0525300||conserved Plasmodium protein, unknown function	-0.13711	-0.718706	-0.658593	-0.667931	0.422087	-0.33201	0.291419	-0.275196	0.185932	2.05056	0.764506	0.939319	0.12148	0.345799	0.05107	0.261624	YES	NO	NO
5	PF10_0254||PF3D7_1025900||conserved Plasmodium protein, unknown function	1.87428	-0.557565	-1.3139	-0.552046	0.042707	0.017413	-0.375875	-0.299816	0.600864	1.64312	2.50001	-0.758264	0.133442	-0.042091	-0.034395	0.248142	YES	NO	NO
5	PFE0400w||PF3D7_0508100||SET domain protein, putative (SET9)	0.938656	-1.6729	-2.69137	-1.11173	0.277896	0.110949	-0.581736	0.004319	0.863078	1.34633	1.78819	-0.503713	0.147014	0.459905	-0.233031	0.314852	YES	NO	YES
5	MAL7P1.162||PF3D7_0729900||dynein heavy chain, putative	0.174836	-1.15511	-1.17697	-0.394469	0.173201	0.072452	-0.091722	0.071892	0.995682	1.21239	1.59954	0.780617	-0.169792	-0.094966	-0.314681	-0.079981	YES	NO	NO
5	PF13_0255||PF3D7_1348600||conserved Plasmodium protein, unknown function	-0.333426	0.30472	-0.262706	-0.931935	-0.04791	0.019759	-0.082933	0.057341	1.1722	1.02526	1.30709	-0.912533	0.345289	0.19502	0.052001	0.534368	YES	NO	NO
5	PF14_0586||PF3D7_1461400||conserved Plasmodium protein, unknown function	0.202626	-0.223371	-1.35014	-0.269658	0.319612	-0.003011	0.125182	-0.285893	0.961433	1.23018	1.15336	0.081968	-0.236888	-0.196262	-0.021574	0.814908	YES	NO	NO
5	PF14_0333||PF3D7_1435200||conserved Plasmodium protein, unknown function	-0.201756	-1.32976	-1.16032	-1.85895	0.242651	0.017651	-0.105384	-0.157414	0.960065	1.22656	1.96791	-0.526499	0.213677	-0.222603	-0.031228	0.477707	YES	NO	NO
5	PF11_0481||PF3D7_1147200||tubulin-tyrosine ligase, putative	-0.522872	-1.16353	-0.772786	-0.800407	0.357681	0.184623	0.095552	0.103504	1.06435	1.11739	1.06662	0.300389	-0.749052	-0.196969	-0.044523	0.03934	YES	NO	NO
5	MAL7P1.137||PF3D7_0724800||kelch protein, putative	-0.185687	-1.57343	-0.887561	-1.28625	0.007218	-0.201469	-0.105569	-0.264044	1.1197	1.43202	0.27245	0.564591	-0.259844	0.199984	-0.1096	0.047746	YES	NO	NO
5	PF13_0225||PF3D7_1341500||conserved Plasmodium protein, unknown function	-0.237159	-0.083259	-0.815923	-0.246592	0.513847	-0.196466	0.130548	0.137497	0.860082	1.3136	1.43043	-0.34543	-0.93425	-0.0799	0.158003	0.824852	YES	NO	NO
5	PF11_0392||PF3D7_1138000||conserved Plasmodium protein, unknown function	-0.361345	0.205231	-0.196971	-0.860912	0.515006	-0.29713	-0.397075	-0.25787	1.03758	1.46632	1.55301	-1.11759	-0.684262	-0.281142	-2e-06	0.478336	YES	NO	NO
5	PFL2510w||PF3D7_1252200||chitinase (CHT1)	1.18795	-1.92466	-0.211244	0.017102	0.223682	0.218417	0.188414	-0.391186	0.566185	1.58228	0.628877	1.84871	0.148494	-0.363264	-0.02641	0.188234	YES	NO	NO
5	PF13_0120||PF3D7_1320700||conserved Plasmodium protein, unknown function	-0.619571	0.135268	-0.281661	-0.960834	0.189146	-0.133247	-0.411774	-0.157413	1.6529	1.09998	1.45792	-0.914017	0.323952	-0.073383	-0.078764	0.445855	YES	NO	NO
5	PF11_0300||PF3D7_1128900||conserved Plasmodium protein, unknown function	-2.06113	-0.170705	0.497864	-0.954649	0.394528	-0.068667	-0.156381	-0.154073	0.954313	1.20345	1.59781	-1.48387	-0.161694	0.125053	-0.018441	0.764	YES	NO	NO
5	MAL13P1.331||PF3D7_1366100||conserved Plasmodium protein, unknown function	0.044544	0.303639	-0.816758	-0.782792	0.332832	-0.140303	0.406895	-0.215002	1.28992	0.820108	0.179169	0.945431	-0.398471	0.048192	-0.437057	0.131489	YES	NO	NO
5	MAL13P1.296||PF3D7_1359700||conserved Plasmodium protein, unknown function	-1.12043	0.174326	0.04152	-0.225844	0.511751	-0.148201	-0.309819	-0.191937	0.52562	1.58255	1.27011	-0.435257	-0.656781	-0.278388	0.026133	0.348785	YES	NO	NO
5	PF14_0792||PF3D7_1461700||conserved Plasmodium protein, unknown function	0.189745	0.068128	0.22804	0.565547	-0.666491	0.14269	-0.012806	-0.354055	0.098298	1.75305	1.21736	0.888467	-1.01261	-0.253778	-0.359597	-1.10254	YES	YES	YES
5	MAL8P1.205||PF3D7_0831300||Plasmodium exported protein, unknown function (GEXP13)	-1.54626	-1.01397	-0.102256	-0.807402	0.420177	-0.243667	0.085059	-0.493468	0.884346	1.91825	0.438633	1.24086	-0.593605	-0.575896	0.081966	-0.020164	YES	NO	NO
5	PFL1700c||PF3D7_1235200||V-type K -independent H -translocating inorganic pyrophosphatase (VP2)	-2.66582	-0.190629	-0.234495	-0.443039	0.088135	0.33609	-0.201485	-0.024064	0.745542	1.34903	2.21907	-0.419546	0.483175	0.171757	0.027966	0.517329	YES	NO	NO
5	PFD0425w||PF3D7_0408600||sporozoite invasion-associated protein 1 (SIAP-1)	0.650229	-0.926083	-0.722994	0.534254	-0.340877	0.333674	-0.180356	-0.340331	0.907684	1.18275	0.699805	0.808743	0.482721	0.1117	-0.183682	-0.228328	YES	NO	NO
5	PFE1545c||PF3D7_0530900||formin 1	0.023201	-0.029425	-0.495339	-0.688424	0.457155	-0.101385	-0.43209	-0.245195	1.11683	0.971707	1.91634	-0.478233	-0.487022	-0.235909	-0.311592	0.370613	YES	NO	NO
5	MAL13P1.38||PF3D7_1308000||conserved Plasmodium membrane protein, unknown function	-2.1465	0.312226	1.41699	-1.51687	0.908393	-0.061873	-0.097735	0.140182	1.94826	0.980048	1.03303	-0.720941	0.62463	0.448751	-0.402043	0.2106	NO	NO	NO
5	PFL0475w||PF3D7_1209500||cGMP-specific phosphodiesterase	-0.360529	1.09802	-0.04848	-0.843197	0.124717	0.092983	0.096748	-0.057152	0.6117	1.42855	1.2158	-0.838006	-0.441217	-0.061199	0.14951	0.683255	YES	NO	YES
5	PFC0610c||PF3D7_0314700||zinc finger protein, putative	-1.30939	-0.953134	-0.226492	-0.024795	0.017815	-0.154402	0.315504	-0.517037	0.99121	1.7394	0.406214	1.14604	-0.929555	-0.091338	-0.069109	-0.116836	YES	NO	NO
5	PFD1105w||PF3D7_0423400||asparagine-rich protein (AARP)	-2.98726	0.498131	0.009856	-1.01552	0.774225	0.032254	-0.02157	-0.232049	1.02465	0.986797	2.00358	-0.796137	1.06722	0.326411	-0.082819	0.626934	NO	NO	NO
5	PF10_0308||PF3D7_1031400||OTU-like cysteine protease, putative	0.084054	0.531596	-0.1411	-0.843341	0.477417	0.1875	-0.135376	0.054166	0.618601	1.3837	1.15819	-0.558079	0.002064	-0.004625	0.120782	0.68025	NO	NO	NO
