# Supplementary material for: Capturing in vivo RNA transcriptional dynamics from the malaria parasite Plasmodium falciparum
Source: HighWire-hosted journal article supplement (doi:10.1101/gr.217356.116), 2017-04-17
Supplement: Supplemental_Table_S3.xlsx [file Supplemental_Table_S3.xlsx]

## Sheet: Sheet1
Table S3: Summary excel file detailing all genes identified by DNA microarray analysis with annotated functions and comparisons to previously published transcriptomic and proteomic data sets. In addition, the median fold change in 3D7 gametocyte-specific transcription and stability is listed accompanied by the predicted regulatory control mechanism for each gene. Columns A–C: Gene ID and annotati…
Gene Information			Median Log2 Fold Change		Gametocyte Enriched (>1 fold change)		Regulation	Previous Data-Sets Indicating Sexual Stage Transcript										Previous Data-Sets Indicating Sexual Stage Protein				Gametocyte Prevelance	Comparison of This Study to Previous Studies		NOVEL Gametocyte Gene
GeneID	Old GeneID	Description	3D7 Gam Specific Transcription	3D7 Gam Specific Stabilization	Gametocyte transcription	Gametocyte stabilzation	mRNA Control	Stage I-II transcript (Silvestrini et al., 2005)	Gametocyte transcript (Young et al., 2005)	Stage I-II transcript (Eksi et al., 2005)	Stage I-II transcript (Eksi et al., 2012)	Transcript downregulated in DOZI/CITH KO (Mair et al., 2010)	Stage II transcript enriched 2-fold (Lopez-Barragan et al., 2011)	Stage V tranascript enriched 2-fold (Lopez-Barragan et al., 2011)	Ookinete transcript enriched 20-fold (Lopez-Barragan et al., 2011)	Gameotcyte-Ookinete transcript present (Lopez-Barragan et al., 2011)	Stage I-II transcript in HP1off (Brancucci et al., 2014)	Stage I-II peptide (Silvestrini et al., 2010)	Stage V peptide (Silvestrini et al., 2010)	Male-Female Gametocyte Peptide (Tao et al., 2014)	Male-Female Stage V Gametocyte Peptide (Tao et al., 2014)	Times previously identified	Identified in this study	Previously identified as enriched	NEW
PF3D7_0406200	PFD0310w	sexual stage-specific protein precursor (Pfs16)	-0.57697	2.86863		√	stabilized		√		√		√	√	√	√		√	√			8	YES	YES
PF3D7_0422000	PFD1035w	steroid dehydrogenase, putative	-0.144376	0.911536									√	√	√	√	√	√	√	√		8	NO	YES
PF3D7_0103800	PFA0190c	actin-related protein (ARP1)	-1.13123	0.629371					√				√	√	√	√		√	√	√		8	NO	YES
PF3D7_0508200	PFE0405c	longevity-assurance (LAG1) domain protein, putative	-0.094162	0.466485					√				√	√	√	√		√	√	√		8	NO	YES
PF3D7_1031000	PF10_0303	25 kDa ookinete surface antigen precursor (Pfs25)	0.665702	2.58664		√	stabilized		√			√	√		√	√			√	√	√	8	YES	YES
PF3D7_1216500	PFL0795c	male development gene 1 (MDV1)	0.322552	1.89461		√	stabilized	√	√		√		√		√	√		√	√			8	YES	YES
PF3D7_1431100	PF14_0290	conserved Plasmodium protein, unknown function	-1.43211	1.64746		√	stabilized		√		√		√		√	√		√	√	√		8	YES	YES
PF3D7_0927200	PFI1335w	zinc finger protein, putative	-1.2983	1.3781		√	stabilized		√				√	√	√	√		√	√	√		8	YES	YES
PF3D7_0109100	PFA0445w	LCCL domain-containing protein (CCp5)	-0.949348	1.18367		√	stabilized		√				√	√	√	√			√	√	√	8	YES	YES
PF3D7_0513700	PFE0680w	secreted ookinete protein, putative (PSOP12)	-0.0758815	1.01715		√	stabilized		√				√	√	√	√			√	√	√	8	YES	YES
PF3D7_1346800	PF13_0248	6-cysteine protein (P47)	1.2548	0.828298	√		transcribed		√		√		√		√	√		√	√	√		8	YES	YES
PF3D7_0525900	PFE1290w	NIMA related kinase 2 (NEK2)	0.277598	0.708139					√				√	√	√	√			√	√	√	8	NO	YES
PF3D7_0719200	MAL7P1.100	NIMA related kinase 4 (NEK4)	1.68641	0.644523	√		transcribed		√				√	√	√	√			√	√	√	8	YES	YES
PF3D7_0209000	PFB0405w	6-cysteine protein (P230)	1.32417	0.628826	√		transcribed		√				√	√	√	√		√	√	√		8	YES	YES
PF3D7_0825900	PF08_0023	conserved Plasmodium protein, unknown function	1.3916	0.546972	√		transcribed		√				√	√	√	√		√	√	√		8	YES	YES
PF3D7_0809700	PF08_0100	RuvB DNA helicase, putative	0.323685	0.418479					√				√	√	√	√		√	√	√		8	NO	YES
PF3D7_0822500	MAL8P1.46	dynein light chain 1 (DLC1)	1.29135	0.199004	√		transcribed		√				√	√	√	√		√	√	√		8	YES	YES
PF3D7_1327300	PF13_0161	conserved Plasmodium protein, unknown function	-0.577901	1.71355		√	stabilized	√				√	√		√	√		√	√			7	YES	YES
PF3D7_0721700	PF07_0089	secreted ookinete protein, putative (PSOP1)	0.17889	0.925753					√				√	√	√	√		√	√			7	NO	YES
PF3D7_0518700	PFE0935c	mRNA-binding protein PUF1 (PUF1)	-0.75509	0.683901									√	√	√	√			√	√	√	7	NO	YES
PF3D7_0615100	PFF0730c	enoyl-acyl carrier reductase (ENR)	0.795924	0.598897	√		transcribed		√				√	√	√	√		√	√			7	YES	YES
PF3D7_0915700	PFI0770c	conserved Plasmodium protein, unknown function	-1.78633	0.527941									√	√	√	√		√	√	√		7	NO	YES
PF3D7_1020300	PF10_0196	cytoplasmic dynein intermediate chain, putative	0.142024	0.508461					√				√		√	√			√	√	√	7	NO	YES
PF3D7_0618500	PFF0895w	malate dehydrogenase (MDH)	-0.974345	0.485393					√				√	√	√	√		√	√			7	NO	YES
PF3D7_0927100	PFI1330c	conserved Plasmodium protein, unknown function	-0.848556	0.465415									√	√	√	√		√	√	√		7	NO	YES
PF3D7_0620100	PFF0980w	conserved Plasmodium protein, unknown function	-0.286555	0.321383									√	√	√	√		√	√	√		7	NO	YES
PF3D7_0922900	PFI1125c	beta-ketoacyl-acyl carrier protein reductase (FabG)	1.6642	0.208826	√		transcribed		√				√	√	√	√		√	√			7	YES	YES
PF3D7_0103000	PFA0150c	conserved Plasmodium protein, unknown function	0.201411	0.189984									√	√	√	√			√	√	√	7	NO	YES
PF3D7_0825400	MAL8P1.25a	conserved Plasmodium protein, unknown function	-0.793661	0.119314									√	√	√	√			√	√	√	7	NO	YES
PF3D7_0816400	MAL8P1.79	conserved Plasmodium protein, unknown function	0.30037	-0.005599									√	√	√	√			√	√	√	7	NO	YES
PF3D7_0920500	PFI1005w	ADP-ribosylation factor, putative	1.37524	-0.0637295	√		transcribed	√					√	√	√	√		√	√			7	YES	YES
PF3D7_0623500	PFF1130c	superoxide dismutase (SOD2)	-1.41999	-0.100411									√	√	√	√		√	√	√		7	NO	YES
PF3D7_0913400	PFI0655c	conserved Plasmodium protein, unknown function	-0.40579	-0.107011									√	√	√	√		√	√	√		7	NO	YES
PF3D7_1477700	PF14_0748	Plasmodium exported protein (PHISTa), unknown function (Pfg14-748)	-0.994311	1.95287		√	stabilized			√	√		√		√	√		√	√			7	YES	YES
PF3D7_1430800	PF14_0287	conserved Plasmodium protein, unknown function	-0.77008	1.56822		√	stabilized		√				√		√	√		√	√	√		7	YES	YES
PF3D7_0831300	MAL8P1.205	Plasmodium exported protein, unknown function (GEXP13)	-0.910686	1.06261		√	stabilized						√	√	√	√	√	√	√			7	YES	YES
PF3D7_0303900	PFC0176c	conserved Plasmodium protein, unknown function	0.046083	0.847815					√				√	√	√	√		√	√			7	NO	YES
PF3D7_1413200	PF14_0131	conserved Plasmodium protein, unknown function	0.779746	0.75815					√				√		√	√			√	√	√	7	NO	YES
PF3D7_1006100	PF10_0062	CCR4-NOT transcription complex subunit 5, putative (NOT5)	0.309186	0.731015					√				√	√	√	√		√	√			7	NO	YES
PF3D7_0931900	PFI1550c	conserved Plasmodium protein, unknown function	-0.396464	0.7297					√				√	√		√			√	√	√	7	NO	YES
PF3D7_1218800	PFL0915c	conserved Plasmodium protein, unknown function (PSOP17)	1.9086	0.660185	√		transcribed		√				√		√	√			√	√	√	7	YES	YES
PF3D7_0107000	PFA0345w-a	centrin-1 (CEN1)	-0.707229	0.535669									√	√	√	√		√	√	√		7	NO	YES
PF3D7_1423400	PF14_0225	conserved Plasmodium membrane protein, unknown function	0.167645	0.500614					√				√		√	√			√	√	√	7	NO	YES
PF3D7_1113900	PF11_0147	mitogen-activated protein kinase 2 (MAP2)	0.747883	0.498473	√		transcribed		√				√		√	√			√	√	√	7	YES	YES
PF3D7_0307300	PFC0305w	EB1 homolog, putative	0.1378	0.496001	√		transcribed		√					√	√	√			√	√	√	7	YES	YES
PF3D7_0417000	PFD0820w	conserved Plasmodium protein, unknown function	1.84555	0.454473	√		transcribed						√	√	√	√		√	√	√		7	YES	YES
PF3D7_1349000	MAL13P1.247	conserved Plasmodium protein, unknown function	1.24078	0.442213	√		transcribed		√				√		√	√			√	√	√	7	YES	YES
PF3D7_1114000	PF11_0148	dynein light chain type 2, putative	1.1095	0.377323	√		transcribed		√				√		√	√			√	√	√	7	YES	YES
PF3D7_0309100	PFC0381c	conserved Plasmodium protein, unknown function	0.149443	0.283118					√				√	√	√	√		√	√			7	NO	YES
PF3D7_0513000	PFE0645w	conserved Plasmodium protein, unknown function	0.995962	0.270532									√	√	√	√			√	√	√	7	NO	YES
PF3D7_1128300	PF11_0294	6-phosphofructokinase (PFK11)	1.05338	0.234161	√		transcribed		√				√		√	√			√	√	√	7	YES	YES
PF3D7_0928100	PFI1380c	conserved Plasmodium protein, unknown function	0.657385	0.19584					√					√	√	√			√	√	√	7	NO	YES
PF3D7_1251000	PFL2450c	conserved Plasmodium protein, unknown function	1.22951	0.193989	√		transcribed		√				√		√	√			√	√	√	7	YES	YES
PF3D7_0922000	PFI1080w	dynein intermediate chain 2, ciliary	0.974951	0.140757					√				√	√		√			√	√	√	7	NO	YES
PF3D7_0605300	PFF0260w	serine/threonine protein kinase (ARK1)	0.782515	0.139376									√	√	√	√			√	√	√	7	NO	YES
PF3D7_0313600	PFC0570c	conserved Plasmodium protein, unknown function	0.011846	0.0990185					√					√	√	√			√	√	√	7	NO	YES
PF3D7_0608600	PFF0425w	conserved Plasmodium protein, unknown function	-0.172768	0.0849485					√				√	√	√	√		√	√			7	NO	YES
PF3D7_0907500	PFI0360c	conserved Plasmodium protein, unknown function	n.d.	n.d.									√	√	√	√		√	√			6	NO	YES
PF3D7_0109000	PFA0440w	photosensitized INA-labeled protein 1, PhIL1, putative	-3.33929	1.99777		√	stabilized						√	√	√	√		√	√			6	YES	YES
PF3D7_1016900	PF10_0164	early transcribed membrane protein 10.3 (ETRAMP10.3)	-0.17826	1.53459		√	stabilized	√					√		√	√		√	√			6	YES	YES
PF3D7_1351600	PF13_0269	glycerol kinase (GK)	-0.618174	1.42242		√	stabilized	√	√						√	√		√	√			6	YES	YES
PF3D7_1246400	PFL2225w	myosin light chain 1,myosin A tail domain interacting protein (MTIP)	-1.35587	1.28395		√	stabilized	√				√	√		√	√			√			6	YES	YES
PF3D7_1222700	PFL1090w	glideosome-associated protein 45 (GAP45)	-3.54773	1.22037		√	stabilized	√				√			√	√		√	√			6	YES	YES
PF3D7_0628100	PFF1365c	HECT-domain (ubiquitin-transferase), putative	-1.79376	0.975789				√				√			√	√				√	√	6	NO	YES
PF3D7_1128600	PF11_0297	CCR4-NOT transcription complex subunit 2, putative (NOT2)	0.314002	0.847723					√				√		√	√		√	√			6	NO	YES
PF3D7_0914400	PFI0705w	conserved Plasmodium protein, unknown function	-2.39299	0.842726									√	√	√	√		√	√			6	NO	YES
PF3D7_0416500	PFD0800c	conserved Plasmodium protein, unknown function	-0.737095	0.823468									√	√	√	√		√	√			6	NO	YES
PF3D7_1472900	PF14_0697	dihydroorotase, putative	-2.00996	0.780198									√			√	√	√	√	√		6	NO	YES
PF3D7_1127600	PF11_0287	CRAL/TRIO domain-containing protein, putative	-2.77784	0.746671				√					√		√	√		√	√			6	NO	YES
PF3D7_1472600	PF14_0694	protein disulfide isomerase (PDI-14)	-2.7619	0.706299				√							√	√			√	√	√	6	NO	YES
PF3D7_0920000	PFI0980w	long chain fatty acid elongation enzyme, putative	-0.412829	0.541554					√				√	√		√	√	√				6	NO	YES
PF3D7_1358400	MAL13P1.287	conserved Plasmodium protein, unknown function	-1.31842	0.509905									√		√	√			√	√	√	6	NO	YES
PF3D7_0510300	PFE0510c	stripes inner membrane complex protein, putative (SIP)	1.8333	0.428014	√		transcribed						√	√	√	√		√	√			6	YES	YES
PF3D7_1430900	PF14_0288	cytochrome c oxidase subunit II precursor, putative	0.793195	0.339674									√		√	√			√	√	√	6	NO	YES
PF3D7_1469200	PF14_0660	protein phosphatase, putative	-0.116389	0.318899				√					√		√	√		√	√			6	NO	YES
PF3D7_0906400	PFI0315c	dynein light intermediate chain 2, cytosolic	0.647216	0.311566										√	√	√		√	√	√		6	NO	YES
PF3D7_0816200	PF08_0064	vacuolar protein-sorting protein VPS2, putative	0.548697	0.281884									√	√	√	√			√	√		6	NO	YES
PF3D7_0906100	PFI0300w	developmental protein, putative	-1.16266	0.274276									√		√	√		√	√	√		6	NO	YES
PF3D7_0109400	PFA0460c	tubulin-specific chaperone a, putative	-1.7414	0.228774									√	√	√	√		√	√			6	NO	YES
PF3D7_1420900	PF14_0774	mannose-1-phosphate guanyltransferase, putative	-1.54911	0.20683									√		√	√			√	√	√	6	NO	YES
PF3D7_0623900	PFF1150w	ribonuclease HII, putative	-0.028096	0.187077										√	√	√		√	√	√		6	NO	YES
PF3D7_1011000	PF10_0107	conserved protein, unknown function	-0.712897	0.179415									√	√	√	√		√	√			6	NO	YES
PF3D7_0815400	MAL8P1.85	conserved Plasmodium protein, unknown function	-0.976577	0.169281									√	√		√		√	√	√		6	NO	YES
PF3D7_0905000	PFI0245c	conserved Plasmodium protein, unknown function	-0.821129	0.148852									√	√		√		√	√	√		6	NO	YES
PF3D7_0320700	PFC0912w	signal peptidase complex subunit 2, putative (SPC2)	-0.10601	0.143654										√	√	√			√	√	√	6	NO	YES
PF3D7_0311800	PFC0500w	conserved protein, unknown function	0.108259	0.117809										√	√	√		√	√	√		6	NO	YES
PF3D7_0320800	PFC0915w	ATP-dependent RNA helicase, putative (DOZI)	-0.443985	0.0962795									√	√	√	√		√	√			6	NO	YES
PF3D7_1017400	PF10_0169	phosphomannomutase, putative	-1.3272	0.0682055									√		√	√		√	√	√		6	NO	YES
PF3D7_0611300	PFF0555w	conserved Plasmodium protein, unknown function	-0.780092	0.0504765									√	√		√		√	√	√		6	NO	YES
PF3D7_0813500	PF08_0080	conserved Plasmodium protein, unknown function	-1.25077	-0.0150265									√	√	√	√		√	√			6	NO	YES
PF3D7_1142800	PF11_0440	conserved Plasmodium protein, unknown function	-0.665105	-0.022326									√		√	√		√	√	√		6	NO	YES
PF3D7_1439600	PF14_0375	conserved Plasmodium protein, unknown function	1.32787	-0.035246	√		transcribed						√		√	√		√	√	√		6	YES	YES
PF3D7_1432700	PF14_0309	protein-L-isoaspartate O-methyltransferase beta-aspartate methyltransferase, putative	-0.787802	-0.03596									√		√	√		√	√	√		6	NO	YES
PF3D7_0907300	PFI0350c	conserved Plasmodium protein, unknown function	-0.287058	-0.110346									√	√		√		√	√	√		6	NO	YES
PF3D7_0904400	PFI0215c	signal peptidase complex subunit 3, putative (SPC3)	-0.517772	-0.12354									√	√		√		√	√	√		6	NO	YES
PF3D7_1460400	PF14_0576	ubiquitin carboxyl-terminal hydrolase isozyme L3 (UCHL3)	1.54572	-0.133941	√		transcribed						√		√	√			√	√	√	6	YES	YES
PF3D7_0718500	MAL7P1.94	prefoldin subunit 3, putative	0.513674	-0.166525									√	√		√		√	√	√		6	NO	YES
PF3D7_0802900	MAL8P1.148	conserved Plasmodium protein, unknown function	1.15156	-0.199286	√		transcribed						√	√	√	√		√	√			6	YES	YES
PF3D7_0107400	PFA0370w	conserved Plasmodium protein, unknown function	1.29831	-0.222612	√		transcribed						√	√		√		√	√	√		6	YES	YES
PF3D7_1010100	PF10_0098	conserved Plasmodium protein, unknown function	-1.89606	-0.226542									√	√		√		√	√	√		6	NO	YES
PF3D7_0509000	PFE0445c	SNAP protein (soluble N-ethylmaleimide-sensitive factor Attachment Protein), putative	-1.69091	-0.258544									√	√	√	√		√	√			6	NO	YES
PF3D7_0513800	PFE0690c	Rab GTPase 1a (RAB1a)	-1.43381	-0.291069									√	√	√	√		√	√			6	NO	YES
PF3D7_0817900	MAL8P1.72	high mobility group protein (HMGB2)	-2.91257	-0.294628									√	√	√	√		√	√			6	NO	YES
PF3D7_0418500	PFD0895c	Bet3 transport protein, putative (BET3p)	-0.689397	-0.295758									√	√		√		√	√	√		6	NO	YES
PF3D7_1024300	PF10_0236	conserved Plasmodium protein, unknown function	1.24938	-0.300641	√		transcribed						√		√	√		√	√	√		6	YES	YES
PF3D7_0808400	MAL8P1.121	coatomer epsilon subunit, putative	-1.29391	-0.465189									√	√		√		√	√	√		6	NO	YES
PF3D7_0306200	PFC0270w	activator of Hsp90 ATPase (AHA1)	0.396845	-0.518751									√	√	√	√		√	√			6	NO	YES
PF3D7_0213700	PFB0620w	conserved protein, unknown function	-0.063618	-0.535803									√	√		√		√	√	√		6	NO	YES
PF3D7_0422600	PFD1065c	conserved Plasmodium protein, unknown function	-0.749958	-0.551575									√	√		√		√	√	√		6	NO	YES
PF3D7_1347400	MAL13P1.236	conserved Plasmodium protein, unknown function	0.574472	-0.627818									√		√	√			√	√	√	6	NO	YES
PF3D7_0106400	PFA0315w	conserved Plasmodium protein, unknown function	0.399641	-0.686707									√	√	√	√		√	√			6	NO	YES
PF3D7_1032500	PF10_0317	DER1-like protein, putative (Der1-2)	0.612793	-0.696738									√		√	√		√	√	√		6	NO	YES
PF3D7_1002900	PF10_0033	conserved Plasmodium protein, unknown function	0.573008	-0.901351									√	√		√		√	√	√		6	NO	YES
PF3D7_0415400	PFD0745c	nonclathrin coat protein zeta2-cop-related protein, putative	1.51146	-0.969709	√		transcribed						√	√		√		√	√	√		6	YES	YES
PF3D7_1410000	PF14_0098	tetratricopeptide repeat family protein, putative	-1.69697	-1.01057									√		√	√		√	√	√		6	NO	YES
PF3D7_0423700	PFD1120c	early transcribed membrane protein 4 (ETRAMP4)	-2.72199	2.83422		√	stabilized						√		√	√	√	√	√			6	YES	YES
PF3D7_1474000	PF14_0708	probable protein, unknown function	-1.37867	1.80417		√	stabilized				√		√		√	√	√	√				6	YES	YES
PF3D7_0904200	PFI0205w	conserved Plasmodium protein, unknown function	0.130804	1.47119		√	stabilized		√				√	√	√	√		√				6	YES	YES
PF3D7_1346700	PF13_0247	6-cysteine protein (P48/45)	-0.921334	1.42261		√	stabilized		√				√		√	√		√	√			6	YES	YES
PF3D7_1466800	PF14_0636	conserved Plasmodium protein, unknown function	-1.59285	1.42121		√	stabilized		√				√		√	√		√	√			6	YES	YES
PF3D7_1477300	PF14_0744	Plasmodium exported protein, unknown function (Pfg14-744)	0.253592	1.28618		√	stabilized			√	√		√			√		√	√			6	YES	YES
PF3D7_0414500	PFD0700c	RNA binding protein, putative	0.139946	1.23929		√	stabilized		√				√	√		√		√	√			6	YES	YES
PF3D7_1467600	PF14_0644	conserved Plasmodium protein, unknown function	-0.0683335	1.18567		√	stabilized		√				√		√	√	√	√				6	YES	YES
PF3D7_1038400	PF10_0374	gametocyte-specific protein (Pf11-1)	0.535324	1.1704		√	stabilized		√				√		√	√		√	√			6	YES	YES
PF3D7_1146800	PF11_0479	conserved Plasmodium protein, unknown function	-0.270018	1.11147		√	stabilized		√				√		√	√		√	√			6	YES	YES
PF3D7_0828700	MAL8P1.12	conserved Plasmodium protein, unknown function	-0.815666	1.05147		√	stabilized							√	√	√			√	√	√	6	YES	YES
PF3D7_1241400	PFL1990c	RNA binding protein, putative	-0.381781	0.965344					√				√		√	√		√	√			6	NO	YES
PF3D7_0114000	PFA0675w	RESA-like protein with DnaJ domain, putative (GEXP06)	-0.223773	0.925883									√	√	√	√		√	√			6	NO	YES
PF3D7_0530800	PFE1540w	CPW-WPC family protein	0.46456	0.832704					√			√	√	√	√	√						6	NO	YES
PF3D7_0421700	PFD1030c	conserved Plasmodium protein, unknown function	0.833243	0.70636	√		transcribed						√	√	√	√				√	√	6	YES	YES
PF3D7_1118900	PF11_0196	conserved Plasmodium protein, unknown function	0.722241	0.69108					√				√			√			√	√	√	6	NO	YES
PF3D7_1455800	PF14_0532	LCCL domain-containing protein (CCp2)	0.674831	0.661764	√		transcribed		√			√	√		√	√			√			6	YES	YES
PF3D7_1003700	PF10_0040	conserved Plasmodium protein, unknown function	-0.466517	0.62803					√					√		√		√	√	√		6	NO	YES
PF3D7_1416400	PF14_0162	conserved Plasmodium protein, unknown function	-0.495941	0.613414									√		√	√			√	√	√	6	NO	YES
PF3D7_1102600	PF11_0038	Plasmodium exported protein, unknown function (GEXP14)	0.201184	0.606521							√		√			√	√	√	√			6	NO	YES
PF3D7_0518600	PFE0930w	WD-repeat protein, putative	-0.349006	0.594858					√				√	√	√	√			√			6	NO	YES
PF3D7_1407000	PF14_0067	LCCL domain-containing protein (CCp3)	0.332194	0.581353					√				√			√			√	√	√	6	NO	YES
PF3D7_0515600	PFE0780w	conserved Plasmodium protein, unknown function	0.416631	0.512965	√		transcribed		√				√	√	√	√			√			6	YES	YES
PF3D7_0605600	PFF0275c	nucleoside diphosphate kinase, putative	0.782147	0.508891	√		transcribed							√	√	√			√	√	√	6	YES	YES
PF3D7_0723200	MAL7P1.124	conserved Plasmodium protein, unknown function	0.450454	0.460189									√	√	√	√				√	√	6	NO	YES
PF3D7_0602000	PFF0095c	conserved Plasmodium protein, unknown function	-1.03423	0.455683					√					√	√	√		√	√			6	NO	YES
PF3D7_0417600	PFD0855c	conserved Plasmodium protein, unknown function	0.533011	0.407694	√		transcribed							√	√	√			√	√	√	6	YES	YES
PF3D7_0825100	MAL8P1.28	conserved Plasmodium protein, unknown function	1.34186	0.379001	√		transcribed		√				√	√	√	√			√			6	YES	YES
PF3D7_0215000	PFB0685c	acyl-CoA synthetase, PfACS9 (ACS9)	-0.113366	0.354193				√						√		√	√	√	√			6	NO	YES
PF3D7_0305800	PFC0260w	P-loop containing nucleoside triphospahte hydrolase, putative	1.74549	0.345302	√		transcribed		√				√	√	√	√			√			6	YES	YES
PF3D7_1010500	PF10_0102	ankyrin-repeat protein, putative	1.14025	0.307874	√		transcribed		√				√	√	√	√			√			6	YES	YES
PF3D7_0624900	PFF1200w	conserved Plasmodium protein, unknown function	0.799385	0.289604										√	√	√			√	√	√	6	NO	YES
PF3D7_1303900	MAL13P1.20	conserved Plasmodium protein, unknown function	1.36743	0.259417	√		transcribed		√				√			√			√	√	√	6	YES	YES
PF3D7_1220000	PFL0965c	conserved Plasmodium protein, unknown function	1.80284	0.256758	√		transcribed						√		√	√			√	√	√	6	YES	YES
PF3D7_1474400	PF14_0712	conserved Plasmodium protein, unknown function	0.483389	0.235438					√				√			√		√	√	√		6	NO	YES
PF3D7_1404200	PF14_0039	conserved Plasmodium protein, unknown function	0.495227	0.234123									√		√	√			√	√	√	6	NO	YES
PF3D7_1104600	PF11_0057	conserved Plasmodium protein, unknown function	0.301884	0.230129									√		√	√			√	√	√	6	NO	YES
PF3D7_0914800	PFI0725c	GINS complex subunit Psf3, putative	-2.07722	0.199836									√	√	√	√		√	√			6	NO	YES
PF3D7_0503200	PFE0155w	conserved Plasmodium protein, unknown function	-1.02113	0.175125										√	√	√		√	√	√		6	NO	YES
PF3D7_0320600	PFC0911c	conserved Plasmodium protein, unknown function	-1.83145	0.126239									√	√		√			√	√	√	6	NO	YES
PF3D7_1004500	PF10_0048	conserved Plasmodium protein, unknown function	0.450118	0.0259705									√	√		√		√	√	√		6	NO	YES
PF3D7_0316500	PFC0720w	conserved Plasmodium protein, unknown function	0.594274	0.012814										√	√	√		√	√	√		6	NO	YES
PF3D7_1006700	PF10_0067	conserved Plasmodium protein, unknown function	-0.329911	-0.124498										√	√	√		√	√	√		6	NO	YES
PF3D7_1006600	PF10_0066	thioredoxin, putative	0.982568	-0.135325									√	√	√	√		√	√			6	NO	YES
PF3D7_1466600	PF14_0634	conserved Plasmodium protein, unknown function	0.899788	-0.172548					√						√	√			√	√	√	6	NO	YES
PF3D7_0936600	PFI1770w	Plasmodium exported protein (PHISTb), unknown function (GEXP05)	-0.871818	-0.340612									√	√	√	√		√	√			6	NO	YES
PF3D7_0719000	MAL7P1.98	conserved Plasmodium protein, unknown function	1.55585	-0.496745	√		transcribed						√	√	√	√		√	√			6	YES	YES
PF3D7_0405600	PFD0275w	conserved Plasmodium membrane protein, unknown function	-0.701527	-0.741305									√	√		√		√	√	√		6	NO	YES
PF3D7_1342600	PF13_0233	myosin A (MyoA)	0.048454	1.91613		√	stabilized					√			√	√		√	√			5	YES	YES
PF3D7_0422300	PFD1050w	alpha tubulin 2	-2.44753	1.68354		√	stabilized		√				√			√		√	√			5	YES	YES
PF3D7_0913800	PFI0675w	conserved Plasmodium protein, unknown function	1.04173	1.64841	√	√	balance						√	√	√	√			√			5	YES	YES
PF3D7_0515700	PFE0785c	glideosome-associated protein 40, putative (GAP40)	-3.35285	1.50423		√	stabilized					√			√	√			√	√		5	YES	YES
PF3D7_1136900	PF11_0381	subtilisin-like protease 2 (SUB2)	-1.65721	1.49837		√	stabilized								√	√			√	√	√	5	YES	YES
PF3D7_1105100	PF11_0062	histone H2B (H2B)	-3.29965	1.39737		√	stabilized						√		√	√		√	√			5	YES	YES
PF3D7_1003600	PF10_0039	membrane skeletal protein IMC1-related (ALV5)	-3.23735	1.36595		√	stabilized	√				√		√	√	√						5	YES	YES
PF3D7_0423500	PFD1110w	glideosome associated protein with multiple membrane spans 2 (GAPM2)	-3.64042	1.29382		√	stabilized								√	√		√	√	√		5	YES	YES
PF3D7_0934800	PFI1685w	cAMP-dependent protein kinase catalytic subunit (PKAc)	-0.346474	1.19056		√	stabilized								√	√		√	√	√		5	YES	YES
PF3D7_1221400	PFL1030w	membrane skeletal protein, putative (ALV3)	-0.15797	1.11241	√	√	balance		√			√	√		√	√						5	YES	YES
PF3D7_0105300	PFA0260c	cyclase-associated protein, putative (C-CAP)	-1.21367	1.0856		√	stabilized								√	√			√	√	√	5	YES	YES
PF3D7_0808300	MAL8P1.122	ubiquitin regulatory protein, putative	-2.76348	1.05335		√	stabilized							√	√	√		√	√			5	YES	YES
PF3D7_1455000	PF14_0523	protein phosphatase, putative	-0.4162	0.971719					√				√		√	√			√			5	NO	YES
PF3D7_1409400	PF14_0092	conserved Plasmodium membrane protein, unknown function	-0.474334	0.937647		√	stabilized						√		√	√			√	√		5	YES	YES
PF3D7_1236900	PFL1785c	conserved Plasmodium protein, unknown function	-1.79109	0.905199											√	√		√	√	√		5	NO	YES
PF3D7_0920700	PFI1015w	conserved Plasmodium protein, unknown function	-1.56238	0.826393											√	√		√	√	√		5	NO	YES
PF3D7_0829600	MAL8P1.6	early transcribed membrane protein 8 (ETRAMP8)	-1.00566	0.825029									√	√	√	√			√			5	NO	YES
PF3D7_1435300	PF14_0334	NAD(P)H-dependent glutamate synthase, putative	-1.4845	0.815174											√	√			√	√	√	5	NO	YES
PF3D7_0210700	PFB0480w	syntaxin, Qa-SNARE family (SYN17)	-2.41013	0.778746									√	√		√		√	√			5	NO	YES
PF3D7_0927300	PFI1340w	fumarate hydratase, putative	-0.263003	0.709848											√	√		√	√	√		5	NO	YES
PF3D7_1127500	PF11_0286	protein disulfide isomerase, putative	-0.221569	0.702485											√	√		√	√	√		5	NO	YES
PF3D7_0621400	PFF1035w	Pf77 protein (ALV7)	-0.628222	0.694982					√			√		√	√	√						5	NO	YES
PF3D7_0918000	PFI0880c	glideosome-associated protein 50,secreted acid phosphatase (GAP50)	-0.596783	0.609067								√			√	√		√	√			5	NO	YES
PF3D7_0522400	PFE1120w	conserved Plasmodium protein, unknown function	-1.1174	0.604635										√		√			√	√	√	5	NO	YES
PF3D7_0929600	PFI1455c	conserved Plasmodium protein, unknown function	0.453264	0.596342					√				√	√	√	√						5	NO	YES
PF3D7_1474900	PF14_0717	trailer hitch homolog, putative (CITH)	-1.6678	0.572545									√		√	√		√	√			5	NO	YES
PF3D7_1339400	PF13_0216	conserved Plasmodium protein, unknown function	-2.43584	0.561797									√			√			√	√	√	5	NO	YES
PF3D7_1022500	PF10_0218	citrate synthase, mitochondrial precursor, putative	0.415267	0.549844				√								√			√	√	√	5	NO	YES
PF3D7_1006000	PF10_0061	conserved Plasmodium protein, unknown function	1.05264	0.540226	√		transcribed		√				√	√	√	√						5	YES	YES
PF3D7_0504900	PFE0240w	conserved Plasmodium protein, unknown function	-0.059625	0.520331									√	√	√	√			√			5	NO	YES
PF3D7_0909000	PFI0435c	conserved Plasmodium protein, unknown function	-0.2039	0.499435									√	√	√	√			√			5	NO	YES
PF3D7_1211000	PFL0545w	kinesin-like protein, putative	0.80913	0.49264								√			√	√				√	√	5	NO	YES
PF3D7_1430100	PF14_0280	phosphotyrosyl phosphatase activator, putative	0.180091	0.469369									√		√	√		√	√			5	NO	YES
PF3D7_0728700	MAL7P1.156	conserved Plasmodium protein, unknown function	0.827252	0.423767					√				√	√	√	√						5	NO	YES
PF3D7_0502300	PFE0115c	conserved Plasmodium protein, unknown function	1.17805	0.421239	√		transcribed		√				√	√	√	√						5	YES	YES
PF3D7_0915000	PFI0735c	type II NADH:ubiquinone oxidoreductase (NDH2)	-1.28964	0.409323											√	√			√	√	√	5	NO	YES
PF3D7_1121000	PF11_0217	zinc finger, DHHC-type, putative	-1.63768	0.385935					√			√	√		√	√						5	NO	YES
PF3D7_1326000	MAL13P1.141	conserved Plasmodium protein, unknown function	-1.71794	0.346744									√			√		√	√	√		5	NO	YES
PF3D7_0517600	PFE0880c	f-actin capping protein beta subunit, putative (CP)	0.260174	0.335946									√	√		√		√	√			5	NO	YES
PF3D7_0503400	PFE0165w	actin-depolymerizing factor 1 (ADF1)	0.005587	0.333679									√		√	√		√	√			5	NO	YES
PF3D7_1403700	PF14_0034	translocation associated membrane protein, putative (TRAM)	-0.989574	0.3103					√				√			√		√	√			5	NO	YES
PF3D7_0904700	PFI0230c	bacterial histone-like protein (HU)	-2.46013	0.307473										√	√	√		√	√			5	NO	YES
PF3D7_0919800	PFI0970c	TLD domain containing protein	-0.495788	0.306559										√	√	√		√	√			5	NO	YES
PF3D7_0816500	MAL8P1.78	small heat shock protein HSP20, putative (HSP20)	1.78245	0.302864	√		transcribed		√				√	√	√	√						5	YES	YES
PF3D7_1232300	PFL1555w	cytochrome b5, putative	0.439791	0.270234									√			√			√	√	√	5	NO	YES
PF3D7_0933200	PFI1610c	calcyclin binding protein, putative	-1.18519	0.264104									√	√		√		√	√			5	NO	YES
PF3D7_0910600	PFI0515w	SNARE protein (YKT6.1)	-1.03049	0.263919									√	√		√		√	√			5	NO	YES
PF3D7_0908300.1	PFI0400c	conserved Plasmodium membrane protein, unknown function	-0.748006	0.241832									√	√	√	√			√			5	NO	YES
PF3D7_1362000	PF13_0329	conserved Plasmodium protein, unknown function	-1.66497	0.233009									√			√		√	√	√		5	NO	YES
PF3D7_0104400	PFA0225w	4-hydroxy-3-methylbut-2-enyl diphosphate reductase (LytB)	-0.381011	0.231753										√	√	√		√	√			5	NO	YES
PF3D7_1238400	PFL1860c	conserved Plasmodium protein, unknown function	-0.400585	0.223226									√			√			√	√	√	5	NO	YES
PF3D7_0801600	PF08_0134	conserved Plasmodium protein, unknown function	-1.07419	0.210897									√	√		√		√	√			5	NO	YES
PF3D7_0420400	PFD0990w	ribosome recycling factor, putative	0.611113	0.186074									√	√		√		√	√			5	NO	YES
PF3D7_0819600	MAL8P1.62	conserved Plasmodium protein, unknown function	-0.803988	0.176591										√		√		√	√	√		5	NO	YES
PF3D7_0204200	PFB0194w	conserved Plasmodium protein, unknown function	-1.03194	0.169196				√						√		√		√	√			5	NO	YES
PF3D7_0719400	MAL7P1.102	conserved Plasmodium protein, unknown function	0.005844	0.169058										√		√		√	√	√		5	NO	YES
PF3D7_0911200	PFI0545w	conserved Plasmodium protein, unknown function	-1.3702	0.163322									√	√		√		√	√			5	NO	YES
PF3D7_1122100	PF11_0229	conserved Plasmodium protein, unknown function	-0.0053005	0.160879									√			√		√	√	√		5	NO	YES
PF3D7_1336400	MAL13P1.182	glucose-induced degradation protein 8, putative (GID8)	-0.705973	0.15533									√			√		√	√	√		5	NO	YES
PF3D7_0627000	PFF1310c	conserved Plasmodium protein, unknown function	1.99578	0.133329	√		transcribed						√	√	√	√			√			5	YES	YES
PF3D7_1002700	PF10_0031	conserved Plasmodium protein, unknown function	-1.17698	0.13114										√		√			√	√	√	5	NO	YES
PF3D7_0729200	MAL7P1.159	1-cys peroxiredoxin (AOP)	-0.172114	0.131092									√	√		√		√	√			5	NO	YES
PF3D7_1147700	PF11_0485	mitochondrial ATP synthase delta subunit, putative	-0.727577	0.110178									√			√		√	√	√		5	NO	YES
PF3D7_1025000	PF10_0244	formin 2, putative	0.197857	0.107498				√								√		√	√	√		5	NO	YES
PF3D7_0213500	PFB0610c	conserved Plasmodium protein, unknown function	-0.135082	0.102246										√	√	√		√	√			5	NO	YES
PF3D7_1202100.1	PFL0105w	conserved Plasmodium protein, unknown function	-0.194468	0.092495					√						√	√		√	√			5	NO	YES
PF3D7_1212800	PFL0630w	iron-sulfur subunit of succinate dehydrogenase	-0.607154	0.089281											√	√		√	√	√		5	NO	YES
PF3D7_1322800	MAL13P1.128	conserved Plasmodium protein, unknown function	0.767346	0.059881									√		√	√		√	√			5	NO	YES
PF3D7_1250300	PFL2415w	Hbeta58/Vps26 protein homolog, putative	-0.802205	0.055985											√	√		√	√	√		5	NO	YES
PF3D7_1011500	PF10_0112	conserved Plasmodium membrane protein, unknown function	-0.676347	0.010449									√	√	√	√			√			5	NO	YES
PF3D7_0303500	PFC0165w	spindle pole body protein, putative	0.197518	-0.0127715										√		√			√	√	√	5	NO	YES
PF3D7_0812600	PF08_0085	ubiquitin conjugating enzyme, putative	-0.312798	-0.020903									√	√		√		√	√			5	NO	YES
PF3D7_0405700	PFD0285c	lysine decarboxylase, putative	-0.673913	-0.030515										√	√	√		√	√			5	NO	YES
PF3D7_0213400	PFB0605w	protein kinase 7 (PK7)	0.589793	-0.0354285									√	√	√	√			√			5	NO	YES
PF3D7_0204900	PFB0220w	ubiE/COQ5 methyltransferase, putative	-0.966098	-0.037669									√	√		√		√	√			5	NO	YES
PF3D7_1012300	PF10_0120	ubiquinol-cytochrome c reductase complex subunit, putative	1.13376	-0.050394	√		transcribed						√		√	√		√	√			5	YES	YES
PF3D7_1366500	PF13_0349	nucleoside diphosphate kinase (NDK)	-0.530966	-0.051382									√		√	√		√	√			5	NO	YES
PF3D7_0207200	PFB0320c	iron-sulfur assembly protein, putative	0.719855	-0.054235									√	√	√	√			√			5	NO	YES
PF3D7_1406700	PF14_0064	phosphatase, putative	-0.5379	-0.0591245									√			√		√	√	√		5	NO	YES
PF3D7_1308500	MAL13P1.40	conserved Plasmodium protein, unknown function	0.593517	-0.110857											√	√			√	√	√	5	NO	YES
PF3D7_0423200	PFD1095w	BSD domain, putative	-1.18382	-0.149874									√	√	√	√			√			5	NO	YES
PF3D7_0915200	PFI0745w	conserved Plasmodium protein, unknown function	-0.547219	-0.157599									√	√		√		√	√			5	NO	YES
PF3D7_0320100	PFC0890w	SNARE protein (SEC22)	-0.300254	-0.177363									√	√		√		√	√			5	NO	YES
PF3D7_0626100	PFF1265w	oxidoreductase, short-chain dehydrogenase family, putative	-0.0117325	-0.179092									√			√			√	√	√	5	NO	YES
PF3D7_0212900	PFB0585w	Leu/Phe-tRNA protein transferase, putative	0.0628185	-0.185913											√	√		√	√	√		5	NO	YES
PF3D7_0320000	PFC0886w	conserved Plasmodium protein, unknown function	-1.27522	-0.186033									√	√	√	√			√			5	NO	YES
PF3D7_1310000	MAL13P1.47	mitochondrial ATP synthase delta subunit, putative (OSCP)	0.723114	-0.186767									√			√		√	√	√		5	NO	YES
PF3D7_0720500	MAL7P1.106	conserved Plasmodium protein, unknown function	1.27981	-0.197868	√		transcribed						√	√		√		√	√			5	YES	YES
PF3D7_1331300	MAL13P1.167	signal peptidase 21 kDa subunit (SP21)	-0.784408	-0.198775									√			√		√	√	√		5	NO	YES
PF3D7_0303700	PFC0170c	dihydrolipoamide acyltransferase, putative	-1.26252	-0.203327											√	√		√	√	√		5	NO	YES
PF3D7_0722700	PF07_0093	conserved Plasmodium protein, unknown function	-1.17207	-0.210352									√			√			√	√	√	5	NO	YES
PF3D7_1313000	MAL13P1.64	ubiquitin-like protein nedd8 homologue, putative (Nedd8)	-0.185974	-0.22807									√			√		√	√	√		5	NO	YES
PF3D7_0512000	PFE0595w	prefoldin subunit, putative	-0.572908	-0.250867									√	√		√		√	√			5	NO	YES
PF3D7_0528700	PFE1430c	peptidyl-prolyl cis-trans isomerase (CYP23)	-0.747853	-0.26182									√	√		√		√	√			5	NO	YES
PF3D7_1008800	PF10_0085	small subunit rRNA processing protein, putative	-0.116647	-0.271718											√	√		√	√	√		5	NO	YES
PF3D7_1465000	PF14_0617	conserved Plasmodium protein, unknown function	1.29938	-0.27454	√		transcribed						√			√		√	√	√		5	YES	YES
PF3D7_0626600	PFF1290c	conserved Plasmodium protein, unknown function	1.17267	-0.296307	√		transcribed						√	√		√		√	√			5	YES	YES
PF3D7_1436900	PF14_0349	histidine triad protein, putative	0.0332425	-0.300427									√			√		√	√	√		5	NO	YES
PF3D7_1019900	PF10_0193	autophagy-related protein 8, putative (ATG8)	0.646583	-0.301643									√		√	√		√	√			5	NO	YES
PF3D7_0916500	PFI0810c	apicoplast Ufd1 precursor (UFD1)	-1.15598	-0.323648									√	√		√		√	√			5	NO	YES
PF3D7_0721400	MAL7P1.114	P36-like protein homologue, putative	1.15975	-0.359802	√		transcribed						√	√		√		√	√			5	YES	YES
PF3D7_0602100	PFF0100w	ATP-dependent RNA helicase, putative	-0.0869425	-0.36087											√	√		√	√	√		5	NO	YES
PF3D7_0804500	MAL8P1.139	conserved Plasmodium membrane protein, unknown function	-0.692517	-0.36421										√		√			√	√	√	5	NO	YES
PF3D7_0829200	PF08_0006	prohibitin, putative	0.957429	-0.369766									√	√		√		√	√			5	NO	YES
PF3D7_0512600	PFE0625w	Rab GTPase 1b (Rab1b)	-0.665736	-0.375585									√	√		√		√	√			5	NO	YES
PF3D7_0312300	PFC0520w	26S proteasome regulatory subunit S14, putative	-1.2293	-0.376672									√	√		√		√	√			5	NO	YES
PF3D7_0303600	PFC0166w	plasmoredoxin (Plrx)	0.73292	-0.377492									√	√		√		√	√			5	NO	YES
PF3D7_1442000	PF14_0399	ADP-ribosylation factor, putative	-0.0610105	-0.383682									√		√	√		√	√			5	NO	YES
PF3D7_0108800	PFA0435w	conserved Plasmodium protein, unknown function	-0.308643	-0.392328									√	√		√		√	√			5	NO	YES
PF3D7_0709500	PF07_0039	conserved Plasmodium protein, unknown function	-0.963756	-0.402595									√	√		√		√	√			5	NO	YES
PF3D7_0319900	PFC0885c	conserved Plasmodium protein, unknown function	-0.154479	-0.404589										√		√		√	√	√		5	NO	YES
PF3D7_0824600	MAL8P1.31	anamorsin related protein, putative	-1.20042	-0.412839									√	√		√		√	√			5	NO	YES
PF3D7_0317000	PFC0745c	proteasome component C8, putative	-0.8586	-0.415085									√	√		√		√	√			5	NO	YES
PF3D7_1306200	PF13_0032	conserved Plasmodium protein, unknown function	0.393966	-0.423473											√	√		√	√	√		5	NO	YES
PF3D7_0306300	PFC0271c	glutaredoxin 1 (GRX1)	-1.78789	-0.425915									√	√		√		√	√			5	NO	YES
PF3D7_1333000	PF13_0180	20 kDa chaperonin (CPN20)	0.466357	-0.440434									√			√		√	√	√		5	NO	YES
PF3D7_1030000	PF10_0293	transcription factor, putative	-0.528244	-0.444353									√			√			√	√	√	5	NO	YES
PF3D7_0526900	PFE1340w	conserved Plasmodium protein, unknown function	-1.42254	-0.447251										√		√		√	√	√		5	NO	YES
PF3D7_0211200	PFB0500c	Rab GTPase 5a (RAB5a)	0.41166	-0.453795									√	√		√		√	√			5	NO	YES
PF3D7_0103900	PFA0195w	parasite-infected erythrocyte surface protein (PIEPS15)	0.433157	-0.495531										√		√		√	√	√		5	NO	YES
PF3D7_0104500	PFA0230c	conserved Plasmodium protein, unknown function	-0.430255	-0.502444									√	√		√		√	√			5	NO	YES
PF3D7_1209200	PFL0460w	U6 snRNA-associated Sm-like protein LSm7, putative (LSM7)	0.967187	-0.572636									√			√			√	√	√	5	NO	YES
PF3D7_1215300	PFL0740c	10 kDa chaperonin (CPN10)	-0.390636	-0.602011									√		√	√		√	√			5	NO	YES
PF3D7_0713700	MAL7P1.67	conserved Plasmodium protein, unknown function	-1.88238	-0.635435									√	√		√		√	√			5	NO	YES
PF3D7_0323800	PFC1065w	conserved Plasmodium protein, unknown function	-1.16431	-0.640466										√		√		√	√	√		5	NO	YES
PF3D7_1127100	PF11_0282	deoxyuridine 5'-triphosphate nucleotidohydrolase (dUTPase)	1.38261	-0.651665	√		transcribed						√		√	√		√	√			5	YES	YES
PF3D7_0726400	MAL7P1.146	conserved Plasmodium membrane protein, unknown function	-0.0232765	-0.660633										√		√			√	√	√	5	NO	YES
PF3D7_0928900	PFI1420w	guanylate kinase (GK)	-1.0253	-0.663221									√	√		√		√	√			5	NO	YES
PF3D7_0319200	PFC0850c	endonuclease/exonuclease/phosphatase family protein, putative	0.780263	-0.667645										√		√		√	√	√		5	NO	YES
PF3D7_0314400	PFC0595c	serine/threonine protein phosphatase, putative	-0.836119	-0.696256									√			√		√	√	√		5	NO	YES
PF3D7_0529500	PFE1470w	cell cycle regulator protein, putative	-1.51006	-0.700338									√			√		√	√	√		5	NO	YES
PF3D7_0412200	PFD0605c	conserved Plasmodium protein, unknown function	-0.897143	-0.709909									√	√		√		√	√			5	NO	YES
PF3D7_0715500	MAL7P1.75	mitochondrial ATP synthase F1, epsilon subunit, putative	2.12681	-0.716806	√		transcribed						√	√	√	√			√			5	YES	YES
PF3D7_1107000	PF11_0524	U6 snRNA-associated Sm-like protein LSm4, putative (LSM4)	-0.725714	-0.723399									√			√		√	√	√		5	NO	YES
PF3D7_1203200	PFL0160w	signal recognition particle SRP14 (SRP14)	-1.35843	-0.742204									√		√	√		√	√			5	NO	YES
PF3D7_1364800	PF13_0341	DNA-directed RNA polymerase 2, putative	-0.640176	-0.806503									√			√		√	√	√		5	NO	YES
PF3D7_0208800	PFB0395w	conserved Plasmodium protein, unknown function	0.052245	-0.836019									√	√		√		√	√			5	NO	YES
PF3D7_0919100	PFI0935w	DnaJ protein, putative	0.583684	-0.851524										√		√		√	√	√		5	NO	YES
PF3D7_0512700	PFE0630c	orotate phosphoribosyltransferase (OPRT)	0.495378	-0.878441										√		√		√	√	√		5	NO	YES
PF3D7_0512200	PFE0605c	glutathione synthetase (GS)	-0.898613	-0.891721										√		√		√	√	√		5	NO	YES
PF3D7_1216300	PFL0785c	signal recognition particle SRP19 (SRP19)	0.033906	-0.900246									√			√		√	√	√		5	NO	YES
PF3D7_1208600	PFL0430w	tim10 homologue, putative	1.79144	-0.918475	√		transcribed						√		√	√		√	√			5	YES	YES
PF3D7_0606900	PFF0340c	glutaredoxin-like protein (GLP2)	0.285427	-0.991977									√	√		√		√	√			5	NO	YES
PF3D7_0306700	PFC0282w	conserved Plasmodium protein, unknown function	1.62349	-1.00826	√		transcribed						√	√		√		√	√			5	YES	YES
PF3D7_0822300	MAL8P1.48	small nuclear ribonucleoprotein G, putative (SNRPG)	-1.36187	-1.23306									√	√		√		√	√			5	NO	YES
PF3D7_1435400	PF14_0335	conserved protein, unknown function	0.332862	-1.3079									√			√		√	√	√		5	NO	YES
PF3D7_0516800	PFE0840c	transcription factor with AP2 domain(s) (ApiAP2)	n.d.	n.d.										√	√	√		√	√			5	NO	YES
PF3D7_1302100	PF13_0011	gamete antigen 27/25 (Pfg27)	-1.61604	3.70242		√	stabilized				√		√			√		√	√			5	YES	YES
PF3D7_1473700	PF14_0706	conserved Plasmodium protein, unknown function	-1.22591	1.73626		√	stabilized								√	√	√	√	√			5	YES	YES
PF3D7_1461800	PF14_0588	conserved Plasmodium protein, unknown function	-1.59455	1.65185		√	stabilized				√		√		√	√		√				5	YES	YES
PF3D7_1319800	MAL13P1.106	probable protein, unknown function	-1.63994	1.61923		√	stabilized						√		√	√		√	√			5	YES	YES
PF3D7_1476500	PF14_0735	probable protein, unknown function	-1.79975	1.45644		√	stabilized				√		√		√	√		√				5	YES	YES
PF3D7_0724900	PF07_0104	kinesin-like protein, putative	-0.671963	1.38444		√	stabilized		√			√		√	√	√						5	YES	YES
PF3D7_1372100	MAL13P1.475	Plasmodium exported protein (PHISTb), unknown function (GEXP04)	-0.13257	1.25919		√	stabilized						√		√	√	√	√				5	YES	YES
PF3D7_0315600	PFC0680w	conserved Plasmodium protein, unknown function	0.235522	1.20938		√	stabilized				√				√	√	√	√				5	YES	YES
PF3D7_1102500	PF11_0037	Plasmodium exported protein (PHISTb), unknown function (GEXP02)	-0.30441	1.1944		√	stabilized								√	√	√	√	√			5	YES	YES
PF3D7_0504500	PFE0220w	conserved Plasmodium protein, unknown function	1.38336	1.10317	√	√	balance		√				√	√	√	√						5	YES	YES
PF3D7_0314700	PFC0610c	zinc finger protein, putative	-0.488964	1.06863		√	stabilized						√	√		√		√	√			5	YES	YES
PF3D7_1438800	PF14_0367	conserved Plasmodium protein, unknown function	0.588558	1.00743		√	stabilized		√				√		√	√			√			5	YES	YES
PF3D7_0922300	PFI1095w	conserved Plasmodium protein, unknown function	0.267826	0.931121					√				√	√	√	√						5	NO	YES
PF3D7_0110000	PFA0490w	conserved Plasmodium protein, unknown function	-0.625656	0.927003					√				√	√	√	√						5	NO	YES
PF3D7_0930000	PFI1465w	procollagen lysine 5-dioxygenase, putative	1.02475	0.926716	√		transcribed		√				√	√	√	√						5	YES	YES
PF3D7_1206300	PFL0315c	conserved Plasmodium protein, unknown function	-0.534226	0.910148				√							√	√				√	√	5	NO	YES
PF3D7_1475500	PF14_0723	LCCL domain-containing protein (CCp1)	0.540663	0.881367	√		transcribed						√		√	√		√	√			5	YES	YES
PF3D7_0422900	PFD1080w	conserved Plasmodium protein, unknown function	-0.650983	0.877031									√	√	√	√			√			5	NO	YES
PF3D7_1362600	MAL13P1.312	conserved Plasmodium protein, unknown function	0.673689	0.857062					√			√	√		√	√						5	NO	YES
PF3D7_0320200	PFC0895w	CPW-WPC family protein	0.673376	0.847957					√			√		√	√	√						5	NO	YES
PF3D7_1316000	MAL13P1.84	protein kinase, putative	0.83706	0.843241					√			√	√		√	√						5	NO	YES
PF3D7_0418800	PFD0910w	conserved Plasmodium protein, unknown function	1.05646	0.840264	√		transcribed		√				√	√	√	√						5	YES	YES
PF3D7_1413000	PF14_0129	conserved Plasmodium protein, unknown function	-0.0889275	0.821605											√	√			√	√	√	5	NO	YES
PF3D7_1426300	PF14_0243a	dynein-associated protein, putative	-0.408305	0.815734					√						√	√				√	√	5	NO	YES
PF3D7_1210200	PFL0510c	zinc finger protein, putative	1.03285	0.80713	√		transcribed		√			√	√		√	√						5	YES	YES
PF3D7_1466200	PF14_0631	conserved Plasmodium protein, unknown function	-1.42219	0.785087									√			√	√	√	√			5	NO	YES
PF3D7_0801300	PF08_0136b	von Willebrand factor A-domain related protein (WARP)	1.26212	0.775095	√		transcribed					√	√	√	√	√						5	YES	YES
PF3D7_1429300	PF14_0272	CPW-WPC family protein	-0.247845	0.770636					√			√	√		√	√						5	NO	YES
PF3D7_0111000	PFA0535c	kinesin, putative	-0.966804	0.770118											√	√		√	√	√		5	NO	YES
PF3D7_1306500	MAL13P1.32	MORN repeat protein, putative	0.576441	0.727302									√			√			√	√	√	5	NO	YES
PF3D7_0816800	MAL8P1.76	meiotic recombination protein dmc1-like protein	1.55844	0.725934	√		transcribed		√				√	√	√	√						5	YES	YES
PF3D7_0825800	MAL8P1.25	conserved Plasmodium protein, unknown function	0.453002	0.719679					√				√	√	√	√						5	NO	YES
PF3D7_0514500	PFE0725c	conserved Plasmodium membrane protein, unknown function	0.503857	0.714881					√				√	√	√	√						5	NO	YES
PF3D7_0216000	PFB0730w	DEAD/DEAH box helicase, putative	-0.104409	0.703543					√					√	√	√			√			5	NO	YES
PF3D7_0925000	PFI1225w	conserved Plasmodium protein, unknown function	0.437807	0.680101									√	√	√	√			√			5	NO	YES
PF3D7_1440600	PF14_0385	conserved Plasmodium protein, unknown function	0.570721	0.659801									√			√			√	√	√	5	NO	YES
PF3D7_1470500	PF14_0672	phosphodiesterase delta, putative (PDEdelta)	-0.40219	0.621825					√			√			√	√			√			5	NO	YES
PF3D7_0925100	PFI1230c	conserved Plasmodium protein, unknown function	0.560719	0.617484					√				√	√	√	√						5	NO	YES
PF3D7_0411700	PFD0580c	conserved Plasmodium protein, unknown function	0.941733	0.615515					√				√	√	√	√						5	NO	YES
PF3D7_0715100	PF07_0060	conserved Plasmodium protein, unknown function	1.32837	0.613646	√		transcribed		√				√	√	√	√						5	YES	YES
PF3D7_0517500	PFE0875c	conserved Plasmodium protein, unknown function	-0.0377175	0.613519					√				√	√		√			√			5	NO	YES
PF3D7_0722800	PF07_0094	conserved Plasmodium protein, unknown function	1.01581	0.593943	√		transcribed		√				√	√	√	√						5	YES	YES
PF3D7_0417700	PFD0860w	conserved Plasmodium protein, unknown function	-0.878892	0.59129					√				√	√	√	√						5	NO	YES
PF3D7_0624300	PFF1170w	conserved Plasmodium protein, unknown function	-0.038387	0.56676									√	√	√	√			√			5	NO	YES
PF3D7_0603900	PFF0190c	conserved Plasmodium protein, unknown function	1.16217	0.564115	√		transcribed						√	√	√	√			√			5	YES	YES
PF3D7_0522900	PFE1145w	zinc finger protein, putative	-0.0569505	0.560601	√		transcribed					√		√	√	√			√			5	YES	YES
PF3D7_0517800	PFE0890c	apicortin, putative	1.66707	0.550064	√		transcribed		√				√	√	√	√						5	YES	YES
PF3D7_1207000	PFL0350c	conserved Plasmodium protein, unknown function	-0.952547	0.546778											√	√			√	√	√	5	NO	YES
PF3D7_1103500	PF11_0045	CPW-WPC family protein	1.24697	0.537976	√		transcribed		√			√	√		√	√						5	YES	YES
PF3D7_0516500	PFE0825w	metabolite/drug transporter, putative	0.415809	0.537011					√				√	√	√	√						5	NO	YES
PF3D7_0923700	PFI1165c	conserved Plasmodium protein, unknown function	0.951335	0.536943	√		transcribed		√				√	√		√			√			5	YES	YES
PF3D7_1126800	PF11_0279	conserved Plasmodium protein, unknown function	0.699769	0.510986					√				√		√	√			√			5	NO	YES
PF3D7_0804700	PF08_0122	conserved Plasmodium protein, unknown function	0.638553	0.507837					√				√	√	√	√						5	NO	YES
PF3D7_0828000	MAL8P1.16	rhomboid protease ROM3 (ROM3)	0.520438	0.507443					√				√	√	√	√						5	NO	YES
PF3D7_0905300	PFI0260c	dynein heavy chain, putative	1.2031	0.507385	√		transcribed							√		√			√	√	√	5	YES	YES
PF3D7_1362700	MAL13P1.313	conserved Plasmodium protein, unknown function	-0.71307	0.491044									√		√	√	√	√				5	NO	YES
PF3D7_1472500	PF14_0693	conserved Plasmodium protein, unknown function	-0.844204	0.489385					√				√		√	√			√			5	NO	YES
PF3D7_0731800	MAL7P1.178	alpha/beta hydrolase, putative (GEXP08)	-1.17345	0.487281										√	√	√		√	√			5	NO	YES
PF3D7_1348800	MAL13P1.246	E1-E2 ATPase, putative	1.20791	0.472154	√		transcribed								√	√			√	√	√	5	YES	YES
PF3D7_1030900	PF10_0302	28 kDa ookinete surface protein (Pfs28)	0.399317	0.47139	√		transcribed		√			√	√		√	√						5	YES	YES
PF3D7_1325200	PF13_0144	oxidoreductase, putative	0.588129	0.467458					√				√			√		√	√			5	NO	YES
PF3D7_1027900	PF10_0273	DHHC-type zinc finger protein, putative	0.141299	0.458723					√			√	√		√	√						5	NO	YES
PF3D7_1248400	PFL2320w	conserved Plasmodium protein, unknown function	-0.332915	0.454736					√				√		√	√		√				5	NO	YES
PF3D7_1141900	PF11_0431	inner membrane complex protein 1b, putative (IMC1b)	-0.17078	0.450041					√			√	√		√	√						5	NO	YES
PF3D7_1451600	PF14_0491	LCCL-like protein (FNPA)	0.316967	0.44052	√		transcribed		√			√			√	√			√			5	YES	YES
PF3D7_0827200	PF08_0017	conserved Plasmodium protein, unknown function	2.1253	0.428411	√		transcribed		√				√	√	√	√						5	YES	YES
PF3D7_0816900	PF08_0062	adenylate kinase 2 (AK2)	1.63876	0.415757	√		transcribed						√	√	√	√			√			5	YES	YES
PF3D7_0208900	PFB0400w	6-cysteine protein (P230p)	2.09962	0.411497	√		transcribed		√							√			√	√	√	5	YES	YES
PF3D7_0805000	MAL8P1.138	alpha/beta hydrolase, putative	-0.601614	0.400465									√	√		√		√	√			5	NO	YES
PF3D7_0528900	PFE1440c	conserved Plasmodium protein, unknown function	0.725442	0.386988									√	√	√	√			√			5	NO	YES
PF3D7_0920300	PFI0995w	conserved Plasmodium protein, unknown function	0.524643	0.368323					√				√	√	√	√						5	NO	YES
PF3D7_0708600	PF07_0031	heat shock protein 86 family protein	1.06912	0.358568	√		transcribed		√				√	√	√	√						5	YES	YES
PF3D7_1023600	PF10_0229	conserved Plasmodium protein, unknown function	0.830479	0.33904					√				√			√				√	√	5	NO	YES
PF3D7_0903800	PFI0185w	LCCL domain-containing protein (CCp4)	1.32285	0.335704	√		transcribed		√				√	√	√	√						5	YES	YES
PF3D7_0827400	PF08_0015	conserved Plasmodium protein, unknown function	-0.0854565	0.323957					√				√	√	√	√						5	NO	YES
PF3D7_1403000	PF14_0030	conserved Plasmodium protein, unknown function	0.880011	0.322339					√				√		√	√			√			5	NO	YES
PF3D7_1311100	PF13_0060	conserved Plasmodium protein, unknown function	1.0112	0.318013	√		transcribed								√	√			√	√	√	5	YES	YES
PF3D7_0513600	PFE0675c	deoxyribodipyrimidine photolyase (photoreactivating enzyme, DNA photolyase), putative	-0.179391	0.309066										√	√	√		√	√			5	NO	YES
PF3D7_0605400	PFF0265c	calcium-binding protein, putative	-0.269393	0.302243										√		√			√	√	√	5	NO	YES
PF3D7_1403400	PF14_0032	conserved Plasmodium protein, unknown function	-0.228574	0.289308									√			√			√	√	√	5	NO	YES
PF3D7_1227500	PFL1330c	cyclin (CYC2)	-0.290408	0.285021											√	√			√	√	√	5	NO	YES
PF3D7_0109900.1	PFA0485w-a	phosphatidate cytidylyltransferase, putative	-0.142875	0.282311									√	√	√	√			√			5	NO	YES
PF3D7_0311600	PFC0490w	conserved Plasmodium protein, unknown function	-0.376084	0.269785									√	√	√	√			√			5	NO	YES
PF3D7_1137600	PF11_0388	conserved Plasmodium protein, unknown function	2.18654	0.269444	√		transcribed		√							√			√	√	√	5	YES	YES
PF3D7_0318400	PFC0815c	conserved Plasmodium protein, unknown function	0.58914	0.268019									√	√	√	√			√			5	NO	YES
PF3D7_1112900	PF11_0135	conserved Plasmodium protein, unknown function	-0.766	0.261026	√		transcribed						√			√			√	√	√	5	YES	YES
PF3D7_0933500	PFI1620c	conserved Plasmodium protein, unknown function	-1.1163	0.25207										√		√		√	√	√		5	NO	YES
PF3D7_0205000	PFB0225c	conserved Plasmodium protein, unknown function	0.452716	0.246758					√				√	√	√	√						5	NO	YES
PF3D7_0905600	PFI0275w	conserved Plasmodium protein, unknown function	1.55326	0.244741	√		transcribed							√		√			√	√	√	5	YES	YES
PF3D7_0514000	PFE0700c	tubulin-tyrosine ligase, putative (TTL)	0.518411	0.234075					√					√	√	√			√			5	NO	YES
PF3D7_0111400	PFA0550w	conserved Plasmodium protein, unknown function (GEXP19)	0.223218	0.229866										√	√	√		√	√			5	NO	YES
PF3D7_0604000	PFF0195c	conserved Plasmodium protein, unknown function	0.631308	0.218874										√		√		√	√	√		5	NO	YES
PF3D7_0915800	PFI0775w	glycolipid transfer protein, putative	0.578586	0.212651					√				√	√	√	√						5	NO	YES
PF3D7_1023700	PF10_0230	conserved Plasmodium protein, unknown function	1.63918	0.208578	√		transcribed		√							√			√	√	√	5	YES	YES
PF3D7_0307900	PFC0335c	conserved Plasmodium protein, unknown function	0.855872	0.205273										√		√			√	√	√	5	NO	YES
PF3D7_1319700	MAL13P1.105	ser/thr protein phosphatase 2A regulatory subunit A, putative	0.413405	0.203729					√				√			√		√	√			5	NO	YES
PF3D7_0819800	MAL8P1.60	conserved Plasmodium protein, unknown function	0.113124	0.200623										√		√			√	√	√	5	NO	YES
PF3D7_0314100.1	PFC0582c-a	vesicle transport v-SNARE protein, putative	-0.821857	0.186418									√	√		√		√	√			5	NO	YES
PF3D7_0626500	PFF1285w	conserved Plasmodium protein, unknown function	1.16084	0.176977	√		transcribed							√		√			√	√	√	5	YES	YES
PF3D7_1242400	PFL2040w	conserved Plasmodium protein, unknown function	-0.446995	0.162385											√	√			√	√	√	5	NO	YES
PF3D7_0623400	PFF1125c	RNA-binding protein mei2 homologue, putative	0.741124	0.160606								√	√	√	√	√						5	NO	YES
PF3D7_1452800	PF14_0503	conserved Plasmodium protein, unknown function	1.3719	0.140155	√		transcribed						√			√			√	√	√	5	YES	YES
PF3D7_1131200	PF11_0322	conserved Plasmodium protein, unknown function	-0.137457	0.133997					√				√		√	√			√			5	NO	YES
PF3D7_1445000	PF14_0427	conserved Plasmodium protein, unknown function	0.023	0.123889									√		√	√		√	√			5	NO	YES
PF3D7_0936400	PFI1760w	ring-exported protein 4 (REX4)	-1.2902	0.100951									√	√	√	√		√				5	NO	YES
PF3D7_0703800	PF07_0014	conserved Plasmodium protein, unknown function	1.2258	0.0986135	√		transcribed							√		√			√	√	√	5	YES	YES
PF3D7_0415600	PFD0755c	adenylate kinase (GAK)	0.750237	0.096456									√	√	√	√			√			5	NO	YES
PF3D7_0113400	PFA0640c	Plasmodium exported protein, unknown function	-0.32499	0.086984									√	√	√	√	√					5	NO	YES
PF3D7_0310000	PFC0416w	conserved Plasmodium protein, unknown function	-1.00503	0.085321									√	√	√	√			√			5	NO	YES
PF3D7_1235800	PFL1730c	conserved Plasmodium protein, unknown function	1.1777	0.078736	√		transcribed		√							√			√	√	√	5	YES	YES
PF3D7_0419000	PFD0920w	conserved Plasmodium protein, unknown function	0.821508	0.048188									√	√	√	√			√			5	NO	YES
PF3D7_0315700	PFC0685w	conserved Plasmodium membrane protein, unknown function	1.60721	0.0327075	√		transcribed		√				√	√	√	√						5	YES	YES
PF3D7_0203800	PFB0177c	conserved Plasmodium protein, unknown function	0.991452	-0.014344					√				√	√	√	√						5	NO	YES
PF3D7_1228300	PFL1370w	NIMA related kinase 1 (NEK1)	-0.976552	-0.0352175											√	√			√	√	√	5	NO	YES
PF3D7_0204000	PFB0185w	conserved Plasmodium protein, unknown function	0.420448	-0.0454835										√		√			√	√	√	5	NO	YES
PF3D7_1432400	PF14_0305	leucine-rich repeat protein (LRR5)	0.204889	-0.071576									√			√			√	√	√	5	NO	YES
PF3D7_0322600	PFC1010w	conserved Plasmodium protein, unknown function	1.50189	-0.073292	√		transcribed							√		√			√	√	√	5	YES	YES
PF3D7_1107400	PF11_0087	Rad51 homolog (RAD51)	-1.07388	-0.077253								√			√	√		√	√			5	NO	YES
PF3D7_1215800	PFL0760w	conserved Plasmodium protein, unknown function	1.66109	-0.102089	√		transcribed						√			√			√	√	√	5	YES	YES
PF3D7_0523600	PFE1175w	conserved Plasmodium protein, unknown function	-1.22527	-0.164317									√			√			√	√	√	5	NO	YES
PF3D7_0111300	PFA0545c	replication factor c protein, putative	-0.411251	-0.171834										√		√			√	√	√	5	NO	YES
PF3D7_0824200	MAL8P1.34	conserved Plasmodium protein, unknown function	0.072248	-0.173236										√		√			√	√	√	5	NO	YES
PF3D7_0219100	PFB0880w	conserved protein, unknown function	1.16937	-0.179017	√		transcribed		√					√	√	√			√			5	YES	YES
PF3D7_0630000	PFF1455c	CPW-WPC family protein	-0.828216	-0.215813								√	√	√	√	√						5	NO	YES
PF3D7_1304300	MAL13P1.24	conserved Plasmodium protein, unknown function	-1.5409	-0.223596									√		√	√		√	√			5	NO	YES
PF3D7_1348400	PF13_0254	conserved Plasmodium membrane protein, unknown function	-0.152738	-0.235707					√				√		√	√			√			5	NO	YES
PF3D7_1304400	PF13_0020	conserved Plasmodium protein, unknown function	0.097872	-0.257513											√	√		√	√	√		5	NO	YES
PF3D7_0509200	PFE0455w	leucine-rich repeat protein (LRR2)	-0.467488	-0.259873									√	√	√	√			√			5	NO	YES
PF3D7_0508400	PFE0415w	transcription factor IIb, putative	0.996578	-0.264586											√	√			√	√	√	5	NO	YES
PF3D7_0821200	PF08_0043	conserved Plasmodium protein, unknown function	0.006227	-0.310962									√	√		√		√	√			5	NO	YES
PF3D7_0822100	PF08_0037	RNA polymerase II mediator complex protein MED7, putative	0.372402	-0.31562									√	√		√		√	√			5	NO	YES
PF3D7_1010900	PF10_0106	conserved Plasmodium protein, unknown function	0.586369	-0.319561									√	√	√	√		√				5	NO	YES
PF3D7_1215100	PFL0730w	conserved Plasmodium protein, unknown function	0.749758	-0.322308											√	√		√	√	√		5	NO	YES
PF3D7_0308000	PFC0340w	DNA polymerase epsilon subunit b, putative	1.18614	-0.3745	√		transcribed							√		√		√	√	√		5	YES	YES
PF3D7_0322800	PFC1016w	conserved Plasmodium protein, unknown function	1.14274	-0.384023	√		transcribed							√		√			√	√	√	5	YES	YES
PF3D7_1421000	PF14_0775	conserved Plasmodium protein, unknown function	-1.33521	-0.390205									√		√	√		√	√			5	NO	YES
PF3D7_0407200	PFD0355c	peptidyl-tRNA hydrolase PTH2, putative	-0.780939	-0.402198										√	√	√		√	√			5	NO	YES
PF3D7_1330800	PF13_0165	conserved Plasmodium protein, unknown function	0.676195	-0.406733											√	√		√	√	√		5	NO	YES
PF3D7_1324400	PF13_0138	MSF1-like protein, putative	-0.067237	-0.570028									√		√	√		√	√			5	NO	YES
PF3D7_0506100	PFE0300c	60S ribosomal subunit protein L24-2, putative	0.457166	-0.789476										√	√	√		√	√			5	NO	YES
PF3D7_0921000.2	PFI1030c-a	ubiquitin conjugating enzyme, putative	1.82623	-0.841275	√		transcribed						√	√		√		√	√			5	YES	YES
PF3D7_0113900	PFA0670c	Plasmodium exported protein (hyp8), unknown function (GEXP10)	-0.195698	-0.860132										√	√	√		√	√			5	NO	YES
PF3D7_0304400	PFC0200w-a	60S ribosomal protein L44, putative	-2.1301	-0.9712									√	√		√				√	√	5	NO	YES
PF3D7_1367600	MAL13P1.341	ribosome biogenesis protein MRT4, putative	-0.395084	-0.980299									√		√	√		√	√			5	NO	YES
PF3D7_0911100	PFI0540w	conserved Plasmodium protein, unknown function	0.560193	2.03434		√	stabilized							√	√	√			√			4	YES	YES
PF3D7_0828800	PF08_0008	GPI-anchored micronemal antigen (GAMA)	-2.14157	1.99923		√	stabilized							√	√	√			√			4	YES	YES
PF3D7_0929400	PFI1445w	high molecular weight rhoptry protein 2 (RhopH2)	-3.94615	1.98226		√	stabilized								√	√		√	√			4	YES	YES
PF3D7_0610400	PFF0510w	histone H3 (H3)	-5.01908	1.90044		√	stabilized								√	√		√	√			4	YES	YES
PF3D7_1310700	PF13_0058	conserved Plasmodium protein, unknown function	0.535386	1.88527		√	stabilized	√					√		√	√						4	YES	YES
PF3D7_0525800	PFE1285w	membrane skeletal protein IMC1-related	0.639973	1.77962		√	stabilized	√				√			√	√						4	YES	YES
PF3D7_0408000	PFD0395c	conserved Plasmodium protein, unknown function	-1.48813	1.73177		√	stabilized					√	√	√		√						4	YES	YES
PF3D7_1361800	MAL13P1.308	conserved Plasmodium protein, unknown function	-3.99785	1.68682		√	stabilized								√	√		√	√			4	YES	YES
PF3D7_0304100	PFC0185w	membrane skeletal protein IMC1-related (ALV2)	-0.872235	1.55849		√	stabilized					√		√	√	√						4	YES	YES
PF3D7_1007200	PF10_0071	rhoGAP GTPase, putative	-2.10999	1.49803		√	stabilized								√	√		√	√			4	YES	YES
PF3D7_1307500	PF13_0039	conserved Plasmodium protein, unknown function	-1.56313	1.43023		√	stabilized	√					√		√	√						4	YES	YES
PF3D7_1143100	PF11_0442	transcription factor with AP2 domain(s) (AP2-O)	-1.47035	1.42454		√	stabilized	√				√			√	√						4	YES	YES
PF3D7_0805200	PF08_0119	conserved Plasmodium protein, unknown function	0.0904785	1.36322		√	stabilized						√	√	√	√						4	YES	YES
PF3D7_1223100	PFL1110c	cAMP-dependent protein kinase regulatory subunit (PKAr)	-2.27992	1.35359		√	stabilized								√	√		√	√			4	YES	YES
PF3D7_0617800	PFF0860c	histone H2A (H2A)	-2.43666	1.33587		√	stabilized								√	√		√	√			4	YES	YES
PF3D7_0730400	PF07_0127	conserved Plasmodium protein, unknown function	-2.12424	1.27422		√	stabilized						√	√		√			√			4	YES	YES
PF3D7_0802800	PF08_0129	serine/threonine protein phosphatase, putative	-1.6357	1.22594		√	stabilized								√	√		√	√			4	YES	YES
PF3D7_1406800	PF14_0065	glideosome associated protein with multiple membrane spans 3 (GAPM3)	-4.11742	1.18116		√	stabilized						√		√	√			√			4	YES	YES
PF3D7_1105000	PF11_0061	histone H4 (H4)	-1.81285	1.13644		√	stabilized								√	√		√	√			4	YES	YES
PF3D7_0729900	MAL7P1.162	dynein heavy chain, putative	-0.55669	1.10403		√	stabilized		√					√		√			√			4	YES	YES
PF3D7_0303200	PFC0150w	HAD superfamily protein, putative	-1.19932	1.09547		√	stabilized									√		√	√	√		4	YES	YES
PF3D7_0811600	PF08_0091	conserved Plasmodium protein, unknown function	-3.51093	1.05962		√	stabilized									√		√	√	√		4	YES	YES
PF3D7_1246200	PFL2215w	actin I (ACT1)	-0.99422	1.05764		√	stabilized								√	√		√	√			4	YES	YES
PF3D7_0914100	PFI0690c	conserved Plasmodium protein, unknown function	-0.91097	1.04446		√	stabilized	√				√			√	√						4	YES	YES
PF3D7_1028600	PF10_0280	conserved Plasmodium protein, unknown function	-2.05545	1.01251		√	stabilized						√		√	√			√			4	YES	YES
PF3D7_0217500	PFB0815w	calcium dependent protein kinase 1 (CDPK1)	-1.37525	1.00013		√	stabilized								√	√		√	√			4	YES	YES
PF3D7_1131500	PF11_0325	conserved Plasmodium protein, unknown function	0.149103	0.991486					√				√		√	√						4	NO	YES
PF3D7_0828900	PF08_0007	conserved Plasmodium protein, unknown function	-0.958323	0.987812										√	√	√			√			4	NO	YES
PF3D7_0932000	PFI1555w	conserved Plasmodium protein, unknown function	-0.853036	0.98271									√	√	√	√						4	NO	YES
PF3D7_1252100	PFL2505c	rhoptry neck protein 3 (RON3)	-3.55109	0.935834											√	√		√	√			4	NO	YES
PF3D7_1362100	MAL13P1.309	14-3-3 protein, putative	-0.241259	0.932527					√				√		√	√						4	NO	YES
PF3D7_0621100	PFF1020c	conserved Plasmodium protein, unknown function	-1.97961	0.926697												√		√	√	√		4	NO	YES
PF3D7_1449000	PF14_0467	conserved Plasmodium protein, unknown function	0.380621	0.89851									√		√	√			√			4	NO	YES
PF3D7_1421800	PF14_0210	conserved Plasmodium protein, unknown function	0.014645	0.891697					√				√		√	√						4	NO	YES
PF3D7_0404000	PFD0195c	conserved Plasmodium protein, unknown function	1.38332	0.850586	√		transcribed						√	√	√	√						4	YES	YES
PF3D7_0508000	PFE0395c	6-cysteine protein (P38)	-1.94597	0.811794										√		√		√	√			4	NO	YES
PF3D7_1410400	PF14_0102	rhoptry-associated protein 1 (RAP1)	-2.92799	0.805324											√	√		√	√			4	NO	YES
PF3D7_0806200	MAL8P1.135	conserved Plasmodium membrane protein, unknown function	-1.23366	0.803506												√			√	√	√	4	NO	YES
PF3D7_1341800	PF13_0226	conserved Plasmodium protein, unknown function	-0.489997	0.796772					√			√			√	√						4	NO	YES
PF3D7_0522100	PFE1105c	conserved Plasmodium protein, unknown function	-1.1206	0.773102										√		√		√	√			4	NO	YES
PF3D7_0617300	PFF0840w	conserved Plasmodium protein, unknown function	-2.57926	0.772619									√	√		√			√			4	NO	YES
PF3D7_1107900	PF11_0092	mechanosensitive ion channel protein	0.137879	0.770482					√						√	√			√			4	NO	YES
PF3D7_1215400	PFL0745c	conserved Plasmodium protein, unknown function	-1.54409	0.768454											√	√		√	√			4	NO	YES
PF3D7_1449100	PF14_0468	conserved Plasmodium protein, unknown function	-1.96901	0.733901											√	√		√	√			4	NO	YES
PF3D7_1206100	PFL0305c	IMP-specific 5'-nucleotidase, putative,haloacid dehalogenase hydrolase, putative	-0.398791	0.714991					√						√	√			√			4	NO	YES
PF3D7_0406700	PFD0330w	conserved Plasmodium protein, unknown function	-0.635231	0.708896										√	√	√			√			4	NO	YES
PF3D7_1022700	PF10_0220	phospholipid scramblase 1, putative	-1.11128	0.678984											√	√		√	√			4	NO	YES
PF3D7_0903700	PFI0180w	alpha tubulin 1	-2.89209	0.658049											√	√		√	√			4	NO	YES
PF3D7_1238000	PFL1840w	conserved Plasmodium membrane protein, unknown function	0.163471	0.652799									√		√	√			√			4	NO	YES
PF3D7_0630400	PFF1475c	conserved Plasmodium protein, unknown function	-2.47461	0.645885									√	√		√			√			4	NO	YES
PF3D7_1132800	PF11_0338	aquaglyceroporin (AQP)	-0.637152	0.63791									√			√		√	√			4	NO	YES
PF3D7_0605700	PFF0280w	conserved Plasmodium protein, unknown function	-0.123525	0.605837									√	√	√	√						4	NO	YES
PF3D7_1111600	PF11_0122	endonuclease/exonuclease/phosphatase family protein, putative	-0.115862	0.597468					√						√	√			√			4	NO	YES
PF3D7_0211400	PFB0505c	beta-ketoacyl-ACP synthase III (KASIII)	0.607914	0.594618					√				√	√		√						4	NO	YES
PF3D7_1471500	PF14_0682	conserved Plasmodium membrane protein, unknown function	0.471451	0.585515	√		transcribed		√				√		√	√						4	YES	YES
PF3D7_0105700	PFA0280w	asparagine-rich antigen Pfa35-2	-1.22814	0.571267										√	√	√		√				4	NO	YES
PF3D7_0504600	PFE0225w	3-methyl-2-oxobutanoate dehydrogenase (lipoamide), putative	-1.64722	0.567895											√	√		√	√			4	NO	YES
PF3D7_1108500	PF11_0097	succinyl-CoA synthetase alpha subunit, putative	-1.57925	0.547451											√	√		√	√			4	NO	YES
PF3D7_1235600	PFL1720w	serine hydroxymethyltransferase (SHMT)	-2.36324	0.541799											√	√		√	√			4	NO	YES
PF3D7_1312600	PF13_0070	branched-chain alpha keto-acid dehydrogenase, putative	-1.74911	0.53831											√	√		√	√			4	NO	YES
PF3D7_0909100	PFI0440w	conserved Plasmodium membrane protein, unknown function	-0.178277	0.528914					√				√	√		√						4	NO	YES
PF3D7_1349100	MAL13P1.248	nucleoside diphosphate hydrolase, putative	-1.58383	0.523364									√			√		√	√			4	NO	YES
PF3D7_1475400	PF14_0722	cysteine repeat modular protein 4 (CRMP4)	1.22088	0.523036	√		transcribed								√	√				√	√	4	YES	YES
PF3D7_1215000	PFL0725w	thioredoxin peroxidase 2 (Trx-Px2)	0.295967	0.512879									√			√		√	√			4	NO	YES
PF3D7_1110700	PF11_0114	actin-like protein homolog, ALP1 homolog	-1.74338	0.50883											√	√		√	√			4	NO	YES
PF3D7_1146300	PF11_0474	conserved Plasmodium protein, unknown function	0.440659	0.5071	√		transcribed						√		√	√			√			4	YES	YES
PF3D7_0932200	PFI1565w	profilin, putative (PFN)	-0.216066	0.484266											√	√		√	√			4	NO	YES
PF3D7_1409300	PF14_0090	DNA-damage inducible protein, putative	0.91966	0.480319												√		√	√	√		4	NO	YES
PF3D7_0811000	PF08_0094	cullin-like protein, putative	-0.377352	0.458897												√		√	√	√		4	NO	YES
PF3D7_1232200	PFL1550w	lipoamide dehydrogenase (mLipDH)	-1.22032	0.41389											√	√		√	√			4	NO	YES
PF3D7_1460600	PF14_0578	conserved Plasmodium protein, unknown function	-0.143388	0.413388				√								√		√	√			4	NO	YES
PF3D7_0314000	PFC0581w	co-chaperone p23 (P23)	-1.03807	0.410508										√		√		√	√			4	NO	YES
PF3D7_0813800	PF08_0077	GDP-mannose 4,6-dehydratase, putative	-0.13507	0.40493					√				√	√		√						4	NO	YES
PF3D7_0518900	PFE0950c	conserved Plasmodium protein, unknown function	0.611827	0.400415									√	√	√	√						4	NO	YES
PF3D7_1361400	PF13_0326	actin-depolymerizing factor 2 (ADF2)	1.45758	0.398855	√		transcribed									√			√	√	√	4	YES	YES
PF3D7_0722900	MAL7P1.123	conserved Plasmodium protein, unknown function	-0.975865	0.392113									√	√	√	√						4	NO	YES
PF3D7_0923800.1	PFI1170c	thioredoxin reductase (TRXR)	-0.300801	0.373336											√	√		√	√			4	NO	YES
PF3D7_1222500	PFL1080c	ATP-binding protein, putative	-0.862131	0.371358												√			√	√	√	4	NO	YES
PF3D7_1360000	PF13_0317	conserved Plasmodium protein, unknown function	-1.06376	0.362995									√			√		√	√			4	NO	YES
PF3D7_0605900	PFF0290w	long chain polyunsaturated fatty acid elongation enzyme, putative	-0.254609	0.361996											√	√		√	√			4	NO	YES
PF3D7_0410500	PFD0520c	conserved Plasmodium protein, unknown function	0.517897	0.361564									√	√	√	√						4	NO	YES
PF3D7_0417100	PFD0825c	RNA binding protein Puf2 (PUF2)	1.32648	0.35713	√		transcribed						√	√	√	√						4	YES	YES
PF3D7_0606300	PFF0310w	conserved Plasmodium protein, unknown function	-0.509383	0.348562									√	√		√			√			4	NO	YES
PF3D7_1251300	PFL2465c	thymidylate kinase (TMK)	-1.42601	0.344879									√			√		√	√			4	NO	YES
PF3D7_1112200	PF11_0128	coq4 homolog, putative	-0.345384	0.344336									√			√		√	√			4	NO	YES
PF3D7_1431600	PF14_0295	ATP-specific succinyl-CoA synthetase beta subunit, putative	-0.496863	0.338385											√	√		√	√			4	NO	YES
PF3D7_0312400	PFC0525c	glycogen synthase kinase 3 (GSK3)	0.307146	0.32715											√	√		√	√			4	NO	YES
PF3D7_1346000	MAL13P1.230	conserved Plasmodium protein, unknown function	0.311707	0.323125												√			√	√	√	4	NO	YES
PF3D7_1103800	PF11_0049	CCR4-NOT transcription complex subunit 1, putative (NOT1)	-1.32428	0.321048												√		√	√	√		4	NO	YES
PF3D7_0306500	PFC0280c	conserved Plasmodium protein, unknown function	-1.08512	0.313494											√	√		√	√			4	NO	YES
PF3D7_0525400	PFE1265w	G-protein coupled receptor, putative	-0.897793	0.311409									√	√		√			√			4	NO	YES
PF3D7_1328800	PF13_0152	transcriptional regulatory protein sir2a (SIR2A)	-0.04507	0.30431												√		√	√	√		4	NO	YES
PF3D7_1340700	MAL13P1.205	Rab GTPase 11b (RAB11b)	-1.60003	0.297503									√			√		√	√			4	NO	YES
PF3D7_0306000	PFC0262c	conserved Plasmodium protein, unknown function	-1.52294	0.297272									√	√		√			√			4	NO	YES
PF3D7_0505200	PFE0255w	actin-like protein, putative	-1.89142	0.291035												√		√	√	√		4	NO	YES
PF3D7_0406900	PFD0340c	conserved Plasmodium protein, unknown function	1.63786	0.280737	√		transcribed		√					√	√	√						4	YES	YES
PF3D7_1438700	PF14_0366	small subunit DNA primase	-0.049047	0.276867												√		√	√	√		4	NO	YES
PF3D7_0216400	PFB0750w	vacuolar protein-sorting protein VPS45, putative	-0.110483	0.255885										√		√		√	√			4	NO	YES
PF3D7_1331600	MAL13P1.168	protein tyrosine phosphatase, putative	-0.8345	0.253873									√		√	√			√			4	NO	YES
PF3D7_1433500	PF14_0316	DNA topoisomerase II, putative	-0.709503	0.251196												√		√	√	√		4	NO	YES
PF3D7_1214700	PFL0710w	conserved Plasmodium protein, unknown function	-0.072914	0.24626									√			√		√	√			4	NO	YES
PF3D7_1017000	PF10_0165	DNA polymerase delta catalytic subunit	-0.06454	0.239929												√		√	√	√		4	NO	YES
PF3D7_0927800	PFI1365w	cytochrome c oxidase subunit, putative	-0.701727	0.216061												√		√	√	√		4	NO	YES
PF3D7_1310300	PF13_0055	conserved Plasmodium protein, unknown function	-1.04975	0.212304											√	√		√	√			4	NO	YES
PF3D7_0909600	PFI0465c	conserved Plasmodium protein, unknown function	0.371166	0.209941										√		√		√	√			4	NO	YES
PF3D7_0308500	PFC0360w	activator of Hsp90 ATPase, putative	0.0950035	0.202822									√			√		√	√			4	NO	YES
PF3D7_1245100	PFL2165w	kinesin-like protein, putative	-1.3275	0.200839											√	√		√	√			4	NO	YES
PF3D7_0219600	PFB0895c	replication factor C subunit 1, putative	-1.2471	0.169954												√		√	√	√		4	NO	YES
PF3D7_0914900	PFI0730w	BSD domain, putative	-1.21369	0.168457										√		√		√	√			4	NO	YES
PF3D7_0515200	PFE0760w	conserved Plasmodium protein, unknown function	-1.11775	0.161507									√	√		√			√			4	NO	YES
PF3D7_0814700	PF08_0072	conserved Plasmodium protein, unknown function	0.247846	0.158845									√	√	√	√						4	NO	YES
PF3D7_0934300	PFI1660w	conserved Plasmodium protein, unknown function	-0.97885	0.158572									√	√		√			√			4	NO	YES
PF3D7_1366600	PF13_0350	signal recognition particle receptor alpha subunit (SRPR-alpha)	-0.34162	0.147154												√		√	√	√		4	NO	YES
PF3D7_0319800	PFC0880c	conserved Plasmodium protein, unknown function	-0.455988	0.145339									√	√		√			√			4	NO	YES
PF3D7_1463500	PF14_0604	conserved Plasmodium protein, unknown function	-0.765104	0.144581									√			√		√	√			4	NO	YES
PF3D7_1343700	PF13_0238	kelch protein, putative	-0.60668	0.137188												√		√	√	√		4	NO	YES
PF3D7_0418900	PFD0915w	conserved Plasmodium protein, unknown function	0.494096	0.136928									√	√	√	√						4	NO	YES
PF3D7_0606200	PFF0305c	ubiquitin conjugating enzyme E2, putative	-1.84491	0.133806									√	√		√			√			4	NO	YES
PF3D7_1457500	PF14_0548	ATPase Vps4, putative (VPS4)	-1.85385	0.128533												√		√	√	√		4	NO	YES
PF3D7_1230400	PFL1465c	ATP-dependent protease subunit ClpQ (ClpQ)	-0.659884	0.121803											√	√		√	√			4	NO	YES
PF3D7_1227700	PFL1340c	conserved Plasmodium protein, unknown function	-0.775292	0.11018											√	√		√	√			4	NO	YES
PF3D7_0708700	PF07_0032	Cg8 protein	-0.738623	0.109093												√		√	√	√		4	NO	YES
PF3D7_0518500	PFE0925c	ATP-dependent RNA helicase DDX23, putative (DDX23)	-0.391259	0.102481												√		√	√	√		4	NO	YES
PF3D7_1025100	PF10_0245	glucosamine-fructose-6-phosphate aminotransferase, putative	-0.470414	0.098775												√		√	√	√		4	NO	YES
PF3D7_0709700	PF07_0040	lysophospholipase, putative	-1.5339	0.080149										√		√		√	√			4	NO	YES
PF3D7_1358000	MAL13P1.285	patatin-like phospholipase, putative	-0.116989	0.069716												√			√	√	√	4	NO	YES
PF3D7_0218000	PFB0840w	replication factor C, subunit 2, putative	0.378417	0.0663665											√	√		√	√			4	NO	YES
PF3D7_1402200	PF14_0024	conserved Plasmodium protein, unknown function	1.04606	0.0651025	√		transcribed						√		√	√			√			4	YES	YES
PF3D7_0523300	PFE1165c	conserved Plasmodium protein, unknown function	0.940655	0.064781									√	√		√			√			4	NO	YES
PF3D7_0806800	PF08_0113	vacuolar proton translocating ATPase subunit A, putative	-0.518585	0.054873				√								√		√	√			4	NO	YES
PF3D7_0417200	PFD0830w	bifunctional dihydrofolate reductase-thymidylate synthase (DHFR-TS)	-1.56925	0.0469815											√	√		√	√			4	NO	YES
PF3D7_0908000	PFI0385c	P1 nuclease, putative	-2.32798	0.041541												√		√	√	√		4	NO	YES
PF3D7_1401800	PF14_0020	choline kinase (CK)	-0.242019	0.0339185												√		√	√	√		4	NO	YES
PF3D7_1110500	PF11_0112	vacuolar sorting protein 35, putative	-1.36456	0.0329855												√		√	√	√		4	NO	YES
PF3D7_1034400	PF10_0334	flavoprotein subunit of succinate dehydrogenase (SDHA)	-0.32726	0.026941												√		√	√	√		4	NO	YES
PF3D7_1344100	MAL13P1.395	krox-like protein. putative	-0.130514	0.0252965												√			√	√	√	4	NO	YES
PF3D7_0608400	PFF0415c	conserved Plasmodium protein, unknown function	-1.38506	-0.0080545									√	√	√	√						4	NO	YES
PF3D7_1021600	PF10_0210	deoxyribose-phosphate aldolase, putative	-0.882664	-0.0147355									√			√		√	√			4	NO	YES
PF3D7_1244100	PFL2120w	conserved Plasmodium protein, unknown function	-0.225761	-0.0276635												√		√	√	√		4	NO	YES
PF3D7_1111900	PF11_0125	conserved Plasmodium protein, unknown function	0.555991	-0.035797									√			√		√	√			4	NO	YES
PF3D7_1324800	PF13_0140	dihydrofolate synthase/folylpolyglutamate synthase (DHFS-FPGS)	1.01451	-0.0382595	√		transcribed								√	√			√	√		4	YES	YES
PF3D7_1330600	MAL13P1.164	elongation factor Tu, putative	0.0840435	-0.0616265												√		√	√	√		4	NO	YES
PF3D7_1240000	PFL1940w	3-hydroxyisobutyryl-coenzyme A hydrolase, putative	-0.522691	-0.0649835												√		√	√	√		4	NO	YES
PF3D7_0516400	PFE0820c	conserved Plasmodium protein, unknown function	-0.716484	-0.0703795										√	√	√			√			4	NO	YES
PF3D7_1446600	PF14_0443	centrin-2 (CEN2)	0.736768	-0.0709465											√	√		√	√			4	NO	YES
PF3D7_0110700	PFA0520c	chromatin assembly factor 1 protein WD40 domain, putative	1.141	-0.079294	√		transcribed						√			√		√	√			4	YES	YES
PF3D7_1210100	PFL0505c	syntaxin, Qa-SNARE family (SYN2)	-1.59342	-0.079926									√			√		√	√			4	NO	YES
PF3D7_1434700	PF14_0328	mitochondrial import inner membrane translocase subunit tim17, putative	-0.781845	-0.086161									√			√		√	√			4	NO	YES
PF3D7_1469700	PF14_0665	conserved Plasmodium protein, unknown function	0.780977	-0.087872									√			√		√	√			4	NO	YES
PF3D7_0410900	PFD0540c	conserved Plasmodium protein, unknown function	-0.581472	-0.0914045										√	√	√			√			4	NO	YES
PF3D7_1346600	PF13_0246	conserved Plasmodium protein, unknown function	0.756219	-0.0963425									√			√		√	√			4	NO	YES
PF3D7_0606600	PFF0325c	conserved Plasmodium protein, unknown function	-0.482712	-0.102981												√		√	√	√		4	NO	YES
PF3D7_1423600	PF14_0227	serine/threonine protein kinase, putative	-0.421067	-0.110493								√	√		√	√						4	NO	YES
PF3D7_1363400	PF13_0335	conserved Plasmodium protein, unknown function	-0.170956	-0.116167												√		√	√	√		4	NO	YES
PF3D7_0603100	PFF0150c	conserved Plasmodium protein, unknown function	-0.39011	-0.121632										√		√		√	√			4	NO	YES
PF3D7_1003300	PF10_0036	N-acetyltransferase, putative	0.749093	-0.135916										√		√		√	√			4	NO	YES
PF3D7_0622500	PFF1085c	RNA methyltransferase, putative	-0.0254835	-0.138748										√		√		√	√			4	NO	YES
PF3D7_0916100	PFI0790w	thioredoxin 3 (TRX3)	-1.80108	-0.144451									√	√		√			√			4	NO	YES
PF3D7_0517400	PFE0870w	FACT complex subunit SPT16, putative (FACT-L)	-0.567351	-0.149138												√		√	√	√		4	NO	YES
PF3D7_0507600	PFE0375w	cell differentiation protein, putative (CAF40)	-1.69652	-0.149355												√		√	√	√		4	NO	YES
PF3D7_1347700	PF13_0253	ethanolamine-phosphate cytidylyltransferase, putative (ECT)	-0.803967	-0.156168				√								√		√	√			4	NO	YES
PF3D7_0723300	MAL7P1.125	conserved Plasmodium protein, unknown function	-0.722654	-0.174981											√	√				√	√	4	NO	YES
PF3D7_0926900	PFI1320c	conserved Plasmodium protein, unknown function	0.818505	-0.175999									√	√	√	√						4	NO	YES
PF3D7_0826500	PF08_0020	ubiquitination-mediated degradation component, putative	-1.19318	-0.189407												√		√	√	√		4	NO	YES
PF3D7_0530000	PFE1500c	conserved Plasmodium protein, unknown function	-1.5046	-0.191523									√	√	√	√						4	NO	YES
PF3D7_1320900	PF13_0122	RNA-binding protein, putative	-1.44041	-0.194778									√			√		√	√			4	NO	YES
PF3D7_1450100	PF14_0477	signal recognition particle SRP54 (SRP54)	-0.707847	-0.198008												√		√	√	√		4	NO	YES
PF3D7_1137400	PF11_0385	UVB-resistance protein UVR8 homologue	1.22305	-0.201724	√		transcribed								√	√		√	√			4	YES	YES
PF3D7_1311300	PF13_0061	ATP synthase subunit gamma, mitochondrial	-0.488149	-0.204754									√			√		√	√			4	NO	YES
PF3D7_1303000	MAL13P1.15	conserved Plasmodium protein, unknown function	-0.347428	-0.205496									√			√		√	√			4	NO	YES
PF3D7_1320600	PF13_0119	Rab GTPase 11a (RAB11a)	-1.67704	-0.209463									√			√		√	√			4	NO	YES
PF3D7_1460100	PF14_0574	zinc finger protein, putative	-1.51458	-0.211023											√	√		√	√			4	NO	YES
PF3D7_0624600	PFF1185w	SNF2 helicase, putative (ISWI)	-1.19772	-0.212163												√		√	√	√		4	NO	YES
PF3D7_0810500	MAL8P1.108	protein phosphatase, putative	0.316147	-0.225027												√		√	√	√		4	NO	YES
PF3D7_1113700	PF11_0145	glyoxalase I (GloI)	-0.401826	-0.226375												√		√	√	√		4	NO	YES
PF3D7_1464600	PF14_0614	phosphatase, putative	-0.0349565	-0.228963				√								√		√	√			4	NO	YES
PF3D7_0613700	PFF0665c	syntaxin binding protein, putative	-0.354233	-0.233716										√		√		√	√			4	NO	YES
PF3D7_1136400	PF11_0375	conserved Plasmodium protein, unknown function	0.635305	-0.235631												√		√	√	√		4	NO	YES
PF3D7_0722100	MAL7P1.118	PelOta protein homologue, putative	-1.20206	-0.236112											√	√		√	√			4	NO	YES
PF3D7_1213600	PFL0660w	dynein light chain 1, putative	-0.907269	-0.238853									√		√	√			√			4	NO	YES
PF3D7_1303200.1	MAL13P1.16	SNARE protein, putative (VAMP8)	-1.04148	-0.244537									√			√		√	√			4	NO	YES
PF3D7_0528100	PFE1400c	beta adaptin protein, putative	-1.24793	-0.247892												√		√	√	√		4	NO	YES
PF3D7_1222100	PFL1065c	conserved Plasmodium protein, unknown function	-0.490712	-0.251499												√		√	√	√		4	NO	YES
PF3D7_1459000	PF14_0563	ATP-dependent RNA helicase DBP5 (DBP5)	-0.29945	-0.258435												√		√	√	√		4	NO	YES
PF3D7_0109200	PFA0450c	mRNA cleavage factor-like protein, putative	-0.385496	-0.261088									√	√		√			√			4	NO	YES
PF3D7_0317300	PFC0760c	conserved Plasmodium protein, unknown function	-1.36757	-0.264165												√		√	√	√		4	NO	YES
PF3D7_1403600	PF14_0033	selenoprotein (Sel1)	-1.12945	-0.270837									√		√	√			√			4	NO	YES
PF3D7_1353800	PF13_0282	proteasome subunit, putative	-1.77946	-0.272107									√			√		√	√			4	NO	YES
PF3D7_1118000	PF11_0186	conserved Plasmodium protein, unknown function	-0.449072	-0.275903									√			√		√	√			4	NO	YES
PF3D7_0704600	MAL7P1.19	ubiquitin transferase, putative	-0.130547	-0.276441												√		√	√	√		4	NO	YES
PF3D7_1219900	PFL0960w	D-ribulose-5-phosphate 3-epimerase, putative	-1.25457	-0.278054									√			√		√	√			4	NO	YES
PF3D7_1121700	PF11_0225	protein GCN20 (GCN20)	-1.45062	-0.278659												√		√	√	√		4	NO	YES
PF3D7_1315600	MAL13P1.82	phosphatidylinositol synthase (PIS)	-1.76799	-0.280988									√			√		√	√			4	NO	YES
PF3D7_1365500	PF13_0345	glycine cleavage T protein, putative (GCVT)	-0.0884785	-0.296873												√		√	√	√		4	NO	YES
PF3D7_0720800	MAL7P1.110	Ham1-like protein, putative	1.11923	-0.300339	√		transcribed						√			√		√	√			4	YES	YES
PF3D7_0723000	PF07_0095	tRNAHis guanylyltransferase, putative	-0.686857	-0.315609										√	√	√			√			4	NO	YES
PF3D7_0519200	PFE0965c	vacuolar ATP synthetase	-1.16819	-0.317592												√			√	√	√	4	NO	YES
PF3D7_1241900	PFL2015w	Tetratricopeptide repeat protein, putative	-0.95425	-0.318506												√		√	√	√		4	NO	YES
PF3D7_1433600	PF14_0317	microsomal signal peptidase protein, putative (SPC1)	-0.126628	-0.321691									√			√		√	√			4	NO	YES
PF3D7_1358900	MAL13P1.294	GTP binding protein, putative	-0.197288	-0.32307												√		√	√	√		4	NO	YES
PF3D7_1132300	PF11_0332	nucleic acid binding protein, putative	-1.48949	-0.323746											√	√		√	√			4	NO	YES
PF3D7_0817500	PF08_0059	protein kinase c inhibitor-like protein, putative	-0.0696385	-0.325157									√			√		√	√			4	NO	YES
PF3D7_1124700	PF11_0258	co-chaperone GrpE, putative	-1.13997	-0.332164											√	√		√	√			4	NO	YES
PF3D7_1438900	PF14_0368	thioredoxin peroxidase 1 (Trx-Px1)	-0.462832	-0.335789									√			√		√	√			4	NO	YES
PF3D7_1405200	PF14_0049	sybindin-like protein, putative	-1.2991	-0.339114									√		√	√			√			4	NO	YES
PF3D7_1128400	PF11_0295	geranylgeranyl pyrophosphate synthase, putative (GGPPS)	1.08206	-0.341471	√		transcribed									√		√	√	√		4	YES	YES
PF3D7_0209400	PFB0423c	conserved protein, unknown function	-1.06477	-0.355733										√		√		√	√			4	NO	YES
PF3D7_1113100	PF11_0139	protein tyrosine phosphatase (PRL)	0.909217	-0.358049				√								√		√	√			4	NO	YES
PF3D7_1341900	PF13_0227	vacuolar ATP synthase subunit d, putative	-1.45368	-0.36813									√			√		√	√			4	NO	YES
PF3D7_0213000	PFB0590w	conserved Plasmodium protein, unknown function	1.17965	-0.368373	√		transcribed						√	√		√			√			4	YES	YES
PF3D7_1304500	PF13_0021	small heat shock protein, putative	0.768731	-0.371008									√			√		√	√			4	NO	YES
PF3D7_1203900	PFL0190w	ubiquitin conjugating enzyme E2, putative (UBC)	-3.20535	-0.37353									√			√		√	√			4	NO	YES
PF3D7_0802200	PF08_0131	1-cys peroxiredoxin (1-cyspxn)	-0.838241	-0.374868											√	√		√	√			4	NO	YES
PF3D7_1320000	PF13_0116	rhoptry protein 2, putative (PRP2)	-0.697321	-0.380327												√		√	√	√		4	NO	YES
PF3D7_0309800	PFC0410w	YT521-B-like family protein, putative	-1.01062	-0.381869									√	√		√		√				4	NO	YES
PF3D7_0604500	PFF0220w	conserved Plasmodium protein, unknown function	-0.342367	-0.384991												√		√	√	√		4	NO	YES
PF3D7_1332300	PF13_0174	sedlin, putative	0.973748	-0.387107									√			√		√	√			4	NO	YES
PF3D7_0413700	PFD0670c	lysine decarboxylase-like protein, putative	0.395192	-0.394346												√		√	√	√		4	NO	YES
PF3D7_0319100	PFC0845c	ubiquitin-protein ligase, putative	1.98331	-0.416561	√		transcribed						√	√		√			√			4	YES	YES
PF3D7_0905900	PFI0290c	beta subunit of coatomer complex, putative	-1.78607	-0.416706												√		√	√	√		4	NO	YES
PF3D7_1010700	PF10_0104	dolichyl-phosphate-mannose protein mannosyltransferase, putative	0.90647	-0.419229									√			√		√	√			4	NO	YES
PF3D7_0403700	PFD0180c	CGI-201 protein, short form	0.407879	-0.420834												√		√	√	√		4	NO	YES
PF3D7_0505900	PFE0290c	conserved Plasmodium protein, unknown function	-0.999771	-0.424288									√	√		√			√			4	NO	YES
PF3D7_1406200	PF14_0059	conserved Plasmodium protein, unknown function	0.672408	-0.426354												√			√	√	√	4	NO	YES
PF3D7_1356200	PF13_0300	mitochondrial inner membrane translocase, putative	0.383037	-0.430638									√			√		√	√			4	NO	YES
PF3D7_0726500	MAL7P1.147	ubiquitin carboxyl-terminal hydrolase, putative	-1.01911	-0.438511										√		√		√	√			4	NO	YES
PF3D7_0812100	PF08_0089	conserved Plasmodium protein, unknown function	-0.527768	-0.449949												√		√	√	√		4	NO	YES
PF3D7_1104200	PF11_0053	chromatin remodeling protein (SNF2L)	-0.0311485	-0.451203												√		√	√	√		4	NO	YES
PF3D7_1469100	PF14_0659	conserved Plasmodium protein, unknown function	-0.218986	-0.452906											√	√		√	√			4	NO	YES
PF3D7_0215700	PFB0715w	DNA-directed RNA polymerase II second largest subunit, putative	-1.02266	-0.453868												√		√	√	√		4	NO	YES
PF3D7_0310300	PFC0430w	phosphoglycerate mutase, putative	-0.0169705	-0.454138											√	√		√	√			4	NO	YES
PF3D7_0725200	MAL7P1.139	mago nashi protein homolog, putative	0.989409	-0.454229										√		√				√	√	4	NO	YES
PF3D7_1336900	PF13_0205	tryptophan--tRNA ligase, putative	-0.482726	-0.461227												√		√	√	√		4	NO	YES
PF3D7_0711500	MAL7P1.38	regulator of chromosome condensation, putative	-0.950572	-0.462452												√		√	√	√		4	NO	YES
PF3D7_0522800	PFE1140c	G10 protein, putative	0.671034	-0.463223												√			√	√	√	4	NO	YES
PF3D7_1417500	PF14_0174	pseudouridine synthase, putative	0.233756	-0.465496												√		√	√	√		4	NO	YES
PF3D7_0915100	PFI0740c	ubiquitin conjugating enzyme, putative	-0.294382	-0.466201												√			√	√	√	4	NO	YES
PF3D7_0819900	PF08_0049	U6 snRNA-associated Sm-like protein LSm3, putative (LSM3)	-0.185109	-0.469652									√	√		√			√			4	NO	YES
PF3D7_1350500	PF13_0265	conserved Plasmodium protein, unknown function	-1.54378	-0.470105												√			√	√	√	4	NO	YES
PF3D7_0520400	PFE1025c	conserved Plasmodium protein, unknown function	0.312508	-0.47344												√		√	√	√		4	NO	YES
PF3D7_0920100	PFI0985c	chaperone, putative	-0.268728	-0.475552									√	√		√			√			4	NO	YES
PF3D7_0608300	PFF0410w	conserved Plasmodium protein, unknown function	0.638732	-0.476905										√		√		√	√			4	NO	YES
PF3D7_0608310	PFF0410w	conserved Plasmodium protein, unknown function	0.638732	-0.476905										√		√		√	√			4	NO	YES
PF3D7_1241200	PFL1980c	conserved Plasmodium protein, unknown function	0.390504	-0.486389												√		√	√	√		4	NO	YES
PF3D7_0625700	PFF1245c	conserved Plasmodium protein, unknown function	1.22006	-0.488101	√		transcribed						√	√		√			√			4	YES	YES
PF3D7_1309500	PF13_0051	small nucleolar ribonucleoprotein, putative	-1.68143	-0.490754											√	√		√	√			4	NO	YES
PF3D7_1423800	PF14_0229	conserved Plasmodium protein, unknown function	0.236579	-0.491653												√			√	√	√	4	NO	YES
PF3D7_0707600	PF07_0025	conserved Plasmodium protein, unknown function	-0.607658	-0.49235									√	√		√		√				4	NO	YES
PF3D7_0711000	PF07_0047	AAA family ATPase, CDC48 subfamily (Cdc48)	0.426886	-0.497549												√		√	√	√		4	NO	YES
PF3D7_1364000	MAL13P1.321	conserved Plasmodium protein, unknown function	-0.209759	-0.500908												√			√	√	√	4	NO	YES
PF3D7_1250700	PFL2435w	conserved Plasmodium protein, unknown function	0.212099	-0.502726									√			√		√	√			4	NO	YES
PF3D7_1342800	PF13_0234	phosphoenolpyruvate carboxykinase (PEPCK)	0.554156	-0.503756											√	√		√	√			4	NO	YES
PF3D7_0708300	MAL7P1.26	O-sialoglycoprotein endopeptidase, putative	0.0044165	-0.510606									√			√		√	√			4	NO	YES
PF3D7_0418100	PFD0875c	conserved Plasmodium protein, unknown function	0.902384	-0.51293												√			√	√	√	4	NO	YES
PF3D7_0318200	PFC0805w	DNA-directed RNA polymerase II, putative	-0.954584	-0.514131												√		√	√	√		4	NO	YES
PF3D7_0619900	PFF0970w	splicing factor 3A subunit 2, putative (SF3A2)	-0.718975	-0.51685										√		√		√	√			4	NO	YES
PF3D7_1323200	PF13_0130	vacuolar ATP synthase subunit g, putative	-1.7073	-0.524765									√			√		√	√			4	NO	YES
PF3D7_0918900	PFI0925w	gamma-glutamylcysteine synthetase (gammaGCS)	-1.19127	-0.525127												√		√	√	√		4	NO	YES
PF3D7_0917600	PFI0860c	pre-mRNA-splicing factor ATP-dependent RNA helicase PRP43, putative (PRP43)	-0.818422	-0.543691												√		√	√	√		4	NO	YES
PF3D7_1141600	PF11_0427	dolichol phosphate mannose synthase (DPM1)	0.608841	-0.544821												√		√	√	√		4	NO	YES
PF3D7_0105200	PFA0255c	conserved Plasmodium protein, unknown function	-0.53828	-0.547263												√		√	√	√		4	NO	YES
PF3D7_1231500	PFL1520w	DIM1 protein homolog, putative	-0.741939	-0.557428									√			√		√	√			4	NO	YES
PF3D7_1470700	PF14_0674	conserved Plasmodium protein, unknown function	0.100382	-0.564947											√	√		√	√			4	NO	YES
PF3D7_0210900	PFB0490c	conserved Plasmodium protein, unknown function	0.953358	-0.565833												√		√	√	√		4	NO	YES
PF3D7_1403900	PF14_0036	phosphatase, putative	-1.47786	-0.5817									√			√		√	√			4	NO	YES
PF3D7_0726900	PF07_0110	protein phosphatase, putative	-0.657034	-0.595398										√		√		√	√			4	NO	YES
PF3D7_1140100	PF11_0412	vacuolar ATP synthase subunit f, putative	-1.54037	-0.595645												√		√	√	√		4	NO	YES
PF3D7_0807300	PF08_0110	Rab GTPase 18 (RAB18)	-1.69715	-0.598003									√			√		√	√			4	NO	YES
PF3D7_1011400	PF10_0111	proteasome subunit beta type-5	-1.43932	-0.598355										√		√		√	√			4	NO	YES
PF3D7_1118500	PF11_0191	box C/D snoRNP rRNA 2'-O-methylation factor, putative	0.846102	-0.601025												√		√	√	√		4	NO	YES
PF3D7_1455500	PF14_0529	gamma-adaptin, putative	-1.59404	-0.603888												√		√	√	√		4	NO	YES
PF3D7_1116300	PF11_0170	peptidyl-prolyl cis-trans isomerase (CYP19C)	0.853891	-0.604942									√			√		√	√			4	NO	YES
PF3D7_1014700	PF10_0144	prohibitin, putative	0.471947	-0.606036									√			√		√	√			4	NO	YES
PF3D7_1367000	MAL13P1.337	suppressor of kinetochore protein 1, putative	0.204374	-0.611936									√			√		√	√			4	NO	YES
PF3D7_1360200	MAL13P1.299	conserved protein, unknown function	-1.10473	-0.614745												√		√	√	√		4	NO	YES
PF3D7_0210000	PFB0450w	secretory complex protein 61 gamma subunit (Sec61-gamma)	-1.93474	-0.62158										√		√		√	√			4	NO	YES
PF3D7_1423700	PF14_0228	conserved Plasmodium protein, unknown function	0.334249	-0.628972												√		√	√	√		4	NO	YES
PF3D7_1438000	PF14_0360	eukaryotic translation initiation factor eIF2A, putative	0.281803	-0.630073												√		√	√	√		4	NO	YES
PF3D7_1212000	PFL0595c	glutathione peroxidase (Trx-G1)	-0.738027	-0.630946									√			√		√	√			4	NO	YES
PF3D7_0618200	PFF0880c	conserved Plasmodium protein, unknown function	0.914593	-0.634502												√		√	√	√		4	NO	YES
PF3D7_1224900	PFL1200c	splicing factor 3b subunit, putative (SF3B14)	1.12846	-0.641282	√		transcribed						√			√		√	√			4	YES	YES
PF3D7_0904500	PFI0220w	prefoldin subunit, putative	-0.711671	-0.641872									√	√		√			√			4	NO	YES
PF3D7_1445700	PF14_0434	conserved Plasmodium protein, unknown function	1.12999	-0.642954	√		transcribed									√		√	√	√		4	YES	YES
PF3D7_0527100	PFE1350c	ubiquitin-conjugating enzyme E2 N, putative (UBC13)	-1.07387	-0.646103									√			√		√	√			4	NO	YES
PF3D7_1416900	PF14_0167	prefoldin subunit 2, putative	1.5061	-0.651964	√		transcribed						√			√		√	√			4	YES	YES
PF3D7_0302100	PFC0105w	serine/threonine protein kinase (SRPK1)	0.221608	-0.662532												√		√	√	√		4	NO	YES
PF3D7_1468900	PF14_0657	conserved Plasmodium protein, unknown function	-0.568759	-0.666071												√		√	√	√		4	NO	YES
PF3D7_0529000	PFE1445c	conserved Plasmodium protein, unknown function	-0.6312	-0.684339												√		√	√	√		4	NO	YES
PF3D7_0710100	PF07_0041	conserved Plasmodium protein, unknown function	0.551945	-0.69348										√		√		√	√			4	NO	YES
PF3D7_1147900	PF11_0487	conserved Plasmodium protein, unknown function	-1.68108	-0.694716												√			√	√	√	4	NO	YES
PF3D7_1223700	PFL1140w	integral membrane protein, putative	0.546949	-0.695448									√			√		√	√			4	NO	YES
PF3D7_0414300	PFD0669c	conserved Plasmodium protein, unknown function	-0.840931	-0.708832										√		√		√	√			4	NO	YES
PF3D7_0515800	PFE0790c	BolA-like protein, putative	-0.767938	-0.717297									√	√	√	√						4	NO	YES
PF3D7_1216200	PFL0780w	glycerol-3-phosphate dehydrogenase, putative	0.772526	-0.717708												√		√	√	√		4	NO	YES
PF3D7_0802000	PF08_0132	glutamate dehydrogenase, putative (GDHc)	0.703907	-0.720676												√		√	√	√		4	NO	YES
PF3D7_0212400	PFB0555c	conserved Plasmodium membrane protein, unknown function	0.077162	-0.735197												√			√	√	√	4	NO	YES
PF3D7_0507700	PFE0380c	nuclear protein localization protein 4, putative (NPL4)	-1.26757	-0.745086												√		√	√	√		4	NO	YES
PF3D7_1368200	MAL13P1.344	RNAse L inhibitor protein, putative	-0.442582	-0.748857												√		√	√	√		4	NO	YES
PF3D7_1023200	PF10_0225	orotidine monophosphate decarboxylase (OMPDC)	1.57562	-0.7583	√		transcribed									√		√	√	√		4	YES	YES
PF3D7_1112500	PF11_0526	conserved Plasmodium protein, unknown function	-0.613611	-0.759443												√		√	√	√		4	NO	YES
PF3D7_1311700	MAL13P1.55	cytochrome c2 precursor, putative	0.373174	-0.785827									√		√	√			√			4	NO	YES
PF3D7_1459800	PF14_0571	conserved Plasmodium membrane protein, unknown function	0.289945	-0.789542									√			√		√	√			4	NO	YES
PF3D7_1007000	PF10_0070	conserved Plasmodium membrane protein, unknown function	0.280045	-0.794342									√	√		√			√			4	NO	YES
PF3D7_0218500	PFB0865w	small nuclear ribonucleoprotein Sm D2, putative (SNRPD2)	-0.848131	-0.804677									√			√		√	√			4	NO	YES
PF3D7_0630500	PFF1480w	microtubule-associated protein ytm1 homologue, putative	0.559919	-0.813198										√		√		√	√			4	NO	YES
PF3D7_1305300	MAL13P1.26	conserved Plasmodium protein, unknown function	0.072671	-0.829476												√		√	√	√		4	NO	YES
PF3D7_0422700	PFD1070w	eukaryotic initiation factor, putative	0.846481	-0.830889												√		√	√	√		4	NO	YES
PF3D7_0415500	PFD0750w	nuclear cap-binding protein, putative	-0.0925435	-0.83279												√		√	√	√		4	NO	YES
PF3D7_1137300	PF11_0384	conserved Plasmodium membrane protein, unknown function	0.021984	-0.837023												√		√	√	√		4	NO	YES
PF3D7_0621900	PFF1055c	conserved Plasmodium protein, unknown function	-1.55906	-0.83857												√		√	√	√		4	NO	YES
PF3D7_1211400	PFL0565w	heat shock protein DNAJ homologue Pfj4 (PfJ4)	1.93205	-0.839603	√		transcribed						√			√		√	√			4	YES	YES
PF3D7_0804800	PF08_0121	peptidyl-prolyl cis-trans isomerase (CYP24)	0.624055	-0.848602										√		√		√	√			4	NO	YES
PF3D7_0312800	PFC0535w	60S ribosomal protein L26, putative	-2.46384	-0.857191									√			√		√	√			4	NO	YES
PF3D7_1404100	PF14_0038	cytochrome c, putative	1.15833	-0.875486	√		transcribed						√			√		√	√			4	YES	YES
PF3D7_0511000	PFE0545c	translationally controlled tumor protein homolog, putative	-0.45189	-0.881114										√		√		√	√			4	NO	YES
PF3D7_1242700	PFL2055w	40S ribosomal protein S17, putative	-2.10764	-0.901991									√			√		√	√			4	NO	YES
PF3D7_0419800	PFD0960c	60S ribosomal protein L7ae/L30e, putative	-1.25177	-0.906898										√		√		√	√			4	NO	YES
PF3D7_0811200	MAL8P1.105	conserved protein, unknown function	-0.680053	-0.90855												√		√	√	√		4	NO	YES
PF3D7_1310500	MAL13P1.50	conserved Plasmodium protein, unknown function	-0.816599	-0.911925									√			√		√	√			4	NO	YES
PF3D7_0935000	PFI1695c	small nuclear ribonucleoprotein (snRNP), putative	0.777485	-0.927557										√		√		√	√			4	NO	YES
PF3D7_0723600	PF07_0099	conserved Plasmodium protein, unknown function	1.17942	-0.944322	√		transcribed						√			√		√	√			4	YES	YES
PF3D7_1103700	PF11_0048	casein kinase II beta chain (CK2beta1)	-1.79545	-0.949035												√		√	√	√		4	NO	YES
PF3D7_1315900	MAL13P1.83	exportin 1-like protein, putative	-0.816678	-0.963042												√		√	√	√		4	NO	YES
PF3D7_1407500	PF14_0072	tRNA m2G10 methyltransferase subunit, putative	0.538263	-0.985716									√			√		√	√			4	NO	YES
PF3D7_0823800	PF08_0032	DnaJ protein, putative	-1.30255	-1.02689												√		√	√	√		4	NO	YES
PF3D7_0316800	PFC0735w	40S ribosomal protein S15A, putative	-1.0161	-1.03468									√			√		√	√			4	NO	YES
PF3D7_1344900	MAL13P1.222	conserved Plasmodium protein, unknown function	-1.03908	-1.0391												√			√	√	√	4	NO	YES
PF3D7_1246800	PFL2245w	signal recognition particle receptor, beta subunit (SRPR-beta)	0.835656	-1.04215												√		√	√	√		4	NO	YES
PF3D7_0708100	PF07_0027	DNA-directed RNA polymerase 2 8.2 kDa polypeptide, putative	1.16052	-1.06506	√		transcribed							√		√		√	√			4	YES	YES
PF3D7_1123900	PF11_0250	splicing factor, putative	1.47679	-1.16708	√		transcribed						√			√		√	√			4	YES	YES
PF3D7_0903900	PFI0190w	60S ribosomal protein L32, putative	-1.50593	-1.16825									√			√		√	√			4	NO	YES
PF3D7_1431700	PF14_0296	60S ribosomal protein L14, putative	-0.807073	-1.17967									√			√		√	√			4	NO	YES
PF3D7_0903100	PFI0150c	retrieval receptor for endoplasmic reticulum membrane proteins, putative	-1.43871	-1.18717										√		√		√	√			4	NO	YES
PF3D7_1126200	PF11_0272	40S ribosomal protein S18, putative	-1.36757	-1.30305									√			√		√	√			4	NO	YES
PF3D7_1103100	PF11_0043	60S ribosomal protein P1, putative	0.740706	-1.35713									√			√		√	√			4	NO	YES
PF3D7_1125500	PF11_0266	small nuclear ribonucleoprotein D1, putative (SNRPD1)	-0.141801	-1.37758												√		√	√	√		4	NO	YES
PF3D7_1412300	PF14_0122	nuclear transport factor 2, putative	1.02596	-1.39433	√		transcribed						√			√		√	√			4	YES	YES
PF3D7_0505800	PFE0285c	small ubiquitin-related modifier, putative (SUMO)	1.7939	-1.40574	√		transcribed						√			√		√	√			4	YES	YES
PF3D7_0322000	PFC0975c	peptidyl-prolyl cis-trans isomerase (CYP19A)	2.00237	-1.64945	√		transcribed						√			√		√	√			4	YES	YES
PF3D7_1461300	PF14_0585	40S ribosomal protein S28e, putative	1.06996	-1.74791	√		transcribed						√			√		√	√			4	YES	YES
PF3D7_1308300	PF13_0045	40S ribosomal protein S27, putative	0.240769	-1.79959									√			√		√	√			4	NO	YES
PF3D7_1104700.2	PF11_0058-b	RNA polymerase subunit, putative	n.d.	n.d.									√			√		√	√			4	NO	YES
PF3D7_0405800	PFD0290w	conserved Plasmodium protein, unknown function	1.61698	1.95985	√	√	balance						√	√	√	√						4	YES	YES
PF3D7_0214600	PFB0665w	serine/threonine protein kinase, putative	0.47942	1.90791		√	stabilized	√				√			√	√						4	YES	YES
PF3D7_0515400	PFE0770w	conserved Plasmodium protein, unknown function	-2.35325	1.5399		√	stabilized					√		√	√	√						4	YES	YES
PF3D7_1477400	PF14_0745	probable protein, unknown function	0.0971855	1.52126		√	stabilized			√	√		√			√						4	YES	YES
PF3D7_0805300	PF08_0118	conserved Plasmodium protein, unknown function	-0.357786	1.49947		√	stabilized					√		√	√	√						4	YES	YES
PF3D7_1028700	PF10_0281	merozoite TRAP-like protein (MTRAP)	0.588037	1.3802		√	stabilized	√							√	√			√			4	YES	YES
PF3D7_0903600.1	PFI0175w	conserved Plasmodium protein, unknown function	-0.252876	1.36535		√	stabilized	√							√	√			√			4	YES	YES
PF3D7_0421900	PFD1007w	conserved Plasmodium protein, unknown function	-0.8925	1.34005		√	stabilized						√	√	√	√						4	YES	YES
PF3D7_1204400	PFL0220c	conserved Plasmodium membrane protein, unknown function	0.530245	1.33671	√	√	balance		√				√		√	√						4	YES	YES
PF3D7_1358600	PF13_0314	zinc finger protein, putative	-0.950843	1.27959		√	stabilized		√			√			√	√						4	YES	YES
PF3D7_0210600	PFB0475c	conserved Plasmodium protein, unknown function	-1.12244	1.27559		√	stabilized	√						√	√	√						4	YES	YES
PF3D7_0518800	PFE0940c	secreted ookinete protein, putative (PSOP13)	1.40163	1.26006	√	√	balance						√	√	√	√						4	YES	YES
PF3D7_0214300	PFB0650w	conserved Plasmodium protein, unknown function	-0.462201	1.25319		√	stabilized							√		√	√	√				4	YES	YES
PF3D7_0801400	PF08_0136	probable protein, unknown function	-0.177281	1.23399		√	stabilized						√	√	√	√						4	YES	YES
PF3D7_0506400	PFE0315c	conserved Plasmodium protein, unknown function	-1.13661	1.21066		√	stabilized						√	√	√	√						4	YES	YES
PF3D7_0316000	PFC0700c	conserved Plasmodium protein, unknown function	-1.63833	1.18977		√	stabilized						√	√	√	√						4	YES	YES
PF3D7_0403800	PFD0185c	conserved Plasmodium protein, unknown function	-2.34488	1.13728		√	stabilized	√						√	√	√						4	YES	YES
PF3D7_1147200	PF11_0481	tubulin-tyrosine ligase, putative	-0.749269	1.06549		√	stabilized		√				√		√	√						4	YES	YES
PF3D7_1226100	PFL1260w	hydrolase/phosphatase, putative	-0.755221	1.0553		√	stabilized						√			√		√	√			4	YES	YES
PF3D7_1239400	PFL1910c	conserved Plasmodium protein, unknown function	0.873685	1.04625		√	stabilized		√				√		√	√						4	YES	YES
PF3D7_1233200.2	PFL1600c	conserved Plasmodium protein, unknown function	-0.912191	1.02179		√	stabilized						√		√	√		√				4	YES	YES
PF3D7_0825700	PF08_0024	conserved Plasmodium protein, unknown function	1.06413	0.990303	√		transcribed						√	√	√	√						4	YES	YES
PF3D7_0612200	PFF0595c	leucine-rich repeat protein (LRR6)	-1.34176	0.987599											√	√				√	√	4	NO	YES
PF3D7_1361300	MAL13P1.305	conserved Plasmodium protein, unknown function	0.381143	0.98737					√				√		√	√						4	NO	YES
PF3D7_1207700	PFL0385c	blood stage antigen 41-3 precursor	-0.723453	0.954899					√				√		√	√						4	NO	YES
PF3D7_0715200	PF07_0061	conserved Plasmodium protein, unknown function	-1.48018	0.946039					√					√	√	√						4	NO	YES
PF3D7_0316100	PFC0701w	mitochondrial ribosomal protein L27 precursor, putative	-0.382164	0.926773									√	√	√	√						4	NO	YES
PF3D7_0311700	PFC0495w	plasmepsin VI	0.36147	0.896294									√	√	√	√						4	NO	YES
PF3D7_0924600	PFI1210w	conserved Plasmodium protein, unknown function	-0.278227	0.858579					√					√	√	√						4	NO	YES
PF3D7_0515500	PFE0775c	amino acid transporter, putative	0.539921	0.81972					√				√	√		√						4	NO	YES
PF3D7_1206500	PFL0325w	Tat binding protein 1(TBP-1)-interacting protein, putative	-0.145435	0.818543					√				√		√	√						4	NO	YES
PF3D7_1426500	PF14_0244	ABC transporter, (EPP family), putative	0.345604	0.780753	√		transcribed		√				√			√			√			4	YES	YES
PF3D7_1469900	PF14_0667	conserved Plasmodium protein, unknown function	-0.16272	0.760837					√						√	√			√			4	NO	YES
PF3D7_0510800	PFE0540w	conserved Plasmodium protein, unknown function	0.861385	0.758086	√		transcribed						√	√		√			√			4	YES	YES
PF3D7_1020200	PF10_0195	kinesin, putative	-0.014346	0.750889	√		transcribed		√				√		√	√						4	YES	YES
PF3D7_0728600	MAL7P1.155	zinc finger, C3HC4 type, putative	-0.108535	0.736236										√	√	√			√			4	NO	YES
PF3D7_0630200	PFF1465w	secreted ookinete protein, putative (PSOP6)	0.278314	0.728964									√	√	√	√						4	NO	YES
PF3D7_0408200	PFD0403w	conserved Plasmodium protein, unknown function	0.124275	0.725999										√	√	√			√			4	NO	YES
PF3D7_0830800	PF08_0002	surface-associated interspersed gene 8.2 (SURFIN8.2) (SURF8.2)	-0.131409	0.71838							√			√		√	√					4	NO	YES
PF3D7_0912700	PFI0620w	conserved Plasmodium protein, unknown function	-1.39447	0.715865									√	√	√	√						4	NO	YES
PF3D7_0805100	MAL8P1.137	conserved Plasmodium protein, unknown function	-0.361476	0.70214					√					√	√	√						4	NO	YES
PF3D7_0529400.2	PFE1465w-a	conserved Plasmodium protein, unknown function	-1.78917	0.699261											√	√		√	√			4	NO	YES
PF3D7_1369300	MAL13P1.350	conserved Plasmodium protein, unknown function	1.15288	0.684187	√		transcribed		√				√		√	√						4	YES	YES
PF3D7_1238600	PFL1870c	sphingomyelin phosphodiesterase, putative	-1.47713	0.681823											√	√		√	√			4	NO	YES
PF3D7_1476600	PF14_0736	Plasmodium exported protein, unknown function	-1.1793	0.676006							√		√		√	√						4	NO	YES
PF3D7_0830500	PF08_0003	tryptophan/threonine-rich antigen (TryThrA)	0.469023	0.672366				√								√		√	√			4	NO	YES
PF3D7_1247800	PFL2290w	dipeptidyl peptidase 2, putative (DPAP2)	0.510872	0.668585					√						√	√			√			4	NO	YES
PF3D7_0311400	PFC0485w	protein kinase, putative	0.0901625	0.650911	√		transcribed		√					√	√	√						4	YES	YES
PF3D7_1350000	MAL13P1.252	conserved Plasmodium protein, unknown function	1.23218	0.640124	√		transcribed						√		√	√			√			4	YES	YES
PF3D7_0823500	PF08_0033	membrane skeletal protein IMC1-related	0.960979	0.632931							√	√			√	√						4	NO	YES
PF3D7_0717000	MAL7P1.82	conserved Plasmodium membrane protein, unknown function	-0.510503	0.632898									√	√	√	√						4	NO	YES
PF3D7_1234700	PFL1675c	CPW-WPC family protein	0.48896	0.630834					√			√			√	√						4	NO	YES
PF3D7_1033900	PF10_0330	ubiquitin conjugating enzyme, putative	0.301881	0.616514											√	√		√	√			4	NO	YES
PF3D7_1410100	PF14_0099	alpha/beta hydrolase, putative	0.54601	0.613307					√				√			√			√			4	NO	YES
PF3D7_0911500.1	PFI0560c-a	conserved Plasmodium protein, unknown function	0.138486	0.598064									√	√	√	√						4	NO	YES
PF3D7_0311000	PFC0460w	conserved Plasmodium protein, unknown function	2.17081	0.592377	√		transcribed						√	√	√	√						4	YES	YES
PF3D7_1318400	MAL13P1.96	chromosome segregation protein, putative	-0.237058	0.591577											√	√			√	√		4	NO	YES
PF3D7_1236500	PFL1765c	conserved Plasmodium protein, unknown function	0.841733	0.588924	√		transcribed		√				√		√	√						4	YES	YES
PF3D7_1322900	MAL13P1.129	conserved Plasmodium protein, unknown function	1.00043	0.588802	√		transcribed		√				√		√	√						4	YES	YES
PF3D7_0824100	MAL8P1.35	exonuclease, putative	-0.119082	0.581307									√	√	√	√						4	NO	YES
PF3D7_1250100	PFL2405c	osmiophilic body protein (Pfg377)	1.28649	0.579455	√		transcribed		√						√	√			√			4	YES	YES
PF3D7_0615200	PFF0735w	conserved Plasmodium protein, unknown function	0.825476	0.573095	√		transcribed						√	√	√	√						4	YES	YES
PF3D7_1328600	MAL13P1.149	conserved Plasmodium protein, unknown function	0.535602	0.571705					√				√		√	√						4	NO	YES
PF3D7_1338800	MAL13P1.195	CPW-WPC family protein	1.06596	0.532725	√		transcribed		√				√		√	√						4	YES	YES
PF3D7_0723800	PF07_0101	conserved Plasmodium protein, unknown function	-1.3046	0.530828												√		√	√	√		4	NO	YES
PF3D7_0509700	PFE0480c	conserved Plasmodium protein, unknown function	0.279969	0.527834	√		transcribed						√	√	√	√						4	YES	YES
PF3D7_0625100	PFF1215w	sphingomyelin synthase, putative	1.21083	0.522647	√		transcribed		√				√	√		√						4	YES	YES
PF3D7_0926300	PFI1285w	protein kinase, putative	0.877379	0.512287					√				√	√		√						4	NO	YES
PF3D7_0318800	PFC0831w	triosephophate isomerase, putative	1.21347	0.51141	√		transcribed						√	√		√			√			4	YES	YES
PF3D7_1466000	PF14_0629	conserved Plasmodium protein, unknown function	0.874937	0.504923	√		transcribed		√				√		√	√						4	YES	YES
PF3D7_1363800	MAL13P1.320	conserved Plasmodium membrane protein, unknown function	1.12384	0.503894	√		transcribed						√		√	√			√			4	YES	YES
PF3D7_0316300.2	PFC0710w-a	inorganic pyrophosphatase, putative	-0.334201	0.495803											√	√		√	√			4	NO	YES
PF3D7_1010400	PF10_0101	conserved Plasmodium protein, unknown function	0.473062	0.491962	√		transcribed							√	√	√			√			4	YES	YES
PF3D7_0723100	PF07_0096	conserved Plasmodium protein, unknown function	0.396779	0.491517									√	√	√	√						4	NO	YES
PF3D7_0927500	PFI1350c	dynein light chain, putative	0.38071	0.484559									√	√		√			√			4	NO	YES
PF3D7_0305600	PFC0250c	AP endonuclease (DNA-[apurinic or apyrimidinic site] lyase), putative	-0.999385	0.475245										√	√	√			√			4	NO	YES
PF3D7_0705300	MAL7P1.21	origin recognition complex subunit 2, putative (ORC2)	-0.453816	0.465293												√			√	√	√	4	NO	YES
PF3D7_1227600	PFL1335w	cyclin related protein, putative	-1.83952	0.462608											√	√		√	√			4	NO	YES
PF3D7_1339000	MAL13P1.197	probable protein, unknown function	1.28231	0.461798	√		transcribed						√		√	√			√			4	YES	YES
PF3D7_0319400	PFC0860w	kinesin, putative	-0.062953	0.458739										√		√		√	√			4	NO	YES
PF3D7_1202300	PFL0115w	dynein heavy chain, putative	0.70844	0.455928	√		transcribed									√			√	√	√	4	YES	YES
PF3D7_0807400	MAL8P1.300	conserved Plasmodium protein, unknown function	-0.615665	0.453653									√	√	√	√						4	NO	YES
PF3D7_1403100	PF14_0031a	conserved Plasmodium protein, unknown function	-0.419381	0.447425											√	√				√	√	4	NO	YES
PF3D7_0503000	PFE0145w	organelle ribosomal protein L28 precursor, putative	0.447489	0.447022									√	√	√	√						4	NO	YES
PF3D7_1325400	MAL13P1.137	conserved Plasmodium protein, unknown function	-0.374259	0.446353											√	√				√	√	4	NO	YES
PF3D7_0215900	PFB0725c	zinc finger protein, putative	-1.26176	0.445312									√	√	√	√						4	NO	YES
PF3D7_1236300	PFL1755w	conserved Plasmodium protein, unknown function	-1.7709	0.444414											√	√		√	√			4	NO	YES
PF3D7_0104700	PFA0240w	transporter, putative	2.04055	0.440616	√		transcribed							√	√	√			√			4	YES	YES
PF3D7_1345000	MAL13P1.224	conserved Plasmodium protein, unknown function	0.620197	0.432719					√				√		√	√						4	NO	YES
PF3D7_1143700	PF11_0451	conserved Plasmodium protein, unknown function	0.10171	0.425836									√			√				√	√	4	NO	YES
PF3D7_0924900	PFI1220w	conserved protein, unknown function	0.605774	0.42561									√	√	√	√						4	NO	YES
PF3D7_1027700.1	PF10_0271	centrin-3 (CEN3)	-1.88283	0.425293									√		√	√		√				4	NO	YES
PF3D7_0728400.1	MAL7P1.154	conserved Plasmodium protein, unknown function	0.0847815	0.422147									√	√	√	√						4	NO	YES
PF3D7_1319000	PF13_0104	conserved Plasmodium protein, unknown function	0.21056	0.418844					√						√	√			√			4	NO	YES
PF3D7_0718000	MAL7P1.89	dynein heavy chain, putative	1.03995	0.414883	√		transcribed		√					√		√			√			4	YES	YES
PF3D7_0205100	PFB0227c	conserved Plasmodium protein, unknown function	0.790685	0.414006									√	√	√	√						4	NO	YES
PF3D7_1118800	PF11_0195	conserved Plasmodium protein, unknown function	1.01492	0.411639	√		transcribed		√				√		√	√						4	YES	YES
PF3D7_0213600	PFB0615c	conserved Plasmodium protein, unknown function	1.02873	0.402869	√		transcribed		√				√	√		√						4	YES	YES
PF3D7_1465800	PF14_0626	dynein beta chain, putative	0.672948	0.391526												√			√	√	√	4	NO	YES
PF3D7_0927700	PFI1360c	serine/threonine protein phosphatase, putative	0.773734	0.38889								√	√	√		√						4	NO	YES
PF3D7_0931600	PFI1535w	conserved Plasmodium protein, unknown function	0.526139	0.388107	√		transcribed						√	√		√			√			4	YES	YES
PF3D7_1201600	PFL0080c	NIMA related kinase 3 (NEK3)	-0.527126	0.381425					√				√		√	√						4	NO	YES
PF3D7_0521900	PFE1095w	conserved Plasmodium protein, unknown function	1.0697	0.379877	√		transcribed						√	√		√			√			4	YES	YES
PF3D7_1408800	PF14_0085	conserved Plasmodium protein, unknown function	2.39915	0.379155	√		transcribed									√			√	√	√	4	YES	YES
PF3D7_0510700	PFE0530w	conserved Plasmodium protein, unknown function	-0.220734	0.368678	√		transcribed						√	√	√	√						4	YES	YES
PF3D7_1122900	PF11_0240	dynein heavy chain, putative	1.71361	0.359977	√		transcribed									√			√	√	√	4	YES	YES
PF3D7_1025500	PF10_0250	conserved Plasmodium protein, unknown function	0.382211	0.35739											√	√				√	√	4	NO	YES
PF3D7_0614900	PFF0720w	conserved Plasmodium membrane protein, unknown function	0.0819765	0.356985										√	√	√			√			4	NO	YES
PF3D7_0913600	PFI0665w	conserved Plasmodium protein, unknown function	-0.40197	0.356419										√	√	√			√			4	NO	YES
PF3D7_0923100	PFI1135c	OTU-like cysteine protease, putative	0.5081	0.348848									√	√		√			√			4	NO	YES
PF3D7_0612500	PFF0605c	conserved Plasmodium protein, unknown function	0.24205	0.339194									√	√	√	√						4	NO	YES
PF3D7_0924000	PFI1180w	patatin-like phospholipase, putative	-1.1132	0.332493				√								√		√	√			4	NO	YES
PF3D7_1205500	PFL0275w	zinc finger protein, putative	-2.23803	0.307853												√		√	√	√		4	NO	YES
PF3D7_1329300	PF13_0149	chromatin assembly factor 1 subunit, putative	-1.01299	0.302586												√			√	√	√	4	NO	YES
PF3D7_1008600	PF10_0083	zinc finger C-x8-C-x5-C-x3-H type, putative	0.011868	0.289965									√	√	√	√						4	NO	YES
PF3D7_1347000	PF13_0250	G-beta repeat protein, putative	0.27701	0.287305					√				√			√			√			4	NO	YES
PF3D7_0606400	PFF0315c	conserved Plasmodium protein, unknown function	0.34756	0.286699									√	√	√	√						4	NO	YES
PF3D7_0728300	PF07_0119	conserved Plasmodium protein, unknown function	0.173608	0.286377					√				√	√		√						4	NO	YES
PF3D7_0404200	PFD0205c	conserved Plasmodium protein, unknown function	0.273897	0.280086									√	√	√	√						4	NO	YES
PF3D7_0112800	PFA0610c	Plasmodium exported protein (hyp11), unknown function	0.317127	0.279946									√	√	√	√						4	NO	YES
PF3D7_0730000	MAL7P1.163	conserved Plasmodium protein, unknown function	-0.5386	0.278496									√	√	√	√						4	NO	YES
PF3D7_0104200	PFA0210c	conserved Plasmodium protein, unknown function	-0.8921	0.277036				√								√		√	√			4	NO	YES
PF3D7_0107700	PFA0385w	conserved Plasmodium membrane protein, unknown function	-0.766366	0.263885									√	√	√	√						4	NO	YES
PF3D7_0806400	MAL8P1.133	glycosyltransferase family 28 protein, putative	0.246449	0.26356									√	√		√			√			4	NO	YES
PF3D7_1345400	MAL13P1.226	conserved Plasmodium protein, unknown function	-0.535906	0.262723												√			√	√	√	4	NO	YES
PF3D7_1120700	PF11_0214	conserved Plasmodium protein, unknown function	-0.296993	0.258045					√				√		√	√						4	NO	YES
PF3D7_0421800	PFD1006w	conserved Plasmodium protein, unknown function	2.7394	0.255816	√		transcribed						√	√	√	√						4	YES	YES
PF3D7_0411900	PFD0590c	DNA polymerase alpha	0.120563	0.253162												√			√	√	√	4	NO	YES
PF3D7_0205300	PFB0235w	conserved Plasmodium protein, unknown function	1.17004	0.24991	√		transcribed		√				√	√		√						4	YES	YES
PF3D7_0620700	PFF1010c	DnaJ protein, putative	0.118	0.249414									√	√	√	√						4	NO	YES
PF3D7_1338400	MAL13P1.191	conserved Plasmodium protein, unknown function	-0.253489	0.24612					√				√		√	√						4	NO	YES
PF3D7_1234300	PFL1655c	DNA polymerase epsilon subunit b, putative	-0.578816	0.244484												√			√	√	√	4	NO	YES
PF3D7_1403800	PF14_0035	nuclear formin-like protein (MISFIT)	-0.181357	0.241669												√			√	√	√	4	NO	YES
PF3D7_1416000	PF14_0158	conserved Plasmodium protein, unknown function	1.10644	0.236894	√		transcribed		√				√			√			√			4	YES	YES
PF3D7_1446700	PF14_0444	conserved Plasmodium protein, unknown function	-1.36036	0.23212												√		√	√	√		4	NO	YES
PF3D7_1139500.1	PF11_0405-a	AAA family ATPase, putative	1.58278	0.231101	√		transcribed						√		√	√			√			4	YES	YES
PF3D7_1319400	MAL13P1.103	conserved Plasmodium protein, unknown function	0.611459	0.210384												√			√	√	√	4	NO	YES
PF3D7_0932900	PFI1595c	conserved Plasmodium protein, unknown function	0.775815	0.208944									√	√		√			√			4	NO	YES
PF3D7_1128700	PF11_0298	GPI8p transamidase	-1.00715	0.197082					√				√			√			√			4	NO	YES
PF3D7_1304100	MAL13P1.22	DNA ligase I (LigI)	-2.16205	0.195751												√		√	√	√		4	NO	YES
PF3D7_1327600	PF13_0159	nicotinic acid mononucleotide adenyltransferase	-0.0992845	0.192155												√		√	√	√		4	NO	YES
PF3D7_1226800	PFL1295w	conserved Plasmodium protein, unknown function	-0.05254	0.190819												√			√	√	√	4	NO	YES
PF3D7_0511100	PFE0550w	conserved Plasmodium protein, unknown function	-0.953086	0.188965									√	√	√	√						4	NO	YES
PF3D7_1347800	MAL13P1.238	leucine-rich repeat protein (LRR4.1)	0.541985	0.178647									√		√	√			√			4	NO	YES
PF3D7_1120600	PF11_0213	conserved Plasmodium protein, unknown function	0.240611	0.165764												√			√	√	√	4	NO	YES
PF3D7_0423000	PFD1085w	conserved Plasmodium protein, unknown function	-0.649962	0.165469									√	√	√	√						4	NO	YES
PF3D7_0604900	PFF0240c	conserved Plasmodium protein, unknown function	-0.219816	0.143401									√	√	√	√						4	NO	YES
PF3D7_1147300	PF11_0482	conserved Plasmodium protein, unknown function	0.01754	0.136382											√	√		√	√			4	NO	YES
PF3D7_0515100	PFE0755c	rhomboid protease ROM9 (ROM9)	-0.17701	0.130875									√	√		√			√			4	NO	YES
PF3D7_0802700	MAL8P1.149	conserved Plasmodium protein, unknown function	1.0867	0.130761	√		transcribed		√					√		√			√			4	YES	YES
PF3D7_0935900	PFI1735c	ring-exported protein 1 (REX1)	0.553988	0.130236											√	√		√	√			4	NO	YES
PF3D7_0805800	MAL8P1.136	conserved Plasmodium protein, unknown function	-0.027421	0.129846									√	√	√	√						4	NO	YES
PF3D7_0509100	PFE0450w	chromosome condensation protein, putative	0.430516	0.125863												√			√	√	√	4	NO	YES
PF3D7_0810200	PF08_0098	ABC1 family, putative (ABCK1)	0.090162	0.124287										√		√		√	√			4	NO	YES
PF3D7_1345900	MAL13P1.229	conserved Plasmodium protein, unknown function	-0.260824	0.12341									√			√		√	√			4	NO	YES
PF3D7_1104500	PF11_0056	conserved Plasmodium protein, unknown function	1.32407	0.122535	√		transcribed		√				√			√			√			4	YES	YES
PF3D7_0937200	PFI1800w	lysophospholipase, putative	0.264222	0.119216									√	√		√		√				4	NO	YES
PF3D7_1214800	PFL0715w	conserved Plasmodium protein, unknown function	1.21395	0.111575	√		transcribed						√		√	√			√			4	YES	YES
PF3D7_0934400	PFI1665w	transcription factor with AP2 domain(s), putative (ApiAP2)	0.730117	0.109239									√	√	√	√						4	NO	YES
PF3D7_1018400	PF10_0178	conserved Plasmodium protein, unknown function	-0.625266	0.107013					√				√		√	√						4	NO	YES
PF3D7_0611100	PFF0545c	succinate dehydrogenase subunit 3, putative (SDH3)	-0.150543	0.102179									√	√	√	√						4	NO	YES
PF3D7_1245000	PFL2160c	conserved Plasmodium protein, unknown function	-0.195847	0.100696									√		√	√			√			4	NO	YES
PF3D7_0417900	PFD0870w	conserved Plasmodium protein, unknown function	1.15112	0.0999415	√		transcribed						√	√		√			√			4	YES	YES
PF3D7_1472800	PF14_0696	conserved Plasmodium protein, unknown function	-0.714794	0.093558									√		√	√		√				4	NO	YES
PF3D7_0729100	PF07_0120	conserved Plasmodium protein, unknown function	-1.23825	0.093538										√		√		√	√			4	NO	YES
PF3D7_0817800	PF08_0057	conserved Plasmodium protein, unknown function	0.0164005	0.0929175									√	√	√	√						4	NO	YES
PF3D7_0718900	MAL7P1.97	conserved Plasmodium protein, unknown function	2.36197	0.0907105	√		transcribed						√	√	√	√						4	YES	YES
PF3D7_1425500	PF14_0235	conserved Plasmodium protein, unknown function	-0.177372	0.0868815									√		√	√			√			4	NO	YES
PF3D7_0414000	PFD0685c	chromosome associated protein, putative	-0.413635	0.07488										√		√		√	√			4	NO	YES
PF3D7_1305200	PF13_0026	transcription factor with AP2 domain(s) (ApiAP2)	0.030657	0.074188								√	√		√	√						4	NO	YES
PF3D7_1015000	PF10_0147	FAD synthetase, putative	-0.052789	0.0712945									√			√		√	√			4	NO	YES
PF3D7_1246000	PFL2205w	conserved Plasmodium protein, unknown function	1.84486	0.0684285	√		transcribed	√					√		√	√						4	YES	YES
PF3D7_0822400	MAL8P1.47	conserved Plasmodium protein, unknown function	0.138464	0.0640765										√	√	√			√			4	NO	YES
PF3D7_0504300	PFE0210c	conserved Plasmodium protein, unknown function	0.619808	0.0636585									√	√	√	√						4	NO	YES
PF3D7_1214500	PFL0700w	conserved Plasmodium protein, unknown function	0.800434	0.0625025					√				√		√	√						4	NO	YES
PF3D7_1457800	PF14_0551	conserved Plasmodium protein, unknown function	-0.017939	0.0616415												√			√	√	√	4	NO	YES
PF3D7_0708000	MAL7P1.25	cytoskeleton associated protein, putative	-0.462618	0.056573					√					√		√			√			4	NO	YES
PF3D7_0916300	PFI0800c	conserved Plasmodium protein, unknown function	-0.677446	0.0534825									√	√	√	√						4	NO	YES
PF3D7_0607100	PFF0350w	MYND finger protein, putative	1.63156	0.04168	√		transcribed						√	√		√			√			4	YES	YES
PF3D7_0715700	PF07_0063	conserved Plasmodium protein, unknown function	0.254966	0.0262525									√	√	√	√						4	NO	YES
PF3D7_0518400	PFE0920c	cyclin (CYC3)	0.672265	0.0202665	√		transcribed						√	√	√	√						4	YES	YES
PF3D7_0828500	PF08_0009	translation initiation factor EIF-2b alpha subunit, putative	-1.08034	0.007577										√		√		√	√			4	NO	YES
PF3D7_1322300	PF13_0126	translation initiation factor EIF-2B subunit related	0.664248	0.005824												√			√	√	√	4	NO	YES
PF3D7_0309900	PFC0415c	conserved Plasmodium protein, unknown function	0.206473	0.0041145					√					√	√	√						4	NO	YES
PF3D7_0527600	PFE1375c	conserved Plasmodium protein, unknown function	-1.88928	0.0026055										√		√		√	√			4	NO	YES
PF3D7_0605000	PFF0245w	mitochondrial ribosomal protein L24 precursor, putative	0.207813	-0.005727									√	√	√	√						4	NO	YES
PF3D7_1203000	PFL0150w	origin recognition complex subunit 1 (ORC1)	-0.18062	-0.012392												√			√	√	√	4	NO	YES
PF3D7_0630300	PFF1470c	DNA polymerase epsilon, catalytic subunit a, putative	-0.0832155	-0.0181785												√			√	√	√	4	NO	YES
PF3D7_1212300	PFL0610w	conserved Plasmodium protein, unknown function	0.695115	-0.0186195												√			√	√	√	4	NO	YES
PF3D7_0911000	PFI0535w	phosphatidylinositol N-acetylglucosaminyltransferase, putative	0.0691725	-0.0232375									√	√	√	√						4	NO	YES
PF3D7_0803700	PF08_0125	tubulin gamma chain (g-tub)	-1.17544	-0.037104										√		√		√	√			4	NO	YES
PF3D7_0203300	PFB0160w	ERCC1 nucleotide excision repair protein, putative	-1.21385	-0.0484115									√	√	√	√						4	NO	YES
PF3D7_0308800	PFC0371w	conserved protein, unknown function	0.803058	-0.0548755									√	√	√	√						4	NO	YES
PF3D7_1440500	PF14_0384	allantoicase, putative	0.181267	-0.0633125												√		√	√	√		4	NO	YES
PF3D7_1135600	PF11_0368	conserved Plasmodium protein, unknown function	-0.0642615	-0.0675815												√			√	√	√	4	NO	YES
PF3D7_1412900.2	PF14_0128-b	non-canonical ubiquitin conjugating enzyme, putative	-0.352987	-0.079061									√			√		√	√			4	NO	YES
PF3D7_1013600	PF10_0133	conserved Plasmodium protein, unknown function	-0.612369	-0.0801375												√			√	√	√	4	NO	YES
PF3D7_0923500	PFI1155w	conserved Plasmodium protein, unknown function	-0.124331	-0.084421								√		√		√			√			4	NO	YES
PF3D7_0215800	PFB0720c	origin recognition complex subunit 5 (ORC5)	0.371039	-0.0897605												√			√	√	√	4	NO	YES
PF3D7_1406500	PF14_0062	conserved Plasmodium protein, unknown function	0.844294	-0.0903465												√			√	√	√	4	NO	YES
PF3D7_0619300	PFF0935c	conserved Plasmodium protein, unknown function	1.26186	-0.0935465	√		transcribed							√		√		√	√			4	YES	YES
PF3D7_0417500	PFD0850c-a	memo-like protein	-0.304844	-0.096481												√		√	√	√		4	NO	YES
PF3D7_0818500	PF08_0056	zinc finger protein, putative	-0.475789	-0.0968655				√								√		√	√			4	NO	YES
PF3D7_0716400	MAL7P1.78	conserved Plasmodium protein, unknown function	0.500408	-0.0985275									√	√	√	√						4	NO	YES
PF3D7_1429600	PF14_0275	conserved Plasmodium protein, unknown function (GEXP03)	-1.50028	-0.10086									√			√		√	√			4	NO	YES
PF3D7_1435100	PF14_0332	conserved Plasmodium protein, unknown function	-0.39805	-0.104428												√			√	√	√	4	NO	YES
PF3D7_0708900	PF07_0034	Cg3 protein	0.049026	-0.129159										√		√		√	√			4	NO	YES
PF3D7_1205700	PFL0285w	targeted glyoxalase II (tGloII)	-0.947952	-0.132124									√			√		√	√			4	NO	YES
PF3D7_1009300	PF10_0090	conserved Plasmodium protein, unknown function	0.136356	-0.133156									√	√		√		√				4	NO	YES
PF3D7_0613200	PFF0640w	conserved Plasmodium protein, unknown function	0.650788	-0.160234									√	√	√	√						4	NO	YES
PF3D7_1004900	PF10_0052	conserved Plasmodium protein, unknown function	0.597269	-0.163676									√	√	√	√						4	NO	YES
PF3D7_0714400	MAL7P1.69	calmodulin, putative	0.401308	-0.174763										√	√	√			√			4	NO	YES
PF3D7_0410400	PFD0515w	exosome complex component RRP4, putative (RRP4)	-0.0907895	-0.185407									√	√		√			√			4	NO	YES
PF3D7_0315500	PFC0675c	mitochondrial ribosomal protein L29/L47 precursor, putative	0.569216	-0.187694									√	√		√		√				4	NO	YES
PF3D7_1308100	PF13_0043	CCAAT-binding transcription factor, putative	-0.103004	-0.197179												√			√	√	√	4	NO	YES
PF3D7_0513400	PFE0665c	GTP binding protein, putative	-0.454191	-0.22248									√	√	√	√						4	NO	YES
PF3D7_0611900	PFF0580w	lsm12, putative	1.45806	-0.224439	√		transcribed						√	√	√	√						4	YES	YES
PF3D7_1463300	PF14_0602	DNA polymerase alpha subunit, putative	-0.188044	-0.233639												√		√	√	√		4	NO	YES
PF3D7_1414600	PF14_0144	RNA guanylyltransferase (Pgt1)	-1.18539	-0.23826											√	√		√	√			4	NO	YES
PF3D7_1346200	MAL13P1.232	mog1 homolog, putative	-0.509588	-0.248384									√			√		√	√			4	NO	YES
PF3D7_0405000	PFD0245c	ATP-dependent RNA helicase, putative	-0.250744	-0.252549										√		√		√	√			4	NO	YES
PF3D7_0507000	PFE0345c	conserved Plasmodium protein, unknown function	-1.07317	-0.252841									√	√	√	√						4	NO	YES
PF3D7_0624200	PFF1165c	conserved Plasmodium protein, unknown function	0.26982	-0.258683										√	√	√			√			4	NO	YES
PF3D7_0523500	PFE1173c	outer arm dynein lc3, putative	0.979919	-0.271095									√	√	√	√						4	NO	YES
PF3D7_0703000	PF07_0010	conserved Plasmodium protein, unknown function	-0.691418	-0.273134										√		√		√	√			4	NO	YES
PF3D7_0908400	PFI0405w	conserved Plasmodium protein, unknown function	-1.59718	-0.274927									√	√	√	√						4	NO	YES
PF3D7_0935500	PFI1715w	Plasmodium exported protein, unknown function (GEXP22)	0.819613	-0.275305										√		√		√	√			4	NO	YES
PF3D7_0726700	PF07_0109	conserved Plasmodium protein, unknown function	-1.47202	-0.288041									√	√	√	√						4	NO	YES
PF3D7_0512100	PFE0600c	conserved Plasmodium protein, unknown function	0.164715	-0.289879									√	√	√	√						4	NO	YES
PF3D7_0925800	PFI1265w	conserved Plasmodium protein, unknown function	-0.475658	-0.290693										√		√		√	√			4	NO	YES
PF3D7_0715400	MAL7P1.74	secreted ookinete protein, putative (PSOP20)	0.803434	-0.306885									√	√	√	√						4	NO	YES
PF3D7_1210300	PFL0515w	conserved Plasmodium protein, unknown function	-0.183049	-0.31361									√			√		√	√			4	NO	YES
PF3D7_0927000	PFI1325w	CS domain protein, putative	-0.06641	-0.322332									√	√	√	√						4	NO	YES
PF3D7_0618600	PFF0900c	rhomboid protease ROM10 (ROM10)	-1.07425	-0.330897									√	√		√			√			4	NO	YES
PF3D7_0807000	MAL8P1.131	gas41 homologue, putative	-1.11838	-0.332956									√			√		√	√			4	NO	YES
PF3D7_0825300	MAL8P1.26	conserved protein, unknown function	0.177343	-0.343145									√	√	√	√						4	NO	YES
PF3D7_1453600	PF14_0509	RAP protein, putative	0.219944	-0.353809									√			√				√	√	4	NO	YES
PF3D7_0616200	PFF0785w	Ndc80 homologue, putative	-0.52893	-0.382636											√	√		√	√			4	NO	YES
PF3D7_0907800	PFI0375w	apicoplast ribosomal protein L35 precursor, putative	-1.72003	-0.384233									√	√	√	√						4	NO	YES
PF3D7_0424600	PFD1170c	Plasmodium exported protein (PHISTb), unknown function	-0.799053	-0.391104											√	√		√	√			4	NO	YES
PF3D7_1342300	PF13_0231	tetratricopeptide repeat family protein, putative	1.36371	-0.416179	√		transcribed						√			√		√	√			4	YES	YES
PF3D7_0801800	MAL8P1.156	mannose-6-phosphate isomerase, putative	0.572775	-0.420038												√		√	√	√		4	NO	YES
PF3D7_1472000	PF14_0688	pre-mRNA-splicing factor ISY1 homolog, putative	-0.737391	-0.425227									√			√		√	√			4	NO	YES
PF3D7_0615700	PFF0760w	RNA and export factor binding protein, putative	-0.685394	-0.425411									√	√		√			√			4	NO	YES
PF3D7_0724500	MAL7P1.131	conserved Plasmodium protein, unknown function	0.105867	-0.427236												√			√	√	√	4	NO	YES
PF3D7_0709800	MAL7P1.29a	conserved Plasmodium protein, unknown function	1.1248	-0.429315	√		transcribed						√	√	√	√						4	YES	YES
PF3D7_1449800	PF14_0474	conserved Plasmodium protein, unknown function	-0.0764635	-0.442538												√			√	√	√	4	NO	YES
PF3D7_0931200	PFI1515w	unspecified product (Sel2)	-1.31951	-0.44299									√	√		√			√			4	NO	YES
PF3D7_0621500	PFF1040w	conserved Plasmodium protein, unknown function	-0.28045	-0.451358									√	√		√		√				4	NO	YES
PF3D7_0809500	MAL8P1.114	conserved Plasmodium protein, unknown function	0.003651	-0.454275									√	√	√	√						4	NO	YES
PF3D7_1139300	PF11_0404	transcription factor with AP2 domain(s) (ApiAP2)	-0.427168	-0.457217											√	√		√	√			4	NO	YES
PF3D7_0919600	PFI0960w	dolichyl-diphosphooligosaccharide-protein glycosyltransferase, putative	1.29692	-0.483853	√		transcribed						√	√		√			√			4	YES	YES
PF3D7_0205400	PFB0240w	conserved Plasmodium protein, unknown function	-0.889041	-0.508441										√		√		√	√			4	NO	YES
PF3D7_0818400	MAL8P1.67	nucleolar preribosomal assembly protein, putative (UTP24)	1.14893	-0.519833	√		transcribed						√	√	√	√						4	YES	YES
PF3D7_1356700	MAL13P1.277	DnaJ protein, putative	-1.50086	-0.522875									√			√		√	√			4	NO	YES
PF3D7_1456300	PF14_0536	conserved Plasmodium protein, unknown function	0.868486	-0.530358									√			√		√	√			4	NO	YES
PF3D7_0217400	PFB0810w	conserved Plasmodium protein, unknown function	0.526014	-0.553174									√	√	√	√						4	NO	YES
PF3D7_0209300	PFB0420w	2C-methyl-D-erythritol 2,4-cyclodiphosphate synthase (IspF)	0.969527	-0.561467										√		√		√	√			4	NO	YES
PF3D7_0615000	PFF0725w	conserved Plasmodium protein, unknown function	0.784831	-0.568091									√	√	√	√						4	NO	YES
PF3D7_1313900	MAL13P1.71	conserved Plasmodium protein, unknown function	-1.0715	-0.573883									√			√		√	√			4	NO	YES
PF3D7_1253000	PFL2550w	gametocyte erythrocyte cytosolic protein (GECO)	0.123873	-0.603273							√					√		√	√			4	NO	YES
PF3D7_1126400	PF11_0274	large ribosomal subunit processing factor, putative	-0.815733	-0.608456									√		√	√		√				4	NO	YES
PF3D7_1201500	PFL0075w	XPA binding protein 1, putative	0.294379	-0.608866												√		√	√	√		4	NO	YES
PF3D7_0731100	MAL7P1.172	Plasmodium exported protein (PHISTc), unknown function (GEXP11)	0.0770435	-0.620895				√								√		√	√			4	NO	YES
PF3D7_0404600	PFD0225w	conserved Plasmodium membrane protein, unknown function	0.0359435	-0.625725										√		√				√	√	4	NO	YES
PF3D7_0419200	PFD0930w	CGI-141 protein homolog, putative	-1.70587	-0.626184									√	√		√			√			4	NO	YES
PF3D7_0322400	PFC1000w	regulator of initiation factor 2 (eIF2)	0.800727	-0.638389										√		√		√	√			4	NO	YES
PF3D7_0407400	PFD0365c	conserved Plasmodium protein, unknown function	0.477317	-0.663123									√	√	√	√						4	NO	YES
PF3D7_1470300	PF14_0670	conserved Plasmodium protein, unknown function	-0.498655	-0.671127									√		√	√			√			4	NO	YES
PF3D7_0208700.1	PFB0391c-a	conserved Plasmodium protein, unknown function	0.389799	-0.676426									√	√		√			√			4	NO	YES
PF3D7_0618700	PFF0905w	transport protein particle (TRAPP) component, putative	0.800202	-0.679528										√		√		√	√			4	NO	YES
PF3D7_1212500	PFL0620c	glycerol-3-phosphate acyltransferase (Gatp)	0.349923	-0.688491												√		√	√	√		4	NO	YES
PF3D7_1124000	PF11_0251	endoplasmic reticulum oxidoreductin, putative	-0.346063	-0.697262									√			√		√	√			4	NO	YES
PF3D7_0807200	MAL8P1.130	conserved Plasmodium membrane protein, unknown function	-1.79706	-0.704167									√	√		√			√			4	NO	YES
PF3D7_0713500	MAL7P1.65	conserved Plasmodium protein, unknown function	0.190032	-0.761143												√			√	√	√	4	NO	YES
PF3D7_0528800	PFE1435c	nucleolar preribosomal GTPase, putative	0.0082225	-0.784609										√	√	√			√			4	NO	YES
PF3D7_1447900	PF14_0455	multidrug resistance protein 2 (heavy metal transport family) (MDR2)	-1.07432	-0.801527												√		√	√	√		4	NO	YES
PF3D7_0513500	PFE0670w	mitochondrial matrix protein, putative	0.0695735	-0.804731									√	√	√	√						4	NO	YES
PF3D7_0903000	PFI0145w	conserved protein, unknown function	1.08618	-0.825337	√		transcribed						√	√		√			√			4	YES	YES
PF3D7_0703100	PF07_0011	conserved Plasmodium protein, unknown function	-0.485128	-0.830041									√	√		√			√			4	NO	YES
PF3D7_0801000	PF08_0137	Plasmodium exported protein (PHISTc), unknown function	-0.987457	-0.842654											√	√		√	√			4	NO	YES
PF3D7_1362300	PF13_0331	conserved protein, unknown function	-1.55859	-0.849312												√		√	√	√		4	NO	YES
PF3D7_0411100	PFD0550c	conserved Plasmodium protein, unknown function	0.989513	-0.969197										√		√		√	√			4	NO	YES
PF3D7_1124400	PF11_0255	U6 snRNA-associated Sm-like protein LSm1, putative (LSM1)	1.5721	-0.987964	√		transcribed						√		√	√			√			4	YES	YES
PF3D7_0506000	PFE0295w	conserved Plasmodium protein, unknown function	-1.18231	-0.994703										√		√		√	√			4	NO	YES
PF3D7_0936000	PFI1740c-a	ring-exported protein 2 (REX2)	0.150662	-1.01289											√	√		√	√			4	NO	YES
PF3D7_0210100.1	PFB0455w-a	60S ribosomal protein L37ae, putative	-2.07957	-1.06007									√			√		√	√			4	NO	YES
PF3D7_0709000	MAL7P1.27	chloroquine resistance transporter (CRT)	-0.815743	-1.0637												√		√	√	√		4	NO	YES
PF3D7_0919300	PFI0945w	thioredoxin, putative	-0.547455	2.19567		√	stabilized							√	√	√						3	YES	YES
PF3D7_1351700	MAL13P1.260	alveolin, putative (ALV6)	-3.0641	2.04803		√	stabilized	√							√	√						3	YES	YES
PF3D7_0808200	PF08_0108	plasmepsin X	-1.07961	1.97221		√	stabilized								√	√			√			3	YES	YES
PF3D7_1017500	PF10_0170	conserved Plasmodium protein, unknown function	-2.93532	1.72469		√	stabilized						√		√	√						3	YES	YES
PF3D7_0212600	PFB0570w	secreted protein altered thrombospondin repeat protein (SPATR)	-0.90129	1.59004		√	stabilized	√							√	√						3	YES	YES
PF3D7_1423300	PF14_0224	serine/threonine protein phosphatase (PP7)	-3.39438	1.57895		√	stabilized								√	√			√			3	YES	YES
PF3D7_1125800	PF11_0268	kelch protein, putative	0.269338	1.57092		√	stabilized	√							√	√						3	YES	YES
PF3D7_0206200	PFB0275w	metabolite/drug transporter, putative	-0.913868	1.5486		√	stabilized								√	√			√			3	YES	YES
PF3D7_1345600	MAL13P1.228	conserved Plasmodium protein, unknown function	-1.67292	1.43682		√	stabilized								√	√		√				3	YES	YES
PF3D7_0916000	PFI0785c	sugar transporter, putative	-2.2599	1.28997		√	stabilized							√	√	√						3	YES	YES
PF3D7_0209500	PFB0425c	conserved Plasmodium protein, unknown function	-0.0914985	1.27838		√	stabilized							√	√	√						3	YES	YES
PF3D7_0909500	PFI0460w	subpellicular microtubule protein 1, putative (SPM1)	-1.1825	1.19744		√	stabilized		√						√	√						3	YES	YES
PF3D7_0905400	PFI0265c	high molecular weight rhoptry protein 3 (RhopH3)	-1.73834	1.15519		√	stabilized								√	√		√				3	YES	YES
PF3D7_1434400	PF14_0325	conserved Plasmodium membrane protein, unknown function	-0.600936	1.09919		√	stabilized	√							√	√						3	YES	YES
PF3D7_1323700	MAL13P1.130	glideosome associated protein with multiple membrane spans 1 (GAPM1)	-0.972333	0.995439												√		√	√			3	NO	YES
PF3D7_1216600	PFL0800c	cell traversal protein for ookinetes and sporozoites (CelTOS)	0.684047	0.98898									√		√	√						3	NO	YES
PF3D7_0931300	PFI1520w	asparagine-rich antigen, putative	0.354495	0.984159									√	√		√						3	NO	YES
PF3D7_1436600	PF14_0346	cGMP-dependent protein kinase (PKG)	-2.55176	0.95334												√		√	√			3	NO	YES
PF3D7_1107100	PF11_0083	nucleic acid binding protein, putative	-1.71757	0.909199											√	√			√			3	NO	YES
PF3D7_1416500	PF14_0164	NADP-specific glutamate dehydrogenase (GDHa)	-2.58753	0.873532												√		√	√			3	NO	YES
PF3D7_0207100	PFB0315w	conserved Plasmodium protein, unknown function	-0.225161	0.860638											√	√			√			3	NO	YES
PF3D7_0810300	MAL8P1.109	protein phosphatase, putative	-0.622471	0.841962											√	√			√			3	NO	YES
PF3D7_0617900	PFF0865w	histone H3 variant, putative (H3.3)	-0.249229	0.829243												√		√	√			3	NO	YES
PF3D7_1415700	PF14_0155	serine C-palmitoyltransferase, putative	-0.448598	0.746679					√				√			√						3	NO	YES
PF3D7_1439400	PF14_0373	ubiquinol-cytochrome c reductase iron-sulfur subunit, putative	-1.40654	0.745322												√		√	√			3	NO	YES
PF3D7_0318500	PFC0820w	conserved Plasmodium protein, unknown function	-0.500544	0.73475										√	√	√						3	NO	YES
PF3D7_0814600	PF08_0073	conserved Plasmodium protein, unknown function	0.329761	0.730391	√		transcribed							√	√	√						3	YES	YES
PF3D7_0306400	PFC0275w	FAD-dependent glycerol-3-phosphate dehydrogenase, putative	-1.36124	0.703492												√		√	√			3	NO	YES
PF3D7_1447500	PF14_0452	conserved Plasmodium protein, unknown function	0.948219	0.697381									√		√	√						3	NO	YES
PF3D7_0311300	PFC0475c	phosphatidylinositol 3- and 4-kinase, putative	-0.669139	0.678539												√		√	√			3	NO	YES
PF3D7_0501600	PFE0080c	rhoptry-associated protein 2 (RAP2)	-3.90413	0.653594												√		√	√			3	NO	YES
PF3D7_1422900	PF14_0220	conserved Plasmodium protein, unknown function	0.10765	0.638346									√		√	√						3	NO	YES
PF3D7_1471400	PF14_0681	diacylglycerol kinase, putative	-0.996328	0.633834											√	√			√			3	NO	YES
PF3D7_1117900	PF11_0185	conserved Plasmodium protein, unknown function	-0.884872	0.633753									√			√		√				3	NO	YES
PF3D7_0818600	MAL8P1.66	conserved Plasmodium protein, unknown function	0.566901	0.618766										√	√	√						3	NO	YES
PF3D7_1141200	PF11_0423	conserved Plasmodium protein, unknown function	-0.0602685	0.618398									√			√			√			3	NO	YES
PF3D7_1350900	PF13_0267	transcription factor with AP2 domain(s) (ApiAP2)	-0.514667	0.609015									√		√	√						3	NO	YES
PF3D7_1342100	PF13_0229	aconitase	-1.81563	0.601647												√		√	√			3	NO	YES
PF3D7_0717500	PF07_0072	calcium dependent protein kinase 4 (CDPK4)	-1.4449	0.596212												√		√	√			3	NO	YES
PF3D7_0105400.1	PFA0265c	conserved Plasmodium protein, unknown function	-0.286493	0.592376									√	√		√						3	NO	YES
PF3D7_1420200	PF14_0196	tetratricopeptide repeat family protein, putative	-1.45704	0.590628				√								√			√			3	NO	YES
PF3D7_1437700	PF14_0357	succinyl CoA ligase, putative	-0.710797	0.582152												√		√	√			3	NO	YES
PF3D7_1028800	PF10_0282	conserved Plasmodium protein, unknown function	-0.88981	0.581242									√		√	√						3	NO	YES
PF3D7_1146500	PF11_0476	leucine-rich repeat protein (LRR10)	1.36494	0.561039	√		transcribed						√			√			√			3	YES	YES
PF3D7_1235100	PFL1695c	conserved Plasmodium protein, unknown function	-0.0474935	0.557031									√		√	√						3	NO	YES
PF3D7_0528400	PFE1415w	cell cycle regulator with zn-finger domain, putative	-0.030923	0.55354										√	√	√						3	NO	YES
PF3D7_1328300	PF13_0154	conserved Plasmodium protein, unknown function	-2.8254	0.541495												√		√	√			3	NO	YES
PF3D7_1462700	PF14_0597	cytochrome c1 precursor, putative	-1.62031	0.5366												√		√	√			3	NO	YES
PF3D7_0829400	MAL8P1.8	prolyl 4-hydroxylase alpha subunit 1, putative	-0.798834	0.528559										√	√	√						3	NO	YES
PF3D7_0805700	MAL8P1.203	serine/threonine protein kinase, FIKK family (TSTK0)	-1.76628	0.521767								√			√	√						3	NO	YES
PF3D7_0408500	PFD0420c	flap endonuclease 1 (FEN1)	-0.0592115	0.508307											√	√			√			3	NO	YES
PF3D7_1202200	PFL0110c	mitochondrial phosphate carrier protein (MPC)	-0.5983	0.477605												√		√	√			3	NO	YES
PF3D7_0414600	PFD0705c	conserved protein, unknown function	-0.306197	0.469723										√	√	√						3	NO	YES
PF3D7_1113000	PF11_0528	conserved Plasmodium protein, unknown function	-1.17684	0.461449												√				√	√	3	NO	YES
PF3D7_1008700	PF10_0084	tubulin beta chain	-0.346835	0.444522												√		√	√			3	NO	YES
PF3D7_1356300	PF13_0301	ubiquitin conjugating enzyme, putative	-1.7187	0.442964												√		√	√			3	NO	YES
PF3D7_0211500	PFB0510w	GAF domain-related protein, putative	0.212503	0.438497										√		√			√			3	NO	YES
PF3D7_0611800	PFF0575c	conserved Plasmodium protein, unknown function	-1.74699	0.432759										√		√		√				3	NO	YES
PF3D7_0801900	MAL8P1.154	conserved Plasmodium protein, unknown function	-0.161662	0.430697										√		√	√					3	NO	YES
PF3D7_1217900	PFL0865w	conserved protein, unknown function	-0.063646	0.430144												√		√	√			3	NO	YES
PF3D7_1224500	PFL1180w	chromatin assembly protein (ASF1), putative	-2.70564	0.426307												√		√	√			3	NO	YES
PF3D7_0530100	PFE1505w	SNARE protein, putative (SYN6)	0.127862	0.425767										√		√			√			3	NO	YES
PF3D7_0616500	PFF0800w	TRAP-like protein (TLP)	1.12101	0.419266	√		transcribed							√	√	√						3	YES	YES
PF3D7_0416400	PFD0795w	histone acetyltransferase, putative (HAT1)	-0.470399	0.409092											√	√			√			3	NO	YES
PF3D7_1230300	PFL1460c	subpellicular microtubule protein 2, putative (SPM2)	-0.007619	0.405417									√		√	√						3	NO	YES
PF3D7_1128200	PF11_0293	multiprotein bridging factor type 1, putative	1.69179	0.404707	√		transcribed						√			√			√			3	YES	YES
PF3D7_1213400	PFL0650c	conserved Plasmodium protein, unknown function	1.16919	0.38747	√		transcribed						√		√	√						3	YES	YES
PF3D7_0408700	PFD0430c	perforin like protein 1 (SPECT2)	2.03087	0.37507	√		transcribed						√	√		√						3	YES	YES
PF3D7_1322400	MAL13P1.125	conserved Plasmodium protein, unknown function	1.3747	0.366697	√		transcribed						√		√	√						3	YES	YES
PF3D7_1138500	PF11_0396	protein phosphatase 2c	-2.16931	0.359801												√		√	√			3	NO	YES
PF3D7_1466100	PF14_0630	protein serine/threonine phosphatase	-1.64664	0.358373												√				√	√	3	NO	YES
PF3D7_1243500	PFL2090c	endosome sorting protein (SNF7 homologue), putative	-2.1012	0.357637									√		√	√						3	NO	YES
PF3D7_0821400	MAL8P1.52	conserved Plasmodium protein, unknown function	-3.69461	0.343009									√	√		√						3	NO	YES
PF3D7_1361700	PF13_0327	cytochrome c oxidase subunit 2, putative	-1.26262	0.342113									√			√			√			3	NO	YES
PF3D7_0107300	PFA0360c	probable protein, unknown function	0.0413805	0.334692										√	√	√						3	NO	YES
PF3D7_0728200	MAL7P1.153	actin-like protein, putative	0.576285	0.33457										√		√			√			3	NO	YES
PF3D7_0609800	PFF0485c	zinc finger protein, putative	-1.10298	0.33311								√			√	√						3	NO	YES
PF3D7_0104000	PFA0200w	thrombospondin-related sporozoite protein (TRSP)	1.43852	0.332179	√		transcribed						√	√		√						3	YES	YES
PF3D7_1219700	PFL0955c	raf kinase inhibitor (RKIP)	0.883415	0.324132	√		transcribed						√		√	√						3	YES	YES
PF3D7_1234900	PFL1685w	conserved Plasmodium protein, unknown function	-0.755393	0.322162									√		√	√						3	NO	YES
PF3D7_0909200	PFI0445c	conserved Plasmodium protein, unknown function	0.01382	0.316129									√	√		√						3	NO	YES
PF3D7_1410700	PF14_0105	conserved Plasmodium protein, unknown function	-1.41489	0.310154												√		√	√			3	NO	YES
PF3D7_1235700	PFL1725w	ATP synthase subunit beta, mitochondrial	-0.114644	0.309119												√		√	√			3	NO	YES
PF3D7_0215200	PFB0690w	conserved Plasmodium protein, unknown function	0.592198	0.309114										√	√	√						3	NO	YES
PF3D7_1007800	PF10_0076	conserved Plasmodium protein, unknown function	1.45793	0.303302	√		transcribed							√		√			√			3	YES	YES
PF3D7_0409000	PFD0445c	conserved Plasmodium protein, unknown function	0.731777	0.302132										√		√			√			3	NO	YES
PF3D7_0506500	PFE0320w	conserved Plasmodium protein, unknown function	-0.460384	0.298355										√	√	√						3	NO	YES
PF3D7_0524600	PFE1225w	organelle ribosomal protein L7/L12 precursor, putative	-0.993204	0.296795									√	√		√						3	NO	YES
PF3D7_1439700	PF14_0376	leucine carboxyl methyltransferase, putative	0.467585	0.291998												√		√	√			3	NO	YES
PF3D7_1338700	MAL13P1.194	conserved Plasmodium protein, unknown function	-1.0122	0.28693											√	√			√			3	NO	YES
PF3D7_0820700	PF08_0045	2-oxoglutarate dehydrogenase E1 component	-0.77479	0.283872												√		√	√			3	NO	YES
PF3D7_1023100	PF10_0224	dynein heavy chain, putative	1.47144	0.271094	√		transcribed								√	√			√			3	YES	YES
PF3D7_0925500	PFI1250w	thioredoxin-like protein 2 (TLP2)	-0.984848	0.269225									√	√		√						3	NO	YES
PF3D7_0821000	MAL8P1.53	conserved Plasmodium protein, unknown function	-2.11711	0.263214												√		√	√			3	NO	YES
PF3D7_0513100	PFE0650c	conserved Plasmodium protein, unknown function	-2.78964	0.262351									√	√		√						3	NO	YES
PF3D7_1108800	PF11_0100	conserved Plasmodium protein, unknown function	-0.408695	0.260461									√			√			√			3	NO	YES
PF3D7_1124500	PF11_0256	pyruvate dehydrogenase E1 alpha subunit (pdhA)	-0.0427925	0.254827					√						√	√						3	NO	YES
PF3D7_1441700	PF14_0396	conserved Plasmodium protein, unknown function	0.239098	0.242019									√			√			√			3	NO	YES
PF3D7_1025600	PF10_0252	cytochrome c oxidase copper chaperone, putative	0.428585	0.236026									√		√	√						3	NO	YES
PF3D7_0730500	MAL7P1.167	conserved Plasmodium protein, unknown function	-0.532133	0.234493				√						√		√						3	NO	YES
PF3D7_1349600	MAL13P1.250	conserved Plasmodium protein, unknown function	-0.315045	0.226448												√		√	√			3	NO	YES
PF3D7_0904900	PFI0240c	Cu2 -transporting ATPase, putative (CUP)	-0.72552	0.225163												√		√	√			3	NO	YES
PF3D7_1463200	PF14_0601	replication factor C3 (RFC3)	0.028457	0.222481												√		√	√			3	NO	YES
PF3D7_0924300	PFI1195c	thiamine pyrophosphokinase (TPK)	-0.131238	0.197675										√		√			√			3	NO	YES
PF3D7_0710200	PF07_0042	conserved Plasmodium protein, unknown function	-0.273448	0.193995										√	√	√						3	NO	YES
PF3D7_1146600	PF11_0477	CCAAT-box DNA binding protein subunit B	-0.824034	0.18618				√							√	√						3	NO	YES
PF3D7_1467900	PF14_0647	rab GTPase activator, putative	-0.94654	0.176122												√		√	√			3	NO	YES
PF3D7_1024500	PF10_0238	conserved Plasmodium protein, unknown function	-1.2018	0.173089												√		√	√			3	NO	YES
PF3D7_1145400	PF11_0465	dynamin-like protein (DYN1)	-1.96994	0.170558												√		√	√			3	NO	YES
PF3D7_0323700	PFC1060c	U4/U6.U5 tri-snRNP-associated protein 1, putative (SART1)	-0.598699	0.166313												√		√	√			3	NO	YES
PF3D7_0217100	PFB0795w	ATP synthase F1, alpha subunit	0.216519	0.158045												√		√	√			3	NO	YES
PF3D7_1218900	PFL0920c	conserved Plasmodium protein, unknown function	-0.311419	0.155622									√			√			√			3	NO	YES
PF3D7_1117100	PF11_0177	deubiquinating/deneddylating enzyme (UCH54)	-1.31046	0.153782												√		√	√			3	NO	YES
PF3D7_0514100	PFE0705c	helicase, belonging to UvrD family, putative	-0.0858455	0.152384										√		√			√			3	NO	YES
PF3D7_0626400	PFF1280w	Sec14 domain containing protein	-0.13834	0.151955										√	√	√						3	NO	YES
PF3D7_0620000	PFF0975c	conserved Plasmodium protein, unknown function	0.752884	0.140773	√		transcribed							√	√	√						3	YES	YES
PF3D7_1312900	MAL13P1.63	eukaryotic translation initation factor 4 gamma, putative (EIF4G)	-1.22064	0.140709												√		√	√			3	NO	YES
PF3D7_1415300	PF14_0151	RNA-binding protein Nova-1, putative	0.771089	0.136608												√		√	√			3	NO	YES
PF3D7_0806500	PF08_0115	DnaJ protein, putative	-0.675844	0.132737				√								√			√			3	NO	YES
PF3D7_1248600	PFL2330w	conserved Plasmodium protein, unknown function	-0.588561	0.122571												√		√	√			3	NO	YES
PF3D7_0717800	PF07_0074	conserved Plasmodium protein, unknown function	1.63065	0.121405	√		transcribed							√	√	√						3	YES	YES
PF3D7_0613500	PFF0655c	adapter-related protein, putative	-0.774438	0.115673										√		√			√			3	NO	YES
PF3D7_0930900	PFI1835c	NifU-like protein, putative	1.34983	0.104085	√		transcribed						√	√		√						3	YES	YES
PF3D7_0907400	PFI0355c	ATP-dependent protease ATPase subunit ClpY (ClpY)	-1.38451	0.098336												√		√	√			3	NO	YES
PF3D7_1430700	PF14_0286	glutamate dehydrogenase, putative (GDHb)	1.32377	0.094124	√		transcribed									√		√	√			3	YES	YES
PF3D7_1437000	PF14_0350	N-acetyltransferase, putative	-1.37955	0.086349												√		√	√			3	NO	YES
PF3D7_1208900	PFL0445w	conserved Plasmodium protein, unknown function	-1.85246	0.083779												√		√	√			3	NO	YES
PF3D7_1127200	PF11_0283	conserved Plasmodium protein, unknown function	1.66937	0.082827	√		transcribed						√		√	√						3	YES	YES
PF3D7_1034700	PF10_0337	ADP-ribosylation factor, putative	-1.98194	0.0802795												√		√	√			3	NO	YES
PF3D7_0707700	PF07_0026	ubiquitin-protein ligase e3, putative	-1.70174	0.0742835												√		√	√			3	NO	YES
PF3D7_0606800	PFF0335c	probable protein, unknown function	0.101543	0.07314										√		√		√				3	NO	YES
PF3D7_0610200	PFF0505c	conserved Plasmodium protein, unknown function	0.0305425	0.0689175												√		√	√			3	NO	YES
PF3D7_1426700	PF14_0246	phosphoenolpyruvate carboxylase, putative (PEPC)	-0.912565	0.05862												√		√	√			3	NO	YES
PF3D7_1115600	PF11_0164	peptidyl-prolyl cis-trans isomerase (CYP19B)	-1.84814	0.054952												√		√	√			3	NO	YES
PF3D7_1206800	PFL0340w	conserved Plasmodium protein, unknown function	-1.6575	0.04686												√		√	√			3	NO	YES
PF3D7_1121100	PF11_0218	conserved Plasmodium protein, unknown function	-0.850309	0.041383												√		√	√			3	NO	YES
PF3D7_1004000	PF10_0043	60S ribosomal protein L13, putative	-0.545669	0.036444												√		√	√			3	NO	YES
PF3D7_1223800	PFL1145w	mitochondrial carrier protein, putative	-0.365293	0.0339615									√			√			√			3	NO	YES
PF3D7_1472200	PF14_0690	histone deacetylase, putative	0.303441	0.032413												√		√	√			3	NO	YES
PF3D7_0813200	MAL8P1.96	CS domain protein, putative	0.337415	0.0307245												√		√	√			3	NO	YES
PF3D7_0926400	PFI1295c	monocarboxylate transporter, putative	-1.152	0.027016										√	√	√						3	NO	YES
PF3D7_1134100	PF11_0352	protein disulfide isomerase (PDI-11)	-0.348795	0.0216095												√		√	√			3	NO	YES
PF3D7_0523400	PFE1170w	DnaJ protein, putative	-2.24457	0.021455												√		√	√			3	NO	YES
PF3D7_1125100	PF11_0262	vacuolar membrane protein-related, putative	-0.035979	0.017719												√		√	√			3	NO	YES
PF3D7_1108600	PF11_0098	endoplasmic reticulum-resident calcium binding protein (ERC)	-1.98554	0.015728												√		√	√			3	NO	YES
PF3D7_1237400	PFL1810w	conserved Plasmodium protein, unknown function	-1.94588	0.015558												√		√	√			3	NO	YES
PF3D7_0217900	PFB0835c	conserved Plasmodium protein, unknown function	-1.19234	0.014363												√		√	√			3	NO	YES
PF3D7_1339900	PF13_0218	ABC transporter (MDR family), putative (MDR5)	-1.07537	0.009382												√		√	√			3	NO	YES
PF3D7_0306600	PFC0281w	conserved Plasmodium protein, unknown function	-0.708619	0.0087655									√	√		√						3	NO	YES
PF3D7_0409500	PFD0465c	conserved Plasmodium protein, unknown function	-0.865773	0.005261										√		√			√			3	NO	YES
PF3D7_1132000	PF11_0329	ubiquitin-like protein, putative	-2.22827	0.00516												√		√	√			3	NO	YES
PF3D7_1020800	PF10_0407	dihydrolipoamide acyltransferase component E2 (DLAT)	-0.012101	0.0038865									√		√	√						3	NO	YES
PF3D7_1414000	PF14_0138	conserved protein, unknown function	0.872826	-0.0015445												√		√	√			3	NO	YES
PF3D7_1313700	MAL13P1.69	septum formation protein MAF homologue, putative	-0.777907	-0.010179												√		√	√			3	NO	YES
PF3D7_1023900	PF10_0232	chromodomain-helicase-DNA-binding protein 1 homolog, putative (CHD1)	-0.752502	-0.010775												√		√	√			3	NO	YES
PF3D7_1320800	PF13_0121	dihydrolipamide succinyltransferase component of 2-oxoglutarate dehydrogenase complex	0.666513	-0.0121515												√		√	√			3	NO	YES
PF3D7_1405600	PF14_0053	ribonucleotide reductase small subunit (RNR)	-1.13719	-0.0154265												√		√	√			3	NO	YES
PF3D7_0909700	PFI0470w	FHA domain protein, putative	-1.59883	-0.0179165										√		√		√				3	NO	YES
PF3D7_1425700	PF14_0237	conserved Plasmodium protein, unknown function	-0.805591	-0.0210775												√		√	√			3	NO	YES
PF3D7_0508800	PFE0435c	single-stranded DNA-binding protein (SSB)	-1.25837	-0.028535												√		√	√			3	NO	YES
PF3D7_0111500	PFA0555c	UMP-CMP kinase, putative	-2.13475	-0.029889												√		√	√			3	NO	YES
PF3D7_0602300	PFF0110w	liver merozoite formation protein, putative (PALM)	1.19258	-0.041735	√		transcribed						√	√		√						3	YES	YES
PF3D7_1326700	MAL13P1.360	conserved Plasmodium protein, unknown function	-1.53584	-0.0468415											√	√		√				3	NO	YES
PF3D7_1361100	PF13_0324	Sec24 subunit a (SEC24a)	-2.20027	-0.052741												√		√	√			3	NO	YES
PF3D7_0403100	PFD0145c	regulator of chromosome condensation, putative	-0.078339	-0.0531865										√		√			√			3	NO	YES
PF3D7_0934500	PFI1670c	vacuolar ATP synthase subunit e, putative	-1.81898	-0.054266												√		√	√			3	NO	YES
PF3D7_1218500	PFL0895c	conserved Plasmodium protein, unknown function	-1.44408	-0.055074												√		√	√			3	NO	YES
PF3D7_0716000	PF07_0066	RNA binding protein, putative	-0.879476	-0.059057												√		√	√			3	NO	YES
PF3D7_1354200	PF13_0285	inositol-polyphosphate 5-phosphatase, putative	-1.81228	-0.0657565												√		√	√			3	NO	YES
PF3D7_0921400	PFI1050c	Fe-S-cluster redox enzyme, putative (NifU)	0.591697	-0.0703375									√	√		√						3	NO	YES
PF3D7_0214100	PFB0640c	protein transport protein sec31 (SEC31)	-1.82386	-0.0710785												√		√	√			3	NO	YES
PF3D7_1318800	PF13_0102	secretory complex protein 63 (SEC63)	-1.66489	-0.074218												√		√	√			3	NO	YES
PF3D7_0110800	PFA0525w	transcription initiation factor TFIIB, putative	-1.17694	-0.074759												√		√	√			3	NO	YES
PF3D7_0630600	PFF1485w	conserved Plasmodium protein, unknown function	-1.91522	-0.0750855												√		√	√			3	NO	YES
PF3D7_1348500	MAL13P1.244	TBC domain protein, putative	-0.462767	-0.078244											√	√		√				3	NO	YES
PF3D7_1115900	PF11_0167	conserved Plasmodium membrane protein, unknown function	-0.759442	-0.0813435									√		√	√						3	NO	YES
PF3D7_1419600	PF14_0190	conserved Plasmodium protein, unknown function	-1.29083	-0.0817155											√	√			√			3	NO	YES
PF3D7_1248300	PFL2315c	conserved Plasmodium membrane protein, unknown function	-0.371755	-0.0856635											√	√			√			3	NO	YES
PF3D7_0318100	PFC0800w	band 7-related protein	-1.26926	-0.087395												√		√	√			3	NO	YES
PF3D7_0307400	PFC0310c	ATP-dependent Clp protease proteolytic subunit (ClpP)	-0.415746	-0.0893335										√		√			√			3	NO	YES
PF3D7_0309300	PFC0390w	N2227-like protein, putative	-1.20742	-0.089499												√		√	√			3	NO	YES
PF3D7_1238800	PFL1880w	acyl-CoA synthetase, PfACS11 (ACS11)	-0.0997895	-0.089607												√		√	√			3	NO	YES
PF3D7_0804900	PF08_0120	GTPase activator, putative	-2.00321	-0.091711												√		√	√			3	NO	YES
PF3D7_0525100	PFE1250w	acyl-CoA synthetase (ACS10)	0.215407	-0.0959												√		√	√			3	NO	YES
PF3D7_0503500	PFE0170c	protein kinase, putative	-1.10051	-0.100235										√		√		√				3	NO	YES
PF3D7_0320900	PFC0920w	histone H2A variant, putative (H2A.Z)	-3.85636	-0.101236												√		√	√			3	NO	YES
PF3D7_0911900	PFI0580c	falstatin (ICP)	-0.124636	-0.101853												√		√	√			3	NO	YES
PF3D7_1464700	PF14_0615	ATP synthase (C/AC39) subunit, putative	-2.3538	-0.104512												√		√	√			3	NO	YES
PF3D7_1004300	PF10_0046	zinc finger, C3HC4 type, putative	-1.05597	-0.106197								√				√		√				3	NO	YES
PF3D7_1335700	PF13_0199	conserved Plasmodium protein, unknown function	-0.821276	-0.108263												√		√	√			3	NO	YES
PF3D7_0108700	PFA0430c	secreted ookinete protein, putative (PSOP24)	-0.843458	-0.111865												√		√	√			3	NO	YES
PF3D7_1346400	MAL13P1.234	conserved Plasmodium protein, unknown function	-1.27964	-0.114923												√		√	√			3	NO	YES
PF3D7_0916600	PFI0815c	methyltransferase, putative	0.134512	-0.121333										√	√	√						3	NO	YES
PF3D7_1426900	PF14_0248	ubiquinol-cytochrome c reductase hinge protein, putative	1.65072	-0.132614	√		transcribed						√			√			√			3	YES	YES
PF3D7_1451000	PF14_0485	conserved Plasmodium protein, unknown function	-0.715663	-0.135795												√		√	√			3	NO	YES
PF3D7_1332000	MAL13P1.169	syntaxin, Qa-SNARE family (SYN5)	-0.074919	-0.136242												√		√	√			3	NO	YES
PF3D7_0904800	PFI0235w	replication protein A1, small fragment	-0.90051	-0.136452												√		√	√			3	NO	YES
PF3D7_1213900	PFL0675c	conserved Plasmodium protein, unknown function	-0.360046	-0.13939												√		√	√			3	NO	YES
PF3D7_0303000	PFC0140c	N-ethylmaleimide sensitive fusion protein, putative	-0.804366	-0.140602												√		√	√			3	NO	YES
PF3D7_1369400	MAL13P1.351	conserved Plasmodium protein, unknown function	-1.16537	-0.141522												√		√	√			3	NO	YES
PF3D7_1008400	PF10_0081	26S proteasome regulatory subunit 4, putative	0.647186	-0.14292												√		√	√			3	NO	YES
PF3D7_0423600	PFD1115c	conserved Plasmodium protein, unknown function	0.380776	-0.144147												√		√	√			3	NO	YES
PF3D7_1205600	PFL0280c	conserved Plasmodium protein, unknown function	1.85517	-0.146013	√		transcribed									√		√	√			3	YES	YES
PF3D7_1107300	PF11_0086	polyadenylate-binding protein-interacting protein 1, putative (PAIP1)	-0.601834	-0.156286												√		√	√			3	NO	YES
PF3D7_0410600	PFD0525w	conserved Plasmodium protein, unknown function	-1.21729	-0.156369												√		√	√			3	NO	YES
PF3D7_1311500	PF13_0063	26S proteasome regulatory subunit 7, putative	-1.24792	-0.158542												√		√	√			3	NO	YES
PF3D7_0413600	PFD0665c	26S proteasome AAA-ATPase subunit RPT3, putative	-2.33699	-0.159778												√		√	√			3	NO	YES
PF3D7_1419800.2	PF14_0192	glutathione reductase	-0.784615	-0.160612												√		√	√			3	NO	YES
PF3D7_0720400	PF07_0085	ferrodoxin reductase-like protein	-0.559028	-0.163734												√		√	√			3	NO	YES
PF3D7_0106300	PFA0310c	calcium-transporting ATPase (ATP6)	-1.71863	-0.168443												√		√	√			3	NO	YES
PF3D7_0208500	PFB0385w	acyl carrier protein (ACP)	-0.457734	-0.170169									√	√		√						3	NO	YES
PF3D7_1036900	PF10_0361	conserved Plasmodium protein, unknown function	-1.34425	-0.171974												√		√	√			3	NO	YES
PF3D7_0931400	PFI1525w	conserved Plasmodium protein, unknown function	-0.537448	-0.17475												√		√	√			3	NO	YES
PF3D7_0106800	PFA0335w	Rab GTPase 5c (RAB5c)	-0.0254415	-0.175143												√		√	√			3	NO	YES
PF3D7_1125900	PF11_0269	conserved Plasmodium protein, unknown function	-0.508369	-0.175625									√		√	√						3	NO	YES
PF3D7_0305700	PFC0255c	ubiquitin conjugating enzyme E2, putative	0.466491	-0.178306												√		√	√			3	NO	YES
PF3D7_1404900	PF14_0046	conserved Plasmodium protein, unknown function	-1.34963	-0.182116												√		√	√			3	NO	YES
PF3D7_1146200	PF11_0473	conserved Plasmodium protein, unknown function	0.685048	-0.186694									√		√	√						3	NO	YES
PF3D7_0204700	PFB0210c	hexose transporter (HT)	-2.20305	-0.187279												√		√	√			3	NO	YES
PF3D7_1113400	PF11_0142	ubiquitin domain containing protein	-2.42565	-0.188502												√		√	√			3	NO	YES
PF3D7_1209700	PFL0485w	conserved Plasmodium protein, unknown function	-0.462235	-0.191407												√		√	√			3	NO	YES
PF3D7_0607300	PFF0360w	uroporphyrinogen III decarboxylase (UROD)	0.434141	-0.191882									√	√		√						3	NO	YES
PF3D7_1007900	PF10_0077	eukaryotic translation initiation factor 3 subunit 7, putative	-1.89533	-0.193734												√		√	√			3	NO	YES
PF3D7_0811300	MAL8P1.104	CCR4-associated factor 1 (CAF1)	-1.81355	-0.19801												√		√	√			3	NO	YES
PF3D7_1473200	PF14_0700	DnaJ protein, putative	-0.0560405	-0.198648												√		√	√			3	NO	YES
PF3D7_1238500	PFL1865w	conserved Plasmodium protein, unknown function	-0.469785	-0.20901												√		√	√			3	NO	YES
PF3D7_1414400	PF14_0142	serine/threonine protein phosphatase (PP1)	0.330509	-0.216517												√		√	√			3	NO	YES
PF3D7_0723500	PF07_0098	dynactin 4, putative	0.349596	-0.219313									√	√		√						3	NO	YES
PF3D7_0205900	PFB0260w	proteasome 26S regulatory subunit, putative	-0.955101	-0.220933												√		√	√			3	NO	YES
PF3D7_0523100	PFE1155c	mitochondrial processing peptidase alpha subunit, putative	-1.07276	-0.221211												√		√	√			3	NO	YES
PF3D7_1239600	PFL1920c	hydroxyethylthiazole kinase, putative	-0.883858	-0.222104												√		√	√			3	NO	YES
PF3D7_0815300	PF08_0068	FAD-dependent monooxygenase, putative	0.021388	-0.222181										√		√			√			3	NO	YES
PF3D7_1231100	PFL1500w	Rab GTPase 2 (RAB2)	0.884713	-0.222461												√		√	√			3	NO	YES
PF3D7_1105700	PF11_0068	conserved protein, unknown function	-0.856651	-0.223382												√		√	√			3	NO	YES
PF3D7_1329100	MAL13P1.148	myosin C (MyoC)	-1.59963	-0.223844												√		√	√			3	NO	YES
PF3D7_1126900	PF11_0280	small nuclear ribonucleoprotein F, putative (SNRPF)	-1.22276	-0.224692												√		√	√			3	NO	YES
PF3D7_1332600	PF13_0176	apurinic/apyrimidinic endonuclease Apn1, putative (APN1)	0.42391	-0.22539												√		√	√			3	NO	YES
PF3D7_0627100	PFF1315w	ankyrin-repeat protein, putative	-1.91877	-0.2324												√		√	√			3	NO	YES
PF3D7_0404300	PFD0207c	conserved Plasmodium protein, unknown function	-0.325518	-0.235272												√		√	√			3	NO	YES
PF3D7_0619400	PFF0940c	cell division cycle protein 48 homologue, putative	-1.2645	-0.243375												√		√	√			3	NO	YES
PF3D7_1350100	PF13_0262	lysine-tRNA ligase, putative	-0.179665	-0.243441												√		√	√			3	NO	YES
PF3D7_0807800	PF08_0109	proteasome subunit alpha type 5, putative	-1.88121	-0.244767												√		√	√			3	NO	YES
PF3D7_1466300	PF14_0632	26S proteasome regulatory subunit, putative	-2.06049	-0.246271												√		√	√			3	NO	YES
PF3D7_0728000	PF07_0117	eukaryotic translation initiation factor 2 alpha subunit, putative	-1.8223	-0.246496												√		√	√			3	NO	YES
PF3D7_1409800	PF14_0096	RNA binding protein Bruno, putative (HoBo)	-1.31967	-0.24856												√		√	√			3	NO	YES
PF3D7_0108300	PFA0410w	conserved Plasmodium protein, unknown function	-1.53297	-0.248623												√		√	√			3	NO	YES
PF3D7_1122400	PF11_0232	conserved Plasmodium protein, unknown function	-0.169532	-0.251061												√		√	√			3	NO	YES
PF3D7_1437200	PF14_0352	ribonucleoside-diphosphate reductase, large subunit	-1.07658	-0.251283												√		√	√			3	NO	YES
PF3D7_1007700	PF10_0075	transcription factor with AP2 domain(s) (ApiAP2)	-1.09762	-0.253431												√		√	√			3	NO	YES
PF3D7_1206200	PFL0310c	eukaryotic translation initiation factor 3 subunit 8, putative	-0.231969	-0.258696												√		√	√			3	NO	YES
PF3D7_1321700	MAL13P1.120	splicing factor, putative	0.535928	-0.259792												√		√	√			3	NO	YES
PF3D7_1014600	PF10_0143	transcriptional coactivator ADA2 (ADA2)	-1.07849	-0.262492												√		√	√			3	NO	YES
PF3D7_1010800	PF10_0105	ribosomal protein, putative	0.5713	-0.265149									√	√		√						3	NO	YES
PF3D7_0730200	MAL7P1.164	adapter-related protein, putative	-1.75777	-0.265363												√		√	√			3	NO	YES
PF3D7_0930500	PFI1485c	diacylglycerol kinase, putative (DGK1)	0.495245	-0.268325				√								√			√			3	NO	YES
PF3D7_1444800	PF14_0425	fructose-bisphosphate aldolase	0.639588	-0.269364												√		√	√			3	NO	YES
PF3D7_1111100	PF11_0117	replication factor C subunit 5, putative (RFC5)	2.09759	-0.269454	√		transcribed									√		√	√			3	YES	YES
PF3D7_1417200	PF14_0170	NOT family protein, putative	-1.30517	-0.269521												√		√	√			3	NO	YES
PF3D7_1226600	PFL1285c	proliferating cell nuclear antigen 2 (PCNA2)	-1.91039	-0.269645												√		√	√			3	NO	YES
PF3D7_0816600	PF08_0063	ClpB protein, putative (ClpB1)	0.880655	-0.270896												√		√	√			3	NO	YES
PF3D7_1118400	PF11_0190	haloacid dehalogenase-like hydrolase, putative	-2.14053	-0.27124												√		√	√			3	NO	YES
PF3D7_1124600	PF11_0257	ethanolamine kinase, putative	0.992568	-0.272905												√		√	√			3	NO	YES
PF3D7_1210600	PFL0530c	conserved Plasmodium protein, unknown function	0.672733	-0.273906												√		√	√			3	NO	YES
PF3D7_0212300	PFB0550w	peptide chain release factor subunit 1, putative	0.579367	-0.282879												√		√	√			3	NO	YES
PF3D7_1118300	PF11_0189	insulinase, putative	-1.34631	-0.284058												√		√	√			3	NO	YES
PF3D7_1237700	PFL1825w	conserved Plasmodium membrane protein, unknown function	0.29857	-0.284688												√		√	√			3	NO	YES
PF3D7_1134000	PF11_0351	heat shock protein 70 (Hsp70-3)	1.24475	-0.28722	√		transcribed									√		√	√			3	YES	YES
PF3D7_1244600	PFL2140c	ADP-ribosylation factor GTPase-activating protein, putative	-0.992055	-0.28729												√		√	√			3	NO	YES
PF3D7_1113300	PF11_0141	UDP-galactose transporter, putative	1.33537	-0.288046	√		transcribed									√			√	√		3	YES	YES
PF3D7_1323600	PF13_0134	conserved Plasmodium protein, unknown function	-0.498757	-0.288705												√		√	√			3	NO	YES
PF3D7_0932300	PFI1570c	M18 aspartyl aminopeptidase (M18AAP)	-0.29483	-0.29031												√		√	√			3	NO	YES
PF3D7_0904000	PFI0195c	GTPase activator, putative	-0.534377	-0.291849												√		√	√			3	NO	YES
PF3D7_0316700	PFC0730w	HVA22/TB2/DP1 family protein, putative	-0.879916	-0.292627												√		√	√			3	NO	YES
PF3D7_1231600	PFL1525c	pre-mRNA-splicing factor ATP-dependent RNA helicase PRP2, putative (PRP2)	-0.955749	-0.293931												√		√	√			3	NO	YES
PF3D7_1142100	PF11_0433	conserved Plasmodium protein, unknown function	-1.01574	-0.295211												√		√	√			3	NO	YES
PF3D7_1416100	PF14_0159	root hair defective 3 GTP-binding protein (RHD3) homolog, putative	-1.40082	-0.300021												√		√	√			3	NO	YES
PF3D7_0206700	PFB0295w	adenylosuccinate lyase (ASL)	-0.321091	-0.300274												√		√	√			3	NO	YES
PF3D7_1469800	PF14_0666	conserved Plasmodium protein, unknown function	-0.317119	-0.300429									√			√		√				3	NO	YES
PF3D7_0110400	PFA0505c	DNA-directed RNA polymerase 2, putative	-0.372448	-0.300596										√		√			√			3	NO	YES
PF3D7_1349200	PF13_0257	glutamate--tRNA ligase, putative	-0.953334	-0.301484												√		√	√			3	NO	YES
PF3D7_0304200	PFC0190c	EH (Eps15 homology) protein (PAST1)	-0.171569	-0.301584												√		√	√			3	NO	YES
PF3D7_0304500	PFC0205c	1-cys-glutaredoxin-like protein-1 (GLP1)	0.265791	-0.307785									√		√	√						3	NO	YES
PF3D7_0822600	PF08_0036	protein transport protein Sec23 (SEC23)	-1.67651	-0.309724												√		√	√			3	NO	YES
PF3D7_1322000	MAL13P1.121	adenosine-diphosphatase, putative	0.793779	-0.310164												√			√	√		3	NO	YES
PF3D7_0807500	MAL8P1.128	proteasome subunit alpha, putative	-0.192303	-0.310568												√		√	√			3	NO	YES
PF3D7_1233600	PFL1620w	asparagine and aspartate rich protein 1 (AARP1)	0.00748	-0.313839												√		√	√			3	NO	YES
PF3D7_0606700	PFF0330w	coatomer alpha subunit, putative	-1.08818	-0.314063												√		√	√			3	NO	YES
PF3D7_0820500	MAL8P1.57	C-13 antigen	-1.72346	-0.314287												√		√	√			3	NO	YES
PF3D7_0607000	PFF0345w	translation initiation factor IF-2, putative	0.978919	-0.327249												√		√	√			3	NO	YES
PF3D7_1467800	PF14_0646	conserved Plasmodium protein, unknown function	-1.78209	-0.328109									√			√			√			3	NO	YES
PF3D7_0912400	PFI0605c	conserved Plasmodium protein, unknown function	-1.17851	-0.32993												√		√	√			3	NO	YES
PF3D7_1345700	PF13_0242	isocitrate dehydrogenase (NADP), mitochondrial precursor (IDH)	-0.122563	-0.331863												√		√	√			3	NO	YES
PF3D7_1224300	PFL1170w	polyadenylate-binding protein, putative (PABP)	-0.445631	-0.333109												√		√	√			3	NO	YES
PF3D7_1249500	PFL2375c	cutA, putative	-0.0077185	-0.333379												√		√	√			3	NO	YES
PF3D7_0812500	PF08_0086	RNA binding protein, putative	-0.102323	-0.335859												√		√	√			3	NO	YES
PF3D7_1412500	PF14_0124	actin II (ACT2)	-1.30357	-0.337008												√		√	√			3	NO	YES
PF3D7_0518300	PFE0915c	proteasome subunit beta type 1, putative	-1.07052	-0.338778												√		√	√			3	NO	YES
PF3D7_0217300	PFB0805c	clathrin coat assembly protein, putative	-2.20508	-0.34079									√	√		√						3	NO	YES
PF3D7_1212900	PFL0635c	bromodomain protein, putative	-1.26593	-0.341701												√		√	√			3	NO	YES
PF3D7_0627800	PFF1350c	acetyl-CoA synthetase, putative	-0.519131	-0.343746												√		√	√			3	NO	YES
PF3D7_1033700	PF10_0328	bromodomain protein, putative	-0.555377	-0.345414												√		√	√			3	NO	YES
PF3D7_1471200	PF14_0679	inorganic anion exchanger, inorganic anion antiporter (SulP)	-0.310136	-0.34662											√	√			√			3	NO	YES
PF3D7_1315500	MAL13P1.81	conserved Plasmodium protein, unknown function	-2.11756	-0.347047									√			√			√			3	NO	YES
PF3D7_1129200	PF11_0303	26S proteasome regulatory subunit, putative	0.96118	-0.34775												√		√	√			3	NO	YES
PF3D7_0603300	PFF0160c	dihydroorotate dehydrogenase, mitochondrial precursor (DHODH)	-0.571733	-0.349036												√		√	√			3	NO	YES
PF3D7_0317700	PFC0780w	CPSF (cleavage and polyadenylation specific factor), subunit A, putative	-0.352239	-0.350179										√		√			√			3	NO	YES
PF3D7_0905100	PFI0250c	nucleoporin NUP100/NSP100, putative (NUP100)	-1.20999	-0.350187												√		√	√			3	NO	YES
PF3D7_0405400	PFD0265w	pre-mRNA-processing-splicing factor 8, putative (PRPF8)	-0.902171	-0.353342												√		√	√			3	NO	YES
PF3D7_0707400	MAL7P1.209	AAA family ATPase, putative	0.522668	-0.356108												√		√	√			3	NO	YES
PF3D7_1340600	PF13_0222	RNA lariat debranching enzyme, putative (DBR1)	-0.231844	-0.356179												√		√	√			3	NO	YES
PF3D7_1118100	PF11_0187	clathrin assembly protein AP19, putative	-2.1274	-0.357209									√			√			√			3	NO	YES
PF3D7_1330000.1	MAL13P1.159	thioredoxin, putative	-0.538377	-0.361245												√		√	√			3	NO	YES
PF3D7_1429800	PF14_0277	coatamer beta subunit, putative	-0.756108	-0.363416												√		√	√			3	NO	YES
PF3D7_0829300	MAL8P1.9	U6 snRNA-associated Sm-like protein LSm8, putative (LSM8)	-0.922226	-0.364294										√		√			√			3	NO	YES
PF3D7_1222300	PFL1070c	endoplasmin homolog precursor, putative	-0.381034	-0.36489												√		√	√			3	NO	YES
PF3D7_1448600	PF14_0464	SNARE protein, putative (VTI1)	-0.872738	-0.369842												√		√	√			3	NO	YES
PF3D7_0922100	PFI1085w	ubiquitin-like protein, putative	-0.227228	-0.370753												√		√	√			3	NO	YES
PF3D7_1134800	PF11_0359	coatomer delta subunit, putative	-1.53065	-0.372541												√		√	√			3	NO	YES
PF3D7_0417300	PFD0835c	LETM1-like protein, putative	-0.856137	-0.372676												√		√	√			3	NO	YES
PF3D7_0729000	MAL7P1.158	signal recognition particle SRP9 (SRP9)	-0.791295	-0.374667									√	√		√						3	NO	YES
PF3D7_0419600	PFD0950w	ran binding protein 1, putative	-1.74392	-0.375545												√		√	√			3	NO	YES
PF3D7_1006800	PF10_0068	RNA binding protein, putative	-2.17338	-0.376842												√		√	√			3	NO	YES
PF3D7_1110200	PF11_0108	pre-mRNA-processing factor 6, putative (PRPF6)	-0.347081	-0.377677												√		√	√			3	NO	YES
PF3D7_0616800	PFF0815w	malate:quinone oxidoreductase, putative	0.901556	-0.380487												√		√	√			3	NO	YES
PF3D7_1466900	PF14_0637	rhoptry protein, putative	-0.920166	-0.381877												√		√	√			3	NO	YES
PF3D7_0605100	PFF0250w	RNA binding protein, putative	-1.77292	-0.382039												√		√	√			3	NO	YES
PF3D7_1457200	PF14_0545	thioredoxin 1 (TRX1)	-3.1586	-0.382069												√		√	√			3	NO	YES
PF3D7_1361900	PF13_0328	proliferating cell nuclear antigen (PCNA)	1.55709	-0.38322	√		transcribed									√		√	√			3	YES	YES
PF3D7_0702900	MAL7P1.10	centrin, putative	-0.822372	-0.383251									√	√		√						3	NO	YES
PF3D7_1458000	PF14_0553	cysteine proteinase falcipain 1	-1.19453	-0.383547												√		√	√			3	NO	YES
PF3D7_1434300	PF14_0324	Hsp70/Hsp90 organizing protein (HOP)	1.24683	-0.38359	√		transcribed									√		√	√			3	YES	YES
PF3D7_0211800	PFB0525w	asparagine-tRNA ligase, putative	-0.206767	-0.385339												√		√	√			3	NO	YES
PF3D7_0515000	PFE0750c	RNA recognition motif, putative	-1.13069	-0.386408												√		√	√			3	NO	YES
PF3D7_1474800	PF14_0716	proteosome subunit alpha type 1, putative	-1.05806	-0.386982												√		√	√			3	NO	YES
PF3D7_0717700	PF07_0073	seryl-tRNA synthetase, putative	-1.6171	-0.38735												√		√	√			3	NO	YES
PF3D7_0933900	PFI1640c	conserved Plasmodium protein, unknown function	0.77694	-0.387771									√			√			√			3	NO	YES
PF3D7_0611400	PFF0560c	SWI/SNF-related matrix-associated actin-dependent regulator of chromatin	-1.0132	-0.389877												√		√	√			3	NO	YES
PF3D7_1343900	MAL13P1.385	U4/U6 small nuclear ribonucleoprotein PRP4, putative (PRPF4)	-1.31481	-0.3901												√		√	√			3	NO	YES
PF3D7_0708400	PF07_0029	heat shock protein 90 (HSP90)	1.01188	-0.395612	√		transcribed									√		√	√			3	YES	YES
PF3D7_1227100	PFL1310c	DNA helicase 60 (DH60)	-0.222481	-0.39627												√		√	√			3	NO	YES
PF3D7_1360800	PF13_0322	falcilysin (FLN)	-0.993107	-0.396309												√		√	√			3	NO	YES
PF3D7_0418200	PFD0880w	golgi organization and biogenesis factor, putative	0.213291	-0.39671												√		√	√			3	NO	YES
PF3D7_0502900	PFE0140c	mitochondrial inner membrane TIM10 associated protein, putative	-0.460246	-0.397043									√	√		√						3	NO	YES
PF3D7_1106700	PF11_0078	dna2/nam7 helicase family member, putative	-0.191787	-0.397696												√		√	√			3	NO	YES
PF3D7_0703500	MAL7P1.12	erythrocyte membrane-associated antigen	-1.57204	-0.397777												√		√	√			3	NO	YES
PF3D7_1203700	PFL0185c	nucleosome assembly protein (NAPL)	0.638214	-0.398581												√		√	√			3	NO	YES
PF3D7_1311400	PF13_0062	clathrin-adaptor medium chain, putative	0.493077	-0.398734												√			√	√		3	NO	YES
PF3D7_1117300	PF11_0179	conserved Plasmodium protein, unknown function	-2.34612	-0.398859												√		√	√			3	NO	YES
PF3D7_0933600	PFI1625c	organelle processing peptidase, putative	-0.248949	-0.402902												√		√	√			3	NO	YES
PF3D7_0816700	MAL8P1.77	conserved Plasmodium protein, unknown function	-1.27558	-0.403651									√	√		√						3	NO	YES
PF3D7_0111900	PFA0575c	conserved Plasmodium protein, unknown function	-1.46784	-0.404035									√	√		√						3	NO	YES
PF3D7_0907600	PFI0365w	translation initiation factor SUI1, putative	-0.13755	-0.405365												√		√	√			3	NO	YES
PF3D7_1015600	PF10_0153	heat shock protein 60 (HSP60)	-0.431945	-0.405986												√		√	√			3	NO	YES
PF3D7_0919000	PFI0930c	nucleosome assembly protein (NAPS)	-1.39186	-0.406404												√		√	√			3	NO	YES
PF3D7_1368100	MAL13P1.343	proteasome regulatory subunit, putative	-1.57778	-0.406757												√		√	√			3	NO	YES
PF3D7_0610900	PFF0535c	trancription factor, putative	-0.851714	-0.408905												√		√	√			3	NO	YES
PF3D7_0213100	PFB0595w	heat shock protein 40, putative	0.0853055	-0.413077												√		√	√			3	NO	YES
PF3D7_1226300	PFL1270w	cof-like hydrolase, had-superfamily, subfamily iib	-2.355	-0.414928												√		√	√			3	NO	YES
PF3D7_1317000	PF13_0096	U4/U6.U5 tri-snRNP-associated protein 2, putative (USP39)	-0.304528	-0.415556												√		√	√			3	NO	YES
PF3D7_1130400	PF11_0314	26S proteasome regulatory subunit 6a, putative	-0.233967	-0.41754												√		√	√			3	NO	YES
PF3D7_1203500	PFL0175c	conserved Plasmodium protein, unknown function	-0.281383	-0.419479												√		√	√			3	NO	YES
PF3D7_1145100	PF11_0463	coatamer gamma subunit, putative	-1.62826	-0.420722												√		√	√			3	NO	YES
PF3D7_1331700	PF13_0170	glutaminyl-tRNA synthetase, putative	-1.9153	-0.423906												√		√	√			3	NO	YES
PF3D7_0603400	PFF0165c	conserved Plasmodium protein, unknown function	-0.983105	-0.424186												√		√	√			3	NO	YES
PF3D7_1249800	PFL2390c	conserved Plasmodium protein, unknown function	-0.579447	-0.424311												√		√	√			3	NO	YES
PF3D7_0723900	MAL7P1.126	conserved Plasmodium protein, unknown function	-1.01063	-0.426142												√		√	√			3	NO	YES
PF3D7_0814900	PF08_0071	Fe-superoxide dismutase (FeSOD)	-0.755953	-0.426506												√		√	√			3	NO	YES
PF3D7_1213200	PFL0640w	conserved Plasmodium protein, unknown function	-0.167425	-0.427283												√		√	√			3	NO	YES
PF3D7_0818900	PF08_0054	heat shock protein 70 (Hsp70)	0.01432	-0.428624												√		√	√			3	NO	YES
PF3D7_1441400	PF14_0393	FACT complex subunit SSRP1, putative (FACT-S)	-0.902458	-0.42936												√		√	√			3	NO	YES
PF3D7_1225800	PFL1245w	ubiquitin-activating enzyme e1, putative (Uba1)	-1.35913	-0.430466												√		√	√			3	NO	YES
PF3D7_1248900	PFL2345c	tat-binding protein homolog	-1.71327	-0.431752												√		√	√			3	NO	YES
PF3D7_0907900	PFI0380c	peptide deformylase (PDF)	0.684506	-0.432833										√		√		√				3	NO	YES
PF3D7_0306800	PFC0285c	T-complex protein beta subunit, putative	-0.227747	-0.434134												√		√	√			3	NO	YES
PF3D7_0622800	PFF1095w	leucyl tRNA synthase	-0.954283	-0.435028												√		√	√			3	NO	YES
PF3D7_1466400	PF14_0633	transcription factor with AP2 domain(s) (ApiAP2)	-1.71714	-0.436185												√		√	√			3	NO	YES
PF3D7_0912900	PFI0630w	26S proteasome regulatory subunit, putative	-0.583395	-0.437137												√		√	√			3	NO	YES
PF3D7_1021400	PF10_0208	endomembrane protein 70, putative	-1.83412	-0.437922												√		√	√			3	NO	YES
PF3D7_1123500	PF11_0246	conserved Plasmodium protein, unknown function	-0.574637	-0.438206												√		√	√			3	NO	YES
PF3D7_0309500	PFC0395w	asparagine synthetase, putative	-1.21374	-0.439294												√		√	√			3	NO	YES
PF3D7_0308600	PFC0365w	pre-mRNA-processing factor 19, putative (PRPF19)	-0.750235	-0.439302												√		√	√			3	NO	YES
PF3D7_1464900	PF14_0616	ATP-dependent protease la, putative	-1.45449	-0.441633												√		√	√			3	NO	YES
PF3D7_0925700	PFI1260c	histone deacetylase (HDAC1)	-0.073494	-0.442621												√		√	√			3	NO	YES
PF3D7_0511800	PFE0585c	myo-inositol 1-phosphate synthase, putative	-1.24019	-0.445275												√		√	√			3	NO	YES
PF3D7_1129900	PF11_0310	transporter, putative	-1.29478	-0.445704												√		√	√			3	NO	YES
PF3D7_1144500	PF11_0457	ubiquitin activating enzyme (E1) subunit Aos1, putative (AOS1)	0.037119	-0.447674												√		√	√			3	NO	YES
PF3D7_1338100	MAL13P1.190	proteasome regulatory subunit, putative	-1.51179	-0.448675												√		√	√			3	NO	YES
PF3D7_0931800	PFI1545c	proteasome precursor, putative	-1.64237	-0.449437												√		√	√			3	NO	YES
PF3D7_1306900	MAL13P1.35	U1 small nuclear ribonucleoprotein a, putative	-1.02551	-0.449796												√		√	√			3	NO	YES
PF3D7_0929200	PFI1435w	RNA binding protein, putative	0.545151	-0.453072												√		√	√			3	NO	YES
PF3D7_1129100	PF11_0302	parasitophorous vacuolar protein 1 (PV1)	-1.53457	-0.453256												√		√	√			3	NO	YES
PF3D7_1104100	PF11_0052	syntaxin, Qa-SNARE family (SYN13)	-0.933539	-0.454785												√		√	√			3	NO	YES
PF3D7_1003800	PF10_0041	U5 small nuclear ribonuclear protein, putative	-0.505966	-0.460139												√		√	√			3	NO	YES
PF3D7_0711300	MAL7P1.36	conserved Plasmodium protein, unknown function	-0.773631	-0.461748									√	√		√						3	NO	YES
PF3D7_1473500	PF14_0704	conserved Plasmodium protein, unknown function	-1.20279	-0.465353												√		√	√			3	NO	YES
PF3D7_1223400	PFL1125w	phospholipid-transporting ATPase, putative	0.22294	-0.467269												√			√	√		3	NO	YES
PF3D7_0708800	PF07_0033	heat shock protein 70 (HSP70-z)	1.0002	-0.467716	√		transcribed									√		√	√			3	YES	YES
PF3D7_1212100	PFL0600w	peripheral plastid protein 1, putative (PPP1)	0.975591	-0.467919												√		√	√			3	NO	YES
PF3D7_1308900	PF13_0048	mRNA-decapping enzyme 2, putative (DCP2)	-0.441203	-0.468106												√		√	√			3	NO	YES
PF3D7_0717900	MAL7P1.88	thioredoxin-like protein	0.476812	-0.468801												√		√	√			3	NO	YES
PF3D7_1353900	MAL13P1.270	proteasome subunit, putative	-1.9324	-0.469803												√		√	√			3	NO	YES
PF3D7_0823900	PF08_0031	dicarboxylate/tricarboxylate carrier (DTC)	-0.0508215	-0.469882												√		√	√			3	NO	YES
PF3D7_0415300	PFD0740w	cdc2-related protein kinase 3 (CRK3)	-0.122031	-0.474492												√		√		√		3	NO	YES
PF3D7_1427900	PF14_0257	conserved protein, unknown function	0.370954	-0.476331												√		√	√			3	NO	YES
PF3D7_0818200	MAL8P1.69	14-3-3 protein, putative	-0.486712	-0.477084												√		√	√			3	NO	YES
PF3D7_0308900	PFC0375c	splicing factor 3B subunit 1, putative (SF3B1)	-0.109311	-0.477173												√		√	√			3	NO	YES
PF3D7_0627700	PFF1345w	transportin	-0.926655	-0.47964												√		√	√			3	NO	YES
PF3D7_0527900	PFE1390w	RNA helicase 1	-0.771002	-0.480349												√		√	√			3	NO	YES
PF3D7_0810700	MAL8P1.107	conserved Plasmodium protein, unknown function	1.0533	-0.480745	√		transcribed						√			√			√			3	YES	YES
PF3D7_1211900	PFL0590c	non-SERCA-type Ca2 -transporting P-ATPase (ATP4)	-1.90297	-0.480859												√		√	√			3	NO	YES
PF3D7_1336800	PF13_0204	nuclear movement protein, putative	0.340768	-0.481956												√		√	√			3	NO	YES
PF3D7_0213200	PFB0600c	conserved Plasmodium protein, unknown function	1.12027	-0.482723	√		transcribed						√	√		√						3	YES	YES
PF3D7_1107800	PF11_0091	transcription factor with AP2 domain(s) (ApiAP2)	-1.3277	-0.484097				√				√				√						3	NO	YES
PF3D7_0320300	PFC0900w	T-complex protein 1 epsilon subunit, putative	0.104641	-0.484631												√		√	√			3	NO	YES
PF3D7_0108000	PFA0400c	beta3 proteasome subunit, putative	-1.14076	-0.485635												√		√	√			3	NO	YES
PF3D7_0422500	PFD1060w	pre-mRNA-splicing helicase BRR2, putative (BRR2)	-1.0451	-0.485775												√		√	√			3	NO	YES
PF3D7_0629100	PFF1410c	nicotinate phosphoribosyltransferase, putative	0.462066	-0.486734												√		√	√			3	NO	YES
PF3D7_0624400	PFF1175c	conserved Plasmodium protein, unknown function	0.068669	-0.487722												√		√	√			3	NO	YES
PF3D7_0110200	PFA0500w	human hepatopoietin-like protein, putative	-0.018367	-0.490668									√	√		√						3	NO	YES
PF3D7_0714000	PF07_0054	histone H2B variant, putative (H2Bv)	-0.21792	-0.491289												√		√	√			3	NO	YES
PF3D7_1119300	PF11_0200	U2 snRNP auxiliary factor, small subunit, putative	0.283718	-0.491602												√		√	√			3	NO	YES
PF3D7_0910100	PFI0490c	Ran-binding protein, putative	-1.50421	-0.491935												√		√	√			3	NO	YES
PF3D7_1034000	PF10_0331	Sec1 family protein, putative	0.032532	-0.492377												√		√	√			3	NO	YES
PF3D7_1327800	PF13_0157	ribose-phosphate pyrophosphokinase, putative	-1.00766	-0.493108												√		√	√			3	NO	YES
PF3D7_1125200	PF11_0263	conserved Plasmodium protein, unknown function	0.0868495	-0.494418									√			√			√			3	NO	YES
PF3D7_1438100	PF14_0361	secretory complex protein 62 (SEC62)	-0.575141	-0.495563												√		√	√			3	NO	YES
PF3D7_0415000	PFD0725c	arsenical pump-driving ATPase, putative	-1.61531	-0.496051												√		√	√			3	NO	YES
PF3D7_1306600	PF13_0034	vacuolar ATP synthase subunit h, putative	-1.47939	-0.496646												√		√	√			3	NO	YES
PF3D7_1311000	MAL13P1.53	conserved Plasmodium protein, unknown function	-0.152537	-0.497474									√		√	√						3	NO	YES
PF3D7_1326100	MAL13P1.142	conserved Plasmodium protein, unknown function	-0.368303	-0.500846												√		√	√			3	NO	YES
PF3D7_1144900	PF11_0461	Rab GTPase 6 (RAB6)	-1.73353	-0.503004												√		√	√			3	NO	YES
PF3D7_1232100	PFL1545c	60 kDa chaperonin (CPN60)	-1.66282	-0.503629												√		√	√			3	NO	YES
PF3D7_1352800	PF13_0274	vacuolar fusion protein MON1, putative	-0.633852	-0.504165												√		√	√			3	NO	YES
PF3D7_0204500	PFB0200c	aspartate aminotransferase,aspartate transaminase (AspAT)	-0.626961	-0.504206												√		√	√			3	NO	YES
PF3D7_1111300	PF11_0119	SNARE protein, putative (GS27)	-0.639269	-0.506245												√		√	√			3	NO	YES
PF3D7_1454700	PF14_0520	6-phosphogluconate dehydrogenase, decarboxylating, putative	-1.37015	-0.506451												√		√	√			3	NO	YES
PF3D7_1126000	PF11_0270	threonyl-tRNA synthetase,Threonine--tRNA ligase (ThrRS)	-0.469947	-0.506959												√		√	√			3	NO	YES
PF3D7_1105800	PF11_0069	conserved Plasmodium protein, unknown function	-2.18498	-0.507127												√		√	√			3	NO	YES
PF3D7_1034900	PF10_0340	methionine-tRNA ligase, putative	-0.410384	-0.508896												√		√	√			3	NO	YES
PF3D7_1136300	PF11_0374	tudor staphylococcal nuclease (TSN)	-0.306608	-0.509613												√		√	√			3	NO	YES
PF3D7_1315700	PF13_0087	1-methyladenosine tRNA methyltransferase subunit, putative	1.34785	-0.513106	√		transcribed									√		√	√			3	YES	YES
PF3D7_0811500	PF08_0092	histone-arginine methyltransferase, putative (CARM1)	-0.102024	-0.513769												√		√	√			3	NO	YES
PF3D7_1342000	PF13_0228	40S ribosomal protein S6, putative	-0.650653	-0.513833												√		√	√			3	NO	YES
PF3D7_0916700	PFI0820c	RNA-binding protein musashi, putative (HoMu)	-1.94342	-0.514324												√		√	√			3	NO	YES
PF3D7_0527500	PFE1370w	hsp70 interacting protein, putative	0.505781	-0.515095												√		√	√			3	NO	YES
PF3D7_1367700	PF13_0354	alanyl-tRNA synthetase,Alanine--tRNA ligase (AlaRS)	-0.697134	-0.517006												√		√	√			3	NO	YES
PF3D7_1225700	PFL1240c	conserved Plasmodium protein, unknown function	-0.376609	-0.51747												√		√	√			3	NO	YES
PF3D7_1108200	PF11_0095	D-tyrosyl-tRNA(Tyr) deacylase (DTD)	-1.38396	-0.517943												√		√	√			3	NO	YES
PF3D7_1110400	PF11_0111	asparagine-rich antigen	-1.34862	-0.520427												√		√	√			3	NO	YES
PF3D7_0821800	MAL8P1.51	secretory complex protein 61 beta subunit (Sec61-beta)	-1.07418	-0.520602										√		√			√			3	NO	YES
PF3D7_0323000	PFC1025w	conserved Plasmodium protein, unknown function	-1.74019	-0.524564									√	√		√						3	NO	YES
PF3D7_1402300	PF14_0025	26S proteasome regulatory subunit (RPN6)	-2.22773	-0.524587												√		√	√			3	NO	YES
PF3D7_0706000	MAL7P1.202	conserved Plasmodium protein, unknown function	0.638339	-0.524971												√		√	√			3	NO	YES
PF3D7_0816100	MAL8P1.81	flavoprotein, putative	1.11738	-0.526504	√		transcribed									√		√	√			3	YES	YES
PF3D7_1011200.2	PF10_0109	conserved Plasmodium protein, unknown function	-1.49801	-0.528068									√	√		√						3	NO	YES
PF3D7_0308200	PFC0350c	TCP-1/cpn60 chaperonin family, putative	-1.05661	-0.529799												√		√	√			3	NO	YES
PF3D7_1362200	PF13_0330	ATP-dependent DNA helicase, putative	0.656935	-0.530556												√		√	√			3	NO	YES
PF3D7_0803800	MAL8P1.142	20S proteasome beta subunit	0.435154	-0.531544												√		√	√			3	NO	YES
PF3D7_1470900	PF14_0676	20S proteasome beta 4 subunit, putative	-1.94503	-0.531778												√		√	√			3	NO	YES
PF3D7_1242800	PFL2060c	rab specific GDP dissociation inhibitor (rabGDI)	-0.352163	-0.532761												√		√	√			3	NO	YES
PF3D7_0614400	PFF0695w	conserved Plasmodium protein, unknown function	-0.727021	-0.537781										√	√	√						3	NO	YES
PF3D7_0910800	PFI0525w	nucleotide binding protein, putative	-0.648516	-0.540467												√		√	√			3	NO	YES
PF3D7_1220900	PFL1005c	heterochromatin protein 1 (HP1)	0.983001	-0.542458												√		√	√			3	NO	YES
PF3D7_1011800	PF10_0115	QF122 antigen	-0.207614	-0.54293												√		√	√			3	NO	YES
PF3D7_0406100	PFD0305c	vacuolar ATP synthase subunit b	0.240385	-0.543145												√		√	√			3	NO	YES
PF3D7_1420400	PF14_0198	glycyl-tRNA synthetase,glycine--tRNA ligase (GlyRS)	-0.274713	-0.543541												√		√	√			3	NO	YES
PF3D7_1106000	PF11_0071	RuvB DNA helicase, putative	-0.289975	-0.545984												√		√	√			3	NO	YES
PF3D7_1434800	PF14_0329	conserved protein, unknown function	-0.294007	-0.551476												√		√	√			3	NO	YES
PF3D7_0617200	PFF0835w	conserved Plasmodium protein, unknown function	-0.340148	-0.553773												√		√	√			3	NO	YES
PF3D7_0109800	PFA0480w	phenylalanyl-tRNA synthetase, putative	-1.64094	-0.559537												√		√	√			3	NO	YES
PF3D7_1344800	MAL13P1.221	aspartate carbamoyltransferase (atcasE)	0.0654855	-0.559975												√		√	√			3	NO	YES
PF3D7_1311200	MAL13P1.54	conserved Plasmodium protein, unknown function	-0.681647	-0.560735												√		√	√			3	NO	YES
PF3D7_1424400	PF14_0231	60S ribosomal protein L7-3, putative	-1.04193	-0.561242												√		√	√			3	NO	YES
PF3D7_0305300	PFC0240c	conserved Plasmodium membrane protein, unknown function	-0.759365	-0.564507												√		√	√			3	NO	YES
PF3D7_0727400	PF07_0112	proteasome subunit alpha type 5, putative	-1.90839	-0.566609												√		√	√			3	NO	YES
PF3D7_1029400	PF10_0287	conserved Plasmodium protein, unknown function	-1.5306	-0.567197												√		√	√			3	NO	YES
PF3D7_0807900	MAL8P1.125	tyrosyl-tRNA synthetase, putative	-0.593532	-0.57057												√		√	√			3	NO	YES
PF3D7_0903200	PFI0155c	Rab GTPase 7 (Rab7)	1.02041	-0.571301	√		transcribed									√		√	√			3	YES	YES
PF3D7_1219100	PFL0930w	clathrin heavy chain, putative	-1.4545	-0.571589												√		√	√			3	NO	YES
PF3D7_1346300	MAL13P1.233	DNA/RNA-binding protein Alba 2 (ALBA2)	-1.28231	-0.574481												√		√	√			3	NO	YES
PF3D7_0527200	PFE1355c	ubiquitin carboxyl-terminal hydrolase, putative	-0.371087	-0.577794												√		√	√			3	NO	YES
PF3D7_1458400	PF14_0557	conserved Plasmodium protein, unknown function	-0.778622	-0.578311												√		√	√			3	NO	YES
PF3D7_1419700	PF14_0191	conserved Plasmodium protein, unknown function	0.69022	-0.578604												√		√	√			3	NO	YES
PF3D7_1215900	PFL0765w	conserved Plasmodium membrane protein, unknown function (PfSR10)	-1.10282	-0.578974												√		√	√			3	NO	YES
PF3D7_1323100	PF13_0129	60S ribosomal protein L6, putative	0.0483695	-0.584156												√		√	√			3	NO	YES
PF3D7_0629800	PFF1445c	cullin-like protein, putative	0.590484	-0.584872												√		√	√			3	NO	YES
PF3D7_0906500	PFI0320w	arginase	-1.70357	-0.587399												√		√	√			3	NO	YES
PF3D7_1111200	PF11_0118	conserved Plasmodium protein, unknown function	-0.269762	-0.588472											√	√		√				3	NO	YES
PF3D7_0608500	PFF0420c	proteasome subunit alpha type 2, putative	-0.316806	-0.589751												√		√	√			3	NO	YES
PF3D7_0722400	MAL7P1.122	GTP binding protein, putative	-1.17417	-0.589792												√		√	√			3	NO	YES
PF3D7_0810800	PF08_0095	dihydropteroate synthetase (DHPS)	0.505618	-0.59236												√		√	√			3	NO	YES
PF3D7_1116400	PF11_0171	ER membrane protein Sec12 (SEC12)	-0.39189	-0.593792												√		√	√			3	NO	YES
PF3D7_1247400	PFL2275c	FK506-binding protein (FKBP)-type peptidyl-prolyl isomerase (FKBP35)	0.665834	-0.596085												√		√	√			3	NO	YES
PF3D7_1357900	MAL13P1.284	pyrroline carboxylate reductase	0.4838	-0.600158												√		√	√			3	NO	YES
PF3D7_0519700	PFE0990w	conserved Plasmodium protein, unknown function	-2.04345	-0.603468												√		√	√			3	NO	YES
PF3D7_0317800	PFC0785c	proteasome regulatory protein, putative	1.90165	-0.603528	√		transcribed									√		√	√			3	YES	YES
PF3D7_0722000	PF07_0090	conserved Plasmodium protein, unknown function	0.515704	-0.608908										√	√	√						3	NO	YES
PF3D7_1021100	PF10_0205	conserved Plasmodium protein, unknown function	-1.0806	-0.610464												√		√	√			3	NO	YES
PF3D7_1212700	PFL0625c	eukaryotic translation initiation factor 3 subunit 10, putative	-0.0595775	-0.610602												√		√	√			3	NO	YES
PF3D7_1453800	PF14_0511	glucose-6-phosphate dehydrogenase-6-phosphogluconolactonase (G6PDH)	-0.003967	-0.610997												√		√	√			3	NO	YES
PF3D7_1314100	MAL13P1.73	conserved Plasmodium protein, unknown function	-0.757751	-0.613839												√		√	√			3	NO	YES
PF3D7_1233900	PFL1635w	sentrin-specific protease 1 (SENP1)	-0.271972	-0.613927												√		√	√			3	NO	YES
PF3D7_1012500	PF10_0122	phosphoglucomutase, putative	-1.34065	-0.616899												√		√	√			3	NO	YES
PF3D7_1128100	PF11_0292	cochaperone prefoldin complex subunit, putative	0.563565	-0.617343												√		√	√			3	NO	YES
PF3D7_1030500	PF10_0298	26S proteasome regulatory subunit, putative	-1.73913	-0.617762												√		√	√			3	NO	YES
PF3D7_1412800	PF14_0127	N-myristoyltransferase (NMT)	1.26617	-0.618019	√		transcribed									√		√	√			3	YES	YES
PF3D7_0214000	PFB0635w	T-complex protein 1, putative	-0.49762	-0.618773												√		√	√			3	NO	YES
PF3D7_0511500	PFE0570w	RNA pseudouridylate synthase, putative	-0.317283	-0.619108												√		√		√		3	NO	YES
PF3D7_0812400	PF08_0087	karyopherin alpha (KARalpha)	-0.110405	-0.619687												√		√	√			3	NO	YES
PF3D7_1451800	PF14_0493	sortilin, putative	-0.786496	-0.620235												√		√	√			3	NO	YES
PF3D7_1008900	PF10_0086	adenylate kinase (AK1)	0.174056	-0.621754												√		√	√			3	NO	YES
PF3D7_0617000	PFF0825c	mitochondrial import receptor subunit tom40, putative	-1.00654	-0.622038												√		√	√			3	NO	YES
PF3D7_0608800	PFF0435w	ornithine aminotransferase (OAT)	-1.86078	-0.6234												√		√	√			3	NO	YES
PF3D7_0302900	PFC0135c	exportin 1, putative	-1.23558	-0.624516												√		√	√			3	NO	YES
PF3D7_1116800	PF11_0175	heat shock protein 101 (HSP101)	-0.844201	-0.624581												√		√	√			3	NO	YES
PF3D7_1461900	PF14_0589	valine-tRNA ligase, putative	-0.593583	-0.625529												√		√	√			3	NO	YES
PF3D7_0925200	PFI1235w	rRNA processing and telomere maintaining methyltransferase, putative	-0.672713	-0.625651										√	√	√						3	NO	YES
PF3D7_0112000	PFA0580c	TatD-like deoxyribonuclease, putative	-0.4164	-0.625966												√		√	√			3	NO	YES
PF3D7_0619500	PFF0945c	acyl-CoA synthetase (ACS12)	0.109999	-0.629431												√		√	√			3	NO	YES
PF3D7_1037100	PF10_0363	pyruvate kinase 2 (PyKII)	0.849808	-0.634581												√		√	√			3	NO	YES
PF3D7_1437800	PF14_0358	41-2 protein antigen precursor,transport protein particle (TRAPP) component, Bet3	-1.16988	-0.634712												√		√	√			3	NO	YES
PF3D7_1468700	PF14_0655	eukaryotic initiation factor 4A (eIF4A)	-0.988816	-0.634845												√		√	√			3	NO	YES
PF3D7_0608700	PFF0430w	chaperone, putative	-0.299179	-0.635007												√		√	√			3	NO	YES
PF3D7_0520300	PFE1020w	U6 snRNA-associated sm-like protein lsm2, putative (LSM2)	-0.001212	-0.637235												√		√	√			3	NO	YES
PF3D7_1142700	PF11_0439	conserved protein, unknown function	-0.890582	-0.641044												√		√	√			3	NO	YES
PF3D7_0822800	MAL8P1.43	U5 snrnp-specific protein, putative	-0.626868	-0.64112												√		√	√			3	NO	YES
PF3D7_0629700	PFF1440w	SET domain protein, putative (SET1)	-0.518245	-0.643286												√				√	√	3	NO	YES
PF3D7_1462800	PF14_0598	glyceraldehyde-3-phosphate dehydrogenase (GAPDH)	0.41308	-0.645915												√		√	√			3	NO	YES
PF3D7_1328100	PF13_0156	proteasome subunit beta type 7 precursor, putative	0.404014	-0.648346												√		√	√			3	NO	YES
PF3D7_0612100	PFF0590c	eukaryotic translation initiation factor 3 subunit L, putative	-1.02745	-0.649485												√		√	√			3	NO	YES
PF3D7_0106100	PFA0300c	vacuolar ATP synthase subunit c, putative	-0.936437	-0.649834												√		√	√			3	NO	YES
PF3D7_1342400	PF13_0232	casein kinase II beta chain (CK2beta2)	0.756413	-0.650195												√		√	√			3	NO	YES
PF3D7_1238100	PFL1845c	calcyclin binding protein, putative	0.72225	-0.650238												√		√	√			3	NO	YES
PF3D7_0318300	PFC0810c	conserved Plasmodium protein, unknown function	-1.13773	-0.656544												√		√	√			3	NO	YES
PF3D7_1459600	PF14_0569	conserved Plasmodium protein, unknown function	-0.708092	-0.660058												√		√	√			3	NO	YES
PF3D7_0812700	PF08_0084	RNA-binding protein (U1 snRNP-like), putative	0.84415	-0.660624												√		√	√			3	NO	YES
PF3D7_0102900	PFA0145c	aspartyl-tRNA synthetase	1.09521	-0.666706	√		transcribed									√		√	√			3	YES	YES
PF3D7_1310800	MAL13P1.52	conserved Plasmodium protein, unknown function	-0.859186	-0.668017												√		√	√			3	NO	YES
PF3D7_1432100	PF14_0301	conserved protein, unknown function	-2.126	-0.672328												√		√	√			3	NO	YES
PF3D7_1237800	PFL1830w	ubiquitin-like protein, putative	0.687677	-0.674255									√			√			√			3	NO	YES
PF3D7_1456700	PF14_0540	conserved Plasmodium protein, unknown function	0.155782	-0.675824												√		√	√			3	NO	YES
PF3D7_1146000	PF11_0471	nucleolar preribosomal assembly protein, putative	-0.595771	-0.678094												√		√	√			3	NO	YES
PF3D7_1119000	PF11_0197	acyl-CoA-binding protein, putative	1.08425	-0.678571	√		transcribed									√		√	√			3	YES	YES
PF3D7_0814200	PF08_0074	DNA/RNA-binding protein Alba 1 (ALBA1)	-0.499333	-0.68149												√		√	√			3	NO	YES
PF3D7_1027800	PF10_0272	60S ribosomal protein L3, putative	-2.00551	-0.685894												√		√	√			3	NO	YES
PF3D7_0517700	PFE0885w	eukaryotic translation initiation factor, putative	0.406584	-0.687966												√		√	√			3	NO	YES
PF3D7_0626700	PFF1295w	conserved protein, unknown function	0.168104	-0.688562												√		√	√			3	NO	YES
PF3D7_1123400	PF11_0245	translation elongation factor EF-1, subunit alpha, putative	0.213846	-0.690798												√		√	√			3	NO	YES
PF3D7_1234800	PFL1680w	Splicing factor 3B subunit 3, putative (SF3B3)	-1.28574	-0.691463												√		√	√			3	NO	YES
PF3D7_1407800	PF14_0075	plasmepsin IV (PM4)	0.874067	-0.693369												√		√	√			3	NO	YES
PF3D7_1324700	MAL13P1.135	SNARE protein, putative (YKT6.2)	-2.04371	-0.696748												√		√	√			3	NO	YES
PF3D7_0110900	PFA0530c	adenylate kinase, putative	0.233117	-0.697059										√		√			√			3	NO	YES
PF3D7_1011700	PF10_0114	DNA repair protein RAD23, putative	0.964912	-0.698253												√		√	√			3	NO	YES
PF3D7_1139900	PF11_0409	conserved Plasmodium protein, unknown function	-1.36231	-0.69877												√		√	√			3	NO	YES
PF3D7_1213800	PFL0670c	bifunctional aminoacyl-tRNA synthetase, putative	-1.36571	-0.698862												√		√	√			3	NO	YES
PF3D7_0823300	PF08_0034	histone acetyltransferase GCN5 (GCN5)	-1.5031	-0.699501												√		√	√			3	NO	YES
PF3D7_1344200	MAL13P1.540	heat shock protein 70, putative (HSP70-y)	-0.328508	-0.70225												√		√	√			3	NO	YES
PF3D7_0303300	PFC0155c	DNA-directed RNA polymerase subunit I, putative	0.183899	-0.705286										√		√			√			3	NO	YES
PF3D7_0924700	PFI1215w	splicing factor 3A subunit 3, putative (SF3A3)	0.011316	-0.706113											√	√			√			3	NO	YES
PF3D7_1129000	PF11_0301	spermidine synthase (SpdSyn)	-2.27449	-0.706929												√		√	√			3	NO	YES
PF3D7_1445100	PF14_0428	histidine--tRNA ligase, putative	-0.584589	-0.708045												√		√	√			3	NO	YES
PF3D7_0503300	PFE0160c	Ser/Arg-rich splicing factor, putative	-0.733773	-0.708868												√		√	√			3	NO	YES
PF3D7_1015200.2	PF10_0149	cysteinyl-tRNA synthetase, putative	-0.911349	-0.710458												√		√	√			3	NO	YES
PF3D7_1352700	PF13_0273	P-loop containing nucleoside triphosphate hydrolase, putative	-0.048388	-0.712867												√			√	√		3	NO	YES
PF3D7_0919700	PFI0965w	pyridoxal 5'-phosphate dependent enzyme class III, putative	1.25506	-0.714448	√		transcribed									√		√	√			3	YES	YES
PF3D7_0602200	PFF0105w	MYND finger protein, putative	-0.331308	-0.718629												√		√	√			3	NO	YES
PF3D7_1451100	PF14_0486	elongation factor 2	0.023473	-0.719992												√		√	√			3	NO	YES
PF3D7_0813400	PF08_0081	conserved Plasmodium protein, unknown function	-1.5497	-0.720776												√		√	√			3	NO	YES
PF3D7_1414800	PF14_0146	small nuclear ribonucleoprotein-associated protein B, putative (SNRPB)	-1.84583	-0.722407												√		√	√			3	NO	YES
PF3D7_0615600	PFF0755c	conserved Plasmodium protein, unknown function	-0.421843	-0.725803												√				√	√	3	NO	YES
PF3D7_1419300	PF14_0187	glutathione S-transferase (GST)	0.136664	-0.729251												√		√	√			3	NO	YES
PF3D7_0610800	PFF0530w	transketolase (TK)	1.06293	-0.729273	√		transcribed									√		√	√			3	YES	YES
PF3D7_1413900	PF14_0137	DnaJ protein, putative	-1.24038	-0.729761												√		√	√			3	NO	YES
PF3D7_0926700	PFI1310w	NAD synthase, putative	-0.401528	-0.730328												√		√	√			3	NO	YES
PF3D7_1317400	PF13_0099	conserved Plasmodium protein, unknown function	0.902633	-0.730983												√		√	√			3	NO	YES
PF3D7_1314900	MAL13P1.76	TFIIH basal transcription factor subunit	-1.2723	-0.731506												√		√	√			3	NO	YES
PF3D7_1025300	PF10_0246	conserved Plasmodium protein, unknown function	0.214991	-0.732007												√		√	√			3	NO	YES
PF3D7_1438600	PF14_0365	conserved Plasmodium protein, unknown function	-1.58678	-0.733711												√		√	√			3	NO	YES
PF3D7_0316600	PFC0725c	formate-nitrite transporter, putative	1.24225	-0.73378	√		transcribed									√		√	√			3	YES	YES
PF3D7_0932800	PFI1590c	conserved Plasmodium protein, unknown function	-0.178061	-0.733917												√		√	√			3	NO	YES
PF3D7_1445900	PF14_0437	DEAD/DEAH box ATP-dependent RNA helicase, putative	0.680238	-0.736903												√		√	√			3	NO	YES
PF3D7_1359400	PF13_0315	rRNA associated RNA binding protein, putative	0.745207	-0.737135												√		√	√			3	NO	YES
PF3D7_1218600	PFL0900c	arginyl-tRNA synthetase, putative	-0.918212	-0.741276												√		√	√			3	NO	YES
PF3D7_0517300	PFE0865c	pre-mRNA-splicing factor (SR1)	1.11358	-0.747642	√		transcribed									√		√	√			3	YES	YES
PF3D7_0205500	PFB0245c	DNA-directed RNA polymerase II 16 kDa subunit, putative	-1.09337	-0.748142									√	√		√						3	NO	YES
PF3D7_0923900	PFI1175c	RNA binding protein, putative	1.09849	-0.748656	√		transcribed									√		√	√			3	YES	YES
PF3D7_0813300	MAL8P1.95	conserved Plasmodium protein, unknown function	0.287997	-0.748973												√		√	√			3	NO	YES
PF3D7_1368600	PF13_0358	mitochondrial import inner membrane translocase, putative	0.1102	-0.749871									√		√	√						3	NO	YES
PF3D7_0721100	PF07_0087	conserved Plasmodium protein, unknown function	-0.956276	-0.754854												√		√	√			3	NO	YES
PF3D7_0814000	PF08_0075	60S ribosomal protein L13-2, putative	0.014008	-0.759945												√		√	√			3	NO	YES
PF3D7_1354400	MAL13P1.271	V-type ATPase, putative	0.476292	-0.760831												√		√	√			3	NO	YES
PF3D7_0918300	PFI0895c	eukaryotic translation initiation factor 3 subunit 5, putative	-0.628371	-0.761919												√		√	√			3	NO	YES
PF3D7_0624000	PFF1155w	hexokinase (HK)	-0.992759	-0.76429												√		√	√			3	NO	YES
PF3D7_0815200	PF08_0069	importin beta, putative	-1.71693	-0.76445												√		√	√			3	NO	YES
PF3D7_0915400	PFI0755c	6-phosphofructokinase (PFK9)	-0.870354	-0.768957												√		√	√			3	NO	YES
PF3D7_1323400	PF13_0132	60S ribosomal protein L23a, putative	-1.78658	-0.771791												√		√	√			3	NO	YES
PF3D7_1120500	PF11_0212	tRNA nucleotidyltransferase, putative	-1.31981	-0.772586												√		√	√			3	NO	YES
PF3D7_0917900	PFI0875w	heat shock protein 70 (Hsp70-2)	-0.505482	-0.774374												√		√	√			3	NO	YES
PF3D7_0609000	PFF0445w	conserved Plasmodium protein, unknown function	-0.843409	-0.775339												√		√	√			3	NO	YES
PF3D7_1311800	MAL13P1.56	M1-family alanyl aminopeptidase (M1AAP)	-1.60638	-0.778303												√		√	√			3	NO	YES
PF3D7_1229500	PFL1425w	T-complex protein 1, gamma subunit, putative	0.645469	-0.779502												√		√	√			3	NO	YES
PF3D7_1129400	PF11_0305	RNA methyltransferase, putative	1.4551	-0.782393	√		transcribed									√		√	√			3	YES	YES
PF3D7_0810000	PF08_0099	acyl-CoA binding protein, putative	-0.566329	-0.783536										√		√			√			3	NO	YES
PF3D7_1459400	PF14_0567	conserved Plasmodium protein, unknown function	-1.98909	-0.785584												√		√	√			3	NO	YES
PF3D7_1142600	PF11_0438	60S ribosomal protein L35ae, putative	-1.3231	-0.786601												√		√	√			3	NO	YES
PF3D7_0827900	MAL8P1.17	protein disulfide isomerase (PDI8)	1.09666	-0.787205	√		transcribed									√		√	√			3	YES	YES
PF3D7_1407100	PF14_0068	fibrillarin, putative (NOP1)	-0.338974	-0.787832												√		√	√			3	NO	YES
PF3D7_1333400	MAL13P1.172	conserved protein, unknown function	-1.61061	-0.787965												√		√	√			3	NO	YES
PF3D7_0310700	PFC0445w	sybindin-like protein, putative	0.678401	-0.788189												√		√	√			3	NO	YES
PF3D7_0922500	PFI1105w	phosphoglycerate kinase (PGK)	-2.33322	-0.793697												√		√	√			3	NO	YES
PF3D7_0209800	PFB0445c	ATP-dependent RNA helicase UAP56 (UAP56)	0.390821	-0.793806												√		√	√			3	NO	YES
PF3D7_0912500	PFI0610w	conserved Plasmodium protein, unknown function	-0.402977	-0.794782												√		√	√			3	NO	YES
PF3D7_0721600	PF07_0088	40S ribosomal protein S5, putative	-0.812876	-0.79527												√		√	√			3	NO	YES
PF3D7_1458600	PF14_0559	conserved Plasmodium protein, unknown function	0.1541	-0.795582												√		√	√			3	NO	YES
PF3D7_1314500	PF13_0082	cop-coated vesicle membrane protein p24 precursor, putative	0.634031	-0.797445												√		√	√			3	NO	YES
PF3D7_0516900	PFE0845c	60S ribosomal protein L8, putative	0.968824	-0.79855												√		√	√			3	NO	YES
PF3D7_1345100	MAL13P1.225	thioredoxin 2 (TRX2)	-1.66339	-0.804794												√		√	√			3	NO	YES
PF3D7_0715000	PF07_0059	4-nitrophenylphosphatase (PNPase)	-1.32074	-0.809356												√		√	√			3	NO	YES
PF3D7_1458100	PF14_0554	conserved Plasmodium protein, unknown function	-0.264479	-0.810586									√			√			√			3	NO	YES
PF3D7_0315100	PFC0635c	translation initiation factor 4E (eIF4E)	-1.72128	-0.814766												√		√	√			3	NO	YES
PF3D7_1306400	PF13_0033	26S proteasome regulatory subunit, putative	1.17259	-0.815262	√		transcribed									√		√	√			3	YES	YES
PF3D7_1454400	PF14_0517	aminopeptidase P (APP)	-0.53325	-0.822734												√		√	√			3	NO	YES
PF3D7_1103600	PF11_0047	actin-like protein, putative	0.257232	-0.834223												√		√	√			3	NO	YES
PF3D7_1462300	PF14_0593	conserved Plasmodium protein, unknown function	-1.06836	-0.839326												√		√	√			3	NO	YES
PF3D7_1308200	PF13_0044	carbamoyl phosphate synthetase (cpsSII)	0.279371	-0.839872												√		√	√			3	NO	YES
PF3D7_1425900	PF14_0239	conserved Plasmodium protein, unknown function	-0.783749	-0.843004												√		√	√			3	NO	YES
PF3D7_0826700	PF08_0019	receptor for activated c kinase (RACK)	0.579479	-0.846745												√		√	√			3	NO	YES
PF3D7_1132200	PF11_0331	TCP-1/cpn60 chaperonin family, putative	1.67691	-0.848498	√		transcribed									√		√	√			3	YES	YES
PF3D7_0422100	PFD1037w	transmembrane emp24 domain-containing protein, putative	-0.137104	-0.848993										√		√				√		3	NO	YES
PF3D7_0516200	PFE0810c	40S ribosomal protein S14, putative	-2.36629	-0.849899												√		√	√			3	NO	YES
PF3D7_1468100	PF14_0649	conserved Plasmodium protein, unknown function	-0.70454	-0.850128												√		√	√			3	NO	YES
PF3D7_1124900	PF11_0260	60S ribosomal protein L35, putative	0.37345	-0.862007									√			√			√			3	NO	YES
PF3D7_1325100	PF13_0143	phosphoribosylpyrophosphate synthetase	0.759086	-0.862994												√		√	√			3	NO	YES
PF3D7_1332900	PF13_0179	isoleucine-tRNA ligase, putative	-0.83455	-0.868086												√		√	√			3	NO	YES
PF3D7_1421200	PF14_0205	40S ribosomal protein S25, putative	-2.33322	-0.869716												√		√	√			3	NO	YES
PF3D7_0903400	PFI0165c	DEAD/DEAH box helicase, putative	0.272584	-0.870285												√		√	√			3	NO	YES
PF3D7_1429400	PF14_0273	rRNA (adenosine-2'-O-)-methyltransferase, putative	0.114596	-0.87139												√				√	√	3	NO	YES
PF3D7_1332800	PF13_0178	translation initiation factor 6, putative	-1.59751	-0.871819												√		√	√			3	NO	YES
PF3D7_1010600	PF10_0103	eukaryotic translation initiation factor 2 beta subunit, putative	-1.0842	-0.873097												√		√	√			3	NO	YES
PF3D7_1355500	MAL13P1.274	serine/threonine protein phosphatase (PP5)	-0.73612	-0.876641												√		√	√			3	NO	YES
PF3D7_0823200	MAL8P1.40	RNA binding protein, putative	1.38092	-0.877478	√		transcribed									√		√	√			3	YES	YES
PF3D7_1216900	PFL0815w	DNA-binding chaperone, putative	0.0779965	-0.88081												√		√	√			3	NO	YES
PF3D7_1446200	PF14_0439	M17 leucyl aminopeptidase (LAP)	-0.002915	-0.881358												√		√	√			3	NO	YES
PF3D7_1442300	PF14_0401	tRNA binding protein, putative	-0.147288	-0.884092												√		√	√			3	NO	YES
PF3D7_0719700	PF07_0080	40S ribosomal protein S10, putative	-1.74038	-0.893032												√		√	√			3	NO	YES
PF3D7_1017900	PF10_0174	26s proteasome regulatory subunit p55, putative	-0.0866085	-0.895148												√		√	√			3	NO	YES
PF3D7_0727200	MAL7P1.150	cysteine desulfurase, putative (NFS)	0.067362	-0.898749												√		√	√			3	NO	YES
PF3D7_0907700	PFI0370c	subunit of proteaseome activator complex, putative	0.038603	-0.899569												√		√	√			3	NO	YES
PF3D7_1116200.1	PF11_0169	pyridoxine biosynthesis protein PDX2 (PDX2)	-1.41878	-0.900739												√		√	√			3	NO	YES
PF3D7_0627500	PFF1335c	4-methyl-5(B-hydroxyethyl)-thiazol monophosphate biosynthesis enzyme	0.789203	-0.901457												√		√	√			3	NO	YES
PF3D7_1334200	PF13_0190	chaperone binding protein, putative	-0.176347	-0.903074												√		√	√			3	NO	YES
PF3D7_0307200	PFC0300c	60S ribosomal protein L7, putative	-2.27741	-0.90721												√		√	√			3	NO	YES
PF3D7_1410600	PF14_0104	eukaryotic translation initiation factor 2 gamma subunit, putative	-0.219774	-0.908724												√		√	√			3	NO	YES
PF3D7_1437900	PF14_0359	HSP40, subfamily A, putative	1.57359	-0.913355	√		transcribed									√		√	√			3	YES	YES
PF3D7_1333300	MAL13P1.171	transmembrane protein Tmp21 homologue, putative	-1.3062	-0.913758												√		√	√			3	NO	YES
PF3D7_0524400	PFE1215c	cytosolic preribosomal GTP-binding protein, putative	-0.900054	-0.915148												√		√	√			3	NO	YES
PF3D7_1143400	PF11_0447	translation initiation factor eIF-1A, putative	0.634653	-0.921203												√		√	√			3	NO	YES
PF3D7_0528200	PFE1405c	eukaryotic translation initiation factor 3, subunit 6, putative	-1.0643	-0.921941												√		√	√			3	NO	YES
PF3D7_1354500	PF13_0287	adenylosuccinate synthetase (adsS)	1.13615	-0.923991	√		transcribed									√		√	√			3	YES	YES
PF3D7_1311900	PF13_0065	vacuolar ATP synthase subunit a (vapA)	1.12299	-0.924726	√		transcribed									√		√	√			3	YES	YES
PF3D7_1033400	PF10_0325	haloacid dehalogenase-like hydrolase, putative	-0.890634	-0.932719												√		√	√			3	NO	YES
PF3D7_1357800	MAL13P1.283	TCP-1/cpn60 chaperonin family, putative	0.757097	-0.937959												√		√	√			3	NO	YES
PF3D7_0520900	PFE1050w	S-adenosyl-L-homocysteine hydrolase (SAHH)	0.360311	-0.940335												√		√	√			3	NO	YES
PF3D7_1436000	PF14_0341	glucose-6-phosphate isomerase (GPI)	0.331786	-0.94054												√		√	√			3	NO	YES
PF3D7_0914700	PFI0720w	transporter, putative	0.190799	-0.943932												√		√	√			3	NO	YES
PF3D7_1249100	PFL2355w	conserved Plasmodium protein, unknown function	-0.441575	-0.945491												√		√	√			3	NO	YES
PF3D7_1142500	PF11_0437	60S ribosomal protein L28, putative	-2.21758	-0.94719												√		√	√			3	NO	YES
PF3D7_0909800	PFI0475w	small nuclear ribonucleoprotein Sm D3, putative (SNRPD3)	-1.33433	-0.953851												√		√	√			3	NO	YES
PF3D7_1453700	PF14_0510	co-chaperone p23 (P23)	0.176246	-0.957135												√		√	√			3	NO	YES
PF3D7_1013300	PF10_0130	conserved Plasmodium protein, unknown function	-0.169507	-0.958387												√		√	√			3	NO	YES
PF3D7_1117700	PF11_0183	GTP-binding nuclear protein ran/tc4 (RAN)	1.41224	-0.960424	√		transcribed									√		√	√			3	YES	YES
PF3D7_0922600	PFI1110w	glutamine synthetase, putative	-1.41033	-0.962536												√		√	√			3	NO	YES
PF3D7_0815600	MAL8P1.83	eukaryotic translation initiation factor, putative	-1.20015	-0.963033												√		√	√			3	NO	YES
PF3D7_1341300	MAL13P1.209	60S ribosomal protein L18-2, putative	-0.531747	-0.964662												√		√	√			3	NO	YES
PF3D7_1302800	PF13_0014	40S ribosomal protein S7, putative	-1.93377	-0.972579												√		√	√			3	NO	YES
PF3D7_1369500	MAL13P1.352	conserved Plasmodium protein, unknown function	-0.662375	-0.973491												√		√	√			3	NO	YES
PF3D7_1108700	PF11_0099	heat shock protein DnaJ homologue Pfj2	-0.0006925	-0.974588												√		√	√			3	NO	YES
PF3D7_1419200	PF14_0186	conserved Plasmodium protein, unknown function	0.231838	-0.97809												√		√	√			3	NO	YES
PF3D7_0517000	PFE0850c	60S ribosomal protein L12, putative	-0.506783	-0.983507												√		√	√			3	NO	YES
PF3D7_0922200	PFI1090w	S-adenosylmethionine synthetase (SAMS)	1.04663	-0.991591	√		transcribed									√		√	√			3	YES	YES
PF3D7_1338200	PF13_0213	60S ribosomal protein L6-2, putative	-0.774039	-0.996554												√		√	√			3	NO	YES
PF3D7_0920800	PFI1020c	inosine-5'-monophosphate dehydrogenase	0.307725	-1.00035												√		√	√			3	NO	YES
PF3D7_1319300	PF13_0109	N2,N2-dimethylguanosine tRNA methyltransferase, putative	-0.604876	-1.00175												√		√	√			3	NO	YES
PF3D7_0626800	PFF1300w	pyruvate kinase (PyrK)	0.332653	-1.005												√		√	√			3	NO	YES
PF3D7_1347500	MAL13P1.237	DNA/RNA-binding protein Alba 4 (ALBA4)	1.50339	-1.0114	√		transcribed									√		√	√			3	YES	YES
PF3D7_0319600	PFC0870w	elongation factor 1 (EF-1), putative	1.19977	-1.01237	√		transcribed									√		√	√			3	YES	YES
PF3D7_1428300	PF14_0261	proliferation-associated protein 2g4, putative	1.30163	-1.01253	√		transcribed									√		√	√			3	YES	YES
PF3D7_1108400	PF11_0096	casein kinase 2, alpha subunit (CK2alpha)	1.63019	-1.01389	√		transcribed									√		√	√			3	YES	YES
PF3D7_1439800	PF14_0377	vesicle-associated membrane protein, putative	0.86148	-1.01429												√		√	√			3	NO	YES
PF3D7_1343000	MAL13P1.214	phosphoethanolamine N-methyltransferase (PMT)	0.564036	-1.01469												√		√	√			3	NO	YES
PF3D7_0629200	PFF1415c	DnaJ protein, putative	-0.276231	-1.02165												√		√	√			3	NO	YES
PF3D7_1441200	PF14_0391	60S ribosomal protein L1, putative	-2.06611	-1.02468												√		√	√			3	NO	YES
PF3D7_0720000	MAL7P1.104	3'-5' exoribonuclease Csl4 homolog, putative	0.69324	-1.02561												√		√	√			3	NO	YES
PF3D7_1012600	PF10_0123	GMP synthetase (GMPS)	0.863221	-1.02587												√		√	√			3	NO	YES
PF3D7_0524000	PFE1195w	karyopherin beta (KASbeta)	-1.13767	-1.02861												√		√	√			3	NO	YES
PF3D7_0810600	PF08_0096	RNA helicase, putative	0.0267075	-1.02961												√		√	√			3	NO	YES
PF3D7_0621200	PFF1025c	pyridoxine biosynthesis protein PDX1 (PDX1)	1.93555	-1.03023	√		transcribed									√		√	√			3	YES	YES
PF3D7_1426200	PF14_0242	arginine methyltransferase 1 (PRMT1)	1.62977	-1.03284	√		transcribed									√		√	√			3	YES	YES
PF3D7_0923000	PFI1130c	DNA-directed RNA polymerase II, putative	-1.61977	-1.03573												√		√	√			3	NO	YES
PF3D7_1447000	PF14_0448	40S ribosomal protein S2, putative	1.81154	-1.03779	√		transcribed									√		√	√			3	YES	YES
PF3D7_1026800	PF10_0264	40S ribosomal protein S2B, putative	0.780311	-1.03955												√		√	√			3	NO	YES
PF3D7_1460700	PF14_0579	60S ribosomal protein L27, putative	-2.01177	-1.04343												√		√	√			3	NO	YES
PF3D7_1352500	PF13_0272	thioredoxin-related protein, putative	0.244895	-1.05712												√		√	√			3	NO	YES
PF3D7_1304900	PF13_0023	DNA-directed RNA polymerase 2, putative	-0.186167	-1.06037												√		√	√			3	NO	YES
PF3D7_1104400	PF11_0055	conserved protein, unknown function	-0.018606	-1.06072												√		√	√			3	NO	YES
PF3D7_1307000	MAL13P1.36	PNAS-3 related protein, putative	1.3517	-1.06096	√		transcribed									√		√	√			3	YES	YES
PF3D7_0913200	PFI0645w	elongation factor 1-beta (EF-1beta)	0.8307	-1.06211												√		√	√			3	NO	YES
PF3D7_1338300	PF13_0214	elongation factor 1-gamma, putative	0.223768	-1.06819												√		√	√			3	NO	YES
PF3D7_1317800	MAL13P1.92	40S ribosomal protein S15/S19, putative	-0.708479	-1.07797												√		√	√			3	NO	YES
PF3D7_1029600	PF10_0289	adenosine deaminase, putative	1.57887	-1.08345	√		transcribed									√		√	√			3	YES	YES
PF3D7_1309100	PF13_0049	60S ribosomal protein L24, putative	1.21561	-1.0861	√		transcribed									√		√	√			3	YES	YES
PF3D7_1447700	PF14_0453	conserved Plasmodium protein, unknown function	-1.62383	-1.08683												√		√	√			3	NO	YES
PF3D7_1104000	PF11_0051	phenylalanyl-tRNA synthetase beta chain, putative	1.47533	-1.08744	√		transcribed									√		√	√			3	YES	YES
PF3D7_0716800	MAL7P1.81	eukaryotic translation initiation factor 3 37.28 kDa subunit, putative	0.479497	-1.09099												√		√	√			3	NO	YES
PF3D7_0322900	PFC1020c	40S ribosomal protein S3A, putative	-2.15801	-1.09373												√		√	√			3	NO	YES
PF3D7_1408000	PF14_0077	plasmepsin II	-1.93941	-1.0976												√		√	√			3	NO	YES
PF3D7_1020900	PF10_0203	ADP-ribosylation factor (ARF1)	0.665037	-1.10571												√		√	√			3	NO	YES
PF3D7_1351400	PF13_0268	60S ribosomal protein L17, putative	-1.79305	-1.10897												√		√	√			3	NO	YES
PF3D7_1027400	PF10_0269	DNA-directed RNA polymerase II, putative	-0.578749	-1.11074												√		√	√			3	NO	YES
PF3D7_1331800	PF13_0171	60S ribosomal protein L23, putative	-0.460272	-1.11147												√		√	√			3	NO	YES
PF3D7_1439900	PF14_0378	triosephosphate isomerase (TIM)	1.35575	-1.11966	√		transcribed									√		√	√			3	YES	YES
PF3D7_1037700	PF10_0370	enhancer of rudimentary homolog, putative (ERH)	-0.770188	-1.12595												√		√	√			3	NO	YES
PF3D7_1408600	PF14_0083	40S ribosomal protein S8e, putative	-1.56873	-1.12794												√		√	√			3	NO	YES
PF3D7_1341200	PF13_0224	60S ribosomal protein L18, putative	-2.17345	-1.13132												√		√	√			3	NO	YES
PF3D7_1037300	PF10_0366	ADP/ATP transporter on adenylate translocase	1.66243	-1.13455	√		transcribed									√		√	√			3	YES	YES
PF3D7_0520000	PFE1005w	40S ribosomal protein S9, putative	-0.761939	-1.14046												√		√	√			3	NO	YES
PF3D7_0306900	PFC0290w	40S ribosomal protein S23, putative	0.829425	-1.1425												√		√	√			3	NO	YES
PF3D7_1457300	PF14_0546	conserved Plasmodium protein, unknown function	0.889151	-1.1583												√		√	√			3	NO	YES
PF3D7_0416800	PFD0810w	small GTP-binding protein sar1 (SAR1)	1.19583	-1.16026	√		transcribed									√		√	√			3	YES	YES
PF3D7_0317600	PFC0775w	40S ribosomal protein S11, putative	-1.35778	-1.16477												√		√	√			3	NO	YES
PF3D7_1006200	PF10_0063	DNA/RNA-binding protein Alba 3 (ALBA3)	0.225944	-1.17207												√		√	√			3	NO	YES
PF3D7_1465900	PF14_0627	40S ribosomal protein S3, putative	0.976152	-1.17444												√		√	√			3	NO	YES
PF3D7_0618300	PFF0885w	60S ribosomal protein L27a, putative	-1.01899	-1.17492												√		√	√			3	NO	YES
PF3D7_0503800	PFE0185c	60S ribosomal protein L31, putative	-2.22547	-1.1803												√		√	√			3	NO	YES
PF3D7_1130200	PF11_0313	60S ribosomal protein P0	1.20614	-1.18309	√		transcribed									√		√	√			3	YES	YES
PF3D7_1351100	MAL13P1.257	conserved Plasmodium protein, unknown function	1.4884	-1.18999	√		transcribed									√		√	√			3	YES	YES
PF3D7_1229400	PFL1420w	macrophage migration inhibitory factor (MIF)	1.39265	-1.20319	√		transcribed									√		√	√			3	YES	YES
PF3D7_0813900	PF08_0076	40S ribosomal protein S16, putative	-2.05169	-1.20672												√		√	√			3	NO	YES
PF3D7_1015900	PF10_0155	enolase (ENO)	1.18247	-1.2229	√		transcribed									√		√	√			3	YES	YES
PF3D7_1426000	PF14_0240	60S ribosomal protein L21e, putative	-2.24126	-1.24168												√		√	√			3	NO	YES
PF3D7_0621800	PFF1050w	nascent polypeptide associated complex alpha chain, putative	-0.107426	-1.24605												√		√	√			3	NO	YES
PF3D7_1019400	PF10_0187	60S ribosomal protein L30e, putative	-2.16936	-1.24635												√		√	√			3	NO	YES
PF3D7_1120100	PF11_0208	phosphoglycerate mutase, putative (PGM1)	-0.992261	-1.24984												√		√	√			3	NO	YES
PF3D7_1323500	PF13_0133	plasmepsin V (PMV)	-1.7246	-1.27217												√		√	√			3	NO	YES
PF3D7_1408100	PF14_0078	plasmepsin III,histo-aspartic protease (HAP)	1.17438	-1.30163	√		transcribed									√		√	√			3	YES	YES
PF3D7_1414300	PF14_0141	60S ribosomal protein L10, putative	1.26405	-1.31452	√		transcribed									√		√	√			3	YES	YES
PF3D7_0519400	PFE0975c	40S ribosomal protein S24, putative	0.288662	-1.32495												√		√	√			3	NO	YES
PF3D7_0422400	PFD1055w	40S ribosomal protein S19, putative	-2.32781	-1.3269												√		√	√			3	NO	YES
PF3D7_1424100	PF14_0230	60S ribosomal protein L5, putative	0.995479	-1.33383												√		√	√			3	NO	YES
PF3D7_1324900	PF13_0141	L-lactate dehydrogenase (LDH)	0.185952	-1.37389												√		√	√			3	NO	YES
PF3D7_1358800	PF13_0316	40S ribosomal protein S13, putative	1.25733	-1.41757	√		transcribed									√		√	√			3	YES	YES
PF3D7_0307100	PFC0295c	40S ribosomal protein S12, putative	-2.33635	-1.42137												√		√	√			3	NO	YES
PF3D7_1426100	PF14_0241	basic transcription factor 3b, putative	0.174426	-1.42818												√		√	√			3	NO	YES
PF3D7_1003500	PF10_0038	40S ribosomal protein S20e, putative	-0.648494	-1.43149												√		√	√			3	NO	YES
PF3D7_1105400	PF11_0065	40S ribosomal protein S4, putative	0.55472	-1.43642												√		√	√			3	NO	YES
PF3D7_0309600	PFC0400w	60S acidic ribosomal protein P2, putative	0.372597	-1.43878												√		√	√			3	NO	YES
PF3D7_0706400	MAL7P1.320	ribosomal protein, L37e, putative	1.09104	-1.48038	√		transcribed									√				√	√	3	YES	YES
PF3D7_0415900	PFD0770c	60S ribosomal protein L15, putative	1.7491	-1.50116	√		transcribed									√		√	√			3	YES	YES
PF3D7_0614500	PFF0700c	60S ribosomal protein L19, putative	1.48997	-1.5562	√		transcribed									√		√	√			3	YES	YES
PF3D7_1144000	PF11_0454	40S ribosomal protein S21e, putative	-1.80217	-1.59683												√		√	√			3	NO	YES
PF3D7_0513300	PFE0660c	purine nucleoside phosphorylase (PNP)	2.28801	-1.63599	√		transcribed									√		√	√			3	YES	YES
PF3D7_1204300	PFL0210c	eukaryotic translation initiation factor 5A (EIF5A)	0.897066	-1.78472												√		√	√			3	NO	YES
PF3D7_1130100	PF11_0312	60S ribosomal protein L38e, putative	0.235009	-1.81563												√		√	√			3	NO	YES
PF3D7_0821700	PF08_0039	60S ribosomal protein L22, putative	1.63999	-1.82593	√		transcribed									√		√	√			3	YES	YES
PF3D7_0719600	PF07_0079	60S ribosomal protein L11a, putative	1.57581	-1.8455	√		transcribed									√		√	√			3	YES	YES
PF3D7_1012400	PF10_0121	hypoxanthine-guanine phosphoribosyltransferase (HGPRT)	1.90856	-2.02976	√		transcribed									√		√	√			3	YES	YES
PF3D7_0107200	PFA0355w	carbon catabolite repressor protein 4, putative	n.d.	n.d.									√	√		√						3	NO	YES
PF3D7_0900500	PFI0025c	rifin (RIF)	n.d.	n.d.									√	√		√						3	NO	YES
PF3D7_1409200.2	PF14_0089-b	conserved Plasmodium protein, unknown function	n.d.	n.d.									√			√			√			3	NO	YES
PF3D7_1435700.2	PF14_0338-b	conserved Plasmodium protein, unknown function	n.d.	n.d.												√		√	√			3	NO	YES
PF3D7_0731500	MAL7P1.176	erythrocyte binding antigen-175 (EBA175)	0.514633	2.07115		√	stabilized	√							√	√						3	YES	YES
PF3D7_0601700	PFF0085w	Plasmodium exported protein (PHISTa), unknown function, pseudogene	-1.1807	1.70329		√	stabilized			√				√		√						3	YES	YES
PF3D7_1236200	PFL1750c	conserved Plasmodium protein, unknown function	-1.91966	1.40327		√	stabilized								√	√	√					3	YES	YES
PF3D7_1478000	PF14_0752	Plasmodium exported protein (PHISTa), unknown function (GEXP17)	-2.41382	1.32114		√	stabilized			√						√		√				3	YES	YES
PF3D7_0524200	PFE1205c	conserved Plasmodium membrane protein, unknown function	-1.52514	1.26973		√	stabilized						√	√		√						3	YES	YES
PF3D7_0828600	MAL8P1.13	folate transporter 1 (FT1)	-2.06328	1.229		√	stabilized						√	√		√						3	YES	YES
PF3D7_0214700	PFB0670c	conserved Plasmodium protein, unknown function	-0.797863	1.2283		√	stabilized							√	√	√						3	YES	YES
PF3D7_1021800	PF10_0212a	conserved Plasmodium protein, unknown function	-0.641862	1.18397		√	stabilized	√							√	√						3	YES	YES
PF3D7_1435600	PF14_0337	conserved Plasmodium protein, unknown function	-1.18229	1.15931		√	stabilized								√	√		√				3	YES	YES
PF3D7_1454900	PF14_0522	conserved Plasmodium protein, unknown function	1.34096	1.13345	√	√	balance						√		√	√						3	YES	YES
PF3D7_1426400	PF14_0243b	MORN repeat protein, putative	0.131694	1.12121		√	stabilized		√				√			√						3	YES	YES
PF3D7_0423800	PFD1130w	conserved Plasmodium protein, unknown function	-1.45351	1.11654		√	stabilized	√							√	√						3	YES	YES
PF3D7_1221100	PFL1015w-a	conserved Plasmodium protein, unknown function	-0.400091	1.11445		√	stabilized						√		√	√						3	YES	YES
PF3D7_1238900	PFL1885c	protein kinase 2 (PK2)	-1.98433	1.1058		√	stabilized	√				√				√						3	YES	YES
PF3D7_1435200	PF14_0333	conserved Plasmodium protein, unknown function	-1.2929	1.09332		√	stabilized		√						√	√						3	YES	YES
PF3D7_1006900	PF10_0069	PPPDE peptidase, putative	0.849257	1.05383		√	stabilized						√	√		√						3	YES	YES
PF3D7_1108100	PF11_0094	conserved Plasmodium protein, unknown function	-1.62826	1.04472		√	stabilized								√	√			√			3	YES	YES
PF3D7_0729700	PF07_0124	conserved Plasmodium protein, unknown function	-0.665914	1.00779		√	stabilized		√					√		√						3	YES	YES
PF3D7_0423400	PFD1105w	asparagine-rich protein (AARP)	-1.54844	1.00572		√	stabilized	√							√	√						3	YES	YES
PF3D7_1329700	MAL13P1.156	conserved Plasmodium protein, unknown function	-0.692074	0.994652									√		√	√						3	NO	YES
PF3D7_1145200	PF11_0464	serine/threonine protein kinase, putative	-1.58748	0.965101								√			√	√						3	NO	YES
PF3D7_0611600	PFF0570c	conserved Plasmodium protein, unknown function	0.312004	0.953141										√	√	√						3	NO	YES
PF3D7_1401900	PF14_0021	conserved Plasmodium protein, unknown function	0.167304	0.944373									√		√	√						3	NO	YES
PF3D7_1350800	PF13_0266	conserved Plasmodium protein, unknown function	-1.95745	0.933659									√		√	√						3	NO	YES
PF3D7_1222800	PFL1095c	conserved Plasmodium protein, unknown function	0.293537	0.904973									√		√	√						3	NO	YES
PF3D7_1029900	PF10_0292	conserved Plasmodium protein, unknown function	-0.879169	0.894161											√	√			√			3	NO	YES
PF3D7_1344500	MAL13P1.219	conserved Plasmodium protein, unknown function	0.263533	0.891531									√		√	√						3	NO	YES
PF3D7_0628300	PFF1375c	choline/ethanolaminephosphotransferase, putative (CEPT)	-2.32871	0.860347				√								√			√			3	NO	YES
PF3D7_1003000	PF10_0034	conserved Plasmodium protein, unknown function	0.104175	0.852755										√	√	√						3	NO	YES
PF3D7_0525300	PFE1260c	conserved Plasmodium protein, unknown function	-1.87166	0.851913									√	√		√						3	NO	YES
PF3D7_1250400	PFL2420w	conserved Plasmodium protein, unknown function	-0.241758	0.851175									√		√	√						3	NO	YES
PF3D7_0403900	PFD0190w	SET domain protein, putative (SET8)	-0.968974	0.845873										√	√	√						3	NO	YES
PF3D7_1356800	MAL13P1.278	serine/threonine protein kinase, putative (ARK3)	-1.32039	0.845858								√			√	√						3	NO	YES
PF3D7_0724800	MAL7P1.137	kelch protein, putative	-1.18489	0.842147										√	√	√						3	NO	YES
PF3D7_0607600	PFF0375c	conserved Plasmodium protein, unknown function	-0.822168	0.83451												√			√	√		3	NO	YES
PF3D7_1229800	PFL1435c	myosin D (MyoD)	-1.30537	0.827503				√							√	√						3	NO	YES
PF3D7_0803200	MAL8P1.146	filament assembling protein, putative	-1.09941	0.822795											√	√			√			3	NO	YES
PF3D7_0607700	PFF0380w	conserved Plasmodium protein, unknown function	-1.49525	0.813285										√	√	√						3	NO	YES
PF3D7_1410800	PF14_0106	ankyrin-repeat protein, putative	-1.55411	0.792351											√	√			√			3	NO	YES
PF3D7_0603600	PFF0175c	conserved Plasmodium protein, unknown function	-0.544553	0.791683					√					√		√						3	NO	YES
PF3D7_0926500	PFI1300c	conserved Plasmodium protein, unknown function	-1.67387	0.789977										√	√	√						3	NO	YES
PF3D7_0207600	PFB0340c	serine repeat antigen 5 (SERA5)	-0.625779	0.779812											√	√				√		3	NO	YES
PF3D7_1429200	PF14_0271	transcription factor with AP2 domain(s), putative (ApiAP2)	0.319534	0.770439											√	√		√				3	NO	YES
PF3D7_0926600	PFI1305w	conserved Plasmodium membrane protein, unknown function	1.06685	0.756182	√		transcribed							√	√	√						3	YES	YES
PF3D7_1360500	MAL13P1.301	guanylyl cyclase beta (GCbeta)	1.02941	0.739087	√		transcribed		√							√			√			3	YES	YES
PF3D7_1228600	PFL1385c	merozoite surface protein 9 (MSP9)	-0.660775	0.729326											√	√				√		3	NO	YES
PF3D7_0619700	PFF0960c	conserved Plasmodium protein, unknown function	-0.824436	0.720976										√		√			√			3	NO	YES
PF3D7_1362900	MAL13P1.316	conserved Plasmodium protein, unknown function	0.024282	0.695291					√						√	√						3	NO	YES
PF3D7_1149200	PF11_0509	ring-infected erythrocyte surface antigen	-0.383451	0.684553											√	√		√				3	NO	YES
PF3D7_1223000	PFL1105c	conserved Plasmodium protein, unknown function	-2.19486	0.682671									√		√	√						3	NO	YES
PF3D7_0917200	PFI0840w	conserved Plasmodium membrane protein, unknown function	1.5609	0.680236	√		transcribed						√	√		√						3	YES	YES
PF3D7_1003400	PF10_0037	conserved Plasmodium protein, unknown function	-1.41645	0.674751				√						√		√						3	NO	YES
PF3D7_0728500	MAL7P1.154a	conserved Plasmodium protein, unknown function	-0.581919	0.672587									√	√		√						3	NO	YES
PF3D7_0720300	MAL7P1.105	conserved Plasmodium protein, unknown function	1.57382	0.667176	√		transcribed							√	√	√						3	YES	YES
PF3D7_0423300	PFD1100c	conserved Plasmodium protein, unknown function	-0.091283	0.660586										√	√	√						3	NO	YES
PF3D7_0927600	PFI1355w	conserved Plasmodium protein, unknown function	-1.93178	0.655404										√	√	√						3	NO	YES
PF3D7_0218100	PFB0845w	conserved Plasmodium membrane protein, unknown function	0.245991	0.652555									√	√		√						3	NO	YES
PF3D7_0507200	PFE0355c	subtilisin-like protease 3, putative (SUB3)	-0.923264	0.651213										√	√	√						3	NO	YES
PF3D7_0717600	MAL7P1.87	conserved Plasmodium protein, unknown function	-1.62476	0.6207										√	√	√						3	NO	YES
PF3D7_1026400	PF10_0261	WD-repeat protein, putative	0.166195	0.616216									√		√	√						3	NO	YES
PF3D7_0102400	PFA0120c	lysophospholipase, putative, pseudogene	-1.18758	0.615825									√	√		√						3	NO	YES
PF3D7_1134600	PF11_0357	zinc finger protein, putative	-0.713782	0.575203												√	√	√				3	NO	YES
PF3D7_1460000	PF14_0573	biotin protein ligase, putative	0.37787	0.573115	√		transcribed						√			√			√			3	YES	YES
PF3D7_1252500	PFL2525c	Plasmodium exported protein, unknown function	0.240829	0.572088									√			√	√					3	NO	YES
PF3D7_1365600	MAL13P1.328	DNA topoisomerase VI, b subunit, putative	0.117972	0.572059					√							√			√			3	NO	YES
PF3D7_1330500	PF13_0164	conserved Plasmodium protein, unknown function	0.709048	0.564199											√	√			√			3	NO	YES
PF3D7_0614600	PFF0705c	conserved Plasmodium protein, unknown function	-0.332925	0.561411									√	√		√						3	NO	YES
PF3D7_1453500	PF14_0508	pyridine nucleotide transhydrogenase, putative	1.49138	0.550145	√		transcribed						√		√	√						3	YES	YES
PF3D7_1348700	MAL13P1.245	conserved Plasmodium protein, unknown function	0.864989	0.541261									√			√			√			3	NO	YES
PF3D7_0321400	PFC0945w	protein kinase, putative	-2.73866	0.537994										√	√	√						3	NO	YES
PF3D7_0933700	PFI1630c	conserved Plasmodium protein, unknown function	-1.08292	0.537592										√	√	√						3	NO	YES
PF3D7_1403300	PF14_0031	conserved Plasmodium protein, unknown function	1.27303	0.53126	√		transcribed						√			√			√			3	YES	YES
PF3D7_0912200	PFI0595c	conserved Plasmodium membrane protein, unknown function	1.34521	0.530295	√		transcribed							√	√	√						3	YES	YES
PF3D7_1121800	PF11_0226	petidase, M16 family	0.913721	0.529791	√		transcribed								√	√			√			3	YES	YES
PF3D7_1319600	PF13_0114	conserved Plasmodium protein, unknown function	-0.153446	0.528154					√						√	√						3	NO	YES
PF3D7_1015800	PF10_0154	ribonucleotide reductase small subunit, putative	-2.05824	0.52443												√		√	√			3	NO	YES
PF3D7_0213800	PFB0625w	conserved Plasmodium protein, unknown function	-0.89993	0.514839										√	√	√						3	NO	YES
PF3D7_1359800	MAL13P1.297	ADP-ribosylation factor, putative	-0.954497	0.514185									√		√	√						3	NO	YES
PF3D7_0809800	MAL8P1.112	conserved Plasmodium protein, unknown function	-0.130715	0.511249									√	√		√						3	NO	YES
PF3D7_0931700	PFI1540w	conserved Plasmodium protein, unknown function	1.63272	0.510927	√		transcribed							√	√	√						3	YES	YES
PF3D7_0106200	PFA0305c	conserved Plasmodium protein, unknown function	-0.968726	0.506343										√	√	√						3	NO	YES
PF3D7_1454800	PF14_0521	conserved Plasmodium protein, unknown function	1.31755	0.50493	√		transcribed						√		√	√						3	YES	YES
PF3D7_0919400	PFI0950w	protein disulfide isomerase (PDI9)	-1.15979	0.499457												√		√	√			3	NO	YES
PF3D7_1444200	PF14_0420	calmodulin-like protein	-0.8796	0.494664									√			√			√			3	NO	YES
PF3D7_1114100.2	PF11_0149-a	rhomboid protease ROM1	-0.573441	0.491837									√		√	√						3	NO	YES
PF3D7_0908100	PFI0390c	conserved Plasmodium membrane protein, unknown function	-1.70202	0.49027									√	√		√						3	NO	YES
PF3D7_1348100	MAL13P1.241	GTPase, putative	-1.48192	0.489196									√		√	√						3	NO	YES
PF3D7_0926800	PFI1315c	conserved Plasmodium protein, unknown function	-0.952136	0.489109										√	√	√						3	NO	YES
PF3D7_1209600	PFL0480w	porphobilinogen deaminase (PBGD)	-0.0474615	0.485384					√						√	√						3	NO	YES
PF3D7_1137500	PF11_0386	apicoplast ribosomal protein S14p/S29e precursor, putative	-1.14989	0.475835									√		√	√						3	NO	YES
PF3D7_0408800	PFD0435c	conserved Plasmodium protein, unknown function	1.54077	0.474664	√		transcribed							√	√	√						3	YES	YES
PF3D7_1038700	PF10_0377	Plasmodium exported protein, unknown function	-0.1062	0.473928									√			√	√					3	NO	YES
PF3D7_1471700	PF14_0684	conserved Plasmodium protein, unknown function	0.570037	0.473318	√		transcribed						√		√	√						3	YES	YES
PF3D7_0704100	MAL7P1.17	conserved Plasmodium membrane protein, unknown function	-0.539689	0.472294										√	√	√						3	NO	YES
PF3D7_1355600	PF13_0295	conserved Plasmodium protein, unknown function	1.08605	0.472075	√		transcribed						√			√		√				3	YES	YES
PF3D7_1420100	PF14_0195	conserved Plasmodium protein, unknown function	0.233201	0.47189	√		transcribed		√						√	√						3	YES	YES
PF3D7_1444100	PF14_0419	conserved Plasmodium protein, unknown function	-0.164437	0.459543												√				√	√	3	NO	YES
PF3D7_1133000	PF11_0340	conserved Plasmodium protein, unknown function	-1.72539	0.458213									√		√	√						3	NO	YES
PF3D7_0925600	PFI1255w	zinc binding protein (Yippee), putative	-0.362117	0.455336									√			√			√			3	NO	YES
PF3D7_0402100	PFD0095c	Plasmodium exported protein (PHISTb), unknown function	-1.75997	0.451651												√		√	√			3	NO	YES
PF3D7_0410800	PFD0535w	conserved Plasmodium protein, unknown function	-1.88952	0.451451												√		√	√			3	NO	YES
PF3D7_0418000	PFD0872w	conserved Plasmodium protein, unknown function	0.117763	0.451085										√		√			√			3	NO	YES
PF3D7_0820600	MAL8P1.56	conserved Plasmodium membrane protein, unknown function	-1.03634	0.444281									√	√		√						3	NO	YES
PF3D7_0925400	PFI1245c	protein phosphatase-beta	-1.02928	0.437336									√		√	√						3	NO	YES
PF3D7_1301900	MAL13P1.62	Plasmodium exported protein, unknown function	-0.839424	0.430579									√		√	√						3	NO	YES
PF3D7_0609500	PFF0470w	conserved Plasmodium protein, unknown function	0.728175	0.426268										√		√			√			3	NO	YES
PF3D7_1004600	PF10_0049	conserved Plasmodium membrane protein, unknown function	-0.319697	0.420421										√	√	√						3	NO	YES
PF3D7_1471800	PF14_0685	conserved Plasmodium protein, unknown function	-0.46428	0.414762									√		√	√						3	NO	YES
PF3D7_1017300.2	PF10_0168-a	golgi re-assembly stacking protein 2 (GRASP2)	-0.705332	0.414259											√	√		√				3	NO	YES
PF3D7_0729800	MAL7P1.161	dynein light chain, putative	1.33474	0.41135	√		transcribed						√	√		√						3	YES	YES
PF3D7_0217000	PFB0790c	conserved Plasmodium membrane protein, unknown function	0.028055	0.411125									√	√		√						3	NO	YES
PF3D7_1133200	PF11_0342	conserved Plasmodium protein, unknown function	0.403897	0.406438											√	√		√				3	NO	YES
PF3D7_0904300	PFI0210c	conserved protein, unknown function	0.960508	0.399283	√		transcribed		√					√		√						3	YES	YES
PF3D7_1360900	MAL13P1.303-a	polyadenylate-binding protein, putative	-1.88105	0.398908												√		√	√			3	NO	YES
PF3D7_1216700	PFL0805w	perforin like protein 2 (PPLP2)	1.29597	0.39439	√		transcribed								√	√			√			3	YES	YES
PF3D7_1021900	PF10_0213	conserved Plasmodium protein (10b antigen), unknown function	-0.909328	0.393378												√		√	√			3	NO	YES
PF3D7_0315300	PFC0650w	conserved Plasmodium protein, unknown function	0.686985	0.390745										√	√	√						3	NO	YES
PF3D7_1328200	PF13_0155	conserved Plasmodium protein, unknown function	-0.731456	0.389997												√				√	√	3	NO	YES
PF3D7_1031900	PF10_0313a	conserved Plasmodium protein, unknown function	1.37291	0.3872	√		transcribed						√		√	√						3	YES	YES
PF3D7_0729600	MAL7P1.160-a	conserved Plasmodium protein, unknown function	-0.502586	0.384106									√	√		√						3	NO	YES
PF3D7_0929300	PFI1440w	conserved Plasmodium protein, unknown function	1.36684	0.381961	√		transcribed							√	√	√						3	YES	YES
PF3D7_1109100	PF11_0540a	conserved Plasmodium protein, unknown function	0.877075	0.381006	√		transcribed						√		√	√						3	YES	YES
PF3D7_1322200	MAL13P1.124	conserved Plasmodium protein, unknown function	-0.915059	0.377998												√		√	√			3	NO	YES
PF3D7_0211600	PFB0515w	dolichol-linked oligosaccharide biosynthesis enzyme, putative	-0.0383425	0.376018									√	√		√						3	NO	YES
PF3D7_0102700	PFA0135w	merozoite-associated tryptophan-rich antigen, putative	-0.449623	0.373382										√	√	√						3	NO	YES
PF3D7_0611500	PFF0565c	conserved Plasmodium protein, unknown function	0.114765	0.372637									√	√		√						3	NO	YES
PF3D7_0709900	MAL7P1.29	conserved Plasmodium membrane protein, unknown function	0.409983	0.372381										√	√	√						3	NO	YES
PF3D7_1422200	PF14_0213	conserved Plasmodium protein, unknown function	-1.95123	0.372008									√		√	√						3	NO	YES
PF3D7_1319200	PF13_0107	conserved Plasmodium protein, unknown function	1.49307	0.370002	√		transcribed								√	√			√			3	YES	YES
PF3D7_1234400	PFL1660c	conserved Plasmodium protein, unknown function	1.30219	0.364437	√		transcribed						√			√			√			3	YES	YES
PF3D7_0313900	PFC0580c	conserved Plasmodium protein, unknown function	0.896908	0.363687									√	√		√						3	NO	YES
PF3D7_1005400	PF10_0056	conserved Plasmodium protein, unknown function	0.850293	0.35804	√		transcribed						√	√		√						3	YES	YES
PF3D7_1005800	PF10_0059	conserved Plasmodium membrane protein, unknown function	-1.09013	0.356932										√	√	√						3	NO	YES
PF3D7_0312200	PFC0515c	TPR domain containing protein	-0.651184	0.354224										√	√	√						3	NO	YES
PF3D7_1103900	PF11_0050	conserved Plasmodium protein, unknown function	-0.234711	0.349891												√				√	√	3	NO	YES
PF3D7_0322200	PFC0990c	conserved Plasmodium protein, unknown function	1.62682	0.346251	√		transcribed						√	√		√						3	YES	YES
PF3D7_0216500	PFB0755w	conserved Plasmodium protein, unknown function	0.48659	0.345225										√	√	√						3	NO	YES
PF3D7_1247000.2	PFL2255w	DNA replication origin binding protein, putative	0.0530495	0.344546									√		√	√						3	NO	YES
PF3D7_0521800	PFE1090w	nucleotide binding protein, putative	-0.35166	0.339782										√		√			√			3	NO	YES
PF3D7_1404300	PF14_0040	secreted ookinete adhesive protein (SOAP)	1.43353	0.338626	√		transcribed					√			√	√						3	YES	YES
PF3D7_0818300	MAL8P1.68	conserved Plasmodium protein, unknown function	-0.113538	0.335847	√		transcribed							√	√	√						3	YES	YES
PF3D7_1005300	PF10_0055	conserved Plasmodium protein, unknown function	0.79418	0.335046	√		transcribed						√	√		√						3	YES	YES
PF3D7_1021200	PF10_0206	conserved Plasmodium protein, unknown function	-0.543739	0.334764											√	√			√			3	NO	YES
[truncated: 3,136 more rows]
