# Supplementary figures and images for: Capturing in vivo RNA transcriptional dynamics from the malaria parasite Plasmodium falciparum
Source: PubMed Central journal article supplement — Genome Res. 2017 Jun;27(6):1074–86. doi: 10.1101/gr.217356.116 (PMC5453321; doi:10.1101/gr.217356.116), 2017-06

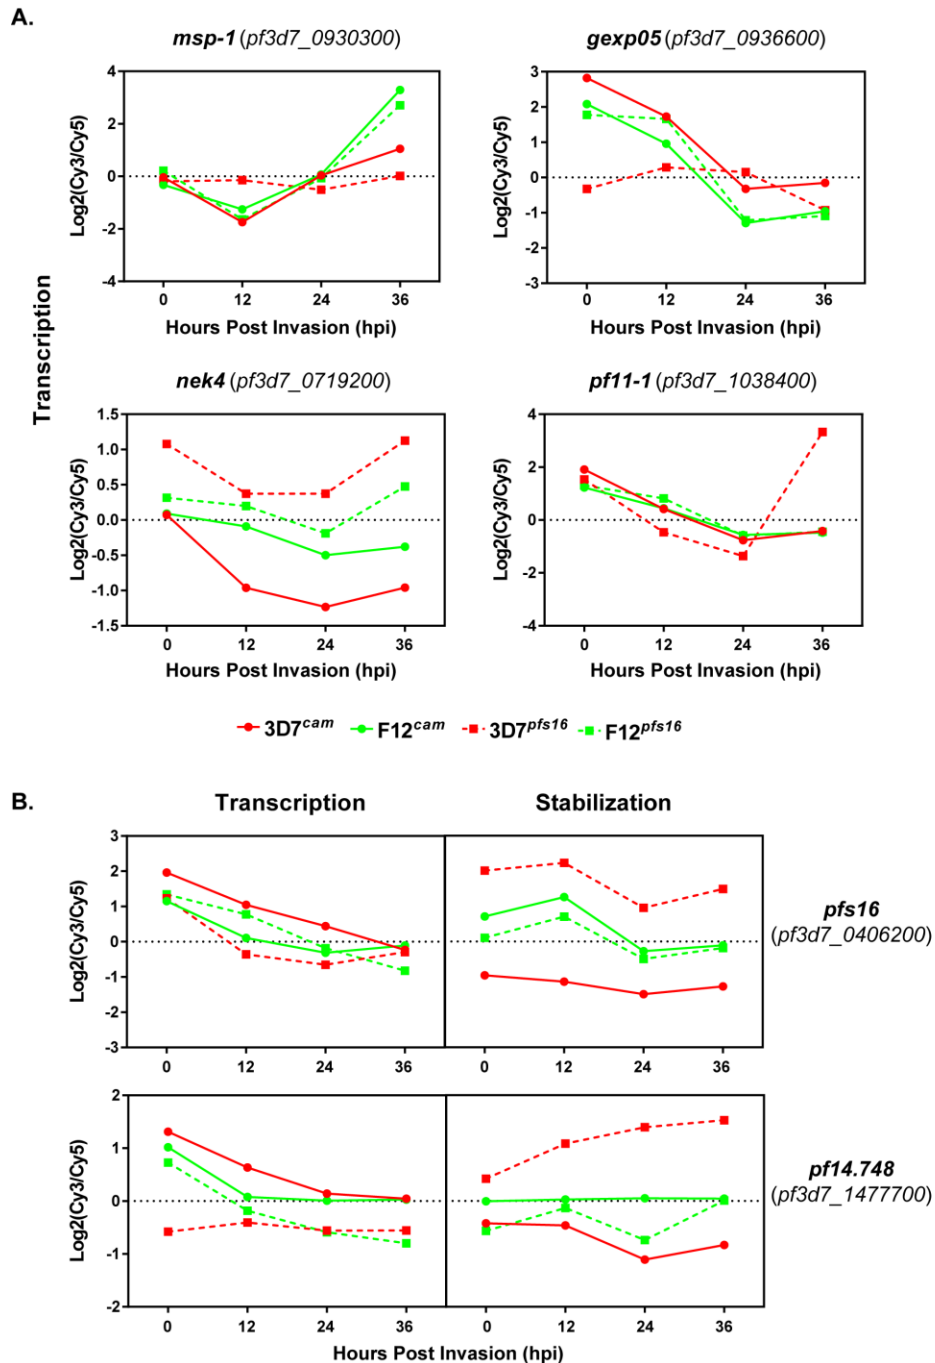

Supplement: supp_gr.217356.116_Supplemental_Figure_S5.pdf [file supp_gr.217356.116_Supplemental_Figure_S5.pdf]
